# Supplementary material for: Ocimum metabolomics in response to abiotic stresses: Cold, flood, drought and salinity
Source: PLoS One. 2019 Feb 6;14(2):e0210903. doi: 10.1371/journal.pone.0210903 (PMC6364901; doi:10.1371/journal.pone.0210903)
Supplement: S3 Dataset — (XLSX) [file pone.0210903.s003.xlsx]

## Sheet: Combined
ID	Control_Seq_ID	Flood_Seq_ID	Sequence_Description	Control_baseMean	Flood_baseMean	foldChange	log2FoldChange	pval	Significance	padj	Significance	Regulation
XP_011071684	CDS_23490_Unigene_37937	CDS_25380_Unigene_40962	PHYTOCHROME KINASE SUBSTRATE 3-like	3.65148	4591.01	1257.3	10.2961	3.08055e-07	Yes	0.00513343	Yes	Up
AJD25200	CDS_2292_Unigene_5195	CDS_1921_Unigene_4179	cytochrome P450 CYP82D70	18.2574	13963.6	764.82	9.57898	8.384e-07	Yes	0.00698555	Yes	Up
AGZ90153	CDS_334_Unigene_714	CDS_7454_Unigene_14068	elongation factor 1- partial	32.8634	35889	1092.07	10.0928	1.43646e-06	Yes	0.00797906	Yes	Up
EYU46421	CDS_10295_Unigene_19442	CDS_6664_Unigene_12826	hypothetical protein MIMGU_mgv1a001868mg	27.3861	13987.7	510.76	8.9965	2.15357e-06	Yes	0.00897177	Yes	Up
EYU27838	CDS_1284_Unigene_2792	CDS_3973_Unigene_7681	hypothetical protein MIMGU_mgv1a002249mg	33.7762	19681.9	582.714	9.18664	2.43357e-06	Yes	0.0081106	Yes	Up
XP_011075655	CDS_2526_Unigene_5868	CDS_32624_Unigene_51667	auxin efflux carrier component 7-like	31.9505	14732.6	461.109	8.84896	2.92678e-06	Yes	0.00812864	Yes	Up
XP_011100245	CDS_12189_Unigene_22188	CDS_34281_Unigene_55096	26S proteasome non-ATPase regulatory subunit 2 homolog A-like	38.3406	17936.8	467.829	8.86984	3.60417e-06	Yes	0.00857998	Yes	Up
XP_011070630	CDS_1509_Unigene_3276	CDS_6620_Unigene_12754	auxin efflux carrier component 7-like	25.5604	8772.32	343.2	8.42291	3.64195e-06	Yes	0.00758618	Yes	Up
XP_011081443	CDS_3172_Unigene_7079	CDS_32698_Unigene_51750	cellulose synthase G3	18.2574	6044.67	331.08	8.37104	3.78441e-06	Yes	0.00700705	Yes	Up
XP_009626262	CDS_7833_Unigene_15513	CDS_977_Unigene_2086	glyoxylate hydroxypyruvate reductase HPR3-like	20.0832	6123.54	304.909	8.25224	4.59862e-06	Yes	0.00766314	Yes	Up
XP_003593234	CDS_12972_Unigene_23286	CDS_7173_Unigene_13677	2-oxoglutarate malate translocator	7.30297	3325.77	455.4	8.83099	4.70215e-06	Yes	0.00712333	Yes	Up
XP_012833351	CDS_12051_Unigene_22012	CDS_29005_Unigene_46192	ATP synthase subunit mitochondrial	43.8178	18057.3	412.1	8.68685	4.887e-06	Yes	0.00678641	Yes	Up
XP_011093699	CDS_12160_Unigene_22167	CDS_341_Unigene_747	serine acetyltransferase 5-like	21.9089	6181.6	282.15	8.14032	5.54076e-06	Yes	0.0071024	Yes	Up
XP_011085509	CDS_39984_Unigene_62893	CDS_6537_Unigene_12630	L-ascorbate oxidase homolog	7103.05	25.1952	0.0035471	-8.13914	5.70458e-06	Yes	0.00679008	Yes	Down
XP_011079922	CDS_12426_Unigene_22539	CDS_6655_Unigene_12809	BEACH domain-containing lvsA isoform X1	27.3861	7495.04	273.68	8.09635	6.00557e-06	Yes	0.00667179	Yes	Up
XP_011083657	CDS_39013_Unigene_60531	CDS_2424_Unigene_5072	50S ribosomal chloroplastic	21475.3	60.2495	0.00280553	-8.47751	8.5232e-06	Yes	0.00887691	Yes	Down
XP_011080481	CDS_349_Unigene_765	CDS_6586_Unigene_12699	ABC transporter G family member 35-like	11.8673	3608.4	304.062	8.24822	9.30392e-06	Yes	0.00912003	Yes	Up
AAR09603	CDS_1813_Unigene_4283	CDS_5964_Unigene_11772	O-methyltransferase	41.9921	8548.85	203.583	7.66947	1.30687e-05	Yes	0.0120987	Yes	Up
XP_011084213	CDS_38298_Unigene_58621	CDS_1801_Unigene_3853	UDP-glucuronate 4-epimerase 6	13495.9	58.0586	0.00430195	-7.86079	1.38058e-05	Yes	0.0121084	Yes	Down
XP_011094589	CDS_11847_Unigene_21725	CDS_9404_Unigene_17129	probable pectate lyase 12	1545.49	2.19089	0.0014176	-9.46233	1.65197e-05	Yes	0.0137642	Yes	Down
XP_011100028	CDS_16662_Unigene_28564	CDS_22639_Unigene_36894	PREDICTED: putative uncharacterized protein At4g01020, chloroplastic	21.9089	4378.49	199.85	7.64277	1.74186e-05	Yes	0.0138221	Yes	Up
XP_012849694	CDS_37002_Unigene_56867	CDS_3700_Unigene_7247	transport SEC31 homolog B	4215.64	20.8135	0.0049372	-7.66209	1.84755e-05	Yes	0.0139944	Yes	Down
XP_011100202	CDS_11795_Unigene_21642	CDS_27159_Unigene_43484	phosphoenolpyruvate carboxylase 1-like	104.98	26904.1	256.278	8.00157	2.35542e-05	Yes	0.0170655	Yes	Up
XP_011086130	CDS_39902_Unigene_62750	CDS_1202_Unigene_2678	vacuolar 8	1778.27	4.38178	0.00246407	-8.66474	2.57802e-05	Yes	0.0179001	Yes	Down
XP_011080360	CDS_39472_Unigene_61675	CDS_32283_Unigene_50867	phospholipase A1- chloroplastic	10.9545	2578.68	235.4	7.87897	3.02506e-05	Yes	0.0201638	Yes	Up
XP_011100772	CDS_26217_Unigene_41678	CDS_4585_Unigene_8939	ubiquitin-conjugating enzyme E2 32-like	5603.2	39.436	0.00703812	-7.15059	3.18067e-05	Yes	0.0203856	Yes	Down
XP_011082867	CDS_38796_Unigene_59782	CDS_4481_Unigene_8772	polyphenol oxidase chloroplastic-like	14947.3	87.6356	0.00586295	-7.41416	3.25975e-05	Yes	0.0201187	Yes	Down
XP_011088308	CDS_1503_Unigene_3248	CDS_33866_Unigene_54278	flavonol synthase flavanone 3-hydroxylase-like	39.2534	5499.13	140.093	7.13024	3.26575e-05	Yes	0.0194359	Yes	Up
XP_012847135	CDS_574_Unigene_1283	CDS_14995_Unigene_25802	NUCLEAR FUSION DEFECTIVE 4-like	15.5188	3057.39	197.012	7.62214	3.27526e-05	Yes	0.0188203	Yes	Up
XP_009794242	CDS_17221_Unigene_29348	CDS_21204_Unigene_34831	ferredoxin--NADP leaf-type chloroplastic	18822.5	100.781	0.00535428	-7.54509	3.33038e-05	Yes	0.0184992	Yes	Down
XP_011069870	CDS_2772_Unigene_6354	CDS_1744_Unigene_3728	EIN3-binding F-box 1	88.5485	13021.6	147.056	7.20022	4.02053e-05	Yes	0.0216123	Yes	Up
XP_011083298	CDS_16276_Unigene_28044	CDS_2254_Unigene_4761	polyphenol oxidase chloroplastic-like	18.2574	3180.08	174.18	7.44444	4.02185e-05	Yes	0.0209438	Yes	Up
XP_011087364	CDS_163_Unigene_401	CDS_11465_Unigene_20544	DNA-damage-repair toleration DRT100-like	6428.44	50.3905	0.00783868	-6.99517	4.02787e-05	Yes	0.0203395	Yes	Down
XP_011078374	CDS_39812_Unigene_62628	CDS_267_Unigene_583	EIN3-binding F-box 1-like	4461.2	31.7679	0.00712093	-7.13372	4.0462e-05	Yes	0.0198311	Yes	Down
XP_011083369	CDS_29563_Unigene_46348	CDS_28940_Unigene_46096	PREDICTED: protein LYK5	12.7802	2550.2	199.543	7.64055	4.35057e-05	Yes	0.0207137	Yes	Up
XP_011098363	CDS_39779_Unigene_62585	CDS_4611_Unigene_8981	PREDICTED: myosin-2-like	3405.01	21.9089	0.00643432	-7.28	4.79121e-05	Yes	0.022178	Yes	Down
Q5SBP5	CDS_16852_Unigene_28822	CDS_10064_Unigene_18171	GCS1_OCIBA ame: Full=Gamma-cadinene synthase ame: Full=(+)-gamma-cadinene synthase	3788.41	26.2907	0.00693976	-7.1709	4.8006e-05	Yes	0.0216209	Yes	Down
AJD25187	CDS_2676_Unigene_6187	CDS_10326_Unigene_18617	cytochrome P450 CYP77A27	52.0336	6075.34	116.758	6.86738	4.97229e-05	Yes	0.0218048	Yes	Up
XP_007042945	CDS_702_Unigene_1684	CDS_6201_Unigene_12138	HXXXD-type acyl-transferase family	12.7802	2457.08	192.257	7.58689	5.01784e-05	Yes	0.0214403	Yes	Up
XP_011092530	CDS_1507_Unigene_3270	CDS_13339_Unigene_23316	methylthioribose kinase	2772.39	16.4317	0.0059269	-7.39851	5.61213e-05	Yes	0.0233801	Yes	Down
XP_012832933	CDS_14662_Unigene_25739	CDS_32598_Unigene_51609	F-box LRR-repeat MAX2 homolog A	30.1247	3891.02	129.164	7.01306	5.81241e-05	Yes	0.0236239	Yes	Up
XP_011087632	CDS_31062_Unigene_48536	CDS_21528_Unigene_35261	chloride channel CLC-c	62.0752	6451.08	103.924	6.69938	6.65737e-05	Yes	0.0264139	Yes	Up
XP_011081428	CDS_2552_Unigene_5919	CDS_32157_Unigene_50718	pre-mRNA-processing-splicing factor 8	161.578	25647.7	158.732	7.31045	6.68222e-05	Yes	0.0258959	Yes	Up
XP_011075207	CDS_21712_Unigene_35539	CDS_26184_Unigene_42106	neutral alpha-glucosidase C	31.9505	3789.14	118.594	6.88989	7.38704e-05	Yes	0.0279767	Yes	Up
XP_011079894	CDS_26797_Unigene_42479	CDS_4302_Unigene_8382	coiled-coil domain-containing 150	3017.04	21.9089	0.00726172	-7.10547	7.62211e-05	Yes	0.0282255	Yes	Down
AAQ10000	CDS_17510_Unigene_29727	CDS_4993_Unigene_9688	fructokinase 2	3270.82	26.2907	0.00803796	-6.95896	8.43768e-05	Yes	0.0305664	Yes	Down
XP_012835781	CDS_37722_Unigene_57842	CDS_11132_Unigene_19963	receptor 12	4279.54	41.6269	0.00972696	-6.68379	9.00325e-05	Yes	0.0319213	Yes	Down
AJD25248	CDS_39035_Unigene_60585	CDS_33855_Unigene_54265	cytochrome P450 CYP716A89	189.877	26158.1	137.763	7.10605	9.4417e-05	Yes	0.0327784	Yes	Up
XP_011081312	CDS_15218_Unigene_26440	CDS_6739_Unigene_12948	PREDICTED: uncharacterized protein LOC105164372	32.8634	3604.01	109.667	6.77698	9.53984e-05	Yes	0.0324432	Yes	Up
XP_011099916	CDS_35242_Unigene_54550	CDS_4820_Unigene_9375	transmembrane 9 superfamily member 3	12697.1	124.881	0.00983536	-6.66781	9.78512e-05	Yes	0.0326118	Yes	Down
XP_011098534	CDS_4662_Unigene_9978	CDS_2355_Unigene_4954	NRT1 PTR FAMILY -like	20.0832	2600.59	129.491	7.01671	0.000106072	Yes	0.0346585	Yes	Up
XP_011098892	CDS_37441_Unigene_57434	CDS_14008_Unigene_24287	ribonucleoside-diphosphate reductase small chain-like	5466.27	64.6313	0.0118236	-6.40218	0.000117018	Yes	0.0374998	Yes	Down
XP_011095827	CDS_35313_Unigene_54645	CDS_5227_Unigene_10152	flavonoid 3 -monooxygenase-like	2496.7	19.718	0.00789762	-6.98437	0.000122264	Yes	0.0384416	Yes	Down
XP_011088856	CDS_31910_Unigene_49717	CDS_31543_Unigene_49832	pleiotropic drug resistance 2-like	88.5485	7259.51	81.9835	6.35726	0.000122886	Yes	0.0379217	Yes	Up
NP_001183546	CDS_26946_Unigene_42688	CDS_15404_Unigene_26441	histone H3	8464.14	101.876	0.0120362	-6.37647	0.000124978	Yes	0.0378661	Yes	Down
EYU20852	CDS_10168_Unigene_19249	CDS_1275_Unigene_2936	hypothetical protein MIMGU_mgv1a005530mg	31.0376	3228.28	104.012	6.7006	0.000126371	Yes	0.0376044	Yes	Up
XP_012828939	CDS_26212_Unigene_41672	CDS_10975_Unigene_19677	callose synthase 9	124.15	10744.1	86.5412	6.43531	0.000127231	Yes	0.0371961	Yes	Up
XP_011091239	CDS_8962_Unigene_17392	CDS_3725_Unigene_7289	pre-mRNA-processing factor 19-like	95.8514	7776.56	81.1314	6.34219	0.00012821	Yes	0.0368361	Yes	Up
XP_011098425	CDS_30183_Unigene_47261	CDS_14635_Unigene_25243	PREDICTED: uncharacterized protein LOC105177096 isoform X3	11162.6	128.167	0.0114818	-6.4445	0.000129271	Yes	0.0365114	Yes	Down
XP_011075684	CDS_23323_Unigene_37683	CDS_19110_Unigene_31640	probable 6-phosphogluconolactonase 2	3344.76	33.9588	0.0101528	-6.62197	0.000138975	Yes	0.038598	Yes	Down
XP_011098287	CDS_11632_Unigene_21368	CDS_2015_Unigene_4368	MATE efflux family LAL5-like	105.893	8390.01	79.231	6.30799	0.000139508	Yes	0.0381108	Yes	Up
XP_012857569	CDS_38304_Unigene_58629	CDS_9313_Unigene_16990	zinc finger BED domain-containing RICESLEEPER 1-like	4085.1	47.1041	0.0115307	-6.43837	0.000143272	Yes	0.0385078	Yes	Down
XP_011102156	CDS_24654_Unigene_39576	CDS_969_Unigene_2075	GDSL esterase lipase At4g18970-like	9056.59	113.926	0.0125794	-6.3128	0.000143645	Yes	0.0379952	Yes	Down
XP_011086346	CDS_39072_Unigene_60630	CDS_32315_Unigene_50901	phosphoglycerate chloroplastic	391.622	143821	367.245	8.5206	0.000144518	Yes	0.0376289	Yes	Up
XP_011073073	CDS_2315_Unigene_5258	CDS_22921_Unigene_37324	acetolactate synthase chloroplastic	170.707	16082.2	94.2096	6.5578	0.000145868	Yes	0.0373963	Yes	Up
XP_011094233	CDS_271_Unigene_581	CDS_7636_Unigene_14426	probable receptor kinase TMK1	2373.46	19.718	0.00830769	-6.91134	0.000147132	Yes	0.0371486	Yes	Down
XP_011070676	CDS_16063_Unigene_27683	CDS_17942_Unigene_30065	ALG-2 interacting X-like	31.9505	3151.6	98.64	6.6241	0.000147637	Yes	0.0367197	Yes	Up
XP_011090789	CDS_20547_Unigene_33835	CDS_5375_Unigene_10566	flavanone 3-dioxygenase-like	2967.74	29.577	0.00996616	-6.64875	0.000157853	Yes	0.0386833	Yes	Down
XP_012836394	CDS_29537_Unigene_46314	CDS_26427_Unigene_42449	glycosyltransferase-like KOBITO 1	27.3861	2810.91	102.64	6.68145	0.000158094	Yes	0.0381808	Yes	Up
AJD25223	CDS_18044_Unigene_30466	CDS_34593_Unigene_55572	cytochrome P450 CYP94D47	16.4317	2061.63	125.467	6.97116	0.000162334	Yes	0.0386448	Yes	Up
XP_011086200	CDS_35232_Unigene_54532	CDS_2506_Unigene_5193	calcium permeable stress-gated cation channel 1-like	7950.19	107.354	0.0135033	-6.21055	0.000163565	Yes	0.0383894	Yes	Down
XP_011095697	CDS_39066_Unigene_60625	CDS_285_Unigene_610	PREDICTED: uncharacterized protein LOC105175073	4351.66	54.7723	0.0125865	-6.31198	0.000164561	Yes	0.0380867	Yes	Down
XP_011086024	CDS_920_Unigene_2179	CDS_5484_Unigene_10806	PREDICTED: uncharacterized protein LOC105167876	4471.24	58.0586	0.0129849	-6.26702	0.000172544	Yes	0.0393873	Yes	Down
XP_011093520	CDS_4301_Unigene_9340	CDS_167_Unigene_386	pre-mRNA-splicing factor SYF1	3628.66	42.7224	0.0117736	-6.4083	0.000175122	Yes	0.0394356	Yes	Down
XP_012854902	CDS_29854_Unigene_46757	CDS_5189_Unigene_10077	PREDICTED: uncharacterized protein LOC105974362 isoform X2	2108.73	17.5271	0.00831169	-6.91064	0.000176812	Yes	0.0392853	Yes	Down
XP_011078273	CDS_39403_Unigene_61579	CDS_6516_Unigene_12599	CRS2-associated factor chloroplastic	40.1663	3428.74	85.3636	6.41555	0.000183638	Yes	0.040265	Yes	Up
XP_011091205	CDS_17980_Unigene_30369	CDS_6016_Unigene_11849	poly(A) RNA polymerase 1-like	3509.99	41.6269	0.0118596	-6.39781	0.00018619	Yes	0.0402944	Yes	Down
XP_011070276	CDS_21036_Unigene_34533	CDS_25796_Unigene_41537	PREDICTED: LOW QUALITY PROTEIN: uncharacterized protein LOC105155975	95.8514	6552.95	68.3657	6.0952	0.000192225	Yes	0.0410671	Yes	Up
EYU18730	CDS_16082_Unigene_27720	CDS_3804_Unigene_7401	hypothetical protein MIMGU_mgv1a000667mg	257.43	0	0	-Inf	0.000193388	Yes	0.0407926	Yes	Up
XP_011097782	CDS_16885_Unigene_28895	CDS_3130_Unigene_6271	kinesin KIN12A isoform X1	1912.46	16.4317	0.00859189	-6.86281	0.000219822	Yes	0.0457889	Yes	Down
XP_012832087	CDS_7143_Unigene_14242	CDS_4926_Unigene_9593	fructose-1,6- chloroplastic-like	6087.94	94.2083	0.0154746	-6.01396	0.00022303	Yes	0.0458836	Yes	Down
XP_011096413	CDS_1269_Unigene_2763	CDS_19619_Unigene_32371	magnesium-chelatase subunit chloroplastic-like	17350.9	219.089	0.0126269	-6.30735	0.000236796	Yes	0.0481216	Yes	Down
AKN09620	CDS_39149_Unigene_60733	CDS_18216_Unigene_30407	basic helix-loop-helix transcription factor	115.022	7268.28	63.1905	5.98164	0.000237648	Yes	0.0477128	Yes	Up
XP_011069526	CDS_2779_Unigene_6361	CDS_33191_Unigene_52736	chlorophyllide a chloroplastic-like	214.525	16435	76.6111	6.25948	0.000244378	Yes	0.0484799	Yes	Up
XP_012854590	CDS_6476_Unigene_13057	CDS_5307_Unigene_10372	SNF1-related kinase regulatory subunit gamma-1	6168.27	99.6855	0.016161	-5.95134	0.000248686	Yes	0.0487544	Yes	Down
XP_011100311	CDS_38070_Unigene_58304	CDS_31947_Unigene_50411	probable histone-lysine N-methyltransferase ATXR3 isoform X2	41.0792	3187.75	77.6	6.27798	0.000252227	Yes	0.0488734	Yes	Up
XP_011094520	CDS_11320_Unigene_20956	CDS_12162_Unigene_21579	armadillo repeat-containing kinesin 1 isoform X2	3747.34	52.5814	0.0140317	-6.15517	0.000254006	Yes	0.0486524	Yes	Down
ADO16250	CDS_8405_Unigene_16456	CDS_24207_Unigene_39205	p-coumaroyl shikimate 3 -hydroxylase	172.533	11441.9	66.3175	6.05132	0.000257962	Yes	0.0488486	Yes	Up
XP_011070424	CDS_1678_Unigene_3880	CDS_33715_Unigene_53724	PREDICTED: uncharacterized protein LOC105156082	1.82574	600.304	328.8	8.36107	0.000263758	Yes	0.049385	Yes	Up
XP_011072684	CDS_34987_Unigene_54168	CDS_2944_Unigene_5872	1-phosphatidylinositol-3-phosphate 5-kinase FAB1B-like	2495.79	28.4816	0.0114119	-6.45332	0.000269705	Yes	0.0499374	Yes	Down
XP_011069930	CDS_37470_Unigene_57483	CDS_31283_Unigene_49457	plasma membrane ATPase 4	78.5069	4849.54	61.7721	5.94888	0.000273285	Yes	0.0500442	Yes	Up
XP_011078373	CDS_17884_Unigene_30234	CDS_15014_Unigene_25833	phospholipase D alpha 1-like	13467.6	198.276	0.0147224	-6.08584	0.000277346	Yes	0.0502358	Yes	Down
XP_011076386	CDS_1652_Unigene_3795	CDS_13471_Unigene_23527	leucine-rich repeat receptor kinase TDR	27.3861	2362.88	86.28	6.43095	0.000293973	Yes	0.0526749	No	Up
XP_011073515	CDS_40463_Unigene_64093	CDS_471_Unigene_1016	1-aminocyclopropane-1-carboxylate oxidase homolog 1-like	44.7307	3195.41	71.4367	6.15859	0.000304334	Yes	0.0539513	No	Up
XP_011073820	CDS_38419_Unigene_58793	CDS_32815_Unigene_51892	probably inactive leucine-rich repeat receptor kinase At3g28040	149.711	8661.68	57.8561	5.8544	0.000312182	Yes	0.05476	No	Up
XP_011079781	CDS_9848_Unigene_18738	CDS_32652_Unigene_51694	sugar transporter ERD6-like 7	136.931	7799.57	56.96	5.83188	0.000313919	Yes	0.0544911	No	Up
XP_011092371	CDS_37792_Unigene_57922	CDS_32170_Unigene_50740	mediator of RNA polymerase II transcription subunit 12 isoform X1	53.8594	3571.15	66.3051	6.05105	0.000315399	Yes	0.0541836	No	Up
XP_011084497	CDS_30072_Unigene_47080	CDS_14206_Unigene_24607	cyclic nucleotide-gated ion channel 1-like	221.828	14209	64.0543	6.00122	0.000333754	Yes	0.0567518	No	Up
XP_011096786	CDS_3503_Unigene_7669	CDS_3433_Unigene_6834	vesicle-associated membrane 721-like	2454.71	30.6725	0.0124954	-6.32246	0.000335735	Yes	0.056512	No	Down
XP_011094432	CDS_3959_Unigene_8619	CDS_11567_Unigene_20710	PREDICTED: uncharacterized protein LOC105174131	2387.16	29.577	0.0123901	-6.33467	0.000342159	Yes	0.0570174	No	Down
XP_011094242	CDS_1618_Unigene_3662	CDS_22260_Unigene_36322	trafficking particle complex subunit 8	32.8634	2534.86	77.1333	6.26928	0.000342194	Yes	0.0564586	No	Up
XP_011074134	CDS_181_Unigene_427	CDS_7740_Unigene_14594	PREDICTED: laccase-14-like	5553.91	101.876	0.0183432	-5.76861	0.000348542	Yes	0.0569424	No	Down
XP_011085084	CDS_39618_Unigene_61902	CDS_32377_Unigene_50968	protoheme IX mitochondrial	50.2079	3269.9	65.1273	6.02519	0.000366306	Yes	0.0592633	No	Up
XP_011080114	CDS_6360_Unigene_12871	CDS_5209_Unigene_10116	PREDICTED: uncharacterized protein LOC105163461	181.661	10101.1	55.604	5.79712	0.000370298	Yes	0.0593331	No	Up
XP_011089458	CDS_2655_Unigene_6136	CDS_32805_Unigene_51881	probable phosphatase 2C 4	62.9881	3747.52	59.4957	5.89471	0.000385223	Yes	0.0611367	No	Up
XP_011079085	CDS_18971_Unigene_31676	CDS_28187_Unigene_45035	transcription factor PCL1	227.305	13459.7	59.2145	5.88788	0.000386681	Yes	0.0607892	No	Up
XP_011082534	CDS_14108_Unigene_24911	CDS_8650_Unigene_15969	piezo-type mechanosensitive ion channel homolog isoform X2	20.996	1855.68	88.3826	6.46569	0.000389187	Yes	0.0606113	No	Up
XP_011091509	CDS_35609_Unigene_55025	CDS_27033_Unigene_43336	phosphatase 2C 37-like	42.9049	2894.17	67.4553	6.07586	0.000391978	Yes	0.0604808	No	Up
XP_011082006	CDS_4562_Unigene_9789	CDS_22446_Unigene_36592	TIC chloroplastic	13.6931	1435.03	104.8	6.71149	0.000395811	Yes	0.0605119	No	Up
XP_011080509	CDS_12132_Unigene_22127	CDS_1385_Unigene_3170	PREDICTED: uncharacterized protein LOC105163756	578.76	2.19089	0.00378549	-8.0453	0.000399356	Yes	0.0604988	No	Down
XP_011077109	CDS_10069_Unigene_19075	CDS_2062_Unigene_4435	late blight resistance homolog R1B-14	37.4277	2624.69	70.1268	6.13189	0.00040435	Yes	0.0607035	No	Up
XP_011095651	CDS_6398_Unigene_12934	CDS_6385_Unigene_12412	PREDICTED: uncharacterized protein LOC105175040 isoform X1	1874.12	21.9089	0.0116902	-6.41856	0.000421409	Yes	0.0626996	No	Down
XP_011093340	CDS_39805_Unigene_62616	CDS_7572_Unigene_14278	receptor kinase HSL1	26.4733	2084.63	78.7448	6.29911	0.000423017	Yes	0.0623819	No	Up
XP_011090662	CDS_28608_Unigene_45046	CDS_18754_Unigene_31144	PREDICTED: uncharacterized protein LOC105171293	51.1208	3173.5	62.0786	5.95602	0.000424399	Yes	0.0620367	No	Up
XP_011094989	CDS_24082_Unigene_38746	CDS_17353_Unigene_29168	auxin transporter 2	83.9841	4455.18	53.0478	5.72922	0.000426025	Yes	0.0617329	No	Up
XP_011099420	CDS_15876_Unigene_27422	CDS_8109_Unigene_15153	homeobox-leucine zipper HAT22-like	3193.22	51.4859	0.0161235	-5.95469	0.000427491	Yes	0.0614113	No	Down
XP_012855821	CDS_10499_Unigene_19755	CDS_7747_Unigene_14614	nuclear mitotic apparatus 1	28.299	2161.31	76.3742	6.25501	0.000430379	Yes	0.0612977	No	Up
XP_011098459	CDS_521_Unigene_1183	CDS_2466_Unigene_5133	probable monodehydroascorbate cytoplasmic isoform 2	6352.67	128.167	0.0201753	-5.63127	0.000434854	Yes	0.0614102	No	Down
XP_012434520	CDS_37592_Unigene_57681	CDS_20613_Unigene_33931	probable disease resistance RF9	2112.38	27.3861	0.0129646	-6.26928	0.000443734	Yes	0.0621377	No	Down
XP_011090906	CDS_5714_Unigene_11824	CDS_8644_Unigene_15963	PREDICTED: uncharacterized protein LOC105171472 isoform X1	48.3822	3017.95	62.3774	5.96295	0.000445688	Yes	0.0618912	No	Up
XP_011099195	CDS_24621_Unigene_39514	CDS_4328_Unigene_8454	probable LRR receptor-like serine threonine- kinase At3g47570	1881.43	23.0043	0.0122271	-6.35378	0.000459304	Yes	0.0632549	No	Down
XP_011095609	CDS_34523_Unigene_53545	CDS_23718_Unigene_38433	enhancer of mRNA-decapping 4-like	181.661	9060.43	49.8754	5.64026	0.000461557	Yes	0.0630441	No	Up
AKV71967	CDS_17053_Unigene_29118	CDS_25278_Unigene_40818	telomere repeat-binding factor like-	5004.36	101.876	0.0203575	-5.61829	0.000475268	Yes	0.0643892	No	Down
XP_011087987	CDS_11792_Unigene_21635	CDS_4572_Unigene_8917	myb-binding 1A	2399.94	35.0542	0.0146063	-6.09726	0.00048489	Yes	0.065163	No	Down
XP_011096686	CDS_848_Unigene_2069	CDS_8838_Unigene_16288	receptor kinase HAIKU2	196.267	9718.79	49.5181	5.62989	0.000485012	Yes	0.0646579	No	Up
XP_011080258	CDS_9341_Unigene_17993	CDS_1119_Unigene_2430	PREDICTED: uncharacterized protein LOC105163554	213.612	10805.5	50.5846	5.66063	0.000487036	Yes	0.0644124	No	Up
EYU38455	CDS_11700_Unigene_21471	CDS_19081_Unigene_31584	hypothetical protein MIMGU_mgv1a023633mg	119.586	5651.4	47.258	5.56249	0.000492903	Yes	0.0646751	No	Up
XP_011095559	CDS_35445_Unigene_54828	CDS_1050_Unigene_2249	E3 ubiquitin- ligase UPL1-like	2504.92	38.3406	0.0153061	-6.02975	0.000509021	Yes	0.0662682	No	Down
XP_012842600	CDS_17462_Unigene_29669	CDS_23727_Unigene_38443	PREDICTED: uncharacterized protein LOC105962815 isoform X1	52.9465	3082.58	58.2207	5.86346	0.000509141	Yes	0.06577	No	Up
XP_011094756	CDS_3918_Unigene_8544	CDS_16721_Unigene_28287	glutathione S-transferase L3-like	2352.47	35.0542	0.014901	-6.06844	0.000519205	Yes	0.0665541	No	Down
XP_011100244	CDS_12341_Unigene_22410	CDS_27734_Unigene_44356	probable transcription factor GLK1	7648.03	164.317	0.0214848	-5.54054	0.000521752	Yes	0.06637	No	Down
XP_011085122	CDS_16194_Unigene_27929	CDS_10256_Unigene_18508	eukaryotic translation initiation factor 3 subunit B-like	13113.4	261.811	0.0199652	-5.64637	0.000571089	Yes	0.0720958	No	Down
XP_011079236	CDS_2674_Unigene_6185	CDS_7868_Unigene_14800	histone-lysine N- H3 lysine-9 specific SUVH1-like	30.1247	2050.67	68.0727	6.08901	0.000587969	Yes	0.0736685	No	Up
XP_012856795	CDS_37569_Unigene_57642	CDS_31409_Unigene_49631	phospholipid-transporting ATPase 4	46.5564	2712.32	58.2588	5.8644	0.000588373	Yes	0.073169	No	Up
XP_011079338	CDS_29367_Unigene_46104	CDS_28508_Unigene_45480	ECERIFERUM 3-like	118.673	5262.52	44.3446	5.47069	0.000592907	Yes	0.0731867	No	Up
XP_011082869	CDS_26975_Unigene_42735	CDS_16291_Unigene_27701	tyrosine--tRNA cytoplasmic-like	3562.94	70.1085	0.0196772	-5.66733	0.000597472	Yes	0.0732079	No	Down
XP_011070876	CDS_29720_Unigene_46560	CDS_4197_Unigene_8103	PREDICTED: uncharacterized protein LOC105156446	1582.01	19.718	0.0124639	-6.3261	0.000601354	Yes	0.0731457	No	Down
XP_012851258	CDS_20217_Unigene_33376	CDS_12801_Unigene_22523	organic cation carnitine transporter 7-like	791.459	5.47723	0.00692042	-7.17493	0.000605672	Yes	0.0731371	No	Down
XP_011080864	CDS_13081_Unigene_23421	CDS_12_Unigene_30	trithorax group osa-like	1965.41	28.4816	0.0144914	-6.10866	0.000615106	Yes	0.0737419	No	Down
XP_011094656	CDS_2048_Unigene_4655	CDS_15556_Unigene_26606	29 kDa ribonucleo chloroplastic	31084.2	485.282	0.0156119	-6.00121	0.000631121	Yes	0.0751214	No	Down
XP_012834310	CDS_34870_Unigene_54054	CDS_30942_Unigene_49002	PREDICTED: uncharacterized protein LOC105955154	0.912871	62.4404	68.4	6.09592	0.000643472	Yes	0.0760484	No	Up
XP_011080886	CDS_33390_Unigene_51994	CDS_28060_Unigene_44853	PREDICTED: uncharacterized protein LOC105164037	179.836	7671.4	42.6579	5.41474	0.000647788	Yes	0.0760193	No	Up
XP_011085147	CDS_22845_Unigene_37070	CDS_19720_Unigene_32497	ECERIFERUM 1-like	312.202	15650.6	50.1298	5.6476	0.00065036	Yes	0.0757874	No	Up
XP_011080134	CDS_35416_Unigene_54794	CDS_12213_Unigene_21658	receptor-like serine threonine- kinase ALE2 isoform X1	3043.51	58.0586	0.0190762	-5.71208	0.000664288	Yes	0.0768729	No	Down
XP_011091187	CDS_3214_Unigene_7149	CDS_9233_Unigene_16890	1-aminocyclopropane-1-carboxylate oxidase homolog 3-like	5462.62	130.358	0.0238636	-5.38904	0.000676003	Yes	0.0776891	No	Down
XP_011088209	CDS_26442_Unigene_41998	CDS_5697_Unigene_11234	probable LRR receptor-like serine threonine- kinase At4g37250	1993.71	30.6725	0.0153846	-6.02237	0.000684114	Yes	0.0780827	No	Down
XP_012830901	CDS_171_Unigene_412	CDS_4288_Unigene_8350	PAT1 homolog 1	201.744	8521.47	42.2389	5.4005	0.000684173	Yes	0.0775582	No	Up
XP_011081684	CDS_19399_Unigene_32297	CDS_13036_Unigene_22862	glycine dehydrogenase (decarboxylating) mitochondrial	35304.4	553.2	0.0156694	-5.9959	0.000714046	Yes	0.0803977	No	Down
XP_012841259	CDS_15479_Unigene_26842	CDS_4079_Unigene_7839	amino acid permease 6-like	3378.54	70.1085	0.0207511	-5.59067	0.0007173	Yes	0.0802222	No	Down
XP_011095583	CDS_326_Unigene_698	CDS_3388_Unigene_6766	PREDICTED: uncharacterized protein LOC105174992	1679.68	24.0998	0.0143478	-6.12302	0.000735958	Yes	0.08176	No	Down
XP_012842502	CDS_10970_Unigene_20425	CDS_1964_Unigene_4278	PREDICTED: uncharacterized protein LOC105962724	19.1703	1442.7	75.2571	6.23376	0.000745268	Yes	0.082246	No	Up
XP_011100511	CDS_4076_Unigene_8890	CDS_2376_Unigene_4981	uncharacterized aarF domain-containing kinase chloroplastic	2741.35	52.5814	0.0191808	-5.70419	0.000754832	Yes	0.0827534	No	Down
XP_011098625	CDS_710_Unigene_1723	CDS_4083_Unigene_7850	zinc-finger homeodomain 9-like	8091.69	204.848	0.0253159	-5.30381	0.000798585	Yes	0.0869779	No	Down
XP_011081599	CDS_17875_Unigene_30229	CDS_8711_Unigene_16059	PREDICTED: uncharacterized protein LOC105164608	61.1624	2966.47	48.5015	5.59996	0.000807153	Yes	0.0873404	No	Up
XP_011076173	CDS_22788_Unigene_36983	CDS_14348_Unigene_24836	leucine-rich repeat-containing DDB_G0290503	1874.12	30.6725	0.0163663	-5.93313	0.000839498	Yes	0.0902542	No	Down
XP_011093013	CDS_1370_Unigene_2981	CDS_33993_Unigene_54439	calcium-binding KIC-like	95.8514	3987.42	41.6	5.37851	0.000848949	Yes	0.0906853	No	Up
XP_011092747	CDS_6419_Unigene_12957	CDS_33840_Unigene_54252	ferric reduction oxidase 2-like isoform X1	81.2455	3538.29	43.5506	5.44462	0.000857488	Yes	0.0910139	No	Up
XP_011099231	CDS_10563_Unigene_19828	CDS_7894_Unigene_14828	probable leucine-rich repeat receptor kinase At5g63930	20.996	1455.85	69.3391	6.1156	0.000865291	Yes	0.0912608	No	Up
CDP04650	CDS_14954_Unigene_26099	CDS_21404_Unigene_35105	unnamed protein product	18.2574	1323.3	72.48	6.17951	0.000888914	Yes	0.0931627	No	Up
XP_011088350	CDS_14445_Unigene_25422	CDS_1146_Unigene_2518	mediator of RNA polymerase II transcription subunit 13	76.6812	3348.78	43.6714	5.44862	0.000902559	Yes	0.0940015	No	Up
XP_011086553	CDS_17022_Unigene_29077	CDS_3780_Unigene_7366	methyl- -binding domain-containing 9-like	30.1247	1792.15	59.4909	5.8946	0.000918948	Yes	0.095114	No	Up
XP_011088091	CDS_3716_Unigene_8044	CDS_2105_Unigene_4493	ankyrin repeat domain-containing 6	46.5564	2372.73	50.9647	5.67143	0.000921136	Yes	0.0947519	No	Up
XP_011089012	CDS_1193_Unigene_2651	CDS_31757_Unigene_50169	lysosomal beta glucosidase-like	19436.8	421.746	0.0216983	-5.52627	0.000928448	Yes	0.0949181	No	Down
EYU38400	CDS_37712_Unigene_57832	CDS_29933_Unigene_47582	hypothetical protein MIMGU_mgv1a023263mg	272.036	10433	38.3517	5.26122	0.000948719	Yes	0.0963992	No	Up
XP_011088367	CDS_38052_Unigene_58279	CDS_32071_Unigene_50596	phosphatidylinositol 4-kinase alpha 1-like	4082.36	104.067	0.0254919	-5.29381	0.000962351	Yes	0.0971916	No	Down
XP_011088448	CDS_34535_Unigene_53565	CDS_28864_Unigene_45994	SUMO-activating enzyme subunit 2	3252.56	75.5857	0.0232388	-5.42732	0.000971046	Yes	0.097479	No	Down
XP_011095808	CDS_6861_Unigene_13738	CDS_2060_Unigene_4433	cleavage and polyadenylation specificity factor subunit 6	128.715	4750.95	36.9106	5.20596	0.000986887	Yes	0.098476	No	Up
XP_011100914	CDS_7967_Unigene_15768	CDS_17244_Unigene_29023	systemin receptor SR160-like	133.279	4881.3	36.6247	5.19474	0.000989593	Yes	0.0981583	No	Up
XP_011075439	CDS_17018_Unigene_29072	CDS_11325_Unigene_20297	alpha-xylosidase 2	254.691	9389.06	36.8645	5.20416	0.000996497	Yes	0.0982581	No	Up
XP_011098140	CDS_36809_Unigene_56574	CDS_30164_Unigene_47915	PREDICTED: uncharacterized protein LOC105176896	104.98	4048.77	38.567	5.26929	0.00100369	Yes	0.0983851	No	Up
XP_011073557	CDS_30911_Unigene_48321	CDS_30239_Unigene_48005	PREDICTED: uncharacterized protein LOC105158471, partial	1345.57	19.718	0.014654	-6.09256	0.00100462	Yes	0.0979009	No	Down
XP_011090678	CDS_15993_Unigene_27591	CDS_3722_Unigene_7287	vestitone reductase-like	2912.06	65.7267	0.0225705	-5.46942	0.0010205	Yes	0.0988702	No	Down
XP_011073451	CDS_10862_Unigene_20283	CDS_5081_Unigene_9844	calcium-dependent kinase 3-like	5003.45	139.122	0.0278051	-5.1685	0.00102552	Yes	0.0987822	No	Down
XP_012844644	CDS_4552_Unigene_9773	CDS_3793_Unigene_7385	LRR receptor-like serine threonine- kinase FLS2	83.0713	3384.93	40.7473	5.34863	0.00104869	Yes	0.100433	No	Up
XP_011072000	CDS_22401_Unigene_36514	CDS_9024_Unigene_16605	probable galactinol--sucrose galactosyltransferase 2	2145.25	42.7224	0.0199149	-5.65001	0.00108004	Yes	0.102844	No	Down
XP_011083993	CDS_38933_Unigene_60054	CDS_15162_Unigene_26075	CBL-interacting serine threonine- kinase 6-like	48.3822	2305.91	47.6604	5.57472	0.00110048	Yes	0.104195	No	Up
XP_011101185	CDS_12006_Unigene_21970	CDS_4253_Unigene_8260	IQ-DOMAIN 14-like	7979.4	230.043	0.0288297	-5.1163	0.00110061	Yes	0.103619	No	Down
XP_012853332	CDS_18878_Unigene_31554	CDS_16039_Unigene_27346	grpE mitochondrial	333.198	12540.7	37.6373	5.23409	0.00110822	Yes	0.103749	No	Up
XP_011077135	CDS_2750_Unigene_6322	CDS_16092_Unigene_27414	translational activator GCN1	192.616	6537.62	33.9412	5.08497	0.00112181	Yes	0.104434	No	Up
XP_011086421	CDS_11326_Unigene_20965	CDS_13453_Unigene_23506	probable xyloglucan endotransglucosylase hydrolase 30	255.604	8907.06	34.8471	5.12297	0.00112304	Yes	0.103968	No	Up
XP_011087728	CDS_12928_Unigene_23206	CDS_1283_Unigene_2962	serine hydroxymethyltransferase 6-like	1465.16	24.0998	0.0164486	-5.92589	0.00113712	Yes	0.104691	No	Down
XP_012843590	CDS_33534_Unigene_52164	CDS_21770_Unigene_35648	PREDICTED: transketolase, chloroplastic	417.182	16747.2	40.1435	5.3271	0.00115808	Yes	0.106035	No	Up
XP_011075878	CDS_25399_Unigene_40574	CDS_22852_Unigene_37242	PREDICTED: uncharacterized protein LOC105160266 isoform X1	158.84	5355.63	33.7172	5.07541	0.00116273	Yes	0.105878	No	Up
XP_011098245	CDS_14326_Unigene_25227	CDS_24286_Unigene_39344	malate mitochondrial	283.903	9918.16	34.935	5.1266	0.001166	Yes	0.105599	No	Up
XP_011096162	CDS_23569_Unigene_38057	CDS_23537_Unigene_38233	cysteine-rich receptor kinase 10	8565.47	250.857	0.029287	-5.0936	0.0011681	Yes	0.105217	No	Down
XP_011077208	CDS_6781_Unigene_13621	CDS_204_Unigene_439	scarecrow 14	37.4277	1912.65	51.1024	5.67532	0.00116873	Yes	0.104709	No	Up
ACA64046	CDS_7613_Unigene_15095	CDS_3248_Unigene_6522	cytochrome P450 monooxygenase CS3`H	189.877	6334.96	33.3635	5.0602	0.00116888	Yes	0.104162	No	Up
XP_011076719	CDS_12613_Unigene_22796	CDS_4355_Unigene_8494	60S acidic ribosomal P0	21896.1	509.382	0.0232636	-5.42578	0.00118625	Yes	0.105147	No	Down
EYU31736	CDS_33520_Unigene_52144	CDS_31749_Unigene_50159	hypothetical protein MIMGU_mgv1a023294mg	868.14	53096.2	61.1609	5.93454	0.00118941	Yes	0.104869	No	Up
XP_011075371	CDS_18312_Unigene_30822	CDS_31459_Unigene_49707	probable inactive purple acid phosphatase 16	6314.33	190.607	0.0301865	-5.04995	0.00119319	Yes	0.104649	No	Down
XP_011083846	CDS_7964_Unigene_15764	CDS_799_Unigene_1819	chlorophyll a-b binding chloroplastic	7365.96	221.28	0.0300409	-5.05693	0.00119854	Yes	0.104568	No	Down
XP_012836951	CDS_34819_Unigene_53989	CDS_27695_Unigene_44302	probable quinone oxidoreductase	120.499	4243.75	35.2182	5.13825	0.00119988	Yes	0.10414	No	Up
XP_011085498	CDS_10778_Unigene_20145	CDS_4751_Unigene_9236	PREDICTED: uncharacterized protein LOC105167458	796.023	8.76356	0.0110092	-6.50515	0.00123014	Yes	0.106212	No	Down
AKA27892	CDS_6064_Unigene_12382	CDS_7639_Unigene_14431	WRKY protein	1424.99	24.0998	0.0169122	-5.88579	0.00123911	Yes	0.106435	No	Down
AKA27895	CDS_6944_Unigene_13847	CDS_14053_Unigene_24356	WRKY protein	51.1208	2300.43	45	5.49185	0.00125004	Yes	0.106824	No	Up
XP_011072055	CDS_22653_Unigene_36803	CDS_23259_Unigene_37818	bifunctional dTDP-4-dehydrorhamnose 3,5-epimerase dTDP-4-dehydrorhamnose reductase	5700.88	175.271	0.0307446	-5.02352	0.00125498	Yes	0.106699	No	Down
XP_011086568	CDS_28638_Unigene_45081	CDS_4582_Unigene_8936	2-methylene-furan-3-one reductase-like	6173.75	190.607	0.0308739	-5.01747	0.00126132	Yes	0.106694	No	Down
XP_011070094	CDS_6912_Unigene_13799	CDS_27495_Unigene_44009	probable clathrin assembly At4g32285	40.1663	1952.08	48.6	5.60288	0.00126925	Yes	0.106822	No	Up
XP_011073157	CDS_16778_Unigene_28732	CDS_12346_Unigene_21879	monoglyceride lipase-like	1644.08	30.6725	0.0186563	-5.74419	0.00127887	Yes	0.107091	No	Down
XP_011073908	CDS_24304_Unigene_39058	CDS_19095_Unigene_31613	2-isopropylmalate synthase A-like	195.354	6258.28	32.0355	5.0016	0.00129297	Yes	0.10773	No	Up
ABP96842	CDS_35127_Unigene_54373	CDS_28589_Unigene_45583	4-diphosphocytidyl-2-C-methyl-D-erythritol kinase	2183.59	48.1996	0.0220736	-5.50154	0.00131895	Yes	0.109348	No	Down
XP_011085713	CDS_14008_Unigene_24746	CDS_10911_Unigene_19569	cyclic nucleotide-gated ion channel 2-like	27.3861	1496.38	54.64	5.77189	0.00134263	Yes	0.11076	No	Up
XP_011097825	CDS_29679_Unigene_46508	CDS_20948_Unigene_34449	PREDICTED: syntaxin-51-like	2235.62	50.3905	0.0225398	-5.47138	0.00134455	Yes	0.110373	No	Down
XP_011096446	CDS_25865_Unigene_41172	CDS_21861_Unigene_35757	auxin response factor 3	42.9049	1997	46.5447	5.54054	0.00135589	Yes	0.110758	No	Up
XP_011082310	CDS_16090_Unigene_27742	CDS_11939_Unigene_21262	transcription factor HBP-1a-like isoform X2	75.7683	2936.89	38.7614	5.27655	0.00135773	Yes	0.110366	No	Up
XP_012829590	CDS_10387_Unigene_19585	CDS_26431_Unigene_42454	tyrosine- kinase CSK-like	39.2534	1880.88	47.9163	5.58244	0.00136236	Yes	0.110206	No	Up
XP_011093464	CDS_345_Unigene_751	CDS_6720_Unigene_12915	ABC transporter C family member 15	18.2574	1153.5	63.18	5.9814	0.00136781	Yes	0.110112	No	Up
XP_012843823	CDS_16737_Unigene_28678	CDS_14049_Unigene_24353	hydroquinone glucosyltransferase-like	245.562	7663.73	31.2089	4.96389	0.00141525	Yes	0.113383	No	Up
XP_011070569	CDS_37513_Unigene_57559	CDS_31956_Unigene_50422	nuclear pore complex NUP155	83.9841	3107.78	37.0043	5.20962	0.00142742	Yes	0.113811	No	Up
XP_010550770	CDS_31168_Unigene_48660	CDS_1802_Unigene_3855	tubulin beta-8 chain-like	6772.59	221.28	0.0326729	-4.93576	0.00146006	Yes	0.115859	No	Down
XP_011074258	CDS_16201_Unigene_27944	CDS_15597_Unigene_26673	F-box kelch-repeat SKIP25-like	47.4693	2080.25	43.8231	5.45362	0.00147421	Yes	0.116428	No	Up
XP_012854855	CDS_10755_Unigene_20108	CDS_25357_Unigene_40934	NRT1 PTR FAMILY -like	137.844	4392.73	31.8675	4.99402	0.00148759	Yes	0.11693	No	Up
XP_012844429	CDS_34681_Unigene_53761	CDS_22222_Unigene_36275	probable leucine-rich repeat receptor kinase partial	4.56435	443.655	97.2	6.60288	0.00151423	Yes	0.118465	No	Up
XP_011099341	CDS_28171_Unigene_44457	CDS_3710_Unigene_7265	metal transporter Nramp3	1432.29	128251	89.5426	6.4845	0.00152027	Yes	0.118382	No	Up
XP_012834406	CDS_33755_Unigene_52502	CDS_24280_Unigene_39336	gamma-tubulin complex component 3	32.8634	1603.73	48.8	5.60881	0.00156159	Yes	0.121034	No	Up
XP_011070588	CDS_28478_Unigene_44904	CDS_22833_Unigene_37208	glucan endo-1,3-beta-glucosidase 3	10.9545	811.725	74.1	6.2114	0.00161017	Yes	0.124222	No	Up
XP_011085895	CDS_17728_Unigene_30050	CDS_15019_Unigene_25840	benzyl alcohol O-benzoyltransferase-like	257.43	7531.19	29.2553	4.87063	0.00165595	Yes	0.127165	No	Up
XP_011072007	CDS_10439_Unigene_19668	CDS_7235_Unigene_13751	BTB POZ and TAZ domain-containing 1	1840.35	41.6269	0.022619	-5.46632	0.00167154	Yes	0.127773	No	Down
XP_011084110	CDS_21809_Unigene_35683	CDS_14826_Unigene_25545	probable galactinol--sucrose galactosyltransferase 6	1096.36	61696.6	56.2741	5.8144	0.00167825	Yes	0.1277	No	Up
XP_011078470	CDS_26417_Unigene_41964	CDS_26519_Unigene_42597	squalene monooxygenase-like	62.9881	2416.55	38.3652	5.26173	0.00168216	Yes	0.127416	No	Up
XP_011078221	CDS_11378_Unigene_21030	CDS_33222_Unigene_52767	zinc finger CCCH domain-containing 20-like	165.23	4872.54	29.4895	4.88213	0.00168414	Yes	0.126989	No	Up
XP_011070965	CDS_17144_Unigene_29246	CDS_905_Unigene_1987	ERAD-associated E3 ubiquitin- ligase HRD1B-like	161.578	4779.43	29.5797	4.88653	0.00168897	Yes	0.126779	No	Up
Q6TXD2	CDS_7214_Unigene_14382	CDS_4365_Unigene_8521	5MAT2_SALSN ame: Full=Pelargonidin 3-O-(6-caffeoylglucoside) 5-O-(6-O-malonylglucoside) 4 -malonyltransferase ame: Full=Anthocyanin 5-O-glucoside-4 -O-malonyltransferase 2 Short=Ss5 2	104.98	3439.7	32.7652	5.03409	0.00171368	Yes	0.128057	No	Up
XP_011083338	CDS_1132_Unigene_2541	CDS_20145_Unigene_33194	NF-X1-type zinc finger NFXL1	52.9465	2133.93	40.3034	5.33283	0.00171616	Yes	0.12767	No	Up
XP_011072662	CDS_34442_Unigene_53414	CDS_1539_Unigene_3425	PREDICTED: uncharacterized protein LOC105157864 isoform X1	36.5148	1658.5	45.42	5.50526	0.00174273	Yes	0.12907	No	Up
XP_012839050	CDS_20260_Unigene_33432	CDS_4412_Unigene_8628	UDP-glycosyltransferase 74E2-like	2635.46	72.2994	0.0274333	-5.18793	0.00174355	Yes	0.12856	No	Down
XP_011096981	CDS_1788_Unigene_4228	CDS_33490_Unigene_53446	PREDICTED: uncharacterized protein LOC105176008	60.2495	2315.77	38.4364	5.2644	0.00174862	Yes	0.128366	No	Up
ADD91751	CDS_26507_Unigene_42092	CDS_17956_Unigene_30090	S-adenosylmethionine decarboxylase proenzyme	209.047	5897.88	28.2131	4.81829	0.00177332	Yes	0.129608	No	Up
AAL99201	CDS_20795_Unigene_34166	CDS_24208_Unigene_39206	p-coumaroyl shikimate 3 -hydroxylase isoform 2	3438.78	106.258	0.0308999	-5.01625	0.00177388	Yes	0.129083	No	Down
XP_012835311	CDS_3069_Unigene_6891	CDS_16742_Unigene_28313	L-ascorbate oxidase homolog	56.598	2208.42	39.0194	5.28612	0.00177602	Yes	0.128676	No	Up
XP_011082828	CDS_19736_Unigene_32770	CDS_534_Unigene_1172	leucine-rich repeat receptor-like serine threonine- kinase At1g17230	222.741	6271.42	28.1557	4.81536	0.00178259	Yes	0.128594	No	Up
XP_009363490	CDS_17217_Unigene_29344	CDS_21207_Unigene_34833	ferredoxin--NADP leaf chloroplastic	2785.17	79.9675	0.0287119	-5.12221	0.00183079	Yes	0.131501	No	Down
XP_011088570	CDS_38288_Unigene_58609	CDS_342_Unigene_748	dirigent 21-like	33482.3	823.775	0.0246033	-5.345	0.00183491	Yes	0.131232	No	Down
XP_012837197	CDS_3510_Unigene_7685	CDS_10451_Unigene_18873	trafficking particle complex subunit 2	23.7346	1227.99	51.7385	5.69317	0.0018491	Yes	0.131681	No	Up
XP_011078689	CDS_2442_Unigene_5664	CDS_6046_Unigene_11896	leucine-rich repeat receptor kinase TDR	49.295	1980.56	40.1778	5.32833	0.00186598	Yes	0.132318	No	Up
XP_011098407	CDS_14520_Unigene_25533	CDS_11546_Unigene_20676	PREDICTED: uncharacterized protein LOC105177083, partial	2758.7	81.0629	0.0293845	-5.0888	0.00194507	Yes	0.137342	No	Down
XP_011096887	CDS_1874_Unigene_4390	CDS_3372_Unigene_6731	cannabidiolic acid synthase-like 1	3336.54	106.258	0.0318468	-4.97271	0.00195589	Yes	0.137523	No	Down
XP_011078363	CDS_32281_Unigene_50343	CDS_28024_Unigene_44798	probable ADP-ribosylation factor GTPase-activating AGD14	60.2495	2217.18	36.8	5.20163	0.00200665	Yes	0.140499	No	Up
XP_012851188	CDS_5853_Unigene_12054	CDS_1747_Unigene_3731	PREDICTED: uncharacterized protein LOC105970915	43.8178	1786.67	40.775	5.34961	0.00201203	Yes	0.140286	No	Up
XP_011094426	CDS_31619_Unigene_49300	CDS_13847_Unigene_24079	PREDICTED: enolase	26947	743.807	0.0276026	-5.17905	0.00201882	Yes	0.140173	No	Down
XP_011092960	CDS_2079_Unigene_4705	CDS_330_Unigene_732	zeaxanthin chloroplastic-like	23.7346	1191.84	50.2154	5.65006	0.00202503	Yes	0.140021	No	Up
XP_011073498	CDS_36728_Unigene_56482	CDS_31346_Unigene_49544	MATH domain-containing At5g43560-like isoform X1	94.9386	3038.76	32.0077	5.00035	0.00202974	Yes	0.139767	No	Up
XP_011090435	CDS_31627_Unigene_49314	CDS_30697_Unigene_48675	zinc finger CCCH domain-containing 44-like isoform X2	800.588	12.0499	0.0150513	-6.05397	0.00203591	Yes	0.139615	No	Down
XP_011081522	CDS_17556_Unigene_29776	CDS_14370_Unigene_24863	topless-related 1-like isoform X4	30.1247	1386.83	46.0364	5.5247	0.00204065	Yes	0.139366	No	Up
XP_011099175	CDS_39667_Unigene_62026	CDS_4176_Unigene_8061	PREDICTED: uncharacterized protein LOC105177651	3.65148	257.43	70.5	6.13955	0.00204206	Yes	0.138894	No	Up
XP_011072606	CDS_16624_Unigene_28495	CDS_4321_Unigene_8443	TIFY 10B-like	1138.35	21.9089	0.0192462	-5.69928	0.00204826	Yes	0.138749	No	Down
XP_012855398	CDS_688_Unigene_1649	CDS_5884_Unigene_11633	1,4-dihydroxy-2-naphthoyl- peroxisomal	1955.37	50.3905	0.0257703	-5.27815	0.00205668	Yes	0.138755	No	Down
XP_012851218	CDS_6447_Unigene_13011	CDS_25423_Unigene_41020	SNF1-related kinase catalytic subunit alpha KIN10-like	53.8594	2034.24	37.7695	5.23915	0.0020692	Yes	0.139037	No	Up
XP_011082866	CDS_16275_Unigene_28043	CDS_13285_Unigene_23238	polyphenol oxidase chloroplastic-like	3721.77	127.072	0.0341428	-4.87228	0.00208402	Yes	0.13947	No	Down
XP_011088185	CDS_9304_Unigene_17944	CDS_6565_Unigene_12665	PREDICTED: uncharacterized protein LOC105169489	6489.6	245.38	0.0378112	-4.72504	0.00208974	Yes	0.139294	No	Down
XP_011084862	CDS_1214_Unigene_2685	CDS_34361_Unigene_55190	PREDICTED: uncharacterized protein LOC105167009	9.12871	649.599	71.16	6.15299	0.00210115	Yes	0.139496	No	Up
XP_011092622	CDS_3564_Unigene_7777	CDS_6705_Unigene_12891	mechanosensitive ion channel 10-like	40.1663	1658.5	41.2909	5.36775	0.00211594	Yes	0.139921	No	Up
XP_011088780	CDS_29375_Unigene_46112	CDS_13849_Unigene_24081	serine threonine- kinase ATR	14.6059	875.261	59.925	5.90509	0.0021253	Yes	0.139984	No	Up
XP_011094752	CDS_35335_Unigene_54688	CDS_31650_Unigene_49990	two-component response regulator-like APRR3	5086.52	191.703	0.0376884	-4.72973	0.00214306	Yes	0.140598	No	Down
XP_011092897	CDS_3581_Unigene_7803	CDS_20248_Unigene_33381	actin-depolymerizing factor 5-like	4498.63	165.412	0.0367695	-4.76535	0.00215257	Yes	0.140668	No	Down
XP_011071702	CDS_10094_Unigene_19122	CDS_16418_Unigene_27867	cyclic dof factor 3-like	60.2495	2158.03	35.8182	5.16262	0.00218427	Yes	0.142182	No	Up
XP_011074120	CDS_32816_Unigene_51113	CDS_31293_Unigene_49468	eukaryotic translation initiation factor 5B	5419.71	208.135	0.0384032	-4.70263	0.00219655	Yes	0.142426	No	Down
XP_011073779	CDS_18778_Unigene_31430	CDS_22737_Unigene_37057	PREDICTED: uncharacterized protein LOC105158654 isoform X1	35.602	1508.43	42.3692	5.40495	0.0022108	Yes	0.142794	No	Up
XP_012840450	CDS_39892_Unigene_62731	CDS_1613_Unigene_3533	F-box PP2-B10-like	16.4317	926.747	56.4	5.81762	0.00221148	Yes	0.142286	No	Up
XP_011094459	CDS_33868_Unigene_52654	CDS_31252_Unigene_49403	ER membrane complex subunit 1	7054.67	272.766	0.0386646	-4.69284	0.00222667	Yes	0.142712	No	Down
XP_011073310	CDS_1328_Unigene_2864	CDS_23233_Unigene_37776	E3 SUMO- ligase pli1 isoform X1	44.7307	1743.95	38.9878	5.28495	0.0022617	Yes	0.144402	No	Up
XP_011083139	CDS_28716_Unigene_45192	CDS_28785_Unigene_45872	callose synthase 3	166.143	4427.79	26.6505	4.73609	0.00227499	Yes	0.144697	No	Up
XP_011093042	CDS_36986_Unigene_56827	CDS_30822_Unigene_48839	PREDICTED: uncharacterized protein LOC105173090	98.5901	2999.33	30.4222	4.92705	0.00230461	Yes	0.146023	No	Up
XP_011073453	CDS_15938_Unigene_27513	CDS_1138_Unigene_2497	GRIP and coiled-coil domain-containing 2-like	922	16.4317	0.0178218	-5.81021	0.00230724	Yes	0.145636	No	Down
XP_011094568	CDS_39313_Unigene_61024	CDS_2323_Unigene_4897	UDP-glycosyltransferase 73D1	2.73861	84.3493	30.8	4.94486	0.00231459	Yes	0.145548	No	Up
XP_011072648	CDS_11592_Unigene_21315	CDS_2754_Unigene_5536	PREDICTED: midasin	2781.52	88.7311	0.0319002	-4.97029	0.00231846	Yes	0.145244	No	Down
XP_011088259	CDS_19151_Unigene_31968	CDS_4156_Unigene_8023	glyco 3-alpha-L-fucosyltransferase A	1343.75	30.6725	0.0228261	-5.45317	0.00235845	Yes	0.147196	No	Down
XP_011101984	CDS_34392_Unigene_53356	CDS_25594_Unigene_41223	bifunctional mitochondrial isoform X2	1183.99	25.1952	0.0212799	-5.55437	0.0023588	Yes	0.146668	No	Down
XP_011076581	CDS_33186_Unigene_51643	CDS_7547_Unigene_14223	probable inactive serine threonine- kinase scy1 isoform X1	2618.11	82.1584	0.0313808	-4.99398	0.00236119	Yes	0.146271	No	Down
XP_011099049	CDS_2907_Unigene_6587	CDS_9400_Unigene_17118	auxin transport BIG	18.2574	960.705	52.62	5.71754	0.00239857	Yes	0.148036	No	Up
XP_011098633	CDS_27251_Unigene_43161	CDS_15643_Unigene_26754	granule-bound starch synthase chloroplastic amyloplastic isoform X1	470.129	12940.5	27.5254	4.78269	0.00240959	Yes	0.148168	No	Up
XP_011097444	CDS_5424_Unigene_11352	CDS_1325_Unigene_3042	mitochondrial carnitine acylcarnitine carrier	2120.6	62.4404	0.0294447	-5.08585	0.00251145	Yes	0.153863	No	Down
XP_011088331	CDS_16225_Unigene_27984	CDS_1223_Unigene_2743	probable E3 ubiquitin- ligase ARI2 isoform X1	1213.21	27.3861	0.0225734	-5.46923	0.00256551	Yes	0.1566	No	Down
EYU27018	CDS_34674_Unigene_53758	CDS_11758_Unigene_21003	hypothetical protein MIMGU_mgv1a023086mg, partial	442.742	11531.8	26.0462	4.703	0.00257621	Yes	0.156679	No	Up
XP_011096204	CDS_36024_Unigene_55540	CDS_29755_Unigene_47277	bifunctional riboflavin kinase FMN phosphatase-like	583.325	8.76356	0.0150235	-6.05664	0.00258027	Yes	0.156355	No	Down
XP_012843134	CDS_2756_Unigene_6335	CDS_655_Unigene_1518	PREDICTED: uncharacterized protein LOC105963287	2561.52	83.2538	0.0325018	-4.94334	0.00260196	Yes	0.157098	No	Down
XP_011081015	CDS_29324_Unigene_46047	CDS_8363_Unigene_15485	acyltransferase chloroplastic	109.545	3108.87	28.38	4.8268	0.00261291	Yes	0.15719	No	Up
XP_011071828	CDS_3084_Unigene_6925	CDS_13398_Unigene_23401	aldehyde dehydrogenase family 2 member mitochondrial	15063.3	549.913	0.0365069	-4.77569	0.00267281	Yes	0.160215	No	Down
XP_011092319	CDS_31493_Unigene_49130	CDS_23997_Unigene_38880	PREDICTED: uncharacterized protein At5g49945-like	261.994	6260.47	23.8955	4.57867	0.00267353	Yes	0.159683	No	Up
EYU17609	CDS_12358_Unigene_22434	CDS_11829_Unigene_21108	hypothetical protein MIMGU_mgv1a007197mg	6.3901	425.033	66.5143	6.05559	0.00267802	Yes	0.15938	No	Up
XP_011093739	CDS_11519_Unigene_21227	CDS_2536_Unigene_5236	PREDICTED: uncharacterized protein LOC105173627 isoform X1	125.063	3386.02	27.0745	4.75886	0.00270066	Yes	0.160156	No	Up
XP_012827697	CDS_1272_Unigene_2766	CDS_8065_Unigene_15089	PREDICTED: uncharacterized protein LOC105948977	16944.7	603.59	0.0356212	-4.81112	0.00270393	Yes	0.159781	No	Down
XP_011089660	CDS_29543_Unigene_46318	CDS_1686_Unigene_3648	galacturonosyltransferase 8-like	7787.7	325.347	0.041777	-4.58115	0.00274106	Yes	0.161403	No	Down
XP_011100785	CDS_36637_Unigene_56383	CDS_30895_Unigene_48945	serine threonine- phosphatase 4 regulatory subunit 3-like	68.4653	2179.94	31.84	4.99277	0.00278311	Yes	0.163302	No	Up
XP_011074654	CDS_31048_Unigene_48513	CDS_4845_Unigene_9422	auxin response factor 5-like	2124.25	65.7267	0.0309411	-5.01433	0.00278528	Yes	0.162856	No	Down
XP_011099738	CDS_13693_Unigene_24275	CDS_1251_Unigene_2859	enoyl- hydratase peroxisomal	62.0752	2033.15	32.7529	5.03355	0.00279885	Yes	0.163077	No	Up
XP_011089756	CDS_860_Unigene_2086	CDS_2140_Unigene_4558	E3 ubiquitin- ligase CIP8-like isoform X2	2217.36	70.1085	0.0316179	-4.98311	0.00280075	Yes	0.162619	No	Down
XP_012853739	CDS_14956_Unigene_26100	CDS_13201_Unigene_23117	probable receptor kinase At5g24010	1661.43	46.0087	0.0276923	-5.17437	0.00280689	Yes	0.16241	No	Down
XP_011091483	CDS_13749_Unigene_24376	CDS_4362_Unigene_8516	sulfate transporter chloroplastic	3177.7	117.213	0.036886	-4.76078	0.00285809	Yes	0.1648	No	Down
XP_011070505	CDS_8265_Unigene_16215	CDS_7505_Unigene_14136	NRT1 PTR FAMILY -like	201.744	4783.81	23.7122	4.56756	0.00288437	Yes	0.165742	No	Up
XP_011091914	CDS_2672_Unigene_6178	CDS_33393_Unigene_53115	vinorine synthase-like	15.5188	815.011	52.5176	5.71473	0.00288504	Yes	0.165211	No	Up
XP_011081548	CDS_33947_Unigene_52770	CDS_3109_Unigene_6209	clathrin assembly At2g25430	3878.79	154.458	0.0398211	-4.65032	0.00288794	Yes	0.16481	No	Down
XP_011075974	CDS_11895_Unigene_21793	CDS_12149_Unigene_21564	membrane of ER body	104.067	2899.64	27.8632	4.80029	0.00289322	Yes	0.164548	No	Up
XP_011092107	CDS_37727_Unigene_57850	CDS_31985_Unigene_50454	topless-related 3-like	329.546	7704.27	23.3784	4.5471	0.00289415	Yes	0.164041	No	Up
XP_011070522	CDS_18195_Unigene_30653	CDS_20538_Unigene_33810	serine threonine- kinase BRI1-like 2	27.3861	1155.69	42.2	5.39917	0.0029122	Yes	0.164505	No	Up
XP_011086837	CDS_11400_Unigene_21067	CDS_1743_Unigene_3727	glucose-6-phosphate 1- chloroplastic-like	250.127	5746.71	22.9752	4.522	0.00294701	Yes	0.165909	No	Up
XP_012843865	CDS_8784_Unigene_17116	CDS_7452_Unigene_14065	PREDICTED: uncharacterized protein LOC105963920 isoform X1	24.6475	1076.82	43.6889	5.44919	0.00295134	Yes	0.165593	No	Up
XP_012836707	CDS_21181_Unigene_34769	CDS_5372_Unigene_10554	receptor 12	4869.25	208.135	0.0427447	-4.54811	0.00296279	Yes	0.165678	No	Down
XP_011088662	CDS_31970_Unigene_49827	CDS_25839_Unigene_41603	rop guanine nucleotide exchange factor 1	79.4198	2361.78	29.7379	4.89423	0.00299521	Yes	0.16693	No	Up
XP_011091282	CDS_38563_Unigene_59131	CDS_1915_Unigene_4162	phosphate transporter PHO1	20.0832	943.178	46.9636	5.55347	0.00300386	Yes	0.166855	No	Up
XP_011091213	CDS_39588_Unigene_61851	CDS_7570_Unigene_14275	RING-H2 finger ATL16	5.47723	318.775	58.2	5.86295	0.00311342	Yes	0.172365	No	Up
AKN09555	CDS_26337_Unigene_41845	CDS_5837_Unigene_11527	basic helix-loop-helix transcription factor	1417.69	38.3406	0.0270444	-5.20852	0.00311682	Yes	0.171983	No	Down
XP_011085673	CDS_27386_Unigene_43349	CDS_33874_Unigene_54289	PREDICTED: uncharacterized protein LOC105167598	258.342	5790.52	22.4141	4.48634	0.00312883	Yes	0.172075	No	Up
XP_011090413	CDS_22349_Unigene_36438	CDS_19724_Unigene_32504	aldehyde dehydrogenase family 3 member F1	90.3742	2538.15	28.0848	4.81172	0.00318365	Yes	0.174514	No	Up
XP_011096085	CDS_23472_Unigene_37910	CDS_11429_Unigene_20492	polyadenylate-binding RBP45 isoform X2	4779.79	210.325	0.0440031	-4.50625	0.00320445	Yes	0.175079	No	Down
XP_011070488	CDS_22254_Unigene_36330	CDS_2149_Unigene_4581	tobamovirus multiplication 3	1634.95	48.1996	0.0294807	-5.08408	0.00323434	Yes	0.176134	No	Down
XP_011083517	CDS_37739_Unigene_57863	CDS_31572_Unigene_49878	5 -3 exoribonuclease 3 isoform X5	151.537	3677.41	24.2675	4.60095	0.00324818	Yes	0.176311	No	Up
XP_011098304	CDS_35265_Unigene_54578	CDS_29187_Unigene_46455	SPA1-RELATED 4-like isoform X3	60.2495	1896.22	31.4727	4.97603	0.00324909	Yes	0.175789	No	Up
XP_011077889	CDS_13089_Unigene_23433	CDS_21126_Unigene_34721	serine threonine- kinase D6PKL1-like	38.3406	1390.12	36.2571	5.18019	0.00325557	Yes	0.175569	No	Up
XP_011081726	CDS_16563_Unigene_28419	CDS_32131_Unigene_50683	PREDICTED: LOW QUALITY PROTEIN: uncharacterized protein LOC105164705	156.101	3731.09	23.9018	4.57904	0.00332694	Yes	0.178839	No	Up
Q2KNL6	CDS_5098_Unigene_10788	CDS_5958_Unigene_11766	GEDH1_OCIBA ame: Full=Geraniol dehydrogenase 1 Short= 1	628.968	15804	25.1269	4.65116	0.00336372	Yes	0.180235	No	Up
XP_011097437	CDS_1221_Unigene_2694	CDS_269_Unigene_584	glucan endo-1,3-beta-glucosidase 2-like	2195.45	75.5857	0.0344283	-4.86026	0.00338944	Yes	0.181031	No	Down
XP_011098011	CDS_32029_Unigene_49901	CDS_24093_Unigene_39049	sporulation-specific 15	34.6891	1277.29	36.8211	5.20246	0.0034126	Yes	0.181686	No	Up
XP_011092450	CDS_29253_Unigene_45957	CDS_7279_Unigene_13811	PREDICTED: uncharacterized protein LOC105172629	1263.41	33.9588	0.0268786	-5.2174	0.00342932	Yes	0.181994	No	Down
XP_011084997	CDS_33700_Unigene_52410	CDS_8544_Unigene_15797	cell division cycle 123 homolog	4076.88	177.462	0.0435289	-4.52188	0.00343117	Yes	0.181514	No	Down
XP_011086491	CDS_5063_Unigene_10727	CDS_8862_Unigene_16319	UDP-glycosyltransferase 74B1	2857.29	110.64	0.038722	-4.6907	0.00348866	Yes	0.183972	No	Down
XP_011094291	CDS_10877_Unigene_20300	CDS_17343_Unigene_29157	transcription initiation factor TFIID subunit 2 isoform X1	103.154	2694.79	26.1239	4.7073	0.00354919	Yes	0.186573	No	Up
EYU27028	CDS_10818_Unigene_20205	CDS_7603_Unigene_14350	hypothetical protein MIMGU_mgv1a010102mg	1479.76	43.8178	0.0296114	-5.07771	0.00358053	Yes	0.187629	No	Down
XP_011099924	CDS_18326_Unigene_30839	CDS_10222_Unigene_18451	uncharacterized oxidoreductase At4g09670-like	115.935	2925.93	25.2378	4.65751	0.0035839	Yes	0.187217	No	Up
XP_011094939	CDS_15369_Unigene_26686	CDS_17001_Unigene_28695	PREDICTED: uncharacterized protein LOC105174509	5563.95	262.907	0.0472518	-4.40349	0.00362302	Yes	0.188669	No	Down
XP_011081718	CDS_17330_Unigene_29480	CDS_13639_Unigene_23781	clathrin interactor EPSIN 1 isoform X1	140.582	3350.97	23.8364	4.57509	0.00364715	Yes	0.189334	No	Up
XP_011077604	CDS_11907_Unigene_21810	CDS_17997_Unigene_30145	fructose-1,6- chloroplastic	944.821	25968.6	27.4852	4.78058	0.00365022	Yes	0.188904	No	Up
XP_011091420	CDS_23182_Unigene_37501	CDS_23532_Unigene_38225	PREDICTED: uncharacterized protein LOC105171868	429.049	9241.17	21.5387	4.42886	0.00371386	Yes	0.191603	No	Up
XP_011079504	CDS_21223_Unigene_34825	CDS_17696_Unigene_29687	probable phosphatase 2C 49	17.3445	796.389	45.9158	5.52092	0.00371992	Yes	0.191323	No	Up
XP_011101653	CDS_25181_Unigene_40282	CDS_10395_Unigene_18766	rab3 GTPase-activating catalytic subunit isoform X3	67.5524	1961.94	29.0432	4.86013	0.00372448	Yes	0.190968	No	Up
XP_011072971	CDS_2440_Unigene_5659	CDS_6839_Unigene_13159	surfeit locus 1	896.439	20.8135	0.0232179	-5.42862	0.00378243	Yes	0.193345	No	Down
XP_011102097	CDS_14223_Unigene_25065	CDS_12289_Unigene_21787	PREDICTED: uncharacterized protein LOC105180144 isoform X1	1448.73	43.8178	0.0302457	-5.04712	0.003806	Yes	0.193955	No	Down
XP_011097233	CDS_19283_Unigene_32161	CDS_14453_Unigene_24982	PREDICTED: uncharacterized protein ycf36	829.8	21216.6	25.5683	4.67629	0.00381291	Yes	0.193715	No	Up
XP_011080785	CDS_25950_Unigene_41273	CDS_19477_Unigene_32158	asparagine synthetase [glutamine-hydrolyzing]	873.617	22607.8	25.8784	4.69367	0.00384759	Yes	0.194882	No	Up
XP_011093497	CDS_12397_Unigene_22490	CDS_7719_Unigene_14556	PREDICTED: uncharacterized protein At5g05190	47.4693	1510.62	31.8231	4.992	0.00391057	Yes	0.197472	No	Up
XP_011100314	CDS_26971_Unigene_42726	CDS_13332_Unigene_23307	BTB POZ domain-containing At3g22104-like	516.685	9.85901	0.0190813	-5.7117	0.00392696	Yes	0.1977	No	Down
XP_011075998	CDS_19073_Unigene_31857	CDS_15043_Unigene_25879	sec-independent translocase chloroplastic	248.301	5114.63	20.5985	4.36447	0.00394128	Yes	0.197824	No	Up
XP_011080791	CDS_23286_Unigene_37633	CDS_1026_Unigene_2186	6-phosphofructo-2-kinase fructose-2,6-bisphosphatase	2043.92	73.3948	0.0359089	-4.79952	0.00395056	Yes	0.197694	No	Down
XP_011101302	CDS_7553_Unigene_14991	CDS_4333_Unigene_8462	cell division cycle 48 homolog	33.7762	1188.56	35.1892	5.13706	0.00399139	Yes	0.19914	No	Up
XP_011084559	CDS_12714_Unigene_22948	CDS_4542_Unigene_8875	GRF1-interacting factor 2-like	54.7723	1654.12	30.2	4.91648	0.00400647	Yes	0.199295	No	Up
XP_012848549	CDS_6003_Unigene_12296	CDS_13874_Unigene_24111	glutamate receptor -like	48.3822	2.19089	0.045283	-4.46489	0.00403374	Yes	0.200054	No	Down
XP_012830110	CDS_1082_Unigene_2435	CDS_7536_Unigene_14193	PREDICTED: uncharacterized protein LOC105951259 isoform X1	59.3366	1742.85	29.3723	4.87638	0.00404648	Yes	0.200091	No	Up
XP_011084361	CDS_10567_Unigene_19833	CDS_9210_Unigene_16857	PREDICTED: uncharacterized protein LOC105166627	2215.54	83.2538	0.0375773	-4.734	0.00405039	Yes	0.199691	No	Down
XP_011082112	CDS_28377_Unigene_44758	CDS_29429_Unigene_46797	DDB1- and CUL4-associated factor homolog 1	251.04	5101.49	20.3215	4.34493	0.00407535	Yes	0.200329	No	Up
XP_011090859	CDS_31730_Unigene_49463	CDS_8095_Unigene_15132	sodium hydrogen exchanger 1-like	1188.56	33.9588	0.0285714	-5.12928	0.00409003	Yes	0.20046	No	Down
XP_011090549	CDS_22926_Unigene_37182	CDS_5719_Unigene_11281	BTB POZ domain-containing DOT3	810.629	18.6226	0.022973	-5.44392	0.00410738	Yes	0.20072	No	Down
XP_011092586	CDS_5465_Unigene_11422	CDS_865_Unigene_1944	4-coumarate-- ligase-like 6	32.8634	1154.6	35.1333	5.13477	0.0041208	Yes	0.200787	No	Up
XP_011072113	CDS_21840_Unigene_35729	CDS_8451_Unigene_15652	adenylosuccinate lyase-like	154.275	3446.27	22.3385	4.48146	0.00413617	Yes	0.200948	No	Up
XP_011076199	CDS_13296_Unigene_23732	CDS_16216_Unigene_27604	PREDICTED: uncharacterized protein LOC105160499	1522.67	49.295	0.0323741	-4.94902	0.00416358	Yes	0.201691	No	Down
XP_011070024	CDS_5635_Unigene_11702	CDS_33503_Unigene_53459	PREDICTED: uncharacterized protein LOC105155775	71.2039	1959.75	27.5231	4.78257	0.00417162	Yes	0.201495	No	Up
XP_011082968	CDS_25775_Unigene_41039	CDS_1710_Unigene_3681	cytochrome P450 CYP72A219-like	455.523	9347.43	20.5202	4.35898	0.00419233	Yes	0.201911	No	Up
XP_011076977	CDS_13078_Unigene_23414	CDS_14796_Unigene_25490	PREDICTED: uncharacterized protein LOC105161097	3865.1	180.748	0.0467643	-4.41845	0.00421047	Yes	0.2022	No	Down
XP_011099783	CDS_5928_Unigene_12171	CDS_5358_Unigene_10502	PREDICTED: protein TONSOKU	738.513	16.4317	0.0222497	-5.49007	0.00422149	Yes	0.202146	No	Down
XP_011079595	CDS_22436_Unigene_36554	CDS_15417_Unigene_26460	kynurenine--oxoglutarate transaminase 1-like	7.30297	358.211	49.05	5.61618	0.00422767	Yes	0.201862	No	Up
XP_011101650	CDS_39192_Unigene_60801	CDS_5331_Unigene_10438	PREDICTED: uncharacterized protein LOC105179697	3164.01	139.122	0.04397	-4.50734	0.00426583	Yes	0.203102	No	Down
XP_011076282	CDS_25405_Unigene_40579	CDS_1640_Unigene_3575	65-kDa microtubule-associated 3	1266.15	38.3406	0.0302812	-5.04543	0.00429929	Yes	0.204112	No	Down
XP_011083594	CDS_4396_Unigene_9500	CDS_6163_Unigene_12064	lysine-specific histone demethylase 1 homolog 3	125.976	2929.22	23.2522	4.53929	0.00429943	Yes	0.203539	No	Up
XP_011090966	CDS_6607_Unigene_13288	CDS_1679_Unigene_3640	translocase of chloroplast chloroplastic-like	121.412	2850.35	23.4767	4.55316	0.00429987	Yes	0.202983	No	Up
XP_011073291	CDS_35749_Unigene_55198	CDS_24108_Unigene_39070	glycine--tRNA ligase mitochondrial-like	2659.19	110.64	0.0416066	-4.58704	0.00433181	Yes	0.203913	No	Down
XP_011073420	CDS_8645_Unigene_16871	CDS_16972_Unigene_28640	topless-related 4	48.3822	1476.66	30.5208	4.93172	0.00433553	Yes	0.203514	No	Up
XP_011092184	CDS_17479_Unigene_29691	CDS_32323_Unigene_50908	GDSL esterase lipase At1g09390	6.3901	289.198	45.2571	5.50007	0.00437762	Yes	0.204912	No	Up
XP_011086564	CDS_32046_Unigene_49927	CDS_4627_Unigene_9001	PREDICTED: cyclin-T1-3-like	1223.25	37.2451	0.0304478	-5.03752	0.00448631	Yes	0.209411	No	Down
XP_011099347	CDS_15017_Unigene_26180	CDS_19429_Unigene_32086	xyloglucan galactosyltransferase KATAMARI1 homolog	130.541	2964.27	22.7077	4.50511	0.00449032	Yes	0.209013	No	Up
XP_011088392	CDS_21479_Unigene_35242	CDS_21708_Unigene_35557	BTB POZ domain-containing At3g05675-like	187.139	3861.44	20.6341	4.36696	0.00456352	Yes	0.211829	No	Up
XP_011083501	CDS_10583_Unigene_19851	CDS_25838_Unigene_41601	IQ-DOMAIN 32	157.014	3371.78	21.4744	4.42455	0.00460251	Yes	0.213045	No	Up
XP_011081033	CDS_36932_Unigene_56752	CDS_31881_Unigene_50336	PREDICTED: transportin-1-like	125.976	2854.73	22.6609	4.50213	0.00464521	Yes	0.214426	No	Up
BAA19659	CDS_2128_Unigene_4803	CDS_32528_Unigene_51218	flavonoid 3-O-glucosyltransferase	53.8594	1553.34	28.8407	4.85003	0.0046454	Yes	0.213842	No	Up
XP_011070719	CDS_14421_Unigene_25371	CDS_18163_Unigene_30338	PREDICTED: uncharacterized protein LOC105156320	2521.35	106.258	0.0421434	-4.56855	0.00464907	Yes	0.213422	No	Down
XP_011075526	CDS_12798_Unigene_23033	CDS_10992_Unigene_19714	probable sulfate transporter	1618.52	56.9631	0.0351946	-4.8285	0.00466117	Yes	0.21339	No	Down
AKV71965	CDS_33220_Unigene_51700	CDS_28910_Unigene_46054	3R MYB	1306.32	42.7224	0.0327044	-4.93437	0.00484902	Yes	0.221381	No	Down
XP_011073043	CDS_11994_Unigene_21949	CDS_4625_Unigene_9000	probable LRR receptor-like serine threonine- kinase At1g74360	285.729	6.57267	0.0230032	-5.44202	0.00491123	Yes	0.223608	No	Down
XP_011077387	CDS_39340_Unigene_61096	CDS_33373_Unigene_53037	PREDICTED: uncharacterized protein LOC105161412	754.031	18.6226	0.0246973	-5.3395	0.00495036	Yes	0.224776	No	Down
XP_011079088	CDS_21383_Unigene_35067	CDS_19759_Unigene_32560	PREDICTED: uncharacterized protein LOC105162695	293.944	5469.56	18.6075	4.21781	0.00495189	Yes	0.224234	No	Up
XP_012838395	CDS_19817_Unigene_32873	CDS_13259_Unigene_23205	sn1-specific diacylglycerol lipase alpha-like	16.4317	681.367	41.4667	5.37388	0.00498969	Yes	0.225334	No	Up
AGN52132	CDS_29151_Unigene_45788	CDS_26688_Unigene_42818	MYB-related transcription factor	1037.93	30.6725	0.0295515	-5.08063	0.00499739	Yes	0.225072	No	Down
XP_011098005	CDS_36999_Unigene_56845	CDS_423_Unigene_899	kinesin-like calmodulin-binding homolog	1760.93	66.8222	0.0379471	-4.71987	0.0050451	Yes	0.226608	No	Down
XP_012844136	CDS_15251_Unigene_26492	CDS_5871_Unigene_11589	alpha beta hydrolase domain-containing 17B-like	2412.72	104.067	0.0431328	-4.53507	0.00506448	Yes	0.226867	No	Down
XP_011080784	CDS_15117_Unigene_26294	CDS_17870_Unigene_29951	pentatricopeptide repeat-containing chloroplastic	113.196	2561.15	22.6258	4.4999	0.005067	Yes	0.226372	No	Up
XP_004135090	CDS_4053_Unigene_8849	CDS_15133_Unigene_26020	3-ketoacyl- synthase 6	5.47723	158.84	29	4.85798	0.00518809	Yes	0.231161	No	Up
XP_011076115	CDS_2069_Unigene_4689	CDS_2267_Unigene_4800	probable receptor kinase At5g24010	86.7227	2090.11	24.1011	4.59102	0.00521561	Yes	0.231768	No	Up
XP_011101915	CDS_14447_Unigene_25425	CDS_12967_Unigene_22774	F-box SKP2A-like	106.806	2426.41	22.7179	4.50576	0.00524066	Yes	0.232262	No	Up
XP_011070862	CDS_37555_Unigene_57627	CDS_26337_Unigene_42289	phospholipid-transporting ATPase 9	103.154	2357.4	22.8531	4.51432	0.00529433	Yes	0.234018	No	Up
XP_011087684	CDS_13532_Unigene_24057	CDS_18781_Unigene_31180	PREDICTED: uncharacterized protein LOC105169093	2227.41	95.3037	0.0427869	-4.54669	0.0053118	Yes	0.234169	No	Down
XP_011070196	CDS_29619_Unigene_46434	CDS_15365_Unigene_26382	TRANSPARENT TESTA 12-like	261.081	4787.1	18.3357	4.19658	0.00533469	Yes	0.234557	No	Up
EYU21187	CDS_18527_Unigene_31095	CDS_7307_Unigene_13846	hypothetical protein MIMGU_mgv1a005199mg	9.12871	387.788	42.48	5.40871	0.00539483	Yes	0.236578	No	Up
XP_011090163	CDS_37756_Unigene_57883	CDS_31588_Unigene_49898	CHROMATIN REMODELING 5 isoform X2	1739.93	67.9176	0.0390346	-4.6791	0.0053981	Yes	0.236099	No	Down
XP_011076071	CDS_15799_Unigene_27323	CDS_19039_Unigene_31551	ATP-dependent RNA helicase DHX36	46.5564	1328.77	28.5412	4.83497	0.00540426	Yes	0.23575	No	Up
XP_011090607	CDS_2159_Unigene_4874	CDS_1861_Unigene_4002	E3 ubiquitin- ligase RKP	148.798	3069.44	20.6282	4.36655	0.00541521	Yes	0.235611	No	Up
XP_011100833	CDS_38738_Unigene_59695	CDS_729_Unigene_1651	PREDICTED: uncharacterized protein LOC105178939	726.645	18.6226	0.0256281	-5.28613	0.00542171	Yes	0.23528	No	Down
XP_011076067	CDS_4145_Unigene_9051	CDS_33640_Unigene_53622	PREDICTED: uncharacterized protein LOC105160403	149.711	3074.91	20.539	4.3603	0.00546043	Yes	0.236345	No	Up
XP_011072873	CDS_27156_Unigene_43001	CDS_3279_Unigene_6580	PREDICTED: uncharacterized protein LOC105157989	1028.81	31.7679	0.0308784	-5.01726	0.00546305	Yes	0.235845	No	Down
XP_012840572	CDS_28074_Unigene_44328	CDS_18588_Unigene_30893	eukaryotic translation initiation factor 3 subunit M	377.929	6750.13	17.8609	4.15873	0.00546832	Yes	0.235463	No	Up
XP_011088614	CDS_2295_Unigene_5210	CDS_4605_Unigene_8971	probable BOI-related E3 ubiquitin- ligase 2	5.47723	142.408	26	4.70044	0.00550411	Yes	0.236393	No	Up
XP_011083931	CDS_4659_Unigene_9974	CDS_8771_Unigene_16163	PREDICTED: uncharacterized protein LOC105166321	1113.7	36.1497	0.032459	-4.94524	0.00553741	Yes	0.237212	No	Down
XP_011070386	CDS_4904_Unigene_10444	CDS_1145_Unigene_2517	PREDICTED: uncharacterized protein LOC105156053	90.3742	2105.45	23.297	4.54207	0.00556793	Yes	0.237908	No	Up
XP_011078272	CDS_18426_Unigene_30963	CDS_6108_Unigene_11986	sugar transport 14-like	285.729	5087.25	17.8045	4.15417	0.00559941	Yes	0.238641	No	Up
XP_012832418	CDS_39247_Unigene_60906	CDS_4276_Unigene_8314	homocysteine S-methyltransferase 2	168.881	3327.96	19.7059	4.30056	0.00564628	Yes	0.240025	No	Up
XP_011088487	CDS_13103_Unigene_23456	CDS_15315_Unigene_26309	fructose-bisphosphate aldolase chloroplastic	3942.69	205159	52.0354	5.70142	0.00566173	Yes	0.240069	No	Up
AET80382	CDS_8375_Unigene_16413	CDS_26064_Unigene_41927	beta-tubulin partial	115.022	2494.33	21.6857	4.43867	0.0056704	Yes	0.239826	No	Up
XP_011098627	CDS_6365_Unigene_12884	CDS_5183_Unigene_10047	structural maintenance of chromosomes 4	2462.93	112.831	0.0458117	-4.44814	0.00567184	Yes	0.23928	No	Down
XP_011086042	CDS_12455_Unigene_22589	CDS_3175_Unigene_6387	PREDICTED: LOW QUALITY PROTEIN: protein E6-like	6512.42	371.356	0.0570227	-4.13232	0.00570423	Yes	0.240039	No	Down
XP_011076935	CDS_4272_Unigene_9304	CDS_874_Unigene_1955	trichome birefringence-like 36	820.671	23.0043	0.0280311	-5.15683	0.00572176	Yes	0.24017	No	Down
XP_011099355	CDS_2180_Unigene_4923	CDS_4472_Unigene_8753	LOB domain-containing 37-like	73.0297	1789.96	24.51	4.6153	0.00572721	Yes	0.239795	No	Up
XP_012834804	CDS_27660_Unigene_43742	CDS_11903_Unigene_21205	PREDICTED: uncharacterized protein LOC105955596	33.7762	1041.77	30.8432	4.94688	0.00581923	Yes	0.243037	No	Up
XP_011073914	CDS_13460_Unigene_23943	CDS_2596_Unigene_5304	chitinase 1	1286.24	29593.4	23.0078	4.52405	0.00583536	Yes	0.243101	No	Up
XP_012071439	CDS_2966_Unigene_6700	CDS_12382_Unigene_21943	PREDICTED: uncharacterized protein LOC105633461	468.303	8227.89	17.5696	4.13501	0.00588016	Yes	0.244357	No	Up
XP_011071367	CDS_13695_Unigene_24278	CDS_4778_Unigene_9270	PREDICTED: uncharacterized protein LOC105156833	1379.35	51.4859	0.0373263	-4.74366	0.00598902	Yes	0.248261	No	Down
XP_011082285	CDS_29754_Unigene_46617	CDS_17582_Unigene_29497	serine--tRNA mitochondrial isoform X1	146.059	2925.93	20.0325	4.32427	0.00599007	Yes	0.247689	No	Up
XP_011100424	CDS_8122_Unigene_16005	CDS_4654_Unigene_9055	Fanconi anemia group J	927.477	28.4816	0.0307087	-5.02521	0.00599172	Yes	0.247144	No	Down
XP_011078541	CDS_21267_Unigene_34891	CDS_7186_Unigene_13693	heparanase 3	1146.57	39.436	0.0343949	-4.86166	0.00600034	Yes	0.246888	No	Down
XP_011080458	CDS_30868_Unigene_48256	CDS_8144_Unigene_15201	NADP-dependent malic enzyme-like	4599.96	261.811	0.0569161	-4.13502	0.00601405	Yes	0.246843	No	Down
XP_011086391	CDS_19091_Unigene_31882	CDS_4178_Unigene_8064	alpha-amylase chloroplastic	2007.4	87.6356	0.0436562	-4.51767	0.00603132	Yes	0.246943	No	Down
XP_011096255	CDS_12215_Unigene_22230	CDS_32823_Unigene_51899	bifunctional epoxide hydrolase 2-like	230.956	4139.69	17.9241	4.16383	0.00605197	Yes	0.247182	No	Up
XP_011097360	CDS_28208_Unigene_44498	CDS_1592_Unigene_3503	G-type lectin S-receptor-like serine threonine- kinase At1g34300	89.4614	2024.38	22.6286	4.50007	0.00610891	Yes	0.248897	No	Up
XP_011074229	CDS_19272_Unigene_32146	CDS_1746_Unigene_3730	BEACH domain-containing lvsC	3130.23	161.03	0.0514436	-4.28087	0.00611176	Yes	0.248406	No	Down
XP_012841478	CDS_33398_Unigene_52001	CDS_5632_Unigene_11109	PREDICTED: uncharacterized protein LOC105961762	136.018	2752.85	20.2389	4.33906	0.00612212	Yes	0.248221	No	Up
EYU40487	CDS_36255_Unigene_55831	CDS_2852_Unigene_5720	hypothetical protein MIMGU_mgv1a0001292mg, partial	2362.51	110.64	0.0468315	-4.41638	0.00614123	Yes	0.248392	No	Down
XP_011096866	CDS_10134_Unigene_19201	CDS_8743_Unigene_16119	LRR receptor-like serine threonine- kinase GSO1	50.2079	1337.54	26.64	4.73552	0.00614677	Yes	0.248014	No	Up
XP_011094236	CDS_24835_Unigene_39789	CDS_10026_Unigene_18114	BEL1-like homeodomain 1	3297.29	173.08	0.0524917	-4.25177	0.0061528	Yes	0.247658	No	Down
XP_011084684	CDS_38737_Unigene_59694	CDS_3721_Unigene_7286	INO80 complex subunit D-like	961.253	30.6725	0.0319088	-4.9699	0.00619865	Yes	0.248902	No	Down
XP_011094505	CDS_29869_Unigene_46776	CDS_30562_Unigene_48469	PREDICTED: uncharacterized protein LOC105174183	51.1208	1348.49	26.3786	4.72129	0.00622567	Yes	0.249386	No	Up
XP_011096834	CDS_14029_Unigene_24773	CDS_8823_Unigene_16263	copper-transporting ATPase RAN1	1127.4	39.436	0.0349798	-4.83734	0.00629052	Yes	0.251379	No	Down
XP_012845174	CDS_27410_Unigene_43380	CDS_22057_Unigene_36048	aspartic ase 1 isoform X1	38.3406	1100.92	28.7143	4.8437	0.00630363	Yes	0.251301	No	Up
XP_011073382	CDS_15812_Unigene_27339	CDS_13140_Unigene_23038	DEAD-box ATP-dependent RNA helicase 35	2043.92	92.0174	0.0450201	-4.47329	0.0063367	Yes	0.252016	No	Down
XP_011081377	CDS_1501_Unigene_3243	CDS_5527_Unigene_10889	cytochrome P450 76C1-like	12.7802	489.664	38.3143	5.25981	0.00635066	Yes	0.25197	No	Up
XP_011072809	CDS_31512_Unigene_49142	CDS_29276_Unigene_46576	formin 20 isoform X1	85.8099	1936.75	22.5702	4.49635	0.0063638	Yes	0.251892	No	Up
XP_011093142	CDS_23706_Unigene_38189	CDS_17933_Unigene_30047	acyl-coenzyme A thioesterase 8-like	72.1168	1705.61	23.6506	4.56381	0.00640608	Yes	0.252964	No	Up
XP_011086191	CDS_9457_Unigene_18190	CDS_3235_Unigene_6508	5 -adenylylsulfate reductase chloroplastic-like	797.849	14978	18.773	4.23059	0.00643424	Yes	0.253476	No	Up
XP_012841462	CDS_28647_Unigene_45090	CDS_17851_Unigene_29914	NEDD8-activating enzyme E1 regulatory subunit	83.9841	1895.12	22.5652	4.49603	0.00647843	Yes	0.254615	No	Up
XP_011086216	CDS_20448_Unigene_33704	CDS_1319_Unigene_3034	E3 ubiquitin- ligase COP1-like	427.224	7121.49	16.6692	4.05912	0.00649873	Yes	0.254811	No	Up
XP_011091060	CDS_4232_Unigene_9239	CDS_4401_Unigene_8599	condensin-2 complex subunit D3	700.172	19.718	0.0281617	-5.15012	0.00651727	Yes	0.254938	No	Down
XP_011071632	CDS_19619_Unigene_32605	CDS_25025_Unigene_40440	microtubule-associated RP EB family member 1B	1356.53	52.5814	0.0387618	-4.68922	0.00653025	Yes	0.254848	No	Down
XP_011090954	CDS_11322_Unigene_20958	CDS_4510_Unigene_8816	CAP-Gly domain-containing linker 1 isoform X1	3323.76	179.653	0.0540511	-4.20953	0.00653214	Yes	0.254326	No	Down
XP_012834047	CDS_8163_Unigene_16055	CDS_16250_Unigene_27648	guanine nucleotide-binding subunit beta	669.134	11873.5	17.7446	4.14931	0.00653524	Yes	0.253854	No	Up
XP_011085267	CDS_24129_Unigene_38812	CDS_2013_Unigene_4359	dynamin-related 1E	1355.61	52.5814	0.0387879	-4.68825	0.00654224	Yes	0.253534	No	Down
XP_011088306	CDS_16424_Unigene_28249	CDS_9311_Unigene_16987	phragmoplast orienting kinesin 2	1659.6	70.1085	0.0422442	-4.5651	0.00658314	Yes	0.254528	No	Down
XP_012855125	CDS_33972_Unigene_52797	CDS_26358_Unigene_42325	serine threonine- kinase Nek2-like	2099.6	97.4946	0.0464348	-4.42865	0.00661592	Yes	0.255203	No	Down
XP_011080122	CDS_13620_Unigene_24181	CDS_3854_Unigene_7471	subtilisin-like protease SDD1	602.495	16.4317	0.0272727	-5.1964	0.00664631	Yes	0.255783	No	Down
XP_011078587	CDS_11567_Unigene_21286	CDS_34257_Unigene_55070	adenylate kinase chloroplastic isoform X1	375.19	6152.02	16.3971	4.03537	0.0066774	Yes	0.256388	No	Up
XP_011078265	CDS_11999_Unigene_21956	CDS_18014_Unigene_30169	PREDICTED: uncharacterized protein LOC105162059	118.673	2409.98	20.3077	4.34395	0.00670329	Yes	0.25679	No	Up
XP_011084485	CDS_18060_Unigene_30479	CDS_7313_Unigene_13851	probable dihydrofolate synthetase	17.3445	618.926	35.6842	5.15721	0.00672709	Yes	0.257111	No	Up
XP_011086542	CDS_32387_Unigene_50467	CDS_19232_Unigene_31811	potassium transporter 6-like isoform X2	20.0832	693.417	34.5273	5.10966	0.00673508	Yes	0.256827	No	Up
XP_011082902	CDS_28721_Unigene_45198	CDS_19198_Unigene_31768	callose synthase 7	2136.12	100.781	0.0471795	-4.4057	0.0067477	Yes	0.256721	No	Down
XP_011069519	CDS_121_Unigene_290	CDS_20936_Unigene_34428	LRR receptor-like serine threonine- kinase ERECTA	559.59	9415.35	16.8254	4.07257	0.00676862	Yes	0.25693	No	Up
XP_012828041	CDS_21986_Unigene_35959	CDS_11393_Unigene_20427	zeatin O-glucosyltransferase-like	52.0336	1323.3	25.4316	4.66855	0.00678232	Yes	0.256865	No	Up
XP_011073581	CDS_17663_Unigene_29942	CDS_5833_Unigene_11514	cyclin-dependent kinase G-2-like	742.164	21.9089	0.0295203	-5.08215	0.00678239	Yes	0.256285	No	Down
XP_012832579	CDS_26986_Unigene_42746	CDS_21700_Unigene_35542	MATE efflux family 5-like isoform X2	85.8099	1892.93	22.0596	4.46333	0.00679407	Yes	0.256146	No	Up
XP_011093132	CDS_12645_Unigene_22861	CDS_11942_Unigene_21265	glycerol-3-phosphate 2-O-acyltransferase 4-like	11722.2	673.699	0.0574722	-4.12099	0.00680571	Yes	0.256005	No	Down
XP_009111101	CDS_29469_Unigene_46222	CDS_26201_Unigene_42122	60S ribosomal L23-like	6927.78	425.033	0.061352	-4.02675	0.006841	Yes	0.256753	No	Down
BAE06271	CDS_23165_Unigene_37484	CDS_13635_Unigene_23774	cyclin A	23.7346	775.575	32.6769	5.0302	0.00685467	Yes	0.256688	No	Up
XP_011089723	CDS_26310_Unigene_41809	CDS_17109_Unigene_28866	PREDICTED: uncharacterized protein LOC105170595 isoform X1	489.299	13.1453	0.0268657	-5.21809	0.00685939	Yes	0.256289	No	Down
XP_011074531	CDS_37669_Unigene_57771	CDS_31951_Unigene_50416	PREDICTED: uncharacterized protein LOC105159236 isoform X2	34.6891	999.046	28.8	4.848	0.00686791	Yes	0.256033	No	Up
XP_011091671	CDS_11317_Unigene_20952	CDS_676_Unigene_1560	PREDICTED: uncharacterized protein LOC105172030	1935.29	88.7311	0.0458491	-4.44696	0.00687328	Yes	0.255662	No	Down
XP_011073365	CDS_145_Unigene_375	CDS_8266_Unigene_15371	F-box LRR-repeat 14	859.012	27.3861	0.031881	-4.97116	0.00687361	Yes	0.255104	No	Down
XP_009768512	CDS_2029_Unigene_4617	CDS_12757_Unigene_22451	heat shock 82	387.057	6250.61	16.1491	4.01338	0.00693056	Yes	0.256646	No	Up
XP_011073534	CDS_25256_Unigene_40366	CDS_18355_Unigene_30564	E3 ubiquitin- ligase XBAT34 isoform X2	16.4317	582.777	35.4667	5.14839	0.0069312	Yes	0.256101	No	Up
XP_011091773	CDS_2019_Unigene_4606	CDS_767_Unigene_1734	serine carboxypeptidase-like 40	943.909	31.7679	0.0336557	-4.89301	0.00693889	Yes	0.255818	No	Down
XP_011088506	CDS_3794_Unigene_8263	CDS_16022_Unigene_27327	PREDICTED: uncharacterized protein LOC105169716 isoform X1	24.6475	792.007	32.1333	5.006	0.00694265	Yes	0.255391	No	Up
XP_011093295	CDS_2090_Unigene_4716	CDS_131_Unigene_324	transcription factor UNE10-like	806.978	14558.5	18.0407	4.17319	0.00695482	Yes	0.255276	No	Up
XP_012855705	CDS_15424_Unigene_26770	CDS_19559_Unigene_32276	coatomer subunit zeta-1-like	1449.64	60.2495	0.0415617	-4.5886	0.00709934	Yes	0.260008	No	Down
XP_011100012	CDS_32238_Unigene_50258	CDS_4300_Unigene_8378	ATP-dependent 6-phosphofructokinase chloroplastic-like	1118.27	41.6269	0.0372245	-4.7476	0.00711535	Yes	0.260022	No	Down
AKT44366	CDS_39795_Unigene_62603	CDS_7782_Unigene_14668	bax inhibitor	974.033	33.9588	0.0348641	-4.84211	0.0071778	Yes	0.26173	No	Down
XP_011077158	CDS_35843_Unigene_55313	CDS_30301_Unigene_48076	aspartic ase 2 isoform X1	1851.3	85.4447	0.0461538	-4.43741	0.00721586	Yes	0.262544	No	Down
XP_011091761	CDS_4696_Unigene_10048	CDS_5711_Unigene_11261	elicitor-responsive 3-like	28.299	856.638	30.271	4.91986	0.00722257	Yes	0.262215	No	Up
XP_011101793	CDS_29413_Unigene_46144	CDS_26537_Unigene_42627	probable glucuronosyltransferase Os03g0107900	1119.18	42.7224	0.0381729	-4.71131	0.00745034	Yes	0.269897	No	Down
XP_012833208	CDS_39958_Unigene_62841	CDS_33648_Unigene_53632	indole-3-acetic acid-amido synthetase	10.9545	380.119	34.7	5.11686	0.00746394	Yes	0.269803	No	Up
XP_011081596	CDS_26802_Unigene_42488	CDS_27077_Unigene_43381	copper-transporting ATPase chloroplastic	252.865	4135.31	16.3538	4.03155	0.00748693	Yes	0.270048	No	Up
XP_011083442	CDS_17920_Unigene_30282	CDS_10140_Unigene_18303	ribonuclease P subunit p25	259.255	4193.36	16.1746	4.01566	0.00762186	Yes	0.274321	No	Up
XP_011092457	CDS_32802_Unigene_51099	CDS_30537_Unigene_48433	dynamin-related 3A-like	230.043	3807.77	16.5524	4.04897	0.00764427	Yes	0.274535	No	Up
XP_011096476	CDS_12278_Unigene_22309	CDS_11310_Unigene_20274	60S ribosomal L32-1	5813.16	375.738	0.0646357	-3.95153	0.00767496	Yes	0.275044	No	Down
XP_011075539	CDS_34772_Unigene_53901	CDS_28253_Unigene_45103	ARF guanine-nucleotide exchange factor GNOM	109.545	2164.6	19.76	4.30451	0.00769952	Yes	0.275332	No	Up
XP_011073815	CDS_11814_Unigene_21679	CDS_2316_Unigene_4884	disease resistance At1g50180	427.224	6611.01	15.4744	3.95181	0.00770408	Yes	0.274905	No	Up
XP_011093071	CDS_11009_Unigene_20479	CDS_17610_Unigene_29540	BAG family molecular chaperone regulator 6	72.1168	1596.06	22.1316	4.46804	0.00771315	Yes	0.274641	No	Up
XP_011074768	CDS_1003_Unigene_2296	CDS_4676_Unigene_9093	transmembrane 184 homolog DDB_G0279555-like isoform X1	19.1703	627.69	32.7429	5.03311	0.00773471	Yes	0.274821	No	Up
XP_011085314	CDS_25545_Unigene_40733	CDS_7634_Unigene_14420	probable LRR receptor-like serine threonine- kinase RFK1 isoform X2	76.6812	1666.17	21.7286	4.44152	0.00774138	Yes	0.274473	No	Up
XP_011075333	CDS_10096_Unigene_19124	CDS_10950_Unigene_19646	ABC transporter A family member 1	2651.89	144.599	0.0545267	-4.19689	0.00781721	Yes	0.276573	No	Down
XP_011100763	CDS_10124_Unigene_19179	CDS_17298_Unigene_29107	PREDICTED: uncharacterized protein LOC105178888 isoform X2	2198.19	112.831	0.0513289	-4.28408	0.00787598	Yes	0.278062	No	Down
EYU40807	CDS_33458_Unigene_52093	CDS_29989_Unigene_47675	hypothetical protein MIMGU_mgv1a023095mg, partial	6.3901	127.072	19.8857	4.31366	0.00791238	Yes	0.278757	No	Up
XP_011086325	CDS_13247_Unigene_23661	CDS_12143_Unigene_21556	nuclear-pore anchor	5405.11	353.829	0.0654619	-3.9332	0.00796	Yes	0.279843	No	Down
XP_011089807	CDS_16998_Unigene_29032	CDS_16921_Unigene_28562	centrosomal of 83 kDa isoform X1	1148.39	46.0087	0.0400636	-4.64156	0.00796875	Yes	0.27956	No	Down
XP_012844744	CDS_16269_Unigene_28040	CDS_14889_Unigene_25641	G-type lectin S-receptor-like serine threonine- kinase At1g11330 isoform X1	176.184	3047.53	17.2974	4.11248	0.00804362	Yes	0.281594	No	Up
XP_011080657	CDS_10668_Unigene_19972	CDS_425_Unigene_900	PREDICTED: uncharacterized protein LOC105163859	1292.63	54.7723	0.0423729	-4.56071	0.00804377	Yes	0.281009	No	Down
XP_011087617	CDS_29816_Unigene_46707	CDS_21256_Unigene_34891	ATP-dependent Clp protease ATP-binding subunit clpX- mitochondrial	40.1663	1039.58	25.8818	4.69387	0.00805326	Yes	0.280752	No	Up
XP_011090656	CDS_36779_Unigene_56532	CDS_30460_Unigene_48324	argonaute 10	65.7267	1467.9	22.3333	4.48113	0.00807515	Yes	0.280928	No	Up
XP_011089856	CDS_7735_Unigene_15341	CDS_3665_Unigene_7199	PREDICTED: uncharacterized protein LOC105170683	806.065	27.3861	0.0339751	-4.87938	0.00810169	Yes	0.281264	No	Down
XP_011100076	CDS_26810_Unigene_42496	CDS_966_Unigene_2071	S-adenosylmethionine carrier chloroplastic mitochondrial	100.416	1992.61	19.8436	4.3106	0.00812257	Yes	0.281402	No	Up
XP_011092433	CDS_34668_Unigene_53753	CDS_29804_Unigene_47372	PREDICTED: BRCA1-associated protein	10.9545	358.211	32.7	5.03122	0.00812413	Yes	0.280873	No	Up
XP_012837038	CDS_305_Unigene_655	CDS_11445_Unigene_20515	BURP domain-containing 17-like	2093.21	107.354	0.0512865	-4.28528	0.00815608	Yes	0.281393	No	Down
XP_011100899	CDS_2775_Unigene_6356	CDS_25549_Unigene_41175	ABC transporter F family member 5	21433.3	1174.32	0.0547894	-4.18996	0.00816114	Yes	0.280986	No	Down
XP_011097261	CDS_32462_Unigene_50578	CDS_20929_Unigene_34419	PREDICTED: uncharacterized protein LOC105176226	1568.31	72.2994	0.0461001	-4.43909	0.0081904	Yes	0.281412	No	Down
XP_012858267	CDS_26579_Unigene_42188	CDS_12257_Unigene_21735	eukaryotic translation initiation factor 2 subunit alpha-like	1802.01	87.6356	0.0486322	-4.36194	0.00819524	Yes	0.280999	No	Down
XP_011077685	CDS_1612_Unigene_3647	CDS_14701_Unigene_25336	spermidine hydroxycinnamoyl transferase-like	35.602	951.942	26.7385	4.74084	0.00821335	Yes	0.281041	No	Up
XP_012856607	CDS_17003_Unigene_29042	CDS_17483_Unigene_29333	linoleate 13S-lipoxygenase 3- chloroplastic-like	77.594	1643.17	21.1765	4.40439	0.00823838	Yes	0.28132	No	Up
AIE89793	CDS_24679_Unigene_39615	CDS_6515_Unigene_12598	SQUAMOSA promoter binding -like partial	261.994	4105.73	15.6711	3.97003	0.00829118	Yes	0.282544	No	Up
XP_011096644	CDS_22593_Unigene_36744	CDS_2233_Unigene_4726	BREAST CANCER SUSCEPTIBILITY 1 homolog	1091.79	43.8178	0.0401338	-4.63904	0.00835707	Yes	0.284208	No	Down
XP_006288773	CDS_21396_Unigene_35090	CDS_11611_Unigene_20778	hypothetical protein CARUB_v10002094mg, partial	17409.4	1010	0.0580148	-4.10744	0.00840359	Yes	0.285208	No	Down
XP_011095746	CDS_5970_Unigene_12241	CDS_10813_Unigene_19421	cyclin-B3-1 isoform X2	673.699	21.9089	0.0325203	-4.94251	0.00848827	Yes	0.287497	No	Down
XP_011077284	CDS_27466_Unigene_43474	CDS_1232_Unigene_2768	ABC transporter G family member 24-like	586.976	18.6226	0.0317263	-4.97818	0.00860624	Yes	0.290902	No	Down
XP_011098293	CDS_14306_Unigene_25197	CDS_20354_Unigene_33524	probable bifunctional methylthioribulose-1-phosphate dehydratase enolase-phosphatase E1 isoform X3	4129.83	268.384	0.0649867	-3.94371	0.00863385	Yes	0.291244	No	Down
XP_012833998	CDS_22420_Unigene_36545	CDS_15418_Unigene_26461	kynurenine--oxoglutarate transaminase-like	197.18	7.66812	0.0388889	-4.6845	0.00867002	Yes	0.291873	No	Down
XP_012841353	CDS_6330_Unigene_12818	CDS_11856_Unigene_21137	vacuolar amino acid transporter 1	20.0832	614.545	30.6	4.93546	0.0087327	Yes	0.29339	No	Up
XP_011084487	CDS_1724_Unigene_4017	CDS_12489_Unigene_22073	RNA polymerase sigma factor chloroplastic mitochondrial-like	46.5564	1110.78	23.8588	4.57645	0.00883318	Yes	0.296169	No	Up
XP_012845929	CDS_24626_Unigene_39517	CDS_14382_Unigene_24882	probable LRR receptor-like serine threonine- kinase At3g47570	3377.62	210.325	0.0622703	-4.00531	0.0088622	Yes	0.296545	No	Down
XP_011083933	CDS_2255_Unigene_5079	CDS_7891_Unigene_14826	PREDICTED: uncharacterized protein LOC105166323	37.4277	956.324	25.5512	4.67532	0.00887865	Yes	0.296501	No	Up
XP_011095995	CDS_198_Unigene_448	CDS_10324_Unigene_18615	PREDICTED: uncharacterized protein LOC105175296	8390.2	566.345	0.0675008	-3.88895	0.00888048	Yes	0.295969	No	Down
XP_011081190	CDS_20566_Unigene_33868	CDS_15249_Unigene_26208	PREDICTED: uncharacterized protein LOC105164273	1729.89	86.5402	0.0500264	-4.32117	0.00894854	Yes	0.297642	No	Down
EYU41656	CDS_7025_Unigene_14002	CDS_6338_Unigene_12349	hypothetical protein MIMGU_mgv1a026579mg	18.2574	557.582	30.54	4.93263	0.00900556	Yes	0.298941	No	Up
XP_011091183	CDS_8974_Unigene_17414	CDS_9963_Unigene_18015	1-aminocyclopropane-1-carboxylate oxidase homolog 1-like isoform X1	803.326	12529.7	15.5973	3.96322	0.00906061	Yes	0.300171	No	Up
XP_008465985	CDS_778_Unigene_1906	CDS_5899_Unigene_11690	E3 ubiquitin- ligase Os04g0590900-like	1217.77	53.6768	0.044078	-4.5038	0.00907997	Yes	0.300215	No	Down
XP_011069695	CDS_15259_Unigene_26502	CDS_26823_Unigene_43007	inactive poly [ADP-ribose] polymerase RCD1 isoform X1	1734.45	87.6356	0.0505263	-4.30682	0.00911093	Yes	0.300643	No	Down
XP_011069791	CDS_17790_Unigene_30120	CDS_15913_Unigene_27149	zinc finger ZAT10-like	287.554	4281	14.8876	3.89604	0.00913028	Yes	0.300686	No	Up
XP_011072419	CDS_18146_Unigene_30590	CDS_9796_Unigene_17743	intracellular transport USO1-like	1230.55	54.7723	0.0445104	-4.48971	0.00917347	Yes	0.301512	No	Down
XP_011092750	CDS_13641_Unigene_24212	CDS_5506_Unigene_10849	transmembrane 45B	7.30297	146.79	20.1	4.32912	0.00928708	Yes	0.304645	No	Up
XP_011085891	CDS_9187_Unigene_17758	CDS_11737_Unigene_20966	pre-mRNA-splicing factor 38B-like	124.15	2216.09	17.85	4.15785	0.00936427	Yes	0.306574	No	Up
XP_011090445	CDS_10301_Unigene_19451	CDS_10106_Unigene_18241	cellulose synthase A catalytic subunit 2 [UDP-forming]	822.497	30.6725	0.0372919	-4.74499	0.00936946	Yes	0.306143	No	Down
XP_011100590	CDS_35137_Unigene_54387	CDS_30967_Unigene_49032	PREDICTED: protein GIGANTEA-like	1516.28	27456.2	18.1076	4.17853	0.00939675	Yes	0.306433	No	Up
XP_011090683	CDS_15939_Unigene_27514	CDS_20046_Unigene_33032	PREDICTED: myosin-9-like	77.594	1565.39	20.1741	4.33443	0.00940694	Yes	0.306167	No	Up
XP_011077816	CDS_21162_Unigene_34746	CDS_21572_Unigene_35334	UPF0554 isoform X2	879.095	33.9588	0.0386293	-4.69416	0.00943824	Yes	0.306586	No	Down
AKA27888	CDS_39756_Unigene_62391	CDS_21181_Unigene_34801	WRKY protein	10.0416	281.529	28.0364	4.80923	0.00944602	Yes	0.306242	No	Up
XP_011070903	CDS_38924_Unigene_60033	CDS_3244_Unigene_6519	cytosolic sulfotransferase 12-like	12.7802	383.406	30	4.90689	0.00948811	Yes	0.307009	No	Up
EYU30284	CDS_24622_Unigene_39515	CDS_5023_Unigene_9738	hypothetical protein MIMGU_mgv1a000542mg	1514.45	74.4903	0.0491863	-4.3456	0.0095517	Yes	0.308468	No	Down
XP_011088507	CDS_11145_Unigene_20669	CDS_16023_Unigene_27328	PREDICTED: uncharacterized protein LOC105169716 isoform X2	24.6475	690.13	28	4.80735	0.00964997	Yes	0.311039	No	Up
XP_011077263	CDS_7885_Unigene_15608	CDS_33470_Unigene_53420	probable galacturonosyltransferase-like 3	2116.95	118.308	0.0558862	-4.16137	0.00966564	Yes	0.310943	No	Down
XP_011077758	CDS_27037_Unigene_42805	CDS_32198_Unigene_50769	ubiquitin carboxyl-terminal hydrolase 12-like isoform X1	450.958	6322.91	14.0211	3.80952	0.00971052	Yes	0.311785	No	Up
XP_012838311	CDS_38382_Unigene_58750	CDS_11598_Unigene_20762	ferritin- chloroplastic-like	2209.15	125.976	0.0570248	-4.13227	0.00977757	Yes	0.313333	No	Down
XP_011075789	CDS_5937_Unigene_12189	CDS_132_Unigene_325	target of Myb 1	3405.01	222.375	0.0653083	-3.93659	0.00980006	Yes	0.313452	No	Down
AKA27885	CDS_22311_Unigene_36390	CDS_16951_Unigene_28607	WRKY protein	247.388	3692.75	14.9269	3.89985	0.00984167	Yes	0.314179	No	Up
XP_011080608	CDS_39168_Unigene_60761	CDS_11449_Unigene_20521	mediator of RNA polymerase II transcription subunit 34-like	882.746	35.0542	0.0397104	-4.65434	0.00987384	Yes	0.314603	No	Down
EYU28061	CDS_13835_Unigene_24498	CDS_7923_Unigene_14878	hypothetical protein MIMGU_mgv11b014990mg	31.0376	807.343	26.0118	4.70109	0.00988674	Yes	0.314413	No	Up
EYU25220	CDS_26888_Unigene_42622	CDS_23376_Unigene_38023	hypothetical protein MIMGU_mgv1a011390mg	37.4277	913.601	24.4098	4.60939	0.0100214	Yes	0.31809	No	Up
XP_011100361	CDS_14457_Unigene_25434	CDS_10924_Unigene_19594	O-acyltransferase WSD1-like	181.661	2884.31	15.8774	3.9889	0.0100668	Yes	0.318921	No	Up
XP_011091791	CDS_5000_Unigene_10626	CDS_3570_Unigene_7065	pentatricopeptide repeat-containing At4g20740	20.996	593.731	28.2783	4.82162	0.0100763	Yes	0.318618	No	Up
XP_011089706	CDS_12920_Unigene_23189	CDS_4495_Unigene_8801	YTH domain-containing family 1-like	164.317	2668.5	16.24	4.02148	0.0100813	Yes	0.318171	No	Up
XP_011092579	CDS_15983_Unigene_27579	CDS_17776_Unigene_29815	PREDICTED: uncharacterized protein LOC105172725 isoform X2	794.198	30.6725	0.0386207	-4.69448	0.0102248	Yes	0.322089	No	Down
XP_011074362	CDS_26492_Unigene_42066	CDS_933_Unigene_2029	interferon-related developmental regulator 1	314.94	4416.83	14.0243	3.80986	0.010326	Yes	0.324666	No	Up
XP_012831708	CDS_26513_Unigene_42100	CDS_1808_Unigene_3867	PREDICTED: protein TPX2	885.485	36.1497	0.0408247	-4.61441	0.0103403	Yes	0.324503	No	Down
XP_011076917	CDS_5930_Unigene_12174	CDS_10788_Unigene_19394	PREDICTED: uncharacterized protein LOC105161049	4936.81	358.211	0.0725592	-3.7847	0.0103427	Yes	0.323966	No	Down
XP_011086520	CDS_39289_Unigene_60984	CDS_34043_Unigene_54507	MLP 423	438.178	5974.56	13.635	3.76924	0.0103499	Yes	0.323586	No	Up
XP_011082632	CDS_10129_Unigene_19186	CDS_32844_Unigene_51928	PREDICTED: ankyrin-2-like	36.5148	886.215	24.27	4.6011	0.0103812	Yes	0.323957	No	Up
XP_011101527	CDS_10936_Unigene_20374	CDS_11036_Unigene_19784	pentatricopeptide repeat-containing At5g37570	108.632	6.57267	0.0605042	-4.04682	0.0103864	Yes	0.323512	No	Down
XP_011087464	CDS_23020_Unigene_37304	CDS_18117_Unigene_30271	PREDICTED: uncharacterized protein LOC105168944 isoform X3	2211.89	130.358	0.0589352	-4.08473	0.0104628	Yes	0.325283	No	Down
XP_012835351	CDS_22976_Unigene_37258	CDS_21150_Unigene_34756	ATP-dependent Clp protease proteolytic subunit-related chloroplastic	1363.83	22365.7	16.3992	4.03555	0.010542	Yes	0.327136	No	Up
XP_011101265	CDS_34303_Unigene_53226	CDS_1219_Unigene_2724	PREDICTED: uncharacterized protein LOC105179348 isoform X4	527.639	18.6226	0.0352941	-4.82443	0.0105459	Yes	0.326647	No	Down
XP_011074721	CDS_11645_Unigene_21385	CDS_13826_Unigene_24052	phospholipase D delta-like	36.5148	880.738	24.12	4.59216	0.0105487	Yes	0.32613	No	Up
XP_011082674	CDS_219_Unigene_475	CDS_482_Unigene_1040	3-deoxy-manno-octulosonate mitochondrial	62.9881	1284.96	20.4	4.3505	0.0105916	Yes	0.326848	No	Up
XP_011081107	CDS_2418_Unigene_5576	CDS_14148_Unigene_24505	methylsterol monooxygenase 1-1-like	327.721	4522	13.7983	3.78642	0.0106152	Yes	0.326973	No	Up
XP_011102085	CDS_26363_Unigene_41890	CDS_20616_Unigene_33934	BTB POZ domain-containing At4g08455-like	1327.31	65.7267	0.0495186	-4.33589	0.0106351	Yes	0.326979	No	Down
XP_012838862	CDS_5384_Unigene_11289	CDS_5940_Unigene_11747	PREDICTED: protein SABRE	97.6772	1766.95	18.0897	4.1771	0.0107119	Yes	0.328734	No	Up
XP_011072453	CDS_39029_Unigene_60578	CDS_3620_Unigene_7139	GDSL esterase lipase APG	12298.2	851.161	0.0692102	-3.85287	0.0107234	Yes	0.328483	No	Down
XP_011085751	CDS_2621_Unigene_6050	CDS_4799_Unigene_9326	cyclic dof factor 2-like	17.3445	483.091	27.8526	4.79974	0.0107665	Yes	0.329199	No	Up
XP_011075760	CDS_38181_Unigene_58483	CDS_21380_Unigene_35070	PREDICTED: uncharacterized protein LOC105160191	1689.72	92.0174	0.0544571	-4.19874	0.0107865	Yes	0.329205	No	Down
XP_011090721	CDS_18101_Unigene_30530	CDS_6905_Unigene_13275	PREDICTED: uncharacterized protein LOC105171345	18.2574	506.096	27.72	4.79286	0.0107875	Yes	0.328634	No	Up
XP_011069529	CDS_18735_Unigene_31370	CDS_7149_Unigene_13645	F-box 7	173.445	2709.04	15.6189	3.96523	0.0108562	Yes	0.330125	No	Up
XP_012849164	CDS_25464_Unigene_40653	CDS_12588_Unigene_22218	CRIB domain-containing RIC10-like	58.4237	1203.89	20.6062	4.36501	0.0108948	Yes	0.330693	No	Up
XP_011084709	CDS_37150_Unigene_57056	CDS_31590_Unigene_49902	type II inositol 1,4,5-trisphosphate 5-phosphatase FRA3	170.707	2670.7	15.6449	3.96762	0.0109156	Yes	0.330723	No	Up
XP_011097425	CDS_29877_Unigene_46786	CDS_1980_Unigene_4301	ATP-dependent RNA helicase DB10	1135.61	53.6768	0.0472669	-4.40303	0.0109417	Yes	0.330911	No	Down
XP_012850741	CDS_14521_Unigene_25533	CDS_11548_Unigene_20677	PREDICTED: uncharacterized protein LOC105970461 isoform X1	2829.9	184.035	0.0650323	-3.9427	0.010951	Yes	0.330592	No	Down
XP_011092161	CDS_28191_Unigene_44486	CDS_24868_Unigene_40224	NHL repeat-containing 2	237.346	3440.79	14.4969	3.85767	0.0109687	Yes	0.330528	No	Up
XP_011082032	CDS_33770_Unigene_52523	CDS_29786_Unigene_47323	ubiquitin carboxyl-terminal hydrolase 18	3450.65	238.807	0.0692063	-3.85295	0.0110509	Yes	0.332406	No	Down
XP_012836911	CDS_25441_Unigene_40625	CDS_25788_Unigene_41519	D-3-phosphoglycerate dehydrogenase chloroplastic	395.273	5259.23	13.3053	3.73393	0.0110532	Yes	0.331875	No	Up
XP_011081633	CDS_27861_Unigene_44055	CDS_19969_Unigene_32932	auxin-responsive IAA26-like	1790.14	100.781	0.0562978	-4.15078	0.0110623	Yes	0.33155	No	Down
XP_012848819	CDS_24355_Unigene_39128	CDS_12578_Unigene_22205	TRANSPARENT TESTA 12-like	11.8673	311.106	26.2154	4.71234	0.0111492	Yes	0.333556	No	Up
XP_011083946	CDS_31612_Unigene_49293	CDS_28669_Unigene_45695	transcription factor GTE10-like	93.1128	1679.32	18.0353	4.17275	0.011172	Yes	0.333638	No	Up
EYU24356	CDS_12319_Unigene_22369	CDS_7144_Unigene_13633	hypothetical protein MIMGU_mgv1a022056mg	283.903	10.9545	0.0385852	-4.69581	0.0112322	Yes	0.334836	No	Down
XP_011099316	CDS_14955_Unigene_26099	CDS_13200_Unigene_23116	probable receptor kinase At5g24010	2790.65	182.939	0.0655545	-3.93116	0.0112402	Yes	0.334477	No	Down
CAA38906	CDS_38195_Unigene_58498	CDS_26763_Unigene_42919	partial	1760.93	99.6855	0.0566096	-4.14281	0.0113165	Yes	0.336147	No	Down
AEQ54920	CDS_7145_Unigene_14244	CDS_5713_Unigene_11268	galactinol synthase 2	331.372	4447.51	13.4215	3.74647	0.0113884	Yes	0.33768	No	Up
XP_011087634	CDS_19485_Unigene_32413	CDS_19132_Unigene_31667	FAR1-RELATED SEQUENCE 11	187.139	8.76356	0.0468293	-4.41645	0.0114058	Yes	0.337594	No	Down
XP_011071764	CDS_29038_Unigene_45585	CDS_24932_Unigene_40308	PREDICTED: uncharacterized protein LOC105157153	1711.63	96.3992	0.05632	-4.15021	0.0114281	Yes	0.337656	No	Down
XP_011074308	CDS_30707_Unigene_48016	CDS_21338_Unigene_35006	probable inactive poly [ADP-ribose] polymerase SRO3	60.2495	1207.18	20.0364	4.32455	0.0114629	Yes	0.338085	No	Up
O04111	CDS_8957_Unigene_17385	CDS_662_Unigene_1540	CHSY_PERFR ame: Full=Chalcone synthase ame: Full=Naringenin-chalcone synthase	73.9425	1399.98	18.9333	4.24286	0.0115279	Yes	0.339401	No	Up
XP_011072520	CDS_22910_Unigene_37160	CDS_1845_Unigene_3968	receptor-like serine threonine- kinase ALE2	23.7346	615.64	25.9385	4.69702	0.0115324	Yes	0.338936	No	Up
XP_011089036	CDS_2963_Unigene_6697	CDS_33200_Unigene_52745	PREDICTED: uncharacterized protein LOC105170116	275.687	3804.48	13.8	3.7866	0.0115388	Yes	0.338525	No	Up
XP_011088787	CDS_9739_Unigene_18571	CDS_3425_Unigene_6823	alpha-L-fucosidase 1	69.3782	1334.25	19.2316	4.26541	0.011558	Yes	0.338494	No	Up
XP_011096395	CDS_36047_Unigene_55554	CDS_17538_Unigene_29413	phosphoinositide phosphatase SAC1 isoform X4	169.794	2603.87	15.3355	3.9388	0.0115755	Yes	0.338412	No	Up
XP_012841971	CDS_35183_Unigene_54454	CDS_31352_Unigene_49554	STRUBBELIG-RECEPTOR FAMILY 8	171.62	2623.59	15.2872	3.93426	0.0115981	Yes	0.338479	No	Up
XP_011086670	CDS_20904_Unigene_34326	CDS_17640_Unigene_29568	PREDICTED: uncharacterized protein LOC105168326	33.7762	802.961	23.773	4.57125	0.0116118	Yes	0.338284	No	Up
XP_011085319	CDS_14221_Unigene_25064	CDS_6534_Unigene_12624	STICHEL-like 4	76.6812	1433.94	18.7	4.22497	0.0116157	Yes	0.337809	No	Up
EYU40384	CDS_12598_Unigene_22777	CDS_8641_Unigene_15960	hypothetical protein MIMGU_mgv1a020875mg, partial	314.94	12.0499	0.0382609	-4.70799	0.0116322	Yes	0.337699	No	Down
XP_011090917	CDS_14498_Unigene_25501	CDS_13052_Unigene_22886	chromatin-remodeling complex ATPase chain	7591.43	579.49	0.0763348	-3.71152	0.0116385	Yes	0.337293	No	Down
EYU34259	CDS_19203_Unigene_32023	CDS_3349_Unigene_6696	hypothetical protein MIMGU_mgv1a018251mg, partial	625.317	24.0998	0.0385401	-4.69749	0.0116571	Yes	0.337246	No	Down
AJD25221	CDS_6359_Unigene_12867	CDS_32441_Unigene_51062	cytochrome P450 CYP94C54	57.5109	1156.79	20.1143	4.33015	0.011752	Yes	0.339403	No	Up
XP_011089957	CDS_4463_Unigene_9595	CDS_12130_Unigene_21532	PREDICTED: uncharacterized protein LOC105170752	17.3445	458.992	26.4632	4.72591	0.0117674	Yes	0.339259	No	Up
XP_011099832	CDS_10613_Unigene_19893	CDS_1759_Unigene_3743	PREDICTED: LOW QUALITY PROTEIN: uncharacterized protein LOC105178147	183.487	2748.47	14.9791	3.90488	0.011769	Yes	0.33872	No	Up
XP_011082617	CDS_12849_Unigene_23101	CDS_2177_Unigene_4635	histone H1-like	13956.9	983.71	0.070482	-3.8266	0.0118249	Yes	0.339742	No	Down
XP_011077570	CDS_10323_Unigene_19485	CDS_5146_Unigene_9953	endochitinase A1-like isoform X2	1084.49	52.5814	0.0484848	-4.36632	0.0119007	Yes	0.341331	No	Down
XP_011079399	CDS_30079_Unigene_47091	CDS_3634_Unigene_7158	serine carboxypeptidase 24	1331.88	70.1085	0.0526388	-4.24773	0.0119245	Yes	0.341425	No	Down
EYU29383	CDS_2808_Unigene_6399	CDS_5057_Unigene_9802	hypothetical protein MIMGU_mgv1a014049mg	17585.5	1192.94	0.0678364	-3.8818	0.0119828	Yes	0.342508	No	Down
XP_011084141	CDS_35862_Unigene_55339	CDS_29979_Unigene_47657	transport SEC23-like	469.216	6008.52	12.8054	3.67869	0.0119986	Yes	0.34237	No	Up
AAG43519	CDS_39166_Unigene_60759	CDS_32693_Unigene_51745	AF210699_1granule-bound starch synthase	3342.93	74937.2	22.4166	4.4865	0.0120018	Yes	0.341876	No	Up
XP_012829248	CDS_14178_Unigene_25006	CDS_1558_Unigene_3448	late blight resistance homolog R1A-3	429.049	5496.94	12.8119	3.67941	0.0120031	Yes	0.341331	No	Up
XP_011093622	CDS_32954_Unigene_51283	CDS_26559_Unigene_42651	probable lactoylglutathione chloroplast	7599.65	588.254	0.0774054	-3.69142	0.0120271	Yes	0.34143	No	Down
XP_011081019	CDS_15358_Unigene_26665	CDS_526_Unigene_1154	PREDICTED: uncharacterized protein LOC105164138	681.915	27.3861	0.0401606	-4.63807	0.012031	Yes	0.340961	No	Down
XP_011072950	CDS_2481_Unigene_5744	CDS_33456_Unigene_53408	PREDICTED: uncharacterized protein LOC105158039	14.6059	377.929	25.875	4.69349	0.0120849	Yes	0.341906	No	Up
XP_011080882	CDS_17408_Unigene_29601	CDS_2982_Unigene_5931	PREDICTED: uncharacterized protein At5g41620-like	757.683	31.7679	0.0419277	-4.57595	0.0121674	Yes	0.343657	No	Down
XP_012843373	CDS_28723_Unigene_45200	CDS_19193_Unigene_31764	callose synthase 7-like	29.2119	707.658	24.225	4.59842	0.0121868	Yes	0.343621	No	Up
XP_011070848	CDS_23911_Unigene_38513	CDS_26341_Unigene_42296	PREDICTED: uncharacterized protein LOC105156425 isoform X2	1089.06	53.6768	0.0492875	-4.34263	0.0122232	Yes	0.344067	No	Down
XP_012829753	CDS_23766_Unigene_38288	CDS_20366_Unigene_33544	PHLOEM PROTEIN 2-LIKE A1-like	4570.74	353.829	0.0774116	-3.69131	0.0123155	Yes	0.34608	No	Down
XP_011090144	CDS_5386_Unigene_11292	CDS_3302_Unigene_6625	PREDICTED: uncharacterized protein LOC105170911	53.8594	1081.2	20.0746	4.3273	0.0124341	Yes	0.348825	No	Up
XP_011082052	CDS_6266_Unigene_12704	CDS_29684_Unigene_47174	UDP-glycosyltransferase 74F2-like	141.495	2205.13	15.5845	3.96204	0.0124639	Yes	0.349074	No	Up
XP_011100908	CDS_12377_Unigene_22460	CDS_34379_Unigene_55215	iron-sulfur assembly chloroplastic	1198.6	17223.7	14.3698	3.84497	0.0125711	Yes	0.351484	No	Up
XP_011094981	CDS_6702_Unigene_13462	CDS_7713_Unigene_14538	NRT1 PTR FAMILY -like isoform X1	1537.27	87.6356	0.0570071	-4.13271	0.0126124	Yes	0.352049	No	Down
XP_012827874	CDS_17259_Unigene_29396	CDS_10449_Unigene_18869	PREDICTED: uncharacterized protein YKR070W-like isoform X2	502.992	19.718	0.0392015	-4.67295	0.0126412	Yes	0.352261	No	Down
XP_011092122	CDS_16552_Unigene_28406	CDS_12307_Unigene_21828	importin subunit alpha-1	3011.56	213.612	0.0709306	-3.81745	0.0126979	Yes	0.353252	No	Down
XP_011074291	CDS_38358_Unigene_58720	CDS_7425_Unigene_14039	PREDICTED: uncharacterized protein LOC105159055	252.865	10.9545	0.0433213	-4.52878	0.0126995	Yes	0.352707	No	Down
XP_011087725	CDS_3649_Unigene_7915	CDS_2801_Unigene_5619	ATP-dependent DNA helicase Q-like 4A	816.107	36.1497	0.0442953	-4.4967	0.012702	Yes	0.352191	No	Down
XP_012839232	CDS_35473_Unigene_54869	CDS_31248_Unigene_49396	exocyst complex component SEC5A-like	3782.02	285.911	0.0755974	-3.72552	0.0127471	Yes	0.352852	No	Down
XP_012836697	CDS_15273_Unigene_26537	CDS_22509_Unigene_36676	3-phosphoinositide-dependent kinase 2-like	91.2871	1574.15	17.244	4.10802	0.0127667	Yes	0.352811	No	Up
XP_011089575	CDS_14723_Unigene_25815	CDS_12497_Unigene_22086	ubiquitin carboxyl-terminal hydrolase 5	69.3782	1280.58	18.4579	4.20617	0.0128464	Yes	0.354424	No	Up
XP_011095772	CDS_14845_Unigene_25966	CDS_9984_Unigene_18047	probable serine threonine- kinase At1g09600	418.095	16.4317	0.0393013	-4.66928	0.012855	Yes	0.354076	No	Down
ACN94267	CDS_11636_Unigene_21373	CDS_14137_Unigene_24479	chloroplast ribulose-1,5-bisphosphate carboxylase oxygenase activase	12377.6	907624	73.3279	6.19629	0.0129685	Yes	0.356611	No	Up
XP_011082558	CDS_22282_Unigene_36361	CDS_9424_Unigene_17165	mitochondrial ribosome-associated GTPase 1	178.01	2577.58	14.48	3.85599	0.0131579	Yes	0.361223	No	Up
XP_011071763	CDS_963_Unigene_2236	CDS_10284_Unigene_18544	lipase-like PAD4	13.6931	326.443	23.84	4.57531	0.013324	Yes	0.365182	No	Up
XP_011089617	CDS_19372_Unigene_32274	CDS_20902_Unigene_34368	serine carboxypeptidase 1	19.1703	468.851	24.4571	4.61218	0.0133934	Yes	0.366482	No	Up
XP_011096814	CDS_398_Unigene_900	CDS_32902_Unigene_52007	stromal 70 kDa heat shock-related chloroplastic-like	56.598	1087.78	19.2194	4.26449	0.0134072	Yes	0.366259	No	Up
XP_011095913	CDS_7904_Unigene_15668	CDS_916_Unigene_2007	oligopeptide transporter 3	3124.76	60853.1	19.4745	4.28351	0.0134297	Yes	0.366272	No	Up
XP_011070091	CDS_14096_Unigene_24892	CDS_3798_Unigene_7392	G2 mitotic-specific cyclin-1-like	1771.88	109.545	0.0618238	-4.01569	0.0134346	Yes	0.365808	No	Down
XP_012855384	CDS_842_Unigene_2061	CDS_3158_Unigene_6350	DNA (cytosine-5)-methyltransferase 1-like	2902.93	209.23	0.0720755	-3.79435	0.0134444	Yes	0.365478	No	Down
XP_011097195	CDS_23440_Unigene_37876	CDS_4030_Unigene_7771	PREDICTED: uncharacterized protein LOC105176169 isoform X1	61.1624	1148.03	18.7701	4.23037	0.0134453	Yes	0.364908	No	Up
XP_011094992	CDS_2122_Unigene_4790	CDS_29743_Unigene_47259	RNA polymerase II C-terminal domain phosphatase-like 2	102.242	1678.22	16.4143	4.03688	0.0134751	Yes	0.365121	No	Up
XP_011072775	CDS_23738_Unigene_38232	CDS_17559_Unigene_29456	PREDICTED: uncharacterized protein LOC105157935	343.239	14.2408	0.0414894	-4.59111	0.0136593	Yes	0.369512	No	Down
XP_011073684	CDS_8697_Unigene_16974	CDS_5848_Unigene_11547	PREDICTED: protein SHORT-ROOT-like	20.996	505	24.0522	4.5881	0.013665	Yes	0.369067	No	Up
XP_012845870	CDS_10850_Unigene_20253	CDS_3917_Unigene_7591	PREDICTED: uncharacterized protein LOC105965867	639.01	27.3861	0.0428571	-4.54432	0.0138122	Yes	0.372437	No	Down
XP_011081293	CDS_16536_Unigene_28380	CDS_15755_Unigene_26920	palmitoyl- thioesterase 1-like	2160.77	144.599	0.0669202	-3.90142	0.0138198	Yes	0.372039	No	Down
XP_011093988	CDS_10630_Unigene_19914	CDS_9425_Unigene_17168	PREDICTED: uncharacterized protein LOC105173804	310.376	3921.69	12.6353	3.65939	0.0138343	Yes	0.371829	No	Up
XP_012836991	CDS_7116_Unigene_14182	CDS_14092_Unigene_24418	PREDICTED: uncharacterized protein LOC105957599	18.2574	432.701	23.7	4.56682	0.0141436	Yes	0.379531	No	Up
XP_011099715	CDS_16820_Unigene_28778	CDS_644_Unigene_1500	probable methyltransferase PMT26	13547	1039.58	0.0767385	-3.7039	0.0141565	Yes	0.379266	No	Down
XP_011102133	CDS_12233_Unigene_22252	CDS_17866_Unigene_29945	PREDICTED: uncharacterized protein LOC105180166	4222.03	342.874	0.0812108	-3.62218	0.0141777	Yes	0.379226	No	Down
AIE15763	CDS_13275_Unigene_23700	CDS_18790_Unigene_31192	Dicer 1	196.267	2704.65	13.7805	3.78455	0.0141977	Yes	0.37915	No	Up
XP_011097190	CDS_31832_Unigene_49605	CDS_26896_Unigene_43123	3-ketoacyl- synthase 6-like	1160.26	15448	13.3142	3.7349	0.0142398	Yes	0.379668	No	Up
XP_011091656	CDS_10290_Unigene_19434	CDS_9931_Unigene_17961	zinc transporter At3g08650	1219.6	69.013	0.0565868	-4.14339	0.0145045	Yes	0.386108	No	Down
XP_011083507	CDS_31049_Unigene_48514	CDS_4844_Unigene_9421	auxin response factor 5	1275.28	73.3948	0.0575519	-4.11899	0.0145333	Yes	0.386258	No	Down
XP_011087488	CDS_12204_Unigene_22210	CDS_13304_Unigene_23275	nicotianamine synthase-like	42.9049	867.593	20.2213	4.3378	0.0145663	Yes	0.386517	No	Up
XP_011084078	CDS_38346_Unigene_58697	CDS_9779_Unigene_17722	pyrophosphate-energized vacuolar membrane proton pump-like	226.392	2992.76	13.2194	3.72458	0.0146115	Yes	0.387099	No	Up
XP_011096407	CDS_23864_Unigene_38440	CDS_16621_Unigene_28165	PREDICTED: uncharacterized protein LOC105175607	3189.57	245.38	0.0769319	-3.70027	0.0146153	Yes	0.386586	No	Down
XP_011086859	CDS_31147_Unigene_48627	CDS_21622_Unigene_35420	serine threonine- phosphatase PP2A-2 catalytic subunit	577.847	6821.34	11.8047	3.56129	0.0146299	Yes	0.386359	No	Up
XP_011081327	CDS_108_Unigene_248	CDS_8864_Unigene_16320	pentatricopeptide repeat-containing mitochondrial	26.4733	598.113	22.5931	4.49781	0.0146696	Yes	0.386795	No	Up
XP_011077579	CDS_20485_Unigene_33750	CDS_13229_Unigene_23160	PREDICTED: uncharacterized protein LOC105161555	320.418	3932.65	12.2735	3.61748	0.0147409	Yes	0.38806	No	Up
XP_011086517	CDS_34043_Unigene_52883	CDS_28467_Unigene_45427	PREDICTED: uncharacterized protein LOC105168222 isoform X3	553.2	24.0998	0.0435644	-4.52071	0.0147773	Yes	0.388406	No	Down
XP_011082569	CDS_18149_Unigene_30596	CDS_29493_Unigene_46904	pre-mRNA-splicing factor 18	178.01	2464.75	13.8462	3.79141	0.0148566	Yes	0.389875	No	Up
XP_011082219	CDS_16365_Unigene_28169	CDS_1876_Unigene_4048	PREDICTED: uncharacterized protein LOC105165040	828.887	40.5315	0.0488987	-4.35406	0.0149067	Yes	0.390574	No	Down
XP_011069784	CDS_20432_Unigene_33696	CDS_9308_Unigene_16986	oligopeptide transporter 5-like	196.267	2653.17	13.5181	3.75682	0.0149547	Yes	0.391217	No	Up
XP_011088416	CDS_19914_Unigene_33016	CDS_18963_Unigene_31451	PREDICTED: uncharacterized protein LOC105169651	1148.39	14849.9	12.931	3.69276	0.0149569	Yes	0.39066	No	Up
XP_011078544	CDS_107_Unigene_244	CDS_34087_Unigene_54568	PREDICTED: uncharacterized protein LOC105162245	25.5604	574.013	22.4571	4.4891	0.0149675	Yes	0.390327	No	Up
XP_012858596	CDS_32764_Unigene_51044	CDS_20910_Unigene_34380	beta-hexosaminidase 1	344.152	4148.45	12.0541	3.59145	0.0149696	Yes	0.38977	No	Up
XP_011097335	CDS_19037_Unigene_31787	CDS_789_Unigene_1796	F-box At3g07870-like	691.043	31.7679	0.0459709	-4.44313	0.0150078	Yes	0.390155	No	Down
XP_011097361	CDS_30622_Unigene_47879	CDS_15281_Unigene_26258	E3 ubiquitin- ligase RGLG2-like	2649.15	196.085	0.0740179	-3.75598	0.0150221	Yes	0.389919	No	Down
XP_011074855	CDS_10606_Unigene_19884	CDS_10436_Unigene_18845	glutathione-specific gamma-glutamylcyclotransferase 2	2175.37	152.267	0.0699958	-3.83659	0.015088	Yes	0.391022	No	Down
XP_011091612	CDS_2267_Unigene_5128	CDS_3392_Unigene_6769	chromosome-associated kinesin KIF4-like	2328.73	166.508	0.0715014	-3.80589	0.0151054	Yes	0.390864	No	Down
XP_012831599	CDS_31388_Unigene_48962	CDS_12074_Unigene_21457	MORC family CW-type zinc finger 3	885.485	44.9132	0.0507216	-4.30125	0.0151419	Yes	0.3912	No	Down
XP_011072894	CDS_9041_Unigene_17506	CDS_3569_Unigene_7063	exocyst complex component EXO70A1-like	36.5148	759.143	20.79	4.37782	0.0151993	Yes	0.392075	No	Up
XP_011070535	CDS_17203_Unigene_29321	CDS_17074_Unigene_28813	mediator of RNA polymerase II transcription subunit 27	105.893	1645.36	15.5379	3.95772	0.0152122	Yes	0.391803	No	Up
XP_011082378	CDS_14292_Unigene_25171	CDS_14119_Unigene_24450	UPF0503 chloroplastic-like	1068.06	59.154	0.0553846	-4.17437	0.015355	Yes	0.39487	No	Down
XP_011069884	CDS_34285_Unigene_53192	CDS_24825_Unigene_40157	lipase ROG1 isoform X3	281.164	13.1453	0.0467532	-4.41879	0.0153742	Yes	0.394754	No	Down
XP_011070479	CDS_39320_Unigene_61041	CDS_33754_Unigene_53804	high mobility group B 7-like	3478.04	280.434	0.0806299	-3.63254	0.015395	Yes	0.39468	No	Down
XP_011086850	CDS_14166_Unigene_24994	CDS_15371_Unigene_26397	pyruvate dehydrogenase E1 component subunit beta- mitochondrial-like	36.5148	753.666	20.64	4.36737	0.0154575	Yes	0.395673	No	Up
XP_011084275	CDS_28494_Unigene_44924	CDS_25537_Unigene_41162	glycine-rich RNA-binding RZ1C-like isoform X1	1750.89	116.117	0.0663191	-3.91443	0.0155648	Yes	0.397811	No	Down
XP_011072682	CDS_34694_Unigene_53784	CDS_27723_Unigene_44339	AT-rich interactive domain-containing 4	408.966	4739.99	11.5902	3.53483	0.0155718	Yes	0.39738	No	Up
EPS58636	CDS_12436_Unigene_22559	CDS_18768_Unigene_31161	hypothetical protein M569_16177	367.887	16.4317	0.044665	-4.48471	0.0156459	Yes	0.398658	No	Down
AIE15767	CDS_31238_Unigene_48773	CDS_1803_Unigene_3858	Dicer 4b	513.033	23.0043	0.0448399	-4.47907	0.0157211	Yes	0.399963	No	Down
XP_011075582	CDS_29256_Unigene_45959	CDS_8801_Unigene_16226	alpha-1,4 glucan phosphorylase L-2 chloroplastic amyloplastic-like	3600.36	295.77	0.0821501	-3.60559	0.0157357	Yes	0.399726	No	Down
XP_011096175	CDS_30340_Unigene_47496	CDS_5214_Unigene_10127	G-type lectin S-receptor-like serine threonine- kinase At1g11330	2105.08	148.981	0.0707719	-3.82068	0.0157548	Yes	0.399602	No	Down
XP_011089293	CDS_33933_Unigene_52751	CDS_28890_Unigene_46027	serine threonine- phosphatase 6 regulatory subunit 3-like isoform X2	324.982	3881.16	11.9427	3.57806	0.015766	Yes	0.399279	No	Up
XP_011075360	CDS_26701_Unigene_42371	CDS_4854_Unigene_9444	PREDICTED: uncharacterized protein LOC105159854	83.9841	1362.73	16.2261	4.02024	0.0157802	Yes	0.39903	No	Up
XP_011073246	CDS_4482_Unigene_9643	CDS_5835_Unigene_11522	ARF guanine-nucleotide exchange factor GNL2	46.5564	4.38178	0.0941176	-3.40939	0.0158163	Yes	0.399338	No	Down
XP_012839732	CDS_31941_Unigene_49758	CDS_4828_Unigene_9391	125 kDa kinesin-related	838.928	42.7224	0.0509249	-4.29548	0.0158576	Yes	0.399776	No	Down
XP_011087131	CDS_7936_Unigene_15723	CDS_6646_Unigene_12792	serine threonine phosphatase 2A 57 kDa regulatory subunit B iota isoform	1810.22	122.69	0.0677761	-3.88308	0.0159035	Yes	0.400327	No	Down
XP_011087396	CDS_13155_Unigene_23527	CDS_10370_Unigene_18715	60S ribosomal L31	12196	1004.52	0.0823653	-3.60182	0.0159094	Yes	0.399869	No	Down
XP_011070266	CDS_7931_Unigene_15715	CDS_5845_Unigene_11541	PREDICTED: uncharacterized protein LOC105155966 isoform X1	774.115	38.3406	0.0495283	-4.3356	0.0159568	Yes	0.400459	No	Down
XP_011086679	CDS_3162_Unigene_7072	CDS_4988_Unigene_9680	-tyrosine-phosphatase MKP1-like isoform X2	71.2039	1197.32	16.8154	4.07171	0.0160152	Yes	0.401318	No	Up
XP_002276171	CDS_36975_Unigene_56814	CDS_31211_Unigene_49341	receptor 12	1.82574	15.3362	8.4	3.07039	0.0160203	Yes	0.400844	No	Up
XP_011098412	CDS_19943_Unigene_33050	CDS_11_Unigene_29	heterogeneous nuclear ribonucleo 1-like	1261.59	76.6812	0.0607815	-4.04022	0.0162166	Yes	0.405147	No	Down
XP_011090242	CDS_10048_Unigene_19047	CDS_30645_Unigene_48586	serrate RNA effector molecule-like	194.442	2553.48	13.1324	3.71506	0.0162519	Yes	0.405422	No	Up
XP_011071331	CDS_19764_Unigene_32815	CDS_10208_Unigene_18428	PREDICTED: ycf20-like protein	231.869	12.0499	0.0519685	-4.26622	0.0163149	Yes	0.406384	No	Down
XP_011088229	CDS_11387_Unigene_21050	CDS_4929_Unigene_9596	CHROMATIN REMODELING 24	1617.61	107.354	0.0663657	-3.91342	0.0164023	Yes	0.407952	No	Down
AKN09561	CDS_17895_Unigene_30250	CDS_842_Unigene_1908	basic helix-loop-helix transcription factor	625.317	29.577	0.0472993	-4.40204	0.0164138	Yes	0.407631	No	Down
XP_011091175	CDS_12287_Unigene_22324	CDS_26843_Unigene_43043	ethylene receptor 2-like	109.545	1637.69	14.95	3.90207	0.0164569	Yes	0.408093	No	Up
XP_011095090	CDS_39530_Unigene_61758	CDS_32565_Unigene_51319	PREDICTED: uncharacterized protein LOC105174627	1512.63	98.5901	0.065178	-3.93947	0.0165299	Yes	0.409292	No	Down
XP_012852730	CDS_8269_Unigene_16218	CDS_32582_Unigene_51411	PREDICTED: uncharacterized protein LOC105972329	295.77	14.2408	0.0481481	-4.37638	0.0165564	Yes	0.409341	No	Down
XP_011092411	CDS_18840_Unigene_31521	CDS_11161_Unigene_20016	sulfate transporter -like	399.837	4534.05	11.3397	3.50331	0.0165911	Yes	0.409592	No	Up
ALT31532	CDS_486_Unigene_1051	CDS_2832_Unigene_5685	mediator of RNA polymerase II transcription subunit 20 partial	601.582	28.4816	0.0473445	-4.40066	0.0166267	Yes	0.409863	No	Down
XP_011071375	CDS_12244_Unigene_22265	CDS_1736_Unigene_3720	transcription factor bHLH148-like	150.624	2076.96	13.7891	3.78546	0.0166442	Yes	0.409689	No	Up
XP_011088032	CDS_11678_Unigene_21439	CDS_33530_Unigene_53490	serine threonine- kinase TOR	600.669	6694.27	11.1447	3.47828	0.0166871	Yes	0.410139	No	Up
XP_012838589	CDS_36494_Unigene_56156	CDS_28266_Unigene_45126	UPSTREAM OF FLC isoform X2	44.7307	845.684	18.9061	4.24078	0.0166882	Yes	0.409561	No	Up
BAA76429	CDS_12867_Unigene_23128	CDS_26620_Unigene_42716	polyubiquitin	501.166	5567.05	11.1082	3.47355	0.0166974	Yes	0.409184	No	Up
XP_012830284	CDS_23411_Unigene_37827	CDS_22553_Unigene_36750	PREDICTED: uncharacterized protein LOC105951404	70.2911	1166.65	16.5974	4.05289	0.016701	Yes	0.408671	No	Up
XP_011086107	CDS_16786_Unigene_28744	CDS_21062_Unigene_34635	stem-specific TSJT1-like	129.628	1845.83	14.2394	3.83182	0.0167969	Yes	0.410415	No	Up
XP_011096737	CDS_23361_Unigene_37750	CDS_16880_Unigene_28505	probable ribose-5-phosphate isomerase chloroplastic	24.6475	521.432	21.1556	4.40296	0.0168439	Yes	0.410962	No	Up
XP_011091193	CDS_11812_Unigene_21675	CDS_2675_Unigene_5430	1-aminocyclopropane-1-carboxylate oxidase homolog 1-like	113.196	1660.69	14.671	3.87489	0.0169256	Yes	0.412351	No	Up
XP_011101704	CDS_1751_Unigene_4112	CDS_3174_Unigene_6382	galactoside 2-alpha-L-fucosyltransferase-like	575.109	27.3861	0.047619	-4.39232	0.0169765	Yes	0.412988	No	Down
EYU39895	CDS_34887_Unigene_54061	CDS_30941_Unigene_49002	hypothetical protein MIMGU_mgv1a007607mg	13.6931	265.098	19.36	4.27501	0.0171017	Yes	0.415426	No	Up
XP_011074408	CDS_11151_Unigene_20689	CDS_28_Unigene_61	PREDICTED: cyclin-D3-3-like	209.047	2650.98	12.6812	3.66462	0.0171178	Yes	0.415213	No	Up
XP_011102057	CDS_29622_Unigene_46438	CDS_26281_Unigene_42238	UDP-sugar pyrophosphorylase	205.396	2602.78	12.672	3.66357	0.0173219	Yes	0.419554	No	Up
XP_011090016	CDS_1842_Unigene_4330	CDS_13411_Unigene_23418	low molecular weight phosphotyrosine phosphatase	1472.46	97.4946	0.066212	-3.91676	0.0173289	Yes	0.419113	No	Down
XP_011102248	CDS_22201_Unigene_36271	CDS_13841_Unigene_24074	PREDICTED: uncharacterized protein LOC105180271	18.2574	380.119	20.82	4.3799	0.0173514	Yes	0.419048	No	Up
XP_011100960	CDS_852_Unigene_2073	CDS_5027_Unigene_9741	salicylate carboxymethyltransferase-like	633.532	6948.41	10.9677	3.45519	0.0173791	Yes	0.419109	No	Up
XP_010259582	CDS_16023_Unigene_27626	CDS_6671_Unigene_12839	translationally-controlled tumor homolog	2200.02	166.508	0.0756846	-3.72386	0.0175769	Yes	0.423267	No	Down
XP_011080142	CDS_13101_Unigene_23454	CDS_2594_Unigene_5302	LOW PSII ACCUMULATION chloroplastic	381.58	4259.09	11.1617	3.48049	0.0175885	Yes	0.422936	No	Up
XP_012854550	CDS_12717_Unigene_22952	CDS_19124_Unigene_31661	MATE efflux family 5-like	0	6.57267	Inf	Inf	0.0176398	Yes	0.423559	No	Up
XP_011094919	CDS_5706_Unigene_11811	CDS_567_Unigene_1297	receptor kinase 1	337.762	16.4317	0.0486486	-4.36146	0.0176666	Yes	0.423592	No	Down
XP_012852161	CDS_16472_Unigene_28307	CDS_11203_Unigene_20084	structural maintenance of chromosomes 2-1	3311.9	281.529	0.0850055	-3.5563	0.0177445	Yes	0.424848	No	Down
AJD25244	CDS_38554_Unigene_59091	CDS_4942_Unigene_9620	cytochrome P450 CYP714A25	8.21584	95.3037	11.6	3.53605	0.0178257	Yes	0.42618	No	Up
XP_011070533	CDS_26456_Unigene_42009	CDS_23384_Unigene_38038	probable transmembrane ascorbate ferrireductase 3	753.119	39.436	0.0523636	-4.25529	0.0178448	Yes	0.426026	No	Down
XP_011082927	CDS_35748_Unigene_55198	CDS_24109_Unigene_39071	glycine--tRNA ligase mitochondrial-like	992.291	11306.1	11.3939	3.51019	0.0178482	Yes	0.425498	No	Up
XP_011075959	CDS_2083_Unigene_4708	CDS_33988_Unigene_54433	KH domain-containing At4g18375	162.491	2141.6	13.1798	3.72025	0.0179055	Yes	0.426253	No	Up
AEZ55675	CDS_2416_Unigene_5566	CDS_19836_Unigene_32688	mevalonate diphosphate decarboxylase	198.093	2497.61	12.6083	3.6563	0.0179194	Yes	0.425976	No	Up
XP_003635158	CDS_7905_Unigene_15668	CDS_915_Unigene_2007	oligopeptide transporter 3-like	255.604	3048.62	11.9271	3.57618	0.0180161	Yes	0.427665	No	Up
XP_012832120	CDS_40160_Unigene_63631	CDS_33439_Unigene_53393	uncharacterized acetyltransferase At3g50280	1547.32	106.258	0.0686726	-3.86412	0.0180236	Yes	0.427233	No	Down
XP_011086380	CDS_13462_Unigene_23945	CDS_26305_Unigene_42255	kinase chloroplastic	197.18	2482.28	12.5889	3.65408	0.0180401	Yes	0.427017	No	Up
XP_011075799	CDS_22614_Unigene_36764	CDS_23581_Unigene_38301	pentatricopeptide repeat-containing At5g27270	94.9386	1414.22	14.8962	3.89687	0.018156	Yes	0.42915	No	Up
XP_011095252	CDS_4709_Unigene_10067	CDS_10968_Unigene_19664	PREDICTED: uncharacterized protein LOC105174762	167.055	2175.55	13.023	3.70298	0.0181745	Yes	0.42898	No	Up
XP_011080978	CDS_21164_Unigene_34750	CDS_34048_Unigene_54512	auxin-induced 22C-like	339.588	3809.96	11.2194	3.48792	0.0182616	Yes	0.430425	No	Up
XP_011091487	CDS_31460_Unigene_49078	CDS_8936_Unigene_16444	uveal autoantigen with coiled-coil domains and ankyrin repeats	404.402	19.718	0.0487585	-4.3582	0.0182616	Yes	0.429819	No	Down
XP_011089218	CDS_1636_Unigene_3747	CDS_16764_Unigene_28345	cysteine-rich repeat secretory 55-like	19.1703	386.692	20.1714	4.33424	0.0183324	Yes	0.430877	No	Up
XP_012850674	CDS_9989_Unigene_18953	CDS_9707_Unigene_17617	plant intracellular Ras-group-related LRR 6	107.719	8.76356	0.0813559	-3.61961	0.0185788	Yes	0.436052	No	Down
XP_011089854	CDS_35110_Unigene_54352	CDS_12864_Unigene_22612	PREDICTED: uncharacterized protein LOC105170680 isoform X2	2547.82	207.039	0.0812612	-3.62129	0.0186772	Yes	0.437744	No	Down
XP_012849072	CDS_21294_Unigene_34931	CDS_4961_Unigene_9651	PREDICTED: uncharacterized protein LOC105968920	324.069	16.4317	0.0507042	-4.30175	0.0186863	Yes	0.437342	No	Down
XP_011084572	CDS_13711_Unigene_24312	CDS_11374_Unigene_20405	two-component response regulator-like APRR5	1126.48	71.2039	0.0632091	-3.98372	0.018799	Yes	0.439363	No	Down
XP_011074836	CDS_15709_Unigene_27176	CDS_9808_Unigene_17757	kinesin heavy chain	1011.46	61.3449	0.0606498	-4.04335	0.0188296	Yes	0.439462	No	Down
XP_011086888	CDS_34045_Unigene_52888	CDS_6290_Unigene_12275	E3 ubiquitin- ligase ORTHRUS 2-like	879.095	50.3905	0.0573209	-4.1248	0.0188472	Yes	0.439259	No	Down
XP_011084232	CDS_36071_Unigene_55579	CDS_31266_Unigene_49432	PREDICTED: uncharacterized protein LOC105166542 isoform X3	686.479	36.1497	0.0526596	-4.24716	0.0189243	Yes	0.440439	No	Down
AJD25206	CDS_32920_Unigene_51227	CDS_605_Unigene_1404	cytochrome P450 CYP85A1	685.566	36.1497	0.0527297	-4.24524	0.0189784	Yes	0.441082	No	Down
CDP06636	CDS_21330_Unigene_34983	CDS_21649_Unigene_35463	unnamed protein product	476.519	5024.81	10.5448	3.39846	0.0190349	Yes	0.441778	No	Up
XP_012850278	CDS_17478_Unigene_29689	CDS_2724_Unigene_5489	cation H(+) antiporter 20	532.204	5582.39	10.4892	3.39083	0.0190432	Yes	0.441358	No	Up
XP_011091270	CDS_19656_Unigene_32660	CDS_3938_Unigene_7629	PREDICTED: uncharacterized protein LOC105171755	33.7762	644.122	19.0703	4.25325	0.019082	Yes	0.441642	No	Up
XP_011093658	CDS_39469_Unigene_61670	CDS_5_Unigene_16	leucine-rich repeat extensin 4	3596.71	323.156	0.0898477	-3.47637	0.0191457	Yes	0.442503	No	Down
XP_011089542	CDS_23042_Unigene_37328	CDS_30987_Unigene_49064	PREDICTED: LOW QUALITY PROTEIN: uncharacterized protein LOC105170443	991.378	60.2495	0.0607735	-4.04041	0.0191733	Yes	0.442527	No	Down
XP_011077417	CDS_19729_Unigene_32754	CDS_15740_Unigene_26896	exocyst complex component EXO70A1-like	483.822	5080.67	10.5011	3.39247	0.0191768	Yes	0.441994	No	Up
XP_011094811	CDS_7030_Unigene_14012	CDS_5685_Unigene_11199	125 kDa kinesin-related	963.992	58.0586	0.0602273	-4.05344	0.0192525	Yes	0.443126	No	Down
XP_011096438	CDS_28913_Unigene_45433	CDS_27219_Unigene_43600	beta-galactosidase 8-like	1850.39	139.122	0.075185	-3.73341	0.0192675	Yes	0.44286	No	Down
XP_011087900	CDS_15754_Unigene_27245	CDS_31916_Unigene_50378	OBERON 4	518.511	5410.4	10.4345	3.38329	0.0193038	Yes	0.443083	No	Up
XP_011080755	CDS_27394_Unigene_43356	CDS_25509_Unigene_41117	exocyst complex component EXO70B1	255.604	2970.85	11.6229	3.53889	0.01931	Yes	0.442615	No	Up
XP_011074907	CDS_35837_Unigene_55305	CDS_4329_Unigene_8455	LRR receptor-like serine threonine- kinase GSO2 isoform X2	516.685	26.2907	0.0508834	-4.29666	0.0193419	Yes	0.442739	No	Down
XP_011073885	CDS_40438_Unigene_64053	CDS_1350_Unigene_3096	ENHANCED DISEASE RESISTANCE 2-like	117.76	1623.45	13.786	3.78514	0.0193796	Yes	0.442993	No	Up
XP_012836915	CDS_17332_Unigene_29481	CDS_17502_Unigene_29363	PREDICTED: uncharacterized protein LOC105957534 isoform X1	286.641	3245.8	11.3236	3.50126	0.0194446	Yes	0.443869	No	Up
XP_007042264	CDS_21248_Unigene_34852	CDS_23491_Unigene_38164	Thiamin biosynthesis isoform 3	839.841	48.1996	0.0573913	-4.12302	0.0194867	Yes	0.444221	No	Down
XP_011082613	CDS_21370_Unigene_35043	CDS_16135_Unigene_27465	probable folate-biopterin transporter 3	139.669	1843.63	13.2	3.72247	0.0195392	Yes	0.444811	No	Up
XP_011072490	CDS_15582_Unigene_26994	CDS_29416_Unigene_46779	inactive kinase SELMODRAFT_444075	254.691	2947.84	11.5742	3.53284	0.0195659	Yes	0.444811	No	Up
XP_011088969	CDS_31976_Unigene_49833	CDS_21002_Unigene_34557	transcription factor LHW	1157.52	75.5857	0.0652997	-3.93678	0.0195898	Yes	0.444748	No	Down
XP_011071203	CDS_22333_Unigene_36415	CDS_19098_Unigene_31616	ATP-dependent RNA helicase dhx8	20.0832	388.883	19.3636	4.27528	0.0196341	Yes	0.445145	No	Up
XP_011071514	CDS_969_Unigene_2245	CDS_3309_Unigene_6635	phosphomethylpyrimidine chloroplastic isoform X2	17387.5	1479.95	0.0851158	-3.55443	0.0196497	Yes	0.444895	No	Down
XP_011100001	CDS_32760_Unigene_51040	CDS_30204_Unigene_47969	ubiquitin carboxyl-terminal hydrolase 17-like	76.6812	1161.17	15.1429	3.92057	0.019846	Yes	0.44873	No	Up
XP_012846950	CDS_23966_Unigene_38576	CDS_26365_Unigene_42331	wall-associated receptor kinase-like 11	46.5564	808.438	17.3647	4.11809	0.0199253	Yes	0.449912	No	Up
XP_011077932	CDS_1699_Unigene_3930	CDS_32346_Unigene_50934	PREDICTED: uncharacterized protein LOC105161815	1650.47	19666.5	11.9157	3.57479	0.0199702	Yes	0.450315	No	Up
XP_011079668	CDS_32354_Unigene_50425	CDS_6133_Unigene_12018	probable GTP diphosphokinase chloroplastic	2622.68	35066.3	13.3704	3.74097	0.0200742	Yes	0.452048	No	Up
XP_011078241	CDS_37797_Unigene_57930	CDS_31810_Unigene_50226	probable serine threonine- kinase vps15	254.691	2918.27	11.4581	3.51829	0.0200979	Yes	0.451972	No	Up
XP_011092084	CDS_6513_Unigene_13105	CDS_33975_Unigene_54413	PREDICTED: uncharacterized protein LOC105172385	28.299	536.768	18.9677	4.24548	0.0201111	Yes	0.451659	No	Up
XP_011100648	CDS_23315_Unigene_37664	CDS_5598_Unigene_11032	type I inositol 1,4,5-trisphosphate 5-phosphatase 1-like isoform X2	2350.64	193.894	0.0824854	-3.59972	0.0201568	Yes	0.452076	No	Down
XP_011096142	CDS_1184_Unigene_2641	CDS_6370_Unigene_12398	E3 ubiquitin- ligase RGLG2-like	52.9465	5.47723	0.103448	-3.27302	0.0202476	Yes	0.453502	No	Down
XP_011084696	CDS_33417_Unigene_52020	CDS_24851_Unigene_40206	V-type proton ATPase subunit H-like	399.837	4194.46	10.4904	3.391	0.0203104	Yes	0.454298	No	Up
XP_011075665	CDS_35809_Unigene_55266	CDS_17255_Unigene_29035	PREDICTED: uncharacterized protein LOC105160095 isoform X2	19.1703	360.401	18.8	4.23266	0.0203681	Yes	0.45498	No	Up
XP_011072429	CDS_21413_Unigene_35129	CDS_2309_Unigene_4868	probable LRR receptor-like serine threonine- kinase At1g63430 isoform X1	419.921	21.9089	0.0521739	-4.26053	0.0204378	Yes	0.455925	No	Down
XP_011095498	CDS_3727_Unigene_8072	CDS_1555_Unigene_3443	TORNADO 1	481.083	25.1952	0.0523719	-4.25506	0.0204623	Yes	0.455862	No	Down
XP_012849263	CDS_20125_Unigene_33267	CDS_34396_Unigene_55236	DNA repair UVH3 isoform X1	114.109	1547.86	13.5648	3.7618	0.0205753	Yes	0.457767	No	Up
XP_011096345	CDS_2495_Unigene_5798	CDS_6463_Unigene_12510	MACPF domain-containing NSL1	833.451	49.295	0.0591457	-4.07958	0.0206287	Yes	0.458342	No	Down
XP_011098439	CDS_20119_Unigene_33253	CDS_19577_Unigene_32295	PREDICTED: uncharacterized protein LOC105177106	2826.25	247.571	0.0875969	-3.51298	0.0206466	Yes	0.458129	No	Down
XP_011093906	CDS_35599_Unigene_55020	CDS_19439_Unigene_32095	PREDICTED: uncharacterized protein LOC105173735	50.2079	841.302	16.7564	4.06664	0.0206578	Yes	0.457768	No	Up
XP_011074863	CDS_1526_Unigene_3352	CDS_5765_Unigene_11384	kynurenine--oxoglutarate transaminase 1-like	623.491	6317.43	10.1324	3.3409	0.0206769	Yes	0.457583	No	Up
XP_011076286	CDS_4134_Unigene_9029	CDS_9383_Unigene_17093	probable inactive leucine-rich repeat receptor kinase At1g66830	157.927	1980.56	12.541	3.64859	0.0207298	Yes	0.458145	No	Up
EYU38589	CDS_30200_Unigene_47292	CDS_6352_Unigene_12374	hypothetical protein MIMGU_mgv1a004937mg	54.7723	891.692	16.28	4.02503	0.0208971	Yes	0.46123	No	Up
XP_011080765	CDS_1742_Unigene_4095	CDS_3492_Unigene_6920	codeine O-demethylase-like	90.3742	1286.05	14.2303	3.83089	0.0209327	Yes	0.461406	No	Up
XP_011086753	CDS_34112_Unigene_52987	CDS_28882_Unigene_46021	lipoxygenase chloroplastic	646.313	6511.33	10.0746	3.33265	0.020991	Yes	0.46208	No	Up
XP_011080563	CDS_19682_Unigene_32683	CDS_17968_Unigene_30104	formin 1	1853.13	145.694	0.0786207	-3.66895	0.0210255	Yes	0.462227	No	Down
XP_012575474	CDS_29573_Unigene_46365	CDS_26461_Unigene_42512	zinc finger BED domain-containing RICESLEEPER 2-like	13.6931	217.994	15.92	3.99277	0.0210742	Yes	0.462689	No	Up
XP_011079695	CDS_12925_Unigene_23199	CDS_1179_Unigene_2612	autophagy-related 18a-like	450.045	4573.48	10.1623	3.34515	0.0211625	Yes	0.464015	No	Up
XP_011092493	CDS_14031_Unigene_24776	CDS_19497_Unigene_32197	PREDICTED: LOW QUALITY PROTEIN: uncharacterized protein LOC105172663	1347.4	96.3992	0.0715447	-3.80501	0.0211741	Yes	0.46366	No	Down
XP_011075031	CDS_16728_Unigene_28666	CDS_13787_Unigene_23984	PREDICTED: uncharacterized protein LOC105159582 isoform X1	528.552	28.4816	0.053886	-4.21395	0.0211824	Yes	0.463233	No	Down
XP_011093896	CDS_34989_Unigene_54170	CDS_31131_Unigene_49238	1-phosphatidylinositol-3-phosphate 5-kinase FAB1A isoform X1	1297.19	92.0174	0.070936	-3.81734	0.0212988	Yes	0.465169	No	Down
XP_011083055	CDS_34485_Unigene_53487	CDS_28224_Unigene_45084	PHR1-LIKE 1-like	120.499	1591.68	13.2091	3.72346	0.0213013	Yes	0.464614	No	Up
XP_011069926	CDS_12579_Unigene_22749	CDS_13515_Unigene_23585	ROOT PRIMORDIUM DEFECTIVE 1	710.214	40.5315	0.0570694	-4.13114	0.0213107	Yes	0.464212	No	Down
XP_012851054	CDS_15832_Unigene_27355	CDS_11764_Unigene_21012	1-aminocyclopropane-1-carboxylate oxidase homolog 1-like	108.632	1466.8	13.5025	3.75516	0.0214248	Yes	0.466087	No	Up
XP_012857013	CDS_11943_Unigene_21878	CDS_12977_Unigene_22784	probable receptor kinase At1g67000	104.067	1417.51	13.6211	3.76777	0.0214945	Yes	0.466993	No	Up
XP_012857287	CDS_24504_Unigene_39328	CDS_13223_Unigene_23150	zinc finger 8	138.756	1765.86	12.7263	3.66974	0.0215417	Yes	0.46741	No	Up
XP_011088836	CDS_19090_Unigene_31880	CDS_31714_Unigene_50096	PREDICTED: neuroguidin	146.059	1834.87	12.5625	3.65105	0.0216055	Yes	0.468186	No	Up
XP_011092642	CDS_23347_Unigene_37722	CDS_9667_Unigene_17552	PREDICTED: uncharacterized protein LOC105172763	229.131	2608.25	11.3833	3.50884	0.0216321	Yes	0.468153	No	Up
XP_011088058	CDS_35397_Unigene_54766	CDS_638_Unigene_1484	QWRF motif-containing 2	503.905	27.3861	0.0543478	-4.20163	0.0216333	Yes	0.467571	No	Down
XP_011080920	CDS_32902_Unigene_51215	CDS_7576_Unigene_14286	PREDICTED: uncharacterized protein LOC105164063	1064.41	71.2039	0.0668954	-3.90195	0.0216575	Yes	0.467487	No	Down
XP_011098535	CDS_34661_Unigene_53745	CDS_22392_Unigene_36515	zinc transporter 5	98.5901	1355.07	13.7444	3.78078	0.0216863	Yes	0.467504	No	Up
AKA27916	CDS_40439_Unigene_64058	CDS_3283_Unigene_6587	WRKY protein	150.624	1875.4	12.4509	3.63818	0.0217102	Yes	0.467414	No	Up
XP_011095057	CDS_32407_Unigene_50496	CDS_8878_Unigene_16341	importin subunit beta-1-like	2534.13	221.28	0.0873199	-3.51755	0.0217371	Yes	0.467389	No	Down
XP_011088276	CDS_11444_Unigene_21125	CDS_4399_Unigene_8596	B3 domain-containing At3g19184-like isoform X1	879.095	54.7723	0.0623053	-4.0045	0.0217864	Yes	0.467847	No	Down
EYU20317	CDS_29752_Unigene_46613	CDS_4140_Unigene_7965	hypothetical protein MIMGU_mgv1a007928mg	463.738	25.1952	0.0543307	-4.20209	0.0217968	Yes	0.467467	No	Down
ABH07677	CDS_14874_Unigene_26003	CDS_1164_Unigene_2571	cineole synthase	142.408	10.9545	0.0769231	-3.70044	0.0218134	Yes	0.467223	No	Down
XP_011099533	CDS_4961_Unigene_10560	CDS_15778_Unigene_26954	probable serine threonine- kinase At1g18390 isoform X3	42.9049	730.662	17.0298	4.08999	0.0218396	Yes	0.467182	No	Up
XP_011098901	CDS_585_Unigene_1295	CDS_7076_Unigene_13527	PREDICTED: uncharacterized protein LOC105177434	2755.96	246.475	0.0894336	-3.48304	0.0218534	Yes	0.466878	No	Down
XP_011087182	CDS_18391_Unigene_30921	CDS_12098_Unigene_21487	microtubule-associated TORTIFOLIA1	74.8554	1096.54	14.6488	3.87271	0.0218958	Yes	0.467185	No	Up
XP_011077237	CDS_34644_Unigene_53725	CDS_15885_Unigene_27114	transcriptional activator DEMETER	94.0257	8.76356	0.0932039	-3.42347	0.0220483	Yes	0.469838	No	Down
XP_011087575	CDS_23265_Unigene_37603	CDS_8678_Unigene_16006	flap endonuclease 1	45.6435	761.334	16.68	4.06005	0.022126	Yes	0.470891	No	Up
XP_011069931	CDS_37465_Unigene_57476	CDS_31284_Unigene_49458	PREDICTED: uncharacterized protein LOC105155708	401.663	4061.91	10.1127	3.3381	0.0222991	Yes	0.473969	No	Up
XP_011099941	CDS_13413_Unigene_23890	CDS_13407_Unigene_23414	DNA repair complementing XP-C cells homolog isoform X1	114.109	1497.47	13.1232	3.71405	0.0223507	Yes	0.474462	No	Up
XP_011077518	CDS_21700_Unigene_35520	CDS_7660_Unigene_14467	probably inactive leucine-rich repeat receptor kinase IMK2	95.8514	1309.06	13.6571	3.77158	0.0223809	Yes	0.474498	No	Up
XP_011097983	CDS_14531_Unigene_25552	CDS_55_Unigene_97	PREDICTED: uncharacterized protein LOC105176777	396.186	21.9089	0.0552995	-4.17659	0.022413	Yes	0.474575	No	Down
XP_011091460	CDS_3221_Unigene_7163	CDS_5588_Unigene_11017	heat shock cognate 70 kDa 2-like	642.661	6280.19	9.77216	3.28868	0.0224455	Yes	0.474659	No	Up
XP_011095492	CDS_135_Unigene_357	CDS_32866_Unigene_51959	MO25 At5g47540	43.8178	732.853	16.725	4.06393	0.022484	Yes	0.47487	No	Up
XP_011100078	CDS_17514_Unigene_29731	CDS_17201_Unigene_28950	general transcription factor 3C polypeptide 3 isoform X1	107.719	1427.36	13.2508	3.72801	0.0225561	Yes	0.475792	No	Up
XP_011079096	CDS_22122_Unigene_36141	CDS_10166_Unigene_18342	phosphatidylinositol 4-kinase gamma 8	510.295	28.4816	0.055814	-4.16323	0.0225636	Yes	0.475347	No	Down
XP_011082239	CDS_12314_Unigene_22357	CDS_372_Unigene_800	ankyrin repeat-containing At5g02620-like	720.255	42.7224	0.0593156	-4.07544	0.0225806	Yes	0.475106	No	Down
XP_012855653	CDS_12595_Unigene_22774	CDS_1530_Unigene_3410	late blight resistance homolog R1A-10	458.261	4520.9	9.86534	3.30237	0.0226833	Yes	0.476664	No	Up
XP_011075667	CDS_6778_Unigene_13615	CDS_29250_Unigene_46547	PREDICTED: uncharacterized protein LOC105160099 isoform X2	60.2495	923.46	15.3273	3.93803	0.0226836	Yes	0.47607	No	Up
XP_011069575	CDS_13408_Unigene_23879	CDS_12042_Unigene_21405	polyadenylate-binding -interacting 7-like	764.073	7479.7	9.78925	3.2912	0.0227487	Yes	0.476836	No	Up
XP_011072435	CDS_9318_Unigene_17962	CDS_829_Unigene_1890	clavaminate synthase At3g21360	867.227	8578.43	9.89179	3.30623	0.0227555	Yes	0.476379	No	Up
XP_011086928	CDS_18324_Unigene_30837	CDS_13059_Unigene_22899	PREDICTED: uncharacterized protein LOC105168518 isoform X1	106.806	1412.03	13.2205	3.72471	0.022794	Yes	0.476587	No	Up
XP_011101156	CDS_11215_Unigene_20770	CDS_19714_Unigene_32488	MADS-box SOC1-like isoform X1	731.21	43.8178	0.0599251	-4.0607	0.0227945	Yes	0.476	No	Down
AJD25202	CDS_11584_Unigene_21308	CDS_34255_Unigene_55067	cytochrome P450 CYP82U4	1121.92	11479.2	10.2317	3.35498	0.022855	Yes	0.476665	No	Up
XP_012851960	CDS_22417_Unigene_36542	CDS_18247_Unigene_30445	probable plastid-lipid-associated chloroplastic isoform X1	1828.48	20620.7	11.2775	3.49537	0.0228682	Yes	0.476345	No	Up
XP_011095151	CDS_18739_Unigene_31376	CDS_10213_Unigene_18433	PREDICTED: uncharacterized protein LOC105174676	1315.45	97.4946	0.0741152	-3.75409	0.022932	Yes	0.477076	No	Down
XP_011091024	CDS_26741_Unigene_42429	CDS_25977_Unigene_41816	WD repeat-containing 43	56.598	877.452	15.5032	3.9545	0.023002	Yes	0.477936	No	Up
XP_011092557	CDS_13821_Unigene_24471	CDS_4351_Unigene_8489	O-acyltransferase WSD1-like isoform X2	193.529	2227.04	11.5075	3.52451	0.0230433	Yes	0.478198	No	Up
XP_011075903	CDS_7791_Unigene_15431	CDS_1248_Unigene_2842	IQ-DOMAIN 14	589.715	33.9588	0.0575851	-4.11816	0.0231348	Yes	0.479501	No	Down
XP_011091762	CDS_38980_Unigene_60211	CDS_419_Unigene_886	receptor 12	22.8218	400.933	17.568	4.13488	0.0231467	Yes	0.479151	No	Up
XP_012838847	CDS_26382_Unigene_41905	CDS_7027_Unigene_13456	ECERIFERUM 1	606.146	35.0542	0.0578313	-4.11201	0.0231483	Yes	0.478589	No	Down
XP_012840877	CDS_7461_Unigene_14839	CDS_6259_Unigene_12223	probable inactive receptor kinase RLK902	118.673	1520.48	12.8123	3.67946	0.0231928	Yes	0.478915	No	Up
XP_011080876	CDS_39398_Unigene_61545	CDS_11369_Unigene_20391	cation H(+) antiporter 18-like	9.12871	92.0174	10.08	3.33342	0.0233793	Yes	0.482169	No	Up
XP_011092763	CDS_16434_Unigene_28263	CDS_11807_Unigene_21079	non-symbiotic hemoglobin 1	586.063	33.9588	0.0579439	-4.1092	0.0234067	Yes	0.482137	No	Down
XP_012836659	CDS_38311_Unigene_58640	CDS_30718_Unigene_48689	probable disease resistance RF9	26758.1	2291.67	0.0856441	-3.5455	0.0235102	Yes	0.483671	No	Down
XP_011072576	CDS_10422_Unigene_19639	CDS_3439_Unigene_6846	ELF4-LIKE 4	2762.35	256.334	0.0927958	-3.4298	0.0235675	Yes	0.484252	No	Down
XP_011073028	CDS_18677_Unigene_31291	CDS_27650_Unigene_44251	nuclear transcription factor Y subunit C-1	4402.78	452.419	0.102758	-3.28268	0.0235914	Yes	0.484147	No	Down
XP_011090995	CDS_24208_Unigene_38918	CDS_15256_Unigene_26215	fasciclin-like arabinogalactan 8	1266.15	13031.4	10.2921	3.36347	0.0236178	Yes	0.484092	No	Up
XP_011094068	CDS_26553_Unigene_42156	CDS_20844_Unigene_34250	isoamylase chloroplastic isoform X2	4092.4	416.269	0.101718	-3.29736	0.0236757	Yes	0.484682	No	Down
XP_011085623	CDS_35156_Unigene_54409	CDS_5134_Unigene_9936	PREDICTED: uncharacterized protein LOC105167549	2227.41	196.085	0.0880328	-3.50582	0.0237048	Yes	0.484683	No	Down
XP_012858974	CDS_14623_Unigene_25681	CDS_6314_Unigene_12311	PREDICTED: uncharacterized protein LOC105978104	870.879	56.9631	0.0654088	-3.93437	0.0238459	Yes	0.48697	No	Down
XP_011095565	CDS_16121_Unigene_27808	CDS_22777_Unigene_37103	WEB family At5g55860-like	3243.43	315.488	0.0972699	-3.36186	0.0239316	Yes	0.488122	No	Down
XP_011094477	CDS_39186_Unigene_60793	CDS_1618_Unigene_3539	PREDICTED: uncharacterized protein LOC105174167	83.0713	1141.45	13.7407	3.78038	0.0239708	Yes	0.488325	No	Up
XP_011080175	CDS_20054_Unigene_33194	CDS_13943_Unigene_24199	SULFUR DEFICIENCY-INDUCED 1	324.069	3308.24	10.2085	3.35169	0.0240173	Yes	0.488675	No	Up
XP_011100758	CDS_27910_Unigene_44121	CDS_15943_Unigene_27199	probable serine threonine- kinase DDB_G0282963 isoform X2	300.335	3111.06	10.3587	3.37277	0.0240275	Yes	0.488287	No	Up
XP_011090236	CDS_34208_Unigene_53092	CDS_23588_Unigene_38309	PREDICTED: uncharacterized protein LOC105170964	3498.12	347.256	0.0992693	-3.33251	0.0240671	Yes	0.488495	No	Down
XP_011083332	CDS_33977_Unigene_52807	CDS_1833_Unigene_3940	homeobox knotted-1-like 1	356.02	20.8135	0.0584615	-4.09637	0.0242026	Yes	0.490648	No	Down
XP_011087785	CDS_29690_Unigene_46521	CDS_23114_Unigene_37604	neurofilament heavy polypeptide	1283.5	97.4946	0.0759602	-3.71861	0.0243348	Yes	0.492729	No	Down
XP_011093072	CDS_13652_Unigene_24220	CDS_28029_Unigene_44806	UDP-D-xylose:L-fucose alpha-1,3-D-xylosyltransferase MGP4	15.5188	234.425	15.1059	3.91704	0.0243481	Yes	0.492399	No	Up
XP_012858840	CDS_39982_Unigene_62887	CDS_33994_Unigene_54440	PREDICTED: uncharacterized protein LOC105977981	4376.3	63037.4	14.4043	3.84842	0.024398	Yes	0.492811	No	Up
XP_011096697	CDS_1349_Unigene_2925	CDS_643_Unigene_1498	serine threonine- kinase CCR4	141.495	1703.42	12.0387	3.58961	0.0245041	Yes	0.494353	No	Up
XP_012836195	CDS_24482_Unigene_39300	CDS_14912_Unigene_25684	PREDICTED: uncharacterized protein LOC105956833 isoform X2	179.836	13.1453	0.0730964	-3.77405	0.0245097	Yes	0.49387	No	Down
XP_012852457	CDS_22493_Unigene_36633	CDS_17068_Unigene_28804	eukaryotic translation initiation factor 6-2	572.37	5361.11	9.36651	3.22751	0.0246644	Yes	0.496387	No	Up
XP_012844854	CDS_2742_Unigene_6312	CDS_4521_Unigene_8836	G-type lectin S-receptor-like serine threonine- kinase At4g27290	104.98	1348.49	12.8452	3.68316	0.0246893	Yes	0.496288	No	Up
XP_011070336	CDS_15774_Unigene_27275	CDS_14279_Unigene_24727	dolichyl-diphosphooligosaccharide-- glycosyltransferase subunit DAD1	2180.85	194.989	0.0894098	-3.48342	0.0247394	Yes	0.496695	No	Down
XP_011096160	CDS_21979_Unigene_35953	CDS_21446_Unigene_35153	cysteine-rich receptor kinase 25	1240.59	94.2083	0.0759382	-3.71903	0.0247806	Yes	0.496923	No	Down
XP_011097508	CDS_4891_Unigene_10423	CDS_2277_Unigene_4823	probable glucan 1,3-beta-glucosidase A	204.483	14.2408	0.0696429	-3.84388	0.0248455	Yes	0.497627	No	Down
XP_011072268	CDS_3939_Unigene_8587	CDS_2107_Unigene_4495	PREDICTED: uncharacterized protein LOC105157559	79.4198	1087.78	13.6966	3.77574	0.0248545	Yes	0.49721	No	Up
XP_012844295	CDS_24315_Unigene_39067	CDS_25325_Unigene_40890	cinnamoyl- reductase 1-like	292.119	3002.62	10.2788	3.36159	0.024871	Yes	0.496942	No	Up
XP_011093871	CDS_1677_Unigene_3875	CDS_12819_Unigene_22541	ethylene-responsive transcription factor ERF017-like	36.5148	601.399	16.47	4.04177	0.024889	Yes	0.496706	No	Up
XP_011074159	CDS_1711_Unigene_3973	CDS_11343_Unigene_20326	probable beta-D-xylosidase 7	39.2534	639.74	16.2977	4.02659	0.0248951	Yes	0.496235	No	Up
XP_012834360	CDS_13044_Unigene_23357	CDS_12718_Unigene_22398	chaperone dnaJ 6-like	2356.12	215.803	0.0915924	-3.44863	0.0249134	Yes	0.496005	No	Down
XP_012843430	CDS_65_Unigene_134	CDS_6803_Unigene_13090	phospholipase D alpha 1-like	580.586	35.0542	0.0603774	-4.04985	0.0251064	Yes	0.499252	No	Down
XP_011094501	CDS_16560_Unigene_28415	CDS_11536_Unigene_20658	serine threonine phosphatase 2A 57 kDa regulatory subunit B beta isoform	789.633	51.4859	0.0652023	-3.93893	0.0251952	Yes	0.50042	No	Down
XP_012839033	CDS_2964_Unigene_6698	CDS_10177_Unigene_18367	PREDICTED: uncharacterized protein LOC105959470	513.033	30.6725	0.0597865	-4.06404	0.0252445	Yes	0.500802	No	Down
XP_009763373	CDS_329_Unigene_707	CDS_34353_Unigene_55181	aspartic ase PCS1-like	12.7802	159.935	12.5143	3.6455	0.0252695	Yes	0.500703	No	Up
AJD25174	CDS_11069_Unigene_20568	CDS_12823_Unigene_22547	cytochrome P450 CYP74A1	918.348	63.5358	0.0691849	-3.8534	0.0253872	Yes	0.502438	No	Down
CDP14565	CDS_13365_Unigene_23827	CDS_4409_Unigene_8618	unnamed protein product	493.863	29.577	0.0598891	-4.06156	0.0254334	Yes	0.502755	No	Down
XP_011081730	CDS_10269_Unigene_19404	CDS_5355_Unigene_10491	ATP-dependent 6-phosphofructokinase 6-like	1248.81	96.3992	0.077193	-3.69539	0.0254469	Yes	0.502426	No	Down
XP_011081988	CDS_24460_Unigene_39280	CDS_19278_Unigene_31871	probable folate-biopterin transporter 2	38.3406	620.022	16.1714	4.01538	0.0254623	Yes	0.502134	No	Up
XP_011079284	CDS_31603_Unigene_49275	CDS_22079_Unigene_36078	adagio 1-like	2041.18	181.844	0.0890877	-3.48863	0.0254683	Yes	0.50166	No	Down
XP_011092018	CDS_14759_Unigene_25860	CDS_19838_Unigene_32692	PREDICTED: uncharacterized protein LOC105172335 isoform X1	20.996	342.874	16.3304	4.02949	0.0254701	Yes	0.501103	No	Up
XP_011085155	CDS_6750_Unigene_13563	CDS_10079_Unigene_18192	14 kDa zinc-binding	2761.43	266.193	0.0963967	-3.37487	0.0255045	Yes	0.501188	No	Down
XP_011091178	CDS_4767_Unigene_10186	CDS_11569_Unigene_20715	SWI SNF-related matrix-associated actin-dependent regulator of chromatin subfamily A member 3-like 3	1192.21	90.9219	0.0762634	-3.71287	0.0255509	Yes	0.501508	No	Down
XP_011096089	CDS_20363_Unigene_33586	CDS_153_Unigene_362	abnormal spindle-like microcephaly-associated homolog isoform X2	621.665	38.3406	0.061674	-4.01919	0.0255773	Yes	0.501435	No	Down
XP_011094061	CDS_28765_Unigene_45253	CDS_25974_Unigene_41809	SART-1 family DOT2	6347.19	687.94	0.108385	-3.20576	0.0255907	Yes	0.501108	No	Down
XP_011071163	CDS_9434_Unigene_18147	CDS_19485_Unigene_32171	PREDICTED: uncharacterized protein LOC105156659	2701.19	259.62	0.0961136	-3.37912	0.0256328	Yes	0.501344	No	Down
XP_011093487	CDS_2944_Unigene_6668	CDS_7525_Unigene_14164	uncharacterized RING finger -like	287.554	2925.93	10.1752	3.34699	0.0257393	Yes	0.502837	No	Up
XP_012850264	CDS_30744_Unigene_48067	CDS_28542_Unigene_45527	ERBB-3 BINDING PROTEIN 1	7330.35	792.007	0.108045	-3.2103	0.0257617	Yes	0.502685	No	Down
XP_011077159	CDS_18118_Unigene_30556	CDS_30292_Unigene_48072	aspartic ase 2 isoform X2	14.6059	200.466	13.725	3.77873	0.0258123	Yes	0.503083	No	Up
XP_011088521	CDS_601_Unigene_1340	CDS_33985_Unigene_54430	auxin-induced 15A-like	569.631	35.0542	0.0615385	-4.02237	0.0260105	Yes	0.506353	No	Down
XP_011075010	CDS_38723_Unigene_59675	CDS_2747_Unigene_5523	ABC transporter F family member 4	220.002	15.3362	0.0697095	-3.8425	0.026205	Yes	0.509545	No	Down
XP_011096688	CDS_16127_Unigene_27818	CDS_4436_Unigene_8677	PREDICTED: uncharacterized protein LOC105175794	1038.85	76.6812	0.0738137	-3.75997	0.0262426	Yes	0.509681	No	Down
XP_011091726	CDS_26486_Unigene_42057	CDS_8759_Unigene_16143	probable LRR receptor-like serine threonine- kinase At3g47570	1005.98	73.3948	0.0729583	-3.77678	0.026248	Yes	0.509193	No	Down
XP_012847156	CDS_33208_Unigene_51682	CDS_28912_Unigene_46059	myb-related 3R-1	597.93	37.2451	0.0622901	-4.00485	0.0262654	Yes	0.508938	No	Down
XP_011090480	CDS_30353_Unigene_47515	CDS_3074_Unigene_6121	phragmoplast orienting kinesin 2	467.39	28.4816	0.0609375	-4.03653	0.0262929	Yes	0.508878	No	Down
XP_011094820	CDS_4276_Unigene_9312	CDS_2336_Unigene_4921	PREDICTED: uncharacterized protein LOC105174416 isoform X1	395.273	24.0998	0.06097	-4.03576	0.0262956	Yes	0.508342	No	Down
XP_011077572	CDS_24083_Unigene_38747	CDS_17352_Unigene_29167	auxin transporter 2	479.257	4432.17	9.248	3.20914	0.0263152	Yes	0.508129	No	Up
XP_011082417	CDS_23178_Unigene_37494	CDS_19041_Unigene_31552	histone-lysine N-methyltransferase EZ2 isoform X2	34.6891	4.38178	0.126316	-2.98489	0.0263702	Yes	0.508604	No	Down
XP_011100166	CDS_1040_Unigene_2342	CDS_2556_Unigene_5259	PREDICTED: uncharacterized protein LOC105178397	794.198	7269.37	9.1531	3.19426	0.0263759	Yes	0.508125	No	Up
XP_011084673	CDS_19597_Unigene_32577	CDS_20125_Unigene_33171	dehydrogenase reductase SDR family member 7 isoform X1	1439.6	118.308	0.0821814	-3.60505	0.0264618	Yes	0.509192	No	Down
XP_011080567	CDS_32428_Unigene_50535	CDS_20368_Unigene_33546	PREDICTED: uncharacterized protein LOC105163796	32.8634	529.1	16.1	4.00899	0.0264622	Yes	0.508612	No	Up
AKN09586	CDS_33023_Unigene_51393	CDS_29706_Unigene_47217	basic helix-loop-helix transcription factor	266.558	17.5271	0.0657534	-3.92679	0.0265659	Yes	0.510016	No	Down
XP_011092401	CDS_38286_Unigene_58608	CDS_2511_Unigene_5200	PREDICTED: uncharacterized protein LOC105172591 isoform X1	159.752	1811.87	11.3417	3.50357	0.026579	Yes	0.50968	No	Up
XP_011074517	CDS_32520_Unigene_50661	CDS_24063_Unigene_39008	probable phosphatase 2C 55	194.442	2109.83	10.8507	3.43972	0.0266945	Yes	0.511308	No	Up
XP_011084412	CDS_24839_Unigene_39795	CDS_19323_Unigene_31932	PREDICTED: remorin-like	8115.42	885.12	0.109066	-3.19672	0.0267222	Yes	0.51125	No	Down
CDP00186	CDS_32389_Unigene_50469	CDS_19231_Unigene_31811	unnamed protein product	5.47723	42.7224	7.8	2.96347	0.0267233	Yes	0.510684	No	Up
XP_011091541	CDS_25792_Unigene_41059	CDS_1278_Unigene_2943	PREDICTED: uncharacterized protein LOC105171956	559.59	35.0542	0.0626427	-3.99671	0.0268765	Yes	0.513025	No	Down
XP_012845924	CDS_21_Unigene_63	CDS_4271_Unigene_8289	PREDICTED: uncharacterized protein LOC105965921	662.744	42.7224	0.0644628	-3.95539	0.0269333	Yes	0.51352	No	Down
XP_011074456	CDS_21546_Unigene_35349	CDS_21555_Unigene_35309	PREDICTED: uncharacterized protein LOC105159183	80.3326	1057.1	13.1591	3.71799	0.0271933	Yes	0.517884	No	Up
XP_011075762	CDS_7381_Unigene_14702	CDS_7591_Unigene_14321	RNA polymerase sigma factor sigA	1844	18876.7	10.2368	3.3557	0.0272076	Yes	0.517566	No	Up
XP_011072388	CDS_10810_Unigene_20194	CDS_2926_Unigene_5843	transcription factor bHLH68-like isoform X1	30.1247	479.805	15.9273	3.99343	0.0272265	Yes	0.517335	No	Up
NP_001291340	CDS_26076_Unigene_41476	CDS_5287_Unigene_10323	probable tocopherol chloroplastic	1108.23	85.4447	0.0771005	-3.69712	0.0272317	Yes	0.516843	No	Down
EYU25216	CDS_22418_Unigene_36543	CDS_18243_Unigene_30443	hypothetical protein MIMGU_mgv11b005497mg	523.988	4726.85	9.02091	3.17327	0.0273321	Yes	0.518159	No	Up
XP_011085998	CDS_19551_Unigene_32522	CDS_21964_Unigene_35925	PREDICTED: uncharacterized protein LOC105167859 isoform X1	146.059	1670.55	11.4375	3.5157	0.0273409	Yes	0.517738	No	Up
XP_012837460	CDS_19538_Unigene_32494	CDS_19516_Unigene_32226	PREDICTED: uncharacterized protein C1F8.04c-like isoform X1	569.631	36.1497	0.0634615	-3.97797	0.0273641	Yes	0.517589	No	Down
XP_011076434	CDS_36499_Unigene_56168	CDS_28423_Unigene_45350	ATP-dependent 6-phosphofructokinase chloroplastic	117.76	1412.03	11.9907	3.58384	0.0273904	Yes	0.517499	No	Up
AJD25204	CDS_4153_Unigene_9068	CDS_24705_Unigene_39976	cytochrome P450 CYP84A60	39.2534	609.067	15.5163	3.95571	0.0274066	Yes	0.517217	No	Up
XP_011092677	CDS_13724_Unigene_24329	CDS_8251_Unigene_15354	PREDICTED: uncharacterized protein LOC105172797	1210.47	96.3992	0.079638	-3.6504	0.0274137	Yes	0.516767	No	Down
XP_011080512	CDS_1559_Unigene_3451	CDS_621_Unigene_1448	PREDICTED: uncharacterized protein LOC105163758	147.885	1680.41	11.363	3.50627	0.0275974	Yes	0.519642	No	Up
KGN66469	CDS_10658_Unigene_19959	CDS_10888_Unigene_19525	hypothetical protein Csa_1G612925	7931.02	879.642	0.110912	-3.17252	0.0276381	Yes	0.519822	No	Down
XP_011087135	CDS_183_Unigene_430	CDS_1948_Unigene_4242	PREDICTED: uncharacterized protein LOC105168700	2704.84	29786.2	11.0122	3.46103	0.0277008	Yes	0.520413	No	Up
XP_011081722	CDS_38247_Unigene_58562	CDS_2261_Unigene_4781	zinc finger CCCH domain-containing 23	3763.77	405.315	0.107689	-3.21506	0.0277121	Yes	0.520038	No	Down
XP_011099960	CDS_38671_Unigene_59610	CDS_6193_Unigene_12125	PREDICTED: kinesin-4	1452.38	122.69	0.0844752	-3.56533	0.0277308	Yes	0.519804	No	Down
XP_011071374	CDS_892_Unigene_2133	CDS_19390_Unigene_32020	probable prefoldin subunit 3	2367.99	230.043	0.0971473	-3.36368	0.0279847	Yes	0.523975	No	Down
XP_011071878	CDS_21906_Unigene_35857	CDS_10075_Unigene_18187	phosphoenolpyruvate phosphate translocator chloroplastic-like	146.059	1654.12	11.325	3.50144	0.028014	Yes	0.523934	No	Up
XP_011076167	CDS_38466_Unigene_58881	CDS_33706_Unigene_53707	UPF0329 ECU05_1680 ECU11_0050	690.13	46.0087	0.0666667	-3.90689	0.0280145	Yes	0.523356	No	Down
XP_011070768	CDS_25390_Unigene_40562	CDS_17270_Unigene_29064	PREDICTED: uncharacterized protein LOC105156355 isoform X2	41.0792	625.499	15.2267	3.92853	0.0280782	Yes	0.523958	No	Up
XP_011084651	CDS_27072_Unigene_42859	CDS_27204_Unigene_43567	zinc finger CCCH domain-containing ZFN-like	1698.85	151.171	0.0889844	-3.4903	0.0281026	Yes	0.523827	No	Down
XP_011084003	CDS_16104_Unigene_27779	CDS_15275_Unigene_26247	NADP-dependent glyceraldehyde-3-phosphate dehydrogenase	306.725	2975.23	9.7	3.27798	0.0281922	Yes	0.52491	No	Up
BAG80544	CDS_30924_Unigene_48336	CDS_31993_Unigene_50471	UDP-glucose:glucosyltransferase	478.344	4302.91	8.99542	3.16919	0.0282123	Yes	0.524699	No	Up
XP_011087709	CDS_19757_Unigene_32807	CDS_17280_Unigene_29075	ubiquitin-like domain-containing CTD phosphatase	2627.24	262.907	0.100069	-3.32093	0.0282243	Yes	0.524337	No	Down
XP_011075204	CDS_12802_Unigene_23035	CDS_24621_Unigene_39853	DNA-directed RNA polymerase I subunit rpa1	484.734	4352.2	8.97853	3.16648	0.0282281	Yes	0.523823	No	Up
XP_009628602	CDS_970_Unigene_2247	CDS_33231_Unigene_52786	phosphate chloroplastic	1905.16	19191.1	10.0732	3.33245	0.0283115	Yes	0.524786	No	Up
CDP19959	CDS_10052_Unigene_19050	CDS_27866_Unigene_44560	unnamed protein product	3471.65	371.356	0.106968	-3.22475	0.0283126	Yes	0.524223	No	Down
XP_012851957	CDS_2783_Unigene_6364	CDS_579_Unigene_1327	pentatricopeptide repeat-containing chloroplastic	43.8178	657.267	15	3.90689	0.028328	Yes	0.523926	No	Up
XP_011083552	CDS_18650_Unigene_31255	CDS_6506_Unigene_12581	alkaline neutral invertase CINV2-like	1862.26	170.889	0.0917647	-3.44592	0.0283736	Yes	0.524188	No	Down
XP_012849537	CDS_27848_Unigene_44026	CDS_28632_Unigene_45652	probable receptor kinase At1g67000	2156.2	205.944	0.0955123	-3.38817	0.0283915	Yes	0.523938	No	Down
XP_011074257	CDS_27322_Unigene_43255	CDS_13146_Unigene_23046	PREDICTED: uncharacterized protein LOC105159024	104.98	1270.72	12.1043	3.59745	0.0284555	Yes	0.524538	No	Up
XP_009786212	CDS_4052_Unigene_8849	CDS_26904_Unigene_43130	3-ketoacyl- synthase 6	108.632	1304.68	12.0101	3.58617	0.0284763	Yes	0.524342	No	Up
XP_011069652	CDS_39847_Unigene_62678	CDS_2426_Unigene_5076	PREDICTED: protein YLS3	457.348	4118.87	9.00599	3.17088	0.0285545	Yes	0.525201	No	Up
BAF96581	CDS_28797_Unigene_45295	CDS_10614_Unigene_19140	lignan glucosyltransferase	508.469	32.8634	0.064632	-3.95161	0.0287191	Yes	0.527647	No	Down
XP_012844998	CDS_40335_Unigene_63869	CDS_34183_Unigene_54748	PREDICTED: protein NEN4	153.362	13.1453	0.0857143	-3.54432	0.0287245	Yes	0.527164	No	Down
XP_011099549	CDS_15830_Unigene_27353	CDS_8460_Unigene_15664	elongator complex 5	2018.36	190.607	0.0944369	-3.40451	0.0287462	Yes	0.526981	No	Down
XP_012837712	CDS_15680_Unigene_27127	CDS_32320_Unigene_50904	ATP-dependent Clp protease proteolytic subunit-related chloroplastic	785.982	6902.4	8.78188	3.13453	0.0287729	Yes	0.526892	No	Up
XP_011092342	CDS_31348_Unigene_48902	CDS_15139_Unigene_26031	PREDICTED: uncharacterized protein LOC105172555	1393.95	13121.2	9.41297	3.23465	0.0287911	Yes	0.526646	No	Up
XP_011083497	CDS_18596_Unigene_31194	CDS_16042_Unigene_27348	valine--tRNA mitochondrial isoform X2	2097.78	200.466	0.0955614	-3.38743	0.028832	Yes	0.526816	No	Down
XP_011096896	CDS_11333_Unigene_20972	CDS_10390_Unigene_18754	pentatricopeptide repeat-containing At2g35130	1155.69	10502	9.0872	3.18384	0.0289251	Yes	0.527939	No	Up
XP_011077784	CDS_13888_Unigene_24575	CDS_8559_Unigene_15816	ABC transporter G family member 22	785.982	6878.3	8.75122	3.12948	0.0289886	Yes	0.528519	No	Up
XP_011079144	CDS_35552_Unigene_54965	CDS_28054_Unigene_44847	regulation of nuclear pre-mRNA domain-containing 1B-like isoform X1	240.085	2414.36	10.0563	3.33002	0.0289935	Yes	0.528031	No	Up
XP_011097449	CDS_3520_Unigene_7706	CDS_5103_Unigene_9892	glutathione S-transferase chloroplastic	503.905	4455.18	8.8413	3.14426	0.0289942	Yes	0.527466	No	Up
XP_011101120	CDS_33783_Unigene_52545	CDS_26566_Unigene_42663	beta- soluble isoenzyme I-like	624.404	41.6269	0.0666667	-3.90689	0.029056	Yes	0.528015	No	Down
XP_011076899	CDS_20143_Unigene_33298	CDS_2762_Unigene_5545	40S ribosomal SA-like	6518.81	747.094	0.114606	-3.12525	0.0290568	Yes	0.527454	No	Down
XP_011075162	CDS_14130_Unigene_24943	CDS_1954_Unigene_4252	PREDICTED: uncharacterized protein LOC105159695 isoform X2	1230.55	101.876	0.0827893	-3.59441	0.0291638	Yes	0.52882	No	Down
XP_011089027	CDS_667_Unigene_1565	CDS_3257_Unigene_6535	serine threonine- kinase OXI1	231.869	2340.97	10.0961	3.33572	0.0292107	Yes	0.529094	No	Up
XP_011095500	CDS_6314_Unigene_12785	CDS_693_Unigene_1583	probable serine threonine- kinase WNK11	940.257	71.2039	0.0757282	-3.72303	0.0292587	Yes	0.529388	No	Down
XP_011089292	CDS_33932_Unigene_52751	CDS_28891_Unigene_46028	serine threonine- phosphatase 6 regulatory subunit 3-like isoform X1	266.558	2613.73	9.80548	3.29359	0.0293608	Yes	0.53066	No	Up
AKA27870	CDS_26205_Unigene_41663	CDS_24292_Unigene_39353	WRKY protein	760.421	53.6768	0.0705882	-3.82443	0.0294159	Yes	0.531079	No	Down
XP_012829818	CDS_9159_Unigene_17713	CDS_17982_Unigene_30119	PREDICTED: uncharacterized protein LOC105950974	735.774	6361.25	8.64566	3.11198	0.0295964	Yes	0.533759	No	Up
XP_011088213	CDS_32101_Unigene_50052	CDS_28578_Unigene_45571	probable receptor-like serine threonine- kinase At5g57670	156.101	1703.42	10.9123	3.44788	0.029607	Yes	0.533375	No	Up
XP_011074010	CDS_23436_Unigene_37871	CDS_19422_Unigene_32078	la-related 6B-like	183.487	1931.27	10.5254	3.3958	0.0297042	Yes	0.534548	No	Up
XP_011090457	CDS_38210_Unigene_58518	CDS_31729_Unigene_50134	PREDICTED: LOW QUALITY PROTEIN: uncharacterized protein LOC105171130	575.109	4965.65	8.63429	3.11008	0.0298243	Yes	0.536129	No	Up
XP_011075280	CDS_36661_Unigene_56411	CDS_22346_Unigene_36437	ENHANCER OF AG-4 2-like isoform X1	765.899	54.7723	0.0715137	-3.80564	0.0299531	Yes	0.537865	No	Down
XP_011073656	CDS_3290_Unigene_7292	CDS_3313_Unigene_6639	LRR receptor-like serine threonine- kinase HSL2	1225.99	102.972	0.0839911	-3.57362	0.0299998	Yes	0.538123	No	Down
XP_011083071	CDS_36587_Unigene_56302	CDS_30210_Unigene_47976	ABC transporter C family member 5-like	1434.12	125.976	0.0878421	-3.50894	0.0300357	Yes	0.538188	No	Down
XP_011095279	CDS_24049_Unigene_38709	CDS_23935_Unigene_38796	G-type lectin S-receptor-like serine threonine- kinase At4g27290 isoform X2	270.21	2615.92	9.68108	3.27517	0.0301219	Yes	0.539152	No	Up
XP_011100459	CDS_15095_Unigene_26263	CDS_10304_Unigene_18572	anthocyanidin 3-O-glucosyltransferase 2-like	1173.95	10462.6	8.91229	3.1558	0.0301606	Yes	0.539266	No	Up
XP_011077092	CDS_20577_Unigene_33887	CDS_4545_Unigene_8881	endoglucanase 12	39.2534	578.395	14.7349	3.88116	0.0301887	Yes	0.539191	No	Up
XP_012840952	CDS_6326_Unigene_12811	CDS_11255_Unigene_20174	UDP-glycosyltransferase 86A1-like	4138.04	472.137	0.114097	-3.13167	0.0302594	Yes	0.539874	No	Down
AIU99495	CDS_28651_Unigene_45100	CDS_27792_Unigene_44450	Enoyl-ACP Reductase	3513.64	389.978	0.11099	-3.1715	0.0304427	Yes	0.542564	No	Down
XP_011096759	CDS_32548_Unigene_50702	CDS_4263_Unigene_8274	ROOT HAIR DEFECTIVE 3 homolog 2 isoform X1	985.901	77.7766	0.0788889	-3.66403	0.0305011	Yes	0.543024	No	Down
AIE89791	CDS_30212_Unigene_47305	CDS_16193_Unigene_27563	SQUAMOSA promoter binding -like partial	2210.06	221.28	0.100124	-3.32014	0.0307822	Yes	0.547443	No	Down
XP_012842090	CDS_38021_Unigene_58243	CDS_18794_Unigene_31196	probable leucine-rich repeat receptor kinase At1g35710	39.2534	571.822	14.5674	3.86468	0.0308304	Yes	0.547716	No	Up
XP_011082970	CDS_721_Unigene_1749	CDS_4017_Unigene_7756	F-box At3g07870-like	10.9545	99.6855	9.1	3.18587	0.03087	Yes	0.547836	No	Up
XP_011074901	CDS_18876_Unigene_31552	CDS_16037_Unigene_27345	grpE mitochondrial	1659.6	154.458	0.0930693	-3.42555	0.0310028	Yes	0.549608	No	Down
KOM36739	CDS_7230_Unigene_14418	CDS_13057_Unigene_22894	hypothetical protein LR48_Vigan03g012000	1732.63	163.221	0.0942044	-3.40806	0.0310157	Yes	0.549252	No	Down
XP_011089282	CDS_25898_Unigene_41217	CDS_25291_Unigene_40837	-tyrosine sulfotransferase-like isoform X1	59.3366	798.579	13.4585	3.75044	0.031033	Yes	0.548975	No	Up
XP_008240549	CDS_30125_Unigene_47172	CDS_28199_Unigene_45056	NADH--cytochrome b5 reductase 1	1866.82	179.653	0.0962347	-3.3773	0.0310729	Yes	0.549097	No	Down
XP_011087639	CDS_7959_Unigene_15757	CDS_6585_Unigene_12698	PREDICTED: uncharacterized protein At5g08430	530.378	36.1497	0.0681583	-3.87497	0.0311488	Yes	0.549855	No	Down
XP_011093778	CDS_14344_Unigene_25245	CDS_1754_Unigene_3736	PREDICTED: uncharacterized protein LOC105173649	178.923	1856.78	10.3776	3.37539	0.0311661	Yes	0.549579	No	Up
XP_011093904	CDS_35616_Unigene_55035	CDS_19437_Unigene_32094	alpha-aminoadipic semialdehyde synthase	145.146	1575.25	10.8528	3.44	0.0311774	Yes	0.549197	No	Up
XP_011095273	CDS_18617_Unigene_31225	CDS_14939_Unigene_25721	glycerophosphodiester phosphodiesterase GDPD4 isoform X3	102.242	10.9545	0.107143	-3.22239	0.0311858	Yes	0.548765	No	Down
XP_012848891	CDS_31716_Unigene_49445	CDS_29358_Unigene_46693	PREDICTED: uncharacterized protein LOC105968773	728.471	52.5814	0.0721805	-3.79225	0.0312008	Yes	0.548449	No	Down
XP_011096726	CDS_3361_Unigene_7430	CDS_1643_Unigene_3579	lysine-specific demethylase JMJ18	51.1208	709.848	13.8857	3.79553	0.0312333	Yes	0.548443	No	Up
XP_011075330	CDS_7361_Unigene_14666	CDS_20752_Unigene_34101	pentatricopeptide repeat-containing At2g41720	147.885	1597.16	10.8	3.43296	0.03124	Yes	0.547983	No	Up
XP_011097248	CDS_15737_Unigene_27218	CDS_9284_Unigene_16949	floral homeotic APETALA 2-like isoform X1	1950.81	190.607	0.0977071	-3.35539	0.0312767	Yes	0.548049	No	Down
XP_011076614	CDS_6098_Unigene_12437	CDS_27029_Unigene_43326	NRT1 PTR FAMILY	1287.15	11403.6	8.85957	3.14724	0.031351	Yes	0.548774	No	Up
XP_011076390	CDS_17948_Unigene_30326	CDS_18357_Unigene_30568	nicotinamide adenine dinucleotide transporter chloroplastic	827.974	62.4404	0.0754135	-3.72903	0.0313776	Yes	0.548663	No	Down
XP_011087588	CDS_3529_Unigene_7723	CDS_33857_Unigene_54266	ferric reduction oxidase chloroplastic	2839.94	29262.6	10.304	3.36513	0.0314753	Yes	0.549796	No	Up
XP_011096119	CDS_20889_Unigene_34306	CDS_5499_Unigene_10837	PREDICTED: uncharacterized protein LOC105175383	419.008	28.4816	0.0679739	-3.87888	0.0315032	Yes	0.549707	No	Down
XP_011070633	CDS_7251_Unigene_14458	CDS_34470_Unigene_55343	chaperone dnaJ 6	1050.71	86.5402	0.0823632	-3.60186	0.0316412	Yes	0.551536	No	Down
XP_011081872	CDS_21241_Unigene_34845	CDS_15168_Unigene_26084	psbP domain-containing chloroplastic	135.105	1477.76	10.9378	3.45126	0.031761	Yes	0.553046	No	Up
XP_011084991	CDS_25806_Unigene_41082	CDS_28150_Unigene_44969	GUCD1 isoform X2	494.776	33.9588	0.0686347	-3.86492	0.0317817	Yes	0.552829	No	Down
XP_011084891	CDS_37212_Unigene_57147	CDS_31092_Unigene_49199	clathrin heavy chain 2	9861.74	1141.45	0.115746	-3.11097	0.0317982	Yes	0.552539	No	Down
XP_011088157	CDS_28818_Unigene_45341	CDS_19208_Unigene_31785	cytokinin dehydrogenase 6-like	20.996	290.293	13.8261	3.78932	0.0318795	Yes	0.553375	No	Up
XP_011091527	CDS_38056_Unigene_58284	CDS_31813_Unigene_50232	probable phosphoinositide phosphatase SAC9 isoform X1	630.794	5265.8	8.3479	3.06141	0.0319125	Yes	0.553372	No	Up
XP_011069845	CDS_15864_Unigene_27402	CDS_15752_Unigene_26917	probable E3 ubiquitin- ligase XBOS32	398.925	27.3861	0.0686499	-3.8646	0.0319458	Yes	0.553373	No	Down
XP_011096065	CDS_40140_Unigene_63429	CDS_9465_Unigene_17223	tRNA wybutosine-synthesizing 2 3 4	91.2871	1086.68	11.904	3.57337	0.0319773	Yes	0.553344	No	Up
XP_011084475	CDS_39453_Unigene_61651	CDS_3530_Unigene_6987	acidic endochitinase SE2-like	328.634	23.0043	0.07	-3.8365	0.0319863	Yes	0.552924	No	Down
XP_011072889	CDS_31894_Unigene_49702	CDS_24751_Unigene_40038	replication A 70 kDa DNA-binding subunit B	2210.06	225.662	0.102107	-3.29185	0.0320007	Yes	0.552601	No	Down
XP_012859079	CDS_31901_Unigene_49709	CDS_16055_Unigene_27373	pleiotropic drug resistance 3-like	204.483	16.4317	0.0803571	-3.63743	0.0320244	Yes	0.552437	No	Down
XP_011092406	CDS_6243_Unigene_12664	CDS_2510_Unigene_5200	PREDICTED: uncharacterized protein LOC105172591 isoform X2	9.12871	74.4903	8.16	3.02857	0.032061	Yes	0.552497	No	Up
XP_012849061	CDS_34603_Unigene_53688	CDS_30126_Unigene_47876	subtilisin-like protease	15.5188	180.748	11.6471	3.54189	0.0321404	Yes	0.553293	No	Up
XP_011091174	CDS_14242_Unigene_25086	CDS_33529_Unigene_53489	cellulose synthase partial	1782.84	16468.9	9.23748	3.2075	0.0323147	Yes	0.555719	No	Up
XP_011076059	CDS_12056_Unigene_22018	CDS_11919_Unigene_21237	ABC transporter C family member 10	504.818	35.0542	0.0694394	-3.8481	0.0323211	Yes	0.555257	No	Down
XP_011100591	CDS_38414_Unigene_58789	CDS_11169_Unigene_20039	F-box At3g07870-like	474.693	32.8634	0.0692308	-3.85244	0.0323512	Yes	0.555201	No	Down
XP_011088289	CDS_13870_Unigene_24548	CDS_28584_Unigene_45578	polyadenylate-binding RBP47	414.443	3605.11	8.69868	3.1208	0.0323902	Yes	0.555298	No	Up
XP_011073226	CDS_39924_Unigene_62781	CDS_3904_Unigene_7566	tubby 8	715.691	52.5814	0.0734694	-3.76671	0.032401	Yes	0.554912	No	Down
XP_011078891	CDS_9783_Unigene_18636	CDS_8262_Unigene_15365	probable galactinol--sucrose galactosyltransferase 2	1074.45	9126.15	8.4938	3.08641	0.0324097	Yes	0.554492	No	Up
XP_011083302	CDS_12610_Unigene_22791	CDS_17180_Unigene_28927	2-oxoglutarate-dependent dioxygenase DAO-like	359.671	25.1952	0.0700508	-3.83546	0.0326333	Yes	0.557744	No	Down
XP_011074754	CDS_27837_Unigene_44008	CDS_3243_Unigene_6518	PREDICTED: protein FAM188A	124.15	1367.12	11.0118	3.46097	0.0326382	Yes	0.557257	No	Up
XP_011099197	CDS_222_Unigene_482	CDS_2276_Unigene_4822	patatin 2	40.1663	565.25	14.0727	3.81483	0.0327075	Yes	0.557869	No	Up
XP_011100499	CDS_30308_Unigene_47430	CDS_29043_Unigene_46251	ATP-dependent RNA helicase DHX36 isoform X1	73.0297	911.41	12.48	3.64155	0.0327092	Yes	0.557327	No	Up
XP_011097432	CDS_19555_Unigene_32525	CDS_3859_Unigene_7485	PREDICTED: uncharacterized protein LOC105176355	270.21	2529.38	9.36081	3.22663	0.0327566	Yes	0.557565	No	Up
XP_011072899	CDS_40180_Unigene_63653	CDS_6110_Unigene_11989	transcription initiation factor TFIID subunit 11	3959.12	466.66	0.117869	-3.08474	0.0329535	Yes	0.560344	No	Down
XP_011094807	CDS_39810_Unigene_62625	CDS_4004_Unigene_7740	pentatricopeptide repeat-containing mitochondrial	177.097	15.3362	0.0865979	-3.52952	0.032982	Yes	0.560257	No	Down
CDP16415	CDS_19259_Unigene_32118	CDS_13250_Unigene_23184	unnamed protein product	5871.59	714.23	0.121642	-3.03929	0.0329972	Yes	0.559944	No	Down
XP_011094270	CDS_13177_Unigene_23564	CDS_335_Unigene_736	IAA-amino acid hydrolase ILR1-like 3	1012.37	84.3493	0.0833183	-3.58522	0.0330205	Yes	0.55977	No	Down
XP_012837176	CDS_15413_Unigene_26760	CDS_307_Unigene_677	amino acid permease 4-like	922.913	74.4903	0.0807122	-3.63107	0.0330448	Yes	0.559612	No	Down
XP_011098921	CDS_30113_Unigene_47151	CDS_20921_Unigene_34401	PREDICTED: uncharacterized protein LOC105177453 isoform X1	911.045	73.3948	0.0805611	-3.63377	0.0331955	Yes	0.561593	No	Down
XP_011097955	CDS_17580_Unigene_29807	CDS_19117_Unigene_31652	G-type lectin S-receptor-like serine threonine- kinase At4g27290	143.321	1517.19	10.586	3.40408	0.0333116	Yes	0.562986	No	Up
XP_012836744	CDS_3407_Unigene_7493	CDS_29807_Unigene_47379	leucine-rich repeat extensin partial	203.57	1999.19	9.82063	3.29582	0.0334007	Yes	0.563921	No	Up
XP_011071033	CDS_11487_Unigene_21182	CDS_9673_Unigene_17563	NRT1 PTR FAMILY -like	644.487	47.1041	0.0730878	-3.77423	0.0334823	Yes	0.564726	No	Down
XP_011069393	CDS_11712_Unigene_21491	CDS_33664_Unigene_53652	geraniol 8-hydroxylase-like	965.817	7973.74	8.25595	3.04544	0.0336355	Yes	0.566737	No	Up
XP_011070485	CDS_10830_Unigene_20223	CDS_19810_Unigene_32639	PREDICTED: uncharacterized protein LOC105156132	49.295	664.935	13.4889	3.7537	0.0336562	Yes	0.566513	No	Up
XP_011073492	CDS_4919_Unigene_10479	CDS_13188_Unigene_23098	PREDICTED: uncharacterized protein LOC105158432	1197.69	10109.9	8.44116	3.07744	0.0336697	Yes	0.566168	No	Up
XP_012837370	CDS_10906_Unigene_20346	CDS_11042_Unigene_19789	uncharacterized aarF domain-containing kinase chloroplastic	220.915	2125.16	9.61983	3.26601	0.0337353	Yes	0.566699	No	Up
XP_011094693	CDS_1812_Unigene_4281	CDS_33047_Unigene_52562	PREDICTED: uncharacterized protein LOC105174330	17.3445	208.135	12	3.58496	0.0338027	Yes	0.567258	No	Up
XP_012840751	CDS_18626_Unigene_31229	CDS_3396_Unigene_6773	PREDICTED: uncharacterized protein LOC105961060	41.9921	577.3	13.7478	3.78113	0.0338644	Yes	0.567723	No	Up
XP_011088202	CDS_23344_Unigene_37717	CDS_1525_Unigene_3403	triacylglycerol lipase 1 isoform X1	322.243	2877.73	8.93031	3.15871	0.0339578	Yes	0.568716	No	Up
XP_011077732	CDS_36230_Unigene_55781	CDS_29638_Unigene_47100	tRNA-specific adenosine deaminase 2	150.624	14.2408	0.0945455	-3.40285	0.0340403	Yes	0.569526	No	Down
XP_011079039	CDS_18264_Unigene_30750	CDS_18930_Unigene_31404	zinc finger CONSTANS-LIKE 1-like	204.483	1990.42	9.73393	3.28302	0.0340566	Yes	0.569226	No	Up
XP_012842223	CDS_40534_Unigene_64376	CDS_34099_Unigene_54590	uncharacterized mitochondrial ymf11	48.3822	649.599	13.4264	3.747	0.0341918	Yes	0.570915	No	Up
XP_010927587	CDS_29570_Unigene_46362	CDS_26459_Unigene_42510	zinc finger BED domain-containing RICESLEEPER 2-like	254.691	19.718	0.0774194	-3.69116	0.034256	Yes	0.571413	No	Down
XP_011069419	CDS_27283_Unigene_43214	CDS_23863_Unigene_38678	NAC domain-containing 2	919.261	7492.84	8.15094	3.02697	0.0342851	Yes	0.571327	No	Up
XP_011078539	CDS_1454_Unigene_3165	CDS_2381_Unigene_4988	probable anion transporter chloroplastic isoform X1	277.513	2534.86	9.13421	3.19128	0.0343771	Yes	0.572288	No	Up
XP_011089374	CDS_35111_Unigene_54353	CDS_29937_Unigene_47588	PREDICTED: LOW QUALITY PROTEIN: uncharacterized protein LOC105170344	3984.68	479.805	0.120412	-3.05394	0.0344073	Yes	0.57222	No	Down
XP_011069974	CDS_7254_Unigene_14466	CDS_14223_Unigene_24640	xylosyltransferase 1	27.3861	376.833	13.76	3.78241	0.0344325	Yes	0.572067	No	Up
XP_011095567	CDS_15304_Unigene_26589	CDS_4652_Unigene_9047	PREDICTED: uncharacterized protein LOC105174980	274.774	2511.86	9.14153	3.19244	0.0344655	Yes	0.572045	No	Up
XP_012856941	CDS_20248_Unigene_33415	CDS_1132_Unigene_2483	late blight resistance homolog R1B-8	211.786	17.5271	0.0827586	-3.59495	0.0345328	Yes	0.572592	No	Down
XP_011069846	CDS_38561_Unigene_59128	CDS_5370_Unigene_10551	RING-H2 finger ATL13 isoform X1	28.299	388.883	13.7419	3.78051	0.0346298	Yes	0.57363	No	Up
AIU99497	CDS_31669_Unigene_49379	CDS_24895_Unigene_40254	Acyl-ACP Thioesterase B	5712.75	710.944	0.124449	-3.00638	0.0346801	Yes	0.573893	No	Down
XP_011082154	CDS_24261_Unigene_39005	CDS_1838_Unigene_3954	PREDICTED: uncharacterized protein LOC105164987	361.497	26.2907	0.0727273	-3.78136	0.0347271	Yes	0.5741	No	Down
EYU42959	CDS_23434_Unigene_37869	CDS_34167_Unigene_54717	hypothetical protein MIMGU_mgv1a013825mg	140.582	1466.8	10.4338	3.38319	0.034813	Yes	0.574949	No	Up
XP_011097537	CDS_31472_Unigene_49091	CDS_29898_Unigene_47529	14-3-3 16R	2030.22	18404.6	9.06529	3.18035	0.0348398	Yes	0.574822	No	Up
XP_009620251	CDS_33743_Unigene_52474	CDS_26095_Unigene_41985	zinc finger JACKDAW-like	94.0257	10.9545	0.116505	-3.10154	0.034926	Yes	0.575675	No	Down
XP_011094392	CDS_13088_Unigene_23430	CDS_21123_Unigene_34719	serine threonine- kinase D6PKL1-like	986.813	84.3493	0.0854764	-3.54833	0.0350577	Yes	0.577274	No	Down
XP_011102180	CDS_17622_Unigene_29877	CDS_5040_Unigene_9768	PREDICTED: uncharacterized protein LOC105180214	2128.82	225.662	0.106003	-3.23782	0.035089	Yes	0.577219	No	Down
XP_011082896	CDS_30108_Unigene_47144	CDS_18926_Unigene_31401	subtilisin-like protease	1901.51	196.085	0.10312	-3.2776	0.0351711	Yes	0.577999	No	Down
XP_011095102	CDS_10238_Unigene_19355	CDS_7005_Unigene_13423	alanine--glyoxylate aminotransferase 2 homolog mitochondrial	36.5148	496.237	13.59	3.76447	0.0352472	Yes	0.57868	No	Up
XP_011078139	CDS_12633_Unigene_22831	CDS_5758_Unigene_11363	respiratory burst oxidase homolog E	166.143	15.3362	0.0923077	-3.43741	0.0352805	Yes	0.578656	No	Down
XP_011100935	CDS_22081_Unigene_36087	CDS_17989_Unigene_30134	probable mediator of RNA polymerase II transcription subunit 26c	61.1624	771.193	12.609	3.65638	0.0352819	Yes	0.578109	No	Up
XP_011091932	CDS_13233_Unigene_23637	CDS_12060_Unigene_21446	PREDICTED: uncharacterized protein LOC105172257	1750.89	177.462	0.101356	-3.3025	0.0354673	Yes	0.580577	No	Down
EYU22024	CDS_1220_Unigene_2693	CDS_22444_Unigene_36590	hypothetical protein MIMGU_mgv1a003289mg	1382.09	11595.3	8.3897	3.06862	0.0354843	Yes	0.580285	No	Up
XP_011083592	CDS_5244_Unigene_11034	CDS_33957_Unigene_54395	galactose oxidase-like	24.6475	327.538	13.2889	3.73215	0.0354926	Yes	0.579851	No	Up
XP_012828924	CDS_14144_Unigene_24970	CDS_7368_Unigene_13951	G-type lectin S-receptor-like serine threonine- kinase RLK1	175.271	1730.8	9.875	3.30378	0.0355293	Yes	0.579882	No	Up
XP_012829432	CDS_25440_Unigene_40618	CDS_29679_Unigene_47168	UDP-glycosyltransferase 74E2-like	2545.08	284.816	0.111908	-3.15961	0.0359126	Yes	0.585566	No	Down
XP_011099088	CDS_17901_Unigene_30261	CDS_20596_Unigene_33907	ATP-dependent zinc metalloprotease FTSH chloroplastic	382.493	3234.85	8.45728	3.08019	0.035999	Yes	0.5864	No	Up
XP_011072111	CDS_38096_Unigene_58348	CDS_31834_Unigene_50274	PREDICTED: uncharacterized protein LOC105157397	164.317	1635.5	9.95333	3.31518	0.0360073	Yes	0.585962	No	Up
XP_011077639	CDS_1434_Unigene_3146	CDS_4597_Unigene_8959	PREDICTED: laccase-17-like	31.9505	429.414	13.44	3.74846	0.0361096	Yes	0.587053	No	Up
ABD77416	CDS_20261_Unigene_33437	CDS_6486_Unigene_12552	limonene synthase	223.653	18.6226	0.0832653	-3.58614	0.0361122	Yes	0.586524	No	Down
XP_011089318	CDS_33739_Unigene_52469	CDS_26090_Unigene_41975	zinc finger JACKDAW	4563.44	572.918	0.125545	-2.99372	0.0361668	Yes	0.586839	No	Down
XP_011076663	CDS_9693_Unigene_18499	CDS_33022_Unigene_52502	sister chromatid cohesion 1 1	122.325	13.1453	0.107463	-3.21809	0.0362984	Yes	0.588402	No	Down
XP_011080400	CDS_5262_Unigene_11082	CDS_1770_Unigene_3753	PREDICTED: uncharacterized protein LOC105163661	161.578	15.3362	0.0949153	-3.39722	0.0363367	Yes	0.58845	No	Down
XP_011100697	CDS_18036_Unigene_30456	CDS_24044_Unigene_38966	DNA (cytosine-5)-methyltransferase DRM1 isoform X1	160.665	1596.06	9.93409	3.31239	0.0365798	Yes	0.591812	No	Up
XP_011073719	CDS_7367_Unigene_14675	CDS_259_Unigene_559	PREDICTED: uncharacterized protein LOC105158608	180.748	16.4317	0.0909091	-3.45943	0.0365902	Yes	0.591406	No	Down
XP_011076030	CDS_2637_Unigene_6093	CDS_4160_Unigene_8033	transcription factor SPEECHLESS-like	18.2574	210.325	11.52	3.52607	0.0366211	Yes	0.591331	No	Up
XP_011075929	CDS_15575_Unigene_26981	CDS_14158_Unigene_24526	rhodanese-like domain-containing chloroplastic	26350	2814.2	0.106801	-3.22701	0.0367355	Yes	0.592604	No	Down
XP_011094815	CDS_24088_Unigene_38758	CDS_20829_Unigene_34230	WAT1-related At2g37460-like	111.37	1191.84	10.7016	3.41976	0.0367864	Yes	0.592851	No	Up
XP_011077901	CDS_13730_Unigene_24334	CDS_1509_Unigene_3379	sodium transporter HKT1-like	24.6475	318.775	12.9333	3.69302	0.0368541	Yes	0.59337	No	Up
XP_012834903	CDS_20705_Unigene_34060	CDS_13592_Unigene_23702	CDP-diacylglycerol--glycerol-3-phosphate 3-phosphatidyltransferase 2-like	83.9841	960.705	11.4391	3.51591	0.0368587	Yes	0.592871	No	Up
XP_012078858	CDS_22011_Unigene_35987	CDS_22848_Unigene_37237	glutathione S-transferase zeta class-like	362.41	3065.06	8.45743	3.08022	0.0368731	Yes	0.592529	No	Up
XP_011072810	CDS_33137_Unigene_51574	CDS_29279_Unigene_46579	formin 20 isoform X2	955.776	83.2538	0.087106	-3.52108	0.0369089	Yes	0.592534	No	Down
XP_011073561	CDS_39010_Unigene_60467	CDS_2622_Unigene_5335	PREDICTED: uncharacterized protein LOC105158475	31.0376	410.792	13.2353	3.72632	0.0369789	Yes	0.593085	No	Up
CDO96917	CDS_37835_Unigene_57988	CDS_27195_Unigene_43549	unnamed protein product	7145.04	910.315	0.127405	-2.9725	0.0370525	Yes	0.593695	No	Down
XP_004244292	CDS_20162_Unigene_33314	CDS_4029_Unigene_7770	PREDICTED: uncharacterized protein LOC101248500	18.2574	208.135	11.4	3.51096	0.0370531	Yes	0.593134	No	Up
XP_012858407	CDS_24801_Unigene_39739	CDS_6018_Unigene_11854	PREDICTED: uncharacterized protein LOC105977627	1469.72	145.694	0.0991304	-3.33453	0.0371283	Yes	0.593768	No	Down
XP_011082331	CDS_39603_Unigene_61873	CDS_6057_Unigene_11907	cellulose synthase G3	1155.69	9236.79	7.99242	2.99863	0.0371353	Yes	0.59331	No	Up
XP_011093686	CDS_2094_Unigene_4722	CDS_4701_Unigene_9144	arginine N-methyltransferase	3027.08	358.211	0.118335	-3.07905	0.0371852	Yes	0.593539	No	Down
XP_011097476	CDS_17736_Unigene_30056	CDS_5576_Unigene_10998	PREDICTED: uncharacterized protein At4g38062	157.927	15.3362	0.0971098	-3.36424	0.0372298	Yes	0.593681	No	Down
XP_012856881	CDS_1562_Unigene_3461	CDS_8537_Unigene_15780	glutamate receptor -like	9.12871	67.9176	7.44	2.8953	0.037264	Yes	0.593659	No	Up
XP_011095041	CDS_5692_Unigene_11792	CDS_8786_Unigene_16196	dnaJ ERDJ3A	47.4693	611.258	12.8769	3.68672	0.0372777	Yes	0.59331	No	Up
XP_011077690	CDS_16279_Unigene_28049	CDS_12434_Unigene_22002	PREDICTED: uncharacterized protein LOC105161639	38.3406	502.809	13.1143	3.71307	0.0373167	Yes	0.593363	No	Up
XP_011080388	CDS_1164_Unigene_2595	CDS_10819_Unigene_19427	F-box At4g18380-like	2620.85	301.247	0.114943	-3.12102	0.0373996	Yes	0.594116	No	Down
EPS67945	CDS_15699_Unigene_27161	CDS_17475_Unigene_29316	hypothetical protein M569_06829	52.9465	668.222	12.6207	3.65772	0.0375042	Yes	0.595209	No	Up
XP_011096532	CDS_26111_Unigene_41523	CDS_1742_Unigene_3725	probable LRR receptor-like serine threonine- kinase At3g47570	373.364	28.4816	0.0762836	-3.71248	0.0377071	Yes	0.597861	No	Down
XP_011073037	CDS_27827_Unigene_43997	CDS_28159_Unigene_44985	retrovirus-related Pol poly from transposon TNT 1-94	23.7346	299.057	12.6	3.65535	0.037714	Yes	0.597401	No	Up
XP_011069822	CDS_24364_Unigene_39140	CDS_10585_Unigene_19103	probable LRR receptor-like serine threonine- kinase At4g30520	194.442	17.5271	0.0901408	-3.47168	0.0379539	Yes	0.600631	No	Down
XP_011082033	CDS_16831_Unigene_28793	CDS_9622_Unigene_17496	phosphopantothenoylcysteine decarboxylase subunit VHS3-like	2432.8	277.148	0.113921	-3.13389	0.0379763	Yes	0.600415	No	Down
XP_011098614	CDS_28691_Unigene_45162	CDS_2086_Unigene_4467	thyroid adenoma-associated homolog	512.121	39.436	0.0770053	-3.6989	0.0381846	Yes	0.603136	No	Down
XP_011070914	CDS_1208_Unigene_2672	CDS_3326_Unigene_6659	squamosa promoter-binding partial	53.8594	671.508	12.4678	3.64013	0.038198	Yes	0.602777	No	Up
XP_009397784	CDS_31795_Unigene_49561	CDS_23748_Unigene_38484	translation factor SUI1 homolog 2	892.788	6896.92	7.72515	2.94956	0.0382115	Yes	0.602418	No	Up
XP_011078637	CDS_1207_Unigene_2672	CDS_18664_Unigene_30996	squamosa promoter-binding 6	89.4614	990.282	11.0694	3.4685	0.0383447	Yes	0.603947	No	Up
AMA07777	CDS_28783_Unigene_45277	CDS_28188_Unigene_45036	YABBY family 6	1022.42	93.1128	0.0910714	-3.45686	0.0383472	Yes	0.603417	No	Down
XP_011093539	CDS_37587_Unigene_57672	CDS_31183_Unigene_49303	clustered mitochondria -like isoform X1	973.12	7535.57	7.74371	2.95303	0.0384009	Yes	0.603692	No	Up
AGX15389	CDS_4770_Unigene_10190	CDS_5400_Unigene_10626	flavonoid 3 monooxygenase	515.772	4052.05	7.85628	2.97385	0.0384606	Yes	0.604059	No	Up
XP_011087888	CDS_38353_Unigene_58711	CDS_2772_Unigene_5562	PREDICTED: uncharacterized protein LOC105169226	144.234	1433.94	9.94177	3.3135	0.0384935	Yes	0.604007	No	Up
XP_012829252	CDS_17541_Unigene_29759	CDS_6924_Unigene_13302	late blight resistance homolog R1A-10	5509.18	719.707	0.130638	-2.93635	0.038562	Yes	0.604513	No	Down
EYU27442	CDS_10430_Unigene_19655	CDS_11924_Unigene_21241	hypothetical protein MIMGU_mgv1a002948mg	809.717	69.013	0.0852311	-3.55248	0.0390383	Yes	0.611405	No	Down
XP_011071268	CDS_14013_Unigene_24755	CDS_12086_Unigene_21474	pentatricopeptide repeat-containing At1g13630	14.6059	134.74	9.225	3.20555	0.0390672	Yes	0.611282	No	Up
XP_011091176	CDS_21731_Unigene_35557	CDS_25905_Unigene_41711	PREDICTED: uncharacterized protein LOC105171682	61.1624	735.044	12.0179	3.58711	0.0391135	Yes	0.611433	No	Up
XP_011080628	CDS_12131_Unigene_22125	CDS_8211_Unigene_15302	ABC transporter B family member mitochondrial	4528.75	590.445	0.130377	-2.93924	0.0392905	Yes	0.613624	No	Down
XP_011092097	CDS_9029_Unigene_17490	CDS_2084_Unigene_4466	bifunctional epoxide hydrolase 2	200.832	1844.73	9.18545	3.19935	0.0395191	Yes	0.616616	No	Up
XP_011094217	CDS_17725_Unigene_30043	CDS_1018_Unigene_2164	PREDICTED: uncharacterized protein LOC105173972	187.139	17.5271	0.0936585	-3.41645	0.0395874	Yes	0.617105	No	Down
XP_011072934	CDS_40268_Unigene_63761	CDS_1675_Unigene_3636	ASPARTIC PROTEASE IN GUARD CELL 1-like	4944.11	652.885	0.132053	-2.92081	0.0397585	Yes	0.619193	No	Down
ADD14078	CDS_21589_Unigene_35416	CDS_519_Unigene_1122	phenylcoumaran benzylic ether reductase	1279.85	127.072	0.0992867	-3.33226	0.039797	Yes	0.619213	No	Down
XP_012835010	CDS_19421_Unigene_32336	CDS_895_Unigene_1975	proline dehydrogenase mitochondrial	74.8554	851.161	11.3707	3.50725	0.039865	Yes	0.619692	No	Up
XP_012850354	CDS_12195_Unigene_22202	CDS_1674_Unigene_3635	PREDICTED: uncharacterized protein LOC105970106 isoform X2	294.857	24.0998	0.0817337	-3.61292	0.0400039	Yes	0.621272	No	Down
XP_011089708	CDS_22259_Unigene_36337	CDS_15262_Unigene_26222	probable receptor kinase At5g56460	44.7307	557.582	12.4653	3.63985	0.0400063	Yes	0.620731	No	Up
XP_011093564	CDS_10638_Unigene_19930	CDS_32196_Unigene_50766	nuclear pore complex NUP205 isoform X2	189.877	1753.81	9.23654	3.20735	0.0400652	Yes	0.621066	No	Up
AIU99492	CDS_3653_Unigene_7923	CDS_4756_Unigene_9240	Biotin Carboxyl Carrier	750.38	63.5358	0.0846715	-3.56198	0.0401091	Yes	0.62117	No	Down
XP_011080097	CDS_23039_Unigene_37326	CDS_7232_Unigene_13748	cellulose synthase A catalytic subunit 4 [UDP-forming]	156.101	1499.66	9.60702	3.26409	0.0401313	Yes	0.620936	No	Up
XP_011084724	CDS_22801_Unigene_37006	CDS_11224_Unigene_20117	GDSL esterase lipase At5g33370-like	510.295	40.5315	0.0794275	-3.65422	0.0401691	Yes	0.620945	No	Down
XP_011078223	CDS_23967_Unigene_38577	CDS_7962_Unigene_14934	wall-associated receptor kinase-like 8	240.085	20.8135	0.086692	-3.52796	0.0402994	Yes	0.622382	No	Down
XP_011085545	CDS_28087_Unigene_44349	CDS_18155_Unigene_30317	PREDICTED: uncharacterized protein LOC105167487	817.019	71.2039	0.0871508	-3.52034	0.0403302	Yes	0.622281	No	Down
XP_011084167	CDS_23912_Unigene_38514	CDS_27333_Unigene_43774	solute carrier family 35 member F1-like isoform X2	2616.29	312.202	0.11933	-3.06697	0.0403381	Yes	0.621826	No	Down
AKT44365	CDS_1638_Unigene_3760	CDS_33772_Unigene_53864	heat shock 3	17.3445	176.367	10.1684	3.34602	0.0405361	Yes	0.624301	No	Up
XP_002530280	CDS_35583_Unigene_55006	CDS_27295_Unigene_43721	Aquaporin PIP2.1, putative	305.812	2564.44	8.38567	3.06793	0.040575	Yes	0.624323	No	Up
XP_011075410	CDS_13595_Unigene_24155	CDS_3977_Unigene_7688	haloacid dehalogenase-like hydrolase domain-containing 3	1840.35	15058	8.18214	3.03248	0.0405879	Yes	0.623946	No	Up
XP_011075601	CDS_36315_Unigene_55930	CDS_29844_Unigene_47441	mitogen-activated kinase 9-like	528.552	4045.48	7.65389	2.93619	0.0406604	Yes	0.624484	No	Up
XP_011077275	CDS_21374_Unigene_35049	CDS_4884_Unigene_9519	ABC transporter G family member 24-like	2703.92	326.443	0.120729	-3.05015	0.0407066	Yes	0.624617	No	Down
XP_007040322	CDS_20763_Unigene_34134	CDS_8474_Unigene_15679	POX family isoform 1	897.352	81.0629	0.0903357	-3.46856	0.0407175	Yes	0.624211	No	Down
XP_011094926	CDS_15511_Unigene_26886	CDS_19894_Unigene_32826	NRT1 PTR FAMILY -like	72.1168	818.298	11.3468	3.50422	0.0408497	Yes	0.625661	No	Up
XP_012849133	CDS_5102_Unigene_10794	CDS_10672_Unigene_19241	5 -adenylylsulfate reductase chloroplastic-like isoform X2	1040.67	7846.67	7.54	2.91456	0.0409321	Yes	0.626347	No	Up
XP_012831444	CDS_22850_Unigene_37079	CDS_27235_Unigene_43623	ECERIFERUM 1-like isoform X1	579.673	4376.3	7.54961	2.9164	0.0409416	Yes	0.625918	No	Up
XP_012830565	CDS_26616_Unigene_42258	CDS_25556_Unigene_41182	pyruvate dehydrogenase E1 component subunit beta- mitochondrial	733.035	62.4404	0.0851806	-3.55333	0.0409468	Yes	0.625424	No	Down
AIO09733	CDS_1961_Unigene_4519	CDS_14314_Unigene_24779	transcription factor MYC2	509.382	3906.36	7.66882	2.939	0.0409565	Yes	0.624999	No	Up
XP_012858958	CDS_4927_Unigene_10498	CDS_1757_Unigene_3741	ATP-dependent Clp protease proteolytic subunit-related chloroplastic	793.285	5906.64	7.4458	2.89643	0.040994	Yes	0.624999	No	Up
XP_012849987	CDS_16744_Unigene_28687	CDS_11220_Unigene_20106	lupeol synthase-like	1044.32	99.6855	0.0954545	-3.38904	0.041127	Yes	0.626454	No	Down
XP_011087884	CDS_4987_Unigene_10610	CDS_2285_Unigene_4832	copper-transporting ATPase chloroplastic	134.192	1315.63	9.80408	3.29338	0.0411279	Yes	0.625895	No	Up
XP_011073926	CDS_28537_Unigene_44986	CDS_22262_Unigene_36325	DNA topoisomerase 3-beta isoform X2	1676.94	181.844	0.108438	-3.20506	0.0411474	Yes	0.625621	No	Down
XP_011100369	CDS_11013_Unigene_20483	CDS_1191_Unigene_2652	pentatricopeptide repeat-containing mitochondrial	125.976	14.2408	0.113043	-3.14505	0.041182	Yes	0.625575	No	Down
XP_011095594	CDS_10467_Unigene_19719	CDS_16655_Unigene_28207	PREDICTED: uncharacterized protein LOC105175002 isoform X1	1026.07	97.4946	0.0950178	-3.39566	0.0411986	Yes	0.625258	No	Down
XP_011093533	CDS_21462_Unigene_35213	CDS_20058_Unigene_33058	PREDICTED: uncharacterized protein LOC105173480	3437.87	439.273	0.127775	-2.96832	0.0412089	Yes	0.624845	No	Down
XP_011095874	CDS_11616_Unigene_21341	CDS_13064_Unigene_22905	DNA-directed RNA polymerases IV and V subunit 4	1190.38	118.308	0.0993865	-3.33081	0.0412463	Yes	0.624844	No	Down
XP_011091140	CDS_11133_Unigene_20649	CDS_4117_Unigene_7903	PREDICTED: uncharacterized protein LOC105171651 isoform X2	660.006	4913.07	7.44398	2.89607	0.041264	Yes	0.624544	No	Up
XP_011095264	CDS_37374_Unigene_57334	CDS_13080_Unigene_22935	cyclic nucleotide-gated ion channel 4	2296.78	269.479	0.117329	-3.09137	0.0413005	Yes	0.62453	No	Down
XP_011079018	CDS_564_Unigene_1265	CDS_14109_Unigene_24435	TRANSPARENT TESTA 12-like	2059.44	235.521	0.114362	-3.12832	0.0413041	Yes	0.624018	No	Down
XP_011086973	CDS_17735_Unigene_30054	CDS_15822_Unigene_27030	homeobox-leucine zipper HDG11	219.089	1941.13	8.86	3.14731	0.0413251	Yes	0.62377	No	Up
ALV83447	CDS_4379_Unigene_9475	CDS_1038_Unigene_2209	7-deoxyloganetic acid-O-glucosyl transferase 1	953.95	88.7311	0.0930144	-3.4264	0.0413588	Yes	0.623713	No	Down
XP_011076735	CDS_27780_Unigene_43936	CDS_28893_Unigene_46030	coronatine-insensitive 1	584.237	4381.78	7.5	2.90689	0.0415064	Yes	0.625373	No	Up
XP_011100775	CDS_123_Unigene_296	CDS_33764_Unigene_53839	ocs element-binding factor 1-like	26.4733	318.775	12.0414	3.58993	0.0415065	Yes	0.624809	No	Up
XP_011086974	CDS_12964_Unigene_23271	CDS_7207_Unigene_13713	probable cyclic nucleotide-gated ion channel chloroplastic	336.849	2750.66	8.16585	3.0296	0.0415217	Yes	0.624475	No	Up
AGN52091	CDS_10892_Unigene_20323	CDS_4852_Unigene_9442	MYB-related transcription factor	1160.26	115.022	0.0991345	-3.33447	0.0415819	Yes	0.624816	No	Down
XP_011096005	CDS_20379_Unigene_33607	CDS_16774_Unigene_28366	probable serine threonine- kinase DDB_G0282963 isoform X2	111.37	1129.4	10.141	3.34213	0.0416149	Yes	0.624748	No	Up
XP_011099238	CDS_8868_Unigene_17237	CDS_7816_Unigene_14710	B3 domain-containing At5g66980	420.833	33.9588	0.0806941	-3.63139	0.0416316	Yes	0.624436	No	Down
XP_011079012	CDS_20148_Unigene_33307	CDS_25054_Unigene_40483	glutamate receptor	34.6891	427.224	12.3158	3.62244	0.0416428	Yes	0.624042	No	Up
XP_011071892	CDS_11430_Unigene_21111	CDS_9246_Unigene_16900	PREDICTED: uncharacterized protein LOC105157238 isoform X1	1171.21	8839.15	7.547	2.9159	0.041688	Yes	0.62416	No	Up
XP_011097429	CDS_4544_Unigene_9767	CDS_33438_Unigene_53392	peptide deformylase chloroplastic	558.677	4199.94	7.51765	2.91028	0.0417637	Yes	0.624731	No	Up
XP_011083721	CDS_4345_Unigene_9395	CDS_6383_Unigene_12410	J domain-containing required for chloroplast accumulation response 1 isoform X1	782.33	5773	7.37923	2.88347	0.0417741	Yes	0.624326	No	Up
XP_011088029	CDS_25097_Unigene_40165	CDS_23980_Unigene_38853	PREDICTED: protein starmaker-like	161.578	1513.91	9.36949	3.22797	0.0418421	Yes	0.624782	No	Up
XP_012828204	CDS_32469_Unigene_50598	CDS_23369_Unigene_38009	hydroxymethylglutaryl- mitochondrial-like	31.9505	391.074	12.24	3.61353	0.0418854	Yes	0.624869	No	Up
XP_011072267	CDS_6783_Unigene_13626	CDS_13761_Unigene_23946	pleiotropic drug resistance 1-like	16.4317	155.553	9.46667	3.24286	0.0420131	Yes	0.626213	No	Up
XP_012852805	CDS_34262_Unigene_53161	CDS_29366_Unigene_46703	PREDICTED: uncharacterized protein LOC105972398	67.5524	767.907	11.3676	3.50685	0.0420362	Yes	0.625998	No	Up
KQK90143	CDS_38435_Unigene_58826	CDS_32952_Unigene_52098	hypothetical protein SETIT_039246mg, partial	10229.6	1340.82	0.131073	-2.93156	0.0420704	Yes	0.625948	No	Down
XP_012847891	CDS_1860_Unigene_4362	CDS_11874_Unigene_21158	anthocyanidin 3-O-glucosyltransferase 5-like	1079.01	8047.14	7.45787	2.89876	0.0420786	Yes	0.625511	No	Up
XP_011091082	CDS_12900_Unigene_23163	CDS_5272_Unigene_10276	PREDICTED: uncharacterized protein LOC105171616	2041.18	16610.2	8.13757	3.0246	0.042267	Yes	0.627751	No	Up
XP_010257205	CDS_453_Unigene_991	CDS_1507_Unigene_3376	remorin-like isoform X1	139.669	1341.92	9.60784	3.26421	0.042276	Yes	0.627326	No	Up
XP_012831298	CDS_22995_Unigene_37285	CDS_18560_Unigene_30878	FGGY carbohydrate kinase domain-containing isoform X2	176.184	17.5271	0.0994819	-3.32942	0.0423042	Yes	0.627187	No	Down
XP_011093557	CDS_31241_Unigene_48777	CDS_18191_Unigene_30376	NRT1 PTR FAMILY -like	412.618	3226.09	7.81858	2.96691	0.0423403	Yes	0.627164	No	Up
XP_011081487	CDS_9595_Unigene_18351	CDS_1602_Unigene_3515	U-box domain-containing 45-like	185.313	1679.32	9.06207	3.17984	0.0423927	Yes	0.627382	No	Up
XP_011079166	CDS_22203_Unigene_36271	CDS_28329_Unigene_45213	PREDICTED: uncharacterized protein LOC105162745	41.0792	497.332	12.1067	3.59773	0.0425565	Yes	0.629248	No	Up
XP_012835479	CDS_25511_Unigene_40698	CDS_24084_Unigene_39030	lysophospholipid acyltransferase 1-like	74.8554	825.966	11.0341	3.4639	0.0426037	Yes	0.629386	No	Up
XP_011072253	CDS_20769_Unigene_34138	CDS_8558_Unigene_15811	bifunctional UDP-glucose 4-epimerase and UDP-xylose 4-epimerase 1-like	366.061	2912.79	7.95711	2.99224	0.0426717	Yes	0.629833	No	Up
XP_011094798	CDS_30874_Unigene_48265	CDS_25910_Unigene_41718	PREDICTED: uncharacterized protein LOC105174401 isoform X1	52.9465	624.404	11.7931	3.55987	0.042824	Yes	0.631521	No	Up
XP_011088479	CDS_30906_Unigene_48310	CDS_6330_Unigene_12335	hematopoietic lineage cell-specific -like	696.521	60.2495	0.0865007	-3.53115	0.0429145	Yes	0.632296	No	Down
XP_011091432	CDS_8981_Unigene_17426	CDS_31628_Unigene_49954	myb family transcription factor APL-like isoform X2	318.592	2589.63	8.12837	3.02297	0.042988	Yes	0.63282	No	Up
XP_011082023	CDS_12094_Unigene_22076	CDS_12915_Unigene_22689	PREDICTED: uncharacterized protein At1g32220, chloroplastic isoform X2	140.582	1337.54	9.51429	3.2501	0.0430973	Yes	0.63387	No	Up
XP_009757909	CDS_2271_Unigene_5136	CDS_26664_Unigene_42783	pyruvate cytosolic isozyme	25.5604	296.866	11.6143	3.53783	0.0431189	Yes	0.633627	No	Up
XP_012845429	CDS_9402_Unigene_18098	CDS_34211_Unigene_54856	nudix hydrolase 8-like isoform X1	190.79	18.6226	0.0976077	-3.35686	0.0431946	Yes	0.63418	No	Down
XP_011082181	CDS_297_Unigene_639	CDS_1699_Unigene_3668	PREDICTED: uncharacterized protein LOC105165005	978.598	94.2083	0.0962687	-3.37679	0.0432537	Yes	0.634489	No	Down
CDP01211	CDS_17789_Unigene_30120	CDS_15914_Unigene_27149	unnamed protein product	39.2534	471.041	12	3.58496	0.0433452	Yes	0.635273	No	Up
XP_011075531	CDS_20206_Unigene_33365	CDS_24451_Unigene_39611	PREDICTED: uncharacterized protein LOC105159991	396.186	32.8634	0.0829493	-3.59163	0.0434297	Yes	0.635951	No	Down
XP_011088543	CDS_16676_Unigene_28581	CDS_26781_Unigene_42949	tRNA-dihydrouridine(47) synthase [NAD(P)(+)]-like isoform X1	390.709	3050.81	7.80841	2.96503	0.0434599	Yes	0.635835	No	Up
XP_012848908	CDS_20635_Unigene_33956	CDS_15152_Unigene_26052	serine threonine- kinase	127.802	1234.57	9.66	3.27202	0.0434787	Yes	0.635552	No	Up
XP_011076597	CDS_9085_Unigene_17590	CDS_32425_Unigene_51033	PREDICTED: uncharacterized protein LOC105160806	834.364	6042.48	7.24201	2.85639	0.0435784	Yes	0.636451	No	Up
AKA27918	CDS_11035_Unigene_20507	CDS_2408_Unigene_5041	WRKY protein	778.679	70.1085	0.0900352	-3.47337	0.0436221	Yes	0.636531	No	Down
XP_011076203	CDS_38479_Unigene_58909	CDS_1792_Unigene_3831	leucine-rich repeat receptor kinase EXS	275.687	24.0998	0.0874172	-3.51594	0.0436235	Yes	0.635995	No	Down
XP_011071378	CDS_15241_Unigene_26483	CDS_14010_Unigene_24289	ATP-citrate synthase beta chain 2	2318.69	280.434	0.120945	-3.04758	0.0436388	Yes	0.635662	No	Down
ABZ89182	CDS_38962_Unigene_60137	CDS_34144_Unigene_54667	putative protein	14.6059	121.594	8.325	3.05745	0.0437321	Yes	0.636464	No	Up
XP_011076083	CDS_27388_Unigene_43350	CDS_7498_Unigene_14130	ABC transporter G family member 8-like	92.2	956.324	10.3723	3.37466	0.0437363	Yes	0.635971	No	Up
EYU17681	CDS_1453_Unigene_3164	CDS_12461_Unigene_22029	hypothetical protein MIMGU_mgv1a022408mg	32.8634	391.074	11.9	3.57289	0.0438554	Yes	0.637146	No	Up
XP_012858290	CDS_27716_Unigene_43826	CDS_19519_Unigene_32229	cytochrome b5 isoform E-like	2943.1	375.738	0.127667	-2.96954	0.0438988	Yes	0.637221	No	Down
XP_011081592	CDS_37865_Unigene_58027	CDS_1925_Unigene_4195	myosin-15 isoform X1	1606.65	178.558	0.111136	-3.1696	0.0439548	Yes	0.637479	No	Down
XP_011072566	CDS_1346_Unigene_2920	CDS_1378_Unigene_3155	phospholipid:diacylglycerol acyltransferase 1-like	1058.02	7692.22	7.27041	2.86204	0.0441697	Yes	0.640039	No	Up
XP_011075686	CDS_14893_Unigene_26027	CDS_17893_Unigene_29983	PREDICTED: uncharacterized protein LOC105160119	686.479	60.2495	0.087766	-3.51019	0.0441946	Yes	0.639843	No	Down
XP_011096428	CDS_28010_Unigene_44247	CDS_31256_Unigene_49409	UBP1-associated 2C	949.386	6857.49	7.22308	2.85261	0.0442081	Yes	0.639482	No	Up
XP_011099123	CDS_12486_Unigene_22638	CDS_5998_Unigene_11822	DNA polymerase alpha catalytic subunit	165.23	1504.05	9.10276	3.1863	0.0442619	Yes	0.639705	No	Up
XP_011099561	CDS_29807_Unigene_46687	CDS_21917_Unigene_35827	ubiquitin receptor RAD23c-like	6963.38	965.087	0.138595	-2.85106	0.0443936	Yes	0.641053	No	Down
XP_009622654	CDS_2910_Unigene_6603	CDS_32398_Unigene_51001	acid phosphatase 1-like	2346.08	287.007	0.122335	-3.0311	0.0443951	Yes	0.64052	No	Down
EYU32914	CDS_1292_Unigene_2808	CDS_4383_Unigene_8556	hypothetical protein MIMGU_mgv1a026403mg, partial	12.7802	2.19089	0.171429	-2.54432	0.0444144	Yes	0.640244	No	Down
XP_011098857	CDS_2167_Unigene_4881	CDS_34551_Unigene_55482	calcium-binding partial	10.9545	77.7766	7.1	2.82782	0.0444294	Yes	0.639906	No	Up
XP_012843019	CDS_34406_Unigene_53373	CDS_24393_Unigene_39525	PREDICTED: uncharacterized protein LOC105963181	20.0832	205.944	10.2545	3.35819	0.0444515	Yes	0.639672	No	Up
XP_012843615	CDS_34008_Unigene_52843	CDS_30228_Unigene_47996	uncharacterized calcium-binding At1g02270	853.534	79.9675	0.0936898	-3.41596	0.0444878	Yes	0.639641	No	Down
EYU23310	CDS_10666_Unigene_19970	CDS_13514_Unigene_23584	hypothetical protein MIMGU_mgv1a005480mg	124.15	1194.04	9.61765	3.26568	0.0444905	Yes	0.639129	No	Up
XP_012848420	CDS_25301_Unigene_40410	CDS_1178_Unigene_2606	serine threonine- kinase PBS1-like	303.073	26.2907	0.086747	-3.52704	0.0445457	Yes	0.639371	No	Down
XP_015055205	CDS_3415_Unigene_7515	CDS_2504_Unigene_5189	PREDICTED: uncharacterized protein LOC107001746	45.6435	534.577	11.712	3.54992	0.0445528	Yes	0.638922	No	Up
XP_011098779	CDS_6825_Unigene_13693	CDS_137_Unigene_334	anthocyanidin 3-O-glucosyltransferase 2-like	25.5604	289.198	11.3143	3.50007	0.0446325	Yes	0.639516	No	Up
XP_011079379	CDS_5471_Unigene_11429	CDS_8351_Unigene_15467	pentatricopeptide repeat-containing At4g30700	608.885	52.5814	0.0863568	-3.53355	0.0446903	Yes	0.639792	No	Down
XP_011086490	CDS_8078_Unigene_15940	CDS_12839_Unigene_22570	PREDICTED: snakin-2-like	4630.99	643.026	0.138853	-2.84837	0.0447347	Yes	0.639879	No	Down
XP_011096067	CDS_26582_Unigene_42198	CDS_25668_Unigene_41308	calcium-dependent kinase-like	3761.03	508.287	0.135146	-2.88741	0.044736	Yes	0.639349	No	Down
XP_006493639	CDS_34451_Unigene_53425	CDS_1446_Unigene_3288	receptor kinase At3g47110	562.328	48.1996	0.0857143	-3.54432	0.044829	Yes	0.640129	No	Down
XP_011094663	CDS_2264_Unigene_5112	CDS_103_Unigene_240	PREDICTED: uncharacterized protein LOC105174308	1063.49	107.354	0.100944	-3.30837	0.0448875	Yes	0.640416	No	Down
XP_011071944	CDS_10415_Unigene_19628	CDS_17335_Unigene_29149	C2 and GRAM domain-containing At5g50170	52.0336	599.208	11.5158	3.52554	0.0449591	Yes	0.640888	No	Up
XP_011082583	CDS_8022_Unigene_15852	CDS_32431_Unigene_51045	sulfate transporter -like	236.434	1991.52	8.42317	3.07436	0.0449809	Yes	0.640651	No	Up
XP_012833229	CDS_10314_Unigene_19471	CDS_6617_Unigene_12749	PREDICTED: uncharacterized protein LOC105954105 isoform X1	41.9921	6.57267	0.156522	-2.67557	0.0450504	Yes	0.641093	No	Down
XP_011076751	CDS_39337_Unigene_61092	CDS_1425_Unigene_3249	probable carboxylesterase 18	746.728	67.9176	0.0909535	-3.45873	0.0452374	Yes	0.643205	No	Down
XP_011071108	CDS_8017_Unigene_15839	CDS_19187_Unigene_31756	signal recognition particle receptor subunit beta-like isoform X2	1958.11	232.234	0.118601	-3.07581	0.0453196	Yes	0.643824	No	Down
XP_012832240	CDS_15881_Unigene_27429	CDS_10341_Unigene_18643	PREDICTED: uncharacterized protein LOC105953150	74.8554	801.866	10.7122	3.42118	0.0454359	Yes	0.644927	No	Up
XP_006424799	CDS_3459_Unigene_7598	CDS_33127_Unigene_52646	hypothetical protein CICLE_v10027981mg	2355.21	18796.7	7.98093	2.99656	0.0456187	Yes	0.646971	No	Up
XP_012835499	CDS_16222_Unigene_27979	CDS_15906_Unigene_27141	glyoxylate hydroxypyruvate reductase HPR3	1195.86	125.976	0.105344	-3.24683	0.0456443	Yes	0.646783	No	Down
XP_011100975	CDS_7841_Unigene_15533	CDS_6521_Unigene_12604	auxilin 1	232.782	21.9089	0.0941176	-3.40939	0.0456482	Yes	0.646288	No	Down
XP_011073245	CDS_29082_Unigene_45644	CDS_14617_Unigene_25223	PREDICTED: uncharacterized protein LOC105158258	89.4614	12.0499	0.134694	-2.89224	0.0456626	Yes	0.645943	No	Down
XP_012838184	CDS_10209_Unigene_19310	CDS_1931_Unigene_4206	E3 SUMO- ligase SIZ1-like	326.808	28.4816	0.0871508	-3.52034	0.045793	Yes	0.647239	No	Down
XP_012841434	CDS_19611_Unigene_32592	CDS_29512_Unigene_46933	serine threonine- kinase BRI1-like 2	250.127	2068.2	8.26861	3.04765	0.0458197	Yes	0.647067	No	Up
XP_012856232	CDS_887_Unigene_2126	CDS_32268_Unigene_50854	B-box zinc finger 32	45.6435	525.814	11.52	3.52607	0.0458593	Yes	0.647079	No	Up
XP_011073672	CDS_11745_Unigene_21547	CDS_3255_Unigene_6530	pentatricopeptide repeat-containing At3g49740	180.748	18.6226	0.10303	-3.27886	0.0458904	Yes	0.646969	No	Down
XP_012856217	CDS_21177_Unigene_34763	CDS_22143_Unigene_36170	cfxQ homolog	750.38	69.013	0.0919708	-3.44268	0.0459707	Yes	0.647553	No	Down
XP_011071064	CDS_15285_Unigene_26552	CDS_3895_Unigene_7544	WAT1-related At1g70260	119.586	1141.45	9.54504	3.25475	0.0460649	Yes	0.648332	No	Up
XP_011082746	CDS_31404_Unigene_48983	CDS_24284_Unigene_39342	malate mitochondrial	427.224	3207.46	7.50769	2.90837	0.0460875	Yes	0.648103	No	Up
XP_011087248	CDS_1243_Unigene_2730	CDS_11660_Unigene_20851	chaperone dnaJ mitochondrial	2272.14	281.529	0.123905	-3.01269	0.0461432	Yes	0.648339	No	Down
XP_011079961	CDS_13229_Unigene_23633	CDS_14466_Unigene_25001	glycylpeptide N-tetradecanoyltransferase 1-like	325.895	2561.15	7.85882	2.97431	0.0461599	Yes	0.648028	No	Up
AII16854	CDS_39478_Unigene_61680	CDS_7241_Unigene_13760	ferredoxin	2854.55	371.356	0.130093	-2.94239	0.0461742	Yes	0.647682	No	Down
XP_011088632	CDS_20299_Unigene_33491	CDS_19625_Unigene_32377	PREDICTED: uncharacterized protein LOC105169809	162.491	17.5271	0.107865	-3.2127	0.0462588	Yes	0.648323	No	Down
XP_011085931	CDS_13250_Unigene_23666	CDS_18075_Unigene_30220	probable carboxylesterase 15 isoform X1	44.7307	512.668	11.4612	3.51869	0.0463743	Yes	0.649397	No	Up
XP_011074973	CDS_37906_Unigene_58070	CDS_32045_Unigene_50549	PREDICTED: dynamin-2B-like	530.378	3840.63	7.24131	2.85625	0.0464169	Yes	0.649447	No	Up
XP_011083989	CDS_9754_Unigene_18594	CDS_15105_Unigene_25985	formin 18 isoform X3	34.6891	398.742	11.4947	3.5229	0.046464	Yes	0.649561	No	Up
XP_012857346	CDS_10169_Unigene_19251	CDS_15896_Unigene_27124	TRANSPARENT TESTA 12-like	30.1247	341.779	11.3455	3.50404	0.0465444	Yes	0.650139	No	Up
XP_011075891	CDS_13712_Unigene_24313	CDS_4110_Unigene_7892	two-component response regulator-like APRR9	195.354	19.718	0.100935	-3.30851	0.0465608	Yes	0.649824	No	Down
XP_011090597	CDS_25344_Unigene_40475	CDS_14862_Unigene_25600	cytochrome P450 CYP736A12-like	21.9089	225.662	10.3	3.36457	0.0465872	Yes	0.649648	No	Up
XP_011097477	CDS_35371_Unigene_54729	CDS_24030_Unigene_38943	mechanosensitive ion channel chloroplastic-like	423.572	3170.22	7.48448	2.9039	0.0465964	Yes	0.649233	No	Up
XP_011094799	CDS_30875_Unigene_48265	CDS_312_Unigene_682	PREDICTED: uncharacterized protein LOC105174401 isoform X2	391.622	33.9588	0.0867133	-3.5276	0.0466231	Yes	0.649062	No	Down
AJD25185	CDS_2590_Unigene_5994	CDS_2777_Unigene_5571	cytochrome P450 CYP76S7	194.442	1674.94	8.61408	3.1067	0.0466501	Yes	0.648896	No	Up
XP_011085035	CDS_38706_Unigene_59656	CDS_34340_Unigene_55166	PREDICTED: protein ELC-like	58.4237	648.504	11.1	3.47249	0.0467579	Yes	0.649852	No	Up
XP_012837710	CDS_2734_Unigene_6297	CDS_4548_Unigene_8883	F-box LRR-repeat 3	79.4198	828.157	10.4276	3.38233	0.046765	Yes	0.64941	No	Up
XP_011070487	CDS_14839_Unigene_25961	CDS_25009_Unigene_40415	inactive leucine-rich repeat receptor-like serine threonine- kinase At1g60630	1602.09	184.035	0.114872	-3.1219	0.0467846	Yes	0.649141	No	Down
XP_011088411	CDS_14089_Unigene_24878	CDS_12946_Unigene_22732	PREDICTED: laccase-11-like	350.542	2704.65	7.71563	2.94778	0.046815	Yes	0.649022	No	Up
XP_012843836	CDS_23152_Unigene_37457	CDS_22125_Unigene_36144	DEAD-box ATP-dependent RNA helicase 31-like	859.924	83.2538	0.0968153	-3.36862	0.0468162	Yes	0.6485	No	Down
EYU23025	CDS_27106_Unigene_42916	CDS_27165_Unigene_43498	hypothetical protein MIMGU_mgv1a004312mg	1782.84	210.325	0.117972	-3.08348	0.0468193	Yes	0.648003	No	Down
XP_011091728	CDS_6078_Unigene_12411	CDS_376_Unigene_806	disease resistance RGA1	35.602	407.506	11.4462	3.51679	0.04684	Yes	0.647752	No	Up
XP_011095848	CDS_35198_Unigene_54474	CDS_30464_Unigene_48328	sodium hydrogen exchanger 6-like isoform X2	90.3742	912.506	10.097	3.33585	0.0469516	Yes	0.648757	No	Up
XP_011099696	CDS_21800_Unigene_35669	CDS_19753_Unigene_32545	PREDICTED: protein disulfide-isomerase-like	690.13	4839.68	7.0127	2.80997	0.0469769	Yes	0.648569	No	Up
XP_011091958	CDS_35090_Unigene_54315	CDS_29700_Unigene_47209	phototropin-2 isoform X1	3899.78	33664.1	8.6323	3.10975	0.0471419	Yes	0.650308	No	Up
XP_011076092	CDS_23727_Unigene_38221	CDS_6114_Unigene_11993	PREDICTED: uncharacterized protein LOC105160424	151.537	1364.92	9.00723	3.17108	0.0471513	Yes	0.6499	No	Up
XP_011098764	CDS_5625_Unigene_11686	CDS_7438_Unigene_14049	tetratricopeptide repeat 28-like	80.3326	831.443	10.35	3.37156	0.0472572	Yes	0.650821	No	Up
XP_012849178	CDS_16856_Unigene_28829	CDS_21966_Unigene_35926	PREDICTED: uncharacterized protein LOC105969004	740.338	69.013	0.0932182	-3.42324	0.0472813	Yes	0.650616	No	Down
XP_011073720	CDS_12350_Unigene_22422	CDS_14749_Unigene_25406	G3BP isoform X1	217.263	1820.63	8.37983	3.06692	0.0472958	Yes	0.650279	No	Up
XP_011101469	CDS_22858_Unigene_37092	CDS_14947_Unigene_25732	E3 ubiquitin- ligase UPL7	47.4693	535.673	11.2846	3.49629	0.0473095	Yes	0.64993	No	Up
XP_011093607	CDS_26052_Unigene_41442	CDS_8414_Unigene_15587	probable plastidic glucose transporter 2	76.6812	10.9545	0.142857	-2.80735	0.0474204	Yes	0.650918	No	Down
XP_012833863	CDS_11914_Unigene_21832	CDS_404_Unigene_854	disease resistance RPP13 3	628.968	4423.41	7.0328	2.8141	0.0474476	Yes	0.650754	No	Up
XP_011075979	CDS_11869_Unigene_21756	CDS_10761_Unigene_19356	basic leucine zipper 9-like	681.002	62.4404	0.091689	-3.44711	0.0476001	Yes	0.65231	No	Down
XP_011080468	CDS_18173_Unigene_30623	CDS_14555_Unigene_25135	PREDICTED: uncharacterized protein LOC105163723	150.624	1351.78	8.97455	3.16584	0.0476655	Yes	0.652669	No	Up
AFY63474	CDS_5099_Unigene_10788	CDS_5957_Unigene_11765	geraniol dehydrogenase	722.081	5019.33	6.9512	2.79726	0.0476674	Yes	0.65216	No	Up
XP_011071936	CDS_13703_Unigene_24294	CDS_22869_Unigene_37260	copper amine oxidase 1-like	104.98	1015.48	9.67304	3.27397	0.0477501	Yes	0.652754	No	Up
XP_008783310	CDS_27117_Unigene_42930	CDS_19424_Unigene_32082	DNA repair RAD51 homolog	868.14	85.4447	0.0984227	-3.34486	0.0478865	Yes	0.654082	No	Down
XP_012837232	CDS_22941_Unigene_37203	CDS_2313_Unigene_4876	lysine histidine transporter-like 8	2327.82	18032.1	7.74635	2.95352	0.0479043	Yes	0.65379	No	Up
XP_011097046	CDS_19882_Unigene_32976	CDS_17929_Unigene_30042	filament-like plant 3	3075.46	414.078	0.134639	-2.89283	0.0479566	Yes	0.653968	No	Down
XP_012838561	CDS_6649_Unigene_13368	CDS_3446_Unigene_6857	glucomannan 4-beta-mannosyltransferase 1-like	494.776	43.8178	0.0885609	-3.49719	0.0480386	Yes	0.654551	No	Down
XP_011085144	CDS_34339_Unigene_53282	CDS_27978_Unigene_44739	plasma membrane-associated cation-binding 1	11470.2	1579.63	0.137716	-2.86023	0.0481941	Yes	0.656133	No	Down
XP_011073104	CDS_8032_Unigene_15864	CDS_32349_Unigene_50939	PREDICTED: uncharacterized protein LOC105158158	136.931	1245.52	9.096	3.18523	0.0482252	Yes	0.65602	No	Up
ALO61894	CDS_35866_Unigene_55346	CDS_30329_Unigene_48117	mediator of RNA polymerase II transcription subunit 5a	588.802	4138.59	7.02884	2.81329	0.0482869	Yes	0.656324	No	Up
XP_011091406	CDS_4428_Unigene_9545	CDS_33888_Unigene_54311	uncharacterized aarF domain-containing kinase chloroplastic	1667.82	12200	7.31494	2.87085	0.0482933	Yes	0.655875	No	Up
XP_011093222	CDS_27134_Unigene_42955	CDS_14440_Unigene_24963	PREDICTED: uncharacterized protein LOC105173237	4534.23	651.79	0.143749	-2.79838	0.0483314	Yes	0.655859	No	Down
XP_012842056	CDS_20166_Unigene_33321	CDS_21874_Unigene_35769	asparagine--tRNA chloroplastic mitochondrial	213.612	1776.81	8.31795	3.05623	0.0484828	Yes	0.657378	No	Up
XP_012833231	CDS_10316_Unigene_19474	CDS_6616_Unigene_12749	PREDICTED: uncharacterized protein LOC105954105 isoform X3	10.0416	65.7267	6.54545	2.71049	0.0484931	Yes	0.656983	No	Up
XP_011073327	CDS_19226_Unigene_32069	CDS_13537_Unigene_23614	CBL-interacting serine threonine- kinase 5-like	190.79	1620.16	8.49187	3.08608	0.0486238	Yes	0.658219	No	Up
XP_012828463	CDS_2105_Unigene_4746	CDS_3981_Unigene_7693	15-cis-phytoene chloroplastic chromoplastic	2072.22	258.525	0.124758	-3.0028	0.0486593	Yes	0.658165	No	Down
XP_011074454	CDS_4541_Unigene_9765	CDS_6130_Unigene_12014	probable carboxylesterase 2	230.956	1888.55	8.17708	3.03158	0.0487219	Yes	0.658476	No	Up
XP_011100952	CDS_27876_Unigene_44079	CDS_22015_Unigene_35995	GATA transcription factor 5-like	4052.23	577.3	0.142465	-2.81133	0.0487437	Yes	0.658237	No	Down
XP_011092774	CDS_14878_Unigene_26008	CDS_21172_Unigene_34788	polyol transporter 5-like	1267.98	8896.11	7.01598	2.81065	0.0488309	Yes	0.658881	No	Up
XP_011078990	CDS_9083_Unigene_17585	CDS_34130_Unigene_54638	PREDICTED: uncharacterized protein LOC105162614	138.756	16.4317	0.118421	-3.078	0.0488459	Yes	0.65855	No	Down
XP_011080439	CDS_1684_Unigene_3887	CDS_26004_Unigene_41845	RNA polymerase II-associated factor 1 homolog	96.7643	944.274	9.75849	3.28666	0.0488584	Yes	0.658186	No	Up
AJD25177	CDS_29214_Unigene_45888	CDS_30541_Unigene_48437	cytochrome P450 CYP75B79	415.356	3057.39	7.36088	2.87988	0.0488939	Yes	0.658132	No	Up
KMS97068	CDS_24228_Unigene_38956	CDS_4032_Unigene_7777	hypothetical protein BVRB_7g179290	640.835	59.154	0.0923077	-3.43741	0.049103	Yes	0.660414	No	Down
XP_011094867	CDS_17284_Unigene_29426	CDS_18413_Unigene_30635	ribonuclease chloroplastic mitochondrial	170.707	1474.47	8.63743	3.1106	0.0491567	Yes	0.660603	No	Up
XP_011095955	CDS_18563_Unigene_31155	CDS_1261_Unigene_2890	tonoplast dicarboxylate transporter	627.142	4344.54	6.92751	2.79234	0.0491719	Yes	0.660275	No	Up
XP_011099369	CDS_5960_Unigene_12227	CDS_946_Unigene_2045	PREDICTED: uncharacterized protein LOC105177814	310.376	28.4816	0.0917647	-3.44592	0.0491959	Yes	0.660065	No	Down
XP_011080025	CDS_7828_Unigene_15499	CDS_740_Unigene_1671	1-aminocyclopropane-1-carboxylate oxidase homolog 1-like	17.3445	147.885	8.52632	3.09192	0.0492529	Yes	0.660298	No	Up
XP_011097003	CDS_40278_Unigene_63779	CDS_33555_Unigene_53523	PREDICTED: uncharacterized protein LOC105176028	16.4317	134.74	8.2	3.03562	0.049254	Yes	0.659782	No	Up
XP_011089848	CDS_33362_Unigene_51959	CDS_29941_Unigene_47595	PREDICTED: LOW QUALITY PROTEIN: phototropin-1	1561.92	11175.7	7.15511	2.83897	0.0493533	Yes	0.660582	No	Up
XP_011076095	CDS_12670_Unigene_22889	CDS_18277_Unigene_30479	probable fructose-bisphosphate aldolase chloroplastic	7321.22	1063.68	0.145287	-2.78302	0.049403	Yes	0.660716	No	Down
XP_011096202	CDS_39315_Unigene_61027	CDS_3647_Unigene_7173	F-box At1g61340-like	64.8138	686.844	10.5972	3.40561	0.0494554	Yes	0.660886	No	Up
XP_011082494	CDS_12697_Unigene_22926	CDS_15955_Unigene_27231	membrane-anchored ubiquitin-fold 3-like	1247.89	139.122	0.111485	-3.16508	0.0495361	Yes	0.661433	No	Down
CDP03602	CDS_15202_Unigene_26410	CDS_19608_Unigene_32351	unnamed protein product	1057.1	112.831	0.106736	-3.22788	0.0495928	Yes	0.661661	No	Down
XP_012853235	CDS_186_Unigene_432	CDS_704_Unigene_1600	PREDICTED: uncharacterized protein LOC105972803 isoform X2	863.576	5883.64	6.81311	2.76831	0.04965	Yes	0.661894	No	Up
XP_011088044	CDS_39434_Unigene_61629	CDS_32632_Unigene_51673	probable zinc metallopeptidase chloroplastic	649.051	4462.84	6.87595	2.78156	0.0496565	Yes	0.661451	No	Up
XP_011073829	CDS_695_Unigene_1661	CDS_3968_Unigene_7670	UDP-glycosyltransferase 92A1-like	54.7723	592.636	10.82	3.43563	0.0498589	Yes	0.663618	No	Up
EYU26741	CDS_13171_Unigene_23547	CDS_3473_Unigene_6893	hypothetical protein MIMGU_mgv1a022308mg, partial	1101.84	119.404	0.108368	-3.20599	0.0498753	Yes	0.663305	No	Down
XP_011072052	CDS_21432_Unigene_35166	CDS_32728_Unigene_51782	organic cation carnitine transporter 1 isoform X2	136.018	16.4317	0.120805	-3.04924	0.049951	Yes	0.663782	No	Down
XP_011085873	CDS_330_Unigene_707	CDS_2390_Unigene_5015	aspartic ase PCS1	242.824	1945.51	8.01203	3.00217	0.0499743	Yes	0.663563	No	Up
XP_011100771	CDS_16539_Unigene_28384	CDS_13118_Unigene_22997	F-box kelch-repeat At3g23880-like	102.242	974.946	9.53571	3.25334	0.0499782	Yes	0.663087	No	Up
XP_012848074	CDS_7697_Unigene_15270	CDS_6670_Unigene_12838	venom phosphodiesterase 2-like	22.8218	225.662	9.888	3.30568	0.0500209	No	0.663126	No	Up
XP_011078183	CDS_39004_Unigene_60369	CDS_1069_Unigene_2299	prefoldin subunit 1	1961.76	245.38	0.125081	-2.99906	0.0500799	No	0.663379	No	Down
XP_012847800	CDS_5325_Unigene_11204	CDS_810_Unigene_1849	PREDICTED: uncharacterized protein LOC105967730	746.728	72.2994	0.0968215	-3.36853	0.05012	No	0.663383	No	Down
XP_011087174	CDS_10710_Unigene_20032	CDS_8898_Unigene_16379	PREDICTED: alpha-N-acetylglucosaminidase-like	305.812	28.4816	0.0931343	-3.42454	0.0502016	No	0.663936	No	Down
XP_011097847	CDS_29884_Unigene_46793	CDS_26534_Unigene_42623	GDP-L-galactose phosphorylase 2-like	10861.3	126153	11.6148	3.5379	0.050435	No	0.666494	No	Up
XP_011082812	CDS_35243_Unigene_54551	CDS_30803_Unigene_48822	mitogen-activated kinase 19 isoform X2	176.184	1494.19	8.48083	3.08421	0.0505225	No	0.667121	No	Up
XP_011085132	CDS_13968_Unigene_24691	CDS_11157_Unigene_20008	DNA replication ATP-dependent helicase nuclease DNA2 isoform X1	944.821	98.5901	0.104348	-3.26053	0.0505544	No	0.667014	No	Down
XP_011100218	CDS_6166_Unigene_12554	CDS_11454_Unigene_20529	pentatricopeptide repeat-containing At3g58590	181.661	19.718	0.108543	-3.20367	0.0505721	No	0.66672	No	Down
XP_009618493	CDS_11671_Unigene_21424	CDS_33656_Unigene_53641	nicotinamide mononucleotide adenylyltransferase	639.923	60.2495	0.0941512	-3.40888	0.0507182	No	0.668117	No	Down
XP_011078413	CDS_3552_Unigene_7755	CDS_2244_Unigene_4748	heptahelical transmembrane 1	288.467	27.3861	0.0949367	-3.39689	0.0508887	No	0.669833	No	Down
XP_012842343	CDS_35065_Unigene_54297	CDS_28102_Unigene_44900	probable leucine-rich repeat receptor kinase At5g49770	167.055	1426.27	8.5377	3.09385	0.0509408	No	0.669991	No	Up
XP_012855315	CDS_12667_Unigene_22886	CDS_5448_Unigene_10736	GDSL esterase lipase At3g26430 isoform X2	647.225	61.3449	0.0947814	-3.39925	0.0510929	No	0.671461	No	Down
XP_011082942	CDS_1928_Unigene_4470	CDS_7193_Unigene_13703	HVA22 f	800.588	79.9675	0.099886	-3.32357	0.0510935	No	0.67094	No	Down
XP_011070079	CDS_5337_Unigene_11219	CDS_238_Unigene_497	WAT1-related At5g07050-like	485.647	3421.08	7.04436	2.81647	0.0511397	No	0.671017	No	Up
XP_011070110	CDS_7028_Unigene_14010	CDS_15284_Unigene_26264	NADH dehydrogenase [ubiquinone] 1 beta subcomplex subunit mitochondrial	3481.69	496.237	0.142528	-2.81069	0.051272	No	0.672224	No	Down
XP_011093578	CDS_14728_Unigene_25818	CDS_8012_Unigene_15001	pentatricopeptide repeat-containing At5g21222-like	593.366	4060.82	6.84369	2.77477	0.0513042	No	0.672118	No	Up
XP_011098483	CDS_38361_Unigene_58726	CDS_8477_Unigene_15683	farnesyltransferase subunit beta	2045.74	261.811	0.127979	-2.96603	0.0513568	No	0.672278	No	Down
XP_011099660	CDS_1743_Unigene_4098	CDS_1502_Unigene_3368	alcohol dehydrogenase 1B	1869.56	234.425	0.125391	-2.9955	0.0513792	No	0.672044	No	Down
EYU37132	CDS_19966_Unigene_33081	CDS_16233_Unigene_27626	hypothetical protein MIMGU_mgv1a009028mg	327.721	2458.18	7.50084	2.90705	0.0514085	No	0.671899	No	Up
XP_012847730	CDS_12881_Unigene_23143	CDS_32838_Unigene_51920	cell division topological specificity factor chloroplastic	240.085	1903.88	7.93004	2.98733	0.051431	No	0.671667	No	Up
XP_011095121	CDS_17118_Unigene_29216	CDS_11931_Unigene_21254	NRT1 PTR FAMILY	33.7762	362.592	10.7351	3.42427	0.0514378	No	0.67123	No	Up
AKN09579	CDS_8876_Unigene_17253	CDS_27877_Unigene_44581	basic helix-loop-helix transcription factor	300.335	28.4816	0.0948328	-3.39847	0.0514457	No	0.670807	No	Down
EYU44448	CDS_14957_Unigene_26101	CDS_13202_Unigene_23118	hypothetical protein MIMGU_mgv1a024322mg, partial	710.214	69.013	0.0971722	-3.36331	0.0514804	No	0.670734	No	Down
XP_012843634	CDS_4355_Unigene_9422	CDS_2372_Unigene_4975	MADS-box SOC1	314.028	29.577	0.094186	-3.40834	0.051494	No	0.670388	No	Down
XP_012827861	CDS_7794_Unigene_15434	CDS_2560_Unigene_5263	scarecrow 14	41.9921	452.419	10.7739	3.42947	0.0516872	No	0.672377	No	Up
XP_012849930	CDS_40077_Unigene_63083	CDS_5545_Unigene_10929	cytosolic sulfotransferase 14-like	427.224	39.436	0.0923077	-3.43741	0.0516997	No	0.672016	No	Down
XP_011071772	CDS_25087_Unigene_40147	CDS_6547_Unigene_12646	transcription factor MYB1R1	1569.23	189.512	0.120768	-3.04969	0.0517604	No	0.67228	No	Down
XP_011098545	CDS_38127_Unigene_58403	CDS_32140_Unigene_50696	paired amphipathic helix Sin3-like 2 isoform X2	245.562	1933.46	7.87361	2.97702	0.0517802	No	0.672014	No	Up
XP_011073141	CDS_190_Unigene_436	CDS_4384_Unigene_8556	potassium transporter 10-like isoform X1	61.1624	638.645	10.4418	3.3843	0.0518715	No	0.672675	No	Up
XP_011071233	CDS_31994_Unigene_49861	CDS_5230_Unigene_10157	histidine kinase 3 isoform X1	1356.53	9287.18	6.8463	2.77532	0.0518756	No	0.672204	No	Up
XP_012829048	CDS_4651_Unigene_9949	CDS_9267_Unigene_16927	PREDICTED: uncharacterized protein LOC105950245 isoform X2	377.016	35.0542	0.0929782	-3.42696	0.0520112	No	0.673438	No	Down
XP_011082991	CDS_24976_Unigene_40020	CDS_21179_Unigene_34797	plasma membrane ATPase 1-like	250.127	1958.66	7.83066	2.96913	0.052026	No	0.673106	No	Up
XP_011085074	CDS_5818_Unigene_12000	CDS_1815_Unigene_3893	NRT1 PTR FAMILY -like	9.12871	55.8677	6.12	2.61353	0.0521175	No	0.673767	No	Up
XP_011070524	CDS_12445_Unigene_22574	CDS_16275_Unigene_27677	histidine kinase 4	201.744	1643.17	8.1448	3.02588	0.0521786	No	0.674035	No	Up
XP_011084147	CDS_11201_Unigene_20749	CDS_2167_Unigene_4616	kinesin KIN12B	62.9881	651.79	10.3478	3.37126	0.052319	No	0.675324	No	Up
XP_011077249	CDS_16263_Unigene_28034	CDS_19088_Unigene_31596	probable receptor kinase At5g47070	247.388	1935.65	7.82435	2.96797	0.0523688	No	0.675444	No	Up
ADN78309	CDS_11048_Unigene_20534	CDS_706_Unigene_1604	cinnamyl alcohol dehydrogenase	1233.29	8324.29	6.74967	2.75482	0.0524172	No	0.675545	No	Up
XP_011081838	CDS_26253_Unigene_41734	CDS_24676_Unigene_39943	serine threonine- kinase AFC3 isoform X1	76.6812	763.525	9.95714	3.31573	0.0524495	No	0.675439	No	Up
XP_011100520	CDS_38715_Unigene_59666	CDS_9164_Unigene_16802	cytochrome b561 and DOMON domain-containing At5g47530-like	10.9545	70.1085	6.4	2.67807	0.0525722	No	0.676496	No	Up
XP_011078577	CDS_16405_Unigene_28221	CDS_16649_Unigene_28195	E3 ubiquitin- ligase RING1-like	260.168	2013.43	7.73895	2.95214	0.0525731	No	0.675987	No	Up
XP_011092826	CDS_21549_Unigene_35354	CDS_27017_Unigene_43301	beta-galactosidase 3	4973.32	749.284	0.150661	-2.73062	0.0526493	No	0.676444	No	Down
XP_011071241	CDS_17530_Unigene_29746	CDS_13824_Unigene_24050	agamous-like MADS-box AGL27	2077.69	270.575	0.130228	-2.94088	0.0527322	No	0.676987	No	Down
XP_011072653	CDS_3752_Unigene_8159	CDS_3590_Unigene_7101	receptor kinase At1g72540	326.808	2425.32	7.42123	2.89166	0.0527638	No	0.676872	No	Up
XP_011097205	CDS_8574_Unigene_16766	CDS_14251_Unigene_24682	PREDICTED: uncharacterized protein LOC105176173	594.279	4014.81	6.75576	2.75612	0.0528592	No	0.677574	No	Up
XP_011098517	CDS_21609_Unigene_35440	CDS_10590_Unigene_19107	xyloglucan glycosyltransferase 4	200.832	1626.74	8.1	3.01792	0.05294	No	0.678088	No	Up
EYU29853	CDS_20922_Unigene_34358	CDS_18138_Unigene_30290	hypothetical protein MIMGU_mgv1a004772mg	1013.29	6719.46	6.63135	2.7293	0.0530187	No	0.678575	No	Up
XP_011073178	CDS_13915_Unigene_24623	CDS_16112_Unigene_27442	PREDICTED: macoilin-1	255.604	1977.28	7.73571	2.95153	0.0530199	No	0.678069	No	Up
XP_011087621	CDS_6130_Unigene_12497	CDS_33049_Unigene_52564	NRT1 PTR FAMILY -like	40.1663	426.128	10.6091	3.40723	0.05302	No	0.67755	No	Up
XP_011087448	CDS_27268_Unigene_43188	CDS_27000_Unigene_43263	terminal uridylyltransferase 7-like	1255.2	145.694	0.116073	-3.1069	0.0530734	No	0.677713	No	Down
XP_011081311	CDS_1609_Unigene_3639	CDS_4054_Unigene_7805	PREDICTED: uncharacterized protein LOC105164370	1449.64	174.176	0.120151	-3.05708	0.0530841	No	0.677331	No	Down
XP_011101970	CDS_31263_Unigene_48813	CDS_29269_Unigene_46571	formin 20	108.632	993.569	9.14622	3.19318	0.0531423	No	0.677555	No	Up
XP_011094478	CDS_17231_Unigene_29362	CDS_23287_Unigene_37880	phosphoglucan phosphatase amyloplastic	11745	1689.18	0.143821	-2.79765	0.0531517	No	0.677156	No	Down
XP_012856570	CDS_18668_Unigene_31278	CDS_1527_Unigene_3407	MMS19 nucleotide excision repair homolog	135.105	1177.6	8.71622	3.1237	0.0532678	No	0.678117	No	Up
KVI06590	CDS_14389_Unigene_25328	CDS_15493_Unigene_26557	Calcium calmodulin-dependent calcium-dependent kinase	767.724	77.7766	0.101308	-3.30318	0.0533128	No	0.678172	No	Down
KQL25626	CDS_10748_Unigene_20095	CDS_5285_Unigene_10318	hypothetical protein SETIT_032292mg, partial	8608.37	1282.77	0.149014	-2.74648	0.0533776	No	0.678478	No	Down
XP_011076229	CDS_10324_Unigene_19486	CDS_3063_Unigene_6081	BAG family molecular chaperone regulator 2	715.691	4730.13	6.60918	2.72447	0.0534104	No	0.678378	No	Up
XP_011072120	CDS_13738_Unigene_24352	CDS_12196_Unigene_21634	serine threonine- kinase ATM	34.6891	363.688	10.4842	3.39015	0.0534722	No	0.678645	No	Up
XP_011074435	CDS_13351_Unigene_23811	CDS_7261_Unigene_13784	abscisic acid 8 -hydroxylase 4-like	441.83	3099.01	7.01405	2.81025	0.0535522	No	0.679143	No	Up
XP_012828480	CDS_26290_Unigene_41780	CDS_5761_Unigene_11371	PREDICTED: protein RAE1-like	864.489	90.9219	0.105174	-3.24915	0.0535969	No	0.679193	No	Down
XP_012836416	CDS_32287_Unigene_50349	CDS_28346_Unigene_45247	probable ADP-ribosylation factor GTPase-activating AGD11	51.1208	533.482	10.4357	3.38346	0.0537028	No	0.680017	No	Up
XP_011072898	CDS_14537_Unigene_25563	CDS_11952_Unigene_21273	glycine-rich RNA-binding mitochondrial-like	1507.15	184.035	0.122108	-3.03377	0.0537446	No	0.68003	No	Down
XP_011075931	CDS_15776_Unigene_27282	CDS_5950_Unigene_11758	PREDICTED: uncharacterized protein LOC105160310	755.857	76.6812	0.101449	-3.30117	0.0538026	No	0.680247	No	Down
CAN83300	CDS_30550_Unigene_47769	CDS_3652_Unigene_7182	hypothetical protein VITISV_044100	101.329	14.2408	0.140541	-2.83094	0.0538324	No	0.680109	No	Down
XP_011101444	CDS_321_Unigene_690	CDS_5553_Unigene_10941	PREDICTED: uncharacterized protein LOC105179496	187.139	20.8135	0.11122	-3.16852	0.0538382	No	0.679666	No	Down
XP_011096998	CDS_24588_Unigene_39463	CDS_421_Unigene_894	serine protease chloroplastic-like isoform X2	343.239	32.8634	0.0957447	-3.38466	0.0538734	No	0.679596	No	Down
XP_011093224	CDS_35929_Unigene_55434	CDS_29546_Unigene_46975	PREDICTED: nucleolin	187.139	1521.57	8.13073	3.02339	0.054113	No	0.682102	No	Up
XP_012846049	CDS_39578_Unigene_61835	CDS_5842_Unigene_11534	MLP 423	81.2455	786.53	9.6809	3.27514	0.0542017	No	0.682704	No	Up
XP_012846344	CDS_11159_Unigene_20700	CDS_2081_Unigene_4459	NUCLEAR FUSION DEFECTIVE 4-like isoform X3	94.9386	887.311	9.34615	3.22437	0.0542332	No	0.682584	No	Up
XP_011081729	CDS_27744_Unigene_43872	CDS_17382_Unigene_29203	serine threonine- kinase Aurora-1	51.1208	530.195	10.3714	3.37454	0.0542798	No	0.682655	No	Up
XP_011072084	CDS_33641_Unigene_52328	CDS_26872_Unigene_43095	PREDICTED: uncharacterized protein LOC105157371	302.16	29.577	0.0978852	-3.35277	0.0542833	No	0.682184	No	Down
XP_011086395	CDS_37428_Unigene_57418	CDS_31777_Unigene_50186	PREDICTED: uncharacterized protein LOC105168145	209.047	1659.6	7.93886	2.98893	0.0544548	No	0.683824	No	Up
XP_011075142	CDS_2946_Unigene_6671	CDS_7779_Unigene_14663	PREDICTED: uncharacterized protein LOC105159683	1247.89	146.79	0.11763	-3.08767	0.0544695	No	0.683493	No	Down
XP_012840654	CDS_17448_Unigene_29654	CDS_15004_Unigene_25809	metalloendo ase 1-like	559.59	3760.66	6.72039	2.74855	0.054479	No	0.683099	No	Up
XP_012848364	CDS_25367_Unigene_40542	CDS_23176_Unigene_37686	meiotic recombination SPO11-1	112.283	15.3362	0.136585	-2.87213	0.0545853	No	0.683917	No	Down
XP_012828611	CDS_25627_Unigene_40824	CDS_22132_Unigene_36156	acyl- thioesterase 2-like	655.441	4320.44	6.59164	2.72064	0.0546042	No	0.683639	No	Up
XP_011090350	CDS_15971_Unigene_27559	CDS_17671_Unigene_29636	PREDICTED: uncharacterized protein LOC105171048	368.8	2643.31	7.16733	2.84144	0.0546067	No	0.683158	No	Up
XP_011077581	CDS_566_Unigene_1267	CDS_30379_Unigene_48195	PREDICTED: laccase-4-like	44.7307	464.469	10.3837	3.37625	0.0547888	No	0.684921	No	Up
XP_011079114	CDS_4622_Unigene_9890	CDS_14197_Unigene_24588	zinc finger chloroplastic isoform X2	96.7643	896.074	9.26038	3.21107	0.0548068	No	0.684634	No	Up
EYU36279	CDS_39845_Unigene_62675	CDS_8035_Unigene_15045	hypothetical protein MIMGU_mgv1a007802mg	4444.77	678.081	0.152557	-2.71258	0.0549507	No	0.685917	No	Down
XP_012832749	CDS_4305_Unigene_9345	CDS_7982_Unigene_14961	PREDICTED: syntaxin-31	1388.48	168.699	0.121499	-3.04098	0.0551646	No	0.688071	No	Down
XP_011095768	CDS_34356_Unigene_53303	CDS_30509_Unigene_48381	PREDICTED: uncharacterized protein LOC105175119	929.303	101.876	0.109627	-3.18933	0.0553957	No	0.690437	No	Down
XP_011099336	CDS_1066_Unigene_2406	CDS_272_Unigene_589	PREDICTED: uncharacterized protein LOC105177785	431.788	41.6269	0.0964059	-3.37473	0.0554158	No	0.690171	No	Down
XP_011085851	CDS_10145_Unigene_19221	CDS_6395_Unigene_12429	condensin complex subunit 3	827.061	87.6356	0.10596	-3.2384	0.0554412	No	0.689971	No	Down
XP_011076460	CDS_9195_Unigene_17766	CDS_8084_Unigene_15113	glutathione-specific gamma-glutamylcyclotransferase 2	2503.09	348.352	0.139168	-2.8451	0.0555455	No	0.690754	No	Down
XP_012830214	CDS_36699_Unigene_56457	CDS_29723_Unigene_47229	cation-chloride cotransporter 1	44.7307	460.087	10.2857	3.36257	0.0556513	No	0.691554	No	Up
XP_011082012	CDS_29013_Unigene_45547	CDS_21149_Unigene_34750	caffeoyl- O-methyltransferase-like	88.5485	830.347	9.37732	3.22918	0.0557	No	0.691643	No	Up
XP_011099569	CDS_929_Unigene_2191	CDS_394_Unigene_840	lysine histidine transporter-like 8	751.293	77.7766	0.103524	-3.27197	0.0557497	No	0.691744	No	Down
XP_011078159	CDS_20827_Unigene_34210	CDS_20475_Unigene_33714	pectinesterase-like isoform X1	2010.14	13964.7	6.94714	2.79642	0.0558063	No	0.691932	No	Up
XP_011079079	CDS_23025_Unigene_37308	CDS_24371_Unigene_39484	probable mediator of RNA polymerase II transcription subunit 26b	158.84	1312.34	8.26207	3.0465	0.0559667	No	0.693404	No	Up
XP_011074110	CDS_16640_Unigene_28519	CDS_11358_Unigene_20372	probable LRR receptor-like serine threonine- kinase At1g34110	253.778	26.2907	0.103597	-3.27094	0.0559896	No	0.693173	No	Down
XP_011070383	CDS_10798_Unigene_20178	CDS_9517_Unigene_17310	methionine gamma-lyase	478.344	3247.99	6.79008	2.76343	0.0561239	No	0.694319	No	Up
XP_011071312	CDS_11934_Unigene_21860	CDS_1194_Unigene_2661	PREDICTED: uncharacterized protein LOC105156792	4318.79	663.84	0.15371	-2.70172	0.0561483	No	0.694106	No	Down
XP_011083685	CDS_4307_Unigene_9348	CDS_2533_Unigene_5233	probable methyltransferase PMT28 isoform X1	132.366	1128.31	8.52414	3.09155	0.0564346	No	0.697128	No	Up
CDP06859	CDS_8304_Unigene_16283	CDS_25183_Unigene_40682	unnamed protein product	8369.2	1283.86	0.153403	-2.7046	0.056495	No	0.697358	No	Down
EPS61660	CDS_19329_Unigene_32212	CDS_14621_Unigene_25228	hypothetical protein M569_13135	845.318	5407.12	6.39654	2.67729	0.0566847	No	0.699181	No	Up
XP_011084101	CDS_7492_Unigene_14897	CDS_4640_Unigene_9025	blue copper -like	35.602	359.306	10.0923	3.33518	0.0567847	No	0.699897	No	Up
XP_011098337	CDS_14263_Unigene_25119	CDS_8637_Unigene_15950	PREDICTED: uncharacterized protein LOC105177021	401.663	39.436	0.0981818	-3.3484	0.0569901	No	0.701909	No	Down
ADX98505	CDS_15159_Unigene_26348	CDS_34356_Unigene_55185	late embryogenesis	2205.5	15348.3	6.95911	2.7989	0.0570194	No	0.701751	No	Up
XP_011091641	CDS_20058_Unigene_33204	CDS_10010_Unigene_18090	electron transfer flavo -ubiquinone mitochondrial	113.196	992.473	8.76774	3.13221	0.0571268	No	0.702554	No	Up
XP_011074667	CDS_18854_Unigene_31535	CDS_12982_Unigene_22790	endoglucanase 10-like	3105.59	457.896	0.147443	-2.76177	0.0572527	No	0.703583	No	Down
XP_012834628	CDS_21059_Unigene_34569	CDS_1914_Unigene_4158	PREDICTED: uncharacterized protein LOC105955450	238.259	1804.2	7.57241	2.92075	0.0573391	No	0.704126	No	Up
AGS47794	CDS_11928_Unigene_21851	CDS_10699_Unigene_19272	argonaute 7	421.746	41.6269	0.0987013	-3.34079	0.0575362	No	0.706026	No	Down
XP_011079918	CDS_20661_Unigene_33996	CDS_22004_Unigene_35973	heat stress transcription factor A-7a	1253.37	152.267	0.121486	-3.04114	0.0575482	No	0.705653	No	Down
XP_012830399	CDS_9368_Unigene_18046	CDS_7700_Unigene_14523	ribosomal RNA-processing 17	644.487	65.7267	0.101983	-3.2936	0.0575514	No	0.705173	No	Down
XP_011075703	CDS_40302_Unigene_63813	CDS_34432_Unigene_55289	G-type lectin S-receptor-like serine threonine- kinase At1g34300	556.851	3654.4	6.56262	2.71427	0.0576914	No	0.70637	No	Up
XP_011098409	CDS_4943_Unigene_10532	CDS_10636_Unigene_19177	PREDICTED: uncharacterized protein LOC105177084	1074.45	125.976	0.117247	-3.09237	0.0578221	No	0.70745	No	Down
XP_012827726	CDS_1500_Unigene_3241	CDS_2169_Unigene_4619	pentatricopeptide repeat-containing mitochondrial	43.8178	440.369	10.05	3.32912	0.0578278	No	0.707001	No	Up
XP_011089718	CDS_17084_Unigene_29167	CDS_12059_Unigene_21443	NHP2 1	4717.72	741.616	0.157198	-2.66934	0.0579069	No	0.707449	No	Down
XP_011096846	CDS_6511_Unigene_13103	CDS_13148_Unigene_23048	F-box FBD LRR-repeat At5g56420-like isoform X2	17.3445	128.167	7.38947	2.88547	0.05799	No	0.707946	No	Up
XP_011097252	CDS_40105_Unigene_63179	CDS_3752_Unigene_7331	PI-PLC X domain-containing At5g67130-like isoform X1	218.176	24.0998	0.11046	-3.1784	0.0580914	No	0.708664	No	Down
XP_009612736	CDS_17966_Unigene_30348	CDS_1094_Unigene_2365	heat shock factor HSF30 isoform X2	59.3366	9.85901	0.166154	-2.58941	0.0581827	No	0.709259	No	Down
XP_012855934	CDS_15742_Unigene_27226	CDS_6_Unigene_21	probable histone H2A variant 3	3121.11	464.469	0.148815	-2.7484	0.058203	No	0.708988	No	Down
XP_011092157	CDS_2720_Unigene_6277	CDS_17289_Unigene_29087	acyl- -binding domain-containing 4-like isoform X3	324.982	32.8634	0.101124	-3.30581	0.0582556	No	0.70911	No	Down
XP_011075042	CDS_15778_Unigene_27286	CDS_3339_Unigene_6680	patatin 7	877.269	5537.48	6.31217	2.65814	0.0583087	No	0.709238	No	Up
XP_011100835	CDS_14756_Unigene_25855	CDS_5096_Unigene_9879	zinc finger 6-like	360.584	36.1497	0.100253	-3.31828	0.0584249	No	0.710133	No	Down
XP_011085960	CDS_10610_Unigene_19888	CDS_11553_Unigene_20682	dr1-associated corepressor-like	2550.56	365.879	0.14345	-2.80138	0.058479	No	0.710273	No	Down
XP_011083582	CDS_20749_Unigene_34114	CDS_1103_Unigene_2389	kinesin KIF3A isoform X1	230.956	25.1952	0.109091	-3.1964	0.058515	No	0.710192	No	Down
XP_011076169	CDS_2903_Unigene_6582	CDS_32846_Unigene_51930	low-temperature-induced 65 kDa	772.289	4874.73	6.31206	2.65811	0.0585902	No	0.710587	No	Up
XP_011088327	CDS_8042_Unigene_15890	CDS_10801_Unigene_19411	PREDICTED: uncharacterized protein LOC105169600	188.051	21.9089	0.116505	-3.10154	0.0586346	No	0.710609	No	Down
XP_011091151	CDS_22242_Unigene_36303	CDS_12702_Unigene_22366	receptor-like serine threonine- kinase At2g45590	1067.15	125.976	0.11805	-3.08253	0.0586869	No	0.710726	No	Down
XP_012832887	CDS_11337_Unigene_20974	CDS_9158_Unigene_16793	probable indole-3-pyruvate monooxygenase YUCCA10	590.627	60.2495	0.102009	-3.29323	0.0588156	No	0.711767	No	Down
XP_011089290	CDS_26677_Unigene_42347	CDS_13429_Unigene_23458	GRAM domain-containing 1A	206.309	1584.01	7.67788	2.94071	0.0590232	No	0.713761	No	Up
XP_011075200	CDS_142_Unigene_373	CDS_3890_Unigene_7537	carboxyl-terminal-processing peptidase chloroplastic	513.946	3365.21	6.54778	2.71101	0.0595778	No	0.719945	No	Up
XP_011081743	CDS_38406_Unigene_58779	CDS_3888_Unigene_7534	amino acid permease 8-like isoform X2	496.602	50.3905	0.101471	-3.30087	0.0596898	No	0.720776	No	Down
Q6USK1	CDS_1791_Unigene_4235	CDS_24727_Unigene_40004	GERS_OCIBA ame: Full=Geraniol chloroplastic Short= Flags: Precursor	31.9505	306.725	9.6	3.26303	0.0597011	No	0.72039	No	Up
XP_011096915	CDS_15650_Unigene_27089	CDS_775_Unigene_1754	PREDICTED: LOW QUALITY PROTEIN: uncharacterized protein LOC105175967	366.974	37.2451	0.101493	-3.30055	0.0597031	No	0.719893	No	Down
XP_012836677	CDS_37721_Unigene_57841	CDS_5373_Unigene_10555	receptor 12	1180.34	144.599	0.122506	-3.02908	0.0598293	No	0.720893	No	Down
CDP14664	CDS_30319_Unigene_47451	CDS_28067_Unigene_44860	unnamed protein product	136.931	1127.21	8.232	3.04124	0.0599681	No	0.722043	No	Up
XP_011084065	CDS_10233_Unigene_19345	CDS_5653_Unigene_11152	calcium uptake mitochondrial-like	31.0376	294.675	9.49412	3.24703	0.0601145	No	0.723284	No	Up
XP_011079168	CDS_22627_Unigene_36775	CDS_11973_Unigene_21308	dehydrodolichyl diphosphate synthase 6	146.972	1191.84	8.10932	3.01958	0.060125	No	0.722888	No	Up
XP_012847932	CDS_8303_Unigene_16283	CDS_25185_Unigene_40682	5 -3 exoribonuclease 4-like	1501.67	194.989	0.129848	-2.9451	0.0601284	No	0.722408	No	Down
XP_011087612	CDS_18367_Unigene_30892	CDS_15520_Unigene_26574	squamous cell carcinoma antigen recognized by T-cells 3	257.43	1880.88	7.30638	2.86916	0.0602159	No	0.722938	No	Up
EYU21751	CDS_10068_Unigene_19074	CDS_2393_Unigene_5019	hypothetical protein MIMGU_mgv1a001232mg	104.067	15.3362	0.147368	-2.7625	0.0602647	No	0.723003	No	Down
XP_011081577	CDS_39973_Unigene_62864	CDS_34453_Unigene_55316	PREDICTED: uncharacterized protein At2g34160-like	1225.07	152.267	0.124292	-3.00819	0.060448	No	0.72468	No	Down
XP_011072452	CDS_3364_Unigene_7434	CDS_688_Unigene_1580	PREDICTED: protein CHUP1, chloroplastic	986.813	116.117	0.117669	-3.0872	0.0605722	No	0.725647	No	Down
XP_011078793	CDS_12531_Unigene_22697	CDS_8126_Unigene_15174	RRP5 homolog	354.194	2442.84	6.89691	2.78595	0.0605868	No	0.7253	No	Up
XP_012848857	CDS_20434_Unigene_33696	CDS_9306_Unigene_16985	oligopeptide transporter 5-like	57.5109	554.295	9.6381	3.26875	0.0606994	No	0.726127	No	Up
XP_011070556	CDS_7016_Unigene_13984	CDS_14427_Unigene_24945	MACPF domain-containing At1g14780	136.018	1114.07	8.1906	3.03397	0.060802	No	0.726832	No	Up
XP_012846616	CDS_16540_Unigene_28384	CDS_13120_Unigene_22998	F-box kelch-repeat At3g23880-like	130.541	1077.92	8.25734	3.04568	0.0608494	No	0.726878	No	Up
CDP14851	CDS_2222_Unigene_4999	CDS_1413_Unigene_3219	unnamed protein product	851.709	96.3992	0.113183	-3.14327	0.0609348	No	0.727376	No	Down
XP_011069760	CDS_27529_Unigene_43550	CDS_5167_Unigene_10012	PREDICTED: putative cyclin-A3-1	384.319	39.436	0.102613	-3.28472	0.061001	No	0.727645	No	Down
XP_011088891	CDS_18608_Unigene_31215	CDS_619_Unigene_1440	60S ribosomal L10a-1-like	7919.16	1265.24	0.159769	-2.64594	0.0610388	No	0.727575	No	Down
XP_006485660	CDS_19983_Unigene_33104	CDS_20856_Unigene_34273	serine threonine- kinase	539.507	55.8677	0.103553	-3.27155	0.061083	No	0.727582	No	Down
XP_011099438	CDS_32245_Unigene_50272	CDS_25447_Unigene_41047	probable starch synthase chloroplastic amyloplastic isoform X3	961.253	112.831	0.117379	-3.09075	0.0610863	No	0.727101	No	Down
XP_011088344	CDS_17368_Unigene_29542	CDS_12741_Unigene_22430	probable 1-acyl-sn-glycerol-3-phosphate acyltransferase 5	1387.56	178.558	0.128684	-2.95809	0.0611185	No	0.726966	No	Down
XP_011096858	CDS_32693_Unigene_50904	CDS_25217_Unigene_40729	probable splicing factor 3A subunit 1	827.061	5105.87	6.17351	2.62609	0.0611496	No	0.726817	No	Up
AJW67342	CDS_16185_Unigene_27912	CDS_14753_Unigene_25420	monoacylglycerol acyltransferase	169.794	1329.87	7.83226	2.96943	0.0611831	No	0.726696	No	Up
XP_011095850	CDS_39476_Unigene_61677	CDS_32286_Unigene_50868	ASPARTIC PROTEASE IN GUARD CELL 1-like	2337.86	15752.5	6.73799	2.75232	0.0612836	No	0.727372	No	Up
XP_012832868	CDS_19727_Unigene_32750	CDS_4451_Unigene_8702	mitochondrial substrate carrier family ucpB isoform X3	114.109	16.4317	0.144	-2.79586	0.0613258	No	0.727354	No	Down
XP_011095119	CDS_13006_Unigene_23320	CDS_8074_Unigene_15099	probable serine threonine- kinase WNK5 isoform X1	110.457	942.083	8.52893	3.09236	0.0613663	No	0.727317	No	Up
XP_011100548	CDS_12489_Unigene_22642	CDS_17962_Unigene_30097	aspartic ase nepenthesin-2-like	43.8178	423.937	9.675	3.27426	0.0614583	No	0.72789	No	Up
XP_011097256	CDS_19928_Unigene_33029	CDS_22325_Unigene_36409	RING finger 10	418.095	2790.1	6.67336	2.73841	0.06147	No	0.727512	No	Up
XP_011086238	CDS_4468_Unigene_9606	CDS_7094_Unigene_13554	inositol monophosphatase 3-like	2118.77	301.247	0.14218	-2.81421	0.0617256	No	0.730018	No	Down
XP_011101646	CDS_38843_Unigene_59848	CDS_34085_Unigene_54566	ATP-dependent RNA helicase DBP3	109.545	933.319	8.52	3.09085	0.0617479	No	0.729764	No	Up
XP_012831888	CDS_1793_Unigene_4238	CDS_1577_Unigene_3474	UDP-glycosyltransferase 73C1-like	335.024	35.0542	0.104632	-3.2566	0.0619059	No	0.731112	No	Down
XP_011083407	CDS_38320_Unigene_58655	CDS_9787_Unigene_17730	high mobility group B 9	654.528	70.1085	0.107113	-3.22279	0.0619613	No	0.731249	No	Down
XP_011073574	CDS_33497_Unigene_52118	CDS_6636_Unigene_12776	PREDICTED: protein DEK	867.227	99.6855	0.114947	-3.12095	0.0619748	No	0.730891	No	Down
CDO97874	CDS_8231_Unigene_16158	CDS_8170_Unigene_15236	unnamed protein product	1140.18	7036.04	6.17102	2.62551	0.0619866	No	0.730512	No	Up
XP_011101895	CDS_23574_Unigene_38063	CDS_22299_Unigene_36372	PREDICTED: uncharacterized protein LOC105179935 isoform X4	38.3406	366.974	9.57143	3.25873	0.0620072	No	0.730239	No	Up
XP_011069803	CDS_38230_Unigene_58540	CDS_2812_Unigene_5641	lecithin-cholesterol acyltransferase-like 1	182.574	1402.17	7.68	2.94111	0.0620127	No	0.729788	No	Up
BAG31951	CDS_7995_Unigene_15807	CDS_924_Unigene_2018	UGT73A7	129.628	1062.58	8.19718	3.03513	0.0620145	No	0.729294	No	Up
XP_011076978	CDS_10568_Unigene_19834	CDS_9278_Unigene_16942	PREDICTED: uncharacterized protein LOC105161098 isoform X1	304.899	2133.93	6.9988	2.80711	0.0620411	No	0.729092	No	Up
XP_011075575	CDS_11486_Unigene_21181	CDS_7059_Unigene_13510	PREDICTED: remorin	728.471	79.9675	0.109774	-3.18739	0.0620705	No	0.728924	No	Down
AJD25152	CDS_11428_Unigene_21109	CDS_2213_Unigene_4699	cytochrome P450 CYP71AP14	2707.58	405.315	0.149697	-2.73989	0.0621012	No	0.728771	No	Down
XP_012844322	CDS_15090_Unigene_26251	CDS_26016_Unigene_41868	probable sugar phosphate phosphate translocator At1g06470	125.063	1031.91	8.25109	3.04459	0.0621557	No	0.728896	No	Up
XP_007213385	CDS_38217_Unigene_58528	CDS_11542_Unigene_20670	hypothetical protein PRUPE_ppa026473mg	661.831	71.2039	0.107586	-3.21643	0.0621849	No	0.728726	No	Down
AFZ41794	CDS_1022_Unigene_2328	CDS_10643_Unigene_19190	cineole partial	205.396	24.0998	0.117333	-3.09132	0.0624357	No	0.731151	No	Down
XP_011097319	CDS_5837_Unigene_12033	CDS_34026_Unigene_54481	PREDICTED: uncharacterized protein LOC105176273	145.146	1158.98	7.98491	2.99728	0.0624677	No	0.731013	No	Up
XP_011081455	CDS_27514_Unigene_43535	CDS_11277_Unigene_20213	PREDICTED: protein ABIL4-like	20.996	164.317	7.82609	2.96829	0.0624701	No	0.730527	No	Up
XP_011092071	CDS_1505_Unigene_3252	CDS_33367_Unigene_53021	PREDICTED: histone H2A.1	3632.31	575.109	0.158331	-2.65898	0.0624835	No	0.730171	No	Down
XP_011098578	CDS_11918_Unigene_21835	CDS_19799_Unigene_32623	PREDICTED: uncharacterized protein LOC105177216	140.582	1129.4	8.03377	3.00608	0.0624877	No	0.729709	No	Up
XP_011089445	CDS_753_Unigene_1822	CDS_2415_Unigene_5055	histone H2A-like	1700.68	232.234	0.136554	-2.87246	0.0625725	No	0.730187	No	Down
KJB62399	CDS_36651_Unigene_56401	CDS_30563_Unigene_48473	hypothetical protein B456_009G415000	801.501	4893.35	6.10524	2.61005	0.062772	No	0.732003	No	Up
XP_011074041	CDS_21882_Unigene_35810	CDS_19396_Unigene_32037	PREDICTED: UPF0047 protein C4A8.02c	2169.89	313.297	0.144384	-2.79202	0.0629459	No	0.733517	No	Down
XP_011094929	CDS_8829_Unigene_17181	CDS_13180_Unigene_23088	PREDICTED: uncharacterized protein LOC105174502	20.996	163.221	7.77391	2.95864	0.0629586	No	0.733153	No	Up
XP_012854244	CDS_39144_Unigene_60725	CDS_6042_Unigene_11890	high mobility group B 6-like	3375.8	530.195	0.157058	-2.67063	0.0629707	No	0.732782	No	Down
XP_011079468	CDS_2624_Unigene_6053	CDS_1865_Unigene_4013	S-acyltransferase 18 isoform X3	567.806	60.2495	0.106109	-3.23638	0.063041	No	0.733089	No	Down
XP_011094091	CDS_33192_Unigene_51656	CDS_23358_Unigene_37995	PREDICTED: uncharacterized protein LOC105173886	256.517	28.4816	0.111032	-3.17095	0.0631444	No	0.733779	No	Down
EYU44607	CDS_40517_Unigene_64309	CDS_11517_Unigene_20626	hypothetical protein MIMGU_mgv11b021844mg	33.7762	314.393	9.30811	3.21849	0.0631765	No	0.73364	No	Up
XP_011076550	CDS_14625_Unigene_25683	CDS_16547_Unigene_28046	pentatricopeptide repeat-containing chloroplastic	189.877	1435.03	7.55769	2.91795	0.0632149	No	0.733574	No	Up
XP_011080889	CDS_1305_Unigene_2823	CDS_5425_Unigene_10686	MAR-binding filament 1-1	111.37	16.4317	0.147541	-2.76081	0.0632394	No	0.733348	No	Down
XP_011100422	CDS_8640_Unigene_16864	CDS_11327_Unigene_20305	PREDICTED: beta-amylase-like	39.2534	371.356	9.46047	3.24191	0.0632569	No	0.733041	No	Up
XP_011099269	CDS_29342_Unigene_46072	CDS_29394_Unigene_46750	BEL1-like homeodomain 4	160.665	1251	7.78636	2.96095	0.0633285	No	0.73336	No	Up
XP_011084969	CDS_21866_Unigene_35778	CDS_16276_Unigene_27678	proline transporter 3	851.709	5167.21	6.06688	2.60096	0.0633793	No	0.733439	No	Up
XP_011093343	CDS_2617_Unigene_6040	CDS_8160_Unigene_15219	GDSL esterase lipase At4g01130-like	317.679	33.9588	0.106897	-3.22571	0.0634192	No	0.733392	No	Down
XP_011073866	CDS_19592_Unigene_32571	CDS_17423_Unigene_29256	xylosyltransferase 1	77.594	701.085	9.03529	3.17557	0.063531	No	0.734175	No	Up
XP_011074777	CDS_13166_Unigene_23540	CDS_8724_Unigene_16086	maltose excess 1- chloroplastic	4499.54	737.235	0.163847	-2.60958	0.0635437	No	0.733813	No	Down
XP_011073085	CDS_23113_Unigene_37411	CDS_10125_Unigene_18273	thylakoid lumenal kDa chloroplastic	900.091	106.258	0.118053	-3.0825	0.0636319	No	0.734323	No	Down
XP_011101554	CDS_23621_Unigene_38124	CDS_13061_Unigene_22903	probable methionine--tRNA ligase	1153.87	145.694	0.126266	-2.98546	0.0636336	No	0.733834	No	Down
XP_012849560	CDS_37559_Unigene_57631	CDS_18938_Unigene_31414	phospholipid-transporting ATPase 8	53.8594	507.191	9.41695	3.23526	0.0636392	No	0.733391	No	Up
XP_011094022	CDS_11770_Unigene_21607	CDS_7450_Unigene_14063	PREDICTED: uncharacterized protein LOC105173837 isoform X1	38.3406	360.401	9.4	3.23266	0.0637	No	0.733584	No	Up
XP_011099301	CDS_3339_Unigene_7397	CDS_3802_Unigene_7397	PREDICTED: uncharacterized protein LOC105177754 isoform X2	476.519	50.3905	0.105747	-3.24131	0.0639354	No	0.735786	No	Down
XP_011094246	CDS_19826_Unigene_32883	CDS_11774_Unigene_21028	nuclear transcription factor Y subunit A-10	35.602	330.824	9.29231	3.21604	0.0640379	No	0.736458	No	Up
XP_011082559	CDS_20738_Unigene_34095	CDS_10339_Unigene_18637	ARM REPEAT PROTEIN INTERACTING WITH ABF2-like	890.049	105.163	0.118154	-3.08126	0.0640584	No	0.736186	No	Down
XP_011072468	CDS_28341_Unigene_44704	CDS_24410_Unigene_39548	PREDICTED: uncharacterized protein At1g51745	328.634	2239.09	6.81333	2.76836	0.0640622	No	0.735722	No	Up
XP_011080963	CDS_40554_Unigene_64503	CDS_1153_Unigene_2535	PREDICTED: uncharacterized protein LOC105164097 isoform X1	13.6931	83.2538	6.08	2.60407	0.06415	No	0.736223	No	Up
ABR92331	CDS_28538_Unigene_44987	CDS_10587_Unigene_19104	aldo keto reductase 1	26.4733	226.757	8.56552	3.09854	0.0642555	No	0.736926	No	Up
XP_011098935	CDS_10411_Unigene_19620	CDS_7134_Unigene_13616	PREDICTED: uncharacterized protein LOC105177466	513.946	54.7723	0.106572	-3.2301	0.0642986	No	0.736913	No	Down
XP_011095914	CDS_2273_Unigene_5146	CDS_2019_Unigene_4374	DNA ligase 1-like isoform X1	5690.84	945.369	0.166121	-2.58969	0.0644752	No	0.73843	No	Down
XP_012851713	CDS_38861_Unigene_59887	CDS_1465_Unigene_3314	PREDICTED: alpha-amylase	205.396	1516.1	7.38133	2.88388	0.0644967	No	0.738169	No	Up
XP_011101434	CDS_35219_Unigene_54512	CDS_30683_Unigene_48653	transport Sec61 subunit alpha-like	15088.8	2314.68	0.153403	-2.7046	0.0648046	No	0.741183	No	Down
XP_011071947	CDS_6769_Unigene_13598	CDS_8770_Unigene_16162	pentatricopeptide repeat-containing At1g08070-like	20.996	158.84	7.56522	2.91938	0.0649903	No	0.742797	No	Up
XP_012829724	CDS_26403_Unigene_41948	CDS_24310_Unigene_39380	potassium transporter 10	1066.23	6403.97	6.00616	2.58644	0.0650982	No	0.74352	No	Up
XP_011085803	CDS_24425_Unigene_39230	CDS_16409_Unigene_27851	PREDICTED: uncharacterized protein LOC105167697	839.841	98.5901	0.117391	-3.0906	0.0651044	No	0.743082	No	Down
XP_011082099	CDS_2850_Unigene_6477	CDS_32474_Unigene_51109	PREDICTED: uncharacterized protein LOC105164948	37.4277	345.065	9.21951	3.20469	0.0653249	No	0.745088	No	Up
XP_011071558	CDS_13541_Unigene_24074	CDS_7160_Unigene_13662	methyltransferase C9orf114 homolog isoform X2	270.21	1887.45	6.98514	2.80429	0.0653286	No	0.744621	No	Up
XP_012857545	CDS_13039_Unigene_23353	CDS_5556_Unigene_10950	pseudouridine-metabolizing bifunctional	63.901	584.968	9.15429	3.19445	0.065365	No	0.744527	No	Up
XP_011081398	CDS_20165_Unigene_33320	CDS_21873_Unigene_35769	asparagine--tRNA chloroplastic mitochondrial	693.782	77.7766	0.112105	-3.15707	0.0653694	No	0.744068	No	Down
XP_011079601	CDS_5832_Unigene_12019	CDS_2301_Unigene_4858	histone H1-like	1497.11	203.753	0.136098	-2.87729	0.0654757	No	0.744769	No	Down
XP_011085179	CDS_9632_Unigene_18411	CDS_973_Unigene_2082	reticuline oxidase	247.388	1752.71	7.08487	2.82474	0.0655435	No	0.745032	No	Up
XP_011077922	CDS_3326_Unigene_7371	CDS_1606_Unigene_3521	PREDICTED: uncharacterized protein LOC105161807	608.885	66.8222	0.109745	-3.18777	0.0656476	No	0.745707	No	Down
EYU39033	CDS_12635_Unigene_22840	CDS_5061_Unigene_9809	hypothetical protein MIMGU_mgv1a001909mg	376.103	40.5315	0.107767	-3.21401	0.0658419	No	0.747404	No	Down
XP_011099030	CDS_10142_Unigene_19216	CDS_17329_Unigene_29139	receptor kinase FERONIA	25.5604	211.421	8.27143	3.04814	0.0658573	No	0.74707	No	Up
XP_011098568	CDS_1327_Unigene_2861	CDS_12215_Unigene_21664	F-box At5g62060	78.5069	694.512	8.84651	3.14511	0.0659352	No	0.747445	No	Up
XP_011092099	CDS_24865_Unigene_39831	CDS_22599_Unigene_36830	riboflavin biosynthesis chloroplastic	760.421	87.6356	0.115246	-3.11721	0.0659729	No	0.747364	No	Down
XP_011075546	CDS_13091_Unigene_23438	CDS_10354_Unigene_18676	PREDICTED: uncharacterized protein LOC105160002	891.875	107.354	0.120368	-3.05447	0.0659822	No	0.746962	No	Down
XP_012832596	CDS_22670_Unigene_36825	CDS_17709_Unigene_29712	CSC1 At4g02900	209.047	25.1952	0.120524	-3.05261	0.0660067	No	0.746731	No	Down
XP_011076992	CDS_19429_Unigene_32347	CDS_9351_Unigene_17048	alpha-taxilin isoform X1	1257.02	165.412	0.13159	-2.92587	0.0660975	No	0.747251	No	Down
XP_011096218	CDS_8652_Unigene_16884	CDS_32203_Unigene_50780	PREDICTED: uncharacterized protein LOC105175466	125.976	1007.81	8	3	0.0661943	No	0.747838	No	Up
XP_011069815	CDS_3685_Unigene_7976	CDS_3594_Unigene_7105	histone-lysine N-methyltransferase ASHR3	307.638	33.9588	0.110386	-3.17937	0.066311	No	0.74865	No	Down
EYU35582	CDS_25539_Unigene_40727	CDS_22340_Unigene_36431	hypothetical protein MIMGU_mgv1a000247mg	38.3406	350.542	9.14286	3.19265	0.0663597	No	0.748692	No	Up
XP_011087940	CDS_14018_Unigene_24761	CDS_6323_Unigene_12324	transcription initiation factor TFIID subunit 1 isoform X2	276.6	1910.46	6.90693	2.78804	0.0663795	No	0.748408	No	Up
XP_012841085	CDS_34578_Unigene_53660	CDS_25880_Unigene_41675	transmembrane 9 superfamily member 12-like	1694.29	10430.8	6.15647	2.6221	0.0664018	No	0.748154	No	Up
XP_011075796	CDS_32897_Unigene_51210	CDS_5462_Unigene_10766	ATPase family AAA domain-containing 3-B-like	586.976	64.6313	0.110109	-3.183	0.0664889	No	0.748629	No	Down
AJD25247	CDS_10602_Unigene_19880	CDS_9027_Unigene_16611	cytochrome P450 CYP714G14	3861.44	26824.2	6.94667	2.79632	0.066534	No	0.748631	No	Up
XP_011098671	CDS_4283_Unigene_9319	CDS_10841_Unigene_19455	PREDICTED: uncharacterized protein LOC105177282	306.725	33.9588	0.110714	-3.17509	0.066583	No	0.748676	No	Down
XP_011083562	CDS_16329_Unigene_28121	CDS_4760_Unigene_9245	BRCA1-A complex subunit BRE	150.624	1158.98	7.69455	2.94384	0.0665867	No	0.748214	No	Up
XP_011086356	CDS_7685_Unigene_15228	CDS_16118_Unigene_27448	TELO2-interacting 1 homolog isoform X4	20.996	155.553	7.4087	2.88922	0.0666011	No	0.747871	No	Up
XP_012848439	CDS_10225_Unigene_19328	CDS_23520_Unigene_38209	G-type lectin S-receptor-like serine threonine- kinase At4g27290	56.598	517.05	9.13548	3.19148	0.0666531	No	0.747951	No	Up
XP_011074596	CDS_2162_Unigene_4876	CDS_2913_Unigene_5827	PREDICTED: uncharacterized protein LOC105159283	33.7762	302.343	8.95135	3.16211	0.0666798	No	0.747747	No	Up
XP_011070609	CDS_30133_Unigene_47188	CDS_26031_Unigene_41888	DELLA GAI1	399.837	2592.92	6.48493	2.69709	0.0667136	No	0.747623	No	Up
XP_011077134	CDS_6543_Unigene_13157	CDS_7862_Unigene_14787	PREDICTED: uncharacterized protein LOC105161213	1075.36	6382.06	5.9348	2.5692	0.0667257	No	0.747256	No	Up
XP_011073161	CDS_22347_Unigene_36430	CDS_20391_Unigene_33586	SHOOT GRAVITROPISM 5-like	104.98	866.497	8.25391	3.04508	0.0673562	No	0.75381	No	Up
XP_011082983	CDS_15623_Unigene_27048	CDS_22032_Unigene_36020	PREDICTED: uncharacterized protein LOC105165614	3897.05	26908.5	6.90485	2.78761	0.0673694	No	0.753452	No	Up
XP_004134139	CDS_29948_Unigene_46885	CDS_23266_Unigene_37829	PREDICTED: uncharacterized protein LOC101206735	30.1247	259.62	8.61818	3.10738	0.0675111	No	0.75453	No	Up
XP_011073024	CDS_3612_Unigene_7847	CDS_31959_Unigene_50426	PREDICTED: uncharacterized protein LOC105158090 isoform X1	124.15	986.996	7.95	2.99095	0.0675301	No	0.754237	No	Up
XP_011075540	CDS_11139_Unigene_20660	CDS_7122_Unigene_13600	UDP-N-acetylglucosamine transferase subunit ALG13 homolog	810.629	96.3992	0.118919	-3.07195	0.0675411	No	0.753854	No	Down
XP_011098994	CDS_32636_Unigene_50830	CDS_23835_Unigene_38636	pentatricopeptide repeat-containing At3g46610-like	712.039	4237.18	5.95077	2.57308	0.0676259	No	0.754296	No	Up
XP_011093912	CDS_18004_Unigene_30406	CDS_17008_Unigene_28703	PREDICTED: uncharacterized protein LOC105173740	1551.88	216.898	0.139765	-2.83893	0.0676807	No	0.754402	No	Down
XP_011102309	CDS_23169_Unigene_37488	CDS_13637_Unigene_23776	PREDICTED: cyclin-A1-1	15.5188	95.3037	6.14118	2.61852	0.0679288	No	0.756662	No	Up
XP_011084189	CDS_1348_Unigene_2922	CDS_2263_Unigene_4792	PREDICTED: uncharacterized protein C17orf53	140.582	19.718	0.14026	-2.83383	0.0679479	No	0.756368	No	Down
XP_011098560	CDS_30936_Unigene_48348	CDS_20481_Unigene_33723	xylosyltransferase 1-like	216.35	1544.58	7.13924	2.83577	0.0679499	No	0.755886	No	Up
AEZ55670	CDS_10074_Unigene_19081	CDS_33434_Unigene_53387	4-hydroxy-3-methylbut-2-enyl diphosphate reductase 2	5235.31	38131.3	7.28349	2.86463	0.0680765	No	0.756789	No	Up
XP_011091957	CDS_1747_Unigene_4109	CDS_3630_Unigene_7150	PREDICTED: uncharacterized protein LOC105172276	104.98	16.4317	0.156522	-2.67557	0.0683401	No	0.759213	No	Down
XP_011096192	CDS_10994_Unigene_20460	CDS_15661_Unigene_26770	vesicle-associated 4-2	187.139	1366.02	7.29951	2.8678	0.0685285	No	0.760799	No	Up
XP_011093476	CDS_22277_Unigene_36354	CDS_2193_Unigene_4658	probable indole-3-acetic acid-amido synthetase isoform X2	460.087	2882.12	6.26429	2.64715	0.0686573	No	0.761721	No	Up
AJD25196	CDS_38685_Unigene_59632	CDS_2481_Unigene_5164	cytochrome P450 CYP81Q40	138.756	1068.06	7.69737	2.94437	0.068845	No	0.763295	No	Up
XP_011081392	CDS_6343_Unigene_12846	CDS_9451_Unigene_17201	kDa heat shock mitochondrial	25.5604	203.753	7.97143	2.99484	0.0688578	No	0.762929	No	Up
XP_011100856	CDS_27198_Unigene_43077	CDS_161_Unigene_374	probable phosphatase 2C 50	218.176	1545.67	7.08452	2.82467	0.0688688	No	0.762545	No	Up
XP_011072680	CDS_24457_Unigene_39277	CDS_5191_Unigene_10084	PREDICTED: uncharacterized protein LOC105157872	287.554	32.8634	0.114286	-3.12928	0.0689097	No	0.762491	No	Down
XP_012853239	CDS_6264_Unigene_12698	CDS_6649_Unigene_12794	histone H1-like	493.863	3053.01	6.18189	2.62805	0.0690235	No	0.763243	No	Up
XP_012856706	CDS_29008_Unigene_45542	CDS_23766_Unigene_38516	U5 small nuclear ribonucleo 40 kDa	1177.6	156.649	0.133023	-2.91025	0.0690377	No	0.762894	No	Down
XP_011080706	CDS_35317_Unigene_54652	CDS_29291_Unigene_46599	serine arginine repetitive matrix 1 isoform X4	548.635	3335.63	6.07987	2.60404	0.0691941	No	0.764116	No	Up
XP_011088630	CDS_2327_Unigene_5284	CDS_30502_Unigene_48374	PREDICTED: uncharacterized protein LOC105169807	624.404	71.2039	0.114035	-3.13245	0.0693364	No	0.76518	No	Down
XP_011086651	CDS_12559_Unigene_22728	CDS_24795_Unigene_40104	PREDICTED: uncharacterized protein LOC105168318	1174.86	156.649	0.133333	-2.90689	0.0693762	No	0.765112	No	Down
XP_012837469	CDS_40246_Unigene_63732	CDS_2573_Unigene_5282	50S ribosomal chloroplastic-like	433.614	2728.75	6.29305	2.65376	0.0693896	No	0.764754	No	Up
XP_011092105	CDS_12664_Unigene_22880	CDS_13891_Unigene_24131	probable phosphatase 2C 34	510.295	3130.78	6.13524	2.61712	0.0694404	No	0.764808	No	Up
XP_011099243	CDS_36973_Unigene_56812	CDS_4705_Unigene_9147	LRR receptor-like serine threonine- kinase FLS2	94.0257	15.3362	0.163107	-2.61611	0.0694451	No	0.764355	No	Down
XP_011072092	CDS_2340_Unigene_5308	CDS_2827_Unigene_5672	abietadienol abietadienal oxidase	12.7802	72.2994	5.65714	2.50007	0.069483	No	0.764267	No	Up
AJD25150	CDS_4033_Unigene_8805	CDS_5707_Unigene_11257	cytochrome P450 CYP71A59	99.5029	818.298	8.22385	3.03981	0.0694939	No	0.763882	No	Up
XP_011075244	CDS_11279_Unigene_20896	CDS_19458_Unigene_32127	jmjC domain-containing 7	28.299	233.33	8.24516	3.04355	0.0694991	No	0.763437	No	Up
XP_011100536	CDS_15820_Unigene_27344	CDS_10136_Unigene_18297	PREDICTED: LOW QUALITY PROTEIN: uncharacterized protein LOC105178703	747.641	88.7311	0.118681	-3.07484	0.0696271	No	0.764339	No	Down
XP_011102294	CDS_16574_Unigene_28438	CDS_7946_Unigene_14908	gamma-cadinene synthase- partial	622.578	71.2039	0.11437	-3.12823	0.0697085	No	0.764728	No	Down
XP_011094448	CDS_12344_Unigene_22414	CDS_2905_Unigene_5816	pentatricopeptide repeat-containing At5g03800	47.4693	423.937	8.93077	3.15878	0.0697948	No	0.765171	No	Up
XP_012851973	CDS_597_Unigene_1328	CDS_6119_Unigene_12003	molybdenum cofactor sulfurase	826.148	100.781	0.121989	-3.03518	0.0698049	No	0.764779	No	Down
XP_011091359	CDS_28512_Unigene_44949	CDS_26562_Unigene_42657	histone-lysine N-methyltransferase family member SUVH9-like	285.729	1913.74	6.69776	2.74368	0.0701827	No	0.768413	No	Up
XP_011091936	CDS_24487_Unigene_39306	CDS_30332_Unigene_48122	aspartic ase 2 isoform X1	122.325	957.419	7.82687	2.96843	0.0702663	No	0.768823	No	Up
XP_011099009	CDS_993_Unigene_2280	CDS_2344_Unigene_4936	threonylcarbamoyladenosine tRNA methylthiotransferase	368.8	2366.16	6.41584	2.68164	0.0703029	No	0.768719	No	Up
XP_011080586	CDS_36670_Unigene_56422	CDS_31043_Unigene_49129	auxilin-related 2-like	624.404	3700.41	5.92632	2.56714	0.0705029	No	0.7704	No	Up
XP_011091346	CDS_8821_Unigene_17176	CDS_3163_Unigene_6365	PREDICTED: uncharacterized protein LOC105171809	52.0336	461.182	8.86316	3.14782	0.070516	No	0.770039	No	Up
XP_011081682	CDS_12099_Unigene_22086	CDS_2042_Unigene_4405	auxin-responsive IAA14	22.8218	168.699	7.392	2.88596	0.070521	No	0.769588	No	Up
XP_011078267	CDS_13770_Unigene_24406	CDS_18846_Unigene_31264	PREDICTED: uncharacterized protein LOC105162061 isoform X1	2162.59	331.92	0.153482	-2.70385	0.0706422	No	0.770407	No	Down
XP_011082782	CDS_11471_Unigene_21162	CDS_11352_Unigene_20350	PREDICTED: uncharacterized protein LOC105165462	258.342	30.6725	0.118728	-3.07427	0.0707554	No	0.771137	No	Down
CAH59424	CDS_15412_Unigene_26760	CDS_308_Unigene_677	amino acid permease	26.4733	5.47723	0.206897	-2.27302	0.0707658	No	0.770746	No	Down
XP_011086417	CDS_14640_Unigene_25703	CDS_17062_Unigene_28793	PREDICTED: uncharacterized protein LOC105168160	1190.38	161.03	0.135276	-2.88602	0.0707671	No	0.770257	No	Down
XP_011079844	CDS_37382_Unigene_57347	CDS_31420_Unigene_49642	mitochondrial Rho GTPase 1	997.768	129.263	0.129552	-2.9484	0.0707877	No	0.769978	No	Down
XP_011091943	CDS_35765_Unigene_55217	CDS_7765_Unigene_14641	WVD2-like 1 isoform X2	304.899	2009.05	6.58922	2.72011	0.0710073	No	0.771863	No	Up
XP_011100962	CDS_19210_Unigene_32035	CDS_15987_Unigene_27276	SUPPRESSOR OF GENE SILENCING 3	444.568	2757.24	6.20205	2.63275	0.0710898	No	0.772256	No	Up
XP_011090485	CDS_10662_Unigene_19965	CDS_11228_Unigene_20121	PREDICTED: uncharacterized protein LOC105171158	38.3406	334.111	8.71429	3.12338	0.0711434	No	0.772334	No	Up
XP_002516111	CDS_33689_Unigene_52394	CDS_25020_Unigene_40434	DNA binding	796.936	97.4946	0.122337	-3.03107	0.0712173	No	0.772633	No	Down
XP_011099051	CDS_6471_Unigene_13054	CDS_24588_Unigene_39799	probable leucine-rich repeat receptor-like serine threonine- kinase At5g15730	345.978	39.436	0.113984	-3.13309	0.0713361	No	0.773418	No	Down
XP_011073122	CDS_40149_Unigene_63553	CDS_33513_Unigene_53471	probable pectinesterase 8	24.6475	187.321	7.6	2.926	0.0714575	No	0.774231	No	Up
XP_011090357	CDS_32068_Unigene_49984	CDS_15117_Unigene_25997	zinc finger WIP3	39.2534	341.779	8.70698	3.12217	0.0714991	No	0.774178	No	Up
XP_012850742	CDS_14522_Unigene_25534	CDS_11544_Unigene_20674	PREDICTED: uncharacterized protein LOC105970461 isoform X2	1360.18	190.607	0.140134	-2.83512	0.0715572	No	0.774305	No	Down
XP_011077384	CDS_13198_Unigene_23586	CDS_29212_Unigene_46488	60S ribosomal L4-1	2166.24	13219.8	6.10265	2.60944	0.0716165	No	0.774443	No	Up
XP_011074817	CDS_23872_Unigene_38451	CDS_21699_Unigene_35539	PREDICTED: uncharacterized protein LOC105159446	247.388	1682.6	6.80148	2.76585	0.0716888	No	0.774722	No	Up
XP_012853973	CDS_12936_Unigene_23222	CDS_12652_Unigene_22305	DNA annealing helicase and endonuclease ZRANB3	355.107	40.5315	0.114139	-3.13114	0.0717223	No	0.774583	No	Down
XP_011072610	CDS_37911_Unigene_58077	CDS_6301_Unigene_12290	chromatin modification-related eaf-1 isoform X2	1634.95	238.807	0.146064	-2.77533	0.0717492	No	0.774371	No	Down
XP_009616647	CDS_32688_Unigene_50898	CDS_24985_Unigene_40379	vacuolar-sorting receptor 6-like	26.4733	207.039	7.82069	2.9673	0.0717801	No	0.774203	No	Up
XP_011093009	CDS_7267_Unigene_14492	CDS_1140_Unigene_2503	homeobox-leucine zipper ATHB-12	40.1663	349.447	8.7	3.12102	0.071818	No	0.774111	No	Up
XP_011098417	CDS_6989_Unigene_13940	CDS_33236_Unigene_52793	nuclear pore complex GP210	352.368	2255.52	6.40104	2.67831	0.0718188	No	0.773619	No	Up
XP_011092515	CDS_35393_Unigene_54764	CDS_639_Unigene_1484	QWRF motif-containing 2-like	424.485	48.1996	0.113548	-3.13862	0.071823	No	0.773164	No	Down
XP_011080965	CDS_33698_Unigene_52406	CDS_12605_Unigene_22241	PREDICTED: uncharacterized protein LOC105164099	1016.03	133.644	0.131536	-2.92647	0.0720246	No	0.774834	No	Down
XP_011099274	CDS_5023_Unigene_10672	CDS_4456_Unigene_8710	DEAD-box ATP-dependent RNA helicase 10	1562.84	226.757	0.145093	-2.78495	0.0721408	No	0.775584	No	Down
XP_012838482	CDS_9903_Unigene_18806	CDS_16335_Unigene_27756	5-methyltetrahydropteroyltriglutamate--homocysteine methyltransferase 1-like	1720.76	255.239	0.148329	-2.75313	0.0723246	No	0.777058	No	Down
XP_011074709	CDS_17942_Unigene_30320	CDS_21958_Unigene_35910	zeaxanthin chloroplastic-like	55.6851	484.187	8.69508	3.1202	0.0724741	No	0.778162	No	Up
XP_011087899	CDS_2760_Unigene_6341	CDS_33845_Unigene_54257	PREDICTED: uncharacterized protein LOC105169238	2110.56	12732.4	6.0327	2.5928	0.0726347	No	0.779385	No	Up
XP_011081891	CDS_14815_Unigene_25933	CDS_3681_Unigene_7218	pentatricopeptide repeat-containing mitochondrial	15.5188	90.9219	5.85882	2.55061	0.0727624	No	0.780253	No	Up
XP_011075328	CDS_16079_Unigene_27717	CDS_3805_Unigene_7401	RRP12 isoform X1	166.143	1202.8	7.23956	2.8559	0.0729074	No	0.781304	No	Up
XP_011095676	CDS_1729_Unigene_4046	CDS_10058_Unigene_18165	NAC domain-containing 21 22-like	282.99	1862.26	6.58065	2.71823	0.0732231	No	0.784184	No	Up
XP_011085358	CDS_20367_Unigene_33590	CDS_20404_Unigene_33607	pentatricopeptide repeat-containing At1g73710	266.558	1769.14	6.63699	2.73053	0.0735038	No	0.786684	No	Up
XP_011096979	CDS_18950_Unigene_31649	CDS_24247_Unigene_39252	heterogeneous nuclear ribonucleo H2 isoform X1	97.6772	784.339	8.02991	3.00538	0.0735138	No	0.786286	No	Up
XP_011075923	CDS_4833_Unigene_10317	CDS_33026_Unigene_52521	PREDICTED: uncharacterized protein LOC105160301	261.081	1738.47	6.65874	2.73525	0.0735548	No	0.786221	No	Up
XP_011097382	CDS_1992_Unigene_4560	CDS_6729_Unigene_12929	NAC domain-containing 8-like	190.79	25.1952	0.132057	-2.92076	0.0736573	No	0.786811	No	Down
XP_011099945	CDS_31108_Unigene_48583	CDS_30403_Unigene_48255	PREDICTED: uncharacterized protein LOC105178220	1142.91	6459.84	5.65208	2.49878	0.0738819	No	0.788705	No	Up
XP_009624146	CDS_33095_Unigene_51512	CDS_16210_Unigene_27590	PREDICTED: L-arabinokinase-like	22.8218	162.126	7.104	2.82863	0.0739238	No	0.788647	No	Up
XP_011073987	CDS_22870_Unigene_37100	CDS_17553_Unigene_29451	ion channel CASTOR-like isoform X2	23.7346	171.985	7.24615	2.85722	0.0739757	No	0.788695	No	Up
EYU40178	CDS_15320_Unigene_26603	CDS_9058_Unigene_16653	hypothetical protein MIMGU_mgv1a027061mg, partial	17.3445	105.163	6.06316	2.60007	0.0741759	No	0.790325	No	Up
XP_012854342	CDS_15032_Unigene_26206	CDS_4856_Unigene_9453	UDP-glycosyltransferase 83A1-like	1173.95	6626.35	5.64448	2.49684	0.0742224	No	0.790314	No	Up
XP_007159730	CDS_5289_Unigene_11138	CDS_17316_Unigene_29125	hypothetical protein PHAVU_002G262500g	929.303	121.594	0.130845	-2.93407	0.0742694	No	0.79031	No	Down
XP_011097704	CDS_22139_Unigene_36172	CDS_34253_Unigene_55065	probable amino acid permease 7	1362.92	7749.18	5.68573	2.50735	0.0742773	No	0.78989	No	Up
XP_012832740	CDS_15135_Unigene_26318	CDS_13442_Unigene_23478	PREDICTED: uncharacterized protein LOC105953612	52.9465	453.514	8.56552	3.09854	0.0744644	No	0.791374	No	Up
XP_011077229	CDS_24895_Unigene_39884	CDS_17618_Unigene_29550	U4 U6 small nuclear ribonucleo Prp3-like	177.097	24.0998	0.136082	-2.87745	0.0744801	No	0.791037	No	Down
XP_012836921	CDS_4118_Unigene_8987	CDS_1692_Unigene_3656	scopoletin glucosyltransferase-like	99.5029	789.816	7.93761	2.98871	0.0746782	No	0.792635	No	Up
XP_011097210	CDS_1476_Unigene_3198	CDS_32752_Unigene_51814	anthocyanidin 3-O-glucosyltransferase 5-like	608.885	3527.33	5.7931	2.53434	0.0747645	No	0.793046	No	Up
XP_011070167	CDS_11237_Unigene_20816	CDS_8987_Unigene_16538	PREDICTED: uncharacterized protein LOC105155881	460.087	53.6768	0.116667	-3.09954	0.0747772	No	0.792676	No	Down
XP_011100951	CDS_24605_Unigene_39492	CDS_19978_Unigene_32940	cytochrome P450 84A1-like	818.845	104.067	0.12709	-2.97607	0.074857	No	0.793017	No	Down
XP_011083106	CDS_14502_Unigene_25509	CDS_11312_Unigene_20278	LRR receptor-like serine threonine- kinase RCH1	334.111	39.436	0.118033	-3.08274	0.0750213	No	0.794254	No	Down
XP_011080011	CDS_24268_Unigene_39023	CDS_10969_Unigene_19666	KH domain-containing At4g18375-like	1576.53	234.425	0.148697	-2.74955	0.0750972	No	0.794552	No	Down
XP_011077132	CDS_8229_Unigene_16155	CDS_13570_Unigene_23673	leucine-rich repeat receptor kinase PXL1	457.348	53.6768	0.117365	-3.09092	0.0755001	No	0.798308	No	Down
XP_012854165	CDS_15031_Unigene_26205	CDS_10922_Unigene_19591	UDP-glycosyltransferase 83A1-like	974.033	130.358	0.133833	-2.90149	0.0755018	No	0.79782	No	Down
AJD25172	CDS_15874_Unigene_27421	CDS_25431_Unigene_41030	cytochrome P450 CYP72A331	4714.07	843.493	0.178931	-2.48252	0.075575	No	0.798087	No	Down
XP_011089461	CDS_10022_Unigene_19005	CDS_4566_Unigene_8909	TRM32 isoform X2	193.529	1340.82	6.9283	2.7925	0.075586	No	0.797698	No	Up
XP_011072252	CDS_15009_Unigene_26172	CDS_9651_Unigene_17537	(6-4)DNA photolyase	672.786	82.1584	0.122117	-3.03367	0.0756255	No	0.79761	No	Down
XP_011075309	CDS_39120_Unigene_60693	CDS_2964_Unigene_5904	PREDICTED: uncharacterized protein LOC105159806	148.798	1080.11	7.2589	2.85975	0.0756441	No	0.797301	No	Up
XP_006435717	CDS_23861_Unigene_38432	CDS_4514_Unigene_8820	hypothetical protein CICLE_v10033070mg	419.921	49.295	0.117391	-3.0906	0.0756727	No	0.797099	No	Down
XP_011086143	CDS_29350_Unigene_46081	CDS_27608_Unigene_44195	PREDICTED: uncharacterized protein LOC105167945	253.778	1676.03	6.60432	2.72341	0.0756748	No	0.796617	No	Up
XP_011075663	CDS_32416_Unigene_50508	CDS_29249_Unigene_46547	magnesium transporter MRS2-5	89.4614	719.707	8.0449	3.00807	0.0757482	No	0.796886	No	Up
XP_011091752	CDS_11184_Unigene_20727	CDS_9639_Unigene_17522	PREDICTED: uncharacterized protein LOC105172113	42.9049	361.497	8.42553	3.07477	0.0758821	No	0.797791	No	Up
XP_011070639	CDS_1794_Unigene_4244	CDS_21035_Unigene_34593	1-phosphatidylinositol 3-phosphate 5-kinase	165.23	1174.32	7.10718	2.82928	0.0759021	No	0.797499	No	Up
XP_011101142	CDS_3121_Unigene_7001	CDS_584_Unigene_1350	vinorine synthase-like	11.8673	62.4404	5.26154	2.39548	0.0759333	No	0.797324	No	Up
XP_011101976	CDS_27686_Unigene_43774	CDS_27436_Unigene_43938	ethanolamine-phosphate cytidylyltransferase	1770.97	271.67	0.153402	-2.70461	0.0759998	No	0.797519	No	Down
EPS74382	CDS_26387_Unigene_41920	CDS_25956_Unigene_41772	hypothetical protein M569_00374	12315.5	2098.87	0.170425	-2.55279	0.0762087	No	0.799209	No	Down
AKV71966	CDS_18996_Unigene_31722	CDS_26523_Unigene_42607	telomere repeat-binding factor like-	1891.47	294.675	0.155792	-2.68231	0.076268	No	0.799327	No	Down
XP_011100003	CDS_3835_Unigene_8368	CDS_13616_Unigene_23745	mitochondrial uncoupling 5-like isoform X1	293.032	1879.78	6.41495	2.68144	0.0764212	No	0.80043	No	Up
XP_011086923	CDS_23942_Unigene_38552	CDS_15613_Unigene_26701	PREDICTED: uncharacterized protein LOC105168516 isoform X1	796.023	101.876	0.127982	-2.96599	0.0765945	No	0.80174	No	Down
XP_011079840	CDS_30829_Unigene_48199	CDS_25266_Unigene_40805	DNA repair helicase UVH6 isoform X2	133.279	982.614	7.3726	2.88217	0.076693	No	0.802267	No	Up
XP_011099678	CDS_27151_Unigene_42991	CDS_27301_Unigene_43733	ultraviolet-B receptor UVR8 isoform X2	899.178	4974.42	5.53218	2.46785	0.0767728	No	0.802599	No	Up
XP_011084206	CDS_10488_Unigene_19743	CDS_6405_Unigene_12438	DNA ligase 1-like	115.935	18.6226	0.16063	-2.63819	0.0767974	No	0.802353	No	Down
XP_011091433	CDS_1233_Unigene_2711	CDS_7917_Unigene_14869	receptor like kinase	207.222	1407.65	6.79295	2.76404	0.076835	No	0.802242	No	Up
AGP02119	CDS_12001_Unigene_21958	CDS_17223_Unigene_28978	4-coumarate: ligase	1983.67	313.297	0.157938	-2.66257	0.0768409	No	0.801801	No	Down
BAL15057	CDS_20152_Unigene_33309	CDS_25058_Unigene_40487	glutamate receptor	15.5188	87.6356	5.64706	2.4975	0.0768816	No	0.801724	No	Up
XP_011098427	CDS_11338_Unigene_20975	CDS_7581_Unigene_14299	denticleless homolog A isoform X1	241.911	30.6725	0.126792	-2.97946	0.0768877	No	0.801287	No	Down
AIU99508	CDS_20294_Unigene_33482	CDS_14243_Unigene_24674	Dihydrolipoamide Dehydrogenase	243.737	1608.11	6.59775	2.72197	0.0769843	No	0.801792	No	Up
XP_012841477	CDS_34193_Unigene_53061	CDS_27902_Unigene_44633	cyclin-T1-4-like isoform X3	248.301	1632.21	6.57353	2.71667	0.077062	No	0.8021	No	Up
XP_011083098	CDS_32932_Unigene_51247	CDS_8425_Unigene_15595	PREDICTED: uncharacterized protein LOC105165701 isoform X1	60.2495	502.809	8.34545	3.06099	0.0770716	No	0.801698	No	Up
XP_011097526	CDS_9966_Unigene_18921	CDS_1638_Unigene_3571	E3 ubiquitin- ligase RING1-like	123.238	921.269	7.47556	2.90218	0.07708	No	0.801286	No	Up
XP_011085983	CDS_33049_Unigene_51437	CDS_29767_Unigene_47283	exportin-7 isoform X1	853.534	111.735	0.130909	-2.93336	0.0771381	No	0.801389	No	Down
XP_011096210	CDS_7938_Unigene_15725	CDS_13037_Unigene_22863	PREDICTED: uncharacterized protein LOC105175464	2287.65	372.451	0.162809	-2.61875	0.0772543	No	0.802097	No	Down
XP_011075706	CDS_10820_Unigene_20207	CDS_4089_Unigene_7860	PREDICTED: uncharacterized protein At1g66480-like	58.4237	487.473	8.34375	3.0607	0.0772876	No	0.801944	No	Up
XP_011078818	CDS_2609_Unigene_6021	CDS_5633_Unigene_11114	trichome birefringence-like	1270.72	7049.19	5.54741	2.47182	0.0773205	No	0.801785	No	Up
XP_011077035	CDS_9544_Unigene_18291	CDS_4477_Unigene_8760	NADH dehydrogenase [ubiquinone] 1 alpha subcomplex subunit 8-B-like	1778.27	276.052	0.155236	-2.68746	0.0775195	No	0.803349	No	Down
XP_012849568	CDS_37766_Unigene_57897	CDS_31748_Unigene_50153	serine threonine- kinase BLUS1-like isoform X1	37.4277	305.629	8.16585	3.0296	0.0775818	No	0.803495	No	Up
EYU26931	CDS_40308_Unigene_63821	CDS_13968_Unigene_24241	hypothetical protein MIMGU_mgv1a009497mg	94.9386	744.903	7.84615	2.97199	0.0778314	No	0.805579	No	Up
XP_011081952	CDS_7957_Unigene_15753	CDS_4991_Unigene_9684	DNA cross-link repair SNM1	228.218	29.577	0.1296	-2.94786	0.0778315	No	0.80508	No	Down
XP_011078088	CDS_15638_Unigene_27075	CDS_13510_Unigene_23579	PREDICTED: uncharacterized protein LOC105161924 isoform X2	107.719	823.775	7.64746	2.93498	0.0779182	No	0.805477	No	Up
XP_011099949	CDS_10978_Unigene_20441	CDS_4183_Unigene_8074	DELLA GAI	5128.51	934.415	0.1822	-2.4564	0.0779683	No	0.805495	No	Down
XP_011089746	CDS_7479_Unigene_14875	CDS_2361_Unigene_4960	receptor 2	36.5148	295.77	8.1	3.01792	0.0779783	No	0.805099	No	Up
XP_011080035	CDS_35883_Unigene_55381	CDS_30624_Unigene_48562	geranylgeranyl transferase type-2 subunit alpha	174.358	1210.47	6.94241	2.79544	0.0781538	No	0.806412	No	Up
XP_011095071	CDS_35707_Unigene_55147	CDS_15867_Unigene_27092	MATE efflux family chloroplastic	704.736	88.7311	0.125907	-2.98957	0.0781558	No	0.805934	No	Down
XP_011100542	CDS_33791_Unigene_52549	CDS_8902_Unigene_16385	PREDICTED: uncharacterized protein LOC105178709	136.018	20.8135	0.15302	-2.70821	0.0781832	No	0.805717	No	Down
XP_011080369	CDS_20895_Unigene_34317	CDS_10597_Unigene_19114	zinc finger CCCH domain-containing 46-like	766.812	98.5901	0.128571	-2.95936	0.0783186	No	0.806614	No	Down
XP_012851695	CDS_35355_Unigene_54709	CDS_30050_Unigene_47760	PREDICTED: uncharacterized protein LOC105971389	667.309	83.2538	0.124761	-3.00277	0.0784112	No	0.807069	No	Down
XP_011086681	CDS_17392_Unigene_29583	CDS_21570_Unigene_35330	pentatricopeptide repeat-containing mitochondrial isoform X1	32.8634	257.43	7.83333	2.96963	0.0788445	No	0.811027	No	Up
XP_011078947	CDS_8850_Unigene_17219	CDS_8154_Unigene_15212	pentatricopeptide repeat-containing At5g66520-like	120.499	894.979	7.42727	2.89283	0.0788735	No	0.810825	No	Up
XP_011086441	CDS_12119_Unigene_22109	CDS_6106_Unigene_11983	transcription factor MYB1R1	2108.73	12136.4	5.75532	2.5249	0.0789271	No	0.810877	No	Up
CAK22426	CDS_8183_Unigene_16086	CDS_12759_Unigene_22453	heat shock 83	111.37	840.206	7.54426	2.91538	0.0789875	No	0.810996	No	Up
XP_011096864	CDS_4571_Unigene_9810	CDS_9012_Unigene_16583	homeobox ATH1 isoform X1	1103.66	156.649	0.141935	-2.81669	0.0790369	No	0.811004	No	Down
XP_011088241	CDS_4275_Unigene_9310	CDS_3343_Unigene_6686	probable folate-biopterin transporter 7	417.182	50.3905	0.120788	-3.04945	0.0791216	No	0.811374	No	Down
XP_011087500	CDS_12778_Unigene_23001	CDS_8736_Unigene_16103	probable Xaa-Pro aminopeptidase 3	182.574	1247.71	6.834	2.77273	0.0794289	No	0.814024	No	Up
XP_011071410	CDS_26740_Unigene_42423	CDS_681_Unigene_1569	leucine-rich repeat extensin 3	350.542	42.7224	0.121875	-3.03653	0.0794347	No	0.813584	No	Down
XP_011078618	CDS_5737_Unigene_11869	CDS_2818_Unigene_5649	PREDICTED: uncharacterized protein LOC105162307 isoform X2	235.521	30.6725	0.130233	-2.94084	0.0795131	No	0.813886	No	Down
XP_011083567	CDS_11949_Unigene_21889	CDS_4237_Unigene_8201	filament-like plant 7 isoform X2	145.146	21.9089	0.150943	-2.72792	0.0795304	No	0.813563	No	Down
XP_011085974	CDS_14751_Unigene_25846	CDS_3688_Unigene_7228	PREDICTED: uncharacterized protein LOC105167842	949.386	130.358	0.137308	-2.86452	0.0796229	No	0.81401	No	Down
XP_011099129	CDS_23495_Unigene_37941	CDS_16879_Unigene_28504	DNA-directed RNA polymerase II subunit 1	1556.44	8613.48	5.53408	2.46834	0.0796686	No	0.813978	No	Up
XP_011072350	CDS_35362_Unigene_54720	CDS_30011_Unigene_47700	PREDICTED: kinesin-13A-like	168.881	1167.74	6.91459	2.78964	0.0796928	No	0.813726	No	Up
XP_012855012	CDS_12671_Unigene_22890	CDS_4668_Unigene_9083	PREDICTED: uncharacterized protein LOC105974452	200.832	27.3861	0.136364	-2.87447	0.0799413	No	0.815763	No	Down
XP_011086713	CDS_4602_Unigene_9858	CDS_5931_Unigene_11737	myosin-14 isoform X2	1850.39	294.675	0.15925	-2.65063	0.079986	No	0.815721	No	Down
XP_011075501	CDS_22067_Unigene_36069	CDS_20384_Unigene_33581	PREDICTED: uncharacterized protein LOC105159964	81.2455	645.217	7.94157	2.98942	0.0800143	No	0.81551	No	Up
XP_011098710	CDS_20429_Unigene_33692	CDS_8511_Unigene_15743	PREDICTED: uncharacterized protein LOC105177304 isoform X1	288.467	36.1497	0.125316	-2.99635	0.0800502	No	0.815377	No	Down
XP_011098942	CDS_6203_Unigene_12605	CDS_3075_Unigene_6126	GEM 5	32.8634	254.143	7.73333	2.95109	0.0801513	No	0.815908	No	Up
XP_011072674	CDS_36052_Unigene_55559	CDS_30527_Unigene_48413	phosphoinositide phosphatase SAC2	754.031	4129.83	5.477	2.45339	0.0802934	No	0.816856	No	Up
XP_012844372	CDS_14307_Unigene_25198	CDS_8521_Unigene_15754	probable phytol kinase chloroplastic	1533.62	235.521	0.153571	-2.70302	0.0803038	No	0.816462	No	Down
BAA75514	CDS_33015_Unigene_51385	CDS_29704_Unigene_47217	MYC-GP	508.469	62.4404	0.122801	-3.02561	0.0804073	No	0.817017	No	Down
XP_010664190	CDS_3239_Unigene_7192	CDS_33837_Unigene_54242	E3 ubiquitin ligase BIG BROTHER-related isoform X2	356.933	43.8178	0.122762	-3.02606	0.0805041	No	0.817502	No	Down
XP_011096174	CDS_19081_Unigene_31868	CDS_11892_Unigene_21192	U-box domain-containing 8	113.196	842.397	7.44194	2.89568	0.0806535	No	0.81852	No	Up
XP_011088450	CDS_15015_Unigene_26177	CDS_22894_Unigene_37291	SNF2 domain-containing CLASSY 3-like	1465.16	223.471	0.152523	-2.7129	0.0806806	No	0.818297	No	Down
XP_011087535	CDS_37938_Unigene_58116	CDS_32027_Unigene_50519	FACT complex subunit SPT16-like	648.138	3599.63	5.5538	2.47348	0.0807306	No	0.818306	No	Up
XP_011100367	CDS_23501_Unigene_37952	CDS_2823_Unigene_5663	probable tyrosine- phosphatase At1g05000	286.641	36.1497	0.126115	-2.98719	0.0807351	No	0.817854	No	Down
XP_011078143	CDS_39426_Unigene_61620	CDS_32617_Unigene_51660	light-regulated -like	106234	12763	0.120141	-3.0572	0.0807853	No	0.817865	No	Down
EYU37992	CDS_29387_Unigene_46121	CDS_13854_Unigene_24085	hypothetical protein MIMGU_mgv1a000014mg	21.9089	141.312	6.45	2.6893	0.080805	No	0.817568	No	Up
EYU34788	CDS_18518_Unigene_31086	CDS_12306_Unigene_21827	hypothetical protein MIMGU_mgv1a000449mg	165.23	24.0998	0.145856	-2.77738	0.0809114	No	0.818148	No	Down
XP_011461042	CDS_21974_Unigene_35946	CDS_14086_Unigene_24403	autophagy-related 8C	6187.44	1146.93	0.185364	-2.43156	0.0811044	No	0.819602	No	Down
EYU42574	CDS_13739_Unigene_24353	CDS_12199_Unigene_21637	hypothetical protein MIMGU_mgv1a027036mg, partial	33.7762	260.716	7.71892	2.9484	0.0811504	No	0.81957	No	Up
XP_011094107	CDS_22112_Unigene_36130	CDS_6777_Unigene_13033	DNA ligase 4	274.774	35.0542	0.127575	-2.97059	0.0812626	No	0.820206	No	Down
XP_011071696	CDS_24417_Unigene_39212	CDS_24640_Unigene_39878	MADS-box transcription factor 25 isoform X2	2889.24	503.905	0.174408	-2.51947	0.0813227	No	0.820316	No	Down
XP_011074535	CDS_16027_Unigene_27631	CDS_14341_Unigene_24826	random slug 5	895.526	122.69	0.137003	-2.86772	0.0813361	No	0.819955	No	Down
XP_011093121	CDS_15529_Unigene_26920	CDS_10684_Unigene_19255	probable serine threonine- kinase At1g01540	863.576	117.213	0.135729	-2.88119	0.0813584	No	0.819683	No	Down
XP_012854531	CDS_16699_Unigene_28618	CDS_4833_Unigene_9404	3-hydroxyisobutyryl- hydrolase mitochondrial isoform X1	3774.72	686.844	0.181959	-2.45832	0.0814445	No	0.820055	No	Down
XP_011089593	CDS_10195_Unigene_19293	CDS_4767_Unigene_9251	pentatricopeptide repeat-containing chloroplastic	76.6812	14.2408	0.185714	-2.42884	0.0815535	No	0.820657	No	Down
XP_011089936	CDS_9797_Unigene_18659	CDS_8325_Unigene_15441	chromodomain-helicase-DNA-binding 1-like isoform X2	344.152	42.7224	0.124138	-3.00998	0.0815877	No	0.820506	No	Down
XP_011072436	CDS_32185_Unigene_50193	CDS_25571_Unigene_41196	lysM domain receptor-like kinase 3	478.344	59.154	0.123664	-3.0155	0.0816986	No	0.821125	No	Down
XP_011090619	CDS_6182_Unigene_12574	CDS_8405_Unigene_15572	pentatricopeptide repeat-containing At2g02150	56.598	456.801	8.07097	3.01274	0.0817117	No	0.820762	No	Up
XP_011090212	CDS_10944_Unigene_20385	CDS_28587_Unigene_45581	PREDICTED: uncharacterized protein LOC105170953	1011.46	143.503	0.141877	-2.81728	0.0818083	No	0.821237	No	Down
XP_011088736	CDS_16061_Unigene_27682	CDS_154_Unigene_363	PREDICTED: uncharacterized protein LOC105169880	725.732	3953.46	5.44755	2.44561	0.0819079	No	0.821742	No	Up
KHG01731	CDS_37910_Unigene_58076	CDS_29317_Unigene_46630	epidermal patterning factor 6	152.449	23.0043	0.150898	-2.72835	0.0819638	No	0.821808	No	Down
XP_011077240	CDS_34724_Unigene_53831	CDS_28649_Unigene_45679	dihydrolipoyllysine-residue acetyltransferase component 1 of pyruvate dehydrogenase mitochondrial	1244.24	185.13	0.148789	-2.74866	0.0819675	No	0.821351	No	Down
XP_011085577	CDS_36220_Unigene_55767	CDS_31515_Unigene_49793	DNA-directed RNA polymerase chloroplastic mitochondrial	361.497	44.9132	0.124242	-3.00877	0.0821336	No	0.82252	No	Down
XP_009793766	CDS_2366_Unigene_5418	CDS_33261_Unigene_52828	heavy metal-associated isoprenylated plant 26 isoform X2	1355.61	205.944	0.151919	-2.71862	0.082403	No	0.824722	No	Down
XP_011097338	CDS_30017_Unigene_47000	CDS_21512_Unigene_35250	cystinosin homolog isoform X2	151.537	23.0043	0.151807	-2.71969	0.0825565	No	0.825763	No	Down
XP_011089084	CDS_16910_Unigene_28926	CDS_11891_Unigene_21190	GPI transamidase component PIG-T	375.19	2231.42	5.94745	2.57227	0.0825901	No	0.825604	No	Up
XP_011077736	CDS_30659_Unigene_47951	CDS_28134_Unigene_44949	uncharacterized membrane At1g16860-like	3967.34	731.757	0.184445	-2.43873	0.0826705	No	0.825912	No	Down
XP_011096585	CDS_25504_Unigene_40690	CDS_24058_Unigene_38992	alkaline neutral invertase CINV2	3918.04	721.898	0.18425	-2.44027	0.0827296	No	0.826007	No	Down
EYU44333	CDS_37342_Unigene_57297	CDS_22587_Unigene_36812	hypothetical protein MIMGU_mgv1a000009mg	97.6772	738.33	7.55888	2.91817	0.082834	No	0.826554	No	Up
XP_011094167	CDS_34537_Unigene_53574	CDS_24319_Unigene_39391	PREDICTED: uncharacterized protein LOC105173941	534.942	3012.47	5.6314	2.49349	0.0829421	No	0.827138	No	Up
EYU26569	CDS_9800_Unigene_18664	CDS_3782_Unigene_7368	hypothetical protein MIMGU_mgv1a000365mg	4156.3	772.289	0.185812	-2.42809	0.0830833	No	0.828051	No	Down
XP_012848454	CDS_10223_Unigene_19326	CDS_2136_Unigene_4552	PREDICTED: uncharacterized protein LOC105968372	377.016	47.1041	0.124939	-3.0007	0.0831257	No	0.827978	No	Down
XP_012854221	CDS_29276_Unigene_45981	CDS_5439_Unigene_10723	probable polygalacturonase	193.529	1280.58	6.61698	2.72617	0.0831712	No	0.827936	No	Up
XP_011095802	CDS_38454_Unigene_58857	CDS_6956_Unigene_13346	O-linked-mannose beta-1,4-N-acetylglucosaminyltransferase 2-like	28.299	201.562	7.12258	2.8324	0.0832023	No	0.827751	No	Up
XP_011070462	CDS_12465_Unigene_22609	CDS_8567_Unigene_15830	transmembrane 53-B	219.089	1416.41	6.465	2.69265	0.0835384	No	0.830599	No	Up
EYU34801	CDS_29498_Unigene_46263	CDS_4095_Unigene_7868	hypothetical protein MIMGU_mgv1a023857mg	94.9386	717.517	7.55769	2.91795	0.0836924	No	0.831634	No	Up
XP_009792652	CDS_29871_Unigene_46777	CDS_30558_Unigene_48462	PREDICTED: uncharacterized protein LOC104239662	2096.86	11664.3	5.56273	2.47579	0.0837062	No	0.831275	No	Up
XP_011083558	CDS_5997_Unigene_12286	CDS_4840_Unigene_9415	transcriptional regulator ATRX homolog isoform X2	1085.4	158.84	0.146341	-2.77259	0.0837202	No	0.830919	No	Down
XP_011095686	CDS_13075_Unigene_23410	CDS_13220_Unigene_23142	PREDICTED: uncharacterized protein LOC105175063	561.416	3123.11	5.56293	2.47584	0.0839313	No	0.832519	No	Up
XP_012851266	CDS_39033_Unigene_60582	CDS_19491_Unigene_32179	peroxiredoxin chloroplastic	22547	3756.28	0.166598	-2.58556	0.0839683	No	0.832391	No	Down
XP_012834718	CDS_29595_Unigene_46398	CDS_21761_Unigene_35630	CDP-diacylglycerol--glycerol-3-phosphate 3-phosphatidyltransferase 2	124.15	888.406	7.15588	2.83913	0.0840311	No	0.832517	No	Up
XP_012829079	CDS_28028_Unigene_44274	CDS_20470_Unigene_33702	PREDICTED: uncharacterized protein LOC105950270 isoform X1	584.237	3228.28	5.52562	2.46614	0.0841518	No	0.833218	No	Up
XP_011087119	CDS_38664_Unigene_59601	CDS_33060_Unigene_52576	PREDICTED: uncharacterized protein LOC105168685	922	4876.92	5.2895	2.40313	0.0841671	No	0.832874	No	Up
NP_001291326	CDS_13830_Unigene_24481	CDS_10331_Unigene_18622	catalase isozyme 1	17283.4	151077	8.74118	3.12783	0.0841686	No	0.832395	No	Up
XP_011086228	CDS_28674_Unigene_45133	CDS_18527_Unigene_30818	phosphoribosylglycinamide chloroplastic-like isoform X2	148.798	1025.34	6.8908	2.78467	0.0842445	No	0.832652	No	Up
CDP01662	CDS_37267_Unigene_57206	CDS_31672_Unigene_50036	unnamed protein product	525.814	66.8222	0.127083	-2.97615	0.0845146	No	0.834826	No	Down
XP_011073989	CDS_1499_Unigene_3239	CDS_4855_Unigene_9447	PREDICTED: uncharacterized protein LOC105158809	25560.4	4204.32	0.164486	-2.60397	0.0845814	No	0.83499	No	Down
XP_011096746	CDS_3009_Unigene_6769	CDS_7061_Unigene_13512	PREDICTED: protein CHUP1, chloroplastic-like	501.166	63.5358	0.126776	-2.97965	0.0845991	No	0.834671	No	Down
XP_011087731	CDS_6272_Unigene_12714	CDS_5616_Unigene_11076	potassium channel AKT2 3	1959.93	10734.3	5.47685	2.45335	0.0847444	No	0.83561	No	Up
XP_011101018	CDS_14244_Unigene_25089	CDS_2204_Unigene_4678	trichome birefringence-like 23	1906.07	315.488	0.165517	-2.59495	0.0848272	No	0.835932	No	Down
AFK29285	CDS_215_Unigene_467	CDS_1725_Unigene_3709	solanesyl diphosphate synthase	2099.6	11584.3	5.51739	2.46399	0.0849485	No	0.836632	No	Up
XP_012834430	CDS_2826_Unigene_6427	CDS_3464_Unigene_6886	omega-hydroxypalmitate O-feruloyl transferase-like	285.729	37.2451	0.130351	-2.93952	0.0850604	No	0.83724	No	Down
XP_011096363	CDS_17719_Unigene_30035	CDS_2034_Unigene_4398	receptor kinase HSL1	366.061	2155.84	5.88928	2.55809	0.0850661	No	0.836802	No	Up
XP_011087985	CDS_34127_Unigene_52993	CDS_29662_Unigene_47142	heat shock 70 kDa mitochondrial	9445.48	1749.43	0.185213	-2.43274	0.0850704	No	0.83635	No	Down
XP_011072140	CDS_21561_Unigene_35369	CDS_2468_Unigene_5136	E3 ubiquitin- ligase BOI-like	169.794	1135.98	6.69032	2.74208	0.085088	No	0.836029	No	Up
XP_011097331	CDS_40379_Unigene_63940	CDS_16167_Unigene_27530	UPF0392 RCOM_0530710	67.5524	526.909	7.8	2.96347	0.0852639	No	0.837265	No	Up
XP_012828251	CDS_31245_Unigene_48783	CDS_25126_Unigene_40594	NRT1 PTR FAMILY -like	203.57	1318.92	6.47892	2.69575	0.0853423	No	0.837541	No	Up
XP_011095502	CDS_17181_Unigene_29304	CDS_21290_Unigene_34942	truncated FRIGIDA 1	199.919	1299.2	6.49863	2.70014	0.0853454	No	0.837078	No	Up
XP_011094140	CDS_32879_Unigene_51192	CDS_29739_Unigene_47253	exosome component 10	257.43	1602.64	6.22553	2.6382	0.0853858	No	0.836982	No	Up
AAK06838	CDS_26021_Unigene_41390	CDS_6271_Unigene_12240	AF328860_1glyoxalase I	197.18	1283.86	6.51111	2.7029	0.0854166	No	0.836792	No	Up
EYU27310	CDS_18921_Unigene_31615	CDS_8677_Unigene_16004	hypothetical protein MIMGU_mgv1a009437mg	84.897	646.313	7.6129	2.92845	0.0854409	No	0.836537	No	Up
XP_011075219	CDS_15448_Unigene_26804	CDS_6253_Unigene_12209	pentatricopeptide repeat-containing At5g52630	87.6356	663.84	7.575	2.92125	0.0854715	No	0.836346	No	Up
EYU45252	CDS_38028_Unigene_58249	CDS_18793_Unigene_31195	hypothetical protein MIMGU_mgv1a025840mg, partial	65.7267	512.668	7.8	2.96347	0.0854968	No	0.836103	No	Up
XP_012854445	CDS_17825_Unigene_30159	CDS_8666_Unigene_15987	rab s geranylgeranyltransferase component A	331.372	1977.28	5.96694	2.57699	0.0855448	No	0.836081	No	Up
XP_011084409	CDS_2774_Unigene_6355	CDS_673_Unigene_1554	pentatricopeptide repeat-containing At4g02750	621.665	81.0629	0.130396	-2.93902	0.0856272	No	0.836396	No	Down
XP_011071393	CDS_13675_Unigene_24252	CDS_6420_Unigene_12459	outer envelope pore 16- chloroplastic-like	38.3406	292.484	7.62857	2.93141	0.085644	No	0.83607	No	Up
XP_011084314	CDS_16392_Unigene_28206	CDS_4483_Unigene_8776	OTU domain-containing DDB_G0284757 isoform X1	31.9505	232.234	7.26857	2.86167	0.0857379	No	0.836497	No	Up
XP_011099507	CDS_10695_Unigene_20004	CDS_13743_Unigene_23919	PREDICTED: uncharacterized protein LOC105177910 isoform X3	41.9921	324.252	7.72174	2.94893	0.0858371	No	0.836975	No	Up
XP_011080780	CDS_35990_Unigene_55493	CDS_30478_Unigene_48342	ubiquitin-activating enzyme E1 1	240.085	1506.24	6.27376	2.64933	0.0861086	No	0.839131	No	Up
XP_012847508	CDS_30402_Unigene_47590	CDS_8689_Unigene_16019	pentatricopeptide repeat-containing mitochondrial	41.9921	323.156	7.69565	2.94404	0.0862488	No	0.840005	No	Up
EYU42196	CDS_9117_Unigene_17642	CDS_6359_Unigene_12384	hypothetical protein MIMGU_mgv1a017311mg	722.994	97.4946	0.134848	-2.89059	0.0862825	No	0.839843	No	Down
XP_012849873	CDS_30384_Unigene_47566	CDS_28072_Unigene_44862	ATP phosphoribosyltransferase chloroplastic-like	882.746	4621.68	5.23557	2.38835	0.0863145	No	0.839665	No	Up
XP_011076748	CDS_17005_Unigene_29044	CDS_25014_Unigene_40424	LIM domain-containing WLIM2b	2199.11	377.929	0.171856	-2.54073	0.0864756	No	0.84074	No	Down
XP_012841521	CDS_37038_Unigene_56917	CDS_30771_Unigene_48776	late blight resistance homolog R1B-16	188.051	27.3861	0.145631	-2.77961	0.0865887	No	0.841349	No	Down
XP_011081578	CDS_30594_Unigene_47837	CDS_22065_Unigene_36057	cellulose synthase A catalytic subunit 1 [UDP-forming]	3804.85	22454.4	5.90154	2.56109	0.086605	No	0.841017	No	Up
XP_011075226	CDS_554_Unigene_1253	CDS_4380_Unigene_8552	PREDICTED: uncharacterized protein LOC105159742	297.596	1796.53	6.03681	2.59379	0.0866071	No	0.840547	No	Up
XP_011095001	CDS_37680_Unigene_57789	CDS_31596_Unigene_49911	root UVB sensitive 5	115.022	19.718	0.171429	-2.54432	0.086615	No	0.840135	No	Down
XP_011084222	CDS_6668_Unigene_13405	CDS_5868_Unigene_11581	beta-D-glucosyl crocetin beta-1,6-glucosyltransferase-like isoform X1	135.105	21.9089	0.162162	-2.62449	0.0867127	No	0.840594	No	Down
XP_012844736	CDS_2257_Unigene_5081	CDS_34149_Unigene_54683	golgin subfamily A member 6 3	1747.23	288.102	0.16489	-2.60042	0.0868593	No	0.841525	No	Down
XP_011101289	CDS_13704_Unigene_24295	CDS_30764_Unigene_48771	copper amine oxidase 1-like	138.756	954.133	6.87632	2.78164	0.0870351	No	0.842738	No	Up
XP_011086609	CDS_36263_Unigene_55842	CDS_30885_Unigene_48933	cysteine-rich receptor kinase 3	74.8554	571.822	7.63902	2.93339	0.0872016	No	0.843861	No	Up
XP_011083605	CDS_18710_Unigene_31343	CDS_8185_Unigene_15254	pentatricopeptide repeat-containing mitochondrial	290.293	38.3406	0.132075	-2.92057	0.0872156	No	0.843506	No	Down
XP_011069396	CDS_22963_Unigene_37238	CDS_18088_Unigene_30239	PREDICTED: protein DEK-like	1182.17	6149.83	5.20216	2.37911	0.0872445	No	0.843296	No	Up
XP_012839844	CDS_32223_Unigene_50233	CDS_24303_Unigene_39366	transmembrane 184A-like	636.271	84.3493	0.132568	-2.91519	0.0873494	No	0.843821	No	Down
XP_012845076	CDS_25265_Unigene_40378	CDS_23057_Unigene_37520	MLO 4 isoform X1	1270.72	197.18	0.155172	-2.68806	0.0873956	No	0.843777	No	Down
KOM49528	CDS_36953_Unigene_56777	CDS_9906_Unigene_17927	hypothetical protein LR48_Vigan08g035500	134.192	21.9089	0.163265	-2.61471	0.0874306	No	0.843627	No	Down
XP_011093970	CDS_8820_Unigene_17174	CDS_26905_Unigene_43132	3-ketoacyl- synthase 19-like	304.899	1825.01	5.98563	2.5815	0.0874494	No	0.84332	No	Up
XP_011086722	CDS_10016_Unigene_18997	CDS_2524_Unigene_5218	ATP sulfurylase 2	1701.59	9025.37	5.30408	2.4071	0.0874533	No	0.84287	No	Up
XP_012073613	CDS_39240_Unigene_60887	CDS_4289_Unigene_8353	glucan endo-1,3-beta-glucosidase 12	14.6059	74.4903	5.1	2.3505	0.087528	No	0.843102	No	Up
XP_012841530	CDS_37040_Unigene_56920	CDS_2207_Unigene_4686	late blight resistance homolog R1A-3	336.849	43.8178	0.130081	-2.94251	0.0875627	No	0.842949	No	Down
XP_011085977	CDS_33592_Unigene_52250	CDS_30856_Unigene_48893	shaggy-related kinase eta isoform X1	1462.42	7661.54	5.23895	2.38928	0.0876231	No	0.843044	No	Up
XP_011097333	CDS_11024_Unigene_20498	CDS_6751_Unigene_12974	PREDICTED: uncharacterized protein LOC105176285	207.222	29.577	0.142731	-2.80863	0.0876824	No	0.843127	No	Down
XP_011074844	CDS_19637_Unigene_32631	CDS_20122_Unigene_33165	photosystem II 22 kDa chloroplastic	13130.7	103132	7.85423	2.97347	0.0876995	No	0.842805	No	Up
XP_011078962	CDS_21489_Unigene_35256	CDS_5100_Unigene_9888	PREDICTED: uncharacterized protein LOC105162592	372.451	48.1996	0.129412	-2.94996	0.0877398	No	0.842707	No	Down
XP_011089534	CDS_25428_Unigene_40605	CDS_17041_Unigene_28760	PREDICTED: myosin-14	426.311	2418.74	5.67366	2.50428	0.0877443	No	0.842265	No	Up
XP_011102114	CDS_9644_Unigene_18425	CDS_14357_Unigene_24852	cytosolic sulfotransferase 12-like	495.689	2750.66	5.54917	2.47227	0.0878017	No	0.84233	No	Up
XP_011082932	CDS_13466_Unigene_23950	CDS_1079_Unigene_2329	PREDICTED: uncharacterized protein LOC105165573	799.675	111.735	0.139726	-2.83933	0.0879034	No	0.84282	No	Down
XP_011091519	CDS_22256_Unigene_36333	CDS_14711_Unigene_25347	probable serine threonine- kinase NAK	397.099	2274.14	5.7269	2.51775	0.0879615	No	0.842893	No	Up
XP_011086674	CDS_20670_Unigene_34013	CDS_5548_Unigene_10933	PREDICTED: uncharacterized protein LOC105168328 isoform X1	1353.79	213.612	0.157788	-2.66394	0.0879792	No	0.842578	No	Down
XP_011081899	CDS_35580_Unigene_55000	CDS_31077_Unigene_49178	transcriptional corepressor LEUNIG	1336.44	6951.69	5.20164	2.37897	0.0880164	No	0.84245	No	Up
XP_011078313	CDS_16357_Unigene_28159	CDS_13542_Unigene_23620	rop guanine nucleotide exchange factor 9-like	544.071	71.2039	0.130872	-2.93377	0.0881037	No	0.842801	No	Down
XP_011084215	CDS_7434_Unigene_14792	CDS_8961_Unigene_16492	Werner Syndrome-like exonuclease isoform X2	95.8514	17.5271	0.182857	-2.45121	0.0881288	No	0.842558	No	Down
XP_011076241	CDS_20455_Unigene_33717	CDS_32783_Unigene_51850	post-GPI attachment to s factor 3	1069.88	5524.33	5.16348	2.36834	0.0882228	No	0.842973	No	Up
XP_011091802	CDS_26537_Unigene_42139	CDS_25459_Unigene_41056	pullulanase chloroplastic isoform X1	362.41	2099.97	5.79446	2.53467	0.0883813	No	0.844003	No	Up
XP_011100453	CDS_28791_Unigene_45290	CDS_10613_Unigene_19139	anthocyanidin 3-O-glucosyltransferase 2-like	487.473	63.5358	0.130337	-2.93968	0.0885048	No	0.844699	No	Down
XP_011099741	CDS_7297_Unigene_14548	CDS_4413_Unigene_8629	mitogen-activated kinase kinase kinase YODA-like	1956.28	10450.5	5.34204	2.41739	0.088571	No	0.844847	No	Up
XP_011099089	CDS_19420_Unigene_32336	CDS_894_Unigene_1975	proline dehydrogenase mitochondrial	560.503	3040.96	5.42541	2.43973	0.0887503	No	0.846073	No	Up
XP_011074275	CDS_2316_Unigene_5262	CDS_5072_Unigene_9827	serine threonine- kinase CTR1 isoform X2	12.7802	62.4404	4.88571	2.28857	0.0888611	No	0.846644	No	Up
XP_011079312	CDS_16009_Unigene_27611	CDS_3695_Unigene_7237	pectinesterase 1-like	1375.7	7124.78	5.17903	2.37268	0.0889928	No	0.847414	No	Up
XP_011094027	CDS_11769_Unigene_21606	CDS_7451_Unigene_14064	PREDICTED: uncharacterized protein LOC105173837 isoform X2	37.4277	276.052	7.37561	2.88276	0.0890206	No	0.847196	No	Up
XP_012853945	CDS_34938_Unigene_54105	CDS_29825_Unigene_47417	PREDICTED: uncharacterized protein LOC105973467	368.8	48.1996	0.130693	-2.93575	0.089033	No	0.84683	No	Down
KJB70131	CDS_8431_Unigene_16499	CDS_12117_Unigene_21510	hypothetical protein B456_011G059400, partial	11.8673	56.9631	4.8	2.26303	0.0890343	No	0.846359	No	Up
XP_015159728	CDS_7152_Unigene_14253	CDS_12188_Unigene_21624	probable L-type lectin-domain containing receptor kinase	29.2119	199.371	6.825	2.77083	0.0890433	No	0.845962	No	Up
XP_011089260	CDS_12369_Unigene_22446	CDS_3664_Unigene_7195	PREDICTED: uncharacterized protein LOC105170275	285.729	38.3406	0.134185	-2.8977	0.0890954	No	0.845975	No	Down
XP_011097705	CDS_22137_Unigene_36171	CDS_18686_Unigene_31032	probable amino acid permease 7	65.7267	13.1453	0.2	-2.32193	0.0891072	No	0.845605	No	Down
XP_011072338	CDS_39571_Unigene_61821	CDS_8753_Unigene_16129	transcription repressor OFP14	183.487	27.3861	0.149254	-2.74416	0.0892119	No	0.846117	No	Down
AKN09599	CDS_7216_Unigene_14389	CDS_4136_Unigene_7957	basic helix-loop-helix transcription factor	101.329	731.757	7.22162	2.85232	0.0892769	No	0.846252	No	Up
XP_012840084	CDS_11530_Unigene_21241	CDS_11124_Unigene_19954	probable inactive serine threonine- kinase lvsG isoform X1	162.491	25.1952	0.155056	-2.68914	0.0893362	No	0.846332	No	Down
XP_012841755	CDS_21917_Unigene_35869	CDS_15651_Unigene_26760	reactive Intermediate Deaminase chloroplastic	6296.07	1223.61	0.194345	-2.36331	0.089351	No	0.845992	No	Down
XP_011081198	CDS_34631_Unigene_53706	CDS_25175_Unigene_40669	elongation factor G- chloroplastic	8404.8	57379.4	6.82698	2.77125	0.0894255	No	0.846216	No	Up
XP_011081653	CDS_13972_Unigene_24696	CDS_27856_Unigene_44548	peptidyl-prolyl cis-trans isomerase CYP57	99.5029	719.707	7.23303	2.8546	0.0895633	No	0.847039	No	Up
XP_011090937	CDS_11063_Unigene_20555	CDS_17418_Unigene_29249	peptidyl-prolyl cis-trans isomerase CYP18-1	545.897	72.2994	0.132441	-2.91657	0.0897052	No	0.8479	No	Down
EYU40639	CDS_15035_Unigene_26213	CDS_28242_Unigene_45096	hypothetical protein MIMGU_mgv1a027041mg	10.9545	51.4859	4.7	2.23266	0.0897186	No	0.847546	No	Up
KVI00086	CDS_14037_Unigene_24782	CDS_16981_Unigene_28650	Ribosomal partial	8226.79	1581.82	0.192277	-2.37874	0.0897558	No	0.847417	No	Down
XP_012856497	CDS_1907_Unigene_4437	CDS_2386_Unigene_5006	D-3-phosphoglycerate dehydrogenase chloroplastic-like	1554.62	8070.14	5.19107	2.37603	0.0898308	No	0.847645	No	Up
XP_011071895	CDS_23203_Unigene_37539	CDS_18348_Unigene_30556	serine threonine phosphatase 2A 55 kDa regulatory subunit B beta isoform-like isoform X1	3813.97	730.662	0.191575	-2.38402	0.0898326	No	0.847182	No	Down
XP_011094319	CDS_4408_Unigene_9525	CDS_3877_Unigene_7515	F-box kelch-repeat At1g57790-like	1111.88	170.889	0.153695	-2.70186	0.090018	No	0.84845	No	Down
XP_012847250	CDS_11546_Unigene_21261	CDS_34347_Unigene_55171	ABC transporter G family member 14-like	24.6475	154.458	6.26667	2.6477	0.0901023	No	0.848765	No	Up
XP_011079551	CDS_9458_Unigene_18191	CDS_25397_Unigene_40985	PREDICTED: uncharacterized protein LOC105163042	762.247	3950.18	5.18228	2.37359	0.0903456	No	0.850576	No	Up
XP_011079770	CDS_2371_Unigene_5437	CDS_2202_Unigene_4675	histone H2AX-like	3155.79	590.445	0.187099	-2.41813	0.090348	No	0.850118	No	Down
XP_011074513	CDS_31571_Unigene_49220	CDS_19911_Unigene_32851	deSI At4g17486	1156.61	179.653	0.155328	-2.68661	0.0903607	No	0.849758	No	Down
XP_011099414	CDS_17877_Unigene_30231	CDS_32510_Unigene_51177	probable inactive receptor kinase At1g27190	116.847	816.107	6.98438	2.80413	0.0903838	No	0.849496	No	Up
XP_011096054	CDS_39180_Unigene_60782	CDS_1671_Unigene_3631	tyrosyl-DNA phosphodiesterase 2	481.083	63.5358	0.132068	-2.92064	0.0904115	No	0.849277	No	Down
XP_011100709	CDS_17472_Unigene_29681	CDS_23725_Unigene_38441	PREDICTED: uncharacterized protein LOC105178851	43.8178	327.538	7.475	2.90207	0.0905074	No	0.849699	No	Up
XP_011099221	CDS_38608_Unigene_59380	CDS_32375_Unigene_50966	PREDICTED: uncharacterized protein LOC105177681	26.4733	170.889	6.45517	2.69046	0.0905583	No	0.849698	No	Up
XP_011082189	CDS_31077_Unigene_48565	CDS_26809_Unigene_42987	F-box SKIP31-like isoform X1	1149.3	178.558	0.155361	-2.6863	0.090589	No	0.849508	No	Down
XP_011096621	CDS_10358_Unigene_19541	CDS_183_Unigene_415	PREDICTED: uncharacterized protein LOC105175754	240.998	1474.47	6.11818	2.6131	0.0906025	No	0.849156	No	Up
XP_011072169	CDS_20324_Unigene_33524	CDS_16923_Unigene_28564	F-box PP2-A12	581.499	3107.78	5.34443	2.41804	0.0907051	No	0.84964	No	Up
XP_011086444	CDS_22118_Unigene_36136	CDS_24227_Unigene_39234	N-alpha-acetyltransferase 50	398.012	52.5814	0.13211	-2.92019	0.090872	No	0.850725	No	Down
XP_011086188	CDS_14855_Unigene_25977	CDS_10018_Unigene_18105	ATP synthase gamma chloroplastic-like	1172.13	5971.27	5.09439	2.34891	0.0908737	No	0.850264	No	Up
CDP06782	CDS_31551_Unigene_49187	CDS_17091_Unigene_28845	unnamed protein product	3377.62	640.835	0.18973	-2.39798	0.0909682	No	0.85067	No	Down
XP_011095401	CDS_17459_Unigene_29665	CDS_33575_Unigene_53545	PREDICTED: uncharacterized protein LOC105174869	1603.91	267.289	0.166648	-2.58513	0.0911602	No	0.851988	No	Down
XP_011094531	CDS_4434_Unigene_9554	CDS_8712_Unigene_16060	probable carboxylesterase 15	385.232	2178.84	5.65592	2.49976	0.0912319	No	0.85218	No	Up
XP_011071499	CDS_35913_Unigene_55416	CDS_27210_Unigene_43586	PREDICTED: uncharacterized protein LOC105156929	2452.88	442.56	0.180424	-2.47053	0.0912984	No	0.852323	No	Down
XP_011091637	CDS_24888_Unigene_39869	CDS_17055_Unigene_28780	F-box SKIP16	726.645	3760.66	5.17538	2.37166	0.0915734	No	0.854412	No	Up
XP_012849866	CDS_1010_Unigene_2310	CDS_5601_Unigene_11039	serine threonine- kinase At5g23170	289.38	39.436	0.136278	-2.87538	0.0916046	No	0.854224	No	Down
XP_011100999	CDS_14550_Unigene_25573	CDS_19329_Unigene_31942	PREDICTED: laccase-14-like	1037.93	5258.14	5.06596	2.34084	0.0916063	No	0.853762	No	Up
XP_011097848	CDS_7997_Unigene_15810	CDS_19385_Unigene_32010	UPF0695 membrane -like	88.5485	644.122	7.27423	2.86279	0.0917815	No	0.854917	No	Up
XP_011092641	CDS_451_Unigene_989	CDS_12046_Unigene_21408	ubiquinol oxidase mitochondrial-like	449.132	2476.8	5.51463	2.46327	0.0917874	No	0.854495	No	Up
XP_011072075	CDS_17143_Unigene_29244	CDS_12493_Unigene_22079	GEM 6	523.075	70.1085	0.134031	-2.89936	0.0918122	No	0.854248	No	Down
XP_011075608	CDS_6939_Unigene_13842	CDS_3060_Unigene_6076	PREDICTED: kinesin-4	279.339	38.3406	0.137255	-2.86507	0.0918275	No	0.853914	No	Down
XP_011077080	CDS_23712_Unigene_38196	CDS_29837_Unigene_47426	violaxanthin de- chloroplastic	4811.74	949.751	0.197382	-2.34094	0.0918784	No	0.85391	No	Down
XP_011091407	CDS_1244_Unigene_2731	CDS_9645_Unigene_17528	pentatricopeptide repeat-containing chloroplastic	178.923	27.3861	0.153061	-2.70782	0.0919853	No	0.854428	No	Down
XP_011070684	CDS_23217_Unigene_37557	CDS_28191_Unigene_45039	PREDICTED: uncharacterized protein LOC105156285	692.869	3597.44	5.19209	2.37632	0.0919951	No	0.854043	No	Up
XP_011089982	CDS_9976_Unigene_18936	CDS_4765_Unigene_9249	elongation factor G- mitochondrial	5388.68	1066.96	0.198001	-2.33642	0.09224	No	0.855839	No	Down
XP_011097828	CDS_3283_Unigene_7281	CDS_34236_Unigene_55041	vacuolar sorting-associated VTA1 homolog	109.545	19.718	0.18	-2.47393	0.092251	No	0.855465	No	Down
XP_012831701	CDS_19313_Unigene_32196	CDS_18513_Unigene_30800	monoacylglycerol lipase ABHD6	113.196	786.53	6.94839	2.79668	0.0924107	No	0.856469	No	Up
XP_012851292	CDS_7417_Unigene_14770	CDS_9772_Unigene_17709	beta-amyrin 28-oxidase-like	94.0257	674.794	7.1767	2.84332	0.0925226	No	0.85703	No	Up
XP_011074087	CDS_23797_Unigene_38333	CDS_14128_Unigene_24466	probable serine threonine- kinase chloroplastic	228.218	1394.5	6.1104	2.61127	0.0925423	No	0.856736	No	Up
XP_011070061	CDS_5941_Unigene_12194	CDS_7003_Unigene_13421	E3 ubiquitin- ligase RING1-like	734.861	104.067	0.141615	-2.81995	0.0926136	No	0.85692	No	Down
XP_011088820	CDS_9262_Unigene_17884	CDS_9739_Unigene_17660	phospholipid:diacylglycerol acyltransferase 2	465.564	62.4404	0.134118	-2.89843	0.0927703	No	0.857894	No	Down
XP_012828367	CDS_8878_Unigene_17256	CDS_3136_Unigene_6286	separase isoform X3	286.641	39.436	0.13758	-2.86166	0.092785	No	0.857554	No	Down
XP_011093542	CDS_37499_Unigene_57541	CDS_4757_Unigene_9242	PREDICTED: dihydroflavonol-4-reductase-like	6064.2	1202.8	0.198344	-2.33392	0.0928974	No	0.858116	No	Down
XP_011097718	CDS_8049_Unigene_15896	CDS_9347_Unigene_17039	sufE chloroplastic	622.578	3260.04	5.23636	2.38857	0.0929643	No	0.858259	No	Up
XP_011099108	CDS_18653_Unigene_31259	CDS_19530_Unigene_32243	PREDICTED: uncharacterized protein LOC105177598	147.885	971.66	6.57037	2.71597	0.093028	No	0.858372	No	Up
XP_012856431	CDS_38568_Unigene_59146	CDS_25063_Unigene_40492	late blight resistance homolog R1A-10 isoform X2	56.598	420.651	7.43226	2.8938	0.0930293	No	0.857908	No	Up
AKN09541	CDS_34660_Unigene_53743	CDS_19163_Unigene_31711	basic helix-loop-helix transcription factor	39.2534	282.625	7.2	2.848	0.0931414	No	0.858467	No	Up
XP_011080954	CDS_22573_Unigene_36712	CDS_19653_Unigene_32404	probable S-adenosylmethionine carrier chloroplastic	800.588	116.117	0.14504	-2.78548	0.0931886	No	0.858427	No	Down
XP_011087701	CDS_30949_Unigene_48362	CDS_17656_Unigene_29609	EI24 homolog isoform X1	744.903	106.258	0.142647	-2.80948	0.0932248	No	0.858286	No	Down
XP_011086433	CDS_38998_Unigene_60316	CDS_34633_Unigene_55758	RALF-like 32	117.76	20.8135	0.176744	-2.50027	0.0932523	No	0.858065	No	Down
XP_011088564	CDS_39135_Unigene_60713	CDS_34073_Unigene_54553	PREDICTED: uncharacterized protein LOC105169758	7024.54	1389.02	0.197739	-2.33833	0.0932693	No	0.857748	No	Down
XP_011101165	CDS_15853_Unigene_27387	CDS_5157_Unigene_9974	peroxidase 66-like	179.836	1138.17	6.32893	2.66196	0.0932958	No	0.857519	No	Up
ABR92334	CDS_25970_Unigene_41294	CDS_15532_Unigene_26584	dienelactone hydrolase family	762.247	3889.93	5.10323	2.35141	0.0933888	No	0.8579	No	Up
XP_011092930	CDS_39614_Unigene_61898	CDS_32469_Unigene_51102	EXORDIUM-like 5	3313.72	636.454	0.192066	-2.38033	0.0936134	No	0.85949	No	Down
XP_011077649	CDS_4777_Unigene_10199	CDS_5222_Unigene_10141	transcription factor AS1	6553.5	1302.48	0.198746	-2.331	0.0937028	No	0.859837	No	Down
XP_011093357	CDS_29338_Unigene_46068	CDS_19409_Unigene_32054	common plant regulatory factor 1-like isoform X2	227.305	1381.36	6.07711	2.60339	0.0937073	No	0.859405	No	Up
XP_011083977	CDS_12775_Unigene_22996	CDS_9455_Unigene_17210	probable purine permease 5	2493.05	457.896	0.183669	-2.44482	0.093873	No	0.86045	No	Down
XP_011078845	CDS_18969_Unigene_31674	CDS_14901_Unigene_25671	squamosa promoter-binding 17	372.451	50.3905	0.135294	-2.88583	0.0940031	No	0.86117	No	Down
XP_011078169	CDS_30220_Unigene_47321	CDS_19165_Unigene_31713	PREDICTED: uncharacterized protein LOC105161979	557.764	2948.94	5.28707	2.40247	0.094049	No	0.861117	No	Up
XP_012837214	CDS_14563_Unigene_25592	CDS_32222_Unigene_50803	hippocampus abundant transcript 1	24.6475	148.981	6.04444	2.59561	0.0941487	No	0.861556	No	Up
XP_012839198	CDS_27401_Unigene_43364	CDS_25510_Unigene_41117	exocyst complex component EXO70B1	784.156	113.926	0.145285	-2.78304	0.0941658	No	0.861239	No	Down
XP_011082789	CDS_33785_Unigene_52548	CDS_28323_Unigene_45206	probable leucine-rich repeat receptor-like serine threonine- kinase At3g14840	1534.54	258.525	0.168471	-2.56943	0.0943084	No	0.862071	No	Down
XP_011079432	CDS_40023_Unigene_62969	CDS_981_Unigene_2092	PREDICTED: uncharacterized protein LOC105162950	107.719	19.718	0.183051	-2.44968	0.0943288	No	0.861785	No	Down
XP_011100482	CDS_21783_Unigene_35641	CDS_15187_Unigene_26112	serine threonine- kinase CDL1	2202.76	397.647	0.180522	-2.46975	0.0945018	No	0.862892	No	Down
XP_011088136	CDS_2446_Unigene_5675	CDS_193_Unigene_429	leucoanthocyanidin dioxygenase-like	928.39	4638.11	4.99587	2.32074	0.0946934	No	0.864168	No	Up
XP_011074157	CDS_32810_Unigene_51108	CDS_27498_Unigene_44020	phosphoglycerate mutase	450.958	61.3449	0.136032	-2.87798	0.0949573	No	0.866102	No	Down
XP_012839538	CDS_8890_Unigene_17276	CDS_13807_Unigene_24018	alpha-glucan H isozyme	21675.2	3873.49	0.178706	-2.48434	0.0949595	No	0.865648	No	Down
XP_011075560	CDS_7293_Unigene_14536	CDS_8242_Unigene_15343	pentatricopeptide repeat-containing mitochondrial	233.695	33.9588	0.145313	-2.78277	0.0949806	No	0.865367	No	Down
XP_011072393	CDS_21647_Unigene_35462	CDS_17721_Unigene_29730	PREDICTED: uncharacterized protein LOC105157660 isoform X1	116.847	795.293	6.80625	2.76686	0.0950689	No	0.865698	No	Up
XP_011088461	CDS_3157_Unigene_7066	CDS_2614_Unigene_5328	RING finger and CHY zinc finger domain-containing 1-like isoform X3	586.976	3066.15	5.22364	2.38506	0.0950793	No	0.86532	No	Up
EYU28141	CDS_7884_Unigene_15606	CDS_10731_Unigene_19311	hypothetical protein MIMGU_mgv1a008629mg	1007.81	156.649	0.155435	-2.68562	0.0951201	No	0.865219	No	Down
XP_011082957	CDS_34496_Unigene_53501	CDS_26189_Unigene_42112	PREDICTED: uncharacterized protein LOC105165590	705.649	100.781	0.14282	-2.80773	0.0951207	No	0.864753	No	Down
XP_011099314	CDS_28084_Unigene_44342	CDS_25387_Unigene_40968	probable cadmium zinc-transporting ATPase chloroplastic	1778.27	310.011	0.174333	-2.52009	0.0952383	No	0.86535	No	Down
XP_011077667	CDS_38071_Unigene_58306	CDS_3856_Unigene_7476	PREDICTED: L-arabinokinase-like	55.6851	407.506	7.31803	2.87146	0.0952589	No	0.865065	No	Up
XP_012849744	CDS_12904_Unigene_23166	CDS_18047_Unigene_30193	PREDICTED: LOW QUALITY PROTEIN: uncharacterized protein LOC105969521	457.348	62.4404	0.136527	-2.87274	0.0954283	No	0.866131	No	Down
XP_011098686	CDS_6121_Unigene_12486	CDS_29895_Unigene_47525	14-3-3 C	3892.48	771.193	0.198124	-2.33553	0.0954503	No	0.865859	No	Down
EYU17774	CDS_5409_Unigene_11327	CDS_12071_Unigene_21455	hypothetical protein MIMGU_mgv1a003108mg	123.238	828.157	6.72	2.74846	0.0955281	No	0.866094	No	Up
XP_011075404	CDS_23509_Unigene_37961	CDS_9459_Unigene_17213	condensin complex subunit 1	999.594	155.553	0.155616	-2.68393	0.0955994	No	0.866269	No	Down
XP_011078710	CDS_29070_Unigene_45625	CDS_19991_Unigene_32962	phospholipid-transporting ATPase 1-like	457.348	2468.04	5.39641	2.432	0.0956132	No	0.865923	No	Up
XP_012844706	CDS_30227_Unigene_47329	CDS_25106_Unigene_40571	zinc finger CCCH domain-containing 14-like isoform X1	1049.8	165.412	0.157565	-2.66598	0.0957715	No	0.866886	No	Down
XP_011073895	CDS_5215_Unigene_10979	CDS_5890_Unigene_11656	pentatricopeptide repeat-containing mitochondrial	261.081	37.2451	0.142657	-2.80937	0.0957882	No	0.866566	No	Down
XP_011073724	CDS_3122_Unigene_7003	CDS_17156_Unigene_28906	3-isopropylmalate dehydratase large subunit	336.849	1900.6	5.64228	2.49628	0.0957958	No	0.866164	No	Up
XP_011078620	CDS_27296_Unigene_43232	CDS_26467_Unigene_42523	chromatin assembly factor 1 subunit FAS1-like	202.657	30.6725	0.151351	-2.72403	0.0958124	No	0.865845	No	Down
XP_011088937	CDS_1429_Unigene_3140	CDS_32639_Unigene_51680	bifunctional nitrilase nitrile hydratase NIT4A	283.903	1645.36	5.7955	2.53493	0.095876	No	0.86595	No	Up
XP_011077808	CDS_19832_Unigene_32889	CDS_9818_Unigene_17777	PREDICTED: protein PHYLLO, chloroplastic	54.7723	398.742	7.28	2.86394	0.0959835	No	0.866451	No	Up
XP_011090015	CDS_23890_Unigene_38479	CDS_19888_Unigene_32803	alkaline neutral invertase CINV1	116.847	790.911	6.76875	2.75889	0.0960928	No	0.866968	No	Up
XP_011070508	CDS_2554_Unigene_5923	CDS_33752_Unigene_53802	Myb family transcription factor At1g14600	162.491	26.2907	0.161798	-2.62774	0.0963061	No	0.868422	No	Down
XP_011093084	CDS_23514_Unigene_37971	CDS_2868_Unigene_5754	REVEILLE 6 isoform X1	196.267	1204.99	6.13953	2.61813	0.0963388	No	0.868247	No	Up
XP_011082868	CDS_29577_Unigene_46372	CDS_17803_Unigene_29853	interactor of constitutive active ROPs 1-like	1458.77	246.475	0.168961	-2.56524	0.0964093	No	0.868414	No	Down
XP_011098587	CDS_12752_Unigene_22971	CDS_15437_Unigene_26493	translation factor GUF1 mitochondrial	580.586	81.0629	0.139623	-2.8404	0.0964731	No	0.868519	No	Down
XP_012842765	CDS_17852_Unigene_30199	CDS_17355_Unigene_29171	mitochondrial amidoxime reducing component 2-like	286.641	1653.03	5.76688	2.52779	0.0965543	No	0.86878	No	Up
XP_011095287	CDS_39026_Unigene_60576	CDS_11862_Unigene_21145	indole-3-acetic acid-amido synthetase	158.84	1010	6.35862	2.66871	0.096657	No	0.869235	No	Up
XP_011069700	CDS_22303_Unigene_36384	CDS_26826_Unigene_43010	probable inactive shikimate kinase like chloroplastic	351.455	1960.85	5.57922	2.48006	0.0967353	No	0.86947	No	Up
XP_011096221	CDS_10227_Unigene_19333	CDS_23521_Unigene_38210	PREDICTED: uncharacterized protein LOC105175472	52.0336	375.738	7.22105	2.85221	0.0969432	No	0.870868	No	Up
XP_012845886	CDS_29043_Unigene_45595	CDS_15217_Unigene_26165	flavin-containing monooxygenase FMO GS-OX-like 4 isoform X1	192.616	1180.89	6.13081	2.61608	0.0971935	No	0.872647	No	Up
XP_011082733	CDS_1077_Unigene_2426	CDS_33407_Unigene_53169	30S ribosomal S6 chloroplastic	180.748	28.4816	0.157576	-2.66588	0.0972092	No	0.872318	No	Down
XP_011090182	CDS_4386_Unigene_9484	CDS_8626_Unigene_15936	PREDICTED: uncharacterized protein LOC105170938 isoform X1	5555.73	1129.4	0.203286	-2.29842	0.0972759	No	0.872447	No	Down
XP_012845229	CDS_20637_Unigene_33958	CDS_12469_Unigene_22040	transmembrane and coiled-coil domain-containing 4-like	715.691	104.067	0.145408	-2.78182	0.097354	No	0.872677	No	Down
XP_012848840	CDS_21967_Unigene_35937	CDS_15159_Unigene_26066	PREDICTED: uncharacterized protein LOC105968733	961.253	4731.23	4.92194	2.29923	0.0973551	No	0.872218	No	Up
XP_011092418	CDS_11419_Unigene_21096	CDS_25295_Unigene_40843	PREDICTED: uncharacterized protein LOC105172601	961.253	4730.13	4.9208	2.29889	0.0974013	No	0.872163	No	Up
XP_011090175	CDS_12079_Unigene_22051	CDS_14406_Unigene_24916	F-box At2g32560-like	5786.69	1177.6	0.203502	-2.29688	0.0975968	No	0.873444	No	Down
XP_011099275	CDS_2458_Unigene_5709	CDS_7814_Unigene_14704	probable vacuolar amino acid transporter YPQ1	192.616	1177.6	6.11374	2.61206	0.097732	No	0.874184	No	Up
XP_011076793	CDS_4330_Unigene_9370	CDS_11852_Unigene_21128	zinc finger CONSTANS-LIKE 16	6128.1	1247.71	0.203605	-2.29616	0.0979349	No	0.87553	No	Down
XP_011075423	CDS_16687_Unigene_28603	CDS_13754_Unigene_23935	histidine--tRNA cytoplasmic isoform X1	651.79	3311.53	5.08067	2.34502	0.0979992	No	0.875634	No	Up
XP_011098203	CDS_15107_Unigene_26282	CDS_2347_Unigene_4942	gamma-glutamyl hydrolase 2-like	286.641	1640.98	5.72484	2.51724	0.0980254	No	0.875399	No	Up
XP_011072392	CDS_1169_Unigene_2599	CDS_32452_Unigene_51081	probable E3 ubiquitin ligase complex SCF subunit sconB	293.032	41.6269	0.142056	-2.81547	0.0981095	No	0.875681	No	Down
XP_011090005	CDS_5671_Unigene_11762	CDS_34003_Unigene_54450	pentatricopeptide repeat-containing chloroplastic	2350.64	12113.4	5.15324	2.36548	0.0981377	No	0.875464	No	Up
XP_011077829	CDS_23224_Unigene_37563	CDS_9790_Unigene_17735	PREDICTED: uncharacterized protein LOC105161734	718.429	105.163	0.146379	-2.77222	0.0982376	No	0.875886	No	Down
XP_011098902	CDS_13875_Unigene_24554	CDS_4423_Unigene_8650	nuclear transport factor 2-like	2646.41	503.905	0.19041	-2.39282	0.0984983	No	0.877741	No	Down
XP_012829326	CDS_20930_Unigene_34363	CDS_23305_Unigene_37920	probable Ufm1-specific protease	438.178	2345.35	5.3525	2.42021	0.0985349	No	0.877597	No	Up
XP_011083798	CDS_7982_Unigene_15792	CDS_2021_Unigene_4376	PREDICTED: uncharacterized protein LOC105166222 isoform X2	44.7307	315.488	7.05306	2.81825	0.0985571	No	0.877326	No	Up
XP_012849659	CDS_36307_Unigene_55913	CDS_29361_Unigene_46698	probable cytokinin riboside 5 -monophosphate phosphoribohydrolase LOGL10	565.98	79.9675	0.14129	-2.82327	0.0986324	No	0.877528	No	Down
XP_012827532	CDS_39188_Unigene_60795	CDS_33098_Unigene_52615	PREDICTED: alpha-glucosidase	633.532	3220.61	5.08357	2.34584	0.098651	No	0.877225	No	Up
XP_011082555	CDS_2821_Unigene_6419	CDS_7822_Unigene_14720	PREDICTED: cyclin-P3-1	2126.99	391.074	0.183863	-2.4433	0.0987507	No	0.877644	No	Down
XP_011079527	CDS_31075_Unigene_48562	CDS_23172_Unigene_37679	probable pre-mRNA-splicing factor ATP-dependent RNA helicase	2267.57	421.746	0.18599	-2.4267	0.0988375	No	0.877947	No	Down
XP_011099835	CDS_4322_Unigene_9360	CDS_2581_Unigene_5289	GDAP2 homolog	652.703	94.2083	0.144336	-2.7925	0.0989302	No	0.878302	No	Down
XP_011071397	CDS_9776_Unigene_18624	CDS_10669_Unigene_19237	PREDICTED: uncharacterized protein LOC105156856 isoform X1	29.2119	182.939	6.2625	2.64674	0.098952	No	0.878027	No	Up
EYU39274	CDS_9576_Unigene_18319	CDS_11562_Unigene_20700	hypothetical protein MIMGU_mgv1a004625mg	216.35	32.8634	0.151899	-2.71882	0.099123	No	0.879077	No	Down
XP_012846206	CDS_29240_Unigene_45925	CDS_24232_Unigene_39240	receptor kinase At4g00960	184.4	1127.21	6.11287	2.61185	0.0991441	No	0.878796	No	Up
XP_011083563	CDS_7895_Unigene_15630	CDS_10647_Unigene_19200	E3 ubiquitin- ligase LIN	438.178	61.3449	0.14	-2.8365	0.0993287	No	0.879965	No	Down
XP_011096796	CDS_37117_Unigene_57023	CDS_29911_Unigene_47558	PREDICTED: uncharacterized protein LOC105175870	1982.76	361.497	0.18232	-2.45545	0.0994656	No	0.880709	No	Down
XP_011095934	CDS_3110_Unigene_6976	CDS_199_Unigene_433	leucine-rich repeat flightless-interacting 2	1196.77	198.276	0.165675	-2.59357	0.099509	No	0.880625	No	Down
XP_011097951	CDS_23836_Unigene_38381	CDS_2936_Unigene_5859	transcription factor bHLH123-like	421.746	59.154	0.14026	-2.83383	0.0996798	No	0.881669	No	Down
XP_015387832	CDS_10389_Unigene_19590	CDS_6767_Unigene_13008	PREDICTED: uncharacterized protein LOC107177859	37.4277	253.048	6.76098	2.75723	0.0997087	No	0.881457	No	Up
XP_011077318	CDS_14727_Unigene_25818	CDS_11181_Unigene_20053	ABC transporter B family member 1	204.483	1225.8	5.99464	2.58367	0.0997116	No	0.881015	No	Up
XP_011069692	CDS_9928_Unigene_18852	CDS_2845_Unigene_5705	4,5-DOPA dioxygenase extradiol	199.919	1201.7	6.01096	2.5876	0.0998872	No	0.882099	No	Up
XP_011078883	CDS_27172_Unigene_43033	CDS_8704_Unigene_16045	polyol transporter 5-like isoform X1	1068.06	5178.17	4.84821	2.27745	0.099976	No	0.882415	No	Up
XP_011098066	CDS_21475_Unigene_35236	CDS_14328_Unigene_24798	transcription elongation factor B polypeptide 3	64.8138	458.992	7.08169	2.82409	0.100004	No	0.882197	No	Up
XP_011096878	CDS_1718_Unigene_4001	CDS_13169_Unigene_23071	PREDICTED: uncharacterized protein LOC105175928	7173.34	1467.9	0.204632	-2.28889	0.100057	No	0.882197	No	Down
XP_011100278	CDS_13701_Unigene_24290	CDS_16111_Unigene_27440	DNA repair RAD16	253.778	1466.8	5.77986	2.53103	0.100057	No	0.881732	No	Up
XP_011078182	CDS_11324_Unigene_20962	CDS_3736_Unigene_7305	beta-amyrin 28-oxidase-like	1953.54	9742.89	4.98729	2.31826	0.100143	No	0.88202	No	Up
XP_011069790	CDS_35401_Unigene_54772	CDS_26210_Unigene_42132	QWRF motif-containing 2-like	251.952	37.2451	0.147826	-2.75803	0.100282	No	0.882781	No	Down
XP_011072569	CDS_16402_Unigene_28215	CDS_6869_Unigene_13215	Brevis radix-like 2	936.606	147.885	0.157895	-2.66297	0.100334	No	0.882773	No	Down
EYU32428	CDS_21846_Unigene_35742	CDS_8133_Unigene_15183	hypothetical protein MIMGU_mgv1a014301mg	666.396	97.4946	0.146301	-2.77298	0.100432	No	0.883166	No	Down
XP_011086627	CDS_12822_Unigene_23058	CDS_2947_Unigene_5877	TRANSPARENT TESTA 12-like	78.5069	548.818	6.9907	2.80544	0.100524	No	0.883513	No	Up
XP_011092305	CDS_27063_Unigene_42837	CDS_27187_Unigene_43537	leucine-rich repeat receptor-like serine threonine- kinase BAM3	168.881	1040.67	6.16216	2.62344	0.1006	No	0.883706	No	Up
XP_011081824	CDS_32043_Unigene_49922	CDS_24464_Unigene_39623	la 1	1554.62	272.766	0.175455	-2.51083	0.100693	No	0.884057	No	Down
XP_011084656	CDS_18761_Unigene_31407	CDS_17269_Unigene_29062	pentatricopeptide repeat-containing At5g40400	93.1128	638.645	6.85882	2.77796	0.100703	No	0.883681	No	Up
XP_011086636	CDS_9475_Unigene_18211	CDS_1875_Unigene_4045	PREDICTED: uncharacterized protein LOC105168306 isoform X2	64.8138	456.801	7.04789	2.81719	0.100761	No	0.883725	No	Up
XP_011093267	CDS_33323_Unigene_51867	CDS_29072_Unigene_46286	BTB POZ domain-containing POB1-like isoform X2	140.582	894.979	6.36623	2.67044	0.101019	No	0.885528	No	Up
XP_011073578	CDS_22340_Unigene_36422	CDS_26197_Unigene_42119	probable inactive receptor kinase At4g23740	122.325	799.675	6.53731	2.7087	0.101061	No	0.885426	No	Up
XP_011092509	CDS_16875_Unigene_28874	CDS_5613_Unigene_11072	basic proline-rich -like	623.491	3139.55	5.03543	2.33212	0.101149	No	0.885731	No	Up
AKN09632	CDS_39900_Unigene_62743	CDS_1626_Unigene_3553	basic helix-loop-helix transcription factor	1246.98	210.325	0.168668	-2.56774	0.101189	No	0.885612	No	Down
XP_011074061	CDS_23722_Unigene_38212	CDS_9410_Unigene_17138	short-chain dehydrogenase reductase family 42E member 1	212.699	32.8634	0.154506	-2.69426	0.101248	No	0.885664	No	Down
XP_011101724	CDS_6_Unigene_43	CDS_2840_Unigene_5698	PREDICTED: uncharacterized protein LOC105179787	25.5604	147.885	5.78571	2.5325	0.101469	No	0.887136	No	Up
XP_011079990	CDS_17801_Unigene_30141	CDS_8662_Unigene_15983	glutathione chloroplastic	424.485	2250.04	5.30065	2.40617	0.101539	No	0.887281	No	Up
XP_011102195	CDS_11799_Unigene_21654	CDS_11362_Unigene_20379	pentatricopeptide repeat-containing At2g01510 isoform X2	15.5188	73.3948	4.72941	2.24166	0.101554	No	0.886944	No	Up
XP_012837242	CDS_9556_Unigene_18304	CDS_34272_Unigene_55087	lysM domain-containing GPI-anchored 2	251.04	1442.7	5.74691	2.52279	0.101582	No	0.886726	No	Up
XP_012851656	CDS_19307_Unigene_32185	CDS_32109_Unigene_50656	LRR receptor-like serine threonine- kinase RPK2	31.9505	202.657	6.34286	2.66513	0.101606	No	0.88647	No	Up
AJD25156	CDS_2630_Unigene_6069	CDS_2369_Unigene_4968	cytochrome P450 CYP71AT92	16.4317	78.872	4.8	2.26303	0.101671	No	0.886575	No	Up
CDP04933	CDS_32895_Unigene_51209	CDS_19312_Unigene_31916	unnamed protein product	146.059	25.1952	0.1725	-2.53533	0.101709	No	0.886446	No	Down
XP_011087967	CDS_32741_Unigene_51006	CDS_26880_Unigene_43107	S phase cyclin A-associated in the endoplasmic reticulum-like	1640.43	292.484	0.178297	-2.48764	0.101711	No	0.885994	No	Down
XP_011085814	CDS_32393_Unigene_50471	CDS_19233_Unigene_31812	potassium transporter 8-like	1435.95	249.761	0.173935	-2.52338	0.101818	No	0.886467	No	Down
XP_011074059	CDS_34237_Unigene_53132	CDS_23007_Unigene_37436	RNA-binding 24-B	345.978	1886.36	5.45224	2.44685	0.102008	No	0.887658	No	Up
XP_011096993	CDS_5909_Unigene_12145	CDS_9812_Unigene_17766	malignant T-cell-amplified sequence 1 homolog	1786.49	324.252	0.181502	-2.46194	0.10204	No	0.887471	No	Down
XP_011075966	CDS_13269_Unigene_23696	CDS_6503_Unigene_12576	myosin heavy striated muscle	2474.79	475.423	0.192106	-2.38002	0.102119	No	0.887692	No	Down
XP_011097686	CDS_14271_Unigene_25137	CDS_10157_Unigene_18328	PREDICTED: uncharacterized protein LOC105176546	511.208	73.3948	0.143571	-2.80016	0.102241	No	0.888292	No	Down
XP_011089641	CDS_13728_Unigene_24332	CDS_14121_Unigene_24456	adenylyltransferase and sulfurtransferase MOCS3	1218.68	205.944	0.168989	-2.565	0.10225	No	0.88791	No	Down
XP_011098257	CDS_31599_Unigene_49267	CDS_28920_Unigene_46071	apoptosis inhibitor 5-like	3142.1	627.69	0.199768	-2.32361	0.102324	No	0.888089	No	Down
XP_011075757	CDS_11368_Unigene_21016	CDS_7219_Unigene_13732	DNA-binding SMUBP-2	2281.26	11428.8	5.00984	2.32477	0.102422	No	0.888477	No	Up
XP_011088863	CDS_16435_Unigene_28264	CDS_18636_Unigene_30967	probable aldo-keto reductase 2 isoform X1	616.188	3089.16	5.01333	2.32577	0.10245	No	0.888256	No	Up
XP_011095434	CDS_29301_Unigene_46014	CDS_26354_Unigene_42318	cell differentiation RCD1 homolog	136.931	869.783	6.352	2.66721	0.102479	No	0.888047	No	Up
XP_011073063	CDS_24152_Unigene_38850	CDS_15540_Unigene_26595	PREDICTED: uncharacterized protein LOC105158123	101.329	19.718	0.194595	-2.36146	0.102518	No	0.887918	No	Down
XP_011072665	CDS_17213_Unigene_29335	CDS_24046_Unigene_38971	dnaJ homolog subfamily B member 6 isoform X2	545.897	78.872	0.144482	-2.79104	0.102523	No	0.887502	No	Down
XP_011089996	CDS_6973_Unigene_13905	CDS_12250_Unigene_21721	GABA transporter 1	193.529	1153.5	5.96038	2.5754	0.1026	No	0.887708	No	Up
XP_011075847	CDS_11268_Unigene_20880	CDS_8390_Unigene_15537	F-box At5g07610-like isoform X2	280.251	1574.15	5.61694	2.48978	0.102681	No	0.887946	No	Up
XP_012847639	CDS_38229_Unigene_58539	CDS_2447_Unigene_5107	SPIRAL1-like 1	5475.4	1144.74	0.20907	-2.25794	0.102808	No	0.888589	No	Down
XP_011098375	CDS_7442_Unigene_14809	CDS_2430_Unigene_5081	PREDICTED: uncharacterized protein LOC105177049	551.374	79.9675	0.145033	-2.78555	0.102999	No	0.889778	No	Down
XP_011097320	CDS_8694_Unigene_16962	CDS_3061_Unigene_6078	54S ribosomal mitochondrial	806.065	124.881	0.154926	-2.69035	0.103056	No	0.889806	No	Down
XP_012845096	CDS_31107_Unigene_48583	CDS_30402_Unigene_48254	PREDICTED: uncharacterized protein LOC105965123 isoform X1	102.242	682.462	6.675	2.73877	0.103128	No	0.889964	No	Up
EYU31802	CDS_36685_Unigene_56440	CDS_31532_Unigene_49814	hypothetical protein MIMGU_mgv1a023986mg, partial	922.913	147.885	0.160237	-2.64172	0.103292	No	0.890916	No	Down
XP_006352841	CDS_15593_Unigene_27012	CDS_18402_Unigene_30617	eyes absent homolog 2	500.253	72.2994	0.144526	-2.7906	0.103477	No	0.89205	No	Down
XP_011099853	CDS_28093_Unigene_44361	CDS_25373_Unigene_40951	calcium-dependent kinase 28-like	360.584	1940.03	5.38025	2.42767	0.103499	No	0.89178	No	Up
XP_011097592	CDS_21417_Unigene_35139	CDS_9447_Unigene_17196	probable trehalose-phosphate phosphatase J	943.909	152.267	0.161315	-2.63204	0.103517	No	0.89148	No	Down
XP_011092358	CDS_24586_Unigene_39461	CDS_14288_Unigene_24748	F-box At1g10780	324.069	47.1041	0.145352	-2.78238	0.103549	No	0.891293	No	Down
XP_011096932	CDS_7383_Unigene_14708	CDS_290_Unigene_620	PREDICTED: uncharacterized protein LOC105175980	281.164	41.6269	0.148052	-2.75582	0.103723	No	0.892329	No	Down
XP_011098887	CDS_19779_Unigene_32831	CDS_8872_Unigene_16333	PREDICTED: uncharacterized protein LOC105177426 isoform X2	232.782	1339.73	5.75529	2.52489	0.103772	No	0.892291	No	Up
A0PDV5	CDS_39024_Unigene_60574	CDS_32618_Unigene_51661	RAS_PLESU ame: Full=Rosmarinate synthase Short= ame: Full=Hydroxycinnamoyl transferase Short= 1	3197.79	16541.2	5.17271	2.37092	0.103878	No	0.892743	No	Up
XP_011078156	CDS_16962_Unigene_28989	CDS_14631_Unigene_25238	PREDICTED: pectinesterase	41.0792	274.957	6.69333	2.74272	0.103889	No	0.892378	No	Up
EYU17693	CDS_9226_Unigene_17814	CDS_4776_Unigene_9265	hypothetical protein MIMGU_mgv1a001245mg	134.192	24.0998	0.179592	-2.47721	0.104179	No	0.893944	No	Down
XP_010687042	CDS_8537_Unigene_16711	CDS_33421_Unigene_53320	30-kDa cleavage and polyadenylation specificity factor 30	134.192	24.0998	0.179592	-2.47721	0.104179	No	0.894405	No	Down
XP_012842685	CDS_27220_Unigene_43117	CDS_23989_Unigene_38862	40S ribosomal S15-1-like	4065.93	21633.9	5.32079	2.41164	0.104236	No	0.893976	No	Up
XP_011090550	CDS_33533_Unigene_52164	CDS_21771_Unigene_35648	PREDICTED: transketolase, chloroplastic	13673	94570.9	6.91662	2.79007	0.104254	No	0.893664	No	Up
XP_011070605	CDS_31764_Unigene_49520	CDS_5415_Unigene_10663	PREDICTED: uncharacterized protein LOC105156229	3693.48	762.43	0.206426	-2.2763	0.104447	No	0.894863	No	Down
XP_012853623	CDS_39052_Unigene_60607	CDS_17321_Unigene_29129	PREDICTED: uncharacterized protein At4g06744-like	19554.6	3724.51	0.190467	-2.39238	0.104598	No	0.895694	No	Down
XP_015161168	CDS_38915_Unigene_60014	CDS_34630_Unigene_55749	thiosulfate sulfurtransferase 18 isoform X2	304.899	44.9132	0.147305	-2.76312	0.104681	No	0.895942	No	Down
XP_011091228	CDS_30222_Unigene_47324	CDS_22281_Unigene_36348	lysophospholipid acyltransferase LPEAT2	269.297	1507.33	5.59729	2.48473	0.10475	No	0.896075	No	Up
XP_011093575	CDS_16964_Unigene_28992	CDS_14742_Unigene_25395	PREDICTED: sacsin	848.97	4064.1	4.7871	2.25915	0.10477	No	0.895788	No	Up
XP_011079334	CDS_23418_Unigene_37842	CDS_24756_Unigene_40044	GPI mannosyltransferase 3	452.784	65.7267	0.145161	-2.78427	0.104842	No	0.895938	No	Down
XP_011089332	CDS_33958_Unigene_52784	CDS_26237_Unigene_42171	E3 SUMO- ligase SIZ1-like isoform X2	73.0297	499.523	6.84	2.774	0.104891	No	0.895901	No	Up
XP_012842472	CDS_24420_Unigene_39215	CDS_13452_Unigene_23503	GDSL esterase lipase LTL1-like	6914.08	1451.46	0.209929	-2.25203	0.104904	No	0.895551	No	Down
XP_011091465	CDS_30376_Unigene_47548	CDS_32942_Unigene_52076	pentatricopeptide repeat-containing mitochondrial	377.016	54.7723	0.145278	-2.78311	0.104953	No	0.895512	No	Down
XP_011079216	CDS_29058_Unigene_45619	CDS_16131_Unigene_27460	PREDICTED: protein PNS1-like	22.8218	121.594	5.328	2.41359	0.104967	No	0.895171	No	Up
XP_008339062	CDS_25422_Unigene_40596	CDS_20002_Unigene_32976	probable leucine-rich repeat receptor kinase At1g35710	5.47723	20.8135	3.8	1.926	0.10514	No	0.896188	No	Up
XP_011081802	CDS_21770_Unigene_35617	CDS_1689_Unigene_3653	PREDICTED: uncharacterized protein LOC105164751	286.641	42.7224	0.149045	-2.74618	0.105291	No	0.897022	No	Down
XP_011075382	CDS_15636_Unigene_27072	CDS_11552_Unigene_20681	EARLY RESPONSIVE TO DEHYDRATION 15-like	509.382	2587.44	5.07957	2.34471	0.105295	No	0.896597	No	Up
AKV93685	CDS_17574_Unigene_29801	CDS_32373_Unigene_50965	clade XVIII lectin receptor kinase	1539.1	7334.01	4.76512	2.25251	0.105353	No	0.896627	No	Up
XP_011071245	CDS_24424_Unigene_39229	CDS_32881_Unigene_51978	PREDICTED: glutaredoxin-C5-like	241.911	37.2451	0.153962	-2.69935	0.105636	No	0.898584	No	Down
XP_012858564	CDS_6097_Unigene_12437	CDS_27028_Unigene_43326	NRT1 PTR FAMILY	260.168	1458.04	5.60421	2.48651	0.105646	No	0.898209	No	Up
XP_011070560	CDS_5394_Unigene_11301	CDS_3628_Unigene_7148	adagio 3 isoform X1	7332.18	1542.39	0.210359	-2.24908	0.105891	No	0.89983	No	Down
EPS64091	CDS_25389_Unigene_40561	CDS_16623_Unigene_28167	hypothetical protein M569_10692	412.618	60.2495	0.146018	-2.77578	0.105999	No	0.900286	No	Down
XP_011077243	CDS_16715_Unigene_28645	CDS_8499_Unigene_15725	probable LRR receptor-like serine threonine- kinase At1g51880 isoform X1	895.526	4243.75	4.73884	2.24453	0.106105	No	0.900729	No	Up
XP_011073560	CDS_31394_Unigene_48970	CDS_20801_Unigene_34185	kinesin KIF22	427.224	62.4404	0.146154	-2.77444	0.106119	No	0.900388	No	Down
XP_011096222	CDS_1973_Unigene_4538	CDS_6689_Unigene_12872	PREDICTED: uncharacterized protein LOC105175473	441.83	64.6313	0.146281	-2.77319	0.106171	No	0.900373	No	Down
KOM31006	CDS_40532_Unigene_64348	CDS_34213_Unigene_54864	hypothetical protein LR48_Vigan01g056100	186.226	1097.64	5.89412	2.55928	0.106183	No	0.900019	No	Up
XP_011097094	CDS_34364_Unigene_53313	CDS_25134_Unigene_40607	UPF0586 C9orf41 homolog isoform X2	45.6435	305.629	6.696	2.7433	0.106309	No	0.900627	No	Up
XP_012848149	CDS_9634_Unigene_18415	CDS_8539_Unigene_15786	PREDICTED: uncharacterized protein LOC105968079	334.111	49.295	0.147541	-2.76081	0.106392	No	0.900876	No	Down
XP_011072550	CDS_21894_Unigene_35833	CDS_16443_Unigene_27904	PREDICTED: uncharacterized protein LOC105157772	1973.63	373.547	0.189269	-2.40149	0.106405	No	0.900525	No	Down
XP_012846161	CDS_31327_Unigene_48869	CDS_27720_Unigene_44336	two-component response regulator ARR2	470.129	69.013	0.146796	-2.76811	0.106433	No	0.900305	No	Down
XP_011083366	CDS_7779_Unigene_15415	CDS_5586_Unigene_11016	PREDICTED: uncharacterized protein LOC105165908 isoform X2	108.632	705.467	6.49412	2.69913	0.106508	No	0.900485	No	Up
XP_011083617	CDS_3663_Unigene_7936	CDS_8706_Unigene_16049	BEL1-like homeodomain 11	440.917	64.6313	0.146584	-2.7702	0.106512	No	0.900058	No	Down
XP_011077788	CDS_8083_Unigene_15947	CDS_7729_Unigene_14578	chaperonin 60 subunit beta chloroplastic isoform X1	5620.55	1196.23	0.212831	-2.23222	0.106552	No	0.899944	No	Down
XP_011086434	CDS_15724_Unigene_27201	CDS_17379_Unigene_29199	PREDICTED: uncharacterized protein LOC105168175	86.7227	580.586	6.69474	2.74303	0.106569	No	0.899629	No	Up
XP_012829547	CDS_11524_Unigene_21234	CDS_2709_Unigene_5463	probable cinnamyl alcohol dehydrogenase 6	925.651	4367.54	4.71834	2.23828	0.106584	No	0.8993	No	Up
XP_011073970	CDS_966_Unigene_2240	CDS_34430_Unigene_55288	PREDICTED: uncharacterized protein LOC105158797	37.4277	239.902	6.40976	2.68027	0.106758	No	0.900312	No	Up
KDO35993	CDS_10712_Unigene_20035	CDS_8901_Unigene_16381	hypothetical protein CISIN_1g027682mg	20.0832	99.6855	4.96364	2.3114	0.106761	No	0.899878	No	Up
XP_011070785	CDS_11091_Unigene_20599	CDS_5382_Unigene_10583	PREDICTED: uncharacterized protein LOC105156369	49.295	331.92	6.73333	2.75132	0.106761	No	0.899427	No	Up
XP_012849055	CDS_26306_Unigene_41804	CDS_29042_Unigene_46246	TRANSPORT INHIBITOR RESPONSE 1-like	1682.42	310.011	0.184265	-2.44015	0.106774	No	0.89908	No	Down
XP_011098629	CDS_4087_Unigene_8914	CDS_1677_Unigene_3638	probable rhamnogalacturonate lyase B	21.9089	112.831	5.15	2.36457	0.106817	No	0.898991	No	Up
XP_012832805	CDS_11300_Unigene_20926	CDS_760_Unigene_1715	pyrophosphate--fructose 6-phosphate 1-phosphotransferase subunit alpha-like	2066.74	9991.55	4.83445	2.27335	0.106916	No	0.899368	No	Up
XP_011098244	CDS_5468_Unigene_11426	CDS_14342_Unigene_24830	stress response nst1	1805.66	337.397	0.186855	-2.42001	0.106968	No	0.89935	No	Down
XP_012837494	CDS_17509_Unigene_29726	CDS_17115_Unigene_28870	PREDICTED: fructokinase-2	2538.69	502.809	0.198058	-2.336	0.107136	No	0.900306	No	Down
XP_011072619	CDS_29605_Unigene_46411	CDS_21814_Unigene_35701	PREDICTED: uncharacterized protein LOC105157824 isoform X1	558.677	83.2538	0.14902	-2.74643	0.107165	No	0.900099	No	Down
XP_012843081	CDS_565_Unigene_1266	CDS_7912_Unigene_14861	tetratricopeptide repeat 7A isoform X2	732.122	113.926	0.155611	-2.68398	0.107277	No	0.900588	No	Down
XP_011080013	CDS_29234_Unigene_45918	CDS_21587_Unigene_35351	iron-sulfur NUBPL	1723.5	319.87	0.185593	-2.42978	0.107282	No	0.900171	No	Down
XP_011092102	CDS_12229_Unigene_22247	CDS_12234_Unigene_21697	F-box PP2-B15-like	551.374	82.1584	0.149007	-2.74655	0.107324	No	0.900076	No	Down
XP_011096384	CDS_11806_Unigene_21666	CDS_12228_Unigene_21690	GDSL esterase lipase At5g45960	926.564	152.267	0.164335	-2.60529	0.107351	No	0.899847	No	Down
XP_012858601	CDS_6354_Unigene_12861	CDS_2209_Unigene_4694	PREDICTED: uncharacterized protein LOC105977774	2854.55	577.3	0.202239	-2.30587	0.107582	No	0.901331	No	Down
XP_011086893	CDS_2358_Unigene_5368	CDS_4101_Unigene_7879	probable beta-1,4-xylosyltransferase IRX10	29.2119	170.889	5.85	2.54844	0.107591	No	0.90095	No	Up
XP_011086083	CDS_28421_Unigene_44823	CDS_23551_Unigene_38256	PREDICTED: uncharacterized protein LOC105167912	198.093	1148.03	5.79539	2.53491	0.107611	No	0.900666	No	Up
XP_011086507	CDS_34044_Unigene_52884	CDS_28466_Unigene_45427	PREDICTED: uncharacterized protein LOC105168222 isoform X1	1544.58	281.529	0.18227	-2.45585	0.107686	No	0.900843	No	Down
XP_011089973	CDS_9843_Unigene_18729	CDS_14816_Unigene_25525	PREDICTED: uncharacterized protein At1g08160-like	1287.15	226.757	0.17617	-2.50496	0.107712	No	0.900611	No	Down
XP_011087202	CDS_34627_Unigene_53700	CDS_29221_Unigene_46501	PREDICTED: uncharacterized protein LOC105168755 isoform X2	204.483	1177.6	5.75893	2.5258	0.1079	No	0.90173	No	Up
XP_011093199	CDS_889_Unigene_2130	CDS_2626_Unigene_5345	65-kDa microtubule-associated 3	1707.07	317.679	0.186096	-2.42588	0.108109	No	0.90302	No	Down
XP_011079409	CDS_18127_Unigene_30566	CDS_14629_Unigene_25237	PREDICTED: uncharacterized protein LOC105162931	692.869	107.354	0.154941	-2.69021	0.108416	No	0.905132	No	Down
XP_011075658	CDS_15819_Unigene_27344	CDS_5293_Unigene_10335	PREDICTED: uncharacterized protein LOC105160092	376.103	55.8677	0.148544	-2.75104	0.108563	No	0.905903	No	Down
XP_011076937	CDS_36074_Unigene_55582	CDS_31264_Unigene_49431	PREDICTED: uncharacterized protein LOC105161066 isoform X1	570.544	2812.01	4.92864	2.30119	0.108601	No	0.905769	No	Up
XP_011093187	CDS_40014_Unigene_62954	CDS_3023_Unigene_6013	glyoxylate hydroxypyruvate reductase HPR3	125.976	788.72	6.26087	2.64636	0.108615	No	0.905434	No	Up
[truncated: 14,665 more rows]

## Sheet: Upregulated
ID	Control_Seq_ID	Flood_Seq_ID	Sequence_Description	Control_baseMean	Flood_baseMean	foldChange	log2FoldChange	pval	Significance	padj	Significance	Regulation
XP_011071684	CDS_23490_Unigene_37937	CDS_25380_Unigene_40962	PHYTOCHROME KINASE SUBSTRATE 3-like	3.65148	4591.01	1257.3	10.2961	3.08055e-07	Yes	0.00513343	Yes	Up
AJD25200	CDS_2292_Unigene_5195	CDS_1921_Unigene_4179	cytochrome P450 CYP82D70	18.2574	13963.6	764.82	9.57898	8.384e-07	Yes	0.00698555	Yes	Up
AGZ90153	CDS_334_Unigene_714	CDS_7454_Unigene_14068	elongation factor 1- partial	32.8634	35889	1092.07	10.0928	1.43646e-06	Yes	0.00797906	Yes	Up
EYU46421	CDS_10295_Unigene_19442	CDS_6664_Unigene_12826	hypothetical protein MIMGU_mgv1a001868mg	27.3861	13987.7	510.76	8.9965	2.15357e-06	Yes	0.00897177	Yes	Up
EYU27838	CDS_1284_Unigene_2792	CDS_3973_Unigene_7681	hypothetical protein MIMGU_mgv1a002249mg	33.7762	19681.9	582.714	9.18664	2.43357e-06	Yes	0.0081106	Yes	Up
XP_011075655	CDS_2526_Unigene_5868	CDS_32624_Unigene_51667	auxin efflux carrier component 7-like	31.9505	14732.6	461.109	8.84896	2.92678e-06	Yes	0.00812864	Yes	Up
XP_011100245	CDS_12189_Unigene_22188	CDS_34281_Unigene_55096	26S proteasome non-ATPase regulatory subunit 2 homolog A-like	38.3406	17936.8	467.829	8.86984	3.60417e-06	Yes	0.00857998	Yes	Up
XP_011070630	CDS_1509_Unigene_3276	CDS_6620_Unigene_12754	auxin efflux carrier component 7-like	25.5604	8772.32	343.2	8.42291	3.64195e-06	Yes	0.00758618	Yes	Up
XP_011081443	CDS_3172_Unigene_7079	CDS_32698_Unigene_51750	cellulose synthase G3	18.2574	6044.67	331.08	8.37104	3.78441e-06	Yes	0.00700705	Yes	Up
XP_009626262	CDS_7833_Unigene_15513	CDS_977_Unigene_2086	glyoxylate hydroxypyruvate reductase HPR3-like	20.0832	6123.54	304.909	8.25224	4.59862e-06	Yes	0.00766314	Yes	Up
XP_003593234	CDS_12972_Unigene_23286	CDS_7173_Unigene_13677	2-oxoglutarate malate translocator	7.30297	3325.77	455.4	8.83099	4.70215e-06	Yes	0.00712333	Yes	Up
XP_012833351	CDS_12051_Unigene_22012	CDS_29005_Unigene_46192	ATP synthase subunit mitochondrial	43.8178	18057.3	412.1	8.68685	4.887e-06	Yes	0.00678641	Yes	Up
XP_011093699	CDS_12160_Unigene_22167	CDS_341_Unigene_747	serine acetyltransferase 5-like	21.9089	6181.6	282.15	8.14032	5.54076e-06	Yes	0.0071024	Yes	Up
XP_011079922	CDS_12426_Unigene_22539	CDS_6655_Unigene_12809	BEACH domain-containing lvsA isoform X1	27.3861	7495.04	273.68	8.09635	6.00557e-06	Yes	0.00667179	Yes	Up
XP_011080481	CDS_349_Unigene_765	CDS_6586_Unigene_12699	ABC transporter G family member 35-like	11.8673	3608.4	304.062	8.24822	9.30392e-06	Yes	0.00912003	Yes	Up
AAR09603	CDS_1813_Unigene_4283	CDS_5964_Unigene_11772	O-methyltransferase	41.9921	8548.85	203.583	7.66947	1.30687e-05	Yes	0.0120987	Yes	Up
XP_011100028	CDS_16662_Unigene_28564	CDS_22639_Unigene_36894	PREDICTED: putative uncharacterized protein At4g01020, chloroplastic	21.9089	4378.49	199.85	7.64277	1.74186e-05	Yes	0.0138221	Yes	Up
XP_011100202	CDS_11795_Unigene_21642	CDS_27159_Unigene_43484	phosphoenolpyruvate carboxylase 1-like	104.98	26904.1	256.278	8.00157	2.35542e-05	Yes	0.0170655	Yes	Up
XP_011080360	CDS_39472_Unigene_61675	CDS_32283_Unigene_50867	phospholipase A1- chloroplastic	10.9545	2578.68	235.4	7.87897	3.02506e-05	Yes	0.0201638	Yes	Up
XP_011088308	CDS_1503_Unigene_3248	CDS_33866_Unigene_54278	flavonol synthase flavanone 3-hydroxylase-like	39.2534	5499.13	140.093	7.13024	3.26575e-05	Yes	0.0194359	Yes	Up
XP_012847135	CDS_574_Unigene_1283	CDS_14995_Unigene_25802	NUCLEAR FUSION DEFECTIVE 4-like	15.5188	3057.39	197.012	7.62214	3.27526e-05	Yes	0.0188203	Yes	Up
XP_011069870	CDS_2772_Unigene_6354	CDS_1744_Unigene_3728	EIN3-binding F-box 1	88.5485	13021.6	147.056	7.20022	4.02053e-05	Yes	0.0216123	Yes	Up
XP_011083298	CDS_16276_Unigene_28044	CDS_2254_Unigene_4761	polyphenol oxidase chloroplastic-like	18.2574	3180.08	174.18	7.44444	4.02185e-05	Yes	0.0209438	Yes	Up
XP_011083369	CDS_29563_Unigene_46348	CDS_28940_Unigene_46096	PREDICTED: protein LYK5	12.7802	2550.2	199.543	7.64055	4.35057e-05	Yes	0.0207137	Yes	Up
AJD25187	CDS_2676_Unigene_6187	CDS_10326_Unigene_18617	cytochrome P450 CYP77A27	52.0336	6075.34	116.758	6.86738	4.97229e-05	Yes	0.0218048	Yes	Up
XP_007042945	CDS_702_Unigene_1684	CDS_6201_Unigene_12138	HXXXD-type acyl-transferase family	12.7802	2457.08	192.257	7.58689	5.01784e-05	Yes	0.0214403	Yes	Up
XP_012832933	CDS_14662_Unigene_25739	CDS_32598_Unigene_51609	F-box LRR-repeat MAX2 homolog A	30.1247	3891.02	129.164	7.01306	5.81241e-05	Yes	0.0236239	Yes	Up
XP_011087632	CDS_31062_Unigene_48536	CDS_21528_Unigene_35261	chloride channel CLC-c	62.0752	6451.08	103.924	6.69938	6.65737e-05	Yes	0.0264139	Yes	Up
XP_011081428	CDS_2552_Unigene_5919	CDS_32157_Unigene_50718	pre-mRNA-processing-splicing factor 8	161.578	25647.7	158.732	7.31045	6.68222e-05	Yes	0.0258959	Yes	Up
XP_011075207	CDS_21712_Unigene_35539	CDS_26184_Unigene_42106	neutral alpha-glucosidase C	31.9505	3789.14	118.594	6.88989	7.38704e-05	Yes	0.0279767	Yes	Up
AJD25248	CDS_39035_Unigene_60585	CDS_33855_Unigene_54265	cytochrome P450 CYP716A89	189.877	26158.1	137.763	7.10605	9.4417e-05	Yes	0.0327784	Yes	Up
XP_011081312	CDS_15218_Unigene_26440	CDS_6739_Unigene_12948	PREDICTED: uncharacterized protein LOC105164372	32.8634	3604.01	109.667	6.77698	9.53984e-05	Yes	0.0324432	Yes	Up
XP_011098534	CDS_4662_Unigene_9978	CDS_2355_Unigene_4954	NRT1 PTR FAMILY -like	20.0832	2600.59	129.491	7.01671	0.000106072	Yes	0.0346585	Yes	Up
XP_011088856	CDS_31910_Unigene_49717	CDS_31543_Unigene_49832	pleiotropic drug resistance 2-like	88.5485	7259.51	81.9835	6.35726	0.000122886	Yes	0.0379217	Yes	Up
EYU20852	CDS_10168_Unigene_19249	CDS_1275_Unigene_2936	hypothetical protein MIMGU_mgv1a005530mg	31.0376	3228.28	104.012	6.7006	0.000126371	Yes	0.0376044	Yes	Up
XP_012828939	CDS_26212_Unigene_41672	CDS_10975_Unigene_19677	callose synthase 9	124.15	10744.1	86.5412	6.43531	0.000127231	Yes	0.0371961	Yes	Up
XP_011091239	CDS_8962_Unigene_17392	CDS_3725_Unigene_7289	pre-mRNA-processing factor 19-like	95.8514	7776.56	81.1314	6.34219	0.00012821	Yes	0.0368361	Yes	Up
XP_011098287	CDS_11632_Unigene_21368	CDS_2015_Unigene_4368	MATE efflux family LAL5-like	105.893	8390.01	79.231	6.30799	0.000139508	Yes	0.0381108	Yes	Up
XP_011086346	CDS_39072_Unigene_60630	CDS_32315_Unigene_50901	phosphoglycerate chloroplastic	391.622	143821	367.245	8.5206	0.000144518	Yes	0.0376289	Yes	Up
XP_011073073	CDS_2315_Unigene_5258	CDS_22921_Unigene_37324	acetolactate synthase chloroplastic	170.707	16082.2	94.2096	6.5578	0.000145868	Yes	0.0373963	Yes	Up
XP_011070676	CDS_16063_Unigene_27683	CDS_17942_Unigene_30065	ALG-2 interacting X-like	31.9505	3151.6	98.64	6.6241	0.000147637	Yes	0.0367197	Yes	Up
XP_012836394	CDS_29537_Unigene_46314	CDS_26427_Unigene_42449	glycosyltransferase-like KOBITO 1	27.3861	2810.91	102.64	6.68145	0.000158094	Yes	0.0381808	Yes	Up
AJD25223	CDS_18044_Unigene_30466	CDS_34593_Unigene_55572	cytochrome P450 CYP94D47	16.4317	2061.63	125.467	6.97116	0.000162334	Yes	0.0386448	Yes	Up
XP_011078273	CDS_39403_Unigene_61579	CDS_6516_Unigene_12599	CRS2-associated factor chloroplastic	40.1663	3428.74	85.3636	6.41555	0.000183638	Yes	0.040265	Yes	Up
XP_011070276	CDS_21036_Unigene_34533	CDS_25796_Unigene_41537	PREDICTED: LOW QUALITY PROTEIN: uncharacterized protein LOC105155975	95.8514	6552.95	68.3657	6.0952	0.000192225	Yes	0.0410671	Yes	Up
AKN09620	CDS_39149_Unigene_60733	CDS_18216_Unigene_30407	basic helix-loop-helix transcription factor	115.022	7268.28	63.1905	5.98164	0.000237648	Yes	0.0477128	Yes	Up
XP_011069526	CDS_2779_Unigene_6361	CDS_33191_Unigene_52736	chlorophyllide a chloroplastic-like	214.525	16435	76.6111	6.25948	0.000244378	Yes	0.0484799	Yes	Up
XP_011100311	CDS_38070_Unigene_58304	CDS_31947_Unigene_50411	probable histone-lysine N-methyltransferase ATXR3 isoform X2	41.0792	3187.75	77.6	6.27798	0.000252227	Yes	0.0488734	Yes	Up
ADO16250	CDS_8405_Unigene_16456	CDS_24207_Unigene_39205	p-coumaroyl shikimate 3 -hydroxylase	172.533	11441.9	66.3175	6.05132	0.000257962	Yes	0.0488486	Yes	Up
XP_011070424	CDS_1678_Unigene_3880	CDS_33715_Unigene_53724	PREDICTED: uncharacterized protein LOC105156082	1.82574	600.304	328.8	8.36107	0.000263758	Yes	0.049385	Yes	Up
XP_011069930	CDS_37470_Unigene_57483	CDS_31283_Unigene_49457	plasma membrane ATPase 4	78.5069	4849.54	61.7721	5.94888	0.000273285	Yes	0.0500442	Yes	Up
XP_011076386	CDS_1652_Unigene_3795	CDS_13471_Unigene_23527	leucine-rich repeat receptor kinase TDR	27.3861	2362.88	86.28	6.43095	0.000293973	Yes	0.0526749	No	Up
XP_011073515	CDS_40463_Unigene_64093	CDS_471_Unigene_1016	1-aminocyclopropane-1-carboxylate oxidase homolog 1-like	44.7307	3195.41	71.4367	6.15859	0.000304334	Yes	0.0539513	No	Up
XP_011073820	CDS_38419_Unigene_58793	CDS_32815_Unigene_51892	probably inactive leucine-rich repeat receptor kinase At3g28040	149.711	8661.68	57.8561	5.8544	0.000312182	Yes	0.05476	No	Up
XP_011079781	CDS_9848_Unigene_18738	CDS_32652_Unigene_51694	sugar transporter ERD6-like 7	136.931	7799.57	56.96	5.83188	0.000313919	Yes	0.0544911	No	Up
XP_011092371	CDS_37792_Unigene_57922	CDS_32170_Unigene_50740	mediator of RNA polymerase II transcription subunit 12 isoform X1	53.8594	3571.15	66.3051	6.05105	0.000315399	Yes	0.0541836	No	Up
XP_011084497	CDS_30072_Unigene_47080	CDS_14206_Unigene_24607	cyclic nucleotide-gated ion channel 1-like	221.828	14209	64.0543	6.00122	0.000333754	Yes	0.0567518	No	Up
XP_011094242	CDS_1618_Unigene_3662	CDS_22260_Unigene_36322	trafficking particle complex subunit 8	32.8634	2534.86	77.1333	6.26928	0.000342194	Yes	0.0564586	No	Up
XP_011085084	CDS_39618_Unigene_61902	CDS_32377_Unigene_50968	protoheme IX mitochondrial	50.2079	3269.9	65.1273	6.02519	0.000366306	Yes	0.0592633	No	Up
XP_011080114	CDS_6360_Unigene_12871	CDS_5209_Unigene_10116	PREDICTED: uncharacterized protein LOC105163461	181.661	10101.1	55.604	5.79712	0.000370298	Yes	0.0593331	No	Up
XP_011089458	CDS_2655_Unigene_6136	CDS_32805_Unigene_51881	probable phosphatase 2C 4	62.9881	3747.52	59.4957	5.89471	0.000385223	Yes	0.0611367	No	Up
XP_011079085	CDS_18971_Unigene_31676	CDS_28187_Unigene_45035	transcription factor PCL1	227.305	13459.7	59.2145	5.88788	0.000386681	Yes	0.0607892	No	Up
XP_011082534	CDS_14108_Unigene_24911	CDS_8650_Unigene_15969	piezo-type mechanosensitive ion channel homolog isoform X2	20.996	1855.68	88.3826	6.46569	0.000389187	Yes	0.0606113	No	Up
XP_011091509	CDS_35609_Unigene_55025	CDS_27033_Unigene_43336	phosphatase 2C 37-like	42.9049	2894.17	67.4553	6.07586	0.000391978	Yes	0.0604808	No	Up
XP_011082006	CDS_4562_Unigene_9789	CDS_22446_Unigene_36592	TIC chloroplastic	13.6931	1435.03	104.8	6.71149	0.000395811	Yes	0.0605119	No	Up
XP_011077109	CDS_10069_Unigene_19075	CDS_2062_Unigene_4435	late blight resistance homolog R1B-14	37.4277	2624.69	70.1268	6.13189	0.00040435	Yes	0.0607035	No	Up
XP_011093340	CDS_39805_Unigene_62616	CDS_7572_Unigene_14278	receptor kinase HSL1	26.4733	2084.63	78.7448	6.29911	0.000423017	Yes	0.0623819	No	Up
XP_011090662	CDS_28608_Unigene_45046	CDS_18754_Unigene_31144	PREDICTED: uncharacterized protein LOC105171293	51.1208	3173.5	62.0786	5.95602	0.000424399	Yes	0.0620367	No	Up
XP_011094989	CDS_24082_Unigene_38746	CDS_17353_Unigene_29168	auxin transporter 2	83.9841	4455.18	53.0478	5.72922	0.000426025	Yes	0.0617329	No	Up
XP_012855821	CDS_10499_Unigene_19755	CDS_7747_Unigene_14614	nuclear mitotic apparatus 1	28.299	2161.31	76.3742	6.25501	0.000430379	Yes	0.0612977	No	Up
XP_011090906	CDS_5714_Unigene_11824	CDS_8644_Unigene_15963	PREDICTED: uncharacterized protein LOC105171472 isoform X1	48.3822	3017.95	62.3774	5.96295	0.000445688	Yes	0.0618912	No	Up
XP_011095609	CDS_34523_Unigene_53545	CDS_23718_Unigene_38433	enhancer of mRNA-decapping 4-like	181.661	9060.43	49.8754	5.64026	0.000461557	Yes	0.0630441	No	Up
XP_011096686	CDS_848_Unigene_2069	CDS_8838_Unigene_16288	receptor kinase HAIKU2	196.267	9718.79	49.5181	5.62989	0.000485012	Yes	0.0646579	No	Up
XP_011080258	CDS_9341_Unigene_17993	CDS_1119_Unigene_2430	PREDICTED: uncharacterized protein LOC105163554	213.612	10805.5	50.5846	5.66063	0.000487036	Yes	0.0644124	No	Up
EYU38455	CDS_11700_Unigene_21471	CDS_19081_Unigene_31584	hypothetical protein MIMGU_mgv1a023633mg	119.586	5651.4	47.258	5.56249	0.000492903	Yes	0.0646751	No	Up
XP_012842600	CDS_17462_Unigene_29669	CDS_23727_Unigene_38443	PREDICTED: uncharacterized protein LOC105962815 isoform X1	52.9465	3082.58	58.2207	5.86346	0.000509141	Yes	0.06577	No	Up
XP_011079236	CDS_2674_Unigene_6185	CDS_7868_Unigene_14800	histone-lysine N- H3 lysine-9 specific SUVH1-like	30.1247	2050.67	68.0727	6.08901	0.000587969	Yes	0.0736685	No	Up
XP_012856795	CDS_37569_Unigene_57642	CDS_31409_Unigene_49631	phospholipid-transporting ATPase 4	46.5564	2712.32	58.2588	5.8644	0.000588373	Yes	0.073169	No	Up
XP_011079338	CDS_29367_Unigene_46104	CDS_28508_Unigene_45480	ECERIFERUM 3-like	118.673	5262.52	44.3446	5.47069	0.000592907	Yes	0.0731867	No	Up
XP_012834310	CDS_34870_Unigene_54054	CDS_30942_Unigene_49002	PREDICTED: uncharacterized protein LOC105955154	0.912871	62.4404	68.4	6.09592	0.000643472	Yes	0.0760484	No	Up
XP_011080886	CDS_33390_Unigene_51994	CDS_28060_Unigene_44853	PREDICTED: uncharacterized protein LOC105164037	179.836	7671.4	42.6579	5.41474	0.000647788	Yes	0.0760193	No	Up
XP_011085147	CDS_22845_Unigene_37070	CDS_19720_Unigene_32497	ECERIFERUM 1-like	312.202	15650.6	50.1298	5.6476	0.00065036	Yes	0.0757874	No	Up
XP_012830901	CDS_171_Unigene_412	CDS_4288_Unigene_8350	PAT1 homolog 1	201.744	8521.47	42.2389	5.4005	0.000684173	Yes	0.0775582	No	Up
XP_012842502	CDS_10970_Unigene_20425	CDS_1964_Unigene_4278	PREDICTED: uncharacterized protein LOC105962724	19.1703	1442.7	75.2571	6.23376	0.000745268	Yes	0.082246	No	Up
XP_011081599	CDS_17875_Unigene_30229	CDS_8711_Unigene_16059	PREDICTED: uncharacterized protein LOC105164608	61.1624	2966.47	48.5015	5.59996	0.000807153	Yes	0.0873404	No	Up
XP_011093013	CDS_1370_Unigene_2981	CDS_33993_Unigene_54439	calcium-binding KIC-like	95.8514	3987.42	41.6	5.37851	0.000848949	Yes	0.0906853	No	Up
XP_011092747	CDS_6419_Unigene_12957	CDS_33840_Unigene_54252	ferric reduction oxidase 2-like isoform X1	81.2455	3538.29	43.5506	5.44462	0.000857488	Yes	0.0910139	No	Up
XP_011099231	CDS_10563_Unigene_19828	CDS_7894_Unigene_14828	probable leucine-rich repeat receptor kinase At5g63930	20.996	1455.85	69.3391	6.1156	0.000865291	Yes	0.0912608	No	Up
CDP04650	CDS_14954_Unigene_26099	CDS_21404_Unigene_35105	unnamed protein product	18.2574	1323.3	72.48	6.17951	0.000888914	Yes	0.0931627	No	Up
XP_011088350	CDS_14445_Unigene_25422	CDS_1146_Unigene_2518	mediator of RNA polymerase II transcription subunit 13	76.6812	3348.78	43.6714	5.44862	0.000902559	Yes	0.0940015	No	Up
XP_011086553	CDS_17022_Unigene_29077	CDS_3780_Unigene_7366	methyl- -binding domain-containing 9-like	30.1247	1792.15	59.4909	5.8946	0.000918948	Yes	0.095114	No	Up
XP_011088091	CDS_3716_Unigene_8044	CDS_2105_Unigene_4493	ankyrin repeat domain-containing 6	46.5564	2372.73	50.9647	5.67143	0.000921136	Yes	0.0947519	No	Up
EYU38400	CDS_37712_Unigene_57832	CDS_29933_Unigene_47582	hypothetical protein MIMGU_mgv1a023263mg	272.036	10433	38.3517	5.26122	0.000948719	Yes	0.0963992	No	Up
XP_011095808	CDS_6861_Unigene_13738	CDS_2060_Unigene_4433	cleavage and polyadenylation specificity factor subunit 6	128.715	4750.95	36.9106	5.20596	0.000986887	Yes	0.098476	No	Up
XP_011100914	CDS_7967_Unigene_15768	CDS_17244_Unigene_29023	systemin receptor SR160-like	133.279	4881.3	36.6247	5.19474	0.000989593	Yes	0.0981583	No	Up
XP_011075439	CDS_17018_Unigene_29072	CDS_11325_Unigene_20297	alpha-xylosidase 2	254.691	9389.06	36.8645	5.20416	0.000996497	Yes	0.0982581	No	Up
XP_011098140	CDS_36809_Unigene_56574	CDS_30164_Unigene_47915	PREDICTED: uncharacterized protein LOC105176896	104.98	4048.77	38.567	5.26929	0.00100369	Yes	0.0983851	No	Up
XP_012844644	CDS_4552_Unigene_9773	CDS_3793_Unigene_7385	LRR receptor-like serine threonine- kinase FLS2	83.0713	3384.93	40.7473	5.34863	0.00104869	Yes	0.100433	No	Up
XP_011083993	CDS_38933_Unigene_60054	CDS_15162_Unigene_26075	CBL-interacting serine threonine- kinase 6-like	48.3822	2305.91	47.6604	5.57472	0.00110048	Yes	0.104195	No	Up
XP_012853332	CDS_18878_Unigene_31554	CDS_16039_Unigene_27346	grpE mitochondrial	333.198	12540.7	37.6373	5.23409	0.00110822	Yes	0.103749	No	Up
XP_011077135	CDS_2750_Unigene_6322	CDS_16092_Unigene_27414	translational activator GCN1	192.616	6537.62	33.9412	5.08497	0.00112181	Yes	0.104434	No	Up
XP_011086421	CDS_11326_Unigene_20965	CDS_13453_Unigene_23506	probable xyloglucan endotransglucosylase hydrolase 30	255.604	8907.06	34.8471	5.12297	0.00112304	Yes	0.103968	No	Up
XP_012843590	CDS_33534_Unigene_52164	CDS_21770_Unigene_35648	PREDICTED: transketolase, chloroplastic	417.182	16747.2	40.1435	5.3271	0.00115808	Yes	0.106035	No	Up
XP_011075878	CDS_25399_Unigene_40574	CDS_22852_Unigene_37242	PREDICTED: uncharacterized protein LOC105160266 isoform X1	158.84	5355.63	33.7172	5.07541	0.00116273	Yes	0.105878	No	Up
XP_011098245	CDS_14326_Unigene_25227	CDS_24286_Unigene_39344	malate mitochondrial	283.903	9918.16	34.935	5.1266	0.001166	Yes	0.105599	No	Up
XP_011077208	CDS_6781_Unigene_13621	CDS_204_Unigene_439	scarecrow 14	37.4277	1912.65	51.1024	5.67532	0.00116873	Yes	0.104709	No	Up
ACA64046	CDS_7613_Unigene_15095	CDS_3248_Unigene_6522	cytochrome P450 monooxygenase CS3`H	189.877	6334.96	33.3635	5.0602	0.00116888	Yes	0.104162	No	Up
EYU31736	CDS_33520_Unigene_52144	CDS_31749_Unigene_50159	hypothetical protein MIMGU_mgv1a023294mg	868.14	53096.2	61.1609	5.93454	0.00118941	Yes	0.104869	No	Up
XP_012836951	CDS_34819_Unigene_53989	CDS_27695_Unigene_44302	probable quinone oxidoreductase	120.499	4243.75	35.2182	5.13825	0.00119988	Yes	0.10414	No	Up
AKA27895	CDS_6944_Unigene_13847	CDS_14053_Unigene_24356	WRKY protein	51.1208	2300.43	45	5.49185	0.00125004	Yes	0.106824	No	Up
XP_011070094	CDS_6912_Unigene_13799	CDS_27495_Unigene_44009	probable clathrin assembly At4g32285	40.1663	1952.08	48.6	5.60288	0.00126925	Yes	0.106822	No	Up
XP_011073908	CDS_24304_Unigene_39058	CDS_19095_Unigene_31613	2-isopropylmalate synthase A-like	195.354	6258.28	32.0355	5.0016	0.00129297	Yes	0.10773	No	Up
XP_011085713	CDS_14008_Unigene_24746	CDS_10911_Unigene_19569	cyclic nucleotide-gated ion channel 2-like	27.3861	1496.38	54.64	5.77189	0.00134263	Yes	0.11076	No	Up
XP_011096446	CDS_25865_Unigene_41172	CDS_21861_Unigene_35757	auxin response factor 3	42.9049	1997	46.5447	5.54054	0.00135589	Yes	0.110758	No	Up
XP_011082310	CDS_16090_Unigene_27742	CDS_11939_Unigene_21262	transcription factor HBP-1a-like isoform X2	75.7683	2936.89	38.7614	5.27655	0.00135773	Yes	0.110366	No	Up
XP_012829590	CDS_10387_Unigene_19585	CDS_26431_Unigene_42454	tyrosine- kinase CSK-like	39.2534	1880.88	47.9163	5.58244	0.00136236	Yes	0.110206	No	Up
XP_011093464	CDS_345_Unigene_751	CDS_6720_Unigene_12915	ABC transporter C family member 15	18.2574	1153.5	63.18	5.9814	0.00136781	Yes	0.110112	No	Up
XP_012843823	CDS_16737_Unigene_28678	CDS_14049_Unigene_24353	hydroquinone glucosyltransferase-like	245.562	7663.73	31.2089	4.96389	0.00141525	Yes	0.113383	No	Up
XP_011070569	CDS_37513_Unigene_57559	CDS_31956_Unigene_50422	nuclear pore complex NUP155	83.9841	3107.78	37.0043	5.20962	0.00142742	Yes	0.113811	No	Up
XP_011074258	CDS_16201_Unigene_27944	CDS_15597_Unigene_26673	F-box kelch-repeat SKIP25-like	47.4693	2080.25	43.8231	5.45362	0.00147421	Yes	0.116428	No	Up
XP_012854855	CDS_10755_Unigene_20108	CDS_25357_Unigene_40934	NRT1 PTR FAMILY -like	137.844	4392.73	31.8675	4.99402	0.00148759	Yes	0.11693	No	Up
XP_012844429	CDS_34681_Unigene_53761	CDS_22222_Unigene_36275	probable leucine-rich repeat receptor kinase partial	4.56435	443.655	97.2	6.60288	0.00151423	Yes	0.118465	No	Up
XP_011099341	CDS_28171_Unigene_44457	CDS_3710_Unigene_7265	metal transporter Nramp3	1432.29	128251	89.5426	6.4845	0.00152027	Yes	0.118382	No	Up
XP_012834406	CDS_33755_Unigene_52502	CDS_24280_Unigene_39336	gamma-tubulin complex component 3	32.8634	1603.73	48.8	5.60881	0.00156159	Yes	0.121034	No	Up
XP_011070588	CDS_28478_Unigene_44904	CDS_22833_Unigene_37208	glucan endo-1,3-beta-glucosidase 3	10.9545	811.725	74.1	6.2114	0.00161017	Yes	0.124222	No	Up
XP_011085895	CDS_17728_Unigene_30050	CDS_15019_Unigene_25840	benzyl alcohol O-benzoyltransferase-like	257.43	7531.19	29.2553	4.87063	0.00165595	Yes	0.127165	No	Up
XP_011084110	CDS_21809_Unigene_35683	CDS_14826_Unigene_25545	probable galactinol--sucrose galactosyltransferase 6	1096.36	61696.6	56.2741	5.8144	0.00167825	Yes	0.1277	No	Up
XP_011078470	CDS_26417_Unigene_41964	CDS_26519_Unigene_42597	squalene monooxygenase-like	62.9881	2416.55	38.3652	5.26173	0.00168216	Yes	0.127416	No	Up
XP_011078221	CDS_11378_Unigene_21030	CDS_33222_Unigene_52767	zinc finger CCCH domain-containing 20-like	165.23	4872.54	29.4895	4.88213	0.00168414	Yes	0.126989	No	Up
XP_011070965	CDS_17144_Unigene_29246	CDS_905_Unigene_1987	ERAD-associated E3 ubiquitin- ligase HRD1B-like	161.578	4779.43	29.5797	4.88653	0.00168897	Yes	0.126779	No	Up
Q6TXD2	CDS_7214_Unigene_14382	CDS_4365_Unigene_8521	5MAT2_SALSN ame: Full=Pelargonidin 3-O-(6-caffeoylglucoside) 5-O-(6-O-malonylglucoside) 4 -malonyltransferase ame: Full=Anthocyanin 5-O-glucoside-4 -O-malonyltransferase 2 Short=Ss5 2	104.98	3439.7	32.7652	5.03409	0.00171368	Yes	0.128057	No	Up
XP_011083338	CDS_1132_Unigene_2541	CDS_20145_Unigene_33194	NF-X1-type zinc finger NFXL1	52.9465	2133.93	40.3034	5.33283	0.00171616	Yes	0.12767	No	Up
XP_011072662	CDS_34442_Unigene_53414	CDS_1539_Unigene_3425	PREDICTED: uncharacterized protein LOC105157864 isoform X1	36.5148	1658.5	45.42	5.50526	0.00174273	Yes	0.12907	No	Up
XP_011096981	CDS_1788_Unigene_4228	CDS_33490_Unigene_53446	PREDICTED: uncharacterized protein LOC105176008	60.2495	2315.77	38.4364	5.2644	0.00174862	Yes	0.128366	No	Up
ADD91751	CDS_26507_Unigene_42092	CDS_17956_Unigene_30090	S-adenosylmethionine decarboxylase proenzyme	209.047	5897.88	28.2131	4.81829	0.00177332	Yes	0.129608	No	Up
XP_012835311	CDS_3069_Unigene_6891	CDS_16742_Unigene_28313	L-ascorbate oxidase homolog	56.598	2208.42	39.0194	5.28612	0.00177602	Yes	0.128676	No	Up
XP_011082828	CDS_19736_Unigene_32770	CDS_534_Unigene_1172	leucine-rich repeat receptor-like serine threonine- kinase At1g17230	222.741	6271.42	28.1557	4.81536	0.00178259	Yes	0.128594	No	Up
XP_012837197	CDS_3510_Unigene_7685	CDS_10451_Unigene_18873	trafficking particle complex subunit 2	23.7346	1227.99	51.7385	5.69317	0.0018491	Yes	0.131681	No	Up
XP_011078689	CDS_2442_Unigene_5664	CDS_6046_Unigene_11896	leucine-rich repeat receptor kinase TDR	49.295	1980.56	40.1778	5.32833	0.00186598	Yes	0.132318	No	Up
XP_011078363	CDS_32281_Unigene_50343	CDS_28024_Unigene_44798	probable ADP-ribosylation factor GTPase-activating AGD14	60.2495	2217.18	36.8	5.20163	0.00200665	Yes	0.140499	No	Up
XP_012851188	CDS_5853_Unigene_12054	CDS_1747_Unigene_3731	PREDICTED: uncharacterized protein LOC105970915	43.8178	1786.67	40.775	5.34961	0.00201203	Yes	0.140286	No	Up
XP_011092960	CDS_2079_Unigene_4705	CDS_330_Unigene_732	zeaxanthin chloroplastic-like	23.7346	1191.84	50.2154	5.65006	0.00202503	Yes	0.140021	No	Up
XP_011073498	CDS_36728_Unigene_56482	CDS_31346_Unigene_49544	MATH domain-containing At5g43560-like isoform X1	94.9386	3038.76	32.0077	5.00035	0.00202974	Yes	0.139767	No	Up
XP_011081522	CDS_17556_Unigene_29776	CDS_14370_Unigene_24863	topless-related 1-like isoform X4	30.1247	1386.83	46.0364	5.5247	0.00204065	Yes	0.139366	No	Up
XP_011099175	CDS_39667_Unigene_62026	CDS_4176_Unigene_8061	PREDICTED: uncharacterized protein LOC105177651	3.65148	257.43	70.5	6.13955	0.00204206	Yes	0.138894	No	Up
XP_012851218	CDS_6447_Unigene_13011	CDS_25423_Unigene_41020	SNF1-related kinase catalytic subunit alpha KIN10-like	53.8594	2034.24	37.7695	5.23915	0.0020692	Yes	0.139037	No	Up
XP_011084862	CDS_1214_Unigene_2685	CDS_34361_Unigene_55190	PREDICTED: uncharacterized protein LOC105167009	9.12871	649.599	71.16	6.15299	0.00210115	Yes	0.139496	No	Up
XP_011092622	CDS_3564_Unigene_7777	CDS_6705_Unigene_12891	mechanosensitive ion channel 10-like	40.1663	1658.5	41.2909	5.36775	0.00211594	Yes	0.139921	No	Up
XP_011088780	CDS_29375_Unigene_46112	CDS_13849_Unigene_24081	serine threonine- kinase ATR	14.6059	875.261	59.925	5.90509	0.0021253	Yes	0.139984	No	Up
XP_011071702	CDS_10094_Unigene_19122	CDS_16418_Unigene_27867	cyclic dof factor 3-like	60.2495	2158.03	35.8182	5.16262	0.00218427	Yes	0.142182	No	Up
XP_011073779	CDS_18778_Unigene_31430	CDS_22737_Unigene_37057	PREDICTED: uncharacterized protein LOC105158654 isoform X1	35.602	1508.43	42.3692	5.40495	0.0022108	Yes	0.142794	No	Up
XP_012840450	CDS_39892_Unigene_62731	CDS_1613_Unigene_3533	F-box PP2-B10-like	16.4317	926.747	56.4	5.81762	0.00221148	Yes	0.142286	No	Up
XP_011073310	CDS_1328_Unigene_2864	CDS_23233_Unigene_37776	E3 SUMO- ligase pli1 isoform X1	44.7307	1743.95	38.9878	5.28495	0.0022617	Yes	0.144402	No	Up
XP_011083139	CDS_28716_Unigene_45192	CDS_28785_Unigene_45872	callose synthase 3	166.143	4427.79	26.6505	4.73609	0.00227499	Yes	0.144697	No	Up
XP_011093042	CDS_36986_Unigene_56827	CDS_30822_Unigene_48839	PREDICTED: uncharacterized protein LOC105173090	98.5901	2999.33	30.4222	4.92705	0.00230461	Yes	0.146023	No	Up
XP_011094568	CDS_39313_Unigene_61024	CDS_2323_Unigene_4897	UDP-glycosyltransferase 73D1	2.73861	84.3493	30.8	4.94486	0.00231459	Yes	0.145548	No	Up
XP_011099049	CDS_2907_Unigene_6587	CDS_9400_Unigene_17118	auxin transport BIG	18.2574	960.705	52.62	5.71754	0.00239857	Yes	0.148036	No	Up
XP_011098633	CDS_27251_Unigene_43161	CDS_15643_Unigene_26754	granule-bound starch synthase chloroplastic amyloplastic isoform X1	470.129	12940.5	27.5254	4.78269	0.00240959	Yes	0.148168	No	Up
EYU27018	CDS_34674_Unigene_53758	CDS_11758_Unigene_21003	hypothetical protein MIMGU_mgv1a023086mg, partial	442.742	11531.8	26.0462	4.703	0.00257621	Yes	0.156679	No	Up
XP_011081015	CDS_29324_Unigene_46047	CDS_8363_Unigene_15485	acyltransferase chloroplastic	109.545	3108.87	28.38	4.8268	0.00261291	Yes	0.15719	No	Up
XP_011092319	CDS_31493_Unigene_49130	CDS_23997_Unigene_38880	PREDICTED: uncharacterized protein At5g49945-like	261.994	6260.47	23.8955	4.57867	0.00267353	Yes	0.159683	No	Up
EYU17609	CDS_12358_Unigene_22434	CDS_11829_Unigene_21108	hypothetical protein MIMGU_mgv1a007197mg	6.3901	425.033	66.5143	6.05559	0.00267802	Yes	0.15938	No	Up
XP_011093739	CDS_11519_Unigene_21227	CDS_2536_Unigene_5236	PREDICTED: uncharacterized protein LOC105173627 isoform X1	125.063	3386.02	27.0745	4.75886	0.00270066	Yes	0.160156	No	Up
XP_011100785	CDS_36637_Unigene_56383	CDS_30895_Unigene_48945	serine threonine- phosphatase 4 regulatory subunit 3-like	68.4653	2179.94	31.84	4.99277	0.00278311	Yes	0.163302	No	Up
XP_011099738	CDS_13693_Unigene_24275	CDS_1251_Unigene_2859	enoyl- hydratase peroxisomal	62.0752	2033.15	32.7529	5.03355	0.00279885	Yes	0.163077	No	Up
XP_011070505	CDS_8265_Unigene_16215	CDS_7505_Unigene_14136	NRT1 PTR FAMILY -like	201.744	4783.81	23.7122	4.56756	0.00288437	Yes	0.165742	No	Up
XP_011091914	CDS_2672_Unigene_6178	CDS_33393_Unigene_53115	vinorine synthase-like	15.5188	815.011	52.5176	5.71473	0.00288504	Yes	0.165211	No	Up
XP_011075974	CDS_11895_Unigene_21793	CDS_12149_Unigene_21564	membrane of ER body	104.067	2899.64	27.8632	4.80029	0.00289322	Yes	0.164548	No	Up
XP_011092107	CDS_37727_Unigene_57850	CDS_31985_Unigene_50454	topless-related 3-like	329.546	7704.27	23.3784	4.5471	0.00289415	Yes	0.164041	No	Up
XP_011070522	CDS_18195_Unigene_30653	CDS_20538_Unigene_33810	serine threonine- kinase BRI1-like 2	27.3861	1155.69	42.2	5.39917	0.0029122	Yes	0.164505	No	Up
XP_011086837	CDS_11400_Unigene_21067	CDS_1743_Unigene_3727	glucose-6-phosphate 1- chloroplastic-like	250.127	5746.71	22.9752	4.522	0.00294701	Yes	0.165909	No	Up
XP_012843865	CDS_8784_Unigene_17116	CDS_7452_Unigene_14065	PREDICTED: uncharacterized protein LOC105963920 isoform X1	24.6475	1076.82	43.6889	5.44919	0.00295134	Yes	0.165593	No	Up
XP_011088662	CDS_31970_Unigene_49827	CDS_25839_Unigene_41603	rop guanine nucleotide exchange factor 1	79.4198	2361.78	29.7379	4.89423	0.00299521	Yes	0.16693	No	Up
XP_011091282	CDS_38563_Unigene_59131	CDS_1915_Unigene_4162	phosphate transporter PHO1	20.0832	943.178	46.9636	5.55347	0.00300386	Yes	0.166855	No	Up
XP_011091213	CDS_39588_Unigene_61851	CDS_7570_Unigene_14275	RING-H2 finger ATL16	5.47723	318.775	58.2	5.86295	0.00311342	Yes	0.172365	No	Up
XP_011085673	CDS_27386_Unigene_43349	CDS_33874_Unigene_54289	PREDICTED: uncharacterized protein LOC105167598	258.342	5790.52	22.4141	4.48634	0.00312883	Yes	0.172075	No	Up
XP_011090413	CDS_22349_Unigene_36438	CDS_19724_Unigene_32504	aldehyde dehydrogenase family 3 member F1	90.3742	2538.15	28.0848	4.81172	0.00318365	Yes	0.174514	No	Up
XP_011083517	CDS_37739_Unigene_57863	CDS_31572_Unigene_49878	5 -3 exoribonuclease 3 isoform X5	151.537	3677.41	24.2675	4.60095	0.00324818	Yes	0.176311	No	Up
XP_011098304	CDS_35265_Unigene_54578	CDS_29187_Unigene_46455	SPA1-RELATED 4-like isoform X3	60.2495	1896.22	31.4727	4.97603	0.00324909	Yes	0.175789	No	Up
XP_011077889	CDS_13089_Unigene_23433	CDS_21126_Unigene_34721	serine threonine- kinase D6PKL1-like	38.3406	1390.12	36.2571	5.18019	0.00325557	Yes	0.175569	No	Up
XP_011081726	CDS_16563_Unigene_28419	CDS_32131_Unigene_50683	PREDICTED: LOW QUALITY PROTEIN: uncharacterized protein LOC105164705	156.101	3731.09	23.9018	4.57904	0.00332694	Yes	0.178839	No	Up
Q2KNL6	CDS_5098_Unigene_10788	CDS_5958_Unigene_11766	GEDH1_OCIBA ame: Full=Geraniol dehydrogenase 1 Short= 1	628.968	15804	25.1269	4.65116	0.00336372	Yes	0.180235	No	Up
XP_011098011	CDS_32029_Unigene_49901	CDS_24093_Unigene_39049	sporulation-specific 15	34.6891	1277.29	36.8211	5.20246	0.0034126	Yes	0.181686	No	Up
XP_011094291	CDS_10877_Unigene_20300	CDS_17343_Unigene_29157	transcription initiation factor TFIID subunit 2 isoform X1	103.154	2694.79	26.1239	4.7073	0.00354919	Yes	0.186573	No	Up
XP_011099924	CDS_18326_Unigene_30839	CDS_10222_Unigene_18451	uncharacterized oxidoreductase At4g09670-like	115.935	2925.93	25.2378	4.65751	0.0035839	Yes	0.187217	No	Up
XP_011081718	CDS_17330_Unigene_29480	CDS_13639_Unigene_23781	clathrin interactor EPSIN 1 isoform X1	140.582	3350.97	23.8364	4.57509	0.00364715	Yes	0.189334	No	Up
XP_011077604	CDS_11907_Unigene_21810	CDS_17997_Unigene_30145	fructose-1,6- chloroplastic	944.821	25968.6	27.4852	4.78058	0.00365022	Yes	0.188904	No	Up
XP_011091420	CDS_23182_Unigene_37501	CDS_23532_Unigene_38225	PREDICTED: uncharacterized protein LOC105171868	429.049	9241.17	21.5387	4.42886	0.00371386	Yes	0.191603	No	Up
XP_011079504	CDS_21223_Unigene_34825	CDS_17696_Unigene_29687	probable phosphatase 2C 49	17.3445	796.389	45.9158	5.52092	0.00371992	Yes	0.191323	No	Up
XP_011101653	CDS_25181_Unigene_40282	CDS_10395_Unigene_18766	rab3 GTPase-activating catalytic subunit isoform X3	67.5524	1961.94	29.0432	4.86013	0.00372448	Yes	0.190968	No	Up
XP_011097233	CDS_19283_Unigene_32161	CDS_14453_Unigene_24982	PREDICTED: uncharacterized protein ycf36	829.8	21216.6	25.5683	4.67629	0.00381291	Yes	0.193715	No	Up
XP_011080785	CDS_25950_Unigene_41273	CDS_19477_Unigene_32158	asparagine synthetase [glutamine-hydrolyzing]	873.617	22607.8	25.8784	4.69367	0.00384759	Yes	0.194882	No	Up
XP_011093497	CDS_12397_Unigene_22490	CDS_7719_Unigene_14556	PREDICTED: uncharacterized protein At5g05190	47.4693	1510.62	31.8231	4.992	0.00391057	Yes	0.197472	No	Up
XP_011075998	CDS_19073_Unigene_31857	CDS_15043_Unigene_25879	sec-independent translocase chloroplastic	248.301	5114.63	20.5985	4.36447	0.00394128	Yes	0.197824	No	Up
XP_011101302	CDS_7553_Unigene_14991	CDS_4333_Unigene_8462	cell division cycle 48 homolog	33.7762	1188.56	35.1892	5.13706	0.00399139	Yes	0.19914	No	Up
XP_011084559	CDS_12714_Unigene_22948	CDS_4542_Unigene_8875	GRF1-interacting factor 2-like	54.7723	1654.12	30.2	4.91648	0.00400647	Yes	0.199295	No	Up
XP_012830110	CDS_1082_Unigene_2435	CDS_7536_Unigene_14193	PREDICTED: uncharacterized protein LOC105951259 isoform X1	59.3366	1742.85	29.3723	4.87638	0.00404648	Yes	0.200091	No	Up
XP_011082112	CDS_28377_Unigene_44758	CDS_29429_Unigene_46797	DDB1- and CUL4-associated factor homolog 1	251.04	5101.49	20.3215	4.34493	0.00407535	Yes	0.200329	No	Up
XP_011092586	CDS_5465_Unigene_11422	CDS_865_Unigene_1944	4-coumarate-- ligase-like 6	32.8634	1154.6	35.1333	5.13477	0.0041208	Yes	0.200787	No	Up
XP_011072113	CDS_21840_Unigene_35729	CDS_8451_Unigene_15652	adenylosuccinate lyase-like	154.275	3446.27	22.3385	4.48146	0.00413617	Yes	0.200948	No	Up
XP_011070024	CDS_5635_Unigene_11702	CDS_33503_Unigene_53459	PREDICTED: uncharacterized protein LOC105155775	71.2039	1959.75	27.5231	4.78257	0.00417162	Yes	0.201495	No	Up
XP_011082968	CDS_25775_Unigene_41039	CDS_1710_Unigene_3681	cytochrome P450 CYP72A219-like	455.523	9347.43	20.5202	4.35898	0.00419233	Yes	0.201911	No	Up
XP_011079595	CDS_22436_Unigene_36554	CDS_15417_Unigene_26460	kynurenine--oxoglutarate transaminase 1-like	7.30297	358.211	49.05	5.61618	0.00422767	Yes	0.201862	No	Up
XP_011083594	CDS_4396_Unigene_9500	CDS_6163_Unigene_12064	lysine-specific histone demethylase 1 homolog 3	125.976	2929.22	23.2522	4.53929	0.00429943	Yes	0.203539	No	Up
XP_011090966	CDS_6607_Unigene_13288	CDS_1679_Unigene_3640	translocase of chloroplast chloroplastic-like	121.412	2850.35	23.4767	4.55316	0.00429987	Yes	0.202983	No	Up
XP_011073420	CDS_8645_Unigene_16871	CDS_16972_Unigene_28640	topless-related 4	48.3822	1476.66	30.5208	4.93172	0.00433553	Yes	0.203514	No	Up
XP_011092184	CDS_17479_Unigene_29691	CDS_32323_Unigene_50908	GDSL esterase lipase At1g09390	6.3901	289.198	45.2571	5.50007	0.00437762	Yes	0.204912	No	Up
XP_011099347	CDS_15017_Unigene_26180	CDS_19429_Unigene_32086	xyloglucan galactosyltransferase KATAMARI1 homolog	130.541	2964.27	22.7077	4.50511	0.00449032	Yes	0.209013	No	Up
XP_011088392	CDS_21479_Unigene_35242	CDS_21708_Unigene_35557	BTB POZ domain-containing At3g05675-like	187.139	3861.44	20.6341	4.36696	0.00456352	Yes	0.211829	No	Up
XP_011083501	CDS_10583_Unigene_19851	CDS_25838_Unigene_41601	IQ-DOMAIN 32	157.014	3371.78	21.4744	4.42455	0.00460251	Yes	0.213045	No	Up
XP_011081033	CDS_36932_Unigene_56752	CDS_31881_Unigene_50336	PREDICTED: transportin-1-like	125.976	2854.73	22.6609	4.50213	0.00464521	Yes	0.214426	No	Up
BAA19659	CDS_2128_Unigene_4803	CDS_32528_Unigene_51218	flavonoid 3-O-glucosyltransferase	53.8594	1553.34	28.8407	4.85003	0.0046454	Yes	0.213842	No	Up
XP_011079088	CDS_21383_Unigene_35067	CDS_19759_Unigene_32560	PREDICTED: uncharacterized protein LOC105162695	293.944	5469.56	18.6075	4.21781	0.00495189	Yes	0.224234	No	Up
XP_012838395	CDS_19817_Unigene_32873	CDS_13259_Unigene_23205	sn1-specific diacylglycerol lipase alpha-like	16.4317	681.367	41.4667	5.37388	0.00498969	Yes	0.225334	No	Up
XP_011080784	CDS_15117_Unigene_26294	CDS_17870_Unigene_29951	pentatricopeptide repeat-containing chloroplastic	113.196	2561.15	22.6258	4.4999	0.005067	Yes	0.226372	No	Up
XP_004135090	CDS_4053_Unigene_8849	CDS_15133_Unigene_26020	3-ketoacyl- synthase 6	5.47723	158.84	29	4.85798	0.00518809	Yes	0.231161	No	Up
XP_011076115	CDS_2069_Unigene_4689	CDS_2267_Unigene_4800	probable receptor kinase At5g24010	86.7227	2090.11	24.1011	4.59102	0.00521561	Yes	0.231768	No	Up
XP_011101915	CDS_14447_Unigene_25425	CDS_12967_Unigene_22774	F-box SKP2A-like	106.806	2426.41	22.7179	4.50576	0.00524066	Yes	0.232262	No	Up
XP_011070862	CDS_37555_Unigene_57627	CDS_26337_Unigene_42289	phospholipid-transporting ATPase 9	103.154	2357.4	22.8531	4.51432	0.00529433	Yes	0.234018	No	Up
XP_011070196	CDS_29619_Unigene_46434	CDS_15365_Unigene_26382	TRANSPARENT TESTA 12-like	261.081	4787.1	18.3357	4.19658	0.00533469	Yes	0.234557	No	Up
EYU21187	CDS_18527_Unigene_31095	CDS_7307_Unigene_13846	hypothetical protein MIMGU_mgv1a005199mg	9.12871	387.788	42.48	5.40871	0.00539483	Yes	0.236578	No	Up
XP_011076071	CDS_15799_Unigene_27323	CDS_19039_Unigene_31551	ATP-dependent RNA helicase DHX36	46.5564	1328.77	28.5412	4.83497	0.00540426	Yes	0.23575	No	Up
XP_011090607	CDS_2159_Unigene_4874	CDS_1861_Unigene_4002	E3 ubiquitin- ligase RKP	148.798	3069.44	20.6282	4.36655	0.00541521	Yes	0.235611	No	Up
XP_011076067	CDS_4145_Unigene_9051	CDS_33640_Unigene_53622	PREDICTED: uncharacterized protein LOC105160403	149.711	3074.91	20.539	4.3603	0.00546043	Yes	0.236345	No	Up
XP_012840572	CDS_28074_Unigene_44328	CDS_18588_Unigene_30893	eukaryotic translation initiation factor 3 subunit M	377.929	6750.13	17.8609	4.15873	0.00546832	Yes	0.235463	No	Up
XP_011088614	CDS_2295_Unigene_5210	CDS_4605_Unigene_8971	probable BOI-related E3 ubiquitin- ligase 2	5.47723	142.408	26	4.70044	0.00550411	Yes	0.236393	No	Up
XP_011070386	CDS_4904_Unigene_10444	CDS_1145_Unigene_2517	PREDICTED: uncharacterized protein LOC105156053	90.3742	2105.45	23.297	4.54207	0.00556793	Yes	0.237908	No	Up
XP_011078272	CDS_18426_Unigene_30963	CDS_6108_Unigene_11986	sugar transport 14-like	285.729	5087.25	17.8045	4.15417	0.00559941	Yes	0.238641	No	Up
XP_012832418	CDS_39247_Unigene_60906	CDS_4276_Unigene_8314	homocysteine S-methyltransferase 2	168.881	3327.96	19.7059	4.30056	0.00564628	Yes	0.240025	No	Up
XP_011088487	CDS_13103_Unigene_23456	CDS_15315_Unigene_26309	fructose-bisphosphate aldolase chloroplastic	3942.69	205159	52.0354	5.70142	0.00566173	Yes	0.240069	No	Up
AET80382	CDS_8375_Unigene_16413	CDS_26064_Unigene_41927	beta-tubulin partial	115.022	2494.33	21.6857	4.43867	0.0056704	Yes	0.239826	No	Up
XP_011099355	CDS_2180_Unigene_4923	CDS_4472_Unigene_8753	LOB domain-containing 37-like	73.0297	1789.96	24.51	4.6153	0.00572721	Yes	0.239795	No	Up
XP_012834804	CDS_27660_Unigene_43742	CDS_11903_Unigene_21205	PREDICTED: uncharacterized protein LOC105955596	33.7762	1041.77	30.8432	4.94688	0.00581923	Yes	0.243037	No	Up
XP_011073914	CDS_13460_Unigene_23943	CDS_2596_Unigene_5304	chitinase 1	1286.24	29593.4	23.0078	4.52405	0.00583536	Yes	0.243101	No	Up
XP_012071439	CDS_2966_Unigene_6700	CDS_12382_Unigene_21943	PREDICTED: uncharacterized protein LOC105633461	468.303	8227.89	17.5696	4.13501	0.00588016	Yes	0.244357	No	Up
XP_011082285	CDS_29754_Unigene_46617	CDS_17582_Unigene_29497	serine--tRNA mitochondrial isoform X1	146.059	2925.93	20.0325	4.32427	0.00599007	Yes	0.247689	No	Up
XP_011096255	CDS_12215_Unigene_22230	CDS_32823_Unigene_51899	bifunctional epoxide hydrolase 2-like	230.956	4139.69	17.9241	4.16383	0.00605197	Yes	0.247182	No	Up
XP_011097360	CDS_28208_Unigene_44498	CDS_1592_Unigene_3503	G-type lectin S-receptor-like serine threonine- kinase At1g34300	89.4614	2024.38	22.6286	4.50007	0.00610891	Yes	0.248897	No	Up
XP_012841478	CDS_33398_Unigene_52001	CDS_5632_Unigene_11109	PREDICTED: uncharacterized protein LOC105961762	136.018	2752.85	20.2389	4.33906	0.00612212	Yes	0.248221	No	Up
XP_011096866	CDS_10134_Unigene_19201	CDS_8743_Unigene_16119	LRR receptor-like serine threonine- kinase GSO1	50.2079	1337.54	26.64	4.73552	0.00614677	Yes	0.248014	No	Up
XP_011094505	CDS_29869_Unigene_46776	CDS_30562_Unigene_48469	PREDICTED: uncharacterized protein LOC105174183	51.1208	1348.49	26.3786	4.72129	0.00622567	Yes	0.249386	No	Up
XP_012845174	CDS_27410_Unigene_43380	CDS_22057_Unigene_36048	aspartic ase 1 isoform X1	38.3406	1100.92	28.7143	4.8437	0.00630363	Yes	0.251301	No	Up
XP_011081377	CDS_1501_Unigene_3243	CDS_5527_Unigene_10889	cytochrome P450 76C1-like	12.7802	489.664	38.3143	5.25981	0.00635066	Yes	0.25197	No	Up
XP_011072809	CDS_31512_Unigene_49142	CDS_29276_Unigene_46576	formin 20 isoform X1	85.8099	1936.75	22.5702	4.49635	0.0063638	Yes	0.251892	No	Up
XP_011093142	CDS_23706_Unigene_38189	CDS_17933_Unigene_30047	acyl-coenzyme A thioesterase 8-like	72.1168	1705.61	23.6506	4.56381	0.00640608	Yes	0.252964	No	Up
XP_011086191	CDS_9457_Unigene_18190	CDS_3235_Unigene_6508	5 -adenylylsulfate reductase chloroplastic-like	797.849	14978	18.773	4.23059	0.00643424	Yes	0.253476	No	Up
XP_012841462	CDS_28647_Unigene_45090	CDS_17851_Unigene_29914	NEDD8-activating enzyme E1 regulatory subunit	83.9841	1895.12	22.5652	4.49603	0.00647843	Yes	0.254615	No	Up
XP_011086216	CDS_20448_Unigene_33704	CDS_1319_Unigene_3034	E3 ubiquitin- ligase COP1-like	427.224	7121.49	16.6692	4.05912	0.00649873	Yes	0.254811	No	Up
XP_012834047	CDS_8163_Unigene_16055	CDS_16250_Unigene_27648	guanine nucleotide-binding subunit beta	669.134	11873.5	17.7446	4.14931	0.00653524	Yes	0.253854	No	Up
XP_011078587	CDS_11567_Unigene_21286	CDS_34257_Unigene_55070	adenylate kinase chloroplastic isoform X1	375.19	6152.02	16.3971	4.03537	0.0066774	Yes	0.256388	No	Up
XP_011078265	CDS_11999_Unigene_21956	CDS_18014_Unigene_30169	PREDICTED: uncharacterized protein LOC105162059	118.673	2409.98	20.3077	4.34395	0.00670329	Yes	0.25679	No	Up
XP_011084485	CDS_18060_Unigene_30479	CDS_7313_Unigene_13851	probable dihydrofolate synthetase	17.3445	618.926	35.6842	5.15721	0.00672709	Yes	0.257111	No	Up
XP_011086542	CDS_32387_Unigene_50467	CDS_19232_Unigene_31811	potassium transporter 6-like isoform X2	20.0832	693.417	34.5273	5.10966	0.00673508	Yes	0.256827	No	Up
XP_011069519	CDS_121_Unigene_290	CDS_20936_Unigene_34428	LRR receptor-like serine threonine- kinase ERECTA	559.59	9415.35	16.8254	4.07257	0.00676862	Yes	0.25693	No	Up
XP_012828041	CDS_21986_Unigene_35959	CDS_11393_Unigene_20427	zeatin O-glucosyltransferase-like	52.0336	1323.3	25.4316	4.66855	0.00678232	Yes	0.256865	No	Up
XP_012832579	CDS_26986_Unigene_42746	CDS_21700_Unigene_35542	MATE efflux family 5-like isoform X2	85.8099	1892.93	22.0596	4.46333	0.00679407	Yes	0.256146	No	Up
BAE06271	CDS_23165_Unigene_37484	CDS_13635_Unigene_23774	cyclin A	23.7346	775.575	32.6769	5.0302	0.00685467	Yes	0.256688	No	Up
XP_011074531	CDS_37669_Unigene_57771	CDS_31951_Unigene_50416	PREDICTED: uncharacterized protein LOC105159236 isoform X2	34.6891	999.046	28.8	4.848	0.00686791	Yes	0.256033	No	Up
XP_009768512	CDS_2029_Unigene_4617	CDS_12757_Unigene_22451	heat shock 82	387.057	6250.61	16.1491	4.01338	0.00693056	Yes	0.256646	No	Up
XP_011073534	CDS_25256_Unigene_40366	CDS_18355_Unigene_30564	E3 ubiquitin- ligase XBAT34 isoform X2	16.4317	582.777	35.4667	5.14839	0.0069312	Yes	0.256101	No	Up
XP_011088506	CDS_3794_Unigene_8263	CDS_16022_Unigene_27327	PREDICTED: uncharacterized protein LOC105169716 isoform X1	24.6475	792.007	32.1333	5.006	0.00694265	Yes	0.255391	No	Up
XP_011093295	CDS_2090_Unigene_4716	CDS_131_Unigene_324	transcription factor UNE10-like	806.978	14558.5	18.0407	4.17319	0.00695482	Yes	0.255276	No	Up
XP_011091761	CDS_4696_Unigene_10048	CDS_5711_Unigene_11261	elicitor-responsive 3-like	28.299	856.638	30.271	4.91986	0.00722257	Yes	0.262215	No	Up
XP_012833208	CDS_39958_Unigene_62841	CDS_33648_Unigene_53632	indole-3-acetic acid-amido synthetase	10.9545	380.119	34.7	5.11686	0.00746394	Yes	0.269803	No	Up
XP_011081596	CDS_26802_Unigene_42488	CDS_27077_Unigene_43381	copper-transporting ATPase chloroplastic	252.865	4135.31	16.3538	4.03155	0.00748693	Yes	0.270048	No	Up
XP_011083442	CDS_17920_Unigene_30282	CDS_10140_Unigene_18303	ribonuclease P subunit p25	259.255	4193.36	16.1746	4.01566	0.00762186	Yes	0.274321	No	Up
XP_011092457	CDS_32802_Unigene_51099	CDS_30537_Unigene_48433	dynamin-related 3A-like	230.043	3807.77	16.5524	4.04897	0.00764427	Yes	0.274535	No	Up
XP_011075539	CDS_34772_Unigene_53901	CDS_28253_Unigene_45103	ARF guanine-nucleotide exchange factor GNOM	109.545	2164.6	19.76	4.30451	0.00769952	Yes	0.275332	No	Up
XP_011073815	CDS_11814_Unigene_21679	CDS_2316_Unigene_4884	disease resistance At1g50180	427.224	6611.01	15.4744	3.95181	0.00770408	Yes	0.274905	No	Up
XP_011093071	CDS_11009_Unigene_20479	CDS_17610_Unigene_29540	BAG family molecular chaperone regulator 6	72.1168	1596.06	22.1316	4.46804	0.00771315	Yes	0.274641	No	Up
XP_011074768	CDS_1003_Unigene_2296	CDS_4676_Unigene_9093	transmembrane 184 homolog DDB_G0279555-like isoform X1	19.1703	627.69	32.7429	5.03311	0.00773471	Yes	0.274821	No	Up
XP_011085314	CDS_25545_Unigene_40733	CDS_7634_Unigene_14420	probable LRR receptor-like serine threonine- kinase RFK1 isoform X2	76.6812	1666.17	21.7286	4.44152	0.00774138	Yes	0.274473	No	Up
EYU40807	CDS_33458_Unigene_52093	CDS_29989_Unigene_47675	hypothetical protein MIMGU_mgv1a023095mg, partial	6.3901	127.072	19.8857	4.31366	0.00791238	Yes	0.278757	No	Up
XP_012844744	CDS_16269_Unigene_28040	CDS_14889_Unigene_25641	G-type lectin S-receptor-like serine threonine- kinase At1g11330 isoform X1	176.184	3047.53	17.2974	4.11248	0.00804362	Yes	0.281594	No	Up
XP_011087617	CDS_29816_Unigene_46707	CDS_21256_Unigene_34891	ATP-dependent Clp protease ATP-binding subunit clpX- mitochondrial	40.1663	1039.58	25.8818	4.69387	0.00805326	Yes	0.280752	No	Up
XP_011090656	CDS_36779_Unigene_56532	CDS_30460_Unigene_48324	argonaute 10	65.7267	1467.9	22.3333	4.48113	0.00807515	Yes	0.280928	No	Up
XP_011100076	CDS_26810_Unigene_42496	CDS_966_Unigene_2071	S-adenosylmethionine carrier chloroplastic mitochondrial	100.416	1992.61	19.8436	4.3106	0.00812257	Yes	0.281402	No	Up
XP_011092433	CDS_34668_Unigene_53753	CDS_29804_Unigene_47372	PREDICTED: BRCA1-associated protein	10.9545	358.211	32.7	5.03122	0.00812413	Yes	0.280873	No	Up
XP_011077685	CDS_1612_Unigene_3647	CDS_14701_Unigene_25336	spermidine hydroxycinnamoyl transferase-like	35.602	951.942	26.7385	4.74084	0.00821335	Yes	0.281041	No	Up
XP_012856607	CDS_17003_Unigene_29042	CDS_17483_Unigene_29333	linoleate 13S-lipoxygenase 3- chloroplastic-like	77.594	1643.17	21.1765	4.40439	0.00823838	Yes	0.28132	No	Up
AIE89793	CDS_24679_Unigene_39615	CDS_6515_Unigene_12598	SQUAMOSA promoter binding -like partial	261.994	4105.73	15.6711	3.97003	0.00829118	Yes	0.282544	No	Up
XP_012841353	CDS_6330_Unigene_12818	CDS_11856_Unigene_21137	vacuolar amino acid transporter 1	20.0832	614.545	30.6	4.93546	0.0087327	Yes	0.29339	No	Up
XP_011084487	CDS_1724_Unigene_4017	CDS_12489_Unigene_22073	RNA polymerase sigma factor chloroplastic mitochondrial-like	46.5564	1110.78	23.8588	4.57645	0.00883318	Yes	0.296169	No	Up
XP_011083933	CDS_2255_Unigene_5079	CDS_7891_Unigene_14826	PREDICTED: uncharacterized protein LOC105166323	37.4277	956.324	25.5512	4.67532	0.00887865	Yes	0.296501	No	Up
EYU41656	CDS_7025_Unigene_14002	CDS_6338_Unigene_12349	hypothetical protein MIMGU_mgv1a026579mg	18.2574	557.582	30.54	4.93263	0.00900556	Yes	0.298941	No	Up
XP_011091183	CDS_8974_Unigene_17414	CDS_9963_Unigene_18015	1-aminocyclopropane-1-carboxylate oxidase homolog 1-like isoform X1	803.326	12529.7	15.5973	3.96322	0.00906061	Yes	0.300171	No	Up
XP_011069791	CDS_17790_Unigene_30120	CDS_15913_Unigene_27149	zinc finger ZAT10-like	287.554	4281	14.8876	3.89604	0.00913028	Yes	0.300686	No	Up
XP_011092750	CDS_13641_Unigene_24212	CDS_5506_Unigene_10849	transmembrane 45B	7.30297	146.79	20.1	4.32912	0.00928708	Yes	0.304645	No	Up
XP_011085891	CDS_9187_Unigene_17758	CDS_11737_Unigene_20966	pre-mRNA-splicing factor 38B-like	124.15	2216.09	17.85	4.15785	0.00936427	Yes	0.306574	No	Up
XP_011100590	CDS_35137_Unigene_54387	CDS_30967_Unigene_49032	PREDICTED: protein GIGANTEA-like	1516.28	27456.2	18.1076	4.17853	0.00939675	Yes	0.306433	No	Up
XP_011090683	CDS_15939_Unigene_27514	CDS_20046_Unigene_33032	PREDICTED: myosin-9-like	77.594	1565.39	20.1741	4.33443	0.00940694	Yes	0.306167	No	Up
AKA27888	CDS_39756_Unigene_62391	CDS_21181_Unigene_34801	WRKY protein	10.0416	281.529	28.0364	4.80923	0.00944602	Yes	0.306242	No	Up
XP_011070903	CDS_38924_Unigene_60033	CDS_3244_Unigene_6519	cytosolic sulfotransferase 12-like	12.7802	383.406	30	4.90689	0.00948811	Yes	0.307009	No	Up
XP_011088507	CDS_11145_Unigene_20669	CDS_16023_Unigene_27328	PREDICTED: uncharacterized protein LOC105169716 isoform X2	24.6475	690.13	28	4.80735	0.00964997	Yes	0.311039	No	Up
XP_011077758	CDS_27037_Unigene_42805	CDS_32198_Unigene_50769	ubiquitin carboxyl-terminal hydrolase 12-like isoform X1	450.958	6322.91	14.0211	3.80952	0.00971052	Yes	0.311785	No	Up
AKA27885	CDS_22311_Unigene_36390	CDS_16951_Unigene_28607	WRKY protein	247.388	3692.75	14.9269	3.89985	0.00984167	Yes	0.314179	No	Up
EYU28061	CDS_13835_Unigene_24498	CDS_7923_Unigene_14878	hypothetical protein MIMGU_mgv11b014990mg	31.0376	807.343	26.0118	4.70109	0.00988674	Yes	0.314413	No	Up
EYU25220	CDS_26888_Unigene_42622	CDS_23376_Unigene_38023	hypothetical protein MIMGU_mgv1a011390mg	37.4277	913.601	24.4098	4.60939	0.0100214	Yes	0.31809	No	Up
XP_011100361	CDS_14457_Unigene_25434	CDS_10924_Unigene_19594	O-acyltransferase WSD1-like	181.661	2884.31	15.8774	3.9889	0.0100668	Yes	0.318921	No	Up
XP_011091791	CDS_5000_Unigene_10626	CDS_3570_Unigene_7065	pentatricopeptide repeat-containing At4g20740	20.996	593.731	28.2783	4.82162	0.0100763	Yes	0.318618	No	Up
XP_011089706	CDS_12920_Unigene_23189	CDS_4495_Unigene_8801	YTH domain-containing family 1-like	164.317	2668.5	16.24	4.02148	0.0100813	Yes	0.318171	No	Up
XP_011074362	CDS_26492_Unigene_42066	CDS_933_Unigene_2029	interferon-related developmental regulator 1	314.94	4416.83	14.0243	3.80986	0.010326	Yes	0.324666	No	Up
XP_011086520	CDS_39289_Unigene_60984	CDS_34043_Unigene_54507	MLP 423	438.178	5974.56	13.635	3.76924	0.0103499	Yes	0.323586	No	Up
XP_011082632	CDS_10129_Unigene_19186	CDS_32844_Unigene_51928	PREDICTED: ankyrin-2-like	36.5148	886.215	24.27	4.6011	0.0103812	Yes	0.323957	No	Up
XP_012835351	CDS_22976_Unigene_37258	CDS_21150_Unigene_34756	ATP-dependent Clp protease proteolytic subunit-related chloroplastic	1363.83	22365.7	16.3992	4.03555	0.010542	Yes	0.327136	No	Up
XP_011074721	CDS_11645_Unigene_21385	CDS_13826_Unigene_24052	phospholipase D delta-like	36.5148	880.738	24.12	4.59216	0.0105487	Yes	0.32613	No	Up
XP_011082674	CDS_219_Unigene_475	CDS_482_Unigene_1040	3-deoxy-manno-octulosonate mitochondrial	62.9881	1284.96	20.4	4.3505	0.0105916	Yes	0.326848	No	Up
XP_011081107	CDS_2418_Unigene_5576	CDS_14148_Unigene_24505	methylsterol monooxygenase 1-1-like	327.721	4522	13.7983	3.78642	0.0106152	Yes	0.326973	No	Up
XP_012838862	CDS_5384_Unigene_11289	CDS_5940_Unigene_11747	PREDICTED: protein SABRE	97.6772	1766.95	18.0897	4.1771	0.0107119	Yes	0.328734	No	Up
XP_011085751	CDS_2621_Unigene_6050	CDS_4799_Unigene_9326	cyclic dof factor 2-like	17.3445	483.091	27.8526	4.79974	0.0107665	Yes	0.329199	No	Up
XP_011090721	CDS_18101_Unigene_30530	CDS_6905_Unigene_13275	PREDICTED: uncharacterized protein LOC105171345	18.2574	506.096	27.72	4.79286	0.0107875	Yes	0.328634	No	Up
XP_011069529	CDS_18735_Unigene_31370	CDS_7149_Unigene_13645	F-box 7	173.445	2709.04	15.6189	3.96523	0.0108562	Yes	0.330125	No	Up
XP_012849164	CDS_25464_Unigene_40653	CDS_12588_Unigene_22218	CRIB domain-containing RIC10-like	58.4237	1203.89	20.6062	4.36501	0.0108948	Yes	0.330693	No	Up
XP_011084709	CDS_37150_Unigene_57056	CDS_31590_Unigene_49902	type II inositol 1,4,5-trisphosphate 5-phosphatase FRA3	170.707	2670.7	15.6449	3.96762	0.0109156	Yes	0.330723	No	Up
XP_011092161	CDS_28191_Unigene_44486	CDS_24868_Unigene_40224	NHL repeat-containing 2	237.346	3440.79	14.4969	3.85767	0.0109687	Yes	0.330528	No	Up
XP_012836911	CDS_25441_Unigene_40625	CDS_25788_Unigene_41519	D-3-phosphoglycerate dehydrogenase chloroplastic	395.273	5259.23	13.3053	3.73393	0.0110532	Yes	0.331875	No	Up
XP_012848819	CDS_24355_Unigene_39128	CDS_12578_Unigene_22205	TRANSPARENT TESTA 12-like	11.8673	311.106	26.2154	4.71234	0.0111492	Yes	0.333556	No	Up
XP_011083946	CDS_31612_Unigene_49293	CDS_28669_Unigene_45695	transcription factor GTE10-like	93.1128	1679.32	18.0353	4.17275	0.011172	Yes	0.333638	No	Up
AEQ54920	CDS_7145_Unigene_14244	CDS_5713_Unigene_11268	galactinol synthase 2	331.372	4447.51	13.4215	3.74647	0.0113884	Yes	0.33768	No	Up
XP_011074308	CDS_30707_Unigene_48016	CDS_21338_Unigene_35006	probable inactive poly [ADP-ribose] polymerase SRO3	60.2495	1207.18	20.0364	4.32455	0.0114629	Yes	0.338085	No	Up
O04111	CDS_8957_Unigene_17385	CDS_662_Unigene_1540	CHSY_PERFR ame: Full=Chalcone synthase ame: Full=Naringenin-chalcone synthase	73.9425	1399.98	18.9333	4.24286	0.0115279	Yes	0.339401	No	Up
XP_011072520	CDS_22910_Unigene_37160	CDS_1845_Unigene_3968	receptor-like serine threonine- kinase ALE2	23.7346	615.64	25.9385	4.69702	0.0115324	Yes	0.338936	No	Up
XP_011089036	CDS_2963_Unigene_6697	CDS_33200_Unigene_52745	PREDICTED: uncharacterized protein LOC105170116	275.687	3804.48	13.8	3.7866	0.0115388	Yes	0.338525	No	Up
XP_011088787	CDS_9739_Unigene_18571	CDS_3425_Unigene_6823	alpha-L-fucosidase 1	69.3782	1334.25	19.2316	4.26541	0.011558	Yes	0.338494	No	Up
XP_011096395	CDS_36047_Unigene_55554	CDS_17538_Unigene_29413	phosphoinositide phosphatase SAC1 isoform X4	169.794	2603.87	15.3355	3.9388	0.0115755	Yes	0.338412	No	Up
XP_012841971	CDS_35183_Unigene_54454	CDS_31352_Unigene_49554	STRUBBELIG-RECEPTOR FAMILY 8	171.62	2623.59	15.2872	3.93426	0.0115981	Yes	0.338479	No	Up
XP_011086670	CDS_20904_Unigene_34326	CDS_17640_Unigene_29568	PREDICTED: uncharacterized protein LOC105168326	33.7762	802.961	23.773	4.57125	0.0116118	Yes	0.338284	No	Up
XP_011085319	CDS_14221_Unigene_25064	CDS_6534_Unigene_12624	STICHEL-like 4	76.6812	1433.94	18.7	4.22497	0.0116157	Yes	0.337809	No	Up
AJD25221	CDS_6359_Unigene_12867	CDS_32441_Unigene_51062	cytochrome P450 CYP94C54	57.5109	1156.79	20.1143	4.33015	0.011752	Yes	0.339403	No	Up
XP_011089957	CDS_4463_Unigene_9595	CDS_12130_Unigene_21532	PREDICTED: uncharacterized protein LOC105170752	17.3445	458.992	26.4632	4.72591	0.0117674	Yes	0.339259	No	Up
XP_011099832	CDS_10613_Unigene_19893	CDS_1759_Unigene_3743	PREDICTED: LOW QUALITY PROTEIN: uncharacterized protein LOC105178147	183.487	2748.47	14.9791	3.90488	0.011769	Yes	0.33872	No	Up
XP_011084141	CDS_35862_Unigene_55339	CDS_29979_Unigene_47657	transport SEC23-like	469.216	6008.52	12.8054	3.67869	0.0119986	Yes	0.34237	No	Up
AAG43519	CDS_39166_Unigene_60759	CDS_32693_Unigene_51745	AF210699_1granule-bound starch synthase	3342.93	74937.2	22.4166	4.4865	0.0120018	Yes	0.341876	No	Up
XP_012829248	CDS_14178_Unigene_25006	CDS_1558_Unigene_3448	late blight resistance homolog R1A-3	429.049	5496.94	12.8119	3.67941	0.0120031	Yes	0.341331	No	Up
XP_011072950	CDS_2481_Unigene_5744	CDS_33456_Unigene_53408	PREDICTED: uncharacterized protein LOC105158039	14.6059	377.929	25.875	4.69349	0.0120849	Yes	0.341906	No	Up
XP_012843373	CDS_28723_Unigene_45200	CDS_19193_Unigene_31764	callose synthase 7-like	29.2119	707.658	24.225	4.59842	0.0121868	Yes	0.343621	No	Up
XP_011090144	CDS_5386_Unigene_11292	CDS_3302_Unigene_6625	PREDICTED: uncharacterized protein LOC105170911	53.8594	1081.2	20.0746	4.3273	0.0124341	Yes	0.348825	No	Up
XP_011082052	CDS_6266_Unigene_12704	CDS_29684_Unigene_47174	UDP-glycosyltransferase 74F2-like	141.495	2205.13	15.5845	3.96204	0.0124639	Yes	0.349074	No	Up
XP_011100908	CDS_12377_Unigene_22460	CDS_34379_Unigene_55215	iron-sulfur assembly chloroplastic	1198.6	17223.7	14.3698	3.84497	0.0125711	Yes	0.351484	No	Up
XP_012836697	CDS_15273_Unigene_26537	CDS_22509_Unigene_36676	3-phosphoinositide-dependent kinase 2-like	91.2871	1574.15	17.244	4.10802	0.0127667	Yes	0.352811	No	Up
XP_011089575	CDS_14723_Unigene_25815	CDS_12497_Unigene_22086	ubiquitin carboxyl-terminal hydrolase 5	69.3782	1280.58	18.4579	4.20617	0.0128464	Yes	0.354424	No	Up
ACN94267	CDS_11636_Unigene_21373	CDS_14137_Unigene_24479	chloroplast ribulose-1,5-bisphosphate carboxylase oxygenase activase	12377.6	907624	73.3279	6.19629	0.0129685	Yes	0.356611	No	Up
XP_011082558	CDS_22282_Unigene_36361	CDS_9424_Unigene_17165	mitochondrial ribosome-associated GTPase 1	178.01	2577.58	14.48	3.85599	0.0131579	Yes	0.361223	No	Up
XP_011071763	CDS_963_Unigene_2236	CDS_10284_Unigene_18544	lipase-like PAD4	13.6931	326.443	23.84	4.57531	0.013324	Yes	0.365182	No	Up
XP_011089617	CDS_19372_Unigene_32274	CDS_20902_Unigene_34368	serine carboxypeptidase 1	19.1703	468.851	24.4571	4.61218	0.0133934	Yes	0.366482	No	Up
XP_011096814	CDS_398_Unigene_900	CDS_32902_Unigene_52007	stromal 70 kDa heat shock-related chloroplastic-like	56.598	1087.78	19.2194	4.26449	0.0134072	Yes	0.366259	No	Up
XP_011095913	CDS_7904_Unigene_15668	CDS_916_Unigene_2007	oligopeptide transporter 3	3124.76	60853.1	19.4745	4.28351	0.0134297	Yes	0.366272	No	Up
XP_011097195	CDS_23440_Unigene_37876	CDS_4030_Unigene_7771	PREDICTED: uncharacterized protein LOC105176169 isoform X1	61.1624	1148.03	18.7701	4.23037	0.0134453	Yes	0.364908	No	Up
XP_011094992	CDS_2122_Unigene_4790	CDS_29743_Unigene_47259	RNA polymerase II C-terminal domain phosphatase-like 2	102.242	1678.22	16.4143	4.03688	0.0134751	Yes	0.365121	No	Up
XP_011073684	CDS_8697_Unigene_16974	CDS_5848_Unigene_11547	PREDICTED: protein SHORT-ROOT-like	20.996	505	24.0522	4.5881	0.013665	Yes	0.369067	No	Up
XP_011093988	CDS_10630_Unigene_19914	CDS_9425_Unigene_17168	PREDICTED: uncharacterized protein LOC105173804	310.376	3921.69	12.6353	3.65939	0.0138343	Yes	0.371829	No	Up
XP_012836991	CDS_7116_Unigene_14182	CDS_14092_Unigene_24418	PREDICTED: uncharacterized protein LOC105957599	18.2574	432.701	23.7	4.56682	0.0141436	Yes	0.379531	No	Up
AIE15763	CDS_13275_Unigene_23700	CDS_18790_Unigene_31192	Dicer 1	196.267	2704.65	13.7805	3.78455	0.0141977	Yes	0.37915	No	Up
XP_011097190	CDS_31832_Unigene_49605	CDS_26896_Unigene_43123	3-ketoacyl- synthase 6-like	1160.26	15448	13.3142	3.7349	0.0142398	Yes	0.379668	No	Up
XP_011087488	CDS_12204_Unigene_22210	CDS_13304_Unigene_23275	nicotianamine synthase-like	42.9049	867.593	20.2213	4.3378	0.0145663	Yes	0.386517	No	Up
XP_011084078	CDS_38346_Unigene_58697	CDS_9779_Unigene_17722	pyrophosphate-energized vacuolar membrane proton pump-like	226.392	2992.76	13.2194	3.72458	0.0146115	Yes	0.387099	No	Up
XP_011086859	CDS_31147_Unigene_48627	CDS_21622_Unigene_35420	serine threonine- phosphatase PP2A-2 catalytic subunit	577.847	6821.34	11.8047	3.56129	0.0146299	Yes	0.386359	No	Up
XP_011081327	CDS_108_Unigene_248	CDS_8864_Unigene_16320	pentatricopeptide repeat-containing mitochondrial	26.4733	598.113	22.5931	4.49781	0.0146696	Yes	0.386795	No	Up
XP_011077579	CDS_20485_Unigene_33750	CDS_13229_Unigene_23160	PREDICTED: uncharacterized protein LOC105161555	320.418	3932.65	12.2735	3.61748	0.0147409	Yes	0.38806	No	Up
XP_011082569	CDS_18149_Unigene_30596	CDS_29493_Unigene_46904	pre-mRNA-splicing factor 18	178.01	2464.75	13.8462	3.79141	0.0148566	Yes	0.389875	No	Up
XP_011069784	CDS_20432_Unigene_33696	CDS_9308_Unigene_16986	oligopeptide transporter 5-like	196.267	2653.17	13.5181	3.75682	0.0149547	Yes	0.391217	No	Up
XP_011088416	CDS_19914_Unigene_33016	CDS_18963_Unigene_31451	PREDICTED: uncharacterized protein LOC105169651	1148.39	14849.9	12.931	3.69276	0.0149569	Yes	0.39066	No	Up
XP_011078544	CDS_107_Unigene_244	CDS_34087_Unigene_54568	PREDICTED: uncharacterized protein LOC105162245	25.5604	574.013	22.4571	4.4891	0.0149675	Yes	0.390327	No	Up
XP_012858596	CDS_32764_Unigene_51044	CDS_20910_Unigene_34380	beta-hexosaminidase 1	344.152	4148.45	12.0541	3.59145	0.0149696	Yes	0.38977	No	Up
XP_011072894	CDS_9041_Unigene_17506	CDS_3569_Unigene_7063	exocyst complex component EXO70A1-like	36.5148	759.143	20.79	4.37782	0.0151993	Yes	0.392075	No	Up
XP_011070535	CDS_17203_Unigene_29321	CDS_17074_Unigene_28813	mediator of RNA polymerase II transcription subunit 27	105.893	1645.36	15.5379	3.95772	0.0152122	Yes	0.391803	No	Up
XP_011086850	CDS_14166_Unigene_24994	CDS_15371_Unigene_26397	pyruvate dehydrogenase E1 component subunit beta- mitochondrial-like	36.5148	753.666	20.64	4.36737	0.0154575	Yes	0.395673	No	Up
XP_011072682	CDS_34694_Unigene_53784	CDS_27723_Unigene_44339	AT-rich interactive domain-containing 4	408.966	4739.99	11.5902	3.53483	0.0155718	Yes	0.39738	No	Up
XP_011089293	CDS_33933_Unigene_52751	CDS_28890_Unigene_46027	serine threonine- phosphatase 6 regulatory subunit 3-like isoform X2	324.982	3881.16	11.9427	3.57806	0.015766	Yes	0.399279	No	Up
XP_011075360	CDS_26701_Unigene_42371	CDS_4854_Unigene_9444	PREDICTED: uncharacterized protein LOC105159854	83.9841	1362.73	16.2261	4.02024	0.0157802	Yes	0.39903	No	Up
XP_011086679	CDS_3162_Unigene_7072	CDS_4988_Unigene_9680	-tyrosine-phosphatase MKP1-like isoform X2	71.2039	1197.32	16.8154	4.07171	0.0160152	Yes	0.401318	No	Up
XP_002276171	CDS_36975_Unigene_56814	CDS_31211_Unigene_49341	receptor 12	1.82574	15.3362	8.4	3.07039	0.0160203	Yes	0.400844	No	Up
XP_011090242	CDS_10048_Unigene_19047	CDS_30645_Unigene_48586	serrate RNA effector molecule-like	194.442	2553.48	13.1324	3.71506	0.0162519	Yes	0.405422	No	Up
XP_011091175	CDS_12287_Unigene_22324	CDS_26843_Unigene_43043	ethylene receptor 2-like	109.545	1637.69	14.95	3.90207	0.0164569	Yes	0.408093	No	Up
XP_011092411	CDS_18840_Unigene_31521	CDS_11161_Unigene_20016	sulfate transporter -like	399.837	4534.05	11.3397	3.50331	0.0165911	Yes	0.409592	No	Up
XP_011071375	CDS_12244_Unigene_22265	CDS_1736_Unigene_3720	transcription factor bHLH148-like	150.624	2076.96	13.7891	3.78546	0.0166442	Yes	0.409689	No	Up
XP_011088032	CDS_11678_Unigene_21439	CDS_33530_Unigene_53490	serine threonine- kinase TOR	600.669	6694.27	11.1447	3.47828	0.0166871	Yes	0.410139	No	Up
XP_012838589	CDS_36494_Unigene_56156	CDS_28266_Unigene_45126	UPSTREAM OF FLC isoform X2	44.7307	845.684	18.9061	4.24078	0.0166882	Yes	0.409561	No	Up
BAA76429	CDS_12867_Unigene_23128	CDS_26620_Unigene_42716	polyubiquitin	501.166	5567.05	11.1082	3.47355	0.0166974	Yes	0.409184	No	Up
XP_012830284	CDS_23411_Unigene_37827	CDS_22553_Unigene_36750	PREDICTED: uncharacterized protein LOC105951404	70.2911	1166.65	16.5974	4.05289	0.016701	Yes	0.408671	No	Up
XP_011086107	CDS_16786_Unigene_28744	CDS_21062_Unigene_34635	stem-specific TSJT1-like	129.628	1845.83	14.2394	3.83182	0.0167969	Yes	0.410415	No	Up
XP_011096737	CDS_23361_Unigene_37750	CDS_16880_Unigene_28505	probable ribose-5-phosphate isomerase chloroplastic	24.6475	521.432	21.1556	4.40296	0.0168439	Yes	0.410962	No	Up
XP_011091193	CDS_11812_Unigene_21675	CDS_2675_Unigene_5430	1-aminocyclopropane-1-carboxylate oxidase homolog 1-like	113.196	1660.69	14.671	3.87489	0.0169256	Yes	0.412351	No	Up
EYU39895	CDS_34887_Unigene_54061	CDS_30941_Unigene_49002	hypothetical protein MIMGU_mgv1a007607mg	13.6931	265.098	19.36	4.27501	0.0171017	Yes	0.415426	No	Up
XP_011074408	CDS_11151_Unigene_20689	CDS_28_Unigene_61	PREDICTED: cyclin-D3-3-like	209.047	2650.98	12.6812	3.66462	0.0171178	Yes	0.415213	No	Up
XP_011102057	CDS_29622_Unigene_46438	CDS_26281_Unigene_42238	UDP-sugar pyrophosphorylase	205.396	2602.78	12.672	3.66357	0.0173219	Yes	0.419554	No	Up
XP_011102248	CDS_22201_Unigene_36271	CDS_13841_Unigene_24074	PREDICTED: uncharacterized protein LOC105180271	18.2574	380.119	20.82	4.3799	0.0173514	Yes	0.419048	No	Up
XP_011100960	CDS_852_Unigene_2073	CDS_5027_Unigene_9741	salicylate carboxymethyltransferase-like	633.532	6948.41	10.9677	3.45519	0.0173791	Yes	0.419109	No	Up
XP_011080142	CDS_13101_Unigene_23454	CDS_2594_Unigene_5302	LOW PSII ACCUMULATION chloroplastic	381.58	4259.09	11.1617	3.48049	0.0175885	Yes	0.422936	No	Up
AJD25244	CDS_38554_Unigene_59091	CDS_4942_Unigene_9620	cytochrome P450 CYP714A25	8.21584	95.3037	11.6	3.53605	0.0178257	Yes	0.42618	No	Up
XP_011082927	CDS_35748_Unigene_55198	CDS_24109_Unigene_39071	glycine--tRNA ligase mitochondrial-like	992.291	11306.1	11.3939	3.51019	0.0178482	Yes	0.425498	No	Up
XP_011075959	CDS_2083_Unigene_4708	CDS_33988_Unigene_54433	KH domain-containing At4g18375	162.491	2141.6	13.1798	3.72025	0.0179055	Yes	0.426253	No	Up
AEZ55675	CDS_2416_Unigene_5566	CDS_19836_Unigene_32688	mevalonate diphosphate decarboxylase	198.093	2497.61	12.6083	3.6563	0.0179194	Yes	0.425976	No	Up
XP_003635158	CDS_7905_Unigene_15668	CDS_915_Unigene_2007	oligopeptide transporter 3-like	255.604	3048.62	11.9271	3.57618	0.0180161	Yes	0.427665	No	Up
XP_011086380	CDS_13462_Unigene_23945	CDS_26305_Unigene_42255	kinase chloroplastic	197.18	2482.28	12.5889	3.65408	0.0180401	Yes	0.427017	No	Up
XP_011075799	CDS_22614_Unigene_36764	CDS_23581_Unigene_38301	pentatricopeptide repeat-containing At5g27270	94.9386	1414.22	14.8962	3.89687	0.018156	Yes	0.42915	No	Up
XP_011095252	CDS_4709_Unigene_10067	CDS_10968_Unigene_19664	PREDICTED: uncharacterized protein LOC105174762	167.055	2175.55	13.023	3.70298	0.0181745	Yes	0.42898	No	Up
XP_011080978	CDS_21164_Unigene_34750	CDS_34048_Unigene_54512	auxin-induced 22C-like	339.588	3809.96	11.2194	3.48792	0.0182616	Yes	0.430425	No	Up
XP_011089218	CDS_1636_Unigene_3747	CDS_16764_Unigene_28345	cysteine-rich repeat secretory 55-like	19.1703	386.692	20.1714	4.33424	0.0183324	Yes	0.430877	No	Up
CDP06636	CDS_21330_Unigene_34983	CDS_21649_Unigene_35463	unnamed protein product	476.519	5024.81	10.5448	3.39846	0.0190349	Yes	0.441778	No	Up
XP_012850278	CDS_17478_Unigene_29689	CDS_2724_Unigene_5489	cation H(+) antiporter 20	532.204	5582.39	10.4892	3.39083	0.0190432	Yes	0.441358	No	Up
XP_011091270	CDS_19656_Unigene_32660	CDS_3938_Unigene_7629	PREDICTED: uncharacterized protein LOC105171755	33.7762	644.122	19.0703	4.25325	0.019082	Yes	0.441642	No	Up
XP_011077417	CDS_19729_Unigene_32754	CDS_15740_Unigene_26896	exocyst complex component EXO70A1-like	483.822	5080.67	10.5011	3.39247	0.0191768	Yes	0.441994	No	Up
XP_011087900	CDS_15754_Unigene_27245	CDS_31916_Unigene_50378	OBERON 4	518.511	5410.4	10.4345	3.38329	0.0193038	Yes	0.443083	No	Up
XP_011080755	CDS_27394_Unigene_43356	CDS_25509_Unigene_41117	exocyst complex component EXO70B1	255.604	2970.85	11.6229	3.53889	0.01931	Yes	0.442615	No	Up
XP_011073885	CDS_40438_Unigene_64053	CDS_1350_Unigene_3096	ENHANCED DISEASE RESISTANCE 2-like	117.76	1623.45	13.786	3.78514	0.0193796	Yes	0.442993	No	Up
XP_012836915	CDS_17332_Unigene_29481	CDS_17502_Unigene_29363	PREDICTED: uncharacterized protein LOC105957534 isoform X1	286.641	3245.8	11.3236	3.50126	0.0194446	Yes	0.443869	No	Up
XP_011082613	CDS_21370_Unigene_35043	CDS_16135_Unigene_27465	probable folate-biopterin transporter 3	139.669	1843.63	13.2	3.72247	0.0195392	Yes	0.444811	No	Up
XP_011072490	CDS_15582_Unigene_26994	CDS_29416_Unigene_46779	inactive kinase SELMODRAFT_444075	254.691	2947.84	11.5742	3.53284	0.0195659	Yes	0.444811	No	Up
XP_011071203	CDS_22333_Unigene_36415	CDS_19098_Unigene_31616	ATP-dependent RNA helicase dhx8	20.0832	388.883	19.3636	4.27528	0.0196341	Yes	0.445145	No	Up
XP_011100001	CDS_32760_Unigene_51040	CDS_30204_Unigene_47969	ubiquitin carboxyl-terminal hydrolase 17-like	76.6812	1161.17	15.1429	3.92057	0.019846	Yes	0.44873	No	Up
XP_012846950	CDS_23966_Unigene_38576	CDS_26365_Unigene_42331	wall-associated receptor kinase-like 11	46.5564	808.438	17.3647	4.11809	0.0199253	Yes	0.449912	No	Up
XP_011077932	CDS_1699_Unigene_3930	CDS_32346_Unigene_50934	PREDICTED: uncharacterized protein LOC105161815	1650.47	19666.5	11.9157	3.57479	0.0199702	Yes	0.450315	No	Up
XP_011079668	CDS_32354_Unigene_50425	CDS_6133_Unigene_12018	probable GTP diphosphokinase chloroplastic	2622.68	35066.3	13.3704	3.74097	0.0200742	Yes	0.452048	No	Up
XP_011078241	CDS_37797_Unigene_57930	CDS_31810_Unigene_50226	probable serine threonine- kinase vps15	254.691	2918.27	11.4581	3.51829	0.0200979	Yes	0.451972	No	Up
XP_011092084	CDS_6513_Unigene_13105	CDS_33975_Unigene_54413	PREDICTED: uncharacterized protein LOC105172385	28.299	536.768	18.9677	4.24548	0.0201111	Yes	0.451659	No	Up
XP_011084696	CDS_33417_Unigene_52020	CDS_24851_Unigene_40206	V-type proton ATPase subunit H-like	399.837	4194.46	10.4904	3.391	0.0203104	Yes	0.454298	No	Up
XP_011075665	CDS_35809_Unigene_55266	CDS_17255_Unigene_29035	PREDICTED: uncharacterized protein LOC105160095 isoform X2	19.1703	360.401	18.8	4.23266	0.0203681	Yes	0.45498	No	Up
XP_012849263	CDS_20125_Unigene_33267	CDS_34396_Unigene_55236	DNA repair UVH3 isoform X1	114.109	1547.86	13.5648	3.7618	0.0205753	Yes	0.457767	No	Up
XP_011093906	CDS_35599_Unigene_55020	CDS_19439_Unigene_32095	PREDICTED: uncharacterized protein LOC105173735	50.2079	841.302	16.7564	4.06664	0.0206578	Yes	0.457768	No	Up
XP_011074863	CDS_1526_Unigene_3352	CDS_5765_Unigene_11384	kynurenine--oxoglutarate transaminase 1-like	623.491	6317.43	10.1324	3.3409	0.0206769	Yes	0.457583	No	Up
XP_011076286	CDS_4134_Unigene_9029	CDS_9383_Unigene_17093	probable inactive leucine-rich repeat receptor kinase At1g66830	157.927	1980.56	12.541	3.64859	0.0207298	Yes	0.458145	No	Up
EYU38589	CDS_30200_Unigene_47292	CDS_6352_Unigene_12374	hypothetical protein MIMGU_mgv1a004937mg	54.7723	891.692	16.28	4.02503	0.0208971	Yes	0.46123	No	Up
XP_011080765	CDS_1742_Unigene_4095	CDS_3492_Unigene_6920	codeine O-demethylase-like	90.3742	1286.05	14.2303	3.83089	0.0209327	Yes	0.461406	No	Up
XP_011086753	CDS_34112_Unigene_52987	CDS_28882_Unigene_46021	lipoxygenase chloroplastic	646.313	6511.33	10.0746	3.33265	0.020991	Yes	0.46208	No	Up
XP_012575474	CDS_29573_Unigene_46365	CDS_26461_Unigene_42512	zinc finger BED domain-containing RICESLEEPER 2-like	13.6931	217.994	15.92	3.99277	0.0210742	Yes	0.462689	No	Up
XP_011079695	CDS_12925_Unigene_23199	CDS_1179_Unigene_2612	autophagy-related 18a-like	450.045	4573.48	10.1623	3.34515	0.0211625	Yes	0.464015	No	Up
XP_011083055	CDS_34485_Unigene_53487	CDS_28224_Unigene_45084	PHR1-LIKE 1-like	120.499	1591.68	13.2091	3.72346	0.0213013	Yes	0.464614	No	Up
XP_012851054	CDS_15832_Unigene_27355	CDS_11764_Unigene_21012	1-aminocyclopropane-1-carboxylate oxidase homolog 1-like	108.632	1466.8	13.5025	3.75516	0.0214248	Yes	0.466087	No	Up
XP_012857013	CDS_11943_Unigene_21878	CDS_12977_Unigene_22784	probable receptor kinase At1g67000	104.067	1417.51	13.6211	3.76777	0.0214945	Yes	0.466993	No	Up
XP_012857287	CDS_24504_Unigene_39328	CDS_13223_Unigene_23150	zinc finger 8	138.756	1765.86	12.7263	3.66974	0.0215417	Yes	0.46741	No	Up
XP_011088836	CDS_19090_Unigene_31880	CDS_31714_Unigene_50096	PREDICTED: neuroguidin	146.059	1834.87	12.5625	3.65105	0.0216055	Yes	0.468186	No	Up
XP_011092642	CDS_23347_Unigene_37722	CDS_9667_Unigene_17552	PREDICTED: uncharacterized protein LOC105172763	229.131	2608.25	11.3833	3.50884	0.0216321	Yes	0.468153	No	Up
XP_011098535	CDS_34661_Unigene_53745	CDS_22392_Unigene_36515	zinc transporter 5	98.5901	1355.07	13.7444	3.78078	0.0216863	Yes	0.467504	No	Up
AKA27916	CDS_40439_Unigene_64058	CDS_3283_Unigene_6587	WRKY protein	150.624	1875.4	12.4509	3.63818	0.0217102	Yes	0.467414	No	Up
XP_011099533	CDS_4961_Unigene_10560	CDS_15778_Unigene_26954	probable serine threonine- kinase At1g18390 isoform X3	42.9049	730.662	17.0298	4.08999	0.0218396	Yes	0.467182	No	Up
XP_011087182	CDS_18391_Unigene_30921	CDS_12098_Unigene_21487	microtubule-associated TORTIFOLIA1	74.8554	1096.54	14.6488	3.87271	0.0218958	Yes	0.467185	No	Up
XP_011087575	CDS_23265_Unigene_37603	CDS_8678_Unigene_16006	flap endonuclease 1	45.6435	761.334	16.68	4.06005	0.022126	Yes	0.470891	No	Up
XP_011069931	CDS_37465_Unigene_57476	CDS_31284_Unigene_49458	PREDICTED: uncharacterized protein LOC105155708	401.663	4061.91	10.1127	3.3381	0.0222991	Yes	0.473969	No	Up
XP_011099941	CDS_13413_Unigene_23890	CDS_13407_Unigene_23414	DNA repair complementing XP-C cells homolog isoform X1	114.109	1497.47	13.1232	3.71405	0.0223507	Yes	0.474462	No	Up
XP_011077518	CDS_21700_Unigene_35520	CDS_7660_Unigene_14467	probably inactive leucine-rich repeat receptor kinase IMK2	95.8514	1309.06	13.6571	3.77158	0.0223809	Yes	0.474498	No	Up
XP_011091460	CDS_3221_Unigene_7163	CDS_5588_Unigene_11017	heat shock cognate 70 kDa 2-like	642.661	6280.19	9.77216	3.28868	0.0224455	Yes	0.474659	No	Up
XP_011095492	CDS_135_Unigene_357	CDS_32866_Unigene_51959	MO25 At5g47540	43.8178	732.853	16.725	4.06393	0.022484	Yes	0.47487	No	Up
XP_011100078	CDS_17514_Unigene_29731	CDS_17201_Unigene_28950	general transcription factor 3C polypeptide 3 isoform X1	107.719	1427.36	13.2508	3.72801	0.0225561	Yes	0.475792	No	Up
XP_012855653	CDS_12595_Unigene_22774	CDS_1530_Unigene_3410	late blight resistance homolog R1A-10	458.261	4520.9	9.86534	3.30237	0.0226833	Yes	0.476664	No	Up
XP_011075667	CDS_6778_Unigene_13615	CDS_29250_Unigene_46547	PREDICTED: uncharacterized protein LOC105160099 isoform X2	60.2495	923.46	15.3273	3.93803	0.0226836	Yes	0.47607	No	Up
XP_011069575	CDS_13408_Unigene_23879	CDS_12042_Unigene_21405	polyadenylate-binding -interacting 7-like	764.073	7479.7	9.78925	3.2912	0.0227487	Yes	0.476836	No	Up
XP_011072435	CDS_9318_Unigene_17962	CDS_829_Unigene_1890	clavaminate synthase At3g21360	867.227	8578.43	9.89179	3.30623	0.0227555	Yes	0.476379	No	Up
XP_011086928	CDS_18324_Unigene_30837	CDS_13059_Unigene_22899	PREDICTED: uncharacterized protein LOC105168518 isoform X1	106.806	1412.03	13.2205	3.72471	0.022794	Yes	0.476587	No	Up
AJD25202	CDS_11584_Unigene_21308	CDS_34255_Unigene_55067	cytochrome P450 CYP82U4	1121.92	11479.2	10.2317	3.35498	0.022855	Yes	0.476665	No	Up
XP_012851960	CDS_22417_Unigene_36542	CDS_18247_Unigene_30445	probable plastid-lipid-associated chloroplastic isoform X1	1828.48	20620.7	11.2775	3.49537	0.0228682	Yes	0.476345	No	Up
XP_011091024	CDS_26741_Unigene_42429	CDS_25977_Unigene_41816	WD repeat-containing 43	56.598	877.452	15.5032	3.9545	0.023002	Yes	0.477936	No	Up
XP_011092557	CDS_13821_Unigene_24471	CDS_4351_Unigene_8489	O-acyltransferase WSD1-like isoform X2	193.529	2227.04	11.5075	3.52451	0.0230433	Yes	0.478198	No	Up
XP_011091762	CDS_38980_Unigene_60211	CDS_419_Unigene_886	receptor 12	22.8218	400.933	17.568	4.13488	0.0231467	Yes	0.479151	No	Up
XP_012840877	CDS_7461_Unigene_14839	CDS_6259_Unigene_12223	probable inactive receptor kinase RLK902	118.673	1520.48	12.8123	3.67946	0.0231928	Yes	0.478915	No	Up
XP_011080876	CDS_39398_Unigene_61545	CDS_11369_Unigene_20391	cation H(+) antiporter 18-like	9.12871	92.0174	10.08	3.33342	0.0233793	Yes	0.482169	No	Up
XP_011090995	CDS_24208_Unigene_38918	CDS_15256_Unigene_26215	fasciclin-like arabinogalactan 8	1266.15	13031.4	10.2921	3.36347	0.0236178	Yes	0.484092	No	Up
XP_011094477	CDS_39186_Unigene_60793	CDS_1618_Unigene_3539	PREDICTED: uncharacterized protein LOC105174167	83.0713	1141.45	13.7407	3.78038	0.0239708	Yes	0.488325	No	Up
XP_011080175	CDS_20054_Unigene_33194	CDS_13943_Unigene_24199	SULFUR DEFICIENCY-INDUCED 1	324.069	3308.24	10.2085	3.35169	0.0240173	Yes	0.488675	No	Up
XP_011100758	CDS_27910_Unigene_44121	CDS_15943_Unigene_27199	probable serine threonine- kinase DDB_G0282963 isoform X2	300.335	3111.06	10.3587	3.37277	0.0240275	Yes	0.488287	No	Up
XP_011093072	CDS_13652_Unigene_24220	CDS_28029_Unigene_44806	UDP-D-xylose:L-fucose alpha-1,3-D-xylosyltransferase MGP4	15.5188	234.425	15.1059	3.91704	0.0243481	Yes	0.492399	No	Up
XP_012858840	CDS_39982_Unigene_62887	CDS_33994_Unigene_54440	PREDICTED: uncharacterized protein LOC105977981	4376.3	63037.4	14.4043	3.84842	0.024398	Yes	0.492811	No	Up
XP_011096697	CDS_1349_Unigene_2925	CDS_643_Unigene_1498	serine threonine- kinase CCR4	141.495	1703.42	12.0387	3.58961	0.0245041	Yes	0.494353	No	Up
XP_012852457	CDS_22493_Unigene_36633	CDS_17068_Unigene_28804	eukaryotic translation initiation factor 6-2	572.37	5361.11	9.36651	3.22751	0.0246644	Yes	0.496387	No	Up
XP_012844854	CDS_2742_Unigene_6312	CDS_4521_Unigene_8836	G-type lectin S-receptor-like serine threonine- kinase At4g27290	104.98	1348.49	12.8452	3.68316	0.0246893	Yes	0.496288	No	Up
XP_011072268	CDS_3939_Unigene_8587	CDS_2107_Unigene_4495	PREDICTED: uncharacterized protein LOC105157559	79.4198	1087.78	13.6966	3.77574	0.0248545	Yes	0.49721	No	Up
XP_012844295	CDS_24315_Unigene_39067	CDS_25325_Unigene_40890	cinnamoyl- reductase 1-like	292.119	3002.62	10.2788	3.36159	0.024871	Yes	0.496942	No	Up
XP_011093871	CDS_1677_Unigene_3875	CDS_12819_Unigene_22541	ethylene-responsive transcription factor ERF017-like	36.5148	601.399	16.47	4.04177	0.024889	Yes	0.496706	No	Up
XP_011074159	CDS_1711_Unigene_3973	CDS_11343_Unigene_20326	probable beta-D-xylosidase 7	39.2534	639.74	16.2977	4.02659	0.0248951	Yes	0.496235	No	Up
XP_009763373	CDS_329_Unigene_707	CDS_34353_Unigene_55181	aspartic ase PCS1-like	12.7802	159.935	12.5143	3.6455	0.0252695	Yes	0.500703	No	Up
[truncated: 223 more rows]

## Sheet: Downregulated
ID	Control_Seq_ID	Flood_Seq_ID	Sequence_Description	Control_baseMean	Flood_baseMean	FOLD CHANGE FOR DWNREG	foldChange	log2FoldChange	pval	Significance	padj	Significance	Regulation
[truncated: 561 more rows]

[truncated: 2 more sheets: Exclusive_Control, Exclusive_Flood]
