# Supplementary material for: Ocimum metabolomics in response to abiotic stresses: Cold, flood, drought and salinity
Source: PLoS One. 2019 Feb 6;14(2):e0210903. doi: 10.1371/journal.pone.0210903 (PMC6364901; doi:10.1371/journal.pone.0210903)
Supplement: S4 Dataset — (XLSX) [file pone.0210903.s004.xlsx]

## Sheet: Combined
id	CONTROL_CDS_ID	DROUGHT_CDS_ID	Description	Control_baseMean	Drought_baseMean	foldChange	log2FoldChange	pval	Significance	padj	Significance	Regulation
XP_011082867	CDS_38796_Unigene_59782	CDS_6718_Unigene_12765	polyphenol oxidase chloroplastic-like	13775.9	21.3948	0.00155306	-9.33067	6.59231e-10	Yes	1.00078e-05	Yes	Down
XP_006354639	CDS_12756_Unigene_22973	CDS_1445_Unigene_3342	10 kDa chaperonin	7707.39	19.0176	0.00246745	-8.66276	5.3669e-09	Yes	2.71583e-05	Yes	Down
XP_011099029	CDS_10144_Unigene_19218	CDS_32039_Unigene_49003	receptor kinase FERONIA	13.4612	6394.67	475.044	8.89192	3.88544e-09	Yes	2.71583e-05	Yes	Up
XP_011081684	CDS_19399_Unigene_32297	CDS_13123_Unigene_22628	glycine dehydrogenase (decarboxylating) mitochondrial	32537.4	136.689	0.00420097	-7.89506	1.22131e-08	Yes	4.63518e-05	Yes	Down
XP_011098425	CDS_30183_Unigene_47261	CDS_16821_Unigene_27940	PREDICTED: uncharacterized protein LOC105177096 isoform X3	10287.7	38.0352	0.00369714	-8.07937	1.74642e-08	Yes	5.30248e-05	Yes	Down
XP_011080223	CDS_28719_Unigene_45196	CDS_109_Unigene_262	callose synthase 3-like	6101.3	20.2062	0.00331179	-8.23817	2.3607e-08	Yes	5.97297e-05	Yes	Down
XP_011101284	CDS_27569_Unigene_43620	CDS_7216_Unigene_13668	elongation factor chloroplastic	9214.2	38.0352	0.00412789	-7.92038	2.77266e-08	Yes	6.0131e-05	Yes	Down
XP_011070630	CDS_1509_Unigene_3276	CDS_8379_Unigene_15535	auxin efflux carrier component 7-like	23.5571	6209.25	263.582	8.04211	3.24797e-08	Yes	6.16343e-05	Yes	Up
XP_011097480	CDS_24929_Unigene_39944	CDS_5336_Unigene_10313	kinesin KCA2	6604.41	27.3378	0.00413932	-7.91639	4.30897e-08	Yes	7.26827e-05	Yes	Down
XP_011099840	CDS_9290_Unigene_17927	CDS_8563_Unigene_15857	transcription-associated 1-like isoform X4	8071.68	39.2238	0.00485943	-7.685	5.69201e-08	Yes	8.64103e-05	Yes	Down
XP_011088570	CDS_38288_Unigene_58609	CDS_1368_Unigene_3104	dirigent 21-like	30858.2	206.816	0.00670216	-7.22116	8.46118e-08	Yes	0.000107041	Yes	Down
XP_012833351	CDS_12051_Unigene_22012	CDS_30734_Unigene_47226	ATP synthase subunit mitochondrial	40.3837	7565.44	187.339	7.54951	8.17748e-08	Yes	0.000107041	Yes	Up
XP_011078373	CDS_17884_Unigene_30234	CDS_8217_Unigene_15271	phospholipase D alpha 1-like	12412.1	76.0704	0.00612874	-7.35019	1.14192e-07	Yes	0.00013335	Yes	Down
XP_011086200	CDS_35232_Unigene_54532	CDS_5772_Unigene_11331	calcium permeable stress-gated cation channel 1-like	7327.11	45.1668	0.00616434	-7.34184	1.5369e-07	Yes	0.000166655	Yes	Down
XP_011078382	CDS_13185_Unigene_23574	CDS_619_Unigene_1384	probable galactinol--sucrose galactosyltransferase 6	20709.2	167.593	0.00809265	-6.94917	2.47197e-07	Yes	0.00025018	Yes	Down
XP_011083092	CDS_24404_Unigene_39199	CDS_19514_Unigene_31701	PREDICTED: uncharacterized protein LOC105165697	10281	80.8248	0.00786156	-6.99097	3.0225e-07	Yes	0.000286779	Yes	Down
XP_011094724	CDS_8482_Unigene_16602	CDS_16732_Unigene_27822	probable LRR receptor-like serine threonine- kinase At1g67720	36.177	5372.47	148.505	7.21437	3.4911e-07	Yes	0.000311755	Yes	Up
XP_011075655	CDS_2526_Unigene_5868	CDS_2926_Unigene_5955	auxin efflux carrier component 7-like	29.4464	4643.86	157.705	7.30109	4.21432e-07	Yes	0.000355431	Yes	Up
XP_011069870	CDS_2772_Unigene_6354	CDS_1831_Unigene_3945	EIN3-binding F-box 1	81.6086	8874.09	108.74	6.76473	5.66352e-07	Yes	0.000452515	Yes	Up
XP_011080322	CDS_26005_Unigene_41359	CDS_19171_Unigene_31210	chromatin structure-remodeling complex SYD	8520.95	84.3906	0.00990389	-6.65779	7.86632e-07	Yes	0.00056866	Yes	Down
XP_011093542	CDS_37499_Unigene_57541	CDS_1047_Unigene_2281	PREDICTED: dihydroflavonol-4-reductase-like	5588.93	47.544	0.00850682	-6.87717	7.81342e-07	Yes	0.00056866	Yes	Down
XP_011074957	CDS_27961_Unigene_44185	CDS_1708_Unigene_3754	multiple C2 and transmembrane domain-containing 2-like	5095.91	43.9782	0.00863009	-6.85641	1.00465e-06	Yes	0.000686686	Yes	Down
XP_011081428	CDS_2552_Unigene_5919	CDS_33897_Unigene_51559	pre-mRNA-processing-splicing factor 8	148.915	13583.3	91.2154	6.51121	1.04037e-06	Yes	0.000686686	Yes	Up
XP_011075207	CDS_21712_Unigene_35539	CDS_25931_Unigene_40528	neutral alpha-glucosidase C	29.4464	4023.41	136.635	7.09418	1.15031e-06	Yes	0.000727617	Yes	Up
XP_011083298	CDS_16276_Unigene_28044	CDS_1099_Unigene_2369	polyphenol oxidase chloroplastic-like	16.8265	3143.85	186.839	7.54565	1.24362e-06	Yes	0.000755175	Yes	Up
XP_011102156	CDS_24654_Unigene_39576	CDS_3257_Unigene_6525	GDSL esterase lipase At4g18970-like	8346.8	98.6538	0.0118194	-6.4027	1.56196e-06	Yes	0.000872614	Yes	Down
XP_012833123	CDS_14477_Unigene_25466	CDS_3924_Unigene_7860	chitinase 5-like	16130.7	199.685	0.0123791	-6.33595	1.55292e-06	Yes	0.000872614	Yes	Down
XP_011093699	CDS_12160_Unigene_22167	CDS_5473_Unigene_10626	serine acetyltransferase 5-like	20.1918	3267.46	161.821	7.33825	1.60946e-06	Yes	0.000872614	Yes	Up
XP_011088320	CDS_16680_Unigene_28588	CDS_453_Unigene_987	PREDICTED: LOW QUALITY PROTEIN: uncharacterized protein LOC105169593	3472.15	23.772	0.00684647	-7.19042	1.84336e-06	Yes	0.000932802	Yes	Down
XP_011100202	CDS_11795_Unigene_21642	CDS_31304_Unigene_48052	phosphoenolpyruvate carboxylase 1-like	96.7525	7910.13	81.7563	6.35326	1.81976e-06	Yes	0.000932802	Yes	Up
XP_011093739	CDS_11519_Unigene_21227	CDS_4473_Unigene_8694	PREDICTED: uncharacterized protein LOC105173627 isoform X1	115.262	9026.23	78.3107	6.29114	1.99046e-06	Yes	0.000974746	Yes	Up
XP_011085509	CDS_39984_Unigene_62893	CDS_5022_Unigene_9733	L-ascorbate oxidase homolog	6546.36	80.8248	0.0123465	-6.33975	2.33741e-06	Yes	0.00110888	Yes	Down
XP_011098436	CDS_38248_Unigene_58564	CDS_10575_Unigene_18806	galactinol--sucrose galactosyltransferase	12405.4	180.667	0.0145636	-6.10148	3.2069e-06	Yes	0.00147527	Yes	Down
XP_011074229	CDS_19272_Unigene_32146	CDS_799_Unigene_1838	BEACH domain-containing lvsC	2884.91	19.0176	0.0065921	-7.24505	3.67525e-06	Yes	0.00161891	Yes	Down
XP_011086103	CDS_30172_Unigene_47248	CDS_26345_Unigene_41125	PREDICTED: uncharacterized protein LOC105167921	2486.96	13.0746	0.00525726	-7.57147	3.73241e-06	Yes	0.00161891	Yes	Down
XP_011073451	CDS_10862_Unigene_20283	CDS_12714_Unigene_22024	calcium-dependent kinase 3-like	4611.31	57.0528	0.0123724	-6.33673	4.56547e-06	Yes	0.0018239	Yes	Down
XP_011074434	CDS_23117_Unigene_37418	CDS_6852_Unigene_13018	UDP-glucose 4-epimerase GEPI48	9390.04	148.575	0.0158226	-5.98187	4.51334e-06	Yes	0.0018239	Yes	Down
XP_011099838	CDS_9291_Unigene_17928	CDS_17041_Unigene_28274	transcription-associated 1-like isoform X2	74.878	5440.22	72.6544	6.18298	4.52355e-06	Yes	0.0018239	Yes	Up
XP_012845929	CDS_24626_Unigene_39517	CDS_5751_Unigene_11263	probable LRR receptor-like serine threonine- kinase At3g47570	3112.91	24.9606	0.00801842	-6.96247	4.69299e-06	Yes	0.00182677	Yes	Down
XP_011078374	CDS_39812_Unigene_62628	CDS_11064_Unigene_19503	EIN3-binding F-box 1-like	4111.56	48.7326	0.0118526	-6.39866	5.58037e-06	Yes	0.00208755	Yes	Down
XP_012856635	CDS_39990_Unigene_62907	CDS_5524_Unigene_10723	NUCLEAR FUSION DEFECTIVE 4	3800.27	41.601	0.0109469	-6.51334	5.63795e-06	Yes	0.00208755	Yes	Down
XP_011086610	CDS_37881_Unigene_58046	CDS_33554_Unigene_51096	alpha-glucan water chloroplastic-like	405.519	21819.1	53.8054	5.74968	6.45161e-06	Yes	0.00233195	Yes	Up
XP_011100244	CDS_12341_Unigene_22410	CDS_23429_Unigene_37079	probable transcription factor GLK1	7048.63	118.86	0.0168628	-5.89001	6.86808e-06	Yes	0.00242475	Yes	Down
XP_011082866	CDS_16275_Unigene_28043	CDS_21207_Unigene_34061	polyphenol oxidase chloroplastic-like	3430.09	36.8466	0.0107422	-6.54057	7.75632e-06	Yes	0.00263851	Yes	Down
XP_011098625	CDS_710_Unigene_1723	CDS_3845_Unigene_7730	zinc-finger homeodomain 9-like	7457.51	131.935	0.0176915	-5.8208	7.82115e-06	Yes	0.00263851	Yes	Down
XP_011076506	CDS_35390_Unigene_54758	CDS_249_Unigene_537	PREDICTED: uncharacterized protein LOC105160721	3158.34	32.0922	0.0101611	-6.6208	8.96502e-06	Yes	0.00295865	Yes	Down
XP_011069664	CDS_28405_Unigene_44802	CDS_23179_Unigene_36735	probable serine threonine- kinase At1g01540	83.2913	5096.72	61.1915	5.93526	9.44983e-06	Yes	0.0030523	Yes	Up
XP_011086107	CDS_16786_Unigene_28744	CDS_21420_Unigene_34353	stem-specific TSJT1-like	119.468	6496.89	54.3817	5.76505	1.0236e-05	Yes	0.00323736	Yes	Up
XP_011099680	CDS_18947_Unigene_31646	CDS_13389_Unigene_23033	lipase-like PAD4	77.402	4734.19	61.1637	5.9346	1.10298e-05	Yes	0.00341722	Yes	Up
XP_011086042	CDS_12455_Unigene_22589	CDS_1941_Unigene_4118	PREDICTED: LOW QUALITY PROTEIN: protein E6-like	6002.02	111.728	0.0186151	-5.74738	1.19226e-05	Yes	0.00361995	Yes	Down
XP_011096404	CDS_12856_Unigene_23108	CDS_12283_Unigene_21379	PREDICTED: uncharacterized protein LOC105175608	284.368	13507.2	47.4991	5.56983	1.30754e-05	Yes	0.00389212	Yes	Up
XP_011070424	CDS_1678_Unigene_3880	CDS_34186_Unigene_51981	PREDICTED: uncharacterized protein LOC105156082	1.68265	947.314	562.989	9.13696	1.41868e-05	Yes	0.00414173	Yes	Up
XP_011080134	CDS_35416_Unigene_54794	CDS_1156_Unigene_2519	receptor-like serine threonine- kinase ALE2 isoform X1	2804.98	29.715	0.0105937	-6.56066	1.58401e-05	Yes	0.00431736	Yes	Down
XP_011101424	CDS_13004_Unigene_23318	CDS_564_Unigene_1247	PREDICTED: uncharacterized protein LOC105179485	3348.48	43.9782	0.0131338	-6.25057	1.58258e-05	Yes	0.00431736	Yes	Down
XP_006474808	CDS_17533_Unigene_29751	CDS_14936_Unigene_25225	fructose-bisphosphate cytoplasmic isozyme 1	324.752	14680.4	45.205	5.49841	1.54415e-05	Yes	0.00431736	Yes	Up
XP_011096446	CDS_25865_Unigene_41172	CDS_17882_Unigene_29403	auxin response factor 3	39.5423	3164.05	80.0169	6.32223	1.5926e-05	Yes	0.00431736	Yes	Up
XP_011100772	CDS_26217_Unigene_41678	CDS_545_Unigene_1187	ubiquitin-conjugating enzyme E2 32-like	5164.06	98.6538	0.0191039	-5.70999	1.64217e-05	Yes	0.00437364	Yes	Down
XP_012843261	CDS_16750_Unigene_28697	CDS_10464_Unigene_18638	STAY-GREEN chloroplastic	2842	32.0922	0.0112921	-6.46854	1.81613e-05	Yes	0.00475355	Yes	Down
XP_011081127	CDS_12986_Unigene_23294	CDS_14919_Unigene_25206	primary amine oxidase-like	3340.91	46.3554	0.0138751	-6.17136	1.89193e-05	Yes	0.00486803	Yes	Down
XP_011091911	CDS_36103_Unigene_55624	CDS_6295_Unigene_12122	K(+) efflux antiporter chloroplastic	5359.25	110.54	0.020626	-5.59939	2.03545e-05	Yes	0.00511267	Yes	Down
XP_011094656	CDS_2048_Unigene_4655	CDS_16488_Unigene_27446	29 kDa ribonucleo chloroplastic	28648	742.875	0.0259311	-5.26917	2.05436e-05	Yes	0.00511267	Yes	Down
XP_011098287	CDS_11632_Unigene_21368	CDS_15106_Unigene_25495	MATE efflux family LAL5-like	97.5938	4749.64	48.6675	5.60489	2.45311e-05	Yes	0.00600656	Yes	Up
XP_011090133	CDS_38063_Unigene_58294	CDS_33494_Unigene_51019	CCR4-NOT transcription complex subunit 1 isoform X2	6443.72	152.141	0.0236107	-5.40441	2.62823e-05	Yes	0.00633319	Yes	Down
XP_011071161	CDS_13517_Unigene_24034	CDS_1762_Unigene_3835	PREDICTED: uncharacterized protein LOC105156657	11548	297.15	0.0257316	-5.28031	2.87156e-05	Yes	0.00660336	Yes	Down
XP_011093576	CDS_15685_Unigene_27131	CDS_356_Unigene_734	cfxQ homolog	3176.85	47.544	0.0149658	-6.06219	2.84069e-05	Yes	0.00660336	Yes	Down
XP_011098459	CDS_521_Unigene_1183	CDS_2429_Unigene_5123	probable monodehydroascorbate cytoplasmic isoform 2	5854.79	139.066	0.0237526	-5.39577	2.99736e-05	Yes	0.00660336	Yes	Down
XP_011099562	CDS_10800_Unigene_20183	CDS_9599_Unigene_17405	HEAT repeat-containing 5B isoform X1	2188.29	21.3948	0.00977695	-6.6764	3.00133e-05	Yes	0.00660336	Yes	Down
XP_011100312	CDS_38067_Unigene_58301	CDS_24695_Unigene_38803	probable histone-lysine N-methyltransferase ATXR3 isoform X1	2678.78	33.2808	0.0124239	-6.33074	2.93888e-05	Yes	0.00660336	Yes	Down
XP_011084110	CDS_21809_Unigene_35683	CDS_14834_Unigene_25066	probable galactinol--sucrose galactosyltransferase 6	1010.43	35165.9	34.8028	5.12113	2.8883e-05	Yes	0.00660336	Yes	Up
XP_011088827	CDS_37457_Unigene_57464	CDS_32278_Unigene_49337	AP-2 complex subunit alpha-1-like	3235.74	51.1098	0.0157954	-5.98435	3.15085e-05	Yes	0.00673741	Yes	Down
XP_011094459	CDS_33868_Unigene_52654	CDS_16703_Unigene_27772	ER membrane complex subunit 1	6501.77	161.65	0.0248624	-5.32989	3.15102e-05	Yes	0.00673741	Yes	Down
XP_011075333	CDS_10096_Unigene_19124	CDS_4753_Unigene_9228	ABC transporter A family member 1	2444.05	28.5264	0.0116718	-6.42083	3.34045e-05	Yes	0.00704326	Yes	Down
XP_011096254	CDS_38837_Unigene_59838	CDS_3613_Unigene_7301	4-hydroxy-tetrahydrodipicolinate reductase chloroplastic-like	3836.45	73.6932	0.0192087	-5.7021	3.42335e-05	Yes	0.00711916	Yes	Down
XP_011091483	CDS_13749_Unigene_24376	CDS_454_Unigene_988	sulfate transporter chloroplastic	2928.66	42.7896	0.0146107	-6.09684	3.4807e-05	Yes	0.00714062	Yes	Down
XP_012836951	CDS_34819_Unigene_53989	CDS_30567_Unigene_46990	probable quinone oxidoreductase	111.055	4704.48	42.3617	5.40469	4.07397e-05	Yes	0.00824626	Yes	Up
XP_011084213	CDS_38298_Unigene_58621	CDS_8223_Unigene_15278	UDP-glucuronate 4-epimerase 6	12438.2	356.58	0.0286682	-5.1244	4.30236e-05	Yes	0.00858697	Yes	Down
XP_011099030	CDS_10142_Unigene_19216	CDS_32038_Unigene_49002	receptor kinase FERONIA	23.5571	2120.46	90.0136	6.49207	4.35542e-05	Yes	0.00858697	Yes	Up
XP_011076719	CDS_12613_Unigene_22796	CDS_1095_Unigene_2362	60S acidic ribosomal P0	20180	613.317	0.0303923	-5.04015	4.54139e-05	Yes	0.00872695	Yes	Down
XP_011090732	CDS_19930_Unigene_33033	CDS_23367_Unigene_36999	photosystem I reaction center subunit chloroplastic-like	48268.6	1567.76	0.03248	-4.9443	4.5002e-05	Yes	0.00872695	Yes	Down
XP_011079428	CDS_33563_Unigene_52207	CDS_4031_Unigene_7998	CBL-interacting serine threonine- kinase 6-like	3042.24	52.2984	0.0171908	-5.86222	4.99167e-05	Yes	0.00938936	Yes	Down
XP_011086906	CDS_17780_Unigene_30108	CDS_16813_Unigene_27932	probable xyloglucan endotransglucosylase hydrolase 5	11202.3	333.997	0.0298151	-5.06781	5.02952e-05	Yes	0.00938936	Yes	Down
XP_011098005	CDS_36999_Unigene_56845	CDS_3941_Unigene_7884	kinesin-like calmodulin-binding homolog	1622.92	13.0746	0.00805623	-6.95568	5.07165e-05	Yes	0.00938936	Yes	Down
XP_011086491	CDS_5063_Unigene_10727	CDS_27423_Unigene_42576	UDP-glycosyltransferase 74B1	2633.35	39.2238	0.014895	-6.06903	5.20954e-05	Yes	0.00952844	Yes	Down
XP_011077159	CDS_18118_Unigene_30556	CDS_33688_Unigene_51258	aspartic ase 2 isoform X2	13.4612	1599.86	118.849	6.89299	5.31388e-05	Yes	0.00960357	Yes	Up
XP_011079922	CDS_12426_Unigene_22539	CDS_1521_Unigene_3463	BEACH domain-containing lvsA isoform X1	25.2398	2106.2	83.4476	6.3828	5.44177e-05	Yes	0.00971901	Yes	Up
XP_011089617	CDS_19372_Unigene_32274	CDS_27758_Unigene_43052	serine carboxypeptidase 1	17.6678	1773.39	100.374	6.64924	5.80432e-05	Yes	0.010246	Yes	Up
XP_012855123	CDS_14639_Unigene_25702	CDS_9788_Unigene_17675	MON2 homolog	1997.31	22.5834	0.0113069	-6.46665	5.87958e-05	Yes	0.0102595	Yes	Down
XP_011098467	CDS_37761_Unigene_57892	CDS_25981_Unigene_40605	serine threonine- kinase BLUS1	3292.95	65.373	0.0198524	-5.65454	6.041e-05	Yes	0.0104214	Yes	Down
XP_011083775	CDS_27565_Unigene_43609	CDS_141_Unigene_371	glucan endo-1,3-beta- acidic isoform PR-Q -like	4618.04	122.426	0.0265103	-5.2373	6.39159e-05	Yes	0.0109023	Yes	Down
XP_011094432	CDS_3959_Unigene_8619	CDS_5763_Unigene_11296	PREDICTED: uncharacterized protein LOC105174131	2200.07	29.715	0.0135064	-6.21021	6.89596e-05	Yes	0.0116319	Yes	Down
XP_012841109	CDS_34276_Unigene_53177	CDS_27536_Unigene_42736	probable cyclic nucleotide-gated ion channel 5	254.922	7880.42	30.9131	4.95015	7.29303e-05	Yes	0.0121665	Yes	Up
XP_011081872	CDS_21241_Unigene_34845	CDS_15999_Unigene_26807	psbP domain-containing chloroplastic	124.516	4539.26	36.4552	5.18805	7.38384e-05	Yes	0.0121841	Yes	Up
XP_012857616	CDS_28006_Unigene_44241	CDS_4391_Unigene_8577	CBS domain-containing CBSCBSPB3-like	4208.31	110.54	0.026267	-5.2506	7.58416e-05	Yes	0.0123801	Yes	Down
XP_012840450	CDS_39892_Unigene_62731	CDS_1010_Unigene_2230	F-box PP2-B10-like	15.1439	1565.39	103.368	6.69164	7.87017e-05	Yes	0.0127103	Yes	Up
XP_012827697	CDS_1272_Unigene_2766	CDS_13238_Unigene_22820	PREDICTED: uncharacterized protein LOC105948977	15616.7	538.436	0.0344782	-4.85817	8.18303e-05	Yes	0.0129403	Yes	Down
XP_011100960	CDS_852_Unigene_2073	CDS_261_Unigene_560	salicylate carboxymethyltransferase-like	583.88	16869.8	28.8926	4.85263	8.14868e-05	Yes	0.0129403	Yes	Up
XP_011098892	CDS_37441_Unigene_57434	CDS_16360_Unigene_27276	ribonucleoside-diphosphate reductase small chain-like	5037.86	150.952	0.0299635	-5.06065	8.42981e-05	Yes	0.0131931	Yes	Down
XP_011081722	CDS_38247_Unigene_58562	CDS_27440_Unigene_42598	zinc finger CCCH domain-containing 23	3468.79	80.8248	0.0233006	-5.42349	8.54918e-05	Yes	0.0132434	Yes	Down
XP_011094034	CDS_30749_Unigene_48071	CDS_30241_Unigene_46513	cycloartenol Synthase	2647.65	47.544	0.017957	-5.79931	8.73982e-05	Yes	0.0134019	Yes	Down
XP_012842222	CDS_34256_Unigene_53154	CDS_7477_Unigene_14099	mannosyl-oligosaccharide 1,2-alpha-mannosidase MNS3	2719.17	51.1098	0.0187961	-5.73342	9.20798e-05	Yes	0.0139786	Yes	Down
XP_011090656	CDS_36779_Unigene_56532	CDS_32076_Unigene_49058	argonaute 10	60.5755	2935.84	48.4658	5.5989	9.4046e-05	Yes	0.0141358	Yes	Up
XP_011095722	CDS_14212_Unigene_25054	CDS_9596_Unigene_17404	nuclear cap-binding subunit 1	4898.2	152.141	0.0310605	-5.00877	9.97985e-05	Yes	0.0148533	Yes	Down
XP_011080469	CDS_2117_Unigene_4770	CDS_13147_Unigene_22673	PREDICTED: uncharacterized protein At5g01610-like	2993.44	64.1844	0.0214417	-5.54344	0.000101954	Yes	0.0150269	Yes	Down
XP_011085122	CDS_16194_Unigene_27929	CDS_11450_Unigene_20105	eukaryotic translation initiation factor 3 subunit B-like	12085.6	438.593	0.0362904	-4.78427	0.000105178	Yes	0.015353	Yes	Down
XP_011071763	CDS_963_Unigene_2236	CDS_1181_Unigene_2585	lipase-like PAD4	12.6199	1353.82	107.276	6.74519	0.000107717	Yes	0.0155739	Yes	Up
XP_012843187	CDS_10844_Unigene_20240	CDS_7628_Unigene_14326	MAG2-interacting 2	1786.98	22.5834	0.0126378	-6.30611	0.000108871	Yes	0.0155922	Yes	Down
XP_011099715	CDS_16820_Unigene_28778	CDS_7100_Unigene_13452	probable methyltransferase PMT26	12485.3	462.365	0.0370328	-4.75505	0.000113061	Yes	0.016041	Yes	Down
XP_011093803	CDS_27958_Unigene_44181	CDS_5175_Unigene_9992	40S ribosomal S3-3-like	11686	436.216	0.037328	-4.7436	0.000117217	Yes	0.0164766	Yes	Down
XP_011071684	CDS_23490_Unigene_37937	CDS_33624_Unigene_51195	PHYTOCHROME KINASE SUBSTRATE 3-like	3.3653	697.708	207.324	7.69574	0.000121021	Yes	0.016702	Yes	Up
XP_012834310	CDS_34870_Unigene_54054	CDS_32844_Unigene_50111	PREDICTED: uncharacterized protein LOC105955154	0.841326	73.6932	87.5917	6.45272	0.000120873	Yes	0.016702	Yes	Up
XP_011096918	CDS_3048_Unigene_6833	CDS_1478_Unigene_3399	microsomal glutathione S-transferase 3	2014.98	30.9036	0.015337	-6.02684	0.000124849	Yes	0.0170751	Yes	Down
XP_011096692	CDS_26154_Unigene_41578	CDS_10913_Unigene_19278	probable LRR receptor-like serine threonine- kinase At4g20940	1887.94	27.3378	0.0144803	-6.10977	0.000130043	Yes	0.0176266	Yes	Down
XP_011076161	CDS_40011_Unigene_62945	CDS_6851_Unigene_13017	PREDICTED: uncharacterized protein LOC105160472	3136.46	77.259	0.0246325	-5.34329	0.000135455	Yes	0.0181977	Yes	Down
XP_012832270	CDS_11127_Unigene_20642	CDS_5368_Unigene_10389	non-specific lipid-transfer 1-like	7196.7	273.378	0.0379865	-4.71837	0.000138564	Yes	0.0184521	Yes	Down
XP_012828939	CDS_26212_Unigene_41672	CDS_18395_Unigene_30137	callose synthase 9	114.42	3849.87	33.6468	5.0724	0.000140242	Yes	0.0185131	Yes	Up
XP_011073737	CDS_13400_Unigene_23868	CDS_15891_Unigene_26665	probable polygalacturonase	62.2581	2765.87	44.4259	5.47333	0.000144738	Yes	0.018942	Yes	Up
XP_011097437	CDS_1221_Unigene_2694	CDS_1258_Unigene_2779	glucan endo-1,3-beta-glucosidase 2-like	2023.39	33.2808	0.016448	-5.92594	0.000147839	Yes	0.0191825	Yes	Down
XP_011081718	CDS_17330_Unigene_29480	CDS_16275_Unigene_27177	clathrin interactor EPSIN 1 isoform X1	129.564	4094.73	31.6038	4.98203	0.000149463	Yes	0.0192288	Yes	Up
XP_011096085	CDS_23472_Unigene_37910	CDS_16926_Unigene_28111	polyadenylate-binding RBP45 isoform X2	4405.18	146.198	0.0331877	-4.91321	0.000151446	Yes	0.0193202	Yes	Down
XP_011079781	CDS_9848_Unigene_18738	CDS_4531_Unigene_8792	sugar transporter ERD6-like 7	126.199	4000.83	31.7025	4.98653	0.000155859	Yes	0.0197174	Yes	Up
XP_011077604	CDS_11907_Unigene_21810	CDS_3285_Unigene_6581	fructose-1,6- chloroplastic	870.773	20701.8	23.7741	4.57132	0.000157181	Yes	0.0197204	Yes	Up
XP_011092883	CDS_24241_Unigene_38974	CDS_12890_Unigene_22301	translocase of chloroplast chloroplastic-like	126.199	3950.91	31.307	4.96841	0.000167212	Yes	0.0208069	Yes	Up
XP_011076899	CDS_20143_Unigene_33298	CDS_7361_Unigene_13916	40S ribosomal SA-like	6007.91	234.154	0.0389743	-4.68133	0.000174741	Yes	0.0213931	Yes	Down
XP_011073914	CDS_13460_Unigene_23943	CDS_836_Unigene_1923	chitinase 1	1185.43	26691.2	22.5161	4.49288	0.000174315	Yes	0.0213931	Yes	Up
XP_011069519	CDS_121_Unigene_290	CDS_4265_Unigene_8374	LRR receptor-like serine threonine- kinase ERECTA	515.733	12355.5	23.9572	4.58238	0.00017847	Yes	0.0216748	Yes	Up
XP_011087575	CDS_23265_Unigene_37603	CDS_6123_Unigene_11887	flap endonuclease 1	42.0663	2173.95	51.6791	5.69151	0.000180133	Yes	0.0217032	Yes	Up
XP_011083774	CDS_1365_Unigene_2962	CDS_7902_Unigene_14757	glucan endo-1,3-beta- acidic isoform PR-Q -like	3502.44	105.785	0.0302033	-5.04915	0.000189059	Yes	0.0217948	Yes	Down
XP_011070282	CDS_13163_Unigene_23534	CDS_2974_Unigene_6022	beta-amylase chloroplastic	349.15	8321.39	23.8332	4.5749	0.000187835	Yes	0.0217948	Yes	Up
XP_011078828	CDS_39459_Unigene_61657	CDS_35670_Unigene_55893	oligopeptide transporter 7-like isoform X1	403.837	9593.19	23.7551	4.57017	0.000184932	Yes	0.0217948	Yes	Up
XP_011096954	CDS_32442_Unigene_50551	CDS_26716_Unigene_41643	DNA mismatch repair MLH3 isoform X2	40.3837	2109.76	52.243	5.70717	0.000189508	Yes	0.0217948	Yes	Up
XP_011100076	CDS_26810_Unigene_42496	CDS_539_Unigene_1177	S-adenosylmethionine carrier chloroplastic mitochondrial	92.5459	3256.76	35.1908	5.13713	0.000186816	Yes	0.0217948	Yes	Up
XP_012836991	CDS_7116_Unigene_14182	CDS_12368_Unigene_21498	PREDICTED: uncharacterized protein LOC105957599	16.8265	1383.53	82.2232	6.36147	0.000185823	Yes	0.0217948	Yes	Up
XP_011095264	CDS_37374_Unigene_57334	CDS_5486_Unigene_10657	cyclic nucleotide-gated ion channel 4	2116.78	40.4124	0.0190915	-5.71093	0.000192894	Yes	0.0220175	Yes	Down
XP_011095583	CDS_326_Unigene_698	CDS_78_Unigene_159	PREDICTED: uncharacterized protein LOC105174992	1548.04	21.3948	0.0138206	-6.17704	0.000200489	Yes	0.0227137	Yes	Down
XP_011085468	CDS_38009_Unigene_58227	CDS_33574_Unigene_51121	histone acetyltransferase HAC1-like isoform X2	3765.78	123.614	0.0328257	-4.92903	0.00020606	Yes	0.0231719	Yes	Down
XP_011087302	CDS_12447_Unigene_22577	CDS_11444_Unigene_20098	activating signal cointegrator 1 complex subunit 3	2605.59	62.9958	0.0241772	-5.37021	0.000213961	Yes	0.0237726	Yes	Down
XP_011099924	CDS_18326_Unigene_30839	CDS_21829_Unigene_34892	uncharacterized oxidoreductase At4g09670-like	106.848	3438.62	32.1822	5.00819	0.000214535	Yes	0.0237726	Yes	Up
XP_011097100	CDS_5270_Unigene_11103	CDS_10751_Unigene_19033	PREDICTED: uncharacterized protein LOC105176095 isoform X2	1134.11	11.886	0.0104805	-6.57615	0.000228378	Yes	0.0251233	Yes	Down
XP_012853739	CDS_14956_Unigene_26100	CDS_7666_Unigene_14382	probable receptor kinase At5g24010	1531.21	22.5834	0.0147487	-6.08327	0.000239805	Yes	0.0261905	Yes	Down
XP_011095609	CDS_34523_Unigene_53545	CDS_28204_Unigene_43690	enhancer of mRNA-decapping 4-like	167.424	4384.74	26.1895	4.71092	0.000244586	Yes	0.0265219	Yes	Up
XP_012841353	CDS_6330_Unigene_12818	CDS_12346_Unigene_21459	vacuolar amino acid transporter 1	18.5092	1363.32	73.6567	6.20274	0.000247368	Yes	0.0266332	Yes	Up
XP_011071457	CDS_28442_Unigene_44856	CDS_32070_Unigene_49050	PREDICTED: cullin-1-like	9765.27	446.914	0.0457656	-4.44959	0.000250305	Yes	0.0267597	Yes	Down
XP_011074900	CDS_14584_Unigene_25619	CDS_3084_Unigene_6202	water chloroplastic	869.931	18387.6	21.1369	4.40169	0.000256263	Yes	0.0272051	Yes	Up
XP_011084336	CDS_35459_Unigene_54852	CDS_30384_Unigene_46748	cell division control 48 homolog C-like	2029.28	41.601	0.0205004	-5.60821	0.000260057	Yes	0.0272873	Yes	Down
XP_011094236	CDS_24835_Unigene_39789	CDS_1721_Unigene_3769	BEL1-like homeodomain 1	3038.87	90.3336	0.029726	-5.07213	0.000260632	Yes	0.0272873	Yes	Down
XP_011091914	CDS_2672_Unigene_6178	CDS_36030_Unigene_56548	vinorine synthase-like	14.3025	1162.45	81.2758	6.34475	0.000279345	Yes	0.0288486	Yes	Up
XP_012831701	CDS_19313_Unigene_32196	CDS_4170_Unigene_8210	monoacylglycerol lipase ABHD6	104.324	3241.31	31.0695	4.95743	0.00027806	Yes	0.0288486	Yes	Up
XP_011082310	CDS_16090_Unigene_27742	CDS_15795_Unigene_26519	transcription factor HBP-1a-like isoform X2	69.8301	2604.22	37.2937	5.22086	0.000282698	Yes	0.0289976	Yes	Up
XP_011092319	CDS_31493_Unigene_49130	CDS_26047_Unigene_40706	PREDICTED: uncharacterized protein At5g49945-like	241.461	5511.54	22.8258	4.5126	0.000288359	Yes	0.0293798	Yes	Up
XP_011092530	CDS_1507_Unigene_3270	CDS_10317_Unigene_18434	methylthioribose kinase	2555.11	67.7502	0.0265156	-5.23702	0.000292491	Yes	0.0296021	Yes	Down
XP_011082828	CDS_19736_Unigene_32770	CDS_11834_Unigene_20710	leucine-rich repeat receptor-like serine threonine- kinase At1g17230	205.284	4836.41	23.5597	4.55825	0.000299993	Yes	0.0301602	Yes	Up
XP_011083296	CDS_976_Unigene_2259	CDS_18446_Unigene_30204	regulator of nonsense transcripts UPF2 isoform X2	3193.67	104.597	0.0327512	-4.93231	0.000307524	Yes	0.0307139	Yes	Down
XP_011075966	CDS_13269_Unigene_23696	CDS_167_Unigene_405	myosin heavy striated muscle	2280.84	55.8642	0.0244929	-5.35149	0.000310416	Yes	0.0308002	Yes	Down
XP_011079210	CDS_19065_Unigene_31837	CDS_18625_Unigene_30467	PREDICTED: uncharacterized protein LOC105162786	10572.9	514.664	0.0486774	-4.3606	0.000314709	Yes	0.0310234	Yes	Down
XP_009626262	CDS_7833_Unigene_15513	CDS_4571_Unigene_8883	glyoxylate hydroxypyruvate reductase HPR3-like	18.5092	1287.25	69.5468	6.11991	0.000319972	Yes	0.0313387	Yes	Up
XP_011098140	CDS_36809_Unigene_56574	CDS_33144_Unigene_50498	PREDICTED: uncharacterized protein LOC105176896	96.7525	2991.71	30.9212	4.95053	0.00034518	Yes	0.0335909	Yes	Up
XP_011100399	CDS_28560_Unigene_45015	CDS_6724_Unigene_12776	choline-phosphate cytidylyltransferase 2-like isoform X1	4338.72	186.61	0.0430104	-4.53917	0.000372541	Yes	0.0359962	Yes	Down
XP_012830922	CDS_38006_Unigene_58223	CDS_7707_Unigene_14456	histone acetyltransferase HAC1-like isoform X1	1531.21	27.3378	0.0178537	-5.80763	0.000374639	Yes	0.0359962	Yes	Down
XP_011099610	CDS_36218_Unigene_55763	CDS_28376_Unigene_43926	vam6 Vps39	2241.29	58.2414	0.0259856	-5.26614	0.000380417	Yes	0.0363215	Yes	Down
XP_011075548	CDS_27788_Unigene_43947	CDS_25079_Unigene_39350	probable S-acyltransferase 22 isoform X1	3470.47	133.123	0.0383588	-4.7043	0.000409324	Yes	0.038596	Yes	Down
XP_012829622	CDS_33484_Unigene_52108	CDS_16786_Unigene_27898	alcohol dehydrogenase-like 7	182.568	4202.89	23.021	4.52488	0.000406881	Yes	0.038596	Yes	Up
XP_011081719	CDS_17424_Unigene_29627	CDS_16471_Unigene_27423	clathrin interactor EPSIN 1 isoform X2	1652.36	33.2808	0.0201413	-5.6337	0.00041651	Yes	0.0390311	Yes	Down
XP_011076664	CDS_13550_Unigene_24091	CDS_865_Unigene_2004	probable inactive receptor kinase At3g56050	2676.26	84.3906	0.031533	-4.98699	0.000427323	Yes	0.0397987	Yes	Down
XP_011096147	CDS_3089_Unigene_6937	CDS_5353_Unigene_10359	PREDICTED: uncharacterized protein LOC105175410	1475.69	27.3378	0.0185255	-5.75435	0.000444827	Yes	0.0411763	Yes	Down
XP_011091671	CDS_11317_Unigene_20952	CDS_2574_Unigene_5371	PREDICTED: uncharacterized protein LOC105172030	1783.61	40.4124	0.0226576	-5.46386	0.000463225	Yes	0.0426195	Yes	Down
XP_011078358	CDS_27107_Unigene_42916	CDS_18399_Unigene_30140	fe-S cluster assembly factor chloroplastic	298.671	5814.63	19.4684	4.28306	0.000480623	Yes	0.0436906	Yes	Up
XP_011089278	CDS_15331_Unigene_26616	CDS_9734_Unigene_17593	cinnamoyl- reductase 1-like	46.2729	1889.87	40.8419	5.35198	0.000477795	Yes	0.0436906	Yes	Up
XP_011094568	CDS_39313_Unigene_61024	CDS_35968_Unigene_56355	UDP-glycosyltransferase 73D1	2.52398	200.873	79.586	6.31444	0.00052391	Yes	0.047202	Yes	Up
XP_011096252	CDS_10756_Unigene_20108	CDS_2877_Unigene_5880	NRT1 PTR FAMILY -like	150.597	3556.29	23.6146	4.5616	0.000525468	Yes	0.047202	Yes	Up
XP_011074490	CDS_36371_Unigene_55971	CDS_33089_Unigene_50418	PREDICTED: uncharacterized protein LOC105159208 isoform X1	1592.63	34.4694	0.0216431	-5.52995	0.000539532	Yes	0.0476784	Yes	Down
XP_011083308	CDS_32987_Unigene_51342	CDS_18763_Unigene_30663	probable galacturonosyltransferase 15	1000.34	14.2632	0.0142584	-6.13204	0.000540118	Yes	0.0476784	Yes	Down
XP_011094389	CDS_11495_Unigene_21194	CDS_3604_Unigene_7274	PREDICTED: uncharacterized protein LOC105174097	5275.96	273.378	0.0518158	-4.27046	0.000540194	Yes	0.0476784	Yes	Down
XP_011079236	CDS_2674_Unigene_6185	CDS_15275_Unigene_25751	histone-lysine N- H3 lysine-9 specific SUVH1-like	27.7638	1408.49	50.7313	5.6648	0.000545218	Yes	0.0478436	Yes	Up
XP_012832933	CDS_14662_Unigene_25739	CDS_23069_Unigene_36590	F-box LRR-repeat MAX2 homolog A	27.7638	1406.11	50.6456	5.66237	0.000549317	Yes	0.0479263	Yes	Up
XP_011090440	CDS_978_Unigene_2262	CDS_2726_Unigene_5616	PREDICTED: uncharacterized protein LOC105171114	13.4612	936.617	69.5789	6.12058	0.000567267	Yes	0.0492096	Yes	Up
XP_011100028	CDS_16662_Unigene_28564	CDS_14455_Unigene_24504	PREDICTED: putative uncharacterized protein At4g01020, chloroplastic	20.1918	1173.15	58.1001	5.86047	0.00057183	Yes	0.0493236	Yes	Up
XP_011076095	CDS_12670_Unigene_22889	CDS_2129_Unigene_4567	probable fructose-bisphosphate aldolase chloroplastic	6747.44	376.786	0.0558414	-4.16252	0.000579767	Yes	0.0497257	Yes	Down
XP_011086099	CDS_1431_Unigene_3142	CDS_8685_Unigene_16046	lactosylceramide 4-alpha-galactosyltransferase-like	2536.6	85.5792	0.0337378	-4.88949	0.000587045	Yes	0.050067	Yes	Down
XP_012853943	CDS_3242_Unigene_7208	CDS_623_Unigene_1396	probable disease resistance At4g27220	1553.09	34.4694	0.0221941	-5.49368	0.000606047	Yes	0.0513989	No	Down
XP_011090202	CDS_11478_Unigene_21169	CDS_6976_Unigene_13234	la-related 1A-like	1825.68	47.544	0.0260418	-5.26303	0.000621503	Yes	0.0524169	No	Down
XP_011091175	CDS_12287_Unigene_22324	CDS_26523_Unigene_41391	ethylene receptor 2-like	100.959	2727.84	27.0192	4.75591	0.000640359	Yes	0.0537088	No	Up
XP_011079071	CDS_33614_Unigene_52294	CDS_19684_Unigene_31932	CDPK-related kinase 1-like	4591.12	240.097	0.052296	-4.25715	0.000654814	Yes	0.0540257	No	Down
XP_011085909	CDS_5995_Unigene_12283	CDS_13212_Unigene_22787	cysteine-rich receptor kinase 2	2896.69	112.917	0.0389814	-4.68107	0.000654602	Yes	0.0540257	No	Down
XP_011090906	CDS_5714_Unigene_11824	CDS_5180_Unigene_10003	PREDICTED: uncharacterized protein LOC105171472 isoform X1	44.5903	1736.54	38.9445	5.28335	0.000654676	Yes	0.0540257	No	Up
XP_011081728	CDS_27185_Unigene_43053	CDS_3503_Unigene_7033	PREDICTED: uncharacterized protein LOC105164707	1601.04	38.0352	0.0237565	-5.39553	0.000666552	Yes	0.0546969	No	Down
XP_008222425	CDS_13147_Unigene_23515	CDS_16061_Unigene_26886	PREDICTED: calreticulin-3	3972.74	194.93	0.049067	-4.3491	0.000673168	Yes	0.0549428	No	Down
XP_011073534	CDS_25256_Unigene_40366	CDS_25748_Unigene_40291	E3 ubiquitin- ligase XBAT34 isoform X2	15.1439	950.88	62.7897	5.97246	0.000684858	Yes	0.055598	No	Up
XP_011085363	CDS_5431_Unigene_11363	CDS_15524_Unigene_26125	PREDICTED: formimidoyltransferase-cyclodeaminase	123.675	2986.95	24.1516	4.59405	0.000723735	Yes	0.0584416	No	Up
XP_011080509	CDS_12132_Unigene_22127	CDS_5032_Unigene_9754	PREDICTED: uncharacterized protein LOC105163756	533.401	5.943	0.0111417	-6.48789	0.000745734	Yes	0.0597424	No	Down
XP_012845118	CDS_32756_Unigene_51037	CDS_3430_Unigene_6865	ubiquitin carboxyl-terminal hydrolase 17-like	1685.18	43.9782	0.0260971	-5.25997	0.000747714	Yes	0.0597424	No	Down
XP_011075906	CDS_4248_Unigene_9256	CDS_4115_Unigene_8137	growth-regulating factor 2-like	2773.85	110.54	0.0398506	-4.64925	0.000769946	Yes	0.0602502	No	Down
XP_011101045	CDS_40391_Unigene_63956	CDS_9590_Unigene_17392	E3 ubiquitin- ligase UBR7	2912.67	120.049	0.041216	-4.60065	0.000760844	Yes	0.0602502	No	Down
XP_012854573	CDS_1249_Unigene_2740	CDS_4236_Unigene_8318	aldehyde dehydrogenase family 2 member C4	5900.22	348.26	0.0590249	-4.08253	0.000769903	Yes	0.0602502	No	Down
XP_011088022	CDS_21024_Unigene_34516	CDS_250_Unigene_539	PREDICTED: uncharacterized protein LOC105169335	686.522	11092	16.1568	4.01407	0.000762745	Yes	0.0602502	No	Up
XP_011076575	CDS_12690_Unigene_22918	CDS_10414_Unigene_18572	E3 ubiquitin- ligase SHPRH isoform X4	1126.54	21.3948	0.0189917	-5.71849	0.000799819	Yes	0.0619551	No	Down
XP_011096686	CDS_848_Unigene_2069	CDS_4404_Unigene_8601	receptor kinase HAIKU2	180.885	3663.26	20.2519	4.33998	0.000800964	Yes	0.0619551	No	Up
XP_012837197	CDS_3510_Unigene_7685	CDS_13812_Unigene_23605	trafficking particle complex subunit 2	21.8745	1124.42	51.4031	5.68378	0.000803976	Yes	0.0619551	No	Up
XP_011089407	CDS_7369_Unigene_14679	CDS_5362_Unigene_10378	3-ketoacyl- synthase 12	2370.86	85.5792	0.0360963	-4.792	0.000820314	Yes	0.0628949	No	Down
XP_011083026	CDS_30519_Unigene_47719	CDS_29215_Unigene_45117	PREDICTED: alpha-mannosidase-like	6544.68	402.935	0.0615669	-4.0217	0.00083301	Yes	0.0633072	No	Down
XP_012836360	CDS_9636_Unigene_18417	CDS_2127_Unigene_4559	NEDD8 ultimate buster 1	2035.17	65.373	0.0321217	-4.96031	0.000834032	Yes	0.0633072	No	Down
XP_012836843	CDS_16972_Unigene_29002	CDS_14945_Unigene_25242	serine carboxypeptidase-like 18	4403.5	247.229	0.0561437	-4.15473	0.000879645	Yes	0.0664373	No	Down
XP_012857607	CDS_28007_Unigene_44242	CDS_4393_Unigene_8578	CBS domain-containing CBSCBSPB3-like	1130.74	22.5834	0.0199722	-5.64586	0.000885071	Yes	0.0665162	No	Down
XP_011070903	CDS_38924_Unigene_60033	CDS_5725_Unigene_11196	cytosolic sulfotransferase 12-like	11.7786	753.572	63.9783	5.99951	0.000901696	Yes	0.0671012	No	Up
XP_011080275	CDS_2393_Unigene_5482	CDS_18532_Unigene_30339	ADP,ATP carrier mitochondrial-like	2013.29	29105.2	14.4565	3.85365	0.000898243	Yes	0.0671012	No	Up
XP_011084896	CDS_17890_Unigene_30244	CDS_1126_Unigene_2422	anaphase-promoting complex subunit 1	1150.93	23.772	0.0206545	-5.5974	0.000923829	Yes	0.0680808	No	Down
XP_011077901	CDS_13730_Unigene_24334	CDS_34932_Unigene_53930	sodium transporter HKT1-like	22.7158	1108.96	48.819	5.60937	0.000920101	Yes	0.0680808	No	Up
XP_011082534	CDS_14108_Unigene_24911	CDS_1751_Unigene_3816	piezo-type mechanosensitive ion channel homolog isoform X2	19.3505	998.424	51.5968	5.68921	0.000960176	Yes	0.0704175	No	Up
XP_011101406	CDS_29467_Unigene_46220	CDS_23868_Unigene_37692	probable LRR receptor-like serine threonine- kinase At2g24230	15.1439	856.98	56.5893	5.82246	0.000982644	Yes	0.0717188	No	Up
XP_011098627	CDS_6365_Unigene_12884	CDS_9218_Unigene_16836	structural maintenance of chromosomes 4	2269.9	85.5792	0.0377018	-4.72922	0.00101109	Yes	0.0734423	No	Down
XP_011079338	CDS_29367_Unigene_46104	CDS_28701_Unigene_44393	ECERIFERUM 3-like	109.372	2603.03	23.7997	4.57287	0.00101925	Yes	0.0736818	No	Up
XP_011072648	CDS_11592_Unigene_21315	CDS_1080_Unigene_2329	PREDICTED: midasin	2563.52	106.974	0.0417293	-4.58279	0.00104094	Yes	0.0748933	No	Down
XP_011093896	CDS_34989_Unigene_54170	CDS_6719_Unigene_12767	1-phosphatidylinositol-3-phosphate 5-kinase FAB1A isoform X1	1195.52	27.3378	0.0228668	-5.4506	0.00108185	Yes	0.0773288	No	Down
XP_011096296	CDS_40205_Unigene_63683	CDS_8521_Unigene_15773	PREDICTED: allantoinase	933.872	17.829	0.0190915	-5.71093	0.00108498	Yes	0.0773288	No	Down
XP_011090165	CDS_17148_Unigene_29250	CDS_13074_Unigene_22561	serine--glyoxylate aminotransferase	10101	694.142	0.0687204	-3.86312	0.00110025	Yes	0.0780512	No	Down
XP_012836416	CDS_32287_Unigene_50349	CDS_25158_Unigene_39460	probable ADP-ribosylation factor GTPase-activating AGD11	47.1143	1583.21	33.6037	5.07055	0.00114386	Yes	0.0807672	No	Up
XP_011097517	CDS_8351_Unigene_16370	CDS_4380_Unigene_8553	PREDICTED: uncharacterized protein LOC105176419	290.258	4652.18	16.0278	4.0025	0.00116078	Yes	0.0815822	No	Up
XP_011099949	CDS_10978_Unigene_20441	CDS_12413_Unigene_21581	DELLA GAI	4726.57	300.716	0.0636224	-3.97432	0.00121372	Yes	0.0849098	No	Down
XP_011079924	CDS_18776_Unigene_31425	CDS_32368_Unigene_49464	transport Sec24-like At3g07100	1551.41	46.3554	0.0298796	-5.06469	0.00123093	Yes	0.085163	No	Down
XP_012835781	CDS_37722_Unigene_57842	CDS_15449_Unigene_26007	receptor 12	3944.14	232.966	0.0590663	-4.08152	0.00123324	Yes	0.085163	No	Down
XP_011092747	CDS_6419_Unigene_12957	CDS_4252_Unigene_8347	ferric reduction oxidase 2-like isoform X1	74.878	2012.3	26.8744	4.74816	0.00123417	Yes	0.085163	No	Up
XP_011086713	CDS_4602_Unigene_9858	CDS_12501_Unigene_21712	myosin-14 isoform X2	1705.37	55.8642	0.0327578	-4.93202	0.00127208	Yes	0.0873824	No	Down
XP_011084902	CDS_3550_Unigene_7754	CDS_773_Unigene_1769	zinc finger CCCH domain-containing 29	5316.34	356.58	0.0670724	-3.89814	0.00129643	Yes	0.0886535	No	Down
XP_011072934	CDS_40268_Unigene_63761	CDS_34047_Unigene_51757	ASPARTIC PROTEASE IN GUARD CELL 1-like	4556.62	292.396	0.0641694	-3.96197	0.00130359	Yes	0.0887433	No	Down
XP_011077158	CDS_35843_Unigene_55313	CDS_13874_Unigene_23682	aspartic ase 2 isoform X1	1706.21	57.0528	0.0334383	-4.90235	0.00133648	Yes	0.0897745	No	Down
XP_011083655	CDS_10726_Unigene_20054	CDS_3515_Unigene_7058	inositol-pentakisphosphate 2-kinase-like isoform X2	1842.5	65.373	0.0354805	-4.81683	0.00132618	Yes	0.0897745	No	Down
XP_011069526	CDS_2779_Unigene_6361	CDS_2180_Unigene_4662	chlorophyllide a chloroplastic-like	197.712	3498.05	17.6927	4.14508	0.00133156	Yes	0.0897745	No	Up
XP_011100631	CDS_31729_Unigene_49462	CDS_873_Unigene_2037	nuclear pore complex NUP133	1683.49	55.8642	0.0331835	-4.91339	0.00134729	Yes	0.0901023	No	Down
XP_011080476	CDS_39851_Unigene_62680	CDS_5585_Unigene_10886	CSC1 At4g35870	10.9372	619.26	56.6194	5.82323	0.00136974	Yes	0.091202	No	Up
XP_011086294	CDS_25483_Unigene_40670	CDS_540_Unigene_1178	probable galacturonosyltransferase 4	2288.41	97.4652	0.0425908	-4.55331	0.00138147	Yes	0.0913951	No	Down
XP_011095057	CDS_32407_Unigene_50496	CDS_6138_Unigene_11909	importin subunit beta-1-like	2335.52	101.031	0.0432584	-4.53087	0.00138468	Yes	0.0913951	No	Down
XP_012078858	CDS_22011_Unigene_35987	CDS_24583_Unigene_38653	glutathione S-transferase zeta class-like	334.006	4965.97	14.8679	3.89413	0.00139301	Yes	0.091547	No	Up
XP_011091703	CDS_11827_Unigene_21699	CDS_33168_Unigene_50541	disease resistance RPP8-like	31.1291	1188.6	38.183	5.25486	0.00142057	Yes	0.0929554	No	Up
XP_011102248	CDS_22201_Unigene_36271	CDS_19771_Unigene_32057	PREDICTED: uncharacterized protein LOC105180271	16.8265	814.191	48.3873	5.59656	0.00143752	Yes	0.0936609	No	Up
XP_002276171	CDS_36975_Unigene_56814	CDS_31912_Unigene_48830	receptor 12	1.68265	21.3948	12.7149	3.66845	0.00145728	Yes	0.0942917	No	Up
XP_011091761	CDS_4696_Unigene_10048	CDS_2371_Unigene_5013	elicitor-responsive 3-like	26.0811	1061.42	40.6969	5.34685	0.00145962	Yes	0.0942917	No	Up
XP_011096201	CDS_4340_Unigene_9388	CDS_5611_Unigene_10949	external alternative NAD(P)H-ubiquinone oxidoreductase mitochondrial	1891.3	71.316	0.0377074	-4.72901	0.0014671	Yes	0.0943733	No	Down
XP_011100883	CDS_39414_Unigene_61608	CDS_14069_Unigene_23980	uncharacterized aarF domain-containing kinase chloroplastic	12497.9	935.428	0.0748468	-3.73992	0.00148175	Yes	0.0948426	No	Down
XP_012857264	CDS_32399_Unigene_50482	CDS_3231_Unigene_6470	TBCC domain-containing 1-like	4856.13	331.619	0.0682887	-3.87221	0.00149252	Yes	0.0948426	No	Down
XP_015162055	CDS_26573_Unigene_42182	CDS_6341_Unigene_12177	dentin sialophospho -like	477.032	6559.88	13.7515	3.78151	0.00149314	Yes	0.0948426	No	Up
XP_011100785	CDS_36637_Unigene_56383	CDS_27575_Unigene_42805	serine threonine- phosphatase 4 regulatory subunit 3-like	63.0995	1748.43	27.7091	4.79229	0.00151069	Yes	0.0955574	No	Up
XP_011083071	CDS_36587_Unigene_56302	CDS_1701_Unigene_3738	ABC transporter C family member 5-like	1321.72	38.0352	0.028777	-5.11894	0.00151964	Yes	0.0957247	No	Down
XP_011089491	CDS_39890_Unigene_62728	CDS_1826_Unigene_3936	zinc transporter 2	5166.58	362.523	0.0701669	-3.83307	0.00154562	Yes	0.0969586	No	Down
XP_011085314	CDS_25545_Unigene_40733	CDS_25594_Unigene_40068	probable LRR receptor-like serine threonine- kinase RFK1 isoform X2	70.6714	1849.46	26.1699	4.70983	0.00156291	Yes	0.0976402	No	Up
XP_011087931	CDS_1548_Unigene_3420	CDS_35679_Unigene_55904	PREDICTED: protein SRG1-like	4212.52	278.132	0.0660252	-3.92084	0.00158794	Yes	0.0983327	No	Down
XP_011088893	CDS_20985_Unigene_34463	CDS_2232_Unigene_4761	glucan endo-1,3-beta-glucosidase 14-like	957.429	22.5834	0.0235875	-5.40583	0.00161286	Yes	0.0983327	No	Down
XP_011095090	CDS_39530_Unigene_61758	CDS_758_Unigene_1743	PREDICTED: uncharacterized protein LOC105174627	1394.08	42.7896	0.0306938	-5.02591	0.00160249	Yes	0.0983327	No	Down
XP_011102133	CDS_12233_Unigene_22252	CDS_16537_Unigene_27511	PREDICTED: uncharacterized protein LOC105180166	3891.13	248.417	0.0638419	-3.96935	0.0016114	Yes	0.0983327	No	Down
XP_011085849	CDS_22062_Unigene_36063	CDS_9057_Unigene_16627	nudix hydrolase mitochondrial-like	42.0663	1371.64	32.6067	5.0271	0.00160534	Yes	0.0983327	No	Up
XP_012066591	CDS_12333_Unigene_22397	CDS_17307_Unigene_28639	PREDICTED: uncharacterized protein LOC105629587	37.8597	1290.82	34.0948	5.09148	0.00160624	Yes	0.0983327	No	Up
XP_011072689	CDS_13992_Unigene_24721	CDS_1997_Unigene_4288	alanine aminotransferase 2	2103.32	90.3336	0.0429482	-4.54126	0.00166401	Yes	0.0996638	No	Down
XP_011084359	CDS_27091_Unigene_42881	CDS_656_Unigene_1477	chorismate synthase chloroplastic	5923.78	438.593	0.0740395	-3.75556	0.00167538	Yes	0.0996638	No	Down
XP_011088367	CDS_38052_Unigene_58279	CDS_33775_Unigene_51376	phosphatidylinositol 4-kinase alpha 1-like	3762.41	237.72	0.0631829	-3.98432	0.00164947	Yes	0.0996638	No	Down
XP_011102180	CDS_17622_Unigene_29877	CDS_7125_Unigene_13502	PREDICTED: uncharacterized protein LOC105180214	1961.97	79.6362	0.0405899	-4.62274	0.00164599	Yes	0.0996638	No	Down
XP_011074963	CDS_7835_Unigene_15520	CDS_29312_Unigene_45224	PREDICTED: patellin-3-like	232.206	3696.55	15.9192	3.9927	0.00166924	Yes	0.0996638	No	Up
XP_012837056	CDS_34147_Unigene_53016	CDS_30823_Unigene_47364	PREDICTED: uncharacterized protein LOC105957655	339.054	4818.58	14.2118	3.82902	0.00166478	Yes	0.0996638	No	Up
XP_012856795	CDS_37569_Unigene_57642	CDS_32456_Unigene_49578	phospholipid-transporting ATPase 4	42.9076	1371.64	31.9674	4.99853	0.00168065	Yes	0.0996638	No	Up
XP_011088564	CDS_39135_Unigene_60713	CDS_7400_Unigene_13976	PREDICTED: uncharacterized protein LOC105169758	6474	492.08	0.0760086	-3.71769	0.00174244	Yes	0.102926	No	Down
XP_011079894	CDS_26797_Unigene_42479	CDS_7338_Unigene_13866	coiled-coil domain-containing 150	2780.58	148.575	0.053433	-4.22612	0.00177038	Yes	0.103411	No	Down
XP_012830214	CDS_36699_Unigene_56457	CDS_32411_Unigene_49515	cation-chloride cotransporter 1	41.225	1322.91	32.09	5.00405	0.00177108	Yes	0.103411	No	Up
XP_012842056	CDS_20166_Unigene_33321	CDS_32284_Unigene_49347	asparagine--tRNA chloroplastic mitochondrial	196.87	3295.99	16.7419	4.06539	0.00175945	Yes	0.103411	No	Up
XP_011101290	CDS_39043_Unigene_60596	CDS_4525_Unigene_8786	PREDICTED: uncharacterized protein LOC105179378	800.942	17.829	0.02226	-5.4894	0.00179602	Yes	0.104066	No	Down
XP_011099269	CDS_29342_Unigene_46072	CDS_30752_Unigene_47251	BEL1-like homeodomain 4	148.073	2765.87	18.6791	4.22335	0.00179077	Yes	0.104066	No	Up
XP_011099175	CDS_39667_Unigene_62026	CDS_9179_Unigene_16790	PREDICTED: uncharacterized protein LOC105177651	3.3653	61.8072	18.366	4.19897	0.00182843	Yes	0.105541	No	Up
XP_011070638	CDS_26083_Unigene_41486	CDS_3454_Unigene_6920	U-box domain-containing 11-like	2164.73	98.6538	0.0455732	-4.45567	0.0018402	Yes	0.105818	No	Down
XP_011100424	CDS_8122_Unigene_16005	CDS_7_Unigene_20	Fanconi anemia group J	854.787	20.2062	0.0236389	-5.4027	0.0018743	Yes	0.106715	No	Down
XP_011078587	CDS_11567_Unigene_21286	CDS_8299_Unigene_15406	adenylate kinase chloroplastic isoform X1	345.785	4756.78	13.7565	3.78204	0.00187688	Yes	0.106715	No	Up
XP_011089560	CDS_22319_Unigene_36404	CDS_24412_Unigene_38411	phospholipase SGR2-like isoform X1	17.6678	771.401	43.6613	5.44828	0.00187529	Yes	0.106715	No	Up
XP_011101187	CDS_4854_Unigene_10369	CDS_2438_Unigene_5142	PREDICTED: uncharacterized protein At3g06530	3794.38	251.983	0.0664096	-3.91247	0.00189825	Yes	0.106952	No	Down
XP_011075097	CDS_1622_Unigene_3685	CDS_9102_Unigene_16694	E3 ubiquitin- ligase SINAT2 isoform X2	10.9372	0	0	-Inf	0.00190218	Yes	0.106952	No	Up
XP_011079595	CDS_22436_Unigene_36554	CDS_28859_Unigene_44620	kynurenine--oxoglutarate transaminase 1-like	6.73061	338.751	50.3299	5.65334	0.00189176	Yes	0.106952	No	Up
XP_011085035	CDS_38706_Unigene_59656	CDS_34892_Unigene_53878	PREDICTED: protein ELC-like	53.8449	1510.71	28.0567	4.81027	0.00192621	Yes	0.107903	No	Up
XP_011081258	CDS_37235_Unigene_57181	CDS_5341_Unigene_10320	transport SEC16B homolog	2608.95	137.878	0.0528479	-4.24201	0.00194091	Yes	0.108327	No	Down
XP_011087158	CDS_36692_Unigene_56451	CDS_20116_Unigene_32484	nucleobase-ascorbate transporter 6	1039.88	28.5264	0.0274324	-5.18797	0.00197335	Yes	0.109734	No	Down
XP_011093441	CDS_9098_Unigene_17611	CDS_16556_Unigene_27528	SNF2 domain-containing CLASSY 1-like isoform X1	1590.11	59.43	0.0373748	-4.74179	0.00200194	Yes	0.110918	No	Down
XP_011085850	CDS_16958_Unigene_28985	CDS_18021_Unigene_29592	2-oxoglutarate mitochondrial-like	4082.11	286.453	0.0701726	-3.83295	0.00201624	Yes	0.111304	No	Down
XP_011070605	CDS_31764_Unigene_49520	CDS_25119_Unigene_39422	PREDICTED: uncharacterized protein LOC105156229	3404.01	217.514	0.0638994	-3.96805	0.0020326	Yes	0.1118	No	Down
XP_011082961	CDS_21219_Unigene_34820	CDS_23939_Unigene_37797	PREDICTED: uncharacterized protein LOC105165595	2487.8	28690.4	11.5324	3.52763	0.00205185	Yes	0.112452	No	Up
XP_011071316	CDS_3672_Unigene_7950	CDS_3000_Unigene_6065	CBL-interacting serine threonine- kinase 1-like	1384.82	47.544	0.0343322	-4.86429	0.00209571	Yes	0.113942	No	Down
XP_012853623	CDS_39052_Unigene_60607	CDS_6496_Unigene_12418	PREDICTED: uncharacterized protein At4g06744-like	18022	1524.97	0.0846171	-3.56291	0.00211656	Yes	0.113942	No	Down
XP_011087962	CDS_9513_Unigene_18259	CDS_14637_Unigene_24798	GATA transcription factor 24-like isoform X2	59.7342	1567.76	26.2457	4.71401	0.00211432	Yes	0.113942	No	Up
XP_011095828	CDS_287_Unigene_618	CDS_35010_Unigene_54047	organic cation carnitine transporter 3-like	84.9739	1920.78	22.6043	4.49853	0.00210977	Yes	0.113942	No	Up
XP_011098568	CDS_1327_Unigene_2861	CDS_6527_Unigene_12468	F-box At5g62060	72.354	1754.37	24.2471	4.59974	0.00209121	Yes	0.113942	No	Up
XP_011091213	CDS_39588_Unigene_61851	CDS_35451_Unigene_55123	RING-H2 finger ATL16	5.04796	141.443	28.0199	4.80838	0.00218114	Yes	0.116685	No	Up
XP_011098517	CDS_21609_Unigene_35440	CDS_3428_Unigene_6860	xyloglucan glycosyltransferase 4	185.092	3034.5	16.3945	4.03514	0.00218289	Yes	0.116685	No	Up
XP_011084872	CDS_3351_Unigene_7415	CDS_12291_Unigene_21387	probable apyrase 7	1222.45	39.2238	0.0320863	-4.9619	0.00219939	Yes	0.116745	No	Down
XP_011099024	CDS_16128_Unigene_27821	CDS_22654_Unigene_36024	LONGIFOLIA 2-like	94.2285	2021.81	21.4564	4.42334	0.00219431	Yes	0.116745	No	Up
XP_011081502	CDS_31772_Unigene_49526	CDS_20758_Unigene_33389	PREDICTED: uncharacterized protein LOC105164543 isoform X1	926.3	24.9606	0.0269466	-5.21376	0.00221352	Yes	0.116939	No	Down
XP_011085010	CDS_34089_Unigene_52944	CDS_10496_Unigene_18690	delta-1-pyrroline-5-carboxylate synthase	2262.33	114.106	0.0504373	-4.30937	0.00221847	Yes	0.116939	No	Down
XP_011073246	CDS_4482_Unigene_9643	CDS_2161_Unigene_4629	ARF guanine-nucleotide exchange factor GNL2	42.9076	2.3772	0.0554027	-4.1739	0.00224205	Yes	0.117126	No	Down
XP_011099063	CDS_14721_Unigene_25809	CDS_10519_Unigene_18718	alpha beta hydrolase domain-containing 17C	838.802	21.3948	0.0255064	-5.293	0.00223082	Yes	0.117126	No	Down
XP_011096196	CDS_26303_Unigene_41798	CDS_18555_Unigene_30359	TRANSPORT INHIBITOR RESPONSE 1-like	167.424	2838.38	16.9532	4.08349	0.00224515	Yes	0.117126	No	Up
XP_011085713	CDS_14008_Unigene_24746	CDS_2491_Unigene_5236	cyclic nucleotide-gated ion channel 2-like	25.2398	915.222	36.2611	5.18035	0.00226638	Yes	0.117829	No	Up
XP_011085020	CDS_14465_Unigene_25445	CDS_1287_Unigene_2855	scarecrow 14	1096.25	33.2808	0.0303588	-5.04174	0.00227736	Yes	0.117995	No	Down
XP_011085485	CDS_14556_Unigene_25585	CDS_28653_Unigene_44330	disulfide isomerase-like 2-3	100.118	2072.92	20.7048	4.37189	0.00229984	Yes	0.118133	No	Up
XP_011088614	CDS_2295_Unigene_5210	CDS_363_Unigene_754	probable BOI-related E3 ubiquitin- ligase 2	5.04796	128.369	25.4298	4.66845	0.00230337	Yes	0.118133	No	Up
XP_013673968	CDS_17277_Unigene_29415	CDS_34378_Unigene_52735	PREDICTED: uncharacterized protein LOC106378372	45.4316	1309.84	28.831	4.84955	0.00229879	Yes	0.118133	No	Up
XP_011078689	CDS_2442_Unigene_5664	CDS_6519_Unigene_12454	leucine-rich repeat receptor kinase TDR	45.4316	1306.27	28.7525	4.84561	0.00232303	Yes	0.118342	No	Up
XP_011086553	CDS_17022_Unigene_29077	CDS_9533_Unigene_17306	methyl- -binding domain-containing 9-like	27.7638	965.143	34.7627	5.11947	0.00232161	Yes	0.118342	No	Up
XP_011078452	CDS_13533_Unigene_24063	CDS_10277_Unigene_18372	kinesin-related 11 isoform X2	260.811	5.943	0.0227866	-5.45567	0.00236551	Yes	0.120103	No	Down
XP_011078272	CDS_18426_Unigene_30963	CDS_9925_Unigene_17874	sugar transport 14-like	263.335	3721.51	14.1322	3.82091	0.00238223	Yes	0.120335	No	Up
XP_011088613	CDS_6643_Unigene_13356	CDS_6313_Unigene_12143	F-box At3g54460 isoform X3	23.5571	861.735	36.5806	5.19301	0.00238593	Yes	0.120335	No	Up
XP_011069859	CDS_23459_Unigene_37892	CDS_3388_Unigene_6761	probable alpha,alpha-trehalose-phosphate synthase [UDP-forming] 11	956.588	27.3378	0.0285784	-5.12893	0.00239963	Yes	0.120625	No	Down
XP_011101493	CDS_51_Unigene_112	CDS_33973_Unigene_51667	UPF0481 At3g47200	38.701	1174.34	30.3438	4.92333	0.00241033	Yes	0.120763	No	Up
XP_011073330	CDS_10071_Unigene_19076	CDS_6198_Unigene_12004	PREDICTED: uncharacterized protein LOC105158314	1184.59	39.2238	0.0331118	-4.91651	0.00246846	Yes	0.121274	No	Down
XP_011087199	CDS_34629_Unigene_53702	CDS_8869_Unigene_16348	PREDICTED: uncharacterized protein LOC105168755 isoform X1	1548.04	61.8072	0.0399261	-4.64652	0.00245667	Yes	0.121274	No	Down
XP_011089078	CDS_34771_Unigene_53897	CDS_2017_Unigene_4345	cell division control 45 homolog	977.621	28.5264	0.0291794	-5.09891	0.00243749	Yes	0.121274	No	Down
XP_011100262	CDS_27595_Unigene_43651	CDS_27715_Unigene_42987	mannan endo-1,4-beta-mannosidase 2-like	2880.7	177.101	0.0614786	-4.02377	0.00246401	Yes	0.121274	No	Down
XP_011069575	CDS_13408_Unigene_23879	CDS_15643_Unigene_26312	polyadenylate-binding -interacting 7-like	704.19	8198.96	11.6431	3.5414	0.0024652	Yes	0.121274	No	Up
XP_011080988	CDS_18147_Unigene_30591	CDS_23329_Unigene_36938	PREDICTED: paramyosin-like	91.7045	1939.79	21.1527	4.40277	0.0024537	Yes	0.121274	No	Up
XP_011069700	CDS_22303_Unigene_36384	CDS_26831_Unigene_41751	probable inactive shikimate kinase like chloroplastic	323.911	4227.85	13.0525	3.70626	0.00254183	Yes	0.124476	No	Up
XP_011074632	CDS_37482_Unigene_57510	CDS_33436_Unigene_50920	coatomer subunit alpha-1-like	2888.27	180.667	0.062552	-3.9988	0.00257561	Yes	0.124657	No	Down
XP_011094392	CDS_13088_Unigene_23430	CDS_5783_Unigene_11364	serine threonine- kinase D6PKL1-like	909.474	26.1492	0.028752	-5.12019	0.00258502	Yes	0.124657	No	Down
XP_012840794	CDS_8134_Unigene_16024	CDS_25674_Unigene_40198	probable esterase KAI2	2171.46	112.917	0.0520004	-4.26533	0.0025866	Yes	0.124657	No	Down
XP_011072007	CDS_10439_Unigene_19668	CDS_19418_Unigene_31559	BTB POZ and TAZ domain-containing 1	1696.11	18947.5	11.1711	3.4817	0.00256348	Yes	0.124657	No	Up
XP_011085625	CDS_11657_Unigene_21402	CDS_29743_Unigene_45829	eukaryotic translation initiation factor 4G-like isoform X1	28.6051	953.257	33.3247	5.05852	0.00257698	Yes	0.124657	No	Up
XP_011073498	CDS_36728_Unigene_56482	CDS_29480_Unigene_45461	MATH domain-containing At5g43560-like isoform X1	87.4979	1862.54	21.2866	4.41188	0.00259699	Yes	0.124763	No	Up
XP_011086859	CDS_31147_Unigene_48627	CDS_12717_Unigene_22029	serine threonine- phosphatase PP2A-2 catalytic subunit	532.559	6236.58	11.7106	3.54974	0.00265014	Yes	0.126914	No	Up
XP_011075430	CDS_10286_Unigene_19425	CDS_10896_Unigene_19252	microtubule-associated 70-2-like	753.828	8561.48	11.3573	3.50555	0.00266844	Yes	0.127071	No	Up
XP_011077208	CDS_6781_Unigene_13621	CDS_2627_Unigene_5455	scarecrow 14	34.4944	1061.42	30.7708	4.94349	0.00267309	Yes	0.127071	No	Up
XP_011088029	CDS_25097_Unigene_40165	CDS_5801_Unigene_11407	PREDICTED: protein starmaker-like	148.915	2544.79	17.0889	4.09499	0.00267853	Yes	0.127071	No	Up
XP_011086130	CDS_39902_Unigene_62750	CDS_1106_Unigene_2379	vacuolar 8	1638.9	71.316	0.0435145	-4.52236	0.00272947	Yes	0.129071	No	Down
XP_011099231	CDS_10563_Unigene_19828	CDS_1439_Unigene_3334	probable leucine-rich repeat receptor kinase At5g63930	19.3505	721.48	37.2848	5.22052	0.00273769	Yes	0.129071	No	Up
XP_012840751	CDS_18626_Unigene_31229	CDS_16100_Unigene_26945	PREDICTED: uncharacterized protein LOC105961060	38.701	1130.36	29.2075	4.86827	0.00276023	Yes	0.129731	No	Up
XP_011074309	CDS_36467_Unigene_56129	CDS_21199_Unigene_34050	inositol-tetrakisphosphate 1-kinase 2 isoform X1	85.8153	1805.48	21.0392	4.39501	0.00282479	Yes	0.132355	No	Up
XP_011090892	CDS_23383_Unigene_37773	CDS_31268_Unigene_47988	probable prolyl 4-hydroxylase 4	1440.35	58.2414	0.0404356	-4.62823	0.002859	Yes	0.133136	No	Down
XP_011083559	CDS_31159_Unigene_48650	CDS_11393_Unigene_20011	tubulin beta chain-like	1879.52	20256.1	10.7773	3.42992	0.00285435	Yes	0.133136	No	Up
XP_011091239	CDS_8962_Unigene_17392	CDS_17754_Unigene_29241	pre-mRNA-processing factor 19-like	88.3392	1826.88	20.6803	4.37018	0.00288837	Yes	0.134093	No	Up
XP_011090175	CDS_12079_Unigene_22051	CDS_23059_Unigene_36571	F-box At2g32560-like	5333.17	457.611	0.0858047	-3.5428	0.00294423	Yes	0.135855	No	Down
XP_011074267	CDS_1099_Unigene_2480	CDS_11894_Unigene_20796	leucine-rich repeat-containing DDB_G0290503	53.8449	1359.76	25.2533	4.6584	0.00293546	Yes	0.135855	No	Up
XP_011081599	CDS_17875_Unigene_30229	CDS_21074_Unigene_33846	PREDICTED: uncharacterized protein LOC105164608	56.3688	1393.04	24.7129	4.62719	0.00297078	Yes	0.136665	No	Up
XP_012839614	CDS_13421_Unigene_23897	CDS_3508_Unigene_7042	E3 ubiquitin- ligase listerin	1335.18	52.2984	0.0391694	-4.67413	0.00300016	Yes	0.137118	No	Down
XP_011071203	CDS_22333_Unigene_36415	CDS_18594_Unigene_30416	ATP-dependent RNA helicase dhx8	18.5092	676.313	36.5394	5.19138	0.0030008	Yes	0.137118	No	Up
XP_011096255	CDS_12215_Unigene_22230	CDS_8121_Unigene_15130	bifunctional epoxide hydrolase 2-like	212.856	3089.17	14.513	3.85927	0.00300774	Yes	0.137118	No	Up
XP_011089451	CDS_15924_Unigene_27493	CDS_1224_Unigene_2708	PREDICTED: uncharacterized protein LOC105170398	1786.98	86.7678	0.0485556	-4.36422	0.00306367	Yes	0.13925	No	Down
XP_011100605	CDS_31737_Unigene_49473	CDS_7809_Unigene_14612	TBC1 domain family member 2B	694.935	19.0176	0.027366	-5.19147	0.00308424	Yes	0.139351	No	Down
XP_012847730	CDS_12881_Unigene_23143	CDS_35404_Unigene_55052	cell division topological specificity factor chloroplastic	221.269	3148.6	14.2298	3.83084	0.00308132	Yes	0.139351	No	Up
XP_011092054	CDS_11098_Unigene_20607	CDS_2458_Unigene_5174	PREDICTED: uncharacterized protein LOC105172362	1187.95	43.9782	0.0370202	-4.75555	0.00313927	Yes	0.141416	No	Down
XP_011070523	CDS_9833_Unigene_18709	CDS_21365_Unigene_34269	annexin D5	10516.6	974.652	0.0926777	-3.43163	0.00315135	Yes	0.14154	No	Down
XP_011089856	CDS_7735_Unigene_15341	CDS_7894_Unigene_14744	PREDICTED: uncharacterized protein LOC105170683	742.891	21.3948	0.0287994	-5.11782	0.0032128	Yes	0.142613	No	Down
XP_011070588	CDS_28478_Unigene_44904	CDS_25297_Unigene_39653	glucan endo-1,3-beta-glucosidase 3	10.0959	388.672	38.498	5.26671	0.00320518	Yes	0.142613	No	Up
XP_011078395	CDS_16667_Unigene_28569	CDS_16956_Unigene_28152	heat stress transcription factor C-1-like	227.999	3183.07	13.9609	3.80332	0.00319691	Yes	0.142613	No	Up
XP_011082558	CDS_22282_Unigene_36361	CDS_12208_Unigene_21239	mitochondrial ribosome-associated GTPase 1	164.059	2597.09	15.8303	3.98461	0.00318862	Yes	0.142613	No	Up
XP_011079752	CDS_11348_Unigene_20988	CDS_22349_Unigene_35599	PREDICTED: uncharacterized protein LOC105163194	650.345	17.829	0.0274147	-5.18891	0.00325775	Yes	0.143026	No	Down
XP_011083708	CDS_1351_Unigene_2928	CDS_4141_Unigene_8167	probable serine threonine kinase IRE4 isoform X1	795.053	23.772	0.0298999	-5.06372	0.00324169	Yes	0.143026	No	Down
XP_011089949	CDS_3146_Unigene_7052	CDS_8866_Unigene_16346	neurofilament medium polypeptide	3337.54	247.229	0.0740751	-3.75487	0.0032598	Yes	0.143026	No	Down
XP_011096241	CDS_19237_Unigene_32090	CDS_25206_Unigene_39528	peroxisome biogenesis factor 10-like	98.4352	1895.82	19.2595	4.2675	0.00323768	Yes	0.143026	No	Up
XP_012835259	CDS_37177_Unigene_57095	CDS_11397_Unigene_20014	chromatin modification-related EAF1 B-like isoform X2	892.647	28.5264	0.0319571	-4.96772	0.00327761	Yes	0.143393	No	Down
XP_011092966	CDS_35584_Unigene_55008	CDS_32709_Unigene_49930	aquaporin PIP2-7	23550.4	2310.64	0.0981146	-3.34939	0.00330912	Yes	0.144356	No	Down
XP_011081801	CDS_16884_Unigene_28891	CDS_10409_Unigene_18566	aquaporin TIP4-1	7903.42	740.498	0.0936933	-3.41591	0.00332786	Yes	0.144757	No	Down
XP_011101653	CDS_25181_Unigene_40282	CDS_19658_Unigene_31897	rab3 GTPase-activating catalytic subunit isoform X3	62.2581	1433.45	23.0243	4.52509	0.00334565	Yes	0.145115	No	Up
XP_011084684	CDS_38737_Unigene_59694	CDS_5640_Unigene_11012	INO80 complex subunit D-like	885.916	28.5264	0.0321999	-4.9568	0.00335671	Yes	0.14518	No	Down
XP_011087131	CDS_7936_Unigene_15723	CDS_8191_Unigene_15230	serine threonine phosphatase 2A 57 kDa regulatory subunit B iota isoform	1668.35	80.8248	0.0484459	-4.36748	0.00342585	Yes	0.146951	No	Down
XP_012854933	CDS_19559_Unigene_32533	CDS_24733_Unigene_38848	PREDICTED: protein disulfide-isomerase	5464.41	493.269	0.0902693	-3.46962	0.00342335	Yes	0.146951	No	Down
XP_011072950	CDS_2481_Unigene_5744	CDS_2535_Unigene_5308	PREDICTED: uncharacterized protein LOC105158039	13.4612	495.646	36.8203	5.20243	0.00342669	Yes	0.146951	No	Up
XP_011077889	CDS_13089_Unigene_23433	CDS_5784_Unigene_11364	serine threonine- kinase D6PKL1-like	35.3357	997.235	28.2217	4.81874	0.0034736	Yes	0.148543	No	Up
XP_011090789	CDS_20547_Unigene_33835	CDS_11140_Unigene_19636	flavanone 3-dioxygenase-like	2735.15	184.233	0.0673575	-3.89202	0.0034903	Yes	0.148838	No	Down
XP_011082125	CDS_9401_Unigene_18096	CDS_4323_Unigene_8471	TATA-binding -associated factor BTAF1	3242.47	242.474	0.0747807	-3.74119	0.00351475	Yes	0.14896	No	Down
XP_011090367	CDS_8672_Unigene_16921	CDS_8304_Unigene_15410	PREDICTED: uncharacterized protein LOC105171060	3313.14	250.795	0.0756969	-3.72362	0.00351532	Yes	0.14896	No	Down
XP_011094438	CDS_16152_Unigene_27852	CDS_10736_Unigene_19012	probable leucine-rich repeat receptor kinase At1g68400	630.995	17.829	0.0282554	-5.14533	0.0035226	Yes	0.14896	No	Down
XP_011100648	CDS_23315_Unigene_37664	CDS_4381_Unigene_8557	type I inositol 1,4,5-trisphosphate 5-phosphatase 1-like isoform X2	2166.41	127.18	0.0587054	-4.09036	0.00356144	Yes	0.149801	No	Down
XP_011070516	CDS_35147_Unigene_54397	CDS_22881_Unigene_36340	sodium hydrogen exchanger 7 isoform X2	135.454	2248.83	16.6022	4.05331	0.00356224	Yes	0.149801	No	Up
XP_011082476	CDS_37922_Unigene_58095	CDS_33641_Unigene_51215	PREDICTED: uncharacterized protein LOC105165229	111.055	1986.15	17.8844	4.16063	0.00360874	Yes	0.151338	No	Up
XP_011092645	CDS_18345_Unigene_30863	CDS_17863_Unigene_29378	probable carotenoid cleavage dioxygenase chloroplastic	891.806	9249.68	10.3719	3.3746	0.00362252	Yes	0.151497	No	Up
XP_011092960	CDS_2079_Unigene_4705	CDS_8604_Unigene_15936	zeaxanthin chloroplastic-like	21.8745	710.783	32.4937	5.02209	0.00364382	Yes	0.151969	No	Up
XP_011087654	CDS_27249_Unigene_43152	CDS_24990_Unigene_39220	ras-related RABD1-like	4715.63	420.764	0.0892275	-3.48637	0.0036693	Yes	0.152613	No	Down
XP_011086753	CDS_34112_Unigene_52987	CDS_27686_Unigene_42944	lipoxygenase chloroplastic	595.659	6307.9	10.5898	3.4046	0.00369239	Yes	0.153154	No	Up
XP_011088398	CDS_25560_Unigene_40757	CDS_2097_Unigene_4502	probable LRR receptor-like serine threonine- kinase At2g16250	1202.26	48.7326	0.0405343	-4.62471	0.00376776	Yes	0.155047	No	Down
XP_012854107	CDS_2800_Unigene_6390	CDS_2062_Unigene_4434	ruvB-like 2	2436.48	156.895	0.0643942	-3.95693	0.0037528	Yes	0.155047	No	Down
XP_011102056	CDS_36577_Unigene_56290	CDS_32859_Unigene_50132	PREDICTED: adenosylhomocysteinase	2566.89	25140.1	9.794	3.2919	0.00376869	Yes	0.155047	No	Up
XP_011074654	CDS_31048_Unigene_48513	CDS_17977_Unigene_29519	auxin response factor 5-like	1957.77	110.54	0.0564622	-4.14657	0.00381588	Yes	0.156565	No	Down
XP_012852995	CDS_28081_Unigene_44340	CDS_26092_Unigene_40771	NRT1 PTR FAMILY -like	30.2877	872.432	28.8048	4.84824	0.0038564	Yes	0.157801	No	Up
XP_011098621	CDS_17846_Unigene_30188	CDS_7114_Unigene_13477	PREDICTED: uncharacterized protein LOC105177245	1621.24	82.0134	0.050587	-4.30509	0.003982	Yes	0.161633	No	Down
XP_011072520	CDS_22910_Unigene_37160	CDS_8890_Unigene_16375	receptor-like serine threonine- kinase ALE2	21.8745	688.199	31.4613	4.97551	0.00398105	Yes	0.161633	No	Up
XP_011085926	CDS_38966_Unigene_60146	CDS_4038_Unigene_8008	REVEILLE 1	14.3025	488.514	34.1558	5.09406	0.00396606	Yes	0.161633	No	Up
XP_011090662	CDS_28608_Unigene_45046	CDS_18794_Unigene_30702	PREDICTED: uncharacterized protein LOC105171293	47.1143	1148.19	24.3703	4.60705	0.00402618	Yes	0.16299	No	Up
XP_011079618	CDS_26950_Unigene_42699	CDS_12897_Unigene_22312	probable ATP-dependent RNA helicase DHX37	2470.97	165.215	0.0668624	-3.90266	0.00405625	Yes	0.163399	No	Down
XP_011099130	CDS_17474_Unigene_29686	CDS_16154_Unigene_27028	phospholipase A1-IIbeta-like	420.663	11.886	0.0282554	-5.14533	0.00405779	Yes	0.163399	No	Down
XP_011080360	CDS_39472_Unigene_61675	CDS_34411_Unigene_52779	phospholipase A1- chloroplastic	10.0959	333.997	33.0823	5.04799	0.00409772	Yes	0.164136	No	Up
XP_011094867	CDS_17284_Unigene_29426	CDS_16212_Unigene_27101	ribonuclease chloroplastic mitochondrial	157.328	2389.09	15.1854	3.92461	0.00409637	Yes	0.164136	No	Up
XP_012829088	CDS_21032_Unigene_34529	CDS_11882_Unigene_20781	PREDICTED: LOW QUALITY PROTEIN: uncharacterized protein LOC105950280	1716.31	91.5222	0.0533251	-4.22904	0.00411853	Yes	0.164535	No	Down
XP_011071859	CDS_39095_Unigene_60658	CDS_6349_Unigene_12192	PREDICTED: uncharacterized protein LOC105157216	68.1474	1426.32	20.9299	4.38749	0.00420359	Yes	0.167054	No	Up
XP_011089755	CDS_4367_Unigene_9454	CDS_12846_Unigene_22236	E3 ubiquitin- ligase CIP8-like isoform X1	31.1291	864.112	27.759	4.79488	0.00420295	Yes	0.167054	No	Up
XP_007222560	CDS_26006_Unigene_41361	CDS_22565_Unigene_35890	hypothetical protein PRUPE_ppa008371mg	29845.2	3196.14	0.107091	-3.22309	0.00426137	Yes	0.168908	No	Down
XP_011077169	CDS_37423_Unigene_57408	CDS_12311_Unigene_21412	coatomer subunit beta-1	4082.96	364.9	0.0893716	-3.48404	0.00428394	Yes	0.16936	No	Down
XP_011089727	CDS_34925_Unigene_54086	CDS_32667_Unigene_49859	PREDICTED: importin-5-like	792.529	27.3378	0.0344944	-4.8575	0.00431972	Yes	0.170035	No	Down
XP_011099296	CDS_14671_Unigene_25747	CDS_3140_Unigene_6299	proline-rich receptor kinase PERK8	1323.41	60.6186	0.045805	-4.44835	0.0043234	Yes	0.170035	No	Down
XP_011098356	CDS_32206_Unigene_50205	CDS_1168_Unigene_2542	receptor kinase THESEUS 1	984.352	38.0352	0.0386398	-4.69377	0.00434262	Yes	0.170171	No	Down
XP_011099088	CDS_17901_Unigene_30261	CDS_20945_Unigene_33669	ATP-dependent zinc metalloprotease FTSH chloroplastic	352.516	3971.11	11.2651	3.49378	0.00434928	Yes	0.170171	No	Up
XP_011078387	CDS_28156_Unigene_44434	CDS_8267_Unigene_15351	pentatricopeptide repeat-containing mitochondrial	183.409	7.1316	0.0388836	-4.6847	0.00440978	Yes	0.17097	No	Down
XP_011096547	CDS_16177_Unigene_27899	CDS_1447_Unigene_3345	phospho-N-acetylmuramoyl-pentapeptide-transferase homolog	576.308	17.829	0.0309366	-5.01454	0.00440066	Yes	0.17097	No	Down
XP_011100314	CDS_26971_Unigene_42726	CDS_18505_Unigene_30298	BTB POZ domain-containing At3g22104-like	476.191	14.2632	0.0299527	-5.06117	0.00442601	Yes	0.17097	No	Down
XP_012830901	CDS_171_Unigene_412	CDS_14065_Unigene_23976	PAT1 homolog 1	185.933	2605.41	14.0126	3.80866	0.00442413	Yes	0.17097	No	Up
XP_012851984	CDS_38904_Unigene_59988	CDS_35313_Unigene_54919	probable carboxylesterase 120	174.155	2504.38	14.3802	3.84601	0.00439648	Yes	0.17097	No	Up
XP_011089374	CDS_35111_Unigene_54353	CDS_31933_Unigene_48852	PREDICTED: LOW QUALITY PROTEIN: uncharacterized protein LOC105170344	3672.39	317.356	0.0864168	-3.53254	0.00444534	Yes	0.171043	No	Down
XP_011096694	CDS_15913_Unigene_27479	CDS_12491_Unigene_21700	PREDICTED: uncharacterized protein LOC105175800	310.449	9.5088	0.0306291	-5.02895	0.00445467	Yes	0.171043	No	Down
XP_011096929	CDS_5526_Unigene_11527	CDS_7838_Unigene_14655	sucrose synthase 5-like	806.832	28.5264	0.0353561	-4.8219	0.00446171	Yes	0.171043	No	Down
XP_011076460	CDS_9195_Unigene_17766	CDS_16741_Unigene_27837	glutathione-specific gamma-glutamylcyclotransferase 2	2306.92	154.518	0.0669803	-3.90012	0.00454172	Yes	0.172369	No	Down
XP_011089456	CDS_3560_Unigene_7762	CDS_13174_Unigene_22727	U-box domain-containing 33-like	824.5	29.715	0.03604	-4.79426	0.00454095	Yes	0.172369	No	Down
XP_011090758	CDS_36880_Unigene_56672	CDS_390_Unigene_836	probable ATP-dependent DNA helicase CHR12	3891.13	347.071	0.0891954	-3.48689	0.00452201	Yes	0.172369	No	Down
XP_011088787	CDS_9739_Unigene_18571	CDS_8775_Unigene_16184	alpha-L-fucosidase 1	63.9408	1345.49	21.0428	4.39526	0.00452087	Yes	0.172369	No	Up
XP_012851257	CDS_3501_Unigene_7666	CDS_10431_Unigene_18590	probable xyloglucan endotransglucosylase hydrolase 23	7799.09	801.116	0.102719	-3.28322	0.00455428	Yes	0.172415	No	Down
XP_009597949	CDS_33661_Unigene_52349	CDS_31773_Unigene_48676	casein kinase I-like isoform X2	1629.65	87.9564	0.0539726	-4.21163	0.0046053	Yes	0.173913	No	Down
XP_011092099	CDS_24865_Unigene_39831	CDS_20384_Unigene_32840	riboflavin biosynthesis chloroplastic	700.825	23.772	0.03392	-4.88172	0.00464135	Yes	0.174839	No	Down
XP_011086837	CDS_11400_Unigene_21067	CDS_224_Unigene_498	glucose-6-phosphate 1- chloroplastic-like	230.523	2942.97	12.7665	3.67429	0.00469534	Yes	0.176436	No	Up
XP_011082531	CDS_3478_Unigene_7622	CDS_32_Unigene_90	E3 ubiquitin- ligase RF4	1139.16	49.9212	0.043823	-4.51217	0.00478147	Yes	0.178095	No	Down
XP_011097491	CDS_4242_Unigene_9249	CDS_4970_Unigene_9630	PREDICTED: uncharacterized protein LOC105176404	1239.27	57.0528	0.0460373	-4.44105	0.00478643	Yes	0.178095	No	Down
XP_011099420	CDS_15876_Unigene_27422	CDS_13452_Unigene_23125	homeobox-leucine zipper HAT22-like	2942.96	231.777	0.0787564	-3.66646	0.00477177	Yes	0.178095	No	Down
XP_011100550	CDS_40163_Unigene_63633	CDS_7700_Unigene_14443	PREDICTED: uncharacterized protein LOC105178718	1173.65	52.2984	0.0445605	-4.48809	0.00477986	Yes	0.178095	No	Down
XP_015080212	CDS_799_Unigene_1960	CDS_13939_Unigene_23772	CLP protease regulatory subunit mitochondrial-like	181.726	2517.45	13.853	3.79213	0.00482025	Yes	0.178915	No	Up
XP_011080022	CDS_10827_Unigene_20214	CDS_15913_Unigene_26697	poly [ADP-ribose] polymerase 1	2492.85	179.479	0.0719974	-3.79591	0.00487424	Yes	0.180478	No	Down
XP_011092579	CDS_15983_Unigene_27579	CDS_14981_Unigene_25289	PREDICTED: uncharacterized protein LOC105172725 isoform X2	731.954	26.1492	0.0357252	-4.80691	0.00496217	Yes	0.183287	No	Down
XP_011071781	CDS_15127_Unigene_26305	CDS_21659_Unigene_34642	pyridoxine pyridoxamine 5 -phosphate oxidase chloroplastic-like isoform X1	1817.26	109.351	0.0601735	-4.05473	0.00503883	Yes	0.185312	No	Down
XP_012857287	CDS_24504_Unigene_39328	CDS_19110_Unigene_31135	zinc finger 8	127.882	1996.85	15.6148	3.96484	0.00504142	Yes	0.185312	No	Up
XP_011080921	CDS_32899_Unigene_51212	CDS_1268_Unigene_2810	golgin candidate 6	3442.71	301.904	0.0876939	-3.51138	0.00509149	Yes	0.185571	No	Down
XP_011086447	CDS_22221_Unigene_36277	CDS_872_Unigene_2035	paired amphipathic helix Sin3-like 3	1703.69	98.6538	0.0579061	-4.11014	0.00507984	Yes	0.185571	No	Down
XP_011099135	CDS_17976_Unigene_30363	CDS_19805_Unigene_32113	CLK4-associating serine arginine rich	5307.09	538.436	0.101456	-3.30107	0.00509737	Yes	0.185571	No	Down
XP_012858854	CDS_11360_Unigene_21003	CDS_35643_Unigene_55753	glucan endo-1,3-beta-glucosidase-like	220.427	8.3202	0.0377457	-4.72754	0.00507067	Yes	0.185571	No	Down
XP_012854342	CDS_15032_Unigene_26206	CDS_1144_Unigene_2476	UDP-glycosyltransferase 83A1-like	1081.95	47.544	0.0439431	-4.50822	0.00511043	Yes	0.185602	No	Down
XP_012848196	CDS_22130_Unigene_36162	CDS_4743_Unigene_9199	regulatory NPR1-like	790.847	29.715	0.0375737	-4.73413	0.00513068	Yes	0.185892	No	Down
XP_011091721	CDS_22795_Unigene_36997	CDS_27199_Unigene_42253	homeobox-leucine zipper ANTHOCYANINLESS 2-like	2962.31	241.286	0.0814519	-3.61791	0.00518761	Yes	0.187508	No	Down
XP_011079312	CDS_16009_Unigene_27611	CDS_7232_Unigene_13695	pectinesterase 1-like	1267.88	61.8072	0.0487485	-4.3585	0.00526864	Yes	0.189648	No	Down
XP_011083865	CDS_11813_Unigene_21678	CDS_1733_Unigene_3783	dihydroflavonol-4-reductase isoform X1	760.559	28.5264	0.0375072	-4.73669	0.00528983	Yes	0.189648	No	Down
XP_011099619	CDS_6222_Unigene_12635	CDS_10107_Unigene_18135	nucleolar 6 isoform X3	3021.2	250.795	0.0830115	-3.59054	0.00530419	Yes	0.189648	No	Down
XP_012831180	CDS_36691_Unigene_56450	CDS_20110_Unigene_32481	nucleobase-ascorbate transporter 6-like	5277.64	540.813	0.102473	-3.28669	0.00528117	Yes	0.189648	No	Down
XP_012858129	CDS_36172_Unigene_55715	CDS_12179_Unigene_21192	peptide-N4-(N-acetyl-beta-glucosaminyl)asparagine amidase A	7046.95	752.384	0.106767	-3.22746	0.00530931	Yes	0.189648	No	Down
XP_011082954	CDS_27544_Unigene_43568	CDS_24345_Unigene_38315	hexaprenyldihydroxybenzoate mitochondrial	734.478	27.3378	0.0372207	-4.74775	0.00536274	Yes	0.19066	No	Down
XP_011088331	CDS_16225_Unigene_27984	CDS_891_Unigene_2062	probable E3 ubiquitin- ligase ARI2 isoform X1	1118.12	51.1098	0.0457104	-4.45133	0.00535229	Yes	0.19066	No	Down
XP_011084167	CDS_23912_Unigene_38514	CDS_30414_Unigene_46778	solute carrier family 35 member F1-like isoform X2	2411.24	177.101	0.0734482	-3.76713	0.00541018	Yes	0.191036	No	Down
XP_012828756	CDS_36146_Unigene_55671	CDS_29850_Unigene_45980	PREDICTED: uncharacterized protein LOC105949984	1064.28	47.544	0.0446725	-4.48447	0.00539327	Yes	0.191036	No	Down
XP_011072662	CDS_34442_Unigene_53414	CDS_9802_Unigene_17694	PREDICTED: uncharacterized protein LOC105157864 isoform X1	33.653	837.963	24.9001	4.63808	0.00541107	Yes	0.191036	No	Up
XP_011093464	CDS_345_Unigene_751	CDS_7692_Unigene_14431	ABC transporter C family member 15	16.8265	487.326	28.9618	4.85608	0.00543705	Yes	0.191508	No	Up
XP_011094123	CDS_37307_Unigene_57263	CDS_12278_Unigene_21373	calcium-transporting ATPase plasma membrane-type isoform X1	1815.58	112.917	0.0621933	-4.0071	0.00546869	Yes	0.191732	No	Down
XP_012832498	CDS_26168_Unigene_41598	CDS_6564_Unigene_12532	benzyl alcohol O-benzoyltransferase-like	683.157	24.9606	0.0365371	-4.77449	0.00546295	Yes	0.191732	No	Down
XP_011098901	CDS_585_Unigene_1295	CDS_7782_Unigene_14566	PREDICTED: uncharacterized protein LOC105177434	2539.96	194.93	0.0767453	-3.70378	0.00561356	Yes	0.194596	No	Down
XP_012842472	CDS_24420_Unigene_39215	CDS_12819_Unigene_22184	GDSL esterase lipase LTL1-like	6372.2	684.633	0.107441	-3.21839	0.00560772	Yes	0.194596	No	Down
XP_012847251	CDS_11867_Unigene_21754	CDS_2480_Unigene_5215	basic leucine zipper 9	1214.87	59.43	0.0489186	-4.35347	0.00561023	Yes	0.194596	No	Down
XP_011070535	CDS_17203_Unigene_29321	CDS_16599_Unigene_27609	mediator of RNA polymerase II transcription subunit 27	97.5938	1648.59	16.8923	4.0783	0.00558344	Yes	0.194596	No	Up
XP_011095600	CDS_17532_Unigene_29750	CDS_14934_Unigene_25223	fructose-bisphosphate cytoplasmic isozyme 1	2313.65	20462.9	8.84445	3.14477	0.00561445	Yes	0.194596	No	Up
XP_011082674	CDS_219_Unigene_475	CDS_8496_Unigene_15723	3-deoxy-manno-octulosonate mitochondrial	58.0515	1188.6	20.4749	4.35579	0.00565607	Yes	0.195592	No	Up
XP_011079135	CDS_2021_Unigene_4610	CDS_6344_Unigene_12186	PREDICTED: metacaspase-9	302.036	10.6974	0.0354176	-4.81939	0.00573175	Yes	0.195708	No	Down
XP_011072373	CDS_20075_Unigene_33228	CDS_26821_Unigene_41740	homeobox-leucine zipper GLABRA 2	88.3392	1542.8	17.4645	4.12636	0.0056955	Yes	0.195708	No	Up
XP_011078363	CDS_32281_Unigene_50343	CDS_30631_Unigene_47097	probable ADP-ribosylation factor GTPase-activating AGD14	55.5275	1150.56	20.7206	4.373	0.00572613	Yes	0.195708	No	Up
XP_011083501	CDS_10583_Unigene_19851	CDS_27909_Unigene_43249	IQ-DOMAIN 32	144.708	2093.12	14.4645	3.85444	0.00569228	Yes	0.195708	No	Up
XP_011094291	CDS_10877_Unigene_20300	CDS_26045_Unigene_40705	transcription initiation factor TFIID subunit 2 isoform X1	95.0699	1611.74	16.9532	4.08349	0.005726	Yes	0.195708	No	Up
XP_012829818	CDS_9159_Unigene_17713	CDS_4259_Unigene_8363	PREDICTED: uncharacterized protein LOC105950974	678.109	6285.32	9.26889	3.2124	0.00573677	Yes	0.195708	No	Up
XP_011077003	CDS_13261_Unigene_23680	CDS_130_Unigene_324	patatin 6	1336.87	70.1274	0.0524565	-4.25273	0.00577466	Yes	0.196441	No	Down
XP_011093610	CDS_28367_Unigene_44746	CDS_17358_Unigene_28722	cyclin-dependent kinase F-1	1707.05	104.597	0.0612734	-4.0286	0.00579709	Yes	0.196441	No	Down
XP_012835351	CDS_22976_Unigene_37258	CDS_24712_Unigene_38823	ATP-dependent Clp protease proteolytic subunit-related chloroplastic	1256.94	11351.1	9.03075	3.17485	0.00578688	Yes	0.196441	No	Up
XP_011075730	CDS_8075_Unigene_15937	CDS_2528_Unigene_5295	PREDICTED: uncharacterized protein LOC105160162 isoform X1	689.046	26.1492	0.0379498	-4.71976	0.00584446	Yes	0.196664	No	Down
XP_011075891	CDS_13712_Unigene_24313	CDS_9885_Unigene_17808	two-component response regulator-like APRR9	180.044	2390.27	13.2761	3.73076	0.00584069	Yes	0.196664	No	Up
XP_011084165	CDS_32960_Unigene_51296	CDS_28373_Unigene_43922	PREDICTED: uncharacterized protein At3g49140 isoform X3	25.2398	662.05	26.2304	4.71317	0.00585062	Yes	0.196664	No	Up
XP_011085891	CDS_9187_Unigene_17758	CDS_21401_Unigene_34325	pre-mRNA-splicing factor 38B-like	114.42	1795.97	15.6963	3.97235	0.00585549	Yes	0.196664	No	Up
XP_011089500	CDS_1998_Unigene_4572	CDS_11816_Unigene_20687	scarecrow 30	1212.35	60.6186	0.0500009	-4.3219	0.00590014	Yes	0.197291	No	Down
XP_011089486	CDS_30779_Unigene_48107	CDS_24578_Unigene_38636	telomere repeat-binding 5	169.107	2290.43	13.5443	3.75962	0.00589869	Yes	0.197291	No	Up
XP_011079717	CDS_30975_Unigene_48411	CDS_1900_Unigene_4047	PREDICTED: uncharacterized protein LOC105163168	661.282	24.9606	0.0377457	-4.72754	0.00594709	Yes	0.197988	No	Down
XP_012842502	CDS_10970_Unigene_20425	CDS_24780_Unigene_38901	PREDICTED: uncharacterized protein LOC105962724	17.6678	488.514	27.6499	4.7892	0.00593899	Yes	0.197988	No	Up
XP_012849560	CDS_37559_Unigene_57631	CDS_24418_Unigene_38415	phospholipid-transporting ATPase 8	49.6382	1055.48	21.2634	4.4103	0.00596113	Yes	0.198022	No	Up
XP_011081844	CDS_18611_Unigene_31219	CDS_11559_Unigene_20282	PREDICTED: uncharacterized protein LOC105164782	1831.57	118.86	0.0648952	-3.94574	0.005984	Yes	0.198199	No	Down
XP_011090683	CDS_15939_Unigene_27514	CDS_20846_Unigene_33527	PREDICTED: myosin-9-like	71.5127	1334.8	18.6652	4.22228	0.00599258	Yes	0.198199	No	Up
XP_011075158	CDS_36964_Unigene_56791	CDS_8415_Unigene_15587	PHOTOPERIOD-INDEPENDENT EARLY FLOWERING 1 isoform X2	1157.66	57.0528	0.0492827	-4.34278	0.0060449	Yes	0.198764	No	Down
XP_011084508	CDS_8111_Unigene_15986	CDS_20239_Unigene_32645	probable pectinesterase pectinesterase inhibitor 61	1124.85	54.6756	0.0486069	-4.3627	0.00606487	Yes	0.198764	No	Down
XP_011085983	CDS_33049_Unigene_51437	CDS_7242_Unigene_13717	exportin-7 isoform X1	786.64	32.0922	0.0407965	-4.61541	0.00607126	Yes	0.198764	No	Down
XP_011087684	CDS_13532_Unigene_24057	CDS_28137_Unigene_43585	PREDICTED: uncharacterized protein LOC105169093	2052.84	143.821	0.0700595	-3.83528	0.00608823	Yes	0.198764	No	Down
XP_011098617	CDS_19100_Unigene_31890	CDS_10865_Unigene_19215	protease Do-like chloroplastic	1490.83	85.5792	0.0574037	-4.12271	0.00607938	Yes	0.198764	No	Down
XP_011070024	CDS_5635_Unigene_11702	CDS_17259_Unigene_28567	PREDICTED: uncharacterized protein LOC105155775	65.6234	1258.73	19.1811	4.26161	0.00608523	Yes	0.198764	No	Up
XP_012854855	CDS_10755_Unigene_20108	CDS_28598_Unigene_44275	NRT1 PTR FAMILY -like	127.04	1894.63	14.9136	3.89856	0.00612397	Yes	0.199502	No	Up
XP_011093073	CDS_25673_Unigene_40905	CDS_23198_Unigene_36756	PREDICTED: LOW QUALITY PROTEIN: uncharacterized protein LOC105173116	953.222	42.7896	0.0448894	-4.47748	0.00613952	Yes	0.19958	No	Down
XP_011096785	CDS_25953_Unigene_41278	CDS_2168_Unigene_4641	E3 ubiquitin- ligase BOI-like	1385.66	77.259	0.0557559	-4.16473	0.0063051	Yes	0.204525	No	Down
XP_011099911	CDS_24072_Unigene_38738	CDS_17349_Unigene_28711	plant intracellular Ras-group-related LRR 4-like	1755.85	114.106	0.064986	-3.94373	0.0063969	Yes	0.20706	No	Down
XP_011084407	CDS_21998_Unigene_35970	CDS_19432_Unigene_31590	methyl- -binding domain-containing 13-like	455.999	16.6404	0.0364922	-4.77627	0.00642616	Yes	0.207565	No	Down
XP_011069396	CDS_22963_Unigene_37238	CDS_6767_Unigene_12857	PREDICTED: protein DEK-like	1089.52	9518.31	8.73626	3.12702	0.00645915	Yes	0.208188	No	Up
XP_011089537	CDS_34494_Unigene_53500	CDS_29236_Unigene_45142	probable inactive receptor kinase At5g58300 isoform X1	1509.34	90.3336	0.0598498	-4.06251	0.00657423	Yes	0.209232	No	Down
XP_011093877	CDS_12563_Unigene_22733	CDS_14202_Unigene_24161	PREDICTED: RRP12-like protein	2760.39	235.343	0.085257	-3.55204	0.0065589	Yes	0.209232	No	Down
XP_011075582	CDS_29256_Unigene_45959	CDS_20512_Unigene_33040	alpha-1,4 glucan phosphorylase L-2 chloroplastic amyloplastic-like	3318.19	27506.6	8.28963	3.05131	0.00655785	Yes	0.209232	No	Up
XP_011081988	CDS_24460_Unigene_39280	CDS_16839_Unigene_27972	probable folate-biopterin transporter 2	35.3357	813.002	23.008	4.52406	0.00652877	Yes	0.209232	No	Up
XP_011084696	CDS_33417_Unigene_52020	CDS_30316_Unigene_46645	V-type proton ATPase subunit H-like	368.501	3720.32	10.0958	3.33569	0.00655766	Yes	0.209232	No	Up
XP_011097929	CDS_16881_Unigene_28886	CDS_19398_Unigene_31526	PREDICTED: kinesin-3	206.966	2540.04	12.2727	3.61738	0.00656973	Yes	0.209232	No	Up
XP_011079284	CDS_31603_Unigene_49275	CDS_24167_Unigene_38079	adagio 1-like	1881.21	129.557	0.0688693	-3.85999	0.00664547	Yes	0.211056	No	Down
XP_011071869	CDS_18008_Unigene_30417	CDS_12914_Unigene_22339	PREDICTED: uncharacterized protein LOC105157223	1950.19	137.878	0.0706994	-3.82216	0.00672034	Yes	0.212533	No	Down
XP_011071506	CDS_8216_Unigene_16140	CDS_12314_Unigene_21417	PREDICTED: uncharacterized protein At4g15545	354.198	3599.08	10.1612	3.345	0.00671136	Yes	0.212533	No	Up
XP_011073815	CDS_11814_Unigene_21679	CDS_6202_Unigene_12008	disease resistance At1g50180	393.741	3874.84	9.84109	3.29882	0.00673398	Yes	0.212533	No	Up
XP_011098712	CDS_25116_Unigene_40191	CDS_1528_Unigene_3473	membrane-anchored ubiquitin-fold 1	671.378	27.3378	0.0407189	-4.61816	0.00681771	Yes	0.2139	No	Down
XP_012857055	CDS_40394_Unigene_63963	CDS_147_Unigene_380	bifunctional epoxide hydrolase 2-like	2287.57	178.29	0.0779387	-3.68152	0.00681955	Yes	0.2139	No	Down
XP_011074943	CDS_30004_Unigene_46978	CDS_27912_Unigene_43254	PREDICTED: uncharacterized protein LOC105159540 isoform X2	104.324	1631.95	15.643	3.96745	0.0067978	Yes	0.2139	No	Up
XP_011082725	CDS_11986_Unigene_21937	CDS_14620_Unigene_24767	ras-related Rab11B	201.918	2472.29	12.244	3.614	0.00687794	Yes	0.215287	No	Up
XP_012849260	CDS_27582_Unigene_43637	CDS_3314_Unigene_6622	sphingosine kinase 1	809.356	35.658	0.0440573	-4.50448	0.00690494	Yes	0.215687	No	Down
XP_012843999	CDS_8751_Unigene_17055	CDS_2263_Unigene_4815	desiccation-related PCC27-45-like	1474.84	89.145	0.0604436	-4.04827	0.00694641	Yes	0.216219	No	Down
XP_011082360	CDS_2565_Unigene_5952	CDS_3192_Unigene_6389	29 kDa chloroplastic	1163.55	9941.45	8.54404	3.09492	0.00696345	Yes	0.216219	No	Up
XP_011089575	CDS_14723_Unigene_25815	CDS_13402_Unigene_23051	ubiquitin carboxyl-terminal hydrolase 5	63.9408	1189.79	18.6077	4.21782	0.0069647	Yes	0.216219	No	Up
XP_011073492	CDS_4919_Unigene_10479	CDS_2510_Unigene_5269	PREDICTED: uncharacterized protein LOC105158432	1103.82	9398.26	8.5143	3.08989	0.00703393	Yes	0.217054	No	Up
XP_011081596	CDS_26802_Unigene_42488	CDS_26778_Unigene_41679	copper-transporting ATPase chloroplastic	233.047	2696.93	11.5725	3.53262	0.00703373	Yes	0.217054	No	Up
XP_011082337	CDS_4856_Unigene_10372	CDS_4432_Unigene_8641	metal-nicotianamine transporter YSL1-like isoform X1	599.866	5343.94	8.90857	3.15519	0.00703449	Yes	0.217054	No	Up
XP_011085995	CDS_36891_Unigene_56690	CDS_14218_Unigene_24176	SCAR1-like isoform X2	1118.12	58.2414	0.0520886	-4.26289	0.00708027	Yes	0.217665	No	Down
XP_011101650	CDS_39192_Unigene_60801	CDS_4088_Unigene_8093	PREDICTED: uncharacterized protein LOC105179697	2916.04	263.869	0.090489	-3.46611	0.00710918	Yes	0.217665	No	Down
XP_011071653	CDS_40252_Unigene_63740	CDS_4561_Unigene_8863	PREDICTED: uncharacterized protein LOC105157054	5.88928	65.373	11.1003	3.47253	0.00708304	Yes	0.217665	No	Up
XP_011072682	CDS_34694_Unigene_53784	CDS_30149_Unigene_46400	AT-rich interactive domain-containing 4	376.914	3707.24	9.83578	3.29804	0.00711163	Yes	0.217665	No	Up
XP_011093415	CDS_22764_Unigene_36954	CDS_6035_Unigene_11753	PREDICTED: uncharacterized protein LOC105173395 isoform X2	636.884	26.1492	0.041058	-4.60619	0.00715348	Yes	0.218389	No	Down
XP_012828106	CDS_36870_Unigene_56650	CDS_7094_Unigene_13441	PREDICTED: villin-3-like	2111.73	160.461	0.0759856	-3.71813	0.00716405	Yes	0.218389	No	Down
XP_011077581	CDS_566_Unigene_1267	CDS_5158_Unigene_9966	PREDICTED: laccase-4-like	41.225	873.621	21.1915	4.40542	0.00724884	Yes	0.22053	No	Up
XP_011072776	CDS_31192_Unigene_48715	CDS_27552_Unigene_42772	probable mitochondrial adenine nucleotide transporter BTL1	62.2581	1152.94	18.5187	4.21091	0.00729249	Yes	0.220973	No	Up
XP_011092018	CDS_14759_Unigene_25860	CDS_11221_Unigene_19754	PREDICTED: uncharacterized protein LOC105172335 isoform X1	19.3505	481.383	24.877	4.63674	0.00729043	Yes	0.220973	No	Up
XP_011097593	CDS_16367_Unigene_28171	CDS_21191_Unigene_34029	ethylene-responsive transcription factor RAP2-4	4332.83	471.874	0.108907	-3.19884	0.00737429	Yes	0.222121	No	Down
XP_011075080	CDS_30553_Unigene_47780	CDS_21019_Unigene_33764	osmotic avoidance abnormal 3-like	632.677	5524.61	8.73212	3.12633	0.0073664	Yes	0.222121	No	Up
XP_011080549	CDS_18645_Unigene_31251	CDS_18563_Unigene_30374	PREDICTED: uncharacterized protein LOC105163785	81.6086	1369.27	16.7785	4.06854	0.00736383	Yes	0.222121	No	Up
XP_011086848	CDS_12224_Unigene_22241	CDS_2590_Unigene_5399	NAC transcription factor 25	198.553	2402.16	12.0983	3.59674	0.00739529	Yes	0.222313	No	Up
XP_011071702	CDS_10094_Unigene_19122	CDS_2236_Unigene_4766	cyclic dof factor 3-like	55.5275	1062.61	19.1366	4.25826	0.00741136	Yes	0.222355	No	Up
XP_011080876	CDS_39398_Unigene_61545	CDS_8438_Unigene_15620	cation H(+) antiporter 18-like	8.41326	127.18	15.1166	3.91806	0.00744373	Yes	0.222886	No	Up
XP_011080563	CDS_19682_Unigene_32683	CDS_9354_Unigene_17019	formin 1	1707.89	116.483	0.0682027	-3.87403	0.00747322	Yes	0.222957	No	Down
XP_011070775	CDS_34490_Unigene_53496	CDS_1229_Unigene_2724	probable leucine-rich repeat receptor kinase At1g68400	584.722	5144.26	8.79779	3.13714	0.00747547	Yes	0.222957	No	Up
XP_011072274	CDS_29237_Unigene_45923	CDS_25587_Unigene_40060	gibberellin 3-beta-dioxygenase 1-like	818.61	38.0352	0.0464631	-4.42777	0.00760427	Yes	0.22324	No	Down
XP_011083101	CDS_36972_Unigene_56808	CDS_33177_Unigene_50550	CLIP-associated isoform X1	5084.98	578.848	0.113835	-3.13498	0.00754081	Yes	0.22324	No	Down
XP_011083814	CDS_25349_Unigene_40487	CDS_4540_Unigene_8805	PREDICTED: uncharacterized protein LOC105166230 isoform X2	1590.95	104.597	0.065745	-3.92698	0.00758244	Yes	0.22324	No	Down
XP_011086777	CDS_28789_Unigene_45288	CDS_144_Unigene_377	beta-hexosaminidase 2	763.083	34.4694	0.0451712	-4.46845	0.00761644	Yes	0.22324	No	Down
XP_011091606	CDS_28774_Unigene_45267	CDS_12744_Unigene_22061	uncharacterized GPI-anchored At1g61900	1666.67	112.917	0.0677502	-3.88363	0.00761731	Yes	0.22324	No	Down
XP_011097508	CDS_4891_Unigene_10423	CDS_16889_Unigene_28055	probable glucan 1,3-beta-glucosidase A	188.457	9.5088	0.050456	-4.30883	0.00760396	Yes	0.22324	No	Down
XP_011074395	CDS_36250_Unigene_55825	CDS_32815_Unigene_50073	polyadenylate-binding 8-like	1843.35	15214.1	8.25351	3.04501	0.0075279	Yes	0.22324	No	Up
XP_011080886	CDS_33390_Unigene_51994	CDS_30154_Unigene_46407	PREDICTED: uncharacterized protein LOC105164037	165.741	2126.4	12.8297	3.68141	0.00753649	Yes	0.22324	No	Up
XP_012844854	CDS_2742_Unigene_6312	CDS_17633_Unigene_29106	G-type lectin S-receptor-like serine threonine- kinase At4g27290	96.7525	1511.9	15.6265	3.96592	0.00758449	Yes	0.22324	No	Up
XP_011096790	CDS_14340_Unigene_25239	CDS_131_Unigene_325	PHLOEM PROTEIN 2-LIKE A9	1178.7	65.373	0.055462	-4.17236	0.00763966	Yes	0.223464	No	Down
XP_011076581	CDS_33186_Unigene_51643	CDS_2159_Unigene_4627	probable inactive serine threonine- kinase scy1 isoform X1	2412.92	203.251	0.0842342	-3.56945	0.00773659	Yes	0.22489	No	Down
XP_011080468	CDS_18173_Unigene_30623	CDS_24102_Unigene_37970	PREDICTED: uncharacterized protein LOC105163723	138.819	1888.68	13.6054	3.76611	0.007705	Yes	0.22489	No	Up
XP_011086679	CDS_3162_Unigene_7072	CDS_4871_Unigene_9475	-tyrosine-phosphatase MKP1-like isoform X2	65.6234	1171.96	17.8589	4.15857	0.00774769	Yes	0.22489	No	Up
XP_011101302	CDS_7553_Unigene_14991	CDS_4663_Unigene_9032	cell division cycle 48 homolog	31.1291	697.708	22.4134	4.48629	0.00771929	Yes	0.22489	No	Up
XP_011087215	CDS_17274_Unigene_29413	CDS_25853_Unigene_40436	NRT1 PTR FAMILY -like	60.5755	1110.15	18.3268	4.19588	0.00776664	Yes	0.22501	No	Up
XP_011071105	CDS_4460_Unigene_9593	CDS_15835_Unigene_26575	CRS2-associated factor chloroplastic	166.583	2114.52	12.6935	3.66602	0.00780275	Yes	0.225626	No	Up
XP_011087390	CDS_1048_Unigene_2358	CDS_7084_Unigene_13428	PREDICTED: uncharacterized protein LOC105168894	466.936	19.0176	0.0407285	-4.61782	0.00785213	Yes	0.226622	No	Down
XP_011095474	CDS_9788_Unigene_18646	CDS_7489_Unigene_14119	PREDICTED: syntaxin-52-like	1123.17	61.8072	0.0550292	-4.18366	0.00792255	Yes	0.227788	No	Down
XP_012831128	CDS_34212_Unigene_53096	CDS_26017_Unigene_40666	PREDICTED: uncharacterized protein LOC105952158	422.346	3920	9.2815	3.21436	0.00790826	Yes	0.227788	No	Up
XP_012845174	CDS_27410_Unigene_43380	CDS_25692_Unigene_40216	aspartic ase 1 isoform X1	35.3357	758.327	21.4606	4.42362	0.00794097	Yes	0.227886	No	Up
XP_012837214	CDS_14563_Unigene_25592	CDS_2517_Unigene_5274	hippocampus abundant transcript 1	22.7158	533.681	23.4938	4.55421	0.00796224	Yes	0.228065	No	Up
XP_012829590	CDS_10387_Unigene_19585	CDS_29908_Unigene_46054	tyrosine- kinase CSK-like	36.177	769.024	21.2573	4.40988	0.0080092	Yes	0.228979	No	Up
XP_011096269	CDS_38709_Unigene_59659	CDS_7844_Unigene_14662	SWI SNF-related matrix-associated actin-dependent regulator of chromatin subfamily A member 3-like 1 isoform X2	10.0959	179.479	17.7773	4.15197	0.00814308	Yes	0.232369	No	Up
XP_012849061	CDS_34603_Unigene_53688	CDS_31816_Unigene_48726	subtilisin-like protease	14.3025	328.054	22.9367	4.51959	0.00819471	Yes	0.233403	No	Up
XP_011089502	CDS_40249_Unigene_63736	CDS_8519_Unigene_15767	scarecrow 14	1170.28	67.7502	0.0578921	-4.11049	0.00844598	Yes	0.240109	No	Down
XP_011097705	CDS_22137_Unigene_36171	CDS_25483_Unigene_39915	probable amino acid permease 7	60.5755	1080.44	17.8362	4.15674	0.00846416	Yes	0.240177	No	Up
XP_011092433	CDS_34668_Unigene_53753	CDS_2914_Unigene_5940	PREDICTED: BRCA1-associated protein	10.0959	169.97	16.8355	4.07343	0.0085725	Yes	0.242797	No	Up
XP_011079012	CDS_20148_Unigene_33307	CDS_21532_Unigene_34489	glutamate receptor	31.9704	681.068	21.3031	4.41299	0.00866318	Yes	0.2441	No	Up
XP_011081033	CDS_36932_Unigene_56752	CDS_33107_Unigene_50441	PREDICTED: transportin-1-like	116.103	1635.51	14.0867	3.81627	0.00866676	Yes	0.2441	No	Up
XP_011092569	CDS_7182_Unigene_14311	CDS_16151_Unigene_27018	PREDICTED: uncharacterized protein LOC105172718 isoform X3	84.1326	1333.61	15.8513	3.98653	0.00864588	Yes	0.2441	No	Up
XP_011090965	CDS_32719_Unigene_50972	CDS_28108_Unigene_43550	probable histone-arginine methyltransferase	2210.16	186.61	0.0844327	-3.56605	0.00877295	Yes	0.246178	No	Down
XP_012837258	CDS_30011_Unigene_46990	CDS_27338_Unigene_42464	receptor kinase At5g39000 isoform X1	724.382	34.4694	0.0475846	-4.39336	0.00876894	Yes	0.246178	No	Down
XP_011083044	CDS_12764_Unigene_22983	CDS_8133_Unigene_15146	60S ribosomal L14-2	7031.8	875.998	0.124577	-3.0049	0.00879469	Yes	0.246332	No	Down
XP_011095521	CDS_1659_Unigene_3814	CDS_14728_Unigene_24923	ABC transporter C family member 3-like	12.6199	259.115	20.5322	4.35982	0.00883119	Yes	0.246899	No	Up
XP_012831444	CDS_22850_Unigene_37079	CDS_27729_Unigene_43014	ECERIFERUM 1-like isoform X1	534.242	4559.47	8.53446	3.0933	0.00886456	Yes	0.247377	No	Up
XP_012837249	CDS_35298_Unigene_54620	CDS_14510_Unigene_24588	ubiquitin domain-containing DSK2b-like isoform X2	2073.03	169.97	0.0819911	-3.60839	0.00889153	Yes	0.247674	No	Down
XP_011076352	CDS_28727_Unigene_45209	CDS_15451_Unigene_26012	glycerol-3-phosphate transporter 1	1174.49	70.1274	0.0597087	-4.06591	0.00898969	Yes	0.249493	No	Down
XP_011092105	CDS_12664_Unigene_22880	CDS_4209_Unigene_8281	probable phosphatase 2C 34	470.301	4112.56	8.74451	3.12838	0.00898653	Yes	0.249493	No	Up
XP_012836394	CDS_29537_Unigene_46314	CDS_29139_Unigene_44998	glycosyltransferase-like KOBITO 1	25.2398	551.51	21.8508	4.44962	0.00907482	Yes	0.251396	No	Up
XP_011096823	CDS_35167_Unigene_54422	CDS_7691_Unigene_14429	CHROMATIN REMODELING 4	1116.44	65.373	0.0585549	-4.09407	0.00909926	Yes	0.251614	No	Down
XP_011081343	CDS_3686_Unigene_7977	CDS_15216_Unigene_25663	PREDICTED: uncharacterized protein LOC105164396	115.262	8.3202	0.0721853	-3.79215	0.00918107	Yes	0.25241	No	Down
XP_012838001	CDS_13802_Unigene_24449	CDS_10131_Unigene_18174	coiled-coil domain-containing 132	2237.93	193.742	0.086572	-3.52996	0.00919174	Yes	0.25241	No	Down
XP_012851695	CDS_35355_Unigene_54709	CDS_27310_Unigene_42416	PREDICTED: uncharacterized protein LOC105971389	615.009	28.5264	0.0463837	-4.43024	0.00920484	Yes	0.25241	No	Down
XP_011076071	CDS_15799_Unigene_27323	CDS_13434_Unigene_23100	ATP-dependent RNA helicase DHX36	42.9076	826.077	19.2524	4.26697	0.00924445	Yes	0.25241	No	Up
XP_011082588	CDS_36313_Unigene_55924	CDS_32373_Unigene_49467	transport Sec24-like At3g07100	42.9076	826.077	19.2524	4.26697	0.00924445	Yes	0.25241	No	Up
XP_011088308	CDS_1503_Unigene_3248	CDS_9844_Unigene_17759	flavonol synthase flavanone 3-hydroxylase-like	36.177	729.8	20.173	4.33436	0.00923074	Yes	0.25241	No	Up
XP_011093988	CDS_10630_Unigene_19914	CDS_23562_Unigene_37283	PREDICTED: uncharacterized protein LOC105173804	286.051	2893.05	10.1138	3.33825	0.00915036	Yes	0.25241	No	Up
XP_011075684	CDS_23323_Unigene_37683	CDS_21634_Unigene_34611	probable 6-phosphogluconolactonase 2	3082.62	317.356	0.10295	-3.27998	0.00936867	Yes	0.255343	No	Down
XP_012836911	CDS_25441_Unigene_40625	CDS_23721_Unigene_37494	D-3-phosphoglycerate dehydrogenase chloroplastic	364.294	3382.75	9.28578	3.21502	0.00940873	Yes	0.255975	No	Up
XP_011076800	CDS_11635_Unigene_21372	CDS_20815_Unigene_33482	ribulose bisphosphate carboxylase oxygenase chloroplastic isoform X2	6154.3	776.156	0.126116	-2.98718	0.00952279	Yes	0.257798	No	Down
XP_011073829	CDS_695_Unigene_1661	CDS_2989_Unigene_6051	UDP-glycosyltransferase 92A1-like	50.4796	916.41	18.1541	4.18222	0.00954369	Yes	0.257798	No	Up
XP_011084497	CDS_30072_Unigene_47080	CDS_32488_Unigene_49618	cyclic nucleotide-gated ion channel 1-like	204.442	2297.56	11.2382	3.49034	0.00949973	Yes	0.257798	No	Up
XP_011096020	CDS_4513_Unigene_9718	CDS_12410_Unigene_21570	PREDICTED: uncharacterized protein LOC105175311	10.0959	152.141	15.0695	3.91356	0.0095328	Yes	0.257798	No	Up
XP_011073382	CDS_15812_Unigene_27339	CDS_5450_Unigene_10582	DEAD-box ATP-dependent RNA helicase 35	1883.73	150.952	0.0801347	-3.64143	0.00957993	Yes	0.258318	No	Down
XP_011085729	CDS_1381_Unigene_3020	CDS_10500_Unigene_18695	PREDICTED: cyclin-U4-1	982.669	55.8642	0.0568495	-4.13671	0.0097057	Yes	0.260783	No	Down
XP_011093497	CDS_12397_Unigene_22490	CDS_4593_Unigene_8947	PREDICTED: uncharacterized protein At5g05190	43.749	823.7	18.8279	4.2348	0.00969273	Yes	0.260783	No	Up
XP_011070225	CDS_12214_Unigene_22225	CDS_9276_Unigene_16918	tobamovirus multiplication 2A	2498.74	234.154	0.0937089	-3.41567	0.00972312	Yes	0.260789	No	Down
XP_012858958	CDS_4927_Unigene_10498	CDS_33994_Unigene_51690	ATP-dependent Clp protease proteolytic subunit-related chloroplastic	731.112	5799.18	7.93199	2.98768	0.00976212	Yes	0.261373	No	Up
XP_011101924	CDS_26036_Unigene_41421	CDS_28967_Unigene_44781	MACPF domain-containing CAD1	25.2398	531.304	21.0503	4.39577	0.00984928	Yes	0.263243	No	Up
XP_012838395	CDS_19817_Unigene_32873	CDS_21358_Unigene_34260	sn1-specific diacylglycerol lipase alpha-like	15.1439	311.413	20.5636	4.36202	0.00989713	Yes	0.264057	No	Up
XP_007047876	CDS_729_Unigene_1767	CDS_36387_Unigene_57424	Peroxidase superfamily	47.9556	870.055	18.1429	4.18134	0.00999263	Yes	0.264283	No	Up
XP_011074709	CDS_17942_Unigene_30320	CDS_6346_Unigene_12188	zeaxanthin chloroplastic-like	51.3209	912.845	17.787	4.15275	0.00998698	Yes	0.264283	No	Up
XP_011084015	CDS_1666_Unigene_3830	CDS_28098_Unigene_43537	two-component response regulator ARR12-like	25.2398	528.927	20.9561	4.3893	0.00994536	Yes	0.264283	No	Up
XP_011085248	CDS_16558_Unigene_28411	CDS_21547_Unigene_34507	nucleolar GTP-binding 1 isoform X1	217.903	2368.88	10.8712	3.44244	0.00993674	Yes	0.264283	No	Up
XP_011098857	CDS_2167_Unigene_4881	CDS_5176_Unigene_9996	calcium-binding partial	10.0959	145.009	14.3632	3.8443	0.00999258	Yes	0.264283	No	Up
XP_011087717	CDS_23071_Unigene_37374	CDS_5508_Unigene_10690	PREDICTED: uncharacterized protein LOC105169116	1898.87	155.707	0.0819995	-3.60824	0.0100173	Yes	0.264474	No	Down
XP_011096832	CDS_28184_Unigene_44477	CDS_27928_Unigene_43282	phenylalanine--tRNA chloroplastic mitochondrial	781.592	6096.33	7.79989	2.96345	0.0100959	Yes	0.266088	No	Up
XP_011096737	CDS_23361_Unigene_37750	CDS_22529_Unigene_35843	probable ribose-5-phosphate isomerase chloroplastic	22.7158	475.44	20.9299	4.38749	0.0101685	Yes	0.267536	No	Up
XP_011072823	CDS_37197_Unigene_57121	CDS_1821_Unigene_3922	flavin-containing monooxygenase FMO GS-OX-like 9	433.283	20.2062	0.0466351	-4.42244	0.0101939	Yes	0.267739	No	Down
XP_011096202	CDS_39315_Unigene_61027	CDS_82_Unigene_176	F-box At1g61340-like	59.7342	1005.56	16.8338	4.07329	0.0102551	Yes	0.268883	No	Up
XP_012840812	CDS_31335_Unigene_48882	CDS_22734_Unigene_36131	TRANSPARENT TESTA 12-like	26.9224	551.51	20.4852	4.35651	0.0102778	Yes	0.269013	No	Up
XP_012851957	CDS_2783_Unigene_6364	CDS_2931_Unigene_5963	pentatricopeptide repeat-containing chloroplastic	40.3837	759.515	18.8075	4.23324	0.0103223	Yes	0.269712	No	Up
XP_011098069	CDS_5828_Unigene_12012	CDS_12245_Unigene_21302	PREDICTED: uncharacterized protein LOC105176840 isoform X1	697.459	35.658	0.0511255	-4.28981	0.0103429	Yes	0.269786	No	Down
XP_011094501	CDS_16560_Unigene_28415	CDS_6550_Unigene_12507	serine threonine phosphatase 2A 57 kDa regulatory subunit B beta isoform	727.747	38.0352	0.0522643	-4.25803	0.0104994	Yes	0.272932	No	Down
XP_011097583	CDS_38365_Unigene_58732	CDS_7244_Unigene_13720	PREDICTED: uncharacterized protein LOC105176468	5694.94	733.366	0.128775	-2.95707	0.0104834	Yes	0.272932	No	Down
XP_012831606	CDS_15836_Unigene_27360	CDS_18611_Unigene_30447	PREDICTED: uncharacterized protein LOC105952585	347.468	16.6404	0.0478905	-4.38412	0.0105338	Yes	0.273357	No	Down
XP_012834406	CDS_33755_Unigene_52502	CDS_28546_Unigene_44191	gamma-tubulin complex component 3	30.2877	601.431	19.8573	4.31159	0.0105864	Yes	0.274254	No	Up
XP_011074207	CDS_8920_Unigene_17326	CDS_12445_Unigene_21626	cytochrome c oxidase subunit 6b-1	3534.41	405.313	0.114676	-3.12436	0.0106489	Yes	0.2752	No	Down
XP_011076421	CDS_15425_Unigene_26772	CDS_17659_Unigene_29145	ceramide kinase isoform X1	470.301	22.5834	0.048019	-4.38025	0.0106676	Yes	0.2752	No	Down
XP_012843336	CDS_32170_Unigene_50177	CDS_25459_Unigene_39886	pyridoxal chloroplastic isoform X1	556.958	27.3378	0.0490841	-4.3486	0.0106773	Yes	0.2752	No	Down
XP_011097546	CDS_36610_Unigene_56342	CDS_33536_Unigene_51075	PREDICTED: LOW QUALITY PROTEIN: uncharacterized protein LOC105176443	2668.69	268.624	0.100658	-3.31247	0.0107218	Yes	0.27525	No	Down
XP_011097595	CDS_7390_Unigene_14722	CDS_14555_Unigene_24663	major pollen allergen Lol p 11-like	5827.02	758.327	0.13014	-2.94187	0.0107337	Yes	0.27525	No	Down
XP_011072605	CDS_29600_Unigene_46407	CDS_8337_Unigene_15465	WAT1-related At2g39510-like isoform X2	166.583	1946.93	11.6875	3.54689	0.0106997	Yes	0.27525	No	Up
XP_011094929	CDS_8829_Unigene_17181	CDS_8450_Unigene_15651	PREDICTED: uncharacterized protein LOC105174502	19.3505	393.427	20.3316	4.34565	0.0107858	Yes	0.276121	No	Up
XP_011071350	CDS_11393_Unigene_21058	CDS_32862_Unigene_50140	probable beta-1,3-galactosyltransferase 16	95.9112	1357.38	14.1525	3.82298	0.0108829	Yes	0.277349	No	Up
XP_011089853	CDS_35109_Unigene_54351	CDS_31932_Unigene_48851	PREDICTED: uncharacterized protein LOC105170680 isoform X1	170.789	1969.51	11.5318	3.52755	0.0108886	Yes	0.277349	No	Up
XP_011097420	CDS_26955_Unigene_42706	CDS_2561_Unigene_5345	1-phosphatidylinositol-3-phosphate 5-kinase FAB1D	376.914	3341.15	8.8645	3.14804	0.0108846	Yes	0.277349	No	Up
XP_011077152	CDS_11781_Unigene_21620	CDS_5727_Unigene_11198	transcription factor HBP-1b(c38)-like	1325.93	92.7108	0.0699213	-3.83812	0.0110237	Yes	0.278455	No	Down
XP_012849111	CDS_34302_Unigene_53225	CDS_28315_Unigene_43840	uncharacterized membrane At1g16860	1036.51	64.1844	0.0619233	-4.01337	0.0110144	Yes	0.278455	No	Down
XP_011075635	CDS_3206_Unigene_7138	CDS_10327_Unigene_18444	vacuolar amino acid transporter 1-like	15.1439	288.83	19.0724	4.25341	0.0110183	Yes	0.278455	No	Up
XP_011081121	CDS_22609_Unigene_36761	CDS_26180_Unigene_40881	LRR receptor-like serine threonine- kinase GSO2	69.8301	1094.7	15.6766	3.97054	0.0109909	Yes	0.278455	No	Up
XP_011092084	CDS_6513_Unigene_13105	CDS_2441_Unigene_5146	PREDICTED: uncharacterized protein LOC105172385	26.0811	519.418	19.9155	4.31582	0.0110132	Yes	0.278455	No	Up
XP_011076446	CDS_39435_Unigene_61630	CDS_35778_Unigene_56020	peptide methionine sulfoxide reductase A1-like	3134.78	345.883	0.110337	-3.18001	0.0110849	Yes	0.279016	No	Down
XP_011071268	CDS_14013_Unigene_24755	CDS_11551_Unigene_20254	pentatricopeptide repeat-containing At1g13630	13.4612	237.72	17.6596	4.14238	0.0111011	Yes	0.279016	No	Up
XP_011075964	CDS_27709_Unigene_43820	CDS_22830_Unigene_36257	PREDICTED: protein ABIL2-like	59.7342	979.406	16.3961	4.03528	0.0110977	Yes	0.279016	No	Up
XP_011095058	CDS_3224_Unigene_7171	CDS_9768_Unigene_17653	ESKIMO 1-like	2501.26	247.229	0.0988416	-3.33874	0.0111465	Yes	0.279695	No	Down
XP_011084438	CDS_29527_Unigene_46300	CDS_33272_Unigene_50679	mitogen-activated kinase kinase kinase YODA-like	135.454	1681.87	12.4166	3.6342	0.0112122	Yes	0.280878	No	Up
XP_012851238	CDS_4054_Unigene_8853	CDS_12487_Unigene_21695	ABC transporter C family member 3-like	434.966	21.3948	0.0491873	-4.34557	0.0112554	Yes	0.281496	No	Down
XP_011091612	CDS_2267_Unigene_5128	CDS_11103_Unigene_19573	chromosome-associated kinesin KIF4-like	2146.22	197.308	0.0919325	-3.44328	0.0112831	Yes	0.281724	No	Down
XP_011088488	CDS_13539_Unigene_24069	CDS_22572_Unigene_35901	B-box zinc finger 19	198.553	11.886	0.0598631	-4.06219	0.0113055	Yes	0.281821	No	Down
XP_011076067	CDS_4145_Unigene_9051	CDS_7783_Unigene_14567	PREDICTED: uncharacterized protein LOC105160403	137.977	1697.32	12.3014	3.62075	0.0113244	Yes	0.281828	No	Up
XP_011074567	CDS_30512_Unigene_47712	CDS_27021_Unigene_42039	26S proteasome non-ATPase regulatory subunit 8 homolog A	2738.52	286.453	0.104601	-3.25703	0.0114614	Yes	0.283545	No	Down
XP_011085831	CDS_14881_Unigene_26012	CDS_24136_Unigene_38020	PREDICTED: uncharacterized protein LOC105167710	3441.87	400.558	0.116378	-3.10311	0.0114526	Yes	0.283545	No	Down
XP_011090480	CDS_30353_Unigene_47515	CDS_332_Unigene_691	phragmoplast orienting kinesin 2	430.759	21.3948	0.0496677	-4.33155	0.0114681	Yes	0.283545	No	Down
XP_011095117	CDS_7271_Unigene_14496	CDS_3764_Unigene_7565	U-box domain-containing 16	652.869	34.4694	0.0527968	-4.24341	0.0114406	Yes	0.283545	No	Down
XP_011092424	CDS_35228_Unigene_54525	CDS_30335_Unigene_46668	calmodulin-binding transcription activator 2	2024.23	181.856	0.0898394	-3.47651	0.0114921	Yes	0.283678	No	Down
XP_011078243	CDS_18250_Unigene_30720	CDS_12795_Unigene_22139	receptor kinase HSL1	40.3837	728.612	18.0422	4.17331	0.0115259	Yes	0.283882	No	Up
XP_012833208	CDS_39958_Unigene_62841	CDS_207_Unigene_472	indole-3-acetic acid-amido synthetase	10.0959	125.992	12.4795	3.64148	0.0115378	Yes	0.283882	No	Up
XP_011073857	CDS_24361_Unigene_39134	CDS_4453_Unigene_8672	BTB POZ domain-containing At3g49900	13.4612	229.4	17.0415	4.09098	0.0115579	Yes	0.283918	No	Up
XP_011090993	CDS_15072_Unigene_26228	CDS_2_Unigene_4	Fanconi anemia group I homolog	297.829	15.4518	0.0518814	-4.26864	0.0116086	Yes	0.284701	No	Down
XP_011071033	CDS_11487_Unigene_21182	CDS_8106_Unigene_15105	NRT1 PTR FAMILY -like	593.976	30.9036	0.0520283	-4.26456	0.0116402	Yes	0.285016	No	Down
XP_012831833	CDS_34436_Unigene_53408	CDS_31157_Unigene_47837	PREDICTED: uncharacterized protein LOC105952765	990.241	61.8072	0.0624163	-4.00193	0.0116825	Yes	0.28559	No	Down
XP_011071688	CDS_17847_Unigene_30190	CDS_2139_Unigene_4582	NAC domain-containing 100-like	21.0332	408.878	19.4397	4.28093	0.0117843	Yes	0.287615	No	Up
XP_011096065	CDS_40140_Unigene_63429	CDS_3822_Unigene_7683	tRNA wybutosine-synthesizing 2 3 4	84.1326	1212.37	14.4102	3.84902	0.0118768	Yes	0.289409	No	Up
XP_011084506	CDS_26883_Unigene_42617	CDS_2485_Unigene_5221	PREDICTED: uncharacterized protein LOC105166742 isoform X3	487.969	24.9606	0.051152	-4.28907	0.0119326	Yes	0.289906	No	Down
XP_011099660	CDS_1743_Unigene_4098	CDS_2907_Unigene_5928	alcohol dehydrogenase 1B	1723.04	12443.5	7.22182	2.85236	0.0119354	Yes	0.289906	No	Up
XP_011074308	CDS_30707_Unigene_48016	CDS_20538_Unigene_33075	probable inactive poly [ADP-ribose] polymerase SRO3	55.5275	906.902	16.3325	4.02967	0.0119582	Yes	0.289996	No	Up
XP_011093604	CDS_30739_Unigene_48061	CDS_3132_Unigene_6287	PREDICTED: uncharacterized protein LOC105173510 isoform X2	1258.62	89.145	0.0708273	-3.81955	0.0120293	Yes	0.29079	No	Down
XP_011072097	CDS_21761_Unigene_35609	CDS_23440_Unigene_37096	PREDICTED: uncharacterized protein LOC105157385	68.9887	1054.29	15.282	3.93376	0.0120156	Yes	0.29079	No	Up
XP_012832073	CDS_32080_Unigene_50007	CDS_3637_Unigene_7343	phosphatidylinositol:ceramide inositolphosphotransferase 2-like	2471.82	250.795	0.101462	-3.30099	0.0121066	Yes	0.291731	No	Down
XP_012856540	CDS_15177_Unigene_26372	CDS_8283_Unigene_15385	PREDICTED: pectinesterase-like	6514.39	891.45	0.136843	-2.8694	0.0121007	Yes	0.291731	No	Down
XP_015083664	CDS_6213_Unigene_12621	CDS_4929_Unigene_9563	nicotinamidase 1-like	935.555	6803.54	7.2722	2.86239	0.0121841	Yes	0.293133	No	Up
XP_011082883	CDS_27264_Unigene_43181	CDS_1648_Unigene_3667	PREDICTED: uncharacterized protein LOC105165535	415.615	21.3948	0.0514774	-4.27992	0.0122741	Yes	0.294831	No	Down
XP_011076151	CDS_16301_Unigene_28086	CDS_21357_Unigene_34259	PREDICTED: uncharacterized protein LOC105160466	597.342	32.0922	0.053725	-4.21826	0.0123437	Yes	0.295104	No	Down
XP_011072267	CDS_6783_Unigene_13626	CDS_12229_Unigene_21277	pleiotropic drug resistance 1-like	15.1439	265.058	17.5026	4.1295	0.0123438	Yes	0.295104	No	Up
XP_011092401	CDS_38286_Unigene_58608	CDS_8946_Unigene_16468	PREDICTED: uncharacterized protein LOC105172591 isoform X1	147.232	1729.41	11.7462	3.55412	0.0123165	Yes	0.295104	No	Up
XP_011100361	CDS_14457_Unigene_25434	CDS_30026_Unigene_46234	O-acyltransferase WSD1-like	167.424	1872.04	11.1815	3.48304	0.0125168	Yes	0.298771	No	Up
XP_011072579	CDS_30660_Unigene_47957	CDS_28018_Unigene_43417	transcription initiation factor TFIID subunit 12b	2507.15	260.303	0.103824	-3.26778	0.012611	Yes	0.300003	No	Down
XP_011086533	CDS_5865_Unigene_12075	CDS_9002_Unigene_16551	PREDICTED: uncharacterized protein LOC105168235 isoform X2	1871.11	167.593	0.0895686	-3.48086	0.0126156	Yes	0.300003	No	Down
XP_011088178	CDS_4207_Unigene_9193	CDS_8059_Unigene_15024	PREDICTED: uncharacterized protein LOC105169483	554.434	29.715	0.0535952	-4.22175	0.0126278	Yes	0.300003	No	Down
XP_011093723	CDS_24760_Unigene_39706	CDS_21131_Unigene_33937	potassium channel AKT1-like	62.2581	962.766	15.4641	3.95085	0.0127134	Yes	0.301567	No	Up
XP_009758369	CDS_2349_Unigene_5337	CDS_1411_Unigene_3257	PREDICTED: uncharacterized protein LOC104211068	307.084	16.6404	0.0541884	-4.20587	0.012769	Yes	0.301941	No	Down
XP_011075114	CDS_28263_Unigene_44585	CDS_26224_Unigene_40955	PREDICTED: uncharacterized protein LOC105159671 isoform X1	1047.45	7463.22	7.12512	2.83291	0.0127574	Yes	0.301941	No	Up
XP_011071499	CDS_35913_Unigene_55416	CDS_8975_Unigene_16513	PREDICTED: uncharacterized protein LOC105156929	2260.64	224.645	0.0993723	-3.33101	0.0128398	Yes	0.303143	No	Down
XP_011086216	CDS_20448_Unigene_33704	CDS_2215_Unigene_4732	E3 ubiquitin- ligase COP1-like	393.741	3300.74	8.38304	3.06747	0.0128958	Yes	0.303521	No	Up
XP_011100260	CDS_20_Unigene_62	CDS_1408_Unigene_3246	PREDICTED: uncharacterized protein LOC105178478	127.882	1558.25	12.1851	3.60705	0.0128844	Yes	0.303521	No	Up
XP_011070126	CDS_3962_Unigene_8628	CDS_209_Unigene_474	peroxisome biogenesis 19-2-like	281.003	2618.49	9.31836	3.22008	0.0129791	Yes	0.305009	No	Up
XP_011074258	CDS_16201_Unigene_27944	CDS_5980_Unigene_11669	F-box kelch-repeat SKIP25-like	43.749	738.12	16.8717	4.07654	0.013048	Yes	0.306154	No	Up
XP_011087488	CDS_12204_Unigene_22210	CDS_9902_Unigene_17829	nicotianamine synthase-like	39.5423	682.256	17.2538	4.10884	0.0130863	Yes	0.306394	No	Up
XP_011099355	CDS_2180_Unigene_4923	CDS_384_Unigene_816	LOB domain-containing 37-like	67.3061	1006.74	14.9577	3.90282	0.0130986	Yes	0.306394	No	Up
XP_011075994	CDS_16657_Unigene_28551	CDS_2327_Unigene_4934	BOBBER 1	116.103	1454.85	12.5306	3.64739	0.0131385	Yes	0.306854	No	Up
XP_011083838	CDS_1539_Unigene_3391	CDS_7012_Unigene_13287	PREDICTED: uncharacterized protein LOC105166244	302.036	2733.78	9.05117	3.1781	0.013254	Yes	0.309076	No	Up
XP_012834329	CDS_34872_Unigene_54054	CDS_32842_Unigene_50110	PREDICTED: uncharacterized protein LOC105955174 isoform X1	27.7638	501.589	18.0663	4.17523	0.0133637	Yes	0.311157	No	Up
XP_011090867	CDS_38061_Unigene_58291	CDS_32774_Unigene_50021	brefeldin A-inhibited guanine nucleotide-exchange 2	2401.99	250.795	0.104411	-3.25965	0.0135013	Yes	0.313879	No	Down
XP_011100763	CDS_10124_Unigene_19179	CDS_13502_Unigene_23187	PREDICTED: uncharacterized protein LOC105178888 isoform X2	2025.91	194.93	0.0962185	-3.37754	0.0135625	Yes	0.31482	No	Down
XP_011083552	CDS_18650_Unigene_31255	CDS_7168_Unigene_13588	alkaline neutral invertase CINV2-like	1716.31	152.141	0.0886444	-3.49583	0.0137192	Yes	0.317004	No	Down
XP_011100391	CDS_19974_Unigene_33091	CDS_5718_Unigene_11183	PREDICTED: myosin-9-like	924.617	60.6186	0.0655607	-3.93102	0.0137105	Yes	0.317004	No	Down
XP_011097953	CDS_4221_Unigene_9219	CDS_29707_Unigene_45766	G-type lectin S-receptor-like serine threonine- kinase At4g27290	11.7786	149.764	12.7149	3.66845	0.0137062	Yes	0.317004	No	Up
XP_011087975	CDS_26121_Unigene_41532	CDS_754_Unigene_1726	polyamine oxidase 1	262.494	15.4518	0.0588654	-4.08644	0.0137632	Yes	0.317537	No	Down
XP_011098070	CDS_5826_Unigene_12010	CDS_12243_Unigene_21300	PREDICTED: uncharacterized protein LOC105176840 isoform X2	26.9224	480.194	17.8362	4.15674	0.013786	Yes	0.317581	No	Up
XP_011077762	CDS_30793_Unigene_48133	CDS_15356_Unigene_25863	PREDICTED: uncharacterized protein LOC105161684	1137.47	82.0134	0.0721014	-3.79383	0.0138692	Yes	0.318358	No	Down
XP_011096759	CDS_32548_Unigene_50702	CDS_1883_Unigene_4023	ROOT HAIR DEFECTIVE 3 homolog 2 isoform X1	908.632	59.43	0.065406	-3.93443	0.0138437	Yes	0.318358	No	Down
XP_012853486	CDS_4341_Unigene_9390	CDS_13887_Unigene_23699	UPF0202 At1g10490-like	1855.97	172.347	0.0928611	-3.42878	0.0138827	Yes	0.318358	No	Down
XP_011094893	CDS_12584_Unigene_22759	CDS_5273_Unigene_10191	PREDICTED: uncharacterized protein LOC105174471	253.239	2397.41	9.46696	3.2429	0.0139159	Yes	0.318638	No	Up
XP_011088306	CDS_16424_Unigene_28249	CDS_8584_Unigene_15891	phragmoplast orienting kinesin 2	1529.53	128.369	0.0839269	-3.57472	0.0139382	Yes	0.318669	No	Down
XP_011077283	CDS_174_Unigene_418	CDS_1509_Unigene_3442	PREDICTED: uncharacterized protein LOC105161334, partial	798.418	49.9212	0.0625251	-3.99942	0.0139849	Yes	0.319255	No	Down
XP_011099144	CDS_10482_Unigene_19736	CDS_1945_Unigene_4127	beta-amyrin 28-oxidase-like	384.486	21.3948	0.0556452	-4.1676	0.0141516	Yes	0.322576	No	Down
XP_011083176	CDS_25264_Unigene_40373	CDS_15818_Unigene_26555	PREDICTED: uncharacterized protein LOC105165753	2096.58	209.194	0.0997783	-3.32513	0.014207	Yes	0.322942	No	Down
XP_011085435	CDS_16131_Unigene_27824	CDS_23291_Unigene_36886	reticulon B8	2734.31	310.225	0.113456	-3.13979	0.0142102	Yes	0.322942	No	Down
XP_011087464	CDS_23020_Unigene_37304	CDS_25227_Unigene_39562	PREDICTED: uncharacterized protein LOC105168944 isoform X3	2038.53	200.873	0.0985382	-3.34317	0.0142586	Yes	0.323557	No	Down
XP_011090721	CDS_18101_Unigene_30530	CDS_2838_Unigene_5812	PREDICTED: uncharacterized protein LOC105171345	16.8265	276.944	16.4588	4.04078	0.0143517	Yes	0.325184	No	Up
XP_011088780	CDS_29375_Unigene_46112	CDS_22814_Unigene_36243	serine threonine- kinase ATR	13.4612	187.799	13.9511	3.80231	0.0144056	Yes	0.325918	No	Up
XP_012836174	CDS_17727_Unigene_30045	CDS_24647_Unigene_38729	myosin-binding 7-like	90.8632	1198.11	13.1858	3.72092	0.0145401	Yes	0.328473	No	Up
XP_011093647	CDS_9682_Unigene_18485	CDS_11504_Unigene_20183	probable glutamate carboxypeptidase 2 isoform X2	772.337	5418.83	7.01614	2.81068	0.0146751	Yes	0.33103	No	Up
XP_012848201	CDS_39288_Unigene_60980	CDS_4947_Unigene_9586	probable polyamine oxidase 5	863.201	57.0528	0.0660945	-3.91933	0.0147269	Yes	0.331704	No	Down
XP_011088506	CDS_3794_Unigene_8263	CDS_6683_Unigene_12684	PREDICTED: uncharacterized protein LOC105169716 isoform X1	22.7158	391.049	17.2149	4.10558	0.0148087	Yes	0.333052	No	Up
XP_011075282	CDS_1835_Unigene_4320	CDS_9164_Unigene_16768	ENHANCER OF AG-4 2-like isoform X2	348.309	20.2062	0.0580123	-4.1075	0.0150778	Yes	0.338605	No	Down
XP_011090172	CDS_36824_Unigene_56590	CDS_32304_Unigene_49374	rho GTPase-activating 7-like	1710.42	158.084	0.0924242	-3.43559	0.0151705	Yes	0.33862	No	Down
XP_011095011	CDS_16029_Unigene_27634	CDS_14791_Unigene_25012	PREDICTED: uncharacterized protein LOC105174567 isoform X1	322.228	19.0176	0.0590191	-4.08267	0.015257	Yes	0.33862	No	Down
XP_011096384	CDS_11806_Unigene_21666	CDS_860_Unigene_1994	GDSL esterase lipase At5g45960	853.946	57.0528	0.0668108	-3.90378	0.0151708	Yes	0.33862	No	Down
XP_011097686	CDS_14271_Unigene_25137	CDS_3086_Unigene_6207	PREDICTED: uncharacterized protein LOC105176546	471.143	27.3378	0.0580245	-4.1072	0.0151951	Yes	0.33862	No	Down
XP_011069529	CDS_18735_Unigene_31370	CDS_14159_Unigene_24109	F-box 7	159.852	1722.28	10.7742	3.42951	0.0151305	Yes	0.33862	No	Up
XP_011073720	CDS_12350_Unigene_22422	CDS_13554_Unigene_23246	G3BP isoform X1	200.236	1995.66	9.96655	3.31709	0.015238	Yes	0.33862	No	Up
XP_011090738	CDS_2468_Unigene_5729	CDS_1669_Unigene_3693	sugar transport 13	368.501	3020.23	8.196	3.03492	0.0152334	Yes	0.33862	No	Up
XP_011099123	CDS_12486_Unigene_22638	CDS_13924_Unigene_23751	DNA polymerase alpha catalytic subunit	152.28	1666.42	10.9431	3.45195	0.0151846	Yes	0.33862	No	Up
XP_011081059	CDS_4755_Unigene_10157	CDS_9944_Unigene_17906	PREDICTED: uncharacterized protein LOC105164164	148.915	11.886	0.0798175	-3.64715	0.0153475	Yes	0.340131	No	Down
XP_011072873	CDS_27156_Unigene_43001	CDS_7836_Unigene_14653	PREDICTED: uncharacterized protein LOC105157989	948.175	66.5616	0.0701997	-3.83239	0.0154176	Yes	0.340262	No	Down
XP_011095165	CDS_7822_Unigene_15492	CDS_8806_Unigene_16238	probable inactive receptor kinase At5g58300	208.649	14.2632	0.0683598	-3.87071	0.0154511	Yes	0.340262	No	Down
XP_011099195	CDS_24621_Unigene_39514	CDS_10789_Unigene_19089	probable LRR receptor-like serine threonine- kinase At3g47570	1733.97	162.838	0.0939104	-3.41257	0.0154821	Yes	0.340262	No	Down
XP_011071622	CDS_16607_Unigene_28473	CDS_12608_Unigene_21875	ABC transporter A family member 7-like isoform X2	164.9	1747.24	10.5958	3.40542	0.0154587	Yes	0.340262	No	Up
XP_011073515	CDS_40463_Unigene_64093	CDS_19974_Unigene_32308	1-aminocyclopropane-1-carboxylate oxidase homolog 1-like	41.225	658.484	15.9729	3.99756	0.0154878	Yes	0.340262	No	Up
XP_011099060	CDS_17965_Unigene_30348	CDS_17795_Unigene_29285	heat shock factor HSF30	113.579	1365.7	12.0242	3.58787	0.0154637	Yes	0.340262	No	Up
XP_011071701	CDS_15126_Unigene_26304	CDS_908_Unigene_2087	uncharacterized acetyltransferase At3g50280-like	386.169	22.5834	0.0584806	-4.0959	0.0155305	Yes	0.340439	No	Down
XP_011074692	CDS_40171_Unigene_63639	CDS_7557_Unigene_14209	PREDICTED: uncharacterized protein LOC105159352	1698.64	158.084	0.093065	-3.42562	0.0155415	Yes	0.340439	No	Down
XP_011081587	CDS_32235_Unigene_50254	CDS_31424_Unigene_48205	guanine nucleotide-binding alpha-1 subunit	1443.72	123.614	0.0856224	-3.54587	0.0155879	Yes	0.340439	No	Down
XP_011083139	CDS_28716_Unigene_45192	CDS_26652_Unigene_41552	callose synthase 3	153.121	1659.29	10.8364	3.43781	0.0156081	Yes	0.340439	No	Up
XP_011098978	CDS_17184_Unigene_29308	CDS_10289_Unigene_18389	PREDICTED: uncharacterized protein LOC105177492	902.743	6123.67	6.7834	2.76201	0.0155679	Yes	0.340439	No	Up
XP_011092655	CDS_37632_Unigene_57736	CDS_31666_Unigene_48541	ATP-dependent helicase BRM isoform X1	600.707	36.8466	0.0613387	-4.02706	0.0158395	Yes	0.343432	No	Down
XP_011074531	CDS_37669_Unigene_57771	CDS_33063_Unigene_50378	PREDICTED: uncharacterized protein LOC105159236 isoform X2	31.9704	526.55	16.4699	4.04176	0.0157982	Yes	0.343432	No	Up
XP_011080978	CDS_21164_Unigene_34750	CDS_34533_Unigene_52945	auxin-induced 22C-like	312.973	2674.35	8.54498	3.09508	0.0158142	Yes	0.343432	No	Up
XP_011091420	CDS_23182_Unigene_37501	CDS_22160_Unigene_35309	PREDICTED: uncharacterized protein LOC105171868	395.423	3139.09	7.93856	2.98888	0.0158584	Yes	0.343432	No	Up
XP_011099873	CDS_1514_Unigene_3306	CDS_17468_Unigene_28893	PREDICTED: LOW QUALITY PROTEIN: uncharacterized protein LOC105178172	26.9224	448.102	16.6442	4.05695	0.0158288	Yes	0.343432	No	Up
XP_011076873	CDS_26892_Unigene_42628	CDS_12690_Unigene_21983	PREDICTED: uncharacterized protein LOC105161020 isoform X1	31.9704	524.172	16.3956	4.03523	0.01595	Yes	0.344925	No	Up
XP_011072453	CDS_39029_Unigene_60578	CDS_10850_Unigene_19194	GDSL esterase lipase APG	11334.3	1724.66	0.152162	-2.71632	0.0161436	Yes	0.345178	No	Down
XP_011075092	CDS_31979_Unigene_49842	CDS_28043_Unigene_43448	carbon catabolite repressor 4 homolog 1-like	3763.25	511.098	0.135813	-2.88031	0.0160869	Yes	0.345178	No	Down
XP_011075489	CDS_3842_Unigene_8376	CDS_2105_Unigene_4525	HVA22 a	259.128	16.6404	0.0642168	-3.96091	0.0161404	Yes	0.345178	No	Down
XP_011089626	CDS_14422_Unigene_25372	CDS_14419_Unigene_24449	4-hydroxy-tetrahydrodipicolinate chloroplastic-like	2141.17	227.023	0.106027	-3.2375	0.0160685	Yes	0.345178	No	Down
XP_011096883	CDS_38455_Unigene_58862	CDS_9052_Unigene_16621	tetrahydrocannabinolic acid synthase-like	598.183	36.8466	0.0615975	-4.02098	0.0159932	Yes	0.345178	No	Down
XP_011098433	CDS_3411_Unigene_7502	CDS_1324_Unigene_2958	PREDICTED: protein RST1	1049.97	78.4476	0.0747138	-3.74248	0.0160579	Yes	0.345178	No	Down
XP_012858001	CDS_12110_Unigene_22099	CDS_24526_Unigene_38550	L-ascorbate peroxidase 6	1187.95	93.8994	0.079043	-3.66122	0.0161397	Yes	0.345178	No	Down
XP_012834628	CDS_21059_Unigene_34569	CDS_35075_Unigene_54179	PREDICTED: uncharacterized protein LOC105955450	219.586	2090.75	9.52131	3.25116	0.0161078	Yes	0.345178	No	Up
XP_011085149	CDS_11956_Unigene_21902	CDS_16092_Unigene_26925	urease accessory D isoform X2	140.501	11.886	0.084597	-3.56325	0.016369	Yes	0.349013	No	Down
XP_011088790	CDS_18597_Unigene_31199	CDS_20262_Unigene_32683	vacuolar sorting-associated 24 homolog 1-like	1954.4	199.685	0.102172	-3.29093	0.0163552	Yes	0.349013	No	Down
XP_011086901	CDS_29477_Unigene_46232	CDS_24610_Unigene_38692	PREDICTED: uncharacterized protein LOC105168496	2126.87	228.211	0.107299	-3.22029	0.0166696	Yes	0.354427	No	Down
XP_011072001	CDS_18846_Unigene_31527	CDS_10604_Unigene_18838	28 kDa chloroplastic-like	599.024	4215.96	7.03805	2.81518	0.0166528	Yes	0.354427	No	Up
XP_011078360	CDS_28298_Unigene_44632	CDS_20785_Unigene_33431	leucine-rich repeat extensin 4	732.795	48.7326	0.0665023	-3.91045	0.0167009	Yes	0.354596	No	Down
XP_011098021	CDS_12648_Unigene_22863	CDS_4670_Unigene_9046	PREDICTED: extensin	1272.93	105.785	0.0831041	-3.58894	0.0167492	Yes	0.354629	No	Down
XP_011073420	CDS_8645_Unigene_16871	CDS_3223_Unigene_6457	topless-related 4	44.5903	678.69	15.2206	3.92795	0.0167477	Yes	0.354629	No	Up
XP_011073453	CDS_15938_Unigene_27513	CDS_5939_Unigene_11611	GRIP and coiled-coil domain-containing 2-like	849.739	5667.24	6.66939	2.73755	0.0168201	Yes	0.355636	No	Up
XP_012828204	CDS_32469_Unigene_50598	CDS_27493_Unigene_42670	hydroxymethylglutaryl- mitochondrial-like	29.4464	473.063	16.0652	4.00587	0.0168519	Yes	0.355812	No	Up
XP_011092631	CDS_17605_Unigene_29836	CDS_11981_Unigene_20934	replication A 70 kDa DNA-binding subunit A	136.295	11.886	0.087208	-3.5194	0.0169397	Yes	0.357169	No	Down
XP_011069926	CDS_12579_Unigene_22749	CDS_20922_Unigene_33634	ROOT PRIMORDIUM DEFECTIVE 1	654.552	42.7896	0.0653724	-3.93518	0.0172029	Yes	0.358368	No	Down
XP_011081592	CDS_37865_Unigene_58027	CDS_5423_Unigene_10523	myosin-15 isoform X1	1480.73	134.312	0.0907062	-3.46265	0.0172026	Yes	0.358368	No	Down
XP_011093493	CDS_37228_Unigene_57171	CDS_29741_Unigene_45827	eukaryotic translation initiation factor 4G-like	1976.28	206.816	0.10465	-3.25636	0.0170893	Yes	0.358368	No	Down
XP_011095498	CDS_3727_Unigene_8072	CDS_4903_Unigene_9524	TORNADO 1	443.379	27.3378	0.0616579	-4.01957	0.0171311	Yes	0.358368	No	Down
XP_011099116	CDS_36285_Unigene_55881	CDS_31196_Unigene_47875	histone-lysine N-methyltransferase CLF isoform X1	641.932	41.601	0.0648059	-3.94773	0.0170797	Yes	0.358368	No	Down
XP_011074721	CDS_11645_Unigene_21385	CDS_7551_Unigene_14197	phospholipase D delta-like	33.653	530.115	15.7524	3.9775	0.017174	Yes	0.358368	No	Up
XP_011082970	CDS_721_Unigene_1749	CDS_678_Unigene_1549	F-box At3g07870-like	10.0959	91.5222	9.06527	3.18035	0.0171917	Yes	0.358368	No	Up
XP_011086542	CDS_32387_Unigene_50467	CDS_27527_Unigene_42724	potassium transporter 6-like isoform X2	18.5092	278.132	15.0267	3.90946	0.017209	Yes	0.358368	No	Up
XP_011092750	CDS_13641_Unigene_24212	CDS_21438_Unigene_34369	transmembrane 45B	6.73061	48.7326	7.24044	2.85608	0.0170319	Yes	0.358368	No	Up
XP_011096215	CDS_28460_Unigene_44877	CDS_30252_Unigene_46549	B3 domain-containing Os07g0563300	1379.77	121.237	0.0878674	-3.50853	0.0173435	Yes	0.360673	No	Down
XP_011096149	CDS_25773_Unigene_41035	CDS_222_Unigene_497	PREDICTED: patellin-3	1412.59	125.992	0.0891921	-3.48694	0.0174659	Yes	0.362723	No	Down
XP_011100484	CDS_28169_Unigene_44452	CDS_35384_Unigene_55027	endonuclease III homolog chloroplastic-like	917.887	67.7502	0.073811	-3.76002	0.0175051	Yes	0.36304	No	Down
XP_011070302	CDS_16549_Unigene_28396	CDS_5558_Unigene_10814	alpha,alpha-trehalose-phosphate synthase [UDP-forming] 5 isoform X1	1417.63	127.18	0.0897129	-3.47854	0.0176204	Yes	0.364434	No	Down
XP_011072063	CDS_813_Unigene_1992	CDS_4759_Unigene_9245	pentatricopeptide repeat-containing At2g13600-like	15.1439	196.119	12.9504	3.69492	0.0176175	Yes	0.364434	No	Up
XP_012832185	CDS_30656_Unigene_47944	CDS_15733_Unigene_26427	PREDICTED: uncharacterized protein LOC105953101 isoform X2	66.4648	898.581	13.5197	3.75699	0.0176597	Yes	0.364751	No	Up
XP_011072576	CDS_10422_Unigene_19639	CDS_1395_Unigene_3205	ELF4-LIKE 4	2545.85	304.282	0.11952	-3.06467	0.0177111	Yes	0.365315	No	Down
XP_011072922	CDS_39511_Unigene_61729	CDS_6910_Unigene_13125	lysine-specific demethylase REF6 isoform X1	2497.06	295.961	0.118524	-3.07675	0.017739	Yes	0.365394	No	Down
XP_011095677	CDS_11788_Unigene_21628	CDS_7455_Unigene_14061	WD repeat-containing 75	323.911	2650.58	8.18305	3.03264	0.0178579	Yes	0.367345	No	Up
XP_011092107	CDS_37727_Unigene_57850	CDS_33140_Unigene_50494	topless-related 3-like	303.719	2535.28	8.34747	3.06134	0.0178845	Yes	0.367395	No	Up
XP_011094839	CDS_21329_Unigene_34982	CDS_25726_Unigene_40262	probable ADP-ribosylation factor GTPase-activating AGD6	3194.52	424.33	0.132831	-2.91234	0.0179252	Yes	0.367732	No	Down
XP_011088324	CDS_17607_Unigene_29840	CDS_8330_Unigene_15453	cold-regulated 413 plasma membrane 2-like	355.04	2815.79	7.93093	2.98749	0.0180349	Yes	0.369485	No	Up
XP_011077572	CDS_24083_Unigene_38747	CDS_28023_Unigene_43422	auxin transporter 2	441.696	3279.35	7.42444	2.89228	0.01809	Yes	0.370114	No	Up
XP_011088794	CDS_36492_Unigene_56154	CDS_32865_Unigene_50143	UPSTREAM OF FLC	208.649	15.4518	0.0740565	-3.75523	0.0181444	Yes	0.370229	No	Down
XP_012851973	CDS_597_Unigene_1328	CDS_4690_Unigene_9080	molybdenum cofactor sulfurase	761.4	53.487	0.0702482	-3.83139	0.0181339	Yes	0.370229	No	Down
XP_011080736	CDS_15283_Unigene_26550	CDS_7451_Unigene_14055	CBL-interacting kinase 18	834.596	60.6186	0.0726323	-3.78325	0.0181985	Yes	0.370834	No	Down
XP_011086670	CDS_20904_Unigene_34326	CDS_18513_Unigene_30305	PREDICTED: uncharacterized protein LOC105168326	31.1291	479.006	15.3877	3.94371	0.0182605	Yes	0.371598	No	Up
XP_011097537	CDS_31472_Unigene_49091	CDS_31448_Unigene_48232	14-3-3 16R	1871.11	11807.5	6.31045	2.65774	0.018331	Yes	0.372534	No	Up
XP_011069659	CDS_40328_Unigene_63851	CDS_7155_Unigene_13561	subtilisin-like protease	843.009	61.8072	0.0733174	-3.7697	0.0184064	Yes	0.372654	No	Down
XP_012840696	CDS_18211_Unigene_30677	CDS_8693_Unigene_16058	PREDICTED: uncharacterized protein LOC105961012	104.324	10.6974	0.10254	-3.28575	0.0184105	Yes	0.372654	No	Down
XP_012847791	CDS_7806_Unigene_15460	CDS_5578_Unigene_10859	dynamin-related 5A	592.294	39.2238	0.0662236	-3.91651	0.0184095	Yes	0.372654	No	Down
XP_011078934	CDS_21272_Unigene_34903	CDS_17616_Unigene_29085	EARLY RESPONSIVE TO DEHYDRATION 15	2009.93	12636	6.28679	2.65232	0.0184407	Yes	0.372768	No	Up
XP_011086131	CDS_11978_Unigene_21926	CDS_9924_Unigene_17873	sugar carrier C	1368.84	8623.29	6.29972	2.65529	0.01851	Yes	0.373671	No	Up
XP_011070719	CDS_14421_Unigene_25371	CDS_20673_Unigene_33272	PREDICTED: uncharacterized protein LOC105156320	2323.74	272.189	0.117134	-3.09377	0.0187052	Yes	0.374128	No	Down
XP_011075507	CDS_1969_Unigene_4533	CDS_3921_Unigene_7858	mitochondrial Rho GTPase 1	2239.61	257.926	0.115166	-3.11822	0.0186906	Yes	0.374128	No	Down
XP_011082374	CDS_15210_Unigene_26426	CDS_1620_Unigene_3624	premnaspirodiene oxygenase-like	647.821	43.9782	0.0678863	-3.88074	0.0185771	Yes	0.374128	No	Down
XP_011090429	CDS_31622_Unigene_49310	CDS_27833_Unigene_43135	zinc finger CCCH domain-containing 44-like isoform X4	2423.86	288.83	0.119161	-3.06902	0.0186073	Yes	0.374128	No	Down
XP_011096160	CDS_21979_Unigene_35953	CDS_15595_Unigene_26216	cysteine-rich receptor kinase 25	1143.36	95.088	0.0831652	-3.58788	0.0186059	Yes	0.374128	No	Down
XP_011072092	CDS_2340_Unigene_5308	CDS_5266_Unigene_10179	abietadienol abietadienal oxidase	11.7786	114.106	9.68756	3.27613	0.0186658	Yes	0.374128	No	Up
XP_011102094	CDS_16057_Unigene_27678	CDS_18918_Unigene_30868	selenium-binding 2- partial	37.8597	565.773	14.944	3.90149	0.0186787	Yes	0.374128	No	Up
XP_012852457	CDS_22493_Unigene_36633	CDS_15798_Unigene_26527	eukaryotic translation initiation factor 6-2	527.511	3700.11	7.01428	2.81029	0.0187352	Yes	0.374236	No	Up
XP_002958799	CDS_13496_Unigene_23992	CDS_6289_Unigene_12114	hypothetical protein VOLCADRAFT_69961	1950.19	211.571	0.108487	-3.20441	0.0188943	Yes	0.376872	No	Down
XP_011094246	CDS_19826_Unigene_32883	CDS_4599_Unigene_8959	nuclear transcription factor Y subunit A-10	32.8117	494.457	15.0695	3.91356	0.0189168	Yes	0.376872	No	Up
XP_011092876	CDS_20256_Unigene_33426	CDS_8927_Unigene_16433	probable galacturonosyltransferase 10 isoform X1	1656.57	166.404	0.100451	-3.31544	0.0190365	Yes	0.378759	No	Down
XP_011070381	CDS_12593_Unigene_22772	CDS_19114_Unigene_31138	GTPase-activating gyp7 isoform X3	1246.85	109.351	0.0877023	-3.51124	0.0191711	Yes	0.380797	No	Down
XP_011073085	CDS_23113_Unigene_37411	CDS_11937_Unigene_20862	thylakoid lumenal kDa chloroplastic	829.548	61.8072	0.0745071	-3.74648	0.0192142	Yes	0.380797	No	Down
XP_011072393	CDS_21647_Unigene_35462	CDS_21608_Unigene_34579	PREDICTED: uncharacterized protein LOC105157660 isoform X1	107.69	1230.2	11.4236	3.51394	0.0192137	Yes	0.380797	No	Up
XP_011100689	CDS_19455_Unigene_32370	CDS_20265_Unigene_32691	MATH domain and coiled-coil domain-containing At2g42460	1017.16	82.0134	0.0806295	-3.63255	0.0192741	Yes	0.381486	No	Down
XP_011079779	CDS_7993_Unigene_15806	CDS_8063_Unigene_15028	probable LRR receptor-like serine threonine- kinase RKF3	467.777	30.9036	0.0660648	-3.91998	0.019376	Yes	0.381515	No	Down
XP_011084049	CDS_29649_Unigene_46470	CDS_24946_Unigene_39157	homeobox knotted-1-like LET12 isoform X1	1297.32	116.483	0.0897869	-3.47735	0.0193725	Yes	0.381515	No	Down
XP_011089723	CDS_26310_Unigene_41809	CDS_25755_Unigene_40299	PREDICTED: uncharacterized protein LOC105170595 isoform X1	450.951	29.715	0.0658941	-3.92371	0.0193593	Yes	0.381515	No	Down
XP_011101499	CDS_1721_Unigene_4010	CDS_1206_Unigene_2666	vacuolar iron transporter homolog 2-like	17.6678	236.531	13.3877	3.74283	0.0193731	Yes	0.381515	No	Up
XP_011075687	CDS_10370_Unigene_19562	CDS_17135_Unigene_28417	probable RNA-dependent RNA polymerase 1	7482.75	1205.24	0.161069	-2.63425	0.0195346	Yes	0.383204	No	Down
XP_011080753	CDS_27397_Unigene_43358	CDS_25571_Unigene_40037	sorting nexin 2B	2279.99	269.812	0.118339	-3.079	0.0195886	Yes	0.383204	No	Down
XP_011093566	CDS_17998_Unigene_30396	CDS_21947_Unigene_35049	F-box kelch-repeat At3g06240-like	143.867	13.0746	0.0908799	-3.45989	0.0196133	Yes	0.383204	No	Down
XP_011093578	CDS_14728_Unigene_25818	CDS_4062_Unigene_8047	pentatricopeptide repeat-containing At5g21222-like	546.862	36.8466	0.0673782	-3.89157	0.0195095	Yes	0.383204	No	Down
XP_011079298	CDS_13525_Unigene_24047	CDS_19106_Unigene_31129	PREDICTED: uncharacterized protein LOC105162844	252.398	2177.51	8.62731	3.10891	0.0195414	Yes	0.383204	No	Up
XP_011081455	CDS_27514_Unigene_43535	CDS_12286_Unigene_21382	PREDICTED: protein ABIL4-like	19.3505	269.812	13.9434	3.80151	0.0195842	Yes	0.383204	No	Up
XP_011070965	CDS_17144_Unigene_29246	CDS_934_Unigene_2123	ERAD-associated E3 ubiquitin- ligase HRD1B-like	148.915	1520.22	10.2087	3.35172	0.0197069	Yes	0.384537	No	Up
XP_011087989	CDS_25171_Unigene_40267	CDS_5516_Unigene_10706	PREDICTED: uncharacterized protein LOC105169314	1881.21	204.439	0.108675	-3.20191	0.0197556	Yes	0.384895	No	Down
XP_011092466	CDS_12419_Unigene_22524	CDS_7356_Unigene_13908	squalene monooxygenase-like	1168.6	101.031	0.0864546	-3.53191	0.0197759	Yes	0.384895	No	Down
XP_011088185	CDS_9304_Unigene_17944	CDS_9394_Unigene_17088	PREDICTED: uncharacterized protein LOC105169489	5980.99	954.446	0.15958	-2.64765	0.0199112	Yes	0.386537	No	Down
XP_011086402	CDS_8809_Unigene_17163	CDS_25390_Unigene_39793	PREDICTED: uncharacterized protein LOC105168149 isoform X1	90.8632	1079.25	11.8777	3.57019	0.0198867	Yes	0.386537	No	Up
XP_011099164	CDS_12772_Unigene_22994	CDS_4741_Unigene_9195	receptor kinase At5g39000	406.361	27.3378	0.0672747	-3.89379	0.0202016	Yes	0.391174	No	Down
XP_011074362	CDS_26492_Unigene_42066	CDS_2966_Unigene_6011	interferon-related developmental regulator 1	290.258	2377.2	8.18997	3.03386	0.0201762	Yes	0.391174	No	Up
XP_011073983	CDS_22867_Unigene_37097	CDS_20532_Unigene_33067	ion channel CASTOR-like isoform X1	865.725	67.7502	0.0782584	-3.67561	0.0205374	Yes	0.392667	No	Down
XP_011086123	CDS_23431_Unigene_37866	CDS_23270_Unigene_36858	SUN domain-containing 2-like	1968.7	222.268	0.112901	-3.14687	0.0205349	Yes	0.392667	No	Down
XP_011092191	CDS_13207_Unigene_23601	CDS_14979_Unigene_25286	PREDICTED: uncharacterized protein LOC105172455 isoform X1	931.348	74.8818	0.0804015	-3.63663	0.0205368	Yes	0.392667	No	Down
XP_011092598	CDS_32085_Unigene_50024	CDS_1177_Unigene_2577	ENHANCED DISEASE RESISTANCE 2	1352.01	127.18	0.0940674	-3.41016	0.0205208	Yes	0.392667	No	Down
XP_011094727	CDS_27769_Unigene_43893	CDS_6093_Unigene_11849	PREDICTED: uncharacterized protein LOC105174344	762.241	57.0528	0.0748487	-3.73988	0.0204901	Yes	0.392667	No	Down
XP_011070499	CDS_36967_Unigene_56797	CDS_26985_Unigene_41987	cell division cycle and apoptosis regulator 1 isoform X2	615.009	4066.2	6.61161	2.725	0.0204486	Yes	0.392667	No	Up
XP_011082907	CDS_17094_Unigene_29184	CDS_13318_Unigene_22926	PREDICTED: uncharacterized protein LOC105165551	171.631	1655.72	9.647	3.27008	0.0203684	Yes	0.392667	No	Up
XP_011083055	CDS_34485_Unigene_53487	CDS_7705_Unigene_14449	PHR1-LIKE 1-like	111.055	1231.39	11.0881	3.47094	0.0204423	Yes	0.392667	No	Up
XP_012838913	CDS_19771_Unigene_32822	CDS_23004_Unigene_36504	uncharacterized WD repeat-containing isoform X1	1869.43	11414.1	6.10568	2.61015	0.02034	Yes	0.392667	No	Up
XP_012857545	CDS_13039_Unigene_23353	CDS_18673_Unigene_30517	pseudouridine-metabolizing bifunctional	58.8928	778.533	13.2195	3.72459	0.020371	Yes	0.392667	No	Up
XP_011085087	CDS_22526_Unigene_36666	CDS_25057_Unigene_39323	MLO 1 isoform X3	40.3837	571.716	14.1571	3.82346	0.0206382	Yes	0.393998	No	Up
XP_012836137	CDS_32769_Unigene_51052	CDS_23444_Unigene_37102	HUA2 2	209.49	1886.31	9.00428	3.17061	0.0206589	Yes	0.393998	No	Up
XP_011073322	CDS_11819_Unigene_21688	CDS_5696_Unigene_11133	ABC transporter C family member 13	235.571	17.829	0.0756841	-3.72387	0.0208159	Yes	0.395502	No	Down
XP_011096621	CDS_10358_Unigene_19541	CDS_887_Unigene_2055	PREDICTED: uncharacterized protein LOC105175754	222.11	1960	8.82446	3.14151	0.0207652	Yes	0.395502	No	Up
XP_012835527	CDS_12312_Unigene_22353	CDS_18156_Unigene_29796	wall-associated receptor kinase 2-like	13.4612	135.5	10.066	3.33142	0.0208017	Yes	0.395502	No	Up
XP_012853971	CDS_21903_Unigene_35850	CDS_16613_Unigene_27628	PREDICTED: uncharacterized protein At1g04910-like	54.6862	728.612	13.3235	3.7359	0.0208612	Yes	0.395868	No	Up
XP_011082592	CDS_3811_Unigene_8314	CDS_11525_Unigene_20222	LONGIFOLIA 1-like	20.1918	273.378	13.539	3.75905	0.0209099	Yes	0.396296	No	Up
XP_011072253	CDS_20769_Unigene_34138	CDS_7239_Unigene_13710	bifunctional UDP-glucose 4-epimerase and UDP-xylose 4-epimerase 1-like	337.372	2610.17	7.73676	2.95173	0.0209484	Yes	0.396532	No	Up
XP_011075608	CDS_6939_Unigene_13842	CDS_15177_Unigene_25599	PREDICTED: kinesin-4	257.446	19.0176	0.0738703	-3.75886	0.021068	Yes	0.397735	No	Down
XP_011079974	CDS_32776_Unigene_51061	CDS_23447_Unigene_37104	HUA2 2	1897.19	212.759	0.112144	-3.15657	0.0210547	Yes	0.397735	No	Down
XP_011095527	CDS_1336_Unigene_2896	CDS_23984_Unigene_37881	mitochondrial import inner membrane translocase subunit TIM50	185.933	1729.41	9.30126	3.21743	0.0210906	Yes	0.397735	No	Up
XP_011079404	CDS_18333_Unigene_30843	CDS_19204_Unigene_31266	transmembrane 9 superfamily member 9-like	4099.78	629.958	0.153656	-2.70222	0.021237	Yes	0.399999	No	Down
XP_011095310	CDS_38533_Unigene_59024	CDS_9459_Unigene_17184	PREDICTED: uncharacterized protein LOC105174809	1654.89	174.724	0.105581	-3.24358	0.0213167	Yes	0.400452	No	Down
XP_011100536	CDS_15820_Unigene_27344	CDS_8420_Unigene_15596	PREDICTED: LOW QUALITY PROTEIN: uncharacterized protein LOC105178703	689.046	51.1098	0.0741747	-3.75293	0.0213258	Yes	0.400452	No	Down
XP_011099832	CDS_10613_Unigene_19893	CDS_10145_Unigene_18190	PREDICTED: LOW QUALITY PROTEIN: uncharacterized protein LOC105178147	169.107	1616.5	9.55904	3.25687	0.0213402	Yes	0.400452	No	Up
XP_011085695	CDS_30734_Unigene_48052	CDS_29927_Unigene_46082	SNF1-related kinase catalytic subunit alpha KIN10-like	2355.71	294.773	0.125131	-2.99849	0.0216709	Yes	0.405655	No	Down
XP_011097735	CDS_2438_Unigene_5649	CDS_9017_Unigene_16574	PREDICTED: uncharacterized protein LOC105176570 isoform X2	780.751	60.6186	0.0776414	-3.68703	0.0216693	Yes	0.405655	No	Down
XP_011089405	CDS_7478_Unigene_14872	CDS_6956_Unigene_13202	nudix hydrolase 9 isoform X1	953.222	79.6362	0.0835442	-3.58132	0.0217848	Yes	0.407284	No	Down
XP_011074314	CDS_19044_Unigene_31802	CDS_9480_Unigene_17225	PREDICTED: uncharacterized protein LOC105159071	2278.31	281.698	0.123643	-3.01574	0.0218162	Yes	0.407369	No	Down
XP_011091799	CDS_19217_Unigene_32044	CDS_14486_Unigene_24550	NAD-dependent malic enzyme 59 kDa mitochondrial	3457.01	509.909	0.1475	-2.76121	0.0219085	Yes	0.408592	No	Down
XP_011088916	CDS_15275_Unigene_26540	CDS_16244_Unigene_27146	vesicle-associated membrane 714	292.781	2335.6	7.97728	2.9959	0.0219388	Yes	0.408653	No	Up
XP_011077816	CDS_21162_Unigene_34746	CDS_24619_Unigene_38704	UPF0554 isoform X2	810.197	64.1844	0.0792207	-3.65798	0.0220059	Yes	0.408866	No	Down
XP_011090966	CDS_6607_Unigene_13288	CDS_1794_Unigene_3877	translocase of chloroplast chloroplastic-like	111.896	1207.62	10.7923	3.43193	0.0220287	Yes	0.408866	No	Up
XP_011091176	CDS_21731_Unigene_35557	CDS_20695_Unigene_33302	PREDICTED: uncharacterized protein LOC105171682	56.3688	729.8	12.9469	3.69453	0.022031	Yes	0.408866	No	Up
XP_011091726	CDS_26486_Unigene_42057	CDS_10449_Unigene_18617	probable LRR receptor-like serine threonine- kinase At3g47570	927.141	77.259	0.0833303	-3.58501	0.0221272	Yes	0.409886	No	Down
XP_011095572	CDS_25578_Unigene_40779	CDS_23897_Unigene_37728	far upstream element-binding 2 isoform X2	1076.9	95.088	0.0882981	-3.50147	0.022145	Yes	0.409886	No	Down
XP_011084943	CDS_15131_Unigene_26317	CDS_7664_Unigene_14380	PREDICTED: uncharacterized protein LOC105167077	53.0035	692.954	13.0737	3.7086	0.0222203	Yes	0.409886	No	Up
XP_011089309	CDS_14443_Unigene_25416	CDS_1092_Unigene_2357	F-box kelch-repeat At5g60570	564.53	3719.13	6.58801	2.71984	0.0221801	Yes	0.409886	No	Up
XP_012841971	CDS_35183_Unigene_54454	CDS_31243_Unigene_47964	STRUBBELIG-RECEPTOR FAMILY 8	158.169	1526.16	9.64891	3.27037	0.0222209	Yes	0.409886	No	Up
XP_011085359	CDS_31679_Unigene_49391	CDS_7678_Unigene_14408	STRUBBELIG-RECEPTOR FAMILY 3-like	954.905	80.8248	0.0846417	-3.56249	0.0223302	Yes	0.411039	No	Down
XP_011088662	CDS_31970_Unigene_49827	CDS_30322_Unigene_46651	rop guanine nucleotide exchange factor 1	73.1954	884.318	12.0816	3.59474	0.0223579	Yes	0.411039	No	Up
XP_012844295	CDS_24315_Unigene_39067	CDS_23685_Unigene_37444	cinnamoyl- reductase 1-like	269.224	2190.59	8.13667	3.02444	0.0223647	Yes	0.411039	No	Up
XP_011075974	CDS_11895_Unigene_21793	CDS_21752_Unigene_34784	membrane of ER body	95.9112	1075.68	11.2154	3.48741	0.022435	Yes	0.411832	No	Up
XP_011075488	CDS_14872_Unigene_25999	CDS_6784_Unigene_12895	PREDICTED: uncharacterized protein LOC105159953 isoform X2	432.442	30.9036	0.071463	-3.80666	0.0225721	Yes	0.413849	No	Down
XP_009791082	CDS_15354_Unigene_26660	CDS_6144_Unigene_11915	DNA-(apurinic or apyrimidinic site) lyase	744.574	58.2414	0.0782211	-3.6763	0.0226202	Yes	0.41423	No	Down
XP_011074754	CDS_27837_Unigene_44008	CDS_6308_Unigene_12138	PREDICTED: protein FAM188A	114.42	1212.37	10.5958	3.40542	0.02281	Yes	0.417166	No	Up
XP_011089770	CDS_22356_Unigene_36448	CDS_10488_Unigene_18673	alpha-ketoglutarate-dependent dioxygenase alkB homolog 6 isoform X2	17.6678	206.816	11.7058	3.54915	0.0228355	Yes	0.417166	No	Up
XP_011070639	CDS_1794_Unigene_4244	CDS_5219_Unigene_10096	1-phosphatidylinositol 3-phosphate 5-kinase	152.28	1473.86	9.67864	3.2748	0.0228852	Yes	0.417572	No	Up
XP_011073043	CDS_11994_Unigene_21949	CDS_3114_Unigene_6255	probable LRR receptor-like serine threonine- kinase At1g74360	263.335	20.2062	0.0767319	-3.70403	0.0229713	Yes	0.417637	No	Down
XP_012858941	CDS_15148_Unigene_26336	CDS_3312_Unigene_6619	subtilisin-like protease	3255.93	477.817	0.146753	-2.76854	0.0229191	Yes	0.417637	No	Down
XP_011088392	CDS_21479_Unigene_35242	CDS_17996_Unigene_29548	BTB POZ domain-containing At3g05675-like	172.472	1602.23	9.28982	3.21565	0.0229564	Yes	0.417637	No	Up
XP_011071116	CDS_17189_Unigene_29310	CDS_1595_Unigene_3587	cysteine-rich receptor kinase 2	48.7969	638.278	13.0803	3.70932	0.0230547	Yes	0.417682	No	Up
XP_011088863	CDS_16435_Unigene_28264	CDS_19895_Unigene_32206	probable aldo-keto reductase 2 isoform X1	567.895	3697.73	6.5113	2.70294	0.0230178	Yes	0.417682	No	Up
XP_011090260	CDS_3844_Unigene_8381	CDS_8531_Unigene_15795	feruloyl ortho-hydroxylase 1-like	45.4316	601.431	13.2382	3.72663	0.0230563	Yes	0.417682	No	Up
XP_011097229	CDS_6144_Unigene_12520	CDS_521_Unigene_1121	homeobox-leucine zipper ATHB-40-like	169.107	15.4518	0.0913731	-3.45209	0.023199	Yes	0.419767	No	Down
XP_011096089	CDS_20363_Unigene_33586	CDS_1263_Unigene_2791	abnormal spindle-like microcephaly-associated homolog isoform X2	572.943	42.7896	0.0746838	-3.74306	0.0233372	Yes	0.420762	No	Down
XP_012853209	CDS_7257_Unigene_14468	CDS_34364_Unigene_52718	PREDICTED: LOW QUALITY PROTEIN: uncharacterized protein LOC105972773	3193.67	468.308	0.146636	-2.76969	0.0233196	Yes	0.420762	No	Down
XP_012849527	CDS_12238_Unigene_22259	CDS_16673_Unigene_27728	PREDICTED: uncharacterized protein LOC105969316	117.786	1227.82	10.4242	3.38187	0.0233329	Yes	0.420762	No	Up
XP_011092240	CDS_35059_Unigene_54292	CDS_32437_Unigene_49559	probable leucine-rich repeat receptor kinase At5g49770 isoform X3	223.793	1900.57	8.49255	3.0862	0.0234685	Yes	0.422628	No	Up
XP_011094009	CDS_16457_Unigene_28293	CDS_27130_Unigene_42170	DNA-directed RNA polymerase III subunit RPC4	299.512	22.5834	0.0754006	-3.72928	0.0235944	Yes	0.424072	No	Down
XP_011084595	CDS_680_Unigene_1625	CDS_35552_Unigene_55334	PREDICTED: uncharacterized protein LOC105166806	858.153	5166.84	6.02089	2.58998	0.0236045	Yes	0.424072	No	Up
XP_011073904	CDS_11626_Unigene_21359	CDS_7224_Unigene_13685	pentatricopeptide repeat-containing mitochondrial	233.889	19.0176	0.0813105	-3.62042	0.0238405	Yes	0.427593	No	Down
XP_011089318	CDS_33739_Unigene_52469	CDS_15947_Unigene_26742	zinc finger JACKDAW	4205.79	677.502	0.161088	-2.63408	0.0238569	Yes	0.427593	No	Down
XP_012847135	CDS_574_Unigene_1283	CDS_18864_Unigene_30792	NUCLEAR FUSION DEFECTIVE 4-like	14.3025	135.5	9.47386	3.24395	0.0239088	Yes	0.428017	No	Up
XP_011084521	CDS_7531_Unigene_14957	CDS_5465_Unigene_10608	phosphatase 2C 57	3149.08	17886	5.67976	2.50583	0.0240305	Yes	0.429186	No	Up
XP_011094448	CDS_12344_Unigene_22414	CDS_11742_Unigene_20565	pentatricopeptide repeat-containing At5g03800	43.749	571.716	13.0681	3.70798	0.024015	Yes	0.429186	No	Up
XP_011084157	CDS_30613_Unigene_47864	CDS_26895_Unigene_41856	protection of telomeres 1b isoform X2	629.312	48.7326	0.0774379	-3.69082	0.0241357	Yes	0.430026	No	Down
XP_011099764	CDS_4776_Unigene_10196	CDS_3336_Unigene_6651	PREDICTED: LOW QUALITY PROTEIN: uncharacterized protein LOC105178099	367.66	27.3378	0.0743563	-3.7494	0.0241626	Yes	0.430026	No	Down
XP_011085973	CDS_130_Unigene_328	CDS_7020_Unigene_13305	PREDICTED: uncharacterized protein LOC105167841	15.1439	149.764	9.88939	3.30588	0.0241119	Yes	0.430026	No	Up
XP_011083238	CDS_1687_Unigene_3892	CDS_6270_Unigene_12087	probable carboxylesterase 18	67.3061	804.682	11.9556	3.57961	0.0242817	Yes	0.43164	No	Up
XP_011071246	CDS_40326_Unigene_63847	CDS_5732_Unigene_11208	bidirectional sugar transporter N3	140.501	14.2632	0.101516	-3.30022	0.0243825	Yes	0.432419	No	Down
XP_011078216	CDS_28736_Unigene_45226	CDS_16924_Unigene_28103	ATP-dependent DNA helicase Q-like 3	86.6566	969.897	11.1924	3.48445	0.0243746	Yes	0.432419	No	Up
XP_012851448	CDS_5794_Unigene_11965	CDS_35689_Unigene_55913	WAT1-related chloroplastic	365.977	2647.01	7.23273	2.85454	0.0244246	Yes	0.43266	No	Up
XP_011087967	CDS_32741_Unigene_51006	CDS_27120_Unigene_42161	S phase cyclin A-associated in the endoplasmic reticulum-like	1511.86	162.838	0.107707	-3.21482	0.0245109	Yes	0.432674	No	Down
XP_011082324	CDS_25904_Unigene_41225	CDS_21049_Unigene_33812	PREDICTED: uncharacterized protein LOC105165127 isoform X2	157.328	1475.05	9.37565	3.22892	0.0245009	Yes	0.432674	No	Up
XP_011095492	CDS_135_Unigene_357	CDS_2809_Unigene_5760	MO25 At5g47540	40.3837	527.738	13.0681	3.70798	0.024485	Yes	0.432674	No	Up
XP_011097335	CDS_19037_Unigene_31787	CDS_3423_Unigene_6848	F-box At3g07870-like	636.884	49.9212	0.0783835	-3.67331	0.0245694	Yes	0.433203	No	Down
XP_011071940	CDS_25611_Unigene_40812	CDS_21198_Unigene_34046	DEAD-box ATP-dependent RNA helicase 20 isoform X2	121.992	1233.77	10.1135	3.33821	0.024747	Yes	0.435829	No	Up
XP_011096740	CDS_12156_Unigene_22157	CDS_437_Unigene_952	UDP-arabinose 4-epimerase 1	1360.42	140.255	0.103096	-3.27793	0.0247941	Yes	0.436153	No	Down
XP_011086897	CDS_38100_Unigene_58357	CDS_33912_Unigene_51583	PREDICTED: retinoblastoma-related protein	2703.18	381.541	0.141145	-2.82475	0.0251695	Yes	0.436674	No	Down
XP_011095683	CDS_11653_Unigene_21396	CDS_15743_Unigene_26439	BTB POZ domain-containing At1g04390	286.892	22.5834	0.0787174	-3.66717	0.0251575	Yes	0.436674	No	Down
XP_011101790	CDS_37023_Unigene_56893	CDS_33240_Unigene_50638	transcription elongation factor SPT5 homolog 1	2569.41	354.203	0.137854	-2.85879	0.0250493	Yes	0.436674	No	Down
XP_012852071	CDS_17033_Unigene_29096	CDS_22520_Unigene_35831	calcineurin B 4	158.169	15.4518	0.0976915	-3.35562	0.0251212	Yes	0.436674	No	Down
XP_009604301	CDS_2660_Unigene_6155	CDS_2274_Unigene_4846	probable LRR receptor-like serine threonine- kinase At3g47570	113.579	1166.02	10.2661	3.35982	0.0251977	Yes	0.436674	No	Up
XP_011072388	CDS_10810_Unigene_20194	CDS_3693_Unigene_7441	transcription factor bHLH68-like isoform X1	27.7638	361.334	13.0146	3.70206	0.0249123	Yes	0.436674	No	Up
XP_011074405	CDS_12524_Unigene_22689	CDS_16213_Unigene_27103	transcription factor EMB1444-like	117.786	1201.67	10.2022	3.35081	0.0248744	Yes	0.436674	No	Up
XP_011085673	CDS_27386_Unigene_43349	CDS_9055_Unigene_16625	PREDICTED: uncharacterized protein LOC105167598	238.095	1946.93	8.17709	3.03159	0.0249795	Yes	0.436674	No	Up
XP_011089290	CDS_26677_Unigene_42347	CDS_6242_Unigene_12053	GRAM domain-containing 1A	190.14	1668.79	8.77667	3.13367	0.0249628	Yes	0.436674	No	Up
XP_011090010	CDS_38992_Unigene_60283	CDS_21849_Unigene_34922	pleiotropic drug resistance 2-like	34.4944	449.291	13.025	3.70322	0.0251447	Yes	0.436674	No	Up
XP_011097813	CDS_13932_Unigene_24636	CDS_13608_Unigene_23312	auxin transporter 3	180.044	1604.61	8.91233	3.1558	0.0251238	Yes	0.436674	No	Up
XP_011097972	CDS_17452_Unigene_29660	CDS_20693_Unigene_33296	polyadenylate-binding RBP45-like	1060.07	6131.99	5.78451	2.53219	0.025158	Yes	0.436674	No	Up
XP_012857823	CDS_23393_Unigene_37789	CDS_13897_Unigene_23714	wall-associated receptor kinase-like 8	344.102	2513.89	7.30564	2.86901	0.0251672	Yes	0.436674	No	Up
XP_011088448	CDS_34535_Unigene_53565	CDS_32245_Unigene_49285	SUMO-activating enzyme subunit 2	2997.64	443.348	0.147899	-2.75732	0.0254356	Yes	0.440294	No	Down
XP_011071947	CDS_6769_Unigene_13598	CDS_2058_Unigene_4425	pentatricopeptide repeat-containing At1g08070-like	19.3505	219.891	11.3636	3.50635	0.0255201	Yes	0.440752	No	Up
XP_012841462	CDS_28647_Unigene_45090	CDS_27741_Unigene_43032	NEDD8-activating enzyme E1 regulatory subunit	77.402	877.187	11.3329	3.50244	0.0255075	Yes	0.440752	No	Up
XP_011090284	CDS_24584_Unigene_39452	CDS_27218_Unigene_42276	PREDICTED: uncharacterized protein LOC105170997	857.311	74.8818	0.0873449	-3.51713	0.0256398	Yes	0.441813	No	Down
XP_011091794	CDS_18553_Unigene_31137	CDS_1787_Unigene_3862	ubiquitin carboxyl-terminal hydrolase 24	1720.51	200.873	0.116752	-3.09848	0.025622	Yes	0.441813	No	Down
XP_011078073	CDS_37913_Unigene_58079	CDS_28590_Unigene_44266	PREDICTED: uncharacterized protein LOC105161915	1197.21	118.86	0.099281	-3.33234	0.0257822	Yes	0.443763	No	Down
XP_011073037	CDS_27827_Unigene_43997	CDS_31266_Unigene_47984	retrovirus-related Pol poly from transposon TNT 1-94	21.8745	262.681	12.0085	3.58599	0.0258595	Yes	0.444275	No	Up
XP_011088157	CDS_28818_Unigene_45341	CDS_24677_Unigene_38777	cytokinin dehydrogenase 6-like	19.3505	217.514	11.2407	3.49066	0.0258704	Yes	0.444275	No	Up
XP_012854045	CDS_27048_Unigene_42822	CDS_1520_Unigene_3461	late blight resistance homolog R1A-10	218.745	19.0176	0.0869397	-3.52384	0.0259395	Yes	0.444958	No	Down
XP_011076924	CDS_16809_Unigene_28765	CDS_22588_Unigene_35929	hippocampus abundant transcript 1 isoform X1	1908.97	235.343	0.123283	-3.01996	0.0260318	Yes	0.446038	No	Down
XP_011086850	CDS_14166_Unigene_24994	CDS_13857_Unigene_23665	pyruvate dehydrogenase E1 component subunit beta- mitochondrial-like	33.653	430.273	12.7856	3.67644	0.026078	Yes	0.446325	No	Up
XP_011070262	CDS_20035_Unigene_33176	CDS_22408_Unigene_35666	decapping nuclease DXO chloroplastic	192.664	1660.47	8.61851	3.10744	0.0261268	Yes	0.446656	No	Up
XP_011074888	CDS_8807_Unigene_17158	CDS_20272_Unigene_32698	MYST-like histone acetyltransferase 2 isoform X1	2179.88	285.264	0.130862	-2.93388	0.0261599	Yes	0.446719	No	Down
XP_011074253	CDS_23717_Unigene_38208	CDS_25494_Unigene_39932	PREDICTED: uncharacterized protein LOC105159021	540.131	42.7896	0.0792207	-3.65798	0.0264731	Yes	0.447338	No	Down
XP_011082799	CDS_18656_Unigene_31262	CDS_3731_Unigene_7514	NADH kinase-like isoform X1	580.515	46.3554	0.0798522	-3.64652	0.0263315	Yes	0.447338	No	Down
XP_011091062	CDS_11056_Unigene_20545	CDS_9290_Unigene_16945	GAMETE EXPRESSED 2	365.977	28.5264	0.0779459	-3.68138	0.0263551	Yes	0.447338	No	Down
XP_011092213	CDS_20291_Unigene_33478	CDS_20603_Unigene_33183	notum homolog	1927.48	240.097	0.124565	-3.00502	0.0263962	Yes	0.447338	No	Down
XP_012831599	CDS_31388_Unigene_48962	CDS_23838_Unigene_37652	MORC family CW-type zinc finger 3	816.086	71.316	0.0873878	-3.51642	0.0264908	Yes	0.447338	No	Down
XP_010519017	CDS_10003_Unigene_18973	CDS_16314_Unigene_27221	choline-phosphate cytidylyltransferase 1-like isoform X2	456.84	3032.12	6.63715	2.73056	0.026364	Yes	0.447338	No	Up
XP_011072157	CDS_5763_Unigene_11903	CDS_6591_Unigene_12561	PREDICTED: uncharacterized protein LOC105157447	16.8265	168.781	10.0307	3.32634	0.0263184	Yes	0.447338	No	Up
XP_011089046	CDS_16791_Unigene_28749	CDS_251_Unigene_541	PREDICTED: uncharacterized protein LOC105170123	74.0367	836.774	11.3022	3.49853	0.0264388	Yes	0.447338	No	Up
XP_011091270	CDS_19656_Unigene_32660	CDS_1041_Unigene_2276	PREDICTED: uncharacterized protein LOC105171755	31.1291	394.615	12.6767	3.66411	0.0264457	Yes	0.447338	No	Up
XP_012841478	CDS_33398_Unigene_52001	CDS_11279_Unigene_19839	PREDICTED: uncharacterized protein LOC105961762	125.358	1231.39	9.82301	3.29617	0.0263394	Yes	0.447338	No	Up
XP_011072498	CDS_21919_Unigene_35873	CDS_9566_Unigene_17358	thioredoxin-like chloroplastic	37.8597	477.817	12.6207	3.65772	0.026534	Yes	0.44757	No	Up
XP_011076732	CDS_9039_Unigene_17502	CDS_2337_Unigene_4950	zinc finger JAGGED-like isoform X2	171.631	16.6404	0.0969548	-3.36654	0.026611	Yes	0.447862	No	Down
XP_011101410	CDS_34152_Unigene_53021	CDS_32248_Unigene_49291	nucleobase-ascorbate transporter 2	1328.45	140.255	0.105577	-3.24363	0.0266693	Yes	0.447862	No	Down
XP_012855398	CDS_688_Unigene_1649	CDS_5087_Unigene_9840	1,4-dihydroxy-2-naphthoyl- peroxisomal	1802.12	218.702	0.121358	-3.04265	0.026647	Yes	0.447862	No	Down
XP_012834804	CDS_27660_Unigene_43742	CDS_13963_Unigene_23808	PREDICTED: uncharacterized protein LOC105955596	31.1291	393.427	12.6386	3.65976	0.0265902	Yes	0.447862	No	Up
XP_011075526	CDS_12798_Unigene_23033	CDS_7952_Unigene_14852	probable sulfate transporter	1491.67	166.404	0.111555	-3.16417	0.0268078	Yes	0.44969	No	Down
XP_011074068	CDS_35244_Unigene_54552	CDS_7511_Unigene_14147	monosaccharide-sensing 2-like	1277.97	133.123	0.104167	-3.26303	0.0268739	Yes	0.449872	No	Down
XP_011085219	CDS_36705_Unigene_56461	CDS_2971_Unigene_6018	cation-chloride cotransporter 1	682.315	57.0528	0.0836164	-3.58007	0.026897	Yes	0.449872	No	Down
XP_011097026	CDS_11283_Unigene_20906	CDS_5618_Unigene_10965	PREDICTED: uncharacterized protein LOC105176044	406.361	2773	6.824	2.77062	0.0269076	Yes	0.449872	No	Up
XP_011084314	CDS_16392_Unigene_28206	CDS_8837_Unigene_16291	OTU domain-containing DDB_G0284757 isoform X1	29.4464	367.277	12.4727	3.64071	0.0270599	Yes	0.451922	No	Up
XP_011091060	CDS_4232_Unigene_9239	CDS_4766_Unigene_9262	condensin-2 complex subunit D3	645.297	53.487	0.0828874	-3.5927	0.0271356	Yes	0.452687	No	Down
XP_011098502	CDS_39711_Unigene_62157	CDS_8589_Unigene_15907	UDP-glycosyltransferase 90A1-like	210.332	19.0176	0.0904172	-3.46726	0.0272435	Yes	0.453988	No	Down
XP_011092253	CDS_7524_Unigene_14942	CDS_18473_Unigene_30253	glutamate receptor -like	1105.5	109.351	0.0989154	-3.33766	0.0273293	Yes	0.454676	No	Down
XP_012836677	CDS_37721_Unigene_57841	CDS_13056_Unigene_22537	receptor 12	1087.83	106.974	0.0983366	-3.34613	0.0273447	Yes	0.454676	No	Down
XP_011079603	CDS_28323_Unigene_44676	CDS_23935_Unigene_37789	probable galacturonosyltransferase-like 7	893.488	82.0134	0.0917901	-3.44552	0.0274776	Yes	0.456387	No	Down
XP_011099316	CDS_14955_Unigene_26099	CDS_7665_Unigene_14381	probable receptor kinase At5g24010	2571.93	368.466	0.143264	-2.80325	0.0275177	Yes	0.456553	No	Down
XP_011090978	CDS_32575_Unigene_50738	CDS_6823_Unigene_12976	PREDICTED: kinesin-13A	1556.45	179.479	0.115313	-3.11638	0.0276086	Yes	0.457543	No	Down
XP_011095407	CDS_23958_Unigene_38569	CDS_5369_Unigene_10390	probable beta-1,3-galactosyltransferase 2	247.35	1938.61	7.83751	2.97039	0.0276678	Yes	0.457543	No	Up
XP_012856497	CDS_1907_Unigene_4437	CDS_3256_Unigene_6521	D-3-phosphoglycerate dehydrogenase chloroplastic-like	1432.78	7920.83	5.5283	2.46684	0.0276676	Yes	0.457543	No	Up
XP_011070151	CDS_39883_Unigene_62719	CDS_34229_Unigene_52044	PREDICTED: uncharacterized protein LOC105155864	811.88	72.5046	0.0893046	-3.48512	0.0277107	Yes	0.457743	No	Down
XP_011095707	CDS_29115_Unigene_45707	CDS_22494_Unigene_35794	nucleolar complex 3 homolog	2574.46	370.843	0.144047	-2.79539	0.0278608	Yes	0.457743	No	Down
XP_003593234	CDS_12972_Unigene_23286	CDS_15411_Unigene_25940	2-oxoglutarate malate translocator	6.73061	38.0352	5.65108	2.49853	0.0278322	Yes	0.457743	No	Up
XP_011087884	CDS_4987_Unigene_10610	CDS_9880_Unigene_17801	copper-transporting ATPase chloroplastic	123.675	1196.92	9.67795	3.2747	0.0278347	Yes	0.457743	No	Up
XP_012842343	CDS_35065_Unigene_54297	CDS_32453_Unigene_49571	probable leucine-rich repeat receptor kinase At5g49770	153.963	1396.6	9.07106	3.18127	0.0277419	Yes	0.457743	No	Up
XP_012846950	CDS_23966_Unigene_38576	CDS_30617_Unigene_47077	wall-associated receptor kinase-like 11	42.9076	524.172	12.2163	3.61074	0.0278211	Yes	0.457743	No	Up
XP_011082602	CDS_17124_Unigene_29219	CDS_18736_Unigene_30617	PREDICTED: protein OSB4, chloroplastic-like	7518.93	1363.32	0.181319	-2.4634	0.0279451	Yes	0.458208	No	Down
XP_011094239	CDS_39915_Unigene_62766	CDS_2055_Unigene_4423	PREDICTED: syntaxin-121	1197.21	123.614	0.103252	-3.27575	0.0279494	Yes	0.458208	No	Down
XP_011076448	CDS_10386_Unigene_19583	CDS_2377_Unigene_5024	histone-lysine N- H3 lysine-9 specific SUVH5-like isoform X2	124.516	14.2632	0.114549	-3.12596	0.0283183	Yes	0.461853	No	Down
XP_011087875	CDS_7881_Unigene_15600	CDS_10884_Unigene_19235	PREDICTED: uncharacterized protein LOC105169217	679.792	58.2414	0.0856754	-3.54498	0.0282079	Yes	0.461853	No	Down
XP_011093359	CDS_2991_Unigene_6736	CDS_8487_Unigene_15714	LRR receptor-like serine threonine- kinase GSO1	1271.24	135.5	0.106589	-3.22987	0.0283239	Yes	0.461853	No	Down
XP_011087524	CDS_25800_Unigene_41070	CDS_26211_Unigene_40931	PREDICTED: uncharacterized protein LOC105168987	164.9	1454.85	8.8226	3.1412	0.0283094	Yes	0.461853	No	Up
XP_012829705	CDS_25035_Unigene_40095	CDS_23623_Unigene_37367	DNA polymerase eta isoform X3	90.8632	950.88	10.465	3.38749	0.0282589	Yes	0.461853	No	Up
XP_011083070	CDS_7276_Unigene_14506	CDS_34707_Unigene_53274	xyloglucan galactosyltransferase KATAMARI1-like	299.512	24.9606	0.0833375	-3.58489	0.0284879	Yes	0.463036	No	Down
XP_011084041	CDS_12913_Unigene_23182	CDS_3178_Unigene_6374	PREDICTED: uncharacterized protein LOC105166397	162.376	16.6404	0.102481	-3.28658	0.028467	Yes	0.463036	No	Down
XP_011094845	CDS_14796_Unigene_25912	CDS_3600_Unigene_7268	xylosyltransferase 2	890.964	83.202	0.0933842	-3.42068	0.0284705	Yes	0.463036	No	Down
XP_011078916	CDS_35402_Unigene_54773	CDS_24335_Unigene_38293	nuclear pore complex NUP93A-like	190.14	1599.86	8.4141	3.07281	0.0285925	Yes	0.464238	No	Up
XP_011086364	CDS_20863_Unigene_34270	CDS_19263_Unigene_31340	PREDICTED: LOW QUALITY PROTEIN: uncharacterized protein LOC105168115	219.586	1766.26	8.04358	3.00784	0.0286319	Yes	0.464381	No	Up
XP_011090607	CDS_2159_Unigene_4874	CDS_4795_Unigene_9308	E3 ubiquitin- ligase RKP	137.136	1274.18	9.29134	3.21589	0.0286913	Yes	0.464849	No	Up
XP_011073560	CDS_31394_Unigene_48970	CDS_1455_Unigene_3355	kinesin KIF22	393.741	32.0922	0.0815059	-3.61695	0.0287887	Yes	0.464938	No	Down
XP_011100640	CDS_20522_Unigene_33799	CDS_26635_Unigene_41536	dehydrogenase reductase SDR family member 12	1564.03	184.233	0.117794	-3.08566	0.028777	Yes	0.464938	No	Down
XP_011100352	CDS_5530_Unigene_11537	CDS_3157_Unigene_6330	mitotic checkpoint serine threonine- kinase BUB1	18.5092	185.422	10.0178	3.3245	0.0287559	Yes	0.464938	No	Up
XP_011077249	CDS_16263_Unigene_28034	CDS_17218_Unigene_28510	probable receptor kinase At5g47070	227.999	1807.86	7.92923	2.98718	0.02889	Yes	0.465571	No	Up
XP_012836697	CDS_15273_Unigene_26537	CDS_28452_Unigene_44065	3-phosphoinositide-dependent kinase 2-like	84.1326	890.261	10.5816	3.40349	0.028898	Yes	0.465571	No	Up
XP_015168676	CDS_20156_Unigene_33310	CDS_21533_Unigene_34490	glutamate receptor -like isoform X2	12.6199	93.8994	7.44059	2.89542	0.02892	Yes	0.465571	No	Up
XP_011072017	CDS_14208_Unigene_25048	CDS_16414_Unigene_27359	TPR repeat-containing thioredoxin TDX	1703.69	209.194	0.122789	-3.02575	0.0289551	Yes	0.465644	No	Down
XP_012829750	CDS_37120_Unigene_57026	CDS_31058_Unigene_47710	cytochrome chloroplastic	777.385	70.1274	0.0902093	-3.47058	0.0289892	Yes	0.465699	No	Down
XP_011073823	CDS_36016_Unigene_55526	CDS_32091_Unigene_49079	probable importin-7 homolog	1687.7	206.816	0.122543	-3.02864	0.0290992	Yes	0.465823	No	Down
XP_011080513	CDS_10931_Unigene_20368	CDS_11374_Unigene_19988	probable inactive receptor kinase At5g10020	1961.13	256.738	0.130913	-2.93332	0.02908	Yes	0.465823	No	Down
XP_011072033	CDS_26047_Unigene_41436	CDS_23478_Unigene_37163	bifunctional D-cysteine desulfhydrase 1-aminocyclopropane-1-carboxylate mitochondrial	1127.38	6199.74	5.49926	2.45924	0.0291197	Yes	0.465823	No	Up
XP_012065458	CDS_2859_Unigene_6494	CDS_26019_Unigene_40668	PREDICTED: uncharacterized protein LOC105628624	116.944	1132.74	9.68611	3.27592	0.0290616	Yes	0.465823	No	Up
XP_011074285	CDS_30051_Unigene_47045	CDS_21302_Unigene_34191	PREDICTED: uncharacterized protein LOC105159050	528.353	43.9782	0.0832364	-3.58664	0.0291544	Yes	0.465888	No	Down
XP_012856361	CDS_10067_Unigene_19073	CDS_4559_Unigene_8856	late blight resistance homolog R1B-17	44.5903	530.115	11.8886	3.57151	0.0292096	Yes	0.466279	No	Up
XP_011097533	CDS_10582_Unigene_19850	CDS_19022_Unigene_31014	LMBR1 domain-containing 2 homolog A	1492.51	173.536	0.116271	-3.10444	0.0292879	Yes	0.466548	No	Down
XP_011089848	CDS_33362_Unigene_51959	CDS_31108_Unigene_47769	PREDICTED: LOW QUALITY PROTEIN: phototropin-1	1439.51	7811.48	5.42649	2.44002	0.0292719	Yes	0.466548	No	Up
XP_011083563	CDS_7895_Unigene_15630	CDS_5715_Unigene_11171	E3 ubiquitin- ligase LIN	403.837	33.2808	0.0824115	-3.60101	0.0294012	Yes	0.467372	No	Down
XP_012845549	CDS_30580_Unigene_47821	CDS_31981_Unigene_48917	pollen-specific SF21	2767.12	419.576	0.151629	-2.72138	0.0293894	Yes	0.467372	No	Down
XP_011084327	CDS_7500_Unigene_14908	CDS_213_Unigene_481	endoplasmic reticulum metallopeptidase 1 isoform X1	1005.38	99.8424	0.0993076	-3.33195	0.0295572	Yes	0.469359	No	Down
XP_011071319	CDS_5609_Unigene_11654	CDS_19731_Unigene_32003	pyruvate dehydrogenase (acetyl-transferring) mitochondrial	1602.73	193.742	0.120883	-3.04832	0.0297205	Yes	0.470768	No	Down
XP_012842384	CDS_5543_Unigene_11550	CDS_3443_Unigene_6896	MLO 13	401.313	33.2808	0.0829299	-3.59196	0.0297389	Yes	0.470768	No	Down
XP_011081539	CDS_22717_Unigene_36905	CDS_20446_Unigene_32936	PREDICTED: uncharacterized protein LOC105164560	327.276	2311.83	7.06385	2.82045	0.0297339	Yes	0.470768	No	Up
XP_011088033	CDS_6004_Unigene_12297	CDS_10911_Unigene_19276	structural maintenance of chromosomes 5	939.761	91.5222	0.0973888	-3.3601	0.0298151	Yes	0.470992	No	Down
XP_012843081	CDS_565_Unigene_1266	CDS_8610_Unigene_15945	tetratricopeptide repeat 7A isoform X2	674.744	59.43	0.0880779	-3.50508	0.029815	Yes	0.470992	No	Down
XP_011100067	CDS_6628_Unigene_13327	CDS_4153_Unigene_8184	haloacid dehalogenase-like hydrolase domain-containing At4g39970	1306.58	7067.41	5.4091	2.43539	0.0298605	Yes	0.471218	No	Up
XP_011075723	CDS_15523_Unigene_26909	CDS_29193_Unigene_45077	heparan-alpha-glucosaminide N-acetyltransferase-like	111.055	1079.25	9.71814	3.28068	0.0299444	Yes	0.472052	No	Up
XP_006288773	CDS_21396_Unigene_35090	CDS_3875_Unigene_7782	hypothetical protein CARUB_v10002094mg, partial	16044.9	3034.5	0.189125	-2.40259	0.0302485	Yes	0.472648	No	Down
XP_011079900	CDS_12621_Unigene_22813	CDS_568_Unigene_1260	serine threonine- kinase Nek2	568.736	48.7326	0.0856857	-3.5448	0.0302022	Yes	0.472648	No	Down
XP_011091523	CDS_26684_Unigene_42353	CDS_1986_Unigene_4258	glucan endo-1,3-beta-glucosidase-like	580.515	49.9212	0.0859947	-3.53961	0.030218	Yes	0.472648	No	Down
XP_011091811	CDS_12326_Unigene_22380	CDS_6667_Unigene_12660	crossover junction endonuclease MUS81 isoform X1	269.224	23.772	0.0882981	-3.50147	0.0303999	Yes	0.472648	No	Down
XP_011092137	CDS_30523_Unigene_47730	CDS_26994_Unigene_41997	GTP-binding SAR1A	1122.33	117.671	0.104846	-3.25366	0.0303883	Yes	0.472648	No	Down
XP_011092977	CDS_3093_Unigene_6948	CDS_5258_Unigene_10172	PREDICTED: uncharacterized protein LOC105173032	369.342	30.9036	0.083672	-3.57911	0.0300754	Yes	0.472648	No	Down
XP_011095629	CDS_2786_Unigene_6369	CDS_27054_Unigene_42080	probable calcium-binding CML21	478.715	40.4124	0.0844186	-3.5663	0.0304181	Yes	0.472648	No	Down
XP_011101285	CDS_29431_Unigene_46170	CDS_29517_Unigene_45518	PREDICTED: uncharacterized protein LOC105179373	2707.39	411.256	0.151901	-2.71879	0.0301747	Yes	0.472648	No	Down
XP_011078778	CDS_36765_Unigene_56514	CDS_32200_Unigene_49221	PREDICTED: uncharacterized protein LOC105162459	1299.01	6996.1	5.38573	2.42914	0.0302861	Yes	0.472648	No	Up
XP_011084141	CDS_35862_Unigene_55339	CDS_32331_Unigene_49408	transport SEC23-like	432.442	2805.1	6.48665	2.69747	0.0301957	Yes	0.472648	No	Up
XP_011089293	CDS_33933_Unigene_52751	CDS_31803_Unigene_48710	serine threonine- phosphatase 6 regulatory subunit 3-like isoform X2	299.512	2156.12	7.19877	2.84775	0.0303893	Yes	0.472648	No	Up
XP_011090489	CDS_14302_Unigene_25188	CDS_22676_Unigene_36059	PREDICTED: mucin-1-like	17.6678	164.027	9.28391	3.21473	0.0302896	Yes	0.472648	No	Up
XP_011100382	CDS_24676_Unigene_39610	CDS_24324_Unigene_38270	OTU domain-containing DDB_G0284757	228.841	1786.47	7.80659	2.96469	0.030272	Yes	0.472648	No	Up
XP_012828041	CDS_21986_Unigene_35959	CDS_10195_Unigene_18258	zeatin O-glucosyltransferase-like	47.9556	555.076	11.5748	3.53291	0.0303955	Yes	0.472648	No	Up
XP_012842178	CDS_11946_Unigene_21885	CDS_12885_Unigene_22292	probable cinnamyl alcohol dehydrogenase 1	572.943	3437.43	5.9996	2.58487	0.0305151	Yes	0.473671	No	Up
XP_011070914	CDS_1208_Unigene_2672	CDS_12334_Unigene_21446	squamosa promoter-binding partial	49.6382	569.339	11.4698	3.51976	0.0307141	Yes	0.476273	No	Up
XP_014497087	CDS_38834_Unigene_59834	CDS_10905_Unigene_19269	LURP-one-related 10-like	421.504	35.658	0.084597	-3.56325	0.0308437	Yes	0.477794	No	Down
XP_011081520	CDS_17559_Unigene_29779	CDS_13276_Unigene_22863	topless-related 1-like isoform X2	608.279	53.487	0.0879317	-3.50747	0.0310053	Yes	0.478832	No	Down
XP_011075847	CDS_11268_Unigene_20880	CDS_13140_Unigene_22662	F-box At5g07610-like isoform X2	258.287	1930.29	7.47341	2.90177	0.0309793	Yes	0.478832	No	Up
XP_011085935	CDS_24996_Unigene_40046	CDS_17562_Unigene_29017	uncharacterized aarF domain-containing kinase 1	28.6051	328.054	11.4684	3.51959	0.0309829	Yes	0.478832	No	Up
XP_011081158	CDS_16044_Unigene_27659	CDS_1565_Unigene_3543	DNA-directed RNA polymerase IV subunit 1	916.204	90.3336	0.0985955	-3.34233	0.0310679	Yes	0.479311	No	Down
XP_011072528	CDS_33404_Unigene_52008	CDS_31632_Unigene_48498	beta-galactosidase 17 isoform X2	1128.22	120.049	0.106405	-3.23236	0.0311816	Yes	0.479602	No	Down
XP_011087888	CDS_38353_Unigene_58711	CDS_4595_Unigene_8948	PREDICTED: uncharacterized protein LOC105169226	132.93	15.4518	0.116241	-3.10482	0.0311252	Yes	0.479602	No	Down
XP_011095891	CDS_17836_Unigene_30174	CDS_25432_Unigene_39842	serine threonine- kinase D6PK	3615.18	616.883	0.170637	-2.551	0.0311608	Yes	0.479602	No	Down
XP_011097009	CDS_4212_Unigene_9204	CDS_7491_Unigene_14121	zinc finger BED domain-containing DAYSLEEPER	535.083	46.3554	0.0866321	-3.52895	0.0313025	Yes	0.480151	No	Down
XP_012833866	CDS_19427_Unigene_32343	CDS_419_Unigene_913	late blight resistance homolog R1B-8 isoform X1	169.107	17.829	0.105431	-3.24564	0.03129	Yes	0.480151	No	Down
XP_011075221	CDS_3938_Unigene_8585	CDS_6390_Unigene_12248	nuclear transcription factor Y subunit A-1-like	39.5423	457.611	11.5727	3.53265	0.0313121	Yes	0.480151	No	Up
XP_011085963	CDS_21086_Unigene_34629	CDS_16802_Unigene_27917	PREDICTED: uncharacterized protein LOC105167832	2385.16	349.448	0.146509	-2.77093	0.0313472	Yes	0.480203	No	Down
XP_011075042	CDS_15778_Unigene_27286	CDS_2548_Unigene_5323	patatin 7	808.514	4495.28	5.55993	2.47507	0.0314171	Yes	0.480306	No	Up
XP_011087135	CDS_183_Unigene_430	CDS_1671_Unigene_3695	PREDICTED: uncharacterized protein LOC105168700	2492.85	13129.3	5.26677	2.39692	0.0314141	Yes	0.480306	No	Up
XP_011078620	CDS_27296_Unigene_43232	CDS_29964_Unigene_46147	chromatin assembly factor 1 subunit FAS1-like	186.774	19.0176	0.101821	-3.29589	0.0315885	Yes	0.481506	No	Down
XP_011089376	CDS_29766_Unigene_46631	CDS_29616_Unigene_45648	ethylene-responsive transcription factor RAP2-7-like	28.6051	324.488	11.3437	3.50382	0.0315372	Yes	0.481506	No	Up
XP_011095567	CDS_15304_Unigene_26589	CDS_5841_Unigene_11467	PREDICTED: uncharacterized protein LOC105174980	253.239	1892.25	7.47219	2.90153	0.0315908	Yes	0.481506	No	Up
XP_012848840	CDS_21967_Unigene_35937	CDS_22876_Unigene_36332	PREDICTED: uncharacterized protein LOC105968733	885.916	4854.24	5.47934	2.454	0.0317056	Yes	0.482771	No	Up
XP_011099351	CDS_14357_Unigene_25267	CDS_13001_Unigene_22464	PREDICTED: uncharacterized protein LOC105177798	1725.56	222.268	0.128809	-2.95669	0.0317889	Yes	0.483554	No	Down
XP_011069898	CDS_7042_Unigene_14033	CDS_8467_Unigene_15687	xyloglucan endotransglucosylase hydrolase 24-like isoform X2	9462.39	1797.16	0.189927	-2.39648	0.0318762	Yes	0.484396	No	Down
XP_011100935	CDS_22081_Unigene_36087	CDS_20935_Unigene_33656	probable mediator of RNA polymerase II transcription subunit 26c	56.3688	622.826	11.0491	3.46586	0.0320057	Yes	0.485878	No	Up
XP_011075346	CDS_9100_Unigene_17618	CDS_16965_Unigene_28167	zeatin O-glucosyltransferase-like	292.781	26.1492	0.089313	-3.48499	0.032182	Yes	0.487094	No	Down
XP_011085577	CDS_36220_Unigene_55767	CDS_33086_Unigene_50411	DNA-directed RNA polymerase chloroplastic mitochondrial	333.165	2286.87	6.86406	2.77906	0.0321651	Yes	0.487094	No	Up
XP_011097643	CDS_8554_Unigene_16736	CDS_14397_Unigene_24420	DNA polymerase zeta processivity subunit isoform X1	43.749	496.835	11.3565	3.50545	0.032145	Yes	0.487094	No	Up
XP_011093906	CDS_35599_Unigene_55020	CDS_22218_Unigene_35386	PREDICTED: uncharacterized protein LOC105173735	46.2729	521.795	11.2765	3.49524	0.0323246	Yes	0.488279	No	Up
XP_011101554	CDS_23621_Unigene_38124	CDS_19844_Unigene_32148	probable methionine--tRNA ligase	1063.44	5683.88	5.34483	2.41814	0.0323168	Yes	0.488279	No	Up
XP_011084942	CDS_18911_Unigene_31595	CDS_20699_Unigene_33308	probable signal peptidase complex subunit 2	2635.87	407.69	0.15467	-2.69274	0.0323943	Yes	0.488329	No	Down
XP_011085851	CDS_10145_Unigene_19221	CDS_8151_Unigene_15185	condensin complex subunit 3	762.241	72.5046	0.0951202	-3.3941	0.0324177	Yes	0.488329	No	Down
XP_012828302	CDS_37088_Unigene_56987	CDS_25504_Unigene_39936	potassium transporter 7	1484.94	180.667	0.121666	-3.039	0.0324245	Yes	0.488329	No	Down
XP_011097476	CDS_17736_Unigene_30056	CDS_2137_Unigene_4575	PREDICTED: uncharacterized protein At4g38062	145.549	16.6404	0.114328	-3.12875	0.032606	Yes	0.490577	No	Down
XP_012838234	CDS_20052_Unigene_33191	CDS_23660_Unigene_37409	PREDICTED: nicastrin	2322.06	342.317	0.147419	-2.762	0.0326486	Yes	0.490731	No	Down
XP_011077218	CDS_17496_Unigene_29711	CDS_19490_Unigene_31671	triosephosphate cytosolic	12498.7	2406.91	0.192573	-2.37653	0.0328513	Yes	0.491599	No	Down
XP_012839033	CDS_2964_Unigene_6698	CDS_6402_Unigene_12266	PREDICTED: uncharacterized protein LOC105959470	472.825	41.601	0.0879839	-3.50662	0.0328683	Yes	0.491599	No	Down
XP_011083442	CDS_17920_Unigene_30282	CDS_19667_Unigene_31908	ribonuclease P subunit p25	238.937	1794.79	7.51156	2.90911	0.0328425	Yes	0.491599	No	Up
XP_011100775	CDS_123_Unigene_296	CDS_808_Unigene_1851	ocs element-binding factor 1-like	24.3985	257.926	10.5714	3.4021	0.032846	Yes	0.491599	No	Up
XP_012847738	CDS_11140_Unigene_20661	CDS_2695_Unigene_5563	PREDICTED: uncharacterized protein LOC105967667	1035.67	5521.05	5.33088	2.41437	0.0328264	Yes	0.491599	No	Up
XP_011069559	CDS_37442_Unigene_57436	CDS_7932_Unigene_14817	MORN repeat-containing 1-like	921.252	93.8994	0.101926	-3.29441	0.0330236	Yes	0.492007	No	Down
XP_011085814	CDS_32393_Unigene_50471	CDS_18975_Unigene_30954	potassium transporter 8-like	1323.41	154.518	0.116758	-3.09841	0.0330185	Yes	0.492007	No	Down
XP_011079504	CDS_21223_Unigene_34825	CDS_22293_Unigene_35502	probable phosphatase 2C 49	15.9852	128.369	8.03048	3.00549	0.0330257	Yes	0.492007	No	Up
XP_011081327	CDS_108_Unigene_248	CDS_14463_Unigene_24519	pentatricopeptide repeat-containing mitochondrial	24.3985	256.738	10.5227	3.39543	0.0330576	Yes	0.492007	No	Up
XP_011088202	CDS_23344_Unigene_37717	CDS_19702_Unigene_31959	triacylglycerol lipase 1 isoform X1	296.988	2089.56	7.03583	2.81472	0.0330072	Yes	0.492007	No	Up
XP_011088558	CDS_9777_Unigene_18625	CDS_3252_Unigene_6512	PREDICTED: uncharacterized protein LOC105169752	1363.79	161.65	0.11853	-3.07668	0.0331737	Yes	0.493252	No	Down
XP_011084206	CDS_10488_Unigene_19743	CDS_2518_Unigene_5277	DNA ligase 1-like	106.848	1009.12	9.44442	3.23946	0.0332404	Yes	0.49376	No	Up
XP_011079508	CDS_28672_Unigene_45130	CDS_25568_Unigene_40034	probable boron transporter 2	1252.73	143.821	0.114805	-3.12274	0.0334321	Yes	0.494268	No	Down
XP_011087304	CDS_20240_Unigene_33402	CDS_15967_Unigene_26765	chaperone 1	855.629	85.5792	0.100019	-3.32165	0.0333655	Yes	0.494268	No	Down
XP_012829048	CDS_4651_Unigene_9949	CDS_6730_Unigene_12786	PREDICTED: uncharacterized protein LOC105950245 isoform X2	347.468	30.9036	0.0889395	-3.49103	0.0333864	Yes	0.494268	No	Down
XP_011077855	CDS_35352_Unigene_54705	CDS_31131_Unigene_47804	signal recognition particle 54 kDa chloroplastic	1747.43	9051.19	5.1797	2.37287	0.0334699	Yes	0.494268	No	Up
XP_011090453	CDS_10251_Unigene_19374	CDS_11675_Unigene_20445	ribosome biogenesis TSR3 homolog isoform X1	477.873	2929.9	6.13112	2.61615	0.0333367	Yes	0.494268	No	Up
XP_011100554	CDS_12135_Unigene_22131	CDS_14368_Unigene_24373	PREDICTED: uncharacterized protein LOC105178721	712.603	3968.73	5.56935	2.47751	0.0334379	Yes	0.494268	No	Up
XP_011091330	CDS_1267_Unigene_2761	CDS_11255_Unigene_19804	inactive disease susceptibility LOV1	441.696	39.2238	0.0888026	-3.49325	0.0336405	Yes	0.495609	No	Down
XP_012850396	CDS_5369_Unigene_11267	CDS_2486_Unigene_5222	PREDICTED: uncharacterized protein LOC105970144	14974.8	2926.33	0.195418	-2.35537	0.0336441	Yes	0.495609	No	Down
XP_012856472	CDS_34190_Unigene_53055	CDS_36371_Unigene_57389	uncharacterized methyltransferase -like	21.8745	215.137	9.83505	3.29793	0.0336587	Yes	0.495609	No	Up
XP_011091952	CDS_760_Unigene_1851	CDS_3282_Unigene_6577	ECERIFERUM 1-like	503.954	45.1668	0.0896248	-3.47996	0.033696	Yes	0.49566	No	Down
XP_011072468	CDS_28341_Unigene_44704	CDS_24651_Unigene_38736	PREDICTED: uncharacterized protein At1g51745	302.877	2105.01	6.95004	2.79702	0.0337275	Yes	0.49566	No	Up
XP_011086959	CDS_5816_Unigene_11995	CDS_10256_Unigene_18343	retinol dehydrogenase 11-like	1960.29	274.567	0.140064	-2.83584	0.0339459	Yes	0.497426	No	Down
XP_011081208	CDS_933_Unigene_2196	CDS_35254_Unigene_54850	xyloglucan galactosyltransferase KATAMARI1 homolog	47.1143	518.229	10.9994	3.45936	0.0338902	Yes	0.497426	No	Up
XP_011093904	CDS_35616_Unigene_55035	CDS_1239_Unigene_2741	alpha-aminoadipic semialdehyde synthase	133.771	1181.47	8.83203	3.14275	0.0339139	Yes	0.497426	No	Up
XP_011091283	CDS_39392_Unigene_61443	CDS_1039_Unigene_2273	PREDICTED: uncharacterized protein LOC105171763	47.9556	525.361	10.9552	3.45354	0.034064	Yes	0.498674	No	Up
XP_011094204	CDS_35290_Unigene_54607	CDS_21263_Unigene_34139	PREDICTED: uncharacterized protein LOC105173962	337.372	2266.66	6.71858	2.74816	0.0341142	Yes	0.498928	No	Up
XP_012828367	CDS_8878_Unigene_17256	CDS_8971_Unigene_16504	separase isoform X3	264.176	24.9606	0.0944846	-3.40378	0.0342665	Yes	0.500673	No	Down
XP_011089260	CDS_12369_Unigene_22446	CDS_5143_Unigene_9949	PREDICTED: uncharacterized protein LOC105170275	263.335	24.9606	0.0947864	-3.39918	0.0344216	Yes	0.502457	No	Down
XP_011071110	CDS_17422_Unigene_29623	CDS_35627_Unigene_55582	homeobox knotted-1-like 6	174.155	19.0176	0.1092	-3.19496	0.0344809	Yes	0.502838	No	Down
XP_011084711	CDS_10085_Unigene_19106	CDS_3532_Unigene_7108	brefeldin A-inhibited guanine nucleotide-exchange 5-like	309.608	28.5264	0.0921371	-3.44007	0.0347345	Yes	0.505565	No	Down
XP_012838706	CDS_25217_Unigene_40307	CDS_22920_Unigene_36391	PREDICTED: uncharacterized protein LOC105959206	1357.06	164.027	0.120869	-3.04848	0.0347022	Yes	0.505565	No	Down
XP_011091771	CDS_23665_Unigene_38169	CDS_6561_Unigene_12527	F-box WD-40 repeat-containing At3g52030 isoform X2	58.8928	9.5088	0.161459	-2.63076	0.034907	Yes	0.507104	No	Down
XP_011072040	CDS_22547_Unigene_36682	CDS_23581_Unigene_37307	PREDICTED: uncharacterized protein LOC105157340 isoform X1	116.103	1054.29	9.08063	3.18279	0.034874	Yes	0.507104	No	Up
XP_009397784	CDS_31795_Unigene_49561	CDS_26977_Unigene_41973	translation factor SUI1 homolog 2	822.817	4412.08	5.36217	2.42282	0.0350362	Yes	0.508494	No	Up
XP_011074351	CDS_32545_Unigene_50696	CDS_27277_Unigene_42365	polyadenylation and cleavage factor homolog 4 isoform X2	26.0811	269.812	10.3451	3.37088	0.0350699	Yes	0.508496	No	Up
XP_011074333	CDS_17415_Unigene_29609	CDS_29234_Unigene_45140	growth-regulating factor 6-like	162.376	1337.17	8.23505	3.04178	0.0353379	Yes	0.510966	No	Up
XP_011076392	CDS_33144_Unigene_51580	CDS_30876_Unigene_47446	DNA-directed RNA polymerase III subunit rpc4-like	13.4612	91.5222	6.79895	2.76531	0.035282	Yes	0.510966	No	Up
XP_011096513	CDS_1062_Unigene_2398	CDS_2765_Unigene_5678	probable purine permease 9	691.57	3810.65	5.51014	2.46209	0.0353412	Yes	0.510966	No	Up
XP_011082901	CDS_23278_Unigene_37619	CDS_35_Unigene_96	conserved oligomeric Golgi complex subunit 5-like	1787.82	246.04	0.13762	-2.86123	0.0355746	Yes	0.513852	No	Down
XP_011079564	CDS_19870_Unigene_32952	CDS_5457_Unigene_10598	DNA mismatch repair MSH6	1446.24	181.856	0.125744	-2.99144	0.035617	Yes	0.513976	No	Down
XP_011080282	CDS_32379_Unigene_50458	CDS_28193_Unigene_43668	xanthine dehydrogenase 1-like	2075.55	304.282	0.146603	-2.77002	0.0357368	Yes	0.515214	No	Down
XP_011093912	CDS_18004_Unigene_30406	CDS_21727_Unigene_34748	PREDICTED: uncharacterized protein LOC105173740	1430.25	179.479	0.125487	-2.99439	0.0358193	Yes	0.515534	No	Down
XP_012834903	CDS_20705_Unigene_34060	CDS_15497_Unigene_26091	CDP-diacylglycerol--glycerol-3-phosphate 3-phosphatidyltransferase 2-like	77.402	766.647	9.90474	3.30812	0.0358269	Yes	0.515534	No	Up
XP_011075366	CDS_786_Unigene_1918	CDS_10018_Unigene_18012	DNA repair recA homolog mitochondrial isoform X1	711.762	70.1274	0.0985265	-3.34334	0.0358678	Yes	0.515634	No	Down
XP_011099009	CDS_993_Unigene_2280	CDS_2716_Unigene_5598	threonylcarbamoyladenosine tRNA methylthiotransferase	339.896	2242.89	6.59875	2.72219	0.0359289	Yes	0.516024	No	Up
XP_012843049	CDS_18505_Unigene_31078	CDS_3889_Unigene_7806	peroxisomal nicotinamide adenine dinucleotide carrier-like isoform X1	595.659	3372.06	5.66105	2.50107	0.0360756	Yes	0.51764	No	Up
XP_011099166	CDS_16284_Unigene_28057	CDS_28540_Unigene_44181	PREDICTED: protein COBRA-like	5768.97	1124.42	0.194907	-2.35914	0.0361691	Yes	0.518492	No	Down
XP_011079515	CDS_7275_Unigene_14504	CDS_33_Unigene_94	probable pectinesterase 53	2146.22	320.922	0.149529	-2.74151	0.0362913	Yes	0.518774	No	Down
XP_011074257	CDS_27322_Unigene_43255	CDS_26940_Unigene_41917	PREDICTED: uncharacterized protein LOC105159024	96.7525	905.713	9.36113	3.22668	0.0362847	Yes	0.518774	No	Up
XP_012828449	CDS_5454_Unigene_11397	CDS_36350_Unigene_57348	7-deoxyloganetin glucosyltransferase-like	28.6051	297.15	10.388	3.37685	0.036235	Yes	0.518774	No	Up
XP_011070862	CDS_37555_Unigene_57627	CDS_31149_Unigene_47828	phospholipid-transporting ATPase 9	95.0699	892.638	9.38929	3.23102	0.0363979	Yes	0.519458	No	Up
XP_011088677	CDS_36496_Unigene_56161	CDS_3437_Unigene_6880	probable alanine--tRNA chloroplastic isoform X2	1664.98	8380.82	5.03357	2.33158	0.0364076	Yes	0.519458	No	Up
XP_011070336	CDS_15774_Unigene_27275	CDS_6161_Unigene_11941	dolichyl-diphosphooligosaccharide-- glycosyltransferase subunit DAD1	2009.93	293.584	0.146067	-2.7753	0.0364891	Yes	0.519776	No	Down
XP_011073787	CDS_27617_Unigene_43699	CDS_18034_Unigene_29617	26S proteasome non-ATPase regulatory subunit 1 homolog A-like	2059.57	304.282	0.147741	-2.75886	0.0366308	Yes	0.519776	No	Down
XP_011074295	CDS_13281_Unigene_23707	CDS_17107_Unigene_28383	symplekin-like isoform X1	2007.4	293.584	0.146251	-2.77349	0.0366353	Yes	0.519776	No	Down
XP_011089994	CDS_14657_Unigene_25733	CDS_3367_Unigene_6697	SWI SNF-related matrix-associated actin-dependent regulator of chromatin subfamily A member 3-like 2 isoform X3	541.814	51.1098	0.0943309	-3.40613	0.0364991	Yes	0.519776	No	Down
XP_011084237	CDS_14528_Unigene_25549	CDS_13567_Unigene_23265	UDP-glycosyltransferase 91C1-like	80.7673	785.664	9.72751	3.28207	0.036598	Yes	0.519776	No	Up
XP_012852805	CDS_34262_Unigene_53161	CDS_30470_Unigene_46854	PREDICTED: uncharacterized protein LOC105972398	62.2581	637.089	10.233	3.35516	0.0366234	Yes	0.519776	No	Up
XP_011075626	CDS_29390_Unigene_46123	CDS_4082_Unigene_8083	F-box At2g32560-like	355.881	33.2808	0.0935166	-3.41863	0.0367421	Yes	0.520805	No	Down
XP_011071605	CDS_13204_Unigene_23598	CDS_14037_Unigene_23927	hypersensitive-induced response 1	4639.91	22604.8	4.87181	2.28446	0.0368102	Yes	0.521283	No	Up
XP_011099531	CDS_20963_Unigene_34418	CDS_2956_Unigene_5997	probable serine threonine- kinase At1g18390 isoform X1	480.397	45.1668	0.0940197	-3.41089	0.0370342	Yes	0.522643	No	Down
XP_012857611	CDS_36259_Unigene_55839	CDS_33182_Unigene_50556	cyclin-dependent kinase E-1 isoform X4	326.435	30.9036	0.0946701	-3.40095	0.0370169	Yes	0.522643	No	Down
XP_011098439	CDS_20119_Unigene_33253	CDS_10155_Unigene_18199	PREDICTED: uncharacterized protein LOC105177106	2604.75	12978.3	4.98257	2.31689	0.0370125	Yes	0.522643	No	Up
XP_011100765	CDS_26524_Unigene_42123	CDS_12984_Unigene_22435	psbB mRNA maturation factor chloroplastic	122.834	1074.49	8.74756	3.12888	0.0370783	Yes	0.522643	No	Up
XP_011101761	CDS_13151_Unigene_23525	CDS_9731_Unigene_17591	asparagine synthetase domain-containing 1	51.3209	536.058	10.4452	3.38477	0.0370583	Yes	0.522643	No	Up
XP_011081011	CDS_20909_Unigene_34331	CDS_18773_Unigene_30672	F-box At3g07870-like	1018	114.106	0.112087	-3.1573	0.0372141	Yes	0.523306	No	Down
XP_011100621	CDS_12425_Unigene_22538	CDS_36177_Unigene_57083	thymidine kinase	124.516	1084	8.70571	3.12196	0.037207	Yes	0.523306	No	Up
XP_012837842	CDS_23460_Unigene_37894	CDS_20569_Unigene_33117	HD domain-containing 2	149.756	1239.71	8.27819	3.04932	0.0372288	Yes	0.523306	No	Up
XP_011071998	CDS_12147_Unigene_22151	CDS_11772_Unigene_20617	probable galactinol--sucrose galactosyltransferase 2	869.931	92.7108	0.106573	-3.23009	0.0373045	Yes	0.523401	No	Down
XP_011096577	CDS_2711_Unigene_6256	CDS_3513_Unigene_7052	HEADING DATE 3A-like	30.2877	312.602	10.3211	3.36752	0.0372907	Yes	0.523401	No	Up
XP_011071139	CDS_13458_Unigene_23941	CDS_5169_Unigene_9979	F-box At1g70590	599.024	58.2414	0.0972271	-3.3625	0.0375204	Yes	0.52377	No	Down
XP_011078959	CDS_2931_Unigene_6648	CDS_2188_Unigene_4678	HAUS augmin-like complex subunit 1	708.397	71.316	0.100672	-3.31226	0.0374224	Yes	0.52377	No	Down
XP_011097067	CDS_16509_Unigene_28349	CDS_17484_Unigene_28906	histone deacetylase 15 isoform X5	588.928	57.0528	0.0968756	-3.36772	0.0374736	Yes	0.52377	No	Down
XP_010259597	CDS_15538_Unigene_26937	CDS_5867_Unigene_11509	probable U6 snRNA-associated Sm LSm4 isoform X1	405.519	2512.7	6.19625	2.6314	0.0375378	Yes	0.52377	No	Up
XP_011075522	CDS_15248_Unigene_26488	CDS_17072_Unigene_28323	methyltransferase 7A	154.804	1267.05	8.18485	3.03296	0.0374338	Yes	0.52377	No	Up
XP_011078240	CDS_2424_Unigene_5598	CDS_3012_Unigene_6083	PREDICTED: uncharacterized protein LOC105162036	75.7194	739.309	9.76381	3.28744	0.0374904	Yes	0.52377	No	Up
XP_011077468	CDS_16230_Unigene_27990	CDS_23966_Unigene_37841	notum homolog isoform X1	1598.52	215.137	0.134585	-2.89341	0.0375764	Yes	0.523827	No	Down
XP_011074592	CDS_7327_Unigene_14603	CDS_34086_Unigene_51820	ferruginol synthase- partial	12.6199	79.6362	6.31037	2.65772	0.0376578	Yes	0.52448	No	Up
XP_011074836	CDS_15709_Unigene_27176	CDS_14017_Unigene_23907	kinesin heavy chain	932.189	102.22	0.109655	-3.18895	0.037762	Yes	0.524615	No	Down
XP_011094308	CDS_10008_Unigene_18986	CDS_2981_Unigene_6033	caffeoylshikimate esterase-like	322.228	30.9036	0.095906	-3.38223	0.0378025	Yes	0.524615	No	Down
XP_011072140	CDS_21561_Unigene_35369	CDS_985_Unigene_2192	E3 ubiquitin- ligase BOI-like	156.487	1272.99	8.13482	3.02411	0.037761	Yes	0.524615	No	Up
XP_011081365	CDS_13714_Unigene_24314	CDS_32402_Unigene_49501	ubiquitin carboxyl-terminal hydrolase 9	136.295	1150.56	8.44173	3.07754	0.0379094	Yes	0.524615	No	Up
XP_011082362	CDS_2570_Unigene_5962	CDS_12189_Unigene_21204	metal transporter Nramp1-like isoform X3	21.0332	184.233	8.75917	3.13079	0.0378934	Yes	0.524615	No	Up
XP_011084565	CDS_26859_Unigene_42585	CDS_25608_Unigene_40092	polyadenylate-binding -interacting 12-like	253.239	1787.65	7.05915	2.8195	0.0378249	Yes	0.524615	No	Up
XP_012849888	CDS_10036_Unigene_19026	CDS_31271_Unigene_47992	retrovirus-related Pol poly from transposon TNT 1-94	19.3505	160.461	8.29234	3.05178	0.037898	Yes	0.524615	No	Up
XP_011097891	CDS_6492_Unigene_13081	CDS_14283_Unigene_24275	cytochrome P450 716B1-like isoform X2	18.5092	148.575	8.0271	3.00488	0.0379841	Yes	0.52517	No	Up
XP_011076169	CDS_2903_Unigene_6582	CDS_34560_Unigene_52988	low-temperature-induced 65 kDa	711.762	3814.22	5.35884	2.42192	0.0380368	Yes	0.52542	No	Up
XP_011086746	CDS_14823_Unigene_25942	CDS_83_Unigene_177	ATP-dependent DNA helicase Q-like 5	160.693	19.0176	0.118347	-3.0789	0.0381804	Yes	0.525968	No	Down
XP_011094823	CDS_22590_Unigene_36740	CDS_23294_Unigene_36890	PREDICTED: uncharacterized protein LOC105174419	4729.09	918.788	0.194284	-2.36376	0.0381417	Yes	0.525968	No	Down
XP_011091372	CDS_21693_Unigene_35511	CDS_20483_Unigene_32982	beta-amylase chloroplastic	1659.1	8217.98	4.95329	2.30839	0.0381719	Yes	0.525968	No	Up
XP_011069558	CDS_38921_Unigene_60027	CDS_4674_Unigene_9050	E3 ubiquitin- ligase RING1 isoform X2	347.468	33.2808	0.095781	-3.38412	0.0382605	Yes	0.526593	No	Down
XP_011075540	CDS_11139_Unigene_20660	CDS_6155_Unigene_11931	UDP-N-acetylglucosamine transferase subunit ALG13 homolog	747.098	77.259	0.103412	-3.27352	0.0383411	Yes	0.526747	No	Down
XP_012828310	CDS_6616_Unigene_13297	CDS_8490_Unigene_15716	flavonol synthase flavanone 3-hydroxylase-like	502.272	2916.82	5.80726	2.53786	0.0383161	Yes	0.526747	No	Up
XP_011078404	CDS_1569_Unigene_3481	CDS_1298_Unigene_2894	equilibrative nucleotide transporter 8	143.867	17.829	0.123927	-3.01244	0.0383812	Yes	0.526822	No	Down
XP_011073252	CDS_5202_Unigene_10956	CDS_14709_Unigene_24892	notum homolog isoform X2	2861.35	490.892	0.171559	-2.54322	0.0386591	Yes	0.528434	No	Down
XP_011080945	CDS_9400_Unigene_18095	CDS_10306_Unigene_18417	PREDICTED: uncharacterized protein LOC105164082 isoform X2	1341.92	169.97	0.126662	-2.98094	0.0385975	Yes	0.528434	No	Down
XP_011088241	CDS_4275_Unigene_9310	CDS_3189_Unigene_6387	probable folate-biopterin transporter 7	384.486	36.8466	0.0958334	-3.38333	0.0386942	Yes	0.528434	No	Down
XP_012835078	CDS_23465_Unigene_37902	CDS_840_Unigene_1936	thioredoxin chloroplastic	526.67	51.1098	0.0970433	-3.36523	0.0386695	Yes	0.528434	No	Down
XP_011078577	CDS_16405_Unigene_28221	CDS_14683_Unigene_24852	E3 ubiquitin- ligase RING1-like	239.778	1709.21	7.12829	2.83356	0.038563	Yes	0.528434	No	Up
XP_011091024	CDS_26741_Unigene_42429	CDS_21568_Unigene_34526	WD repeat-containing 43	52.1622	532.493	10.2084	3.35168	0.0387075	Yes	0.528434	No	Up
XP_011085737	CDS_31034_Unigene_48490	CDS_23412_Unigene_37057	PREDICTED: uncharacterized protein LOC105167642 isoform X2	1637.22	225.834	0.137937	-2.85791	0.038765	Yes	0.528744	No	Down
XP_011070158	CDS_29363_Unigene_46100	CDS_28700_Unigene_44392	ECERIFERUM 3-like	1712.94	241.286	0.140861	-2.82766	0.0389382	Yes	0.529111	No	Down
XP_011082290	CDS_1050_Unigene_2364	CDS_16824_Unigene_27943	calcineurin B 7	158.169	19.0176	0.120236	-3.05606	0.0389616	Yes	0.529111	No	Down
XP_011097101	CDS_3920_Unigene_8548	CDS_18001_Unigene_29557	PREDICTED: uncharacterized protein LOC105176096	34.4944	353.014	10.234	3.35529	0.0389299	Yes	0.529111	No	Up
XP_011100820	CDS_22616_Unigene_36768	CDS_24162_Unigene_38073	probable F-actin-capping subunit beta isoform X2	176.678	1372.83	7.77023	2.95796	0.0389669	Yes	0.529111	No	Up
XP_011101033	CDS_17105_Unigene_29205	CDS_25133_Unigene_39444	DNA primase small subunit	136.295	1138.68	8.35452	3.06256	0.0390011	Yes	0.529111	No	Up
XP_012837232	CDS_22941_Unigene_37203	CDS_26482_Unigene_41312	lysine histidine transporter-like 8	2145.38	10557.1	4.92087	2.29891	0.0388864	Yes	0.529111	No	Up
XP_011084973	CDS_5119_Unigene_10825	CDS_3494_Unigene_7010	PREDICTED: uncharacterized protein LOC105167097	65.6234	646.598	9.85316	3.30059	0.0390699	Yes	0.529571	No	Up
XP_011081483	CDS_18770_Unigene_31420	CDS_19151_Unigene_31183	PREDICTED: uncharacterized protein LOC105164530	713.445	73.6932	0.103292	-3.2752	0.0391244	Yes	0.529837	No	Down
XP_011082057	CDS_36277_Unigene_55865	CDS_23318_Unigene_36923	exocyst complex component EXO70A1	1457.18	192.553	0.132141	-2.91985	0.0392585	Yes	0.53118	No	Down
XP_011080525	CDS_11732_Unigene_21518	CDS_1015_Unigene_2237	PREDICTED: uncharacterized protein LOC105163767	95.0699	865.301	9.10174	3.18614	0.0393601	Yes	0.53208	No	Up
XP_011100078	CDS_17514_Unigene_29731	CDS_34838_Unigene_53813	general transcription factor 3C polypeptide 3 isoform X1	99.2765	892.638	8.99144	3.16855	0.0395619	Yes	0.534332	No	Up
XP_011075832	CDS_36608_Unigene_56339	CDS_28514_Unigene_44136	5 -3 exoribonuclease 3-like	642.773	65.373	0.101705	-3.29754	0.0397491	Yes	0.535262	No	Down
XP_011083243	CDS_20552_Unigene_33848	CDS_13672_Unigene_23397	dedicator of cytokinesis 7	3799.43	720.291	0.189579	-2.39913	0.0397708	Yes	0.535262	No	Down
XP_012834247	CDS_39255_Unigene_60923	CDS_2409_Unigene_5085	probable membrane-associated kinase regulator 2	472.825	46.3554	0.0980392	-3.3505	0.0400415	Yes	0.535262	No	Down
XP_011069930	CDS_37470_Unigene_57483	CDS_33707_Unigene_51282	plasma membrane ATPase 4	72.354	694.142	9.59369	3.26209	0.0398877	Yes	0.535262	No	Up
XP_011075382	CDS_15636_Unigene_27072	CDS_10426_Unigene_18585	EARLY RESPONSIVE TO DEHYDRATION 15-like	469.46	2739.72	5.8359	2.54496	0.0400502	Yes	0.535262	No	Up
XP_011075423	CDS_16687_Unigene_28603	CDS_20487_Unigene_32989	histidine--tRNA cytoplasmic isoform X1	600.707	3290.04	5.47695	2.45337	0.0400539	Yes	0.535262	No	Up
XP_011080834	CDS_12246_Unigene_22267	CDS_962_Unigene_2163	mitochondrial arginine transporter BAC2-like	357.564	2252.4	6.29929	2.65519	0.0398775	Yes	0.535262	No	Up
XP_011082119	CDS_26031_Unigene_41411	CDS_4415_Unigene_8617	PREDICTED: uncharacterized protein LOC105164965	1587.58	7763.93	4.89041	2.28996	0.0397118	Yes	0.535262	No	Up
XP_011084667	CDS_21060_Unigene_34570	CDS_30019_Unigene_46221	RNA-binding Luc7-like 1 isoform X2	195.188	1459.6	7.47793	2.90264	0.0400467	Yes	0.535262	No	Up
XP_011097319	CDS_5837_Unigene_12033	CDS_10888_Unigene_19239	PREDICTED: uncharacterized protein LOC105176273	133.771	1112.53	8.31668	3.05601	0.0400135	Yes	0.535262	No	Up
XP_012831588	CDS_5347_Unigene_11235	CDS_9981_Unigene_17954	PREDICTED: uncharacterized protein LOC105952571 isoform X2	4920.92	23274	4.7296	2.24172	0.0400185	Yes	0.535262	No	Up
XP_012856510	CDS_33431_Unigene_52047	CDS_30206_Unigene_46459	ubiquitin carboxyl-terminal hydrolase 6	775.703	4034.11	5.20058	2.37867	0.0398283	Yes	0.535262	No	Up
XP_011077079	CDS_3709_Unigene_8015	CDS_4328_Unigene_8478	PREDICTED: uncharacterized protein LOC105161168 isoform X2	295.305	29.715	0.100625	-3.31295	0.0403326	Yes	0.53741	No	Down
XP_011097256	CDS_19928_Unigene_33029	CDS_23668_Unigene_37422	RING finger 10	385.327	2368.88	6.14771	2.62005	0.0403562	Yes	0.53741	No	Up
XP_011098764	CDS_5625_Unigene_11686	CDS_35362_Unigene_54995	tetratricopeptide repeat 28-like	74.0367	703.651	9.50408	3.24855	0.0403495	Yes	0.53741	No	Up
XP_012855305	CDS_14085_Unigene_24875	CDS_13915_Unigene_23735	PREDICTED: uncharacterized protein LOC105974714	140.501	1150.56	8.18899	3.03368	0.0402847	Yes	0.53741	No	Up
XP_011074030	CDS_13671_Unigene_24246	CDS_11048_Unigene_19475	queuine tRNA-ribosyltransferase subunit QTRTD1-like	201.077	1485.75	7.38896	2.88537	0.0404383	Yes	0.538031	No	Up
XP_011073392	CDS_12839_Unigene_23083	CDS_11847_Unigene_20726	formamidopyrimidine-DNA glycosylase isoform X2	2772.17	479.006	0.172791	-2.5329	0.040481	Yes	0.538127	No	Down
XP_011087740	CDS_19874_Unigene_32956	CDS_5480_Unigene_10644	transcription factor bHLH100	922.093	104.597	0.113434	-3.14007	0.0405816	Yes	0.538522	No	Down
XP_011081828	CDS_18985_Unigene_31708	CDS_22935_Unigene_36415	PREDICTED: uncharacterized protein LOC105164768 isoform X3	132.93	1101.83	8.28884	3.05117	0.0405522	Yes	0.538522	No	Up
XP_006428784	CDS_21747_Unigene_35587	CDS_22548_Unigene_35872	hypothetical protein CICLE_v10012805mg	1509.34	7330.09	4.85649	2.27991	0.0406911	Yes	0.539503	No	Up
XP_011078394	CDS_37425_Unigene_57411	CDS_31519_Unigene_48325	WD repeat-containing 11	1532.05	210.382	0.13732	-2.86438	0.0407334	Yes	0.539593	No	Down
XP_009797679	CDS_6860_Unigene_13736	CDS_9608_Unigene_17418	PREDICTED: uncharacterized protein LOC104244072 isoform X1	360.088	35.658	0.0990259	-3.33605	0.040855	Yes	0.540733	No	Down
XP_012829252	CDS_17541_Unigene_29759	CDS_7651_Unigene_14359	late blight resistance homolog R1A-10	5077.4	1021.01	0.201088	-2.3141	0.0409518	Yes	0.541542	No	Down
XP_011084175	CDS_39937_Unigene_62805	CDS_25729_Unigene_40268	PREDICTED: uncharacterized protein LOC105166496	95.9112	855.792	8.92275	3.15749	0.0411392	Yes	0.543546	No	Up
XP_011076990	CDS_19432_Unigene_32349	CDS_11736_Unigene_20559	pentatricopeptide repeat-containing At5g55840	381.962	38.0352	0.0995785	-3.32802	0.0414748	Yes	0.546553	No	Down
XP_011096553	CDS_34251_Unigene_53152	CDS_32045_Unigene_49012	potassium channel KAT3-like	245.667	26.1492	0.106442	-3.23187	0.0414392	Yes	0.546553	No	Down
XP_011076332	CDS_11261_Unigene_20868	CDS_35398_Unigene_55046	21 kDa	4392.56	20641.2	4.69913	2.23239	0.0414218	Yes	0.546553	No	Up
XP_011078340	CDS_21013_Unigene_34499	CDS_14651_Unigene_24812	ABC transporter G family member 32	3680.8	704.84	0.191491	-2.38465	0.0416981	Yes	0.548325	No	Down
XP_011087506	CDS_24030_Unigene_38671	CDS_3570_Unigene_7204	alkaline neutral invertase CINV2	392.899	39.2238	0.0998317	-3.32436	0.0417176	Yes	0.548325	No	Down
XP_011075411	CDS_23865_Unigene_38445	CDS_19735_Unigene_32007	centromere-associated E isoform X1	37.0183	366.089	9.88939	3.30588	0.0416798	Yes	0.548325	No	Up
XP_011073581	CDS_17663_Unigene_29942	CDS_4790_Unigene_9301	cyclin-dependent kinase G-2-like	683.998	72.5046	0.106001	-3.23785	0.0418269	Yes	0.548811	No	Down
XP_011102309	CDS_23169_Unigene_37488	CDS_14248_Unigene_24224	PREDICTED: cyclin-A1-1	14.3025	90.3336	6.31591	2.65899	0.0417943	Yes	0.548811	No	Up
XP_011092752	CDS_17435_Unigene_29645	CDS_35278_Unigene_54879	PREDICTED: uncharacterized protein LOC105172861	595.659	3225.86	5.41562	2.43713	0.0418683	Yes	0.54888	No	Up
XP_011069352	CDS_15785_Unigene_27298	CDS_16105_Unigene_26951	mediator-associated 2-like isoform X2	673.061	71.316	0.105958	-3.23844	0.0420799	Yes	0.55019	No	Down
XP_011097840	CDS_4945_Unigene_10534	CDS_11756_Unigene_20579	glucan endo-1,3-beta-glucosidase 13	2926.97	524.172	0.179083	-2.4813	0.0421132	Yes	0.55019	No	Down
XP_011073073	CDS_2315_Unigene_5258	CDS_31458_Unigene_48251	acetolactate synthase chloroplastic	157.328	1230.2	7.81934	2.96705	0.0420316	Yes	0.55019	No	Up
XP_011099237	CDS_40012_Unigene_62946	CDS_14372_Unigene_24381	prolyl endopeptidase-like	23.5571	203.251	8.62798	3.10902	0.0421085	Yes	0.55019	No	Up
XP_011086138	CDS_36519_Unigene_56195	CDS_30491_Unigene_46888	equilibrative nucleotide transporter 3-like isoform X1	1464.75	200.873	0.137138	-2.8663	0.0422298	Yes	0.551239	No	Down
XP_011089972	CDS_35770_Unigene_55222	CDS_29553_Unigene_45562	PREDICTED: uncharacterized protein LOC105170763 isoform X2	16.8265	116.483	6.92257	2.79131	0.0423182	Yes	0.551917	No	Up
XP_011084383	CDS_31553_Unigene_49194	CDS_30554_Unigene_46970	leukotriene A-4 hydrolase homolog	2216.89	358.957	0.161919	-2.62666	0.0423911	Yes	0.551921	No	Down
XP_010676254	CDS_12791_Unigene_23025	CDS_18838_Unigene_30757	PREDICTED: uncharacterized protein LOC104892119	10.9372	60.6186	5.5424	2.47051	0.042362	Yes	0.551921	No	Up
XP_011074401	CDS_30146_Unigene_47197	CDS_10014_Unigene_18009	chromosome-associated kinesin KIF4-like	435.807	43.9782	0.100912	-3.30883	0.0424837	Yes	0.552179	No	Down
XP_011072679	CDS_12088_Unigene_22066	CDS_3055_Unigene_6156	ethylene-responsive transcription factor RAP2-12-like	1983.01	9469.57	4.77536	2.25561	0.0424581	Yes	0.552179	No	Up
XP_012856419	CDS_8780_Unigene_17109	CDS_3203_Unigene_6407	calcium-transporting ATPase plasma membrane-type	285.21	29.715	0.104187	-3.26276	0.0425266	Yes	0.552264	No	Down
XP_011075348	CDS_21987_Unigene_35960	CDS_5312_Unigene_10273	zeatin O-glucosyltransferase-like	105.166	15.4518	0.146928	-2.76682	0.0426182	Yes	0.55298	No	Down
XP_011072717	CDS_12154_Unigene_22155	CDS_7379_Unigene_13952	tyrosine-sulfated glycopeptide receptor 1	518.257	53.487	0.103206	-3.27641	0.0433764	Yes	0.557576	No	Down
XP_011089216	CDS_17205_Unigene_29324	CDS_5201_Unigene_10054	PREDICTED: uncharacterized protein LOC105170243	1183.75	150.952	0.127521	-2.9712	0.0432223	Yes	0.557576	No	Down
XP_011093728	CDS_5695_Unigene_11797	CDS_2549_Unigene_5325	PREDICTED: uncharacterized protein LOC105173618 isoform X1	238.937	26.1492	0.10944	-3.19179	0.0430422	Yes	0.557576	No	Down
XP_011098445	CDS_9925_Unigene_18840	CDS_7922_Unigene_14798	cysteine-rich receptor kinase 42	323.069	33.2808	0.103014	-3.27908	0.0431435	Yes	0.557576	No	Down
XP_012840211	CDS_12924_Unigene_23196	CDS_10203_Unigene_18270	C-terminal binding AN	2574.46	444.536	0.172672	-2.5339	0.0431818	Yes	0.557576	No	Down
XP_011077326	CDS_29960_Unigene_46894	CDS_25213_Unigene_39545	TSL-kinase interacting 1	409.726	2424.74	5.91797	2.5651	0.0432137	Yes	0.557576	No	Up
XP_011077633	CDS_3658_Unigene_7931	CDS_4580_Unigene_8912	PREDICTED: uncharacterized protein LOC105161594	77.402	707.217	9.13693	3.19171	0.0433187	Yes	0.557576	No	Up
XP_011091432	CDS_8981_Unigene_17426	CDS_15014_Unigene_25333	myb family transcription factor APL-like isoform X2	293.623	1902.95	6.48093	2.6962	0.0432166	Yes	0.557576	No	Up
XP_011097786	CDS_15422_Unigene_26768	CDS_4789_Unigene_9300	mitochondrial inner membrane protease ATP23	227.999	1587.97	6.9648	2.80008	0.0432468	Yes	0.557576	No	Up
XP_011100245	CDS_12189_Unigene_22188	CDS_14612_Unigene_24754	26S proteasome non-ATPase regulatory subunit 2 homolog A-like	35.3357	339.94	9.62029	3.26608	0.0433727	Yes	0.557576	No	Up
XP_011100573	CDS_3701_Unigene_8008	CDS_33342_Unigene_50799	glucose-6-phosphate 1- chloroplastic	220.427	1549.93	7.03149	2.81383	0.0432755	Yes	0.557576	No	Up
XP_011096169	CDS_40179_Unigene_63652	CDS_522_Unigene_1122	DAG chloroplastic	11086.2	2343.92	0.211428	-2.24176	0.0434688	Yes	0.557819	No	Down
XP_012852119	CDS_18306_Unigene_30815	CDS_7732_Unigene_14487	WD repeat-containing 44	1313.31	174.724	0.133041	-2.91006	0.0434351	Yes	0.557819	No	Down
XP_011096984	CDS_9938_Unigene_18874	CDS_7559_Unigene_14211	AMSH-like ubiquitin thioesterase 1	182.568	1351.44	7.40239	2.88799	0.0436125	Yes	0.55919	No	Up
XP_011084862	CDS_1214_Unigene_2685	CDS_6041_Unigene_11763	PREDICTED: uncharacterized protein LOC105167009	8.41326	41.601	4.94469	2.30588	0.043714	Yes	0.560019	No	Up
XP_011086461	CDS_21852_Unigene_35750	CDS_20183_Unigene_32566	PREDICTED: uncharacterized protein LOC105168193	253.239	1703.26	6.72591	2.74973	0.0438599	Yes	0.561381	No	Up
XP_011092647	CDS_31848_Unigene_49634	CDS_26978_Unigene_41975	bifunctional L-3-cyanoalanine synthase cysteine synthase mitochondrial	1373.89	6528.98	4.7522	2.2486	0.0438963	Yes	0.561381	No	Up
XP_011101087	CDS_37411_Unigene_57397	CDS_25220_Unigene_39554	PREDICTED: uncharacterized protein LOC105179193	273.431	1798.35	6.57698	2.71743	0.0439313	Yes	0.561381	No	Up
XP_011077389	CDS_14674_Unigene_25749	CDS_342_Unigene_704	zinc finger CCCH domain-containing 11-like	996.971	121.237	0.121605	-3.03972	0.0442085	Yes	0.56418	No	Down
XP_011094527	CDS_3719_Unigene_8050	CDS_8256_Unigene_15334	PREDICTED: uncharacterized protein LOC105174198	249.033	27.3378	0.109776	-3.18737	0.0442634	Yes	0.56418	No	Down
XP_011098478	CDS_7472_Unigene_14861	CDS_34325_Unigene_52442	L-aspartate chloroplastic	158.169	20.2062	0.12775	-2.9686	0.0442303	Yes	0.56418	No	Down
XP_011097003	CDS_40278_Unigene_63779	CDS_5695_Unigene_11130	PREDICTED: uncharacterized protein LOC105176028	15.1439	95.088	6.27897	2.65053	0.044299	Yes	0.56418	No	Up
XP_011081146	CDS_24458_Unigene_39278	CDS_7098_Unigene_13449	PREDICTED: uncharacterized protein LOC105164231	479.556	49.9212	0.104099	-3.26397	0.0445599	Yes	0.565706	No	Down
XP_011091519	CDS_22256_Unigene_36333	CDS_18541_Unigene_30347	probable serine threonine- kinase NAK	365.977	38.0352	0.103928	-3.26635	0.0446807	Yes	0.565706	No	Down
XP_011101121	CDS_36330_Unigene_55944	CDS_8545_Unigene_15829	monocopper oxidase SKS1	901.902	106.974	0.118609	-3.07571	0.0447797	Yes	0.565706	No	Down
XP_012831600	CDS_15664_Unigene_27102	CDS_7584_Unigene_14256	pectinesterase pectinesterase inhibitor 22	489.652	51.1098	0.10438	-3.26008	0.0446585	Yes	0.565706	No	Down
XP_012838944	CDS_23507_Unigene_37959	CDS_21619_Unigene_34594	carboxypeptidase D	839.643	97.4652	0.116079	-3.10682	0.0447698	Yes	0.565706	No	Down
XP_011069730	CDS_5483_Unigene_11455	CDS_425_Unigene_931	low-temperature-induced cysteine ase-like	19694.6	84574.8	4.29431	2.10243	0.0448287	Yes	0.565706	No	Up
XP_011069871	CDS_34920_Unigene_54080	CDS_32511_Unigene_49654	PREDICTED: uncharacterized protein LOC105155646 isoform X3	65.6234	607.374	9.25545	3.2103	0.0447992	Yes	0.565706	No	Up
XP_011076482	CDS_5169_Unigene_10900	CDS_10899_Unigene_19258	UPF0496 At3g49070	7.57194	35.658	4.70923	2.23549	0.0448059	Yes	0.565706	No	Up
XP_011078041	CDS_11862_Unigene_21743	CDS_11707_Unigene_20502	pre-mRNA cleavage factor Im 25 kDa subunit 1	329.8	2046.77	6.20609	2.63369	0.0447456	Yes	0.565706	No	Up
XP_011078677	CDS_35570_Unigene_54991	CDS_30879_Unigene_47452	PREDICTED: uncharacterized protein LOC105162376	130.406	1047.16	8.03	3.0054	0.0446334	Yes	0.565706	No	Up
XP_011090350	CDS_15971_Unigene_27559	CDS_11990_Unigene_20944	PREDICTED: uncharacterized protein LOC105171048	339.896	2094.31	6.16163	2.62331	0.0446159	Yes	0.565706	No	Up
XP_011083401	CDS_32922_Unigene_51231	CDS_29678_Unigene_45729	PREDICTED: uncharacterized protein LOC105165931 isoform X2	634.36	68.9388	0.108675	-3.20191	0.0450992	Yes	0.567623	No	Down
XP_011085429	CDS_32457_Unigene_50570	CDS_4197_Unigene_8260	WD repeat-containing 26-like	1801.28	276.944	0.153748	-2.70136	0.0450592	Yes	0.567623	No	Down
XP_011084694	CDS_27987_Unigene_44212	CDS_19723_Unigene_31989	PREDICTED: uncharacterized protein LOC105166884 isoform X1	211.173	1482.18	7.01882	2.81123	0.0451084	Yes	0.567623	No	Up
XP_011093454	CDS_12628_Unigene_22825	CDS_13466_Unigene_23143	mitochondrial ribosome-associated GTPase 1	75.7194	682.256	9.01033	3.17158	0.0451302	Yes	0.567623	No	Up
XP_011075959	CDS_2083_Unigene_4708	CDS_10860_Unigene_19208	KH domain-containing At4g18375	149.756	1155.32	7.71467	2.94761	0.0452207	Yes	0.568291	No	Up
XP_012839832	CDS_26726_Unigene_42407	CDS_21806_Unigene_34843	NRT1 PTR FAMILY -like	868.249	4258.75	4.90499	2.29425	0.0453551	Yes	0.569509	No	Up
XP_011083685	CDS_4307_Unigene_9348	CDS_4454_Unigene_8673	probable methyltransferase PMT28 isoform X1	121.992	988.915	8.10637	3.01906	0.0454042	Yes	0.569654	No	Up
XP_011069877	CDS_12826_Unigene_23070	CDS_16265_Unigene_27167	zinc finger CONSTANS-LIKE 5-like	1540.47	7199.35	4.67348	2.2245	0.0454762	Yes	0.570086	No	Up
XP_011070281	CDS_20333_Unigene_33540	CDS_11751_Unigene_20575	poly(U)-specific endoribonuclease-B	3303.05	635.901	0.19252	-2.37692	0.0456951	Yes	0.572357	No	Down
XP_011086992	CDS_32728_Unigene_50987	CDS_23718_Unigene_37490	alpha beta hydrolase domain-containing 17B-like	775.703	89.145	0.114922	-3.12128	0.0458058	Yes	0.572799	No	Down
XP_011074751	CDS_36539_Unigene_56227	CDS_28908_Unigene_44696	cellulose synthase A catalytic subunit 2 [UDP-forming]-like	329.8	2031.32	6.15924	2.62275	0.0458	Yes	0.572799	No	Up
XP_011074720	CDS_10113_Unigene_19163	CDS_17433_Unigene_28836	PREDICTED: plastocyanin-like	7333.84	32762.6	4.46731	2.15941	0.0458774	Yes	0.573222	No	Up
XP_011071514	CDS_969_Unigene_2245	CDS_11611_Unigene_20367	phosphomethylpyrimidine chloroplastic isoform X2	16024.7	69465.3	4.33488	2.11599	0.0464031	Yes	0.579223	No	Up
XP_011079565	CDS_17208_Unigene_29330	CDS_16329_Unigene_27243	universal stress A	10593.1	46999.6	4.4368	2.14952	0.0464936	Yes	0.579223	No	Up
XP_011084309	CDS_11753_Unigene_21573	CDS_20121_Unigene_32487	thioredoxin-like 3- chloroplastic isoform X3	202.76	1425.13	7.02867	2.81325	0.0464528	Yes	0.579223	No	Up
XP_011094385	CDS_25740_Unigene_40988	CDS_25036_Unigene_39288	PREDICTED: uncharacterized protein LOC105174095 isoform X1	723.54	3633.55	5.0219	2.32823	0.046525	Yes	0.579223	No	Up
XP_011096395	CDS_36047_Unigene_55554	CDS_15713_Unigene_26400	phosphoinositide phosphatase SAC1 isoform X4	156.487	1180.28	7.54237	2.91502	0.0465759	Yes	0.579223	No	Up
XP_011098066	CDS_21475_Unigene_35236	CDS_22707_Unigene_36088	transcription elongation factor B polypeptide 3	59.7342	549.133	9.19295	3.20053	0.0465866	Yes	0.579223	No	Up
XP_012849153	CDS_26669_Unigene_42320	CDS_26341_Unigene_41118	metal tolerance 9-like	74.878	665.616	8.88934	3.15208	0.0467201	Yes	0.580408	No	Up
XP_011076603	CDS_8666_Unigene_16909	CDS_6933_Unigene_13167	adenine guanine permease AZG1	224.634	26.1492	0.116408	-3.10274	0.046795	Yes	0.580863	No	Down
XP_011072889	CDS_31894_Unigene_49702	CDS_30408_Unigene_46771	replication A 70 kDa DNA-binding subunit B	2036.85	335.185	0.16456	-2.60331	0.0471914	Yes	0.581669	No	Down
XP_011072906	CDS_20632_Unigene_33950	CDS_14385_Unigene_24392	uncharacterized mitochondrial carrier YMR166C isoform X1	487.128	52.2984	0.107361	-3.21946	0.0470162	Yes	0.581669	No	Down
XP_011075995	CDS_26885_Unigene_42619	CDS_2484_Unigene_5220	PREDICTED: uncharacterized protein LOC105160363	279.32	30.9036	0.110639	-3.17607	0.0472031	Yes	0.581669	No	Down
XP_011078962	CDS_21489_Unigene_35256	CDS_683_Unigene_1559	PREDICTED: uncharacterized protein LOC105162592	343.261	36.8466	0.107343	-3.2197	0.047021	Yes	0.581669	No	Down
XP_011094293	CDS_10876_Unigene_20300	CDS_26046_Unigene_40705	transcription initiation factor TFIID subunit 2 isoform X2	1790.34	280.51	0.156679	-2.67411	0.0471872	Yes	0.581669	No	Down
XP_012829629	CDS_14745_Unigene_25836	CDS_8802_Unigene_16230	pathogen-related -like	1065.12	136.689	0.128332	-2.96205	0.0470742	Yes	0.581669	No	Down
XP_012833515	CDS_5599_Unigene_11634	CDS_7776_Unigene_14559	pentatricopeptide repeat-containing mitochondrial	110.214	16.6404	0.150983	-2.72754	0.0471606	Yes	0.581669	No	Down
XP_011082609	CDS_21358_Unigene_35025	CDS_20476_Unigene_32974	magnesium transporter MRS2-I-like	346.626	2085.99	6.01799	2.58928	0.0472048	Yes	0.581669	No	Up
XP_012838579	CDS_25768_Unigene_41026	CDS_22957_Unigene_36447	aspartic ase 2	251.557	1654.53	6.57717	2.71747	0.0471556	Yes	0.581669	No	Up
XP_011095499	CDS_29796_Unigene_46656	CDS_32264_Unigene_49317	heterogeneous nuclear ribonucleo 1	1292.28	178.29	0.137966	-2.85762	0.0473397	Yes	0.581727	No	Down
XP_011093299	CDS_19958_Unigene_33070	CDS_19831_Unigene_32134	PREDICTED: uncharacterized protein LOC105173304	958.27	4577.3	4.77662	2.25599	0.0473628	Yes	0.581727	No	Up
XP_011096774	CDS_26687_Unigene_42356	CDS_24834_Unigene_38990	E3 ubiquitin- ligase LIN	549.386	2923.96	5.32222	2.41203	0.047354	Yes	0.581727	No	Up
XP_012836538	CDS_1076_Unigene_2425	CDS_19484_Unigene_31661	PREDICTED: uncharacterized protein LOC105957157	200.236	1403.74	7.01042	2.8095	0.0472744	Yes	0.581727	No	Up
XP_009759930	CDS_30070_Unigene_47072	CDS_6462_Unigene_12363	probable receptor kinase At1g67000	341.578	36.8466	0.107872	-3.21261	0.0474078	Yes	0.581809	No	Down
XP_012834379	CDS_12810_Unigene_23046	CDS_12687_Unigene_21979	TBCC domain-containing 1-like	672.22	76.0704	0.113163	-3.14353	0.0474969	Yes	0.581962	No	Down
XP_011094798	CDS_30874_Unigene_48265	CDS_17337_Unigene_28687	PREDICTED: uncharacterized protein LOC105174401 isoform X1	48.7969	450.479	9.23172	3.2066	0.0474665	Yes	0.581962	No	Up
XP_011093414	CDS_22765_Unigene_36954	CDS_560_Unigene_1233	PREDICTED: uncharacterized protein LOC105173395 isoform X1	277.638	30.9036	0.111309	-3.16736	0.0476315	Yes	0.582206	No	Down
XP_012828944	CDS_22733_Unigene_36923	CDS_22743_Unigene_36144	probable pectate lyase 8	901.06	110.54	0.122677	-3.02706	0.0477614	Yes	0.582206	No	Down
XP_012851258	CDS_20217_Unigene_33376	CDS_21457_Unigene_34389	organic cation carnitine transporter 7-like	729.43	84.3906	0.115694	-3.11162	0.0477614	Yes	0.582206	No	Down
XP_011073561	CDS_39010_Unigene_60467	CDS_1038_Unigene_2272	PREDICTED: uncharacterized protein LOC105158475	28.6051	246.04	8.60127	3.10455	0.0477733	Yes	0.582206	No	Up
XP_011076205	CDS_30697_Unigene_48004	CDS_27972_Unigene_43352	E3 ubiquitin- ligase XBAT33	60.5755	549.133	9.06527	3.18035	0.0477853	Yes	0.582206	No	Up
XP_011089292	CDS_33932_Unigene_52751	CDS_31802_Unigene_48709	serine threonine- phosphatase 6 regulatory subunit 3-like isoform X1	245.667	1620.06	6.59454	2.72127	0.0477252	Yes	0.582206	No	Up
XP_015158719	CDS_24047_Unigene_38708	CDS_30071_Unigene_46289	G-type lectin S-receptor-like serine threonine- kinase At4g27290	28.6051	246.04	8.60127	3.10455	0.0477733	Yes	0.582206	No	Up
XP_011095619	CDS_26428_Unigene_41982	CDS_9210_Unigene_16827	probable amino acid permease 7	634.36	71.316	0.112422	-3.153	0.0479687	Yes	0.583918	No	Down
XP_011081653	CDS_13972_Unigene_24696	CDS_29513_Unigene_45515	peptidyl-prolyl cis-trans isomerase CYP57	91.7045	774.967	8.45069	3.07907	0.0480028	Yes	0.583918	No	Up
XP_011091182	CDS_18924_Unigene_31618	CDS_17720_Unigene_29197	PREDICTED: uncharacterized protein LOC105171688	1607.77	243.663	0.151553	-2.72211	0.0481126	Yes	0.584785	No	Down
XP_011089090	CDS_37169_Unigene_57087	CDS_32931_Unigene_50221	PREDICTED: LOW QUALITY PROTEIN: uncharacterized protein LOC105170153	684.839	78.4476	0.114549	-3.12596	0.0481997	Yes	0.585315	No	Down
XP_011094175	CDS_27939_Unigene_44160	CDS_20422_Unigene_32901	lysosomal beta glucosidase-like	1600.2	7320.59	4.57479	2.1937	0.0482332	Yes	0.585315	No	Up
XP_011069713	CDS_5570_Unigene_11590	CDS_12124_Unigene_21126	probable carbohydrate esterase At4g34215	287.734	32.0922	0.111534	-3.16444	0.0484021	Yes	0.586894	No	Down
XP_011069891	CDS_22997_Unigene_37286	CDS_19343_Unigene_31457	FGGY carbohydrate kinase domain-containing isoform X1	434.966	2443.76	5.61829	2.49013	0.0484463	Yes	0.586962	No	Up
XP_011071759	CDS_2512_Unigene_5845	CDS_4413_Unigene_8615	HIPL1 -like	488.81	53.487	0.109423	-3.19202	0.0486307	Yes	0.587834	No	Down
XP_011080157	CDS_33765_Unigene_52515	CDS_30972_Unigene_47583	26S proteasome regulatory subunit 4 homolog A	14240.3	3153.36	0.221439	-2.17502	0.0486087	Yes	0.587834	No	Down
XP_011097016	CDS_22521_Unigene_36659	CDS_25948_Unigene_40555	uncharacterized membrane At4g09580	60.5755	544.379	8.98678	3.1678	0.0486345	Yes	0.587834	No	Up
XP_012831684	CDS_10735_Unigene_20072	CDS_11600_Unigene_20345	OTU domain-containing At3g57810-like isoform X2	23.5571	181.856	7.71978	2.94856	0.0487271	Yes	0.588485	No	Up
XP_011076687	CDS_13010_Unigene_23325	CDS_15423_Unigene_25958	GDSL esterase lipase CPRD49-like	115.262	919.976	7.98163	2.99668	0.0488054	Yes	0.588963	No	Up
XP_011082667	CDS_9210_Unigene_17789	CDS_12906_Unigene_22322	E3 ubiquitin- ligase RMA1H1-like	301.195	1860.16	6.17593	2.62666	0.0489671	Yes	0.590444	No	Up
XP_012846185	CDS_4984_Unigene_10605	CDS_20234_Unigene_32641	anaphase-promoting complex subunit 4	345.785	38.0352	0.109997	-3.18447	0.0492011	Yes	0.592795	No	Down
XP_012852074	CDS_3414_Unigene_7509	CDS_3243_Unigene_6493	pentatricopeptide repeat-containing At3g02330	173.313	22.5834	0.130304	-2.94005	0.0493446	Yes	0.594053	No	Down
XP_011076978	CDS_10568_Unigene_19834	CDS_8758_Unigene_16150	PREDICTED: uncharacterized protein LOC105161098 isoform X1	281.003	1763.88	6.27709	2.6501	0.049396	Yes	0.5942	No	Up
XP_011086186	CDS_26583_Unigene_42199	CDS_25625_Unigene_40122	calcium-dependent kinase-like	3621.91	739.309	0.204121	-2.2925	0.0497147	Yes	0.596774	No	Down
XP_011085358	CDS_20367_Unigene_33590	CDS_23799_Unigene_37603	pentatricopeptide repeat-containing At1g73710	245.667	1597.48	6.50261	2.70102	0.0497279	Yes	0.596774	No	Up
XP_011100464	CDS_3219_Unigene_7155	CDS_7709_Unigene_14457	ATPase WRNIP1	46.2729	417.199	9.01604	3.17249	0.0496772	Yes	0.596774	No	Up
XP_011084289	CDS_7288_Unigene_14531	CDS_7526_Unigene_14163	PREDICTED: uncharacterized protein LOC105166586	3829.72	792.796	0.207012	-2.27222	0.0498446	Yes	0.597702	No	Down
XP_012834762	CDS_40337_Unigene_63872	CDS_1431_Unigene_3315	PREDICTED: uncharacterized protein LOC105955557	84.1326	14.2632	0.169532	-2.56037	0.0500242	No	0.59891	No	Down
XP_012851188	CDS_5853_Unigene_12054	CDS_10942_Unigene_19335	PREDICTED: uncharacterized protein LOC105970915	40.3837	361.334	8.94754	3.16149	0.0499976	Yes	0.59891	No	Up
XP_011080098	CDS_34487_Unigene_53489	CDS_28337_Unigene_43875	PHR1-LIKE 1 isoform X1	566.212	2939.41	5.19135	2.37611	0.0500869	No	0.599188	No	Up
XP_012847703	CDS_27477_Unigene_43491	CDS_20148_Unigene_32532	anaphase-promoting complex subunit 2	713.445	84.3906	0.118286	-3.07965	0.0502354	No	0.600491	No	Down
XP_011077431	CDS_4115_Unigene_8984	CDS_4672_Unigene_9047	PREDICTED: uncharacterized protein LOC105161437 isoform X2	212.856	26.1492	0.12285	-3.02504	0.050309	No	0.600898	No	Down
XP_011082029	CDS_6899_Unigene_13778	CDS_1211_Unigene_2683	histidine kinase 5-like	105.166	16.6404	0.15823	-2.6599	0.0504425	No	0.601546	No	Down
XP_011092597	CDS_26339_Unigene_41849	CDS_22966_Unigene_36455	bifunctional pinoresinol-lariciresinol reductase-like	2751.14	519.418	0.188801	-2.40506	0.0504379	No	0.601546	No	Down
XP_011087900	CDS_15754_Unigene_27245	CDS_15422_Unigene_25957	OBERON 4	477.873	2584.02	5.40732	2.43492	0.0505365	No	0.602194	No	Up
XP_012848867	CDS_30819_Unigene_48184	CDS_18987_Unigene_30974	FRIGIDA-ESSENTIAL 1 isoform X1	719.334	85.5792	0.11897	-3.07133	0.0505861	No	0.602312	No	Down
XP_011082789	CDS_33785_Unigene_52548	CDS_719_Unigene_1641	probable leucine-rich repeat receptor-like serine threonine- kinase At3g14840	1414.27	209.194	0.147916	-2.75715	0.0507874	No	0.604235	No	Down
XP_012842987	CDS_39546_Unigene_61781	CDS_6632_Unigene_12604	60S ribosomal L27	7757.03	1730.6	0.223101	-2.16423	0.0508916	No	0.605	No	Down
XP_011076844	CDS_10093_Unigene_19115	CDS_2601_Unigene_5418	cationic amino acid transporter chloroplastic	53.0035	469.497	8.85784	3.14695	0.0509886	No	0.605679	No	Up
XP_011074905	CDS_19557_Unigene_32527	CDS_768_Unigene_1761	PREDICTED: uncharacterized protein LOC105159516	435.807	48.7326	0.111822	-3.16073	0.0511032	No	0.606566	No	Down
XP_011093224	CDS_35929_Unigene_55434	CDS_30515_Unigene_46908	PREDICTED: nucleolin	172.472	1224.26	7.0983	2.82747	0.0511627	No	0.606798	No	Up
XP_011075577	CDS_32230_Unigene_50247	CDS_28678_Unigene_44358	probable leucine-rich repeat receptor kinase At1g35710	3813.73	797.55	0.209126	-2.25756	0.051296	No	0.607622	No	Down
XP_011077723	CDS_35009_Unigene_54211	CDS_32924_Unigene_50209	subtilisin-like protease	524.987	2756.36	5.25034	2.39241	0.0513555	No	0.607622	No	Up
XP_011080918	CDS_2894_Unigene_6567	CDS_7577_Unigene_14245	mitogen-activated kinase homolog MMK2-like	355.881	2068.16	5.81139	2.53888	0.0513902	No	0.607622	No	Up
XP_011090823	CDS_22727_Unigene_36917	CDS_979_Unigene_2184	glutamine synthetase leaf chloroplastic	10739.5	46058.2	4.28867	2.10053	0.0513923	No	0.607622	No	Up
XP_011074010	CDS_23436_Unigene_37871	CDS_26050_Unigene_40710	la-related 6B-like	169.107	1204.05	7.12008	2.83189	0.0514592	No	0.607939	No	Up
XP_011094091	CDS_33192_Unigene_51656	CDS_24185_Unigene_38114	PREDICTED: uncharacterized protein LOC105173886	236.413	28.5264	0.120664	-3.05094	0.0515755	No	0.608797	No	Down
XP_011093071	CDS_11009_Unigene_20479	CDS_12026_Unigene_20997	BAG family molecular chaperone regulator 6	66.4648	574.094	8.63756	3.11062	0.051612	No	0.608797	No	Up
XP_011073291	CDS_35749_Unigene_55198	CDS_31709_Unigene_48556	glycine--tRNA ligase mitochondrial-like	2450.78	10911.3	4.45219	2.15451	0.0516776	No	0.609098	No	Up
XP_011095615	CDS_17289_Unigene_29433	CDS_17155_Unigene_28439	probable amino acid permease 7	194.346	24.9606	0.128434	-2.96091	0.0518463	No	0.610612	No	Down
XP_011076282	CDS_25405_Unigene_40579	CDS_1716_Unigene_3765	65-kDa microtubule-associated 3	1166.92	162.838	0.139545	-2.84119	0.0521646	No	0.613884	No	Down
XP_011097924	CDS_9462_Unigene_18195	CDS_19419_Unigene_31563	PREDICTED: uncharacterized protein LOC105176724	1203.94	169.97	0.141178	-2.82441	0.0522188	No	0.614046	No	Down
XP_011071894	CDS_20233_Unigene_33394	CDS_7238_Unigene_13709	vacuolar sorting-associated 18 homolog	738.684	90.3336	0.12229	-3.03162	0.0525741	No	0.616707	No	Down
XP_011098666	CDS_33531_Unigene_52161	CDS_25334_Unigene_39702	ARF guanine-nucleotide exchange factor GNOM-like	746.256	91.5222	0.122642	-3.02748	0.0526076	No	0.616707	No	Down
XP_011089390	CDS_36614_Unigene_56346	CDS_30270_Unigene_46572	PREDICTED: uncharacterized protein LOC105170357	235.571	1520.22	6.45333	2.69004	0.0525804	No	0.616707	No	Up
XP_011093451	CDS_20046_Unigene_33185	CDS_21070_Unigene_33837	uric acid degradation bifunctional TTL isoform X1	597.342	3014.29	5.04617	2.33519	0.0525993	No	0.616707	No	Up
XP_011085074	CDS_5818_Unigene_12000	CDS_660_Unigene_1491	NRT1 PTR FAMILY -like	8.41326	38.0352	4.52086	2.1766	0.052704	No	0.61736	No	Up
XP_010549226	CDS_25765_Unigene_41020	CDS_16344_Unigene_27255	basic blue -like	2384.32	436.216	0.182952	-2.45046	0.052769	No	0.617402	No	Down
XP_011077566	CDS_12282_Unigene_22316	CDS_1019_Unigene_2246	vacuolar cation proton exchanger 3-like	2241.29	9912.92	4.42286	2.14498	0.0527889	No	0.617402	No	Up
XP_011092328	CDS_6029_Unigene_12341	CDS_2835_Unigene_5805	uncharacterized zinc finger At4g06634	370.183	2103.82	5.68319	2.5067	0.0532915	No	0.622801	No	Up
XP_011072610	CDS_37911_Unigene_58077	CDS_5644_Unigene_11018	chromatin modification-related eaf-1 isoform X2	1506.82	234.154	0.155397	-2.68597	0.0534302	No	0.623942	No	Down
XP_011090410	CDS_39256_Unigene_60924	CDS_34787_Unigene_53619	F-box At5g07610-like	124.516	19.0176	0.152732	-2.71093	0.0535083	No	0.624373	No	Down
XP_011074408	CDS_11151_Unigene_20689	CDS_9841_Unigene_17756	PREDICTED: cyclin-D3-3-like	192.664	1305.08	6.77389	2.75998	0.053591	No	0.624857	No	Up
XP_012858540	CDS_17679_Unigene_29969	CDS_15434_Unigene_25980	PREDICTED: uncharacterized protein LOC105977725 isoform X2	731.954	90.3336	0.123414	-3.01842	0.0536794	No	0.625404	No	Down
XP_011087406	CDS_33341_Unigene_51918	CDS_30766_Unigene_47276	acyl- -binding domain-containing 4-like	1361.27	6044.03	4.44001	2.15056	0.0537203	No	0.625404	No	Up
XP_011100048	CDS_24383_Unigene_39176	CDS_315_Unigene_670	F-box FBW2	709.238	3418.41	4.81984	2.26899	0.0537618	No	0.625408	No	Up
XP_011069923	CDS_17863_Unigene_30214	CDS_12074_Unigene_21065	VIN3 2	413.091	47.544	0.115093	-3.11913	0.0539087	No	0.626637	No	Down
XP_012843060	CDS_18817_Unigene_31489	CDS_34744_Unigene_53410	PREDICTED: uncharacterized protein LOC105963219	201.918	26.1492	0.129504	-2.94893	0.0539926	No	0.627132	No	Down
XP_011075783	CDS_5314_Unigene_11184	CDS_36294_Unigene_57242	pentatricopeptide repeat-containing chloroplastic	227.999	28.5264	0.125116	-2.99866	0.0542054	No	0.627682	No	Down
XP_011079533	CDS_13592_Unigene_24152	CDS_17821_Unigene_29321	stachyose synthase	782.433	3689.41	4.71531	2.23735	0.054158	No	0.627682	No	Up
XP_011081682	CDS_12099_Unigene_22086	CDS_9613_Unigene_17422	auxin-responsive IAA14	21.0332	140.255	6.66827	2.73731	0.0541929	No	0.627682	No	Up
XP_011101273	CDS_26622_Unigene_42266	CDS_28642_Unigene_44319	serine threonine- kinase AFC2 isoform X1	892.647	4117.31	4.61247	2.20554	0.0541699	No	0.627682	No	Up
XP_011075760	CDS_38181_Unigene_58483	CDS_32971_Unigene_50276	PREDICTED: uncharacterized protein LOC105160191	1557.29	247.229	0.158755	-2.65512	0.0543984	No	0.627987	No	Down
XP_011075665	CDS_35809_Unigene_55266	CDS_27009_Unigene_42016	PREDICTED: uncharacterized protein LOC105160095 isoform X2	17.6678	105.785	5.98745	2.58194	0.0543225	No	0.627987	No	Up
XP_011077685	CDS_1612_Unigene_3647	CDS_2771_Unigene_5687	spermidine hydroxycinnamoyl transferase-like	32.8117	269.812	8.22304	3.03967	0.0543132	No	0.627987	No	Up
XP_011083110	CDS_27122_Unigene_42939	CDS_26506_Unigene_41354	sterol 3-beta-glucosyltransferase UGT80A2-like isoform X1	196.029	1314.59	6.70611	2.74548	0.0543845	No	0.627987	No	Up
XP_011085482	CDS_24983_Unigene_40027	CDS_8912_Unigene_16407	PREDICTED: uncharacterized protein LOC105167449 isoform X2	94.2285	750.006	7.95944	2.99267	0.0544385	No	0.627987	No	Up
XP_011074717	CDS_33798_Unigene_52559	CDS_32099_Unigene_49096	probable prolyl 4-hydroxylase 3	1088.68	152.141	0.139748	-2.8391	0.0547556	No	0.631165	No	Down
XP_011080366	CDS_14459_Unigene_25437	CDS_3863_Unigene_7765	zinc finger CCCH domain-containing 22-like	122.834	921.165	7.49929	2.90675	0.0548695	No	0.631999	No	Up
XP_006421924	CDS_31166_Unigene_48658	CDS_29875_Unigene_46002	hypothetical protein CICLE_v10004755mg	17765.4	4147.02	0.233432	-2.09893	0.0549921	No	0.632082	No	Down
XP_011084458	CDS_1601_Unigene_3609	CDS_34292_Unigene_52263	beta-carotene hydroxylase chloroplastic isoform X1	264.176	32.0922	0.12148	-3.04121	0.054985	No	0.632082	No	Down
XP_011077210	CDS_16868_Unigene_28853	CDS_10792_Unigene_19093	40S ribosomal S11-like	2421.34	10547.6	4.35612	2.12304	0.0550017	No	0.632082	No	Up
XP_011073557	CDS_30911_Unigene_48321	CDS_28267_Unigene_43763	PREDICTED: uncharacterized protein LOC105158471, partial	1240.11	181.856	0.146644	-2.76961	0.0551021	No	0.632757	No	Down
XP_011070964	CDS_28349_Unigene_44718	CDS_311_Unigene_661	PREDICTED: uncharacterized protein LOC105156510	250.715	30.9036	0.123262	-3.0202	0.0552646	No	0.632876	No	Down
XP_011082154	CDS_24261_Unigene_39005	CDS_1223_Unigene_2706	PREDICTED: uncharacterized protein LOC105164987	333.165	39.2238	0.117731	-3.08644	0.0553209	No	0.632876	No	Down
XP_011082298	CDS_25394_Unigene_40566	CDS_6331_Unigene_12168	F-box SKIP8 isoform X1	558.641	66.5616	0.119149	-3.06916	0.0552971	No	0.632876	No	Down
XP_011085545	CDS_28087_Unigene_44349	CDS_13825_Unigene_23620	PREDICTED: uncharacterized protein LOC105167487	752.987	95.088	0.126281	-2.98529	0.0552712	No	0.632876	No	Down
XP_011089218	CDS_1636_Unigene_3747	CDS_3103_Unigene_6238	cysteine-rich repeat secretory 55-like	17.6678	104.597	5.92018	2.56564	0.055236	No	0.632876	No	Up
XP_012831455	CDS_13220_Unigene_23625	CDS_16310_Unigene_27218	TRIGALACTOSYLDIACYLGLYCEROL chloroplastic	2547.54	487.326	0.191293	-2.38614	0.0553994	No	0.633297	No	Down
XP_011088612	CDS_4159_Unigene_9084	CDS_8736_Unigene_16122	heavy metal-associated isoprenylated plant 26-like	1516.91	6624.07	4.36681	2.12658	0.0554753	No	0.633688	No	Up
XP_011078550	CDS_33772_Unigene_52529	CDS_33300_Unigene_50717	probable flavin-containing monooxygenase 1	673.902	83.202	0.123463	-3.01785	0.0555814	No	0.634422	No	Down
XP_011090445	CDS_10301_Unigene_19451	CDS_1405_Unigene_3235	cellulose synthase A catalytic subunit 2 [UDP-forming]	758.035	96.2766	0.127008	-2.97701	0.055684	No	0.634639	No	Down
XP_011093357	CDS_29338_Unigene_46068	CDS_25470_Unigene_39898	common plant regulatory factor 1-like isoform X2	209.49	1368.08	6.53051	2.7072	0.0556749	No	0.634639	No	Up
XP_011091509	CDS_35609_Unigene_55025	CDS_29462_Unigene_45427	phosphatase 2C 37-like	39.5423	330.431	8.35638	3.06288	0.055881	No	0.636406	No	Up
XP_012846956	CDS_30561_Unigene_47791	CDS_28434_Unigene_44034	tetratricopeptide repeat 5-like	84.9739	681.068	8.01502	3.00271	0.0559418	No	0.636621	No	Up
XP_011088249	CDS_18416_Unigene_30953	CDS_19957_Unigene_32282	methylcrotonoyl- carboxylase beta mitochondrial	2017.5	357.769	0.177333	-2.49547	0.0561126	No	0.638087	No	Down
XP_011088032	CDS_11678_Unigene_21439	CDS_3059_Unigene_6164	serine threonine- kinase TOR	553.593	66.5616	0.120236	-3.05606	0.0563188	No	0.639952	No	Down
XP_011082117	CDS_16611_Unigene_28484	CDS_6301_Unigene_12130	glucan endo-1,3-beta-glucosidase 5	644.456	79.6362	0.123571	-3.01659	0.0565879	No	0.640821	No	Down
XP_011090097	CDS_15139_Unigene_26324	CDS_5989_Unigene_11682	helicase MOM1	246.509	30.9036	0.125365	-2.99579	0.0566063	No	0.640821	No	Down
XP_011090858	CDS_14995_Unigene_26154	CDS_4625_Unigene_8988	PREDICTED: uncharacterized protein LOC105171438 isoform X2	156.487	22.5834	0.144315	-2.79271	0.0564961	No	0.640821	No	Down
XP_011094690	CDS_39746_Unigene_62313	CDS_73_Unigene_146	peroxidase 21	306.243	36.8466	0.120318	-3.05507	0.0565867	No	0.640821	No	Down
XP_011091810	CDS_36364_Unigene_55963	CDS_32064_Unigene_49040	PREDICTED: uncharacterized protein F52H3.2	102.642	790.419	7.70075	2.945	0.0564689	No	0.640821	No	Up
XP_011099659	CDS_34637_Unigene_53717	CDS_30761_Unigene_47268	ferrochelatase- chloroplastic	1500.93	240.097	0.159966	-2.64416	0.0568721	No	0.640962	No	Down
XP_011071214	CDS_17114_Unigene_29213	CDS_22083_Unigene_35208	F-box kelch-repeat At1g67480-like	42.9076	357.769	8.33811	3.05972	0.0567652	No	0.640962	No	Up
XP_011078811	CDS_31982_Unigene_49845	CDS_28041_Unigene_43446	carbon catabolite repressor 4 homolog 1-like	752.987	3525.39	4.68187	2.22708	0.056678	No	0.640962	No	Up
XP_011088937	CDS_1429_Unigene_3140	CDS_36087_Unigene_56942	bifunctional nitrilase nitrile hydratase NIT4A	261.652	1596.29	6.1008	2.609	0.0568287	No	0.640962	No	Up
XP_011097955	CDS_17580_Unigene_29807	CDS_23224_Unigene_36797	G-type lectin S-receptor-like serine threonine- kinase At4g27290	132.088	960.389	7.27081	2.86212	0.0568456	No	0.640962	No	Up
XP_011100796	CDS_13443_Unigene_23928	CDS_16547_Unigene_27519	beta-D-xylosidase 1	2624.1	11291.7	4.30308	2.10537	0.05674	No	0.640962	No	Up
XP_011075039	CDS_18805_Unigene_31476	CDS_14677_Unigene_24843	PREDICTED: uncharacterized protein LOC105159622	12.6199	62.9958	4.99178	2.31956	0.0570985	No	0.642559	No	Up
XP_011075818	CDS_18701_Unigene_31323	CDS_20126_Unigene_32493	cell division cycle cofactor of APC complex-like	196.87	1295.57	6.58085	2.71827	0.0570628	No	0.642559	No	Up
XP_011081891	CDS_14815_Unigene_25933	CDS_2443_Unigene_5148	pentatricopeptide repeat-containing mitochondrial	14.3025	74.8818	5.23556	2.38834	0.0572208	No	0.642982	No	Up
XP_011093072	CDS_13652_Unigene_24220	CDS_52_Unigene_115	UDP-D-xylose:L-fucose alpha-1,3-D-xylosyltransferase MGP4	14.3025	74.8818	5.23556	2.38834	0.0572208	No	0.642982	No	Up
XP_011072435	CDS_9318_Unigene_17962	CDS_7444_Unigene_14050	clavaminate synthase At3g21360	799.26	3685.85	4.61158	2.20526	0.0573377	No	0.643459	No	Up
XP_012849252	CDS_25451_Unigene_40641	CDS_7881_Unigene_14724	WAT1-related At3g28050	177.52	1198.11	6.74915	2.75471	0.057348	No	0.643459	No	Up
XP_011077244	CDS_8609_Unigene_16820	CDS_6776_Unigene_12880	12-oxophytodienoate reductase 1-like	129.564	20.2062	0.155955	-2.6808	0.0577499	No	0.646169	No	Down
XP_011084221	CDS_15643_Unigene_27079	CDS_8109_Unigene_15111	PREDICTED: uncharacterized protein LOC105166536	179.202	24.9606	0.139287	-2.84387	0.0577552	No	0.646169	No	Down
XP_011083369	CDS_29563_Unigene_46348	CDS_23923_Unigene_37770	PREDICTED: protein LYK5	11.7786	57.0528	4.84378	2.27613	0.0576535	No	0.646169	No	Up
XP_011096635	CDS_31230_Unigene_48759	CDS_22999_Unigene_36498	auxin response factor 6 isoform X1	2518.09	10774.7	4.2789	2.09724	0.0577598	No	0.646169	No	Up
XP_012858286	CDS_20766_Unigene_34135	CDS_10171_Unigene_18221	metal-nicotianamine transporter YSL3-like isoform X1	445.903	53.487	0.119952	-3.05947	0.0578288	No	0.646465	No	Down
XP_011095028	CDS_25111_Unigene_40178	CDS_21757_Unigene_34792	phosphoinositide phosphatase SAC8	1490.83	240.097	0.161049	-2.63443	0.0579602	No	0.647453	No	Down
XP_011098086	CDS_17262_Unigene_29399	CDS_22681_Unigene_36064	PREDICTED: LOW QUALITY PROTEIN: uncharacterized protein LOC105176851	788.323	103.408	0.131175	-2.93044	0.0580025	No	0.647453	No	Down
XP_011095336	CDS_5668_Unigene_11753	CDS_1677_Unigene_3711	PREDICTED: uncharacterized protein LOC105174823 isoform X2	120.31	884.318	7.35035	2.87781	0.0582194	No	0.649396	No	Up
XP_011088597	CDS_21028_Unigene_34523	CDS_12768_Unigene_22097	L-ascorbate peroxidase peroxisomal	4974.76	20733.9	4.16782	2.05929	0.0583335	No	0.650191	No	Up
XP_011076028	CDS_2497_Unigene_5804	CDS_1949_Unigene_4142	bidirectional sugar transporter SWEET3b	641.932	80.8248	0.125909	-2.98955	0.058602	No	0.65104	No	Down
XP_011093778	CDS_14344_Unigene_25245	CDS_1968_Unigene_4207	PREDICTED: uncharacterized protein LOC105173649	164.9	23.772	0.14416	-2.79426	0.0585012	No	0.65104	No	Down
XP_011101335	CDS_33997_Unigene_52833	CDS_11383_Unigene_19998	sterol 3-beta-glucosyltransferase UGT80B1	433.283	52.2984	0.120703	-3.05047	0.0585745	No	0.65104	No	Down
XP_012835880	CDS_6462_Unigene_13042	CDS_12497_Unigene_21708	PREDICTED: LOW QUALITY PROTEIN: ankyrin-3-like	76.5607	14.2632	0.186299	-2.42431	0.0586241	No	0.65104	No	Down
XP_011077018	CDS_20244_Unigene_33409	CDS_26983_Unigene_41983	serine threonine- kinase CDL1-like	292.781	1713.96	5.85406	2.54944	0.0586117	No	0.65104	No	Up
XP_011073687	CDS_36158_Unigene_55696	CDS_31587_Unigene_48425	PREDICTED: uncharacterized protein At5g05190-like	853.946	115.294	0.135013	-2.88883	0.0588053	No	0.652575	No	Down
XP_011076199	CDS_13296_Unigene_23732	CDS_12011_Unigene_20976	PREDICTED: uncharacterized protein LOC105160499	1403.33	6022.63	4.29167	2.10154	0.0589828	No	0.654067	No	Up
XP_011072686	CDS_13865_Unigene_24541	CDS_7104_Unigene_13459	PREDICTED: uncharacterized protein LOC105157880	250.715	32.0922	0.128003	-2.96576	0.0593043	No	0.656316	No	Down
XP_011074120	CDS_32816_Unigene_51113	CDS_27570_Unigene_42801	eukaryotic translation initiation factor 5B	4994.95	1149.38	0.230107	-2.11962	0.0594299	No	0.656316	No	Down
XP_011081892	CDS_29246_Unigene_45944	CDS_25023_Unigene_39271	ABC transporter G family member 32-like	1117.28	164.027	0.146809	-2.76799	0.0592295	No	0.656316	No	Down
XP_011089265	CDS_17898_Unigene_30254	CDS_14004_Unigene_23889	receptor-like serine threonine- kinase NCRK isoform X1	835.437	112.917	0.135159	-2.88727	0.0595747	No	0.656316	No	Down
XP_011102085	CDS_26363_Unigene_41890	CDS_24852_Unigene_39013	BTB POZ domain-containing At4g08455-like	1223.29	185.422	0.151576	-2.72188	0.0593558	No	0.656316	No	Down
XP_012832303	CDS_11191_Unigene_20739	CDS_20979_Unigene_33723	PREDICTED: sialidase	765.607	101.031	0.131962	-2.92181	0.0594375	No	0.656316	No	Down
XP_012839972	CDS_15760_Unigene_27254	CDS_4807_Unigene_9333	translocase of chloroplast 34 isoform X1	7690.56	1813.8	0.235848	-2.08407	0.0594496	No	0.656316	No	Down
XP_011070557	CDS_1261_Unigene_2755	CDS_36161_Unigene_57063	aspartate-semialdehyde dehydrogenase	328.117	1853.03	5.64745	2.4976	0.0595662	No	0.656316	No	Up
XP_012848908	CDS_20635_Unigene_33956	CDS_7575_Unigene_14244	serine threonine- kinase	117.786	861.735	7.31613	2.87108	0.0595073	No	0.656316	No	Up
XP_011087452	CDS_7071_Unigene_14093	CDS_5315_Unigene_10277	PREDICTED: kinesin-4-like	104.324	17.829	0.1709	-2.54878	0.0596284	No	0.656432	No	Down
XP_011077976	CDS_35466_Unigene_54858	CDS_5581_Unigene_10868	PREDICTED: beta-galactosidase-like	682.315	87.9564	0.128909	-2.95558	0.0597904	No	0.65749	No	Down
XP_011097383	CDS_25273_Unigene_40392	CDS_25534_Unigene_39983	serine threonine- kinase HT1-like	1155.14	172.347	0.1492	-2.74468	0.0598112	No	0.65749	No	Down
XP_011077160	CDS_19445_Unigene_32361	CDS_25672_Unigene_40195	serine carboxypeptidase-like 20	50.4796	410.067	8.12342	3.02209	0.0599263	No	0.658279	No	Up
XP_011086684	CDS_17394_Unigene_29588	CDS_16234_Unigene_27129	pentatricopeptide repeat-containing mitochondrial isoform X2	34.4944	268.624	7.78746	2.96115	0.0600341	No	0.658986	No	Up
XP_011090839	CDS_13983_Unigene_24712	CDS_16251_Unigene_27151	AP-5 complex subunit mu	781.592	104.597	0.133825	-2.90158	0.0604008	No	0.662054	No	Down
XP_011076793	CDS_4330_Unigene_9370	CDS_1783_Unigene_3858	zinc finger CONSTANS-LIKE 16	5647.82	23152.7	4.09941	2.03542	0.0603613	No	0.662054	No	Up
XP_011090737	CDS_10561_Unigene_19825	CDS_17512_Unigene_28929	TIME FOR COFFEE	1118.96	166.404	0.148713	-2.7494	0.0606555	No	0.663935	No	Down
XP_011093343	CDS_2617_Unigene_6040	CDS_1816_Unigene_3915	GDSL esterase lipase At4g01130-like	292.781	36.8466	0.12585	-2.99022	0.0607018	No	0.663935	No	Down
XP_012827798	CDS_29175_Unigene_45830	CDS_1572_Unigene_3551	PREDICTED: uncharacterized protein LOC105949076	209.49	1325.29	6.32626	2.66135	0.0607036	No	0.663935	No	Up
XP_011077546	CDS_30757_Unigene_48081	CDS_30330_Unigene_46658	calcium-dependent kinase 13	5927.98	1395.42	0.235395	-2.08685	0.0608264	No	0.66401	No	Down
XP_011085521	CDS_23464_Unigene_37902	CDS_8470_Unigene_15691	wall-associated receptor kinase-like 14	324.752	40.4124	0.124441	-3.00647	0.0608605	No	0.66401	No	Down
XP_012847616	CDS_2364_Unigene_5408	CDS_19966_Unigene_32298	PREDICTED: remorin-like	196.87	27.3378	0.138862	-2.84828	0.0609292	No	0.66401	No	Down
XP_011073564	CDS_4645_Unigene_9942	CDS_34188_Unigene_51986	NRT1 PTR FAMILY -like	10.0959	45.1668	4.47377	2.16149	0.060902	No	0.66401	No	Up
XP_011088234	CDS_21574_Unigene_35398	CDS_2066_Unigene_4437	caffeoyl- O-methyltransferase	129.564	919.976	7.10054	2.82793	0.0608247	No	0.66401	No	Up
XP_012854590	CDS_6476_Unigene_13057	CDS_5879_Unigene_11525	SNF1-related kinase regulatory subunit gamma-1	5684.84	23212.2	4.08317	2.02969	0.0610196	No	0.664519	No	Up
XP_011075539	CDS_34772_Unigene_53901	CDS_19707_Unigene_31965	ARF guanine-nucleotide exchange factor GNOM	100.959	753.572	7.46413	2.89997	0.0610874	No	0.66478	No	Up
XP_011072872	CDS_15380_Unigene_26712	CDS_100_Unigene_228	BTB POZ domain-containing At5g41330-like	790.847	106.974	0.135265	-2.88614	0.0612549	No	0.665172	No	Down
XP_011082634	CDS_27699_Unigene_43798	CDS_11308_Unigene_19890	HUA2 2	1387.35	223.457	0.161068	-2.63426	0.061183	No	0.665172	No	Down
XP_012845050	CDS_467_Unigene_1019	CDS_3447_Unigene_6909	glutamyl-tRNA(Gln) amidotransferase subunit chloroplastic mitochondrial	1208.99	185.422	0.15337	-2.70492	0.0612165	No	0.665172	No	Down
XP_011099461	CDS_4371_Unigene_9459	CDS_3464_Unigene_6940	PREDICTED: uncharacterized protein At4g37920, chloroplastic	671.378	3140.28	4.67736	2.2257	0.061334	No	0.665555	No	Up
XP_011079243	CDS_27791_Unigene_43952	CDS_23227_Unigene_36800	PREDICTED: aladin	487.969	2465.16	5.05187	2.33682	0.061397	No	0.665674	No	Up
XP_011092997	CDS_6068_Unigene_12393	CDS_8389_Unigene_15550	pentatricopeptide repeat-containing mitochondrial	20.1918	120.049	5.9454	2.57177	0.0614326	No	0.665674	No	Up
XP_011076751	CDS_39337_Unigene_61092	CDS_2420_Unigene_5104	probable carboxylesterase 18	688.205	90.3336	0.13126	-2.9295	0.0615593	No	0.666001	No	Down
XP_011096274	CDS_30872_Unigene_48261	CDS_32014_Unigene_48962	transmembrane 9 superfamily member 1-like	3794.38	851.037	0.224289	-2.15657	0.0615385	No	0.666001	No	Down
XP_011097444	CDS_5424_Unigene_11352	CDS_18845_Unigene_30763	mitochondrial carnitine acylcarnitine carrier	1954.4	357.769	0.183058	-2.44963	0.0615987	No	0.666001	No	Down
XP_012856941	CDS_20248_Unigene_33415	CDS_435_Unigene_949	late blight resistance homolog R1B-8	195.188	27.3378	0.140059	-2.83589	0.0616384	No	0.666001	No	Down
XP_011076987	CDS_24062_Unigene_38723	CDS_24748_Unigene_38859	double-stranded RNA-binding 2-like	904.426	3987.75	4.40915	2.1405	0.061745	No	0.66668	No	Up
XP_011094878	CDS_5213_Unigene_10977	CDS_2152_Unigene_4614	PREDICTED: uncharacterized protein LOC105174462 isoform X1	447.585	55.8642	0.124812	-3.00217	0.0620233	No	0.668733	No	Down
XP_011073513	CDS_18925_Unigene_31620	CDS_2116_Unigene_4536	PREDICTED: uncharacterized protein LOC105158445	620.899	2946.54	4.7456	2.24659	0.0619958	No	0.668733	No	Up
XP_011099226	CDS_20466_Unigene_33728	CDS_11767_Unigene_20605	geraniol 8-hydroxylase-like	32.8117	246.04	7.49854	2.90661	0.0620925	No	0.669004	No	Up
XP_011074403	CDS_3372_Unigene_7446	CDS_537_Unigene_1173	probable WRKY transcription factor 7	242.302	32.0922	0.132447	-2.91651	0.0622472	No	0.66972	No	Down
XP_011097493	CDS_7115_Unigene_14176	CDS_31453_Unigene_48237	14-3-3 1	2115.09	8815.84	4.16806	2.05938	0.0622126	No	0.66972	No	Up
XP_012838935	CDS_25868_Unigene_41177	CDS_22923_Unigene_36402	ras-related Rab7	1377.25	223.457	0.162248	-2.62372	0.0624098	No	0.670519	No	Down
XP_011098692	CDS_6828_Unigene_13693	CDS_10801_Unigene_19108	probable mitochondrial saccharopine dehydrogenase-like oxidoreductase At5g39410	544.338	2661.27	4.88901	2.28954	0.0623987	No	0.670519	No	Up
XP_011080632	CDS_20704_Unigene_34057	CDS_20904_Unigene_33621	PREDICTED: uncharacterized protein LOC105163839	936.396	134.312	0.143435	-2.80153	0.0626995	No	0.672572	No	Down
XP_011083674	CDS_28250_Unigene_44563	CDS_8087_Unigene_15073	zinc-finger homeodomain 5	462.729	58.2414	0.125865	-2.99005	0.062776	No	0.672572	No	Down
XP_011095744	CDS_26663_Unigene_42313	CDS_26339_Unigene_41116	metal tolerance 9-like	659.6	86.7678	0.131546	-2.92636	0.0627782	No	0.672572	No	Down
XP_011081487	CDS_9595_Unigene_18351	CDS_16382_Unigene_27306	U-box domain-containing 45-like	170.789	1124.42	6.58364	2.71889	0.0626905	No	0.672572	No	Up
XP_011079996	CDS_14945_Unigene_26079	CDS_7829_Unigene_14638	E3 ubiquitin ligase DRIP2	470.301	59.43	0.126366	-2.98432	0.0631173	No	0.673097	No	Down
XP_011080363	CDS_36768_Unigene_56520	CDS_32651_Unigene_49833	NAD(H) kinase 1	1274.61	202.062	0.158529	-2.65719	0.062981	No	0.673097	No	Down
XP_011097626	CDS_40257_Unigene_63745	CDS_15811_Unigene_26544	nitrate reductase [NADH] 2	8936.57	2153.74	0.241003	-2.05287	0.0630251	No	0.673097	No	Down
XP_011080251	CDS_25711_Unigene_40957	CDS_17708_Unigene_29184	lysine-specific demethylase JMJD5	196.029	1243.28	6.3423	2.66501	0.0631375	No	0.673097	No	Up
XP_011088010	CDS_2088_Unigene_4713	CDS_27543_Unigene_42750	tetraketide alpha-pyrone reductase 1-like	193.505	1232.58	6.36975	2.67124	0.0629739	No	0.673097	No	Up
XP_011094888	CDS_8935_Unigene_17345	CDS_485_Unigene_1039	PREDICTED: laccase-17-like	50.4796	398.181	7.88796	2.97965	0.0631364	No	0.673097	No	Up
XP_011100517	CDS_17995_Unigene_30394	CDS_19305_Unigene_31402	ribulose-1,5 bisphosphate carboxylase oxygenase large subunit N- chloroplastic isoform X1	879.186	3867.7	4.39919	2.13724	0.0629956	No	0.673097	No	Up
XP_011084301	CDS_24709_Unigene_39650	CDS_9818_Unigene_17716	vacuolar amino acid transporter 1 isoform X2	826.182	3668.02	4.43972	2.15047	0.0632616	No	0.673947	No	Up
XP_011088655	CDS_21878_Unigene_35798	CDS_24762_Unigene_38875	serine threonine- kinase HT1	2870.6	604.997	0.210756	-2.24635	0.0633092	No	0.673981	No	Down
XP_011071835	CDS_5536_Unigene_11543	CDS_6304_Unigene_12133	probable polygalacturonase non-catalytic subunit JP650	450.951	57.0528	0.126517	-2.9826	0.063489	No	0.674111	No	Down
XP_011072943	CDS_20646_Unigene_33974	CDS_470_Unigene_1019	carbon catabolite repressor 4 homolog 5 isoform X1	1906.44	350.637	0.183922	-2.44284	0.0633878	No	0.674111	No	Down
XP_011102330	CDS_1952_Unigene_4501	CDS_7265_Unigene_13763	DNA mismatch repair MSH2-like isoform X1	1362.95	222.268	0.163079	-2.61636	0.0635202	No	0.674111	No	Down
XP_011073866	CDS_19592_Unigene_32571	CDS_14396_Unigene_24416	xylosyltransferase 1	71.5127	552.699	7.72868	2.95022	0.0635434	No	0.674111	No	Up
XP_011092459	CDS_32181_Unigene_50187	CDS_29522_Unigene_45523	GATA transcription factor 24-like isoform X2	37.8597	290.018	7.66035	2.93741	0.0635011	No	0.674111	No	Up
XP_011091535	CDS_35123_Unigene_54369	CDS_407_Unigene_892	disease resistance RGA3	315.497	40.4124	0.128091	-2.96476	0.0637613	No	0.675949	No	Down
XP_011083165	CDS_30055_Unigene_47052	CDS_25216_Unigene_39552	dnaJ homolog subfamily A member mitochondrial isoform X1	25.2398	165.215	6.54583	2.71058	0.0638332	No	0.676105	No	Up
XP_011088487	CDS_13103_Unigene_23456	CDS_19194_Unigene_31247	fructose-bisphosphate aldolase chloroplastic	3633.69	14858.7	4.08915	2.0318	0.063865	No	0.676105	No	Up
XP_011099347	CDS_15017_Unigene_26180	CDS_24723_Unigene_38835	xyloglucan galactosyltransferase KATAMARI1 homolog	120.31	849.849	7.06385	2.82045	0.063922	No	0.676237	No	Up
XP_011092998	CDS_37458_Unigene_57469	CDS_29470_Unigene_45443	probable ubiquitin-conjugating enzyme E2 23	915.363	131.935	0.144134	-2.79452	0.0640284	No	0.67642	No	Down
XP_011090258	CDS_9841_Unigene_18726	CDS_10204_Unigene_18274	molybdopterin synthase catalytic subunit	977.621	4213.59	4.31004	2.1077	0.0640103	No	0.67642	No	Up
XP_011090597	CDS_25344_Unigene_40475	CDS_6765_Unigene_12854	cytochrome P450 CYP736A12-like	20.1918	116.483	5.76881	2.52827	0.0641245	No	0.676964	No	Up
XP_012845886	CDS_29043_Unigene_45595	CDS_26449_Unigene_41258	flavin-containing monooxygenase FMO GS-OX-like 4 isoform X1	177.52	1147	6.46124	2.69181	0.0641883	No	0.677166	No	Up
XP_011088229	CDS_11387_Unigene_21050	CDS_7804_Unigene_14601	CHROMATIN REMODELING 24	1490.83	253.172	0.169819	-2.55793	0.0645316	No	0.679161	No	Down
XP_014628064	CDS_25022_Unigene_40079	CDS_34324_Unigene_52431	cysteine-rich receptor kinase 8	302.877	39.2238	0.129504	-2.94893	0.0644704	No	0.679161	No	Down
XP_011082007	CDS_12442_Unigene_22569	CDS_20947_Unigene_33673	peroxidase 46	27.7638	188.987	6.80698	2.76701	0.0645568	No	0.679161	No	Up
XP_011091958	CDS_35090_Unigene_54315	CDS_31386_Unigene_48158	phototropin-2 isoform X1	3594.15	14643.5	4.07428	2.02654	0.0646011	No	0.679161	No	Up
XP_012832000	CDS_3025_Unigene_6799	CDS_8017_Unigene_14962	PREDICTED: uncharacterized protein LOC105952947	164.059	1078.06	6.57119	2.71615	0.0645258	No	0.679161	No	Up
XP_011078794	CDS_23329_Unigene_37701	CDS_20574_Unigene_33129	serine arginine-rich SC35-like splicing factor SCL33	1113.92	171.158	0.153655	-2.70224	0.0647478	No	0.679293	No	Down
XP_011100319	CDS_20665_Unigene_34002	CDS_23164_Unigene_36720	general transcription factor IIE subunit 1-like	826.182	116.483	0.140989	-2.82634	0.0647143	No	0.679293	No	Down
XP_011077667	CDS_38071_Unigene_58306	CDS_7969_Unigene_14883	PREDICTED: L-arabinokinase-like	51.3209	399.37	7.78181	2.96011	0.06468	No	0.679293	No	Up
XP_011090485	CDS_10662_Unigene_19965	CDS_2397_Unigene_5062	PREDICTED: uncharacterized protein LOC105171158	35.3357	262.681	7.43386	2.89411	0.0649007	No	0.679888	No	Up
XP_011100056	CDS_10446_Unigene_19678	CDS_9090_Unigene_16678	probable LRR receptor-like serine threonine- kinase At5g10290	919.569	3977.05	4.32491	2.11267	0.0649389	No	0.679888	No	Up
XP_012834823	CDS_18119_Unigene_30556	CDS_13876_Unigene_23684	aspartic ase 2	13.4612	64.1844	4.7681	2.25341	0.0649379	No	0.679888	No	Up
XP_011083362	CDS_18151_Unigene_30598	CDS_34344_Unigene_52600	PREDICTED: uncharacterized protein LOC105165907	817.769	115.294	0.140986	-2.82637	0.0650267	No	0.680338	No	Down
XP_011075809	CDS_36081_Unigene_55594	CDS_29365_Unigene_45302	PREDICTED: uncharacterized protein LOC105160226	952.381	140.255	0.147267	-2.76349	0.0652631	No	0.682341	No	Down
XP_011091174	CDS_14242_Unigene_25086	CDS_3909_Unigene_7837	cellulose synthase partial	1643.11	291.207	0.177229	-2.49631	0.0655112	No	0.684464	No	Down
XP_011089754	CDS_5089_Unigene_10757	CDS_6944_Unigene_13183	receptor 2	63.9408	13.0746	0.20448	-2.28997	0.065581	No	0.684722	No	Down
XP_011089505	CDS_16334_Unigene_28130	CDS_23201_Unigene_36764	transcription factor LUX	114.42	807.059	7.05346	2.81833	0.0656731	No	0.685212	No	Up
XP_012839727	CDS_12011_Unigene_21978	CDS_12028_Unigene_21000	alanine--glyoxylate aminotransferase 2 homolog mitochondrial-like	73.1954	552.699	7.55101	2.91667	0.0662166	No	0.690408	No	Up
XP_011084930	CDS_19257_Unigene_32113	CDS_23355_Unigene_36984	PREDICTED: uncharacterized protein LOC105167066	2616.52	10651	4.07068	2.02527	0.0662736	No	0.690529	No	Up
XP_011099895	CDS_8068_Unigene_15925	CDS_7555_Unigene_14205	thiol-disulfide oxidoreductase LTO1-like	202.76	1250.41	6.16694	2.62456	0.066418	No	0.691558	No	Up
XP_011094631	CDS_22681_Unigene_36848	CDS_23390_Unigene_37029	RNA polymerase sigma factor chloroplastic isoform X1	4491	17960.9	3.99932	1.99975	0.0664917	No	0.691851	No	Up
XP_011074041	CDS_21882_Unigene_35810	CDS_25719_Unigene_40256	PREDICTED: UPF0047 protein C4A8.02c	1999.83	382.729	0.191381	-2.38548	0.0666657	No	0.693187	No	Down
XP_011075986	CDS_36432_Unigene_56068	CDS_5155_Unigene_9961	PREDICTED: uncharacterized protein LOC105160354	587.246	78.4476	0.133586	-2.90416	0.0668885	No	0.694135	No	Down
XP_011077488	CDS_7169_Unigene_14279	CDS_6822_Unigene_12975	125 kDa kinesin-related -like	306.243	40.4124	0.131962	-2.92181	0.0668498	No	0.694135	No	Down
XP_011097507	CDS_31334_Unigene_48881	CDS_7388_Unigene_13961	TRANSPARENT TESTA 12	285.21	38.0352	0.133359	-2.90662	0.0669399	No	0.694135	No	Down
XP_011095434	CDS_29301_Unigene_46014	CDS_27594_Unigene_42829	cell differentiation RCD1 homolog	126.199	865.301	6.85664	2.7775	0.0669237	No	0.694135	No	Up
XP_011094655	CDS_25323_Unigene_40443	CDS_5321_Unigene_10290	cytokinin riboside 5 -monophosphate phosphoribohydrolase LOG3	2111.73	412.444	0.195311	-2.35615	0.0670265	No	0.694559	No	Down
XP_011100182	CDS_4073_Unigene_8885	CDS_11520_Unigene_20214	RING-H2 finger ATL80-like	46.2729	350.637	7.57758	2.92174	0.0672561	No	0.696463	No	Up
XP_011078836	CDS_30367_Unigene_47536	CDS_31252_Unigene_47976	PREDICTED: uncharacterized protein LOC105162501 isoform X3	372.707	48.7326	0.130753	-2.93508	0.0674708	No	0.697545	No	Down
XP_011087732	CDS_1966_Unigene_4531	CDS_14761_Unigene_24968	UDP-glucose:glyco glucosyltransferase	3074.21	679.879	0.221156	-2.17686	0.0675903	No	0.697545	No	Down
XP_011088344	CDS_17368_Unigene_29542	CDS_16988_Unigene_28194	probable 1-acyl-sn-glycerol-3-phosphate acyltransferase 5	1278.82	210.382	0.164513	-2.60372	0.067547	No	0.697545	No	Down
XP_011099131	CDS_12922_Unigene_23191	CDS_3279_Unigene_6572	PREDICTED: uncharacterized protein LOC105177615	228.841	32.0922	0.140238	-2.83405	0.0674189	No	0.697545	No	Down
XP_011097360	CDS_28208_Unigene_44498	CDS_5339_Unigene_10317	G-type lectin S-receptor-like serine threonine- kinase At1g34300	82.45	607.374	7.36658	2.881	0.0675861	No	0.697545	No	Up
XP_011081002	CDS_7673_Unigene_15207	CDS_5747_Unigene_11257	PREDICTED: uncharacterized protein LOC105164125	205.284	29.715	0.144751	-2.78836	0.0676445	No	0.69763	No	Down
XP_011079294	CDS_18013_Unigene_30425	CDS_4350_Unigene_8508	VIN3 2 isoform X2	352.516	46.3554	0.131499	-2.92688	0.0678776	No	0.698126	No	Down
XP_011082902	CDS_28721_Unigene_45198	CDS_19619_Unigene_31843	callose synthase 7	1968.7	377.975	0.191992	-2.38088	0.0678823	No	0.698126	No	Down
XP_011090082	CDS_24429_Unigene_39241	CDS_22244_Unigene_35426	PREDICTED: uncharacterized protein LOC105170859	292.781	39.2238	0.13397	-2.90002	0.0679685	No	0.698126	No	Down
XP_011071233	CDS_31994_Unigene_49861	CDS_8892_Unigene_16378	histidine kinase 3 isoform X1	1250.21	5153.77	4.12232	2.04346	0.0677749	No	0.698126	No	Up
XP_011078598	CDS_28879_Unigene_45398	CDS_28102_Unigene_43540	two-component response regulator ARR12-like	440.855	2208.42	5.0094	2.32464	0.0679424	No	0.698126	No	Up
XP_012859053	CDS_21083_Unigene_34621	CDS_4070_Unigene_8062	membrane-bound O-acyltransferase isoform X1	221.269	1322.91	5.97875	2.57984	0.0679224	No	0.698126	No	Up
XP_011085649	CDS_13292_Unigene_23726	CDS_21480_Unigene_34421	PREDICTED: uncharacterized protein LOC105167573	312.973	41.601	0.132922	-2.91135	0.0680237	No	0.69822	No	Down
XP_011099451	CDS_23839_Unigene_38387	CDS_22568_Unigene_35896	PREDICTED: uncharacterized protein LOC105177867	493.858	65.373	0.132372	-2.91733	0.0681032	No	0.698564	No	Down
XP_011071314	CDS_13867_Unigene_24544	CDS_7463_Unigene_14075	RNA polymerase II C-terminal domain phosphatase-like 3	192.664	28.5264	0.148063	-2.75572	0.0681542	No	0.698615	No	Down
XP_011072681	CDS_39591_Unigene_61854	CDS_3074_Unigene_6190	subtilisin-like protease	5331.48	1300.33	0.243896	-2.03566	0.0682852	No	0.698643	No	Down
XP_011073627	CDS_40276_Unigene_63777	CDS_36045_Unigene_56633	probable calcium-binding CML18	2737.68	587.168	0.214477	-2.22111	0.0682796	No	0.698643	No	Down
XP_011075511	CDS_12316_Unigene_22358	CDS_19307_Unigene_31406	50S ribosomal chloroplastic	800.101	115.294	0.1441	-2.79486	0.068341	No	0.698643	No	Down
XP_012848879	CDS_1902_Unigene_4429	CDS_35218_Unigene_54703	GDSL esterase lipase At5g55050-like	125.358	21.3948	0.17067	-2.55072	0.0683306	No	0.698643	No	Down
XP_011093009	CDS_7267_Unigene_14492	CDS_36456_Unigene_57616	homeobox-leucine zipper ATHB-12	37.0183	268.624	7.2565	2.85927	0.0684343	No	0.699014	No	Up
XP_012849873	CDS_30384_Unigene_47566	CDS_27105_Unigene_42141	ATP phosphoribosyltransferase chloroplastic-like	813.562	3528.95	4.33765	2.11692	0.0684694	No	0.699014	No	Up
XP_011090958	CDS_10267_Unigene_19402	CDS_22195_Unigene_35345	probable phosphatase 2C 40	107.69	753.572	6.99762	2.80686	0.068649	No	0.700377	No	Up
XP_012835553	CDS_1785_Unigene_4213	CDS_5145_Unigene_9950	isovaleryl- mitochondrial	1763.42	328.054	0.186033	-2.42637	0.0687639	No	0.700607	No	Down
XP_011088238	CDS_10445_Unigene_19677	CDS_5655_Unigene_11043	E3 ubiquitin- ligase MBR2	620.899	2849.07	4.58863	2.19806	0.0687369	No	0.700607	No	Up
XP_011076290	CDS_5806_Unigene_11988	CDS_20986_Unigene_33730	PREDICTED: uncharacterized protein LOC105160556	33.653	236.531	7.02853	2.81322	0.068868	No	0.701197	No	Up
XP_011035818	CDS_20350_Unigene_33563	CDS_21796_Unigene_34831	PREDICTED: phosphomannomutase	5150.6	1257.54	0.244154	-2.03414	0.069007	No	0.701671	No	Down
XP_011083621	CDS_14213_Unigene_25056	CDS_8269_Unigene_15353	ocs element-binding factor 1	1062.59	166.404	0.156602	-2.67483	0.0690013	No	0.701671	No	Down
XP_011100269	CDS_29580_Unigene_46377	CDS_14407_Unigene_24432	PREDICTED: uncharacterized protein LOC105178485 isoform X1	554.434	74.8818	0.13506	-2.88833	0.0691517	No	0.702672	No	Down
XP_009767889	CDS_28414_Unigene_44813	CDS_29633_Unigene_45670	probable serine threonine- kinase At1g01540	394.582	52.2984	0.132541	-2.91549	0.0692189	No	0.702884	No	Down
XP_011080888	CDS_1632_Unigene_3727	CDS_7334_Unigene_13862	aluminum-activated malate transporter 9-like	246.509	34.4694	0.13983	-2.83825	0.0693759	No	0.704008	No	Down
XP_011098304	CDS_35265_Unigene_54578	CDS_31957_Unigene_48884	SPA1-RELATED 4-like isoform X3	55.5275	414.821	7.47055	2.90122	0.0695298	No	0.705098	No	Up
XP_011077072	CDS_22802_Unigene_37008	CDS_4343_Unigene_8496	GDSL esterase lipase At5g33370-like	392.899	2007.54	5.10957	2.3532	0.0695985	No	0.705323	No	Up
XP_011083221	CDS_2833_Unigene_6450	CDS_6336_Unigene_12172	ROOT PRIMORDIUM DEFECTIVE 1 isoform X1	337.372	45.1668	0.133878	-2.901	0.0697266	No	0.70568	No	Down
XP_012841259	CDS_15479_Unigene_26842	CDS_18208_Unigene_29868	amino acid permease 6-like	3113.75	700.085	0.224837	-2.15305	0.0696996	No	0.70568	No	Down
XP_011093644	CDS_862_Unigene_2089	CDS_3632_Unigene_7333	pentatricopeptide repeat-containing mitochondrial	818.61	120.049	0.146649	-2.76956	0.0698103	No	0.706057	No	Down
XP_011084842	CDS_11230_Unigene_20798	CDS_13432_Unigene_23097	mini-chromosome maintenance complex-binding isoform X1	4511.19	1092.32	0.242136	-2.04611	0.0699618	No	0.707117	No	Down
XP_012838847	CDS_26382_Unigene_41905	CDS_12322_Unigene_21426	ECERIFERUM 1	558.641	76.0704	0.136171	-2.87651	0.0700337	No	0.707373	No	Down
XP_011078028	CDS_1113_Unigene_2507	CDS_4994_Unigene_9677	nuclease HARBI1	1628.81	298.339	0.183164	-2.44879	0.0705319	No	0.709103	No	Down
XP_012828580	CDS_13096_Unigene_23445	CDS_7236_Unigene_13705	kDa proline-rich -like	40502.3	10534.6	0.260098	-1.94287	0.0704049	No	0.709103	No	Down
XP_012835516	CDS_33656_Unigene_52346	CDS_21748_Unigene_34777	TPX2 isoform X1	254.922	35.658	0.139878	-2.83776	0.070357	No	0.709103	No	Down
XP_012849961	CDS_3609_Unigene_7842	CDS_2065_Unigene_4436	Fanconi anemia group D2 homolog	176.678	27.3378	0.154732	-2.69216	0.0705202	No	0.709103	No	Down
XP_011076735	CDS_27780_Unigene_43936	CDS_28093_Unigene_43529	coronatine-insensitive 1	538.449	2537.66	4.71291	2.23662	0.0702996	No	0.709103	No	Up
XP_011095930	CDS_39104_Unigene_60665	CDS_35896_Unigene_56200	PREDICTED: uncharacterized protein LOC105175244	1777.72	7097.13	3.99226	1.99721	0.0703558	No	0.709103	No	Up
XP_012838589	CDS_36494_Unigene_56156	CDS_32883_Unigene_50156	UPSTREAM OF FLC isoform X2	41.225	299.527	7.26567	2.8611	0.0705283	No	0.709103	No	Up
XP_011084179	CDS_9637_Unigene_18418	CDS_19088_Unigene_31096	NEDD8 ultimate buster 1	49.6382	366.089	7.37513	2.88267	0.070861	No	0.711939	No	Up
XP_011084668	CDS_23072_Unigene_37376	CDS_22665_Unigene_36043	ER membrane complex subunit 10	1659.1	306.659	0.184835	-2.43569	0.0709082	No	0.711942	No	Down
XP_011093476	CDS_22277_Unigene_36354	CDS_6309_Unigene_12139	probable indole-3-acetic acid-amido synthetase isoform X2	424.028	2112.14	4.98113	2.31647	0.0709876	No	0.712269	No	Up
XP_011088887	CDS_971_Unigene_2249	CDS_5583_Unigene_10878	transmembrane 9 superfamily member 5 isoform X1	530.035	72.5046	0.136792	-2.86994	0.0713546	No	0.713846	No	Down
XP_011089720	CDS_1695_Unigene_3912	CDS_5929_Unigene_11595	5 -adenylylsulfate reductase-like 5 isoform X2	1829.04	350.637	0.191705	-2.38304	0.0713167	No	0.713846	No	Down
XP_011098935	CDS_10411_Unigene_19620	CDS_14726_Unigene_24918	PREDICTED: uncharacterized protein LOC105177466	473.667	64.1844	0.135505	-2.88358	0.0712912	No	0.713846	No	Down
XP_011079994	CDS_2124_Unigene_4792	CDS_1346_Unigene_3019	photosystem II reaction center W chloroplastic	23607.6	86193.7	3.6511	1.86833	0.0713799	No	0.713846	No	Up
XP_012851898	CDS_17399_Unigene_29595	CDS_21389_Unigene_34306	ultraviolet-B receptor UVR8	164.9	1038.84	6.2998	2.65531	0.0713259	No	0.713846	No	Up
XP_011070060	CDS_27900_Unigene_44112	CDS_24248_Unigene_38183	methyltransferase At1g22800	102.642	710.783	6.92489	2.79179	0.0715879	No	0.715454	No	Up
XP_011092552	CDS_21051_Unigene_34554	CDS_16576_Unigene_27568	CBS domain-containing chloroplastic	1650.68	6559.88	3.97404	1.99061	0.0717235	No	0.715867	No	Up
XP_012854511	CDS_10685_Unigene_19998	CDS_11344_Unigene_19935	DNA ligase 3	52.1622	382.729	7.33729	2.87525	0.0716931	No	0.715867	No	Up
XP_011083668	CDS_38390_Unigene_58759	CDS_10978_Unigene_19376	flocculation FLO11	496.382	67.7502	0.136488	-2.87316	0.0718045	No	0.716205	No	Down
XP_011079668	CDS_32354_Unigene_50425	CDS_29298_Unigene_45206	probable GTP diphosphokinase chloroplastic	2417.13	509.909	0.210957	-2.24498	0.072033	No	0.718012	No	Down
XP_011081207	CDS_1825_Unigene_4305	CDS_36501_Unigene_57976	probable trehalose-phosphate phosphatase F	141.343	23.772	0.168187	-2.57186	0.0721286	No	0.718493	No	Down
XP_011101985	CDS_34394_Unigene_53356	CDS_29456_Unigene_45421	probable galacturonosyltransferase 7	187.616	1141.06	6.08188	2.60452	0.0722608	No	0.719339	No	Up
XP_011074151	CDS_27935_Unigene_44151	CDS_7581_Unigene_14252	PREDICTED: uncharacterized protein LOC105158932 isoform X1	151.439	24.9606	0.164823	-2.60101	0.0724994	No	0.720024	No	Down
XP_012831156	CDS_7670_Unigene_15202	CDS_5222_Unigene_10101	PREDICTED: protein FAM135B-like	392.899	53.487	0.136134	-2.8769	0.0725349	No	0.720024	No	Down
XP_011076200	CDS_29609_Unigene_46421	CDS_24529_Unigene_38554	lipid phosphate phosphatase 2-like	139.66	905.713	6.48512	2.69713	0.0724881	No	0.720024	No	Up
XP_011088729	CDS_4458_Unigene_9591	CDS_6005_Unigene_11708	glutamate--tRNA chloroplastic mitochondrial	790.005	3380.38	4.27893	2.09725	0.0725484	No	0.720024	No	Up
XP_011098629	CDS_4087_Unigene_8914	CDS_5664_Unigene_11059	probable rhamnogalacturonate lyase B	20.1918	106.974	5.29788	2.40542	0.0725668	No	0.720024	No	Up
XP_011071593	CDS_32908_Unigene_51219	CDS_26441_Unigene_41248	OBERON 2 isoform X2	249.033	35.658	0.143186	-2.80404	0.072776	No	0.721628	No	Down
XP_002266374	CDS_38566_Unigene_59139	CDS_3697_Unigene_7447	derlin- -like	299.512	41.601	0.138896	-2.84792	0.0729081	No	0.721799	No	Down
XP_011099134	CDS_21356_Unigene_35019	CDS_22790_Unigene_36210	zeaxanthin chloroplastic	13177.7	3369.68	0.255711	-1.96741	0.0729358	No	0.721799	No	Down
XP_011091346	CDS_8821_Unigene_17176	CDS_6930_Unigene_13165	PREDICTED: uncharacterized protein LOC105171809	47.9556	347.071	7.23734	2.85546	0.0729018	No	0.721799	No	Up
XP_011075560	CDS_7293_Unigene_14536	CDS_2343_Unigene_4957	pentatricopeptide repeat-containing mitochondrial	215.379	32.0922	0.149003	-2.74659	0.0733203	No	0.723246	No	Down
XP_011083502	CDS_21438_Unigene_35180	CDS_10700_Unigene_18971	zinc finger CCCH domain-containing 6	612.485	86.7678	0.141665	-2.81944	0.0732968	No	0.723246	No	Down
XP_011094952	CDS_40099_Unigene_63170	CDS_9_Unigene_51	PREDICTED: uncharacterized protein LOC105174521	237.254	34.4694	0.145285	-2.78304	0.0732469	No	0.723246	No	Down
XP_012827858	CDS_33148_Unigene_51585	CDS_30858_Unigene_47422	uncharacterized membrane At1g06890-like	100.118	19.0176	0.189952	-2.39629	0.0732707	No	0.723246	No	Down
XP_011070737	CDS_37320_Unigene_57283	CDS_33110_Unigene_50446	pentatricopeptide repeat-containing mitochondrial	93.3872	650.164	6.96203	2.79951	0.0731621	No	0.723246	No	Up
XP_012839620	CDS_27193_Unigene_43070	CDS_27312_Unigene_42418	probable arginine N-methyltransferase 6	1562.34	287.641	0.184109	-2.44137	0.0734137	No	0.723697	No	Down
XP_011091187	CDS_3214_Unigene_7149	CDS_4182_Unigene_8227	1-aminocyclopropane-1-carboxylate oxidase homolog 3-like	5034.5	19331.4	3.83979	1.94103	0.0737042	No	0.725618	No	Up
XP_012844015	CDS_27077_Unigene_42865	CDS_23933_Unigene_37781	ABC transporter I family member chloroplastic isoform X2	92.5459	643.032	6.94826	2.79665	0.0736759	No	0.725618	No	Up
XP_011083617	CDS_3663_Unigene_7936	CDS_7452_Unigene_14056	BEL1-like homeodomain 11	406.361	55.8642	0.137474	-2.86276	0.0737816	No	0.72591	No	Down
XP_002512945	CDS_1347_Unigene_2921	CDS_5629_Unigene_10988	Ocs element-binding	53.0035	11.886	0.224249	-2.15683	0.0739738	No	0.726309	No	Down
XP_011080657	CDS_10668_Unigene_19972	CDS_5042_Unigene_9770	PREDICTED: uncharacterized protein LOC105163859	1191.32	200.873	0.168614	-2.5682	0.0741428	No	0.726309	No	Down
XP_011086923	CDS_23942_Unigene_38552	CDS_20521_Unigene_33057	PREDICTED: uncharacterized protein LOC105168516 isoform X1	733.636	108.163	0.147433	-2.76186	0.0738783	No	0.726309	No	Down
XP_011095438	CDS_4359_Unigene_9434	CDS_5392_Unigene_10448	PREDICTED: uncharacterized protein LOC105174890	99.2765	19.0176	0.191562	-2.38412	0.0742233	No	0.726309	No	Down
XP_012832108	CDS_15704_Unigene_27165	CDS_34753_Unigene_53425	probable anion transporter chloroplastic	557.799	78.4476	0.140638	-2.82995	0.0741232	No	0.726309	No	Down
XP_012844654	CDS_13708_Unigene_24304	CDS_2290_Unigene_4874	dicarboxylate transporter chloroplastic-like	1092.88	179.479	0.164225	-2.60626	0.0742527	No	0.726309	No	Down
XP_011077304	CDS_8622_Unigene_16849	CDS_27475_Unigene_42645	PREDICTED: uncharacterized protein LOC105161348	135.454	875.998	6.46715	2.69313	0.0740292	No	0.726309	No	Up
XP_011095596	CDS_10466_Unigene_19718	CDS_17057_Unigene_28307	PREDICTED: uncharacterized protein LOC105175002 isoform X2	465.253	2231	4.79524	2.2616	0.0742128	No	0.726309	No	Up
XP_011099741	CDS_7297_Unigene_14548	CDS_8861_Unigene_16331	mitogen-activated kinase kinase kinase YODA-like	1802.96	7059.09	3.91528	1.96911	0.074153	No	0.726309	No	Up
XP_012852556	CDS_21355_Unigene_35016	CDS_15035_Unigene_25372	NLP7-like isoform X1	629.312	90.3336	0.143543	-2.80044	0.074405	No	0.726654	No	Down
XP_011072080	CDS_19739_Unigene_32774	CDS_19855_Unigene_32163	PREDICTED: uncharacterized protein LOC105157367	132.088	856.98	6.48794	2.69776	0.0743564	No	0.726654	No	Up
XP_011094926	CDS_15511_Unigene_26886	CDS_18695_Unigene_30542	NRT1 PTR FAMILY -like	66.4648	475.44	7.15326	2.8386	0.0744626	No	0.726654	No	Up
XP_011099941	CDS_13413_Unigene_23890	CDS_11820_Unigene_20694	DNA repair complementing XP-C cells homolog isoform X1	105.166	711.971	6.76999	2.75915	0.0744795	No	0.726654	No	Up
XP_011101623	CDS_9810_Unigene_18680	CDS_6293_Unigene_12117	myosin-10 isoform X2	4791.35	1196.92	0.249808	-2.00111	0.0745692	No	0.727062	No	Down
XP_011099697	CDS_36258_Unigene_55838	CDS_33181_Unigene_50556	cyclin-dependent kinase E-1	683.157	99.8424	0.146149	-2.77449	0.0747287	No	0.728149	No	Down
XP_011100952	CDS_27876_Unigene_44079	CDS_25923_Unigene_40520	GATA transcription factor 5-like	3734.65	903.336	0.24188	-2.04764	0.0749368	No	0.729473	No	Down
XP_012840801	CDS_39862_Unigene_62692	CDS_4721_Unigene_9133	xyloglucan galactosyltransferase KATAMARI1-like	774.02	116.483	0.150491	-2.73225	0.0749607	No	0.729473	No	Down
XP_011082285	CDS_29754_Unigene_46617	CDS_26691_Unigene_41607	serine--tRNA mitochondrial isoform X1	134.612	866.489	6.43693	2.68637	0.0750436	No	0.729812	No	Up
XP_011098474	CDS_5781_Unigene_11936	CDS_8158_Unigene_15194	carbonic chloroplastic-like isoform X2	33034.7	8801.58	0.266435	-1.90815	0.0752915	No	0.730861	No	Down
XP_012827513	CDS_29977_Unigene_46928	CDS_31753_Unigene_48643	serine threonine- phosphatase 6 regulatory subunit 3-like	597.342	85.5792	0.143267	-2.80322	0.0752778	No	0.730861	No	Down
XP_011087500	CDS_12778_Unigene_23001	CDS_10483_Unigene_18662	probable Xaa-Pro aminopeptidase 3	168.265	1031.7	6.13142	2.61622	0.0752959	No	0.730861	No	Up
XP_011083605	CDS_18710_Unigene_31343	CDS_7515_Unigene_14152	pentatricopeptide repeat-containing mitochondrial	267.542	1464.35	5.47337	2.45243	0.0753803	No	0.731213	No	Up
XP_011075029	CDS_21107_Unigene_34667	CDS_7440_Unigene_14043	LRR receptor-like serine threonine- kinase GSO1	253.239	36.8466	0.145501	-2.7809	0.07543	No	0.731228	No	Down
XP_011093260	CDS_1731_Unigene_4052	CDS_36236_Unigene_57156	vestitone reductase-like	232.206	34.4694	0.148443	-2.75202	0.0754919	No	0.731361	No	Down
XP_011089708	CDS_22259_Unigene_36337	CDS_16483_Unigene_27442	probable receptor kinase At5g56460	41.225	286.453	6.94852	2.79671	0.0755777	No	0.731725	No	Up
XP_011086965	CDS_10507_Unigene_19768	CDS_14967_Unigene_25278	rhodanese-like domain-containing chloroplastic	379.438	1897.01	4.99951	2.32179	0.0757979	No	0.733389	No	Up
XP_011088723	CDS_33566_Unigene_52210	CDS_7518_Unigene_14155	calcium-dependent kinase 5 isoform X2	2070.5	425.519	0.205515	-2.28269	0.0758514	No	0.733439	No	Down
XP_011084346	CDS_31341_Unigene_48894	CDS_29317_Unigene_45234	PREDICTED: uncharacterized protein LOC105166619	1828.2	361.334	0.197645	-2.33902	0.0760288	No	0.733753	No	Down
XP_011073766	CDS_22485_Unigene_36628	CDS_25888_Unigene_40474	pre-mRNA-processing 40C	252.398	1397.79	5.53806	2.46938	0.0760108	No	0.733753	No	Up
XP_011076786	CDS_19291_Unigene_32166	CDS_25037_Unigene_39291	mannose-1-phosphate guanylyltransferase 1	1263.67	5000.44	3.95707	1.98443	0.0759445	No	0.733753	No	Up
XP_011082953	CDS_33374_Unigene_51973	CDS_2092_Unigene_4492	TOO MANY MOUTHS	346.626	48.7326	0.140591	-2.83042	0.0762319	No	0.734229	No	Down
XP_011093878	CDS_26394_Unigene_41934	CDS_14922_Unigene_25208	21 kDa	1449.6	265.058	0.182848	-2.45128	0.0762714	No	0.734229	No	Down
XP_011077279	CDS_32723_Unigene_50976	CDS_30552_Unigene_46967	vacuolar -sorting-associated 33 homolog	517.416	2396.22	4.63113	2.21136	0.0761707	No	0.734229	No	Up
XP_011095118	CDS_4429_Unigene_9547	CDS_4724_Unigene_9140	transcription repressor OFP1	16.8265	79.6362	4.73278	2.24269	0.0762716	No	0.734229	No	Up
XP_011079604	CDS_31382_Unigene_48955	CDS_31798_Unigene_48704	PREDICTED: uncharacterized protein LOC105163073 isoform X2	314.656	1643.83	5.22422	2.38522	0.076418	No	0.735172	No	Up
XP_011085242	CDS_37826_Unigene_57969	CDS_33570_Unigene_51114	PREDICTED: cullin-4	5217.06	1326.48	0.254257	-1.97564	0.0765161	No	0.735432	No	Down
XP_011084278	CDS_29414_Unigene_46149	CDS_27416_Unigene_42564	PREDICTED: uncharacterized protein LOC105166577	147.232	922.353	6.26462	2.64723	0.0765419	No	0.735432	No	Up
XP_011098078	CDS_344_Unigene_749	CDS_1640_Unigene_3653	protodermal factor 1-like	3499.08	842.717	0.24084	-2.05385	0.0766478	No	0.735984	No	Down
XP_011089063	CDS_40526_Unigene_64326	CDS_34739_Unigene_53380	PREDICTED: uncharacterized protein LOC105170130	106.007	20.2062	0.190612	-2.39129	0.076854	No	0.736816	No	Down
XP_012836195	CDS_24482_Unigene_39300	CDS_14197_Unigene_24155	PREDICTED: uncharacterized protein LOC105956833 isoform X2	165.741	27.3378	0.164943	-2.59996	0.0769286	No	0.736816	No	Down
XP_011074171	CDS_20120_Unigene_33259	CDS_27288_Unigene_42385	RNA pseudouridine synthase mitochondrial	187.616	1112.53	5.92983	2.56799	0.0769154	No	0.736816	No	Up
XP_011092923	CDS_35818_Unigene_55275	CDS_34061_Unigene_51781	PREDICTED: uncharacterized protein LOC105172991 isoform X2	3440.18	13187.5	3.83338	1.93862	0.0769052	No	0.736816	No	Up
XP_011092394	CDS_1904_Unigene_4432	CDS_15028_Unigene_25361	mediator of RNA polymerase II transcription subunit 12 isoform X2	725.223	109.351	0.150783	-2.72946	0.0772269	No	0.739207	No	Down
XP_009590827	CDS_5105_Unigene_10796	CDS_5103_Unigene_9866	UPF0481 At3g47200-like	124.516	22.5834	0.181369	-2.463	0.0773746	No	0.739739	No	Down
XP_011099247	CDS_37339_Unigene_57296	CDS_8231_Unigene_15287	PREDICTED: uncharacterized protein LOC105177708 isoform X2	395.423	55.8642	0.141277	-2.8234	0.07738	No	0.739739	No	Down
XP_011070518	CDS_13489_Unigene_23980	CDS_11355_Unigene_19961	BASIC PENTACYSTEINE1-like	2323.74	500.4	0.215342	-2.2153	0.0775284	No	0.740226	No	Down
XP_011096978	CDS_1253_Unigene_2744	CDS_2939_Unigene_5975	HMG1 2	8552.92	31777.2	3.71536	1.8935	0.0774849	No	0.740226	No	Up
XP_011078833	CDS_30363_Unigene_47532	CDS_31250_Unigene_47975	PREDICTED: uncharacterized protein LOC105162500	1520.28	285.264	0.18764	-2.41396	0.0777115	No	0.740707	No	Down
XP_011085266	CDS_8934_Unigene_17341	CDS_4912_Unigene_9535	LRR receptor-like serine threonine- kinase FLS2	1415.11	259.115	0.183106	-2.44925	0.0777362	No	0.740707	No	Down
XP_011093686	CDS_2094_Unigene_4722	CDS_1049_Unigene_2284	arginine N-methyltransferase	2789.84	637.089	0.228361	-2.13061	0.0778227	No	0.740707	No	Down
XP_011092622	CDS_3564_Unigene_7777	CDS_3064_Unigene_6177	mechanosensitive ion channel 10-like	37.0183	246.04	6.64644	2.73258	0.0778201	No	0.740707	No	Up
XP_012847508	CDS_30402_Unigene_47590	CDS_31008_Unigene_47647	pentatricopeptide repeat-containing mitochondrial	38.701	260.303	6.72601	2.74975	0.0778038	No	0.740707	No	Up
XP_011101758	CDS_21089_Unigene_34637	CDS_17583_Unigene_29038	ATP-dependent RNA helicase DHX33	409.726	58.2414	0.142147	-2.81454	0.0781853	No	0.74141	No	Down
XP_011074832	CDS_35968_Unigene_55468	CDS_33080_Unigene_50405	SWI SNF complex subunit SWI3C	261.652	1420.38	5.42849	2.44055	0.0781996	No	0.74141	No	Up
XP_011077361	CDS_20096_Unigene_33238	CDS_27385_Unigene_42529	PREDICTED: uncharacterized protein LOC105161392	104.324	691.765	6.6309	2.7292	0.0780769	No	0.74141	No	Up
XP_011080963	CDS_40554_Unigene_64503	CDS_6846_Unigene_13011	PREDICTED: uncharacterized protein LOC105164097 isoform X1	12.6199	53.487	4.23831	2.08349	0.0779743	No	0.74141	No	Up
XP_011098487	CDS_20326_Unigene_33529	CDS_24266_Unigene_38196	deoxynucleoside triphosphate triphosphohydrolase SAMHD1 homolog	228.841	1286.06	5.61991	2.49055	0.0780108	No	0.74141	No	Up
XP_011100079	CDS_23519_Unigene_37981	CDS_13800_Unigene_23592	tRNA(His) guanylyltransferase 1-like	35.3357	230.588	6.52565	2.70612	0.0782385	No	0.74141	No	Up
XP_011102236	CDS_35281_Unigene_54598	CDS_28935_Unigene_44748	PREDICTED: uncharacterized protein LOC105180260 isoform X1	212.014	1213.56	5.72396	2.51701	0.078103	No	0.74141	No	Up
XP_011082158	CDS_927_Unigene_2189	CDS_705_Unigene_1614	methanol O-anthraniloyltransferase-like	6.73061	23.772	3.53192	1.82045	0.0783009	No	0.741539	No	Up
XP_011072773	CDS_5859_Unigene_12065	CDS_3634_Unigene_7335	PREDICTED: uncharacterized protein LOC105157934	43.749	299.527	6.8465	2.77537	0.0784873	No	0.742377	No	Up
XP_011077289	CDS_19570_Unigene_32554	CDS_23732_Unigene_37517	SHOOT GRAVITROPISM 6	337.372	1715.15	5.08386	2.34592	0.0784454	No	0.742377	No	Up
XP_012830572	CDS_8175_Unigene_16071	CDS_3567_Unigene_7202	PREDICTED: triadin-like	2709.07	615.695	0.227272	-2.13751	0.0785401	No	0.742415	No	Down
XP_011077538	CDS_28457_Unigene_44871	CDS_31536_Unigene_48348	AMP deaminase-like isoform X1	6666.67	1737.73	0.26066	-1.93976	0.0787112	No	0.742644	No	Down
XP_011094755	CDS_26921_Unigene_42644	CDS_20413_Unigene_32886	seven transmembrane domain-containing tyrosine- kinase 1-like	173.313	28.5264	0.164594	-2.60301	0.0787107	No	0.742644	No	Down
XP_012845633	CDS_4660_Unigene_9976	CDS_6665_Unigene_12656	sec-independent translocase chloroplastic	3292.95	790.419	0.240034	-2.05869	0.0786639	No	0.742644	No	Down
XP_011070480	CDS_39597_Unigene_61863	CDS_8318_Unigene_15431	DNA-damage-repair toleration DRT100	503.113	72.5046	0.144112	-2.79474	0.0787795	No	0.742827	No	Down
XP_011070642	CDS_6728_Unigene_13523	CDS_418_Unigene_910	pentatricopeptide repeat-containing mitochondrial	223.793	34.4694	0.154024	-2.69878	0.0794862	No	0.743177	No	Down
XP_011074011	CDS_14105_Unigene_24907	CDS_19104_Unigene_31126	probable uridine nucleosidase 2 isoform X1	1566.55	299.527	0.191202	-2.38683	0.079044	No	0.743177	No	Down
XP_011093563	CDS_10637_Unigene_19929	CDS_12263_Unigene_21335	nuclear pore complex NUP205 isoform X1	1291.44	231.777	0.179472	-2.47817	0.0793885	No	0.743177	No	Down
XP_012842909	CDS_7940_Unigene_15727	CDS_1134_Unigene_2439	PREDICTED: uncharacterized protein LOC105963087	95.0699	19.0176	0.200038	-2.32165	0.0793842	No	0.743177	No	Down
XP_012847649	CDS_35321_Unigene_54663	CDS_31730_Unigene_48612	probable methyltransferase PMT5	2719.17	621.638	0.228613	-2.12902	0.0793931	No	0.743177	No	Down
XP_009616647	CDS_32688_Unigene_50898	CDS_21941_Unigene_35044	vacuolar-sorting receptor 6-like	24.3985	134.312	5.50493	2.46072	0.0791078	No	0.743177	No	Up
XP_010253736	CDS_13874_Unigene_24553	CDS_296_Unigene_630	NF-X1-type zinc finger NFXL2	5.04796	16.6404	3.29646	1.72092	0.0794068	No	0.743177	No	Up
XP_011074454	CDS_4541_Unigene_9765	CDS_4421_Unigene_8624	probable carboxylesterase 2	212.856	1208.81	5.679	2.50564	0.0794683	No	0.743177	No	Up
XP_011077753	CDS_30752_Unigene_48074	CDS_28360_Unigene_43899	PREDICTED: syntaxin-132-like	453.475	2140.67	4.72059	2.23897	0.0789755	No	0.743177	No	Up
XP_011093596	CDS_28247_Unigene_44561	CDS_26925_Unigene_41897	PREDICTED: uncharacterized protein LOC105173522 isoform X2	47.1143	324.488	6.88725	2.78393	0.0788714	No	0.743177	No	Up
XP_011099594	CDS_13339_Unigene_23803	CDS_9650_Unigene_17484	gar2 isoform X1	99.2765	658.484	6.63283	2.72963	0.0793443	No	0.743177	No	Up
XP_012086855	CDS_29202_Unigene_45871	CDS_22757_Unigene_36154	serine arginine-rich splicing factor SR45a-like	188.457	1104.21	5.85921	2.55071	0.0789915	No	0.743177	No	Up
XP_012854180	CDS_22989_Unigene_37273	CDS_21839_Unigene_34907	nucleoside diphosphate kinase 3	342.42	1725.85	5.04015	2.33347	0.079502	No	0.743177	No	Up
XP_012857795	CDS_34015_Unigene_52852	CDS_19940_Unigene_32262	probable LRR receptor-like serine threonine- kinase At1g56130 isoform X1	509.002	2332.03	4.58158	2.19584	0.0794794	No	0.743177	No	Up
XP_011082815	CDS_8657_Unigene_16896	CDS_14324_Unigene_24328	PREDICTED: uncharacterized protein LOC105165486	832.913	131.935	0.158401	-2.65834	0.0795752	No	0.743404	No	Down
XP_011078226	CDS_30892_Unigene_48290	CDS_25367_Unigene_39758	ATP-dependent 6-phosphofructokinase 6	675.585	102.22	0.151305	-2.72447	0.0797329	No	0.744419	No	Down
XP_011101707	CDS_12450_Unigene_22580	CDS_6137_Unigene_11906	zinc finger CCCH domain-containing 55-like	913.68	148.575	0.162612	-2.6205	0.0799402	No	0.745795	No	Down
XP_011073991	CDS_16412_Unigene_28233	CDS_14830_Unigene_25061	BTB POZ and TAZ domain-containing 3	105.166	688.199	6.54395	2.71016	0.0800562	No	0.745795	No	Up
XP_011095563	CDS_25572_Unigene_40777	CDS_23894_Unigene_37727	far upstream element-binding 2 isoform X1	332.324	1683.06	5.06451	2.34042	0.0800768	No	0.745795	No	Up
XP_011096072	CDS_20574_Unigene_33884	CDS_13709_Unigene_23460	heat shock 70 kDa 16	246.509	1346.68	5.46303	2.4497	0.0799844	No	0.745795	No	Up
XP_012833966	CDS_25012_Unigene_40061	CDS_20895_Unigene_33604	FBD-associated F-box At5g56700 isoform X1	201.918	32.0922	0.158937	-2.65348	0.0801366	No	0.745894	No	Down
XP_011069653	CDS_27491_Unigene_43504	CDS_6911_Unigene_13128	PREDICTED: uncharacterized protein LOC105155475	111.896	21.3948	0.191202	-2.38683	0.0803887	No	0.746642	No	Down
XP_011072342	CDS_31304_Unigene_48838	CDS_22904_Unigene_36368	methyltransferase 22	121.151	22.5834	0.186407	-2.42347	0.0804548	No	0.746642	No	Down
XP_011073132	CDS_18412_Unigene_30942	CDS_2247_Unigene_4788	V-type proton ATPase subunit C-like	1558.98	300.716	0.192893	-2.37413	0.0807086	No	0.746642	No	Down
XP_011073919	CDS_33942_Unigene_52762	CDS_27793_Unigene_43094	CMP-sialic acid transporter 3-like	534.242	78.4476	0.146839	-2.76769	0.0805896	No	0.746642	No	Down
XP_011095518	CDS_11944_Unigene_21882	CDS_12963_Unigene_22408	DUF21 domain-containing chloroplastic isoform X1	1157.66	202.062	0.174543	-2.51835	0.0805192	No	0.746642	No	Down
XP_011101547	CDS_39822_Unigene_62639	CDS_4568_Unigene_8879	malate dehydrogenase [NADP] chloroplastic	9667.68	2548.36	0.263596	-1.9236	0.0803646	No	0.746642	No	Down
XP_002523528	CDS_10148_Unigene_19225	CDS_9643_Unigene_17472	conserved hypothetical protein	2561	9701.35	3.78812	1.92148	0.080609	No	0.746642	No	Up
XP_011079673	CDS_6025_Unigene_12331	CDS_920_Unigene_2101	phytochrome A-associated F-box	276.796	1463.17	5.28608	2.4022	0.0807727	No	0.746642	No	Up
XP_011087795	CDS_35512_Unigene_54909	CDS_29110_Unigene_44963	PREDICTED: uncharacterized protein LOC105169167	26.9224	153.329	5.69523	2.50975	0.0807106	No	0.746642	No	Up
XP_011095214	CDS_23644_Unigene_38153	CDS_14869_Unigene_25132	PREDICTED: uncharacterized protein LOC105174726	567.054	2517.45	4.43953	2.15041	0.0808035	No	0.746642	No	Up
XP_012831846	CDS_15845_Unigene_27374	CDS_34191_Unigene_51995	trichome birefringence-like 34	31.9704	197.308	6.17157	2.62564	0.0802861	No	0.746642	No	Up
XP_012837696	CDS_23960_Unigene_38572	CDS_11179_Unigene_19689	PREDICTED: apyrase-like	882.551	3568.18	4.04303	2.01544	0.0808071	No	0.746642	No	Up
XP_011077798	CDS_17967_Unigene_30349	CDS_11899_Unigene_20802	PREDICTED: uncharacterized protein LOC105161708	409.726	59.43	0.145048	-2.7854	0.0809679	No	0.747673	No	Down
XP_011082669	CDS_5664_Unigene_11748	CDS_8359_Unigene_15507	PREDICTED: thioredoxin	7646.81	27991.5	3.66055	1.87206	0.0811885	No	0.748673	No	Up
XP_011085977	CDS_33592_Unigene_52250	CDS_32520_Unigene_49669	shaggy-related kinase eta isoform X1	1347.8	5181.11	3.84411	1.94265	0.0812044	No	0.748673	No	Up
XP_011089619	CDS_6867_Unigene_13745	CDS_18600_Unigene_30425	probable sodium metabolite cotransporter chloroplastic	182.568	1064.99	5.83337	2.54433	0.0812242	No	0.748673	No	Up
XP_011071420	CDS_28070_Unigene_44318	CDS_28250_Unigene_43746	DAG chloroplastic	750.463	117.671	0.156798	-2.67302	0.0816515	No	0.749197	No	Down
XP_011072704	CDS_15825_Unigene_27348	CDS_16185_Unigene_27068	RING-H2 finger ATL3	229.682	35.658	0.155249	-2.68734	0.081622	No	0.749197	No	Down
XP_011081843	CDS_18979_Unigene_31700	CDS_3234_Unigene_6474	PREDICTED: uncharacterized protein LOC105164781	278.479	41.601	0.149386	-2.74288	0.0815466	No	0.749197	No	Down
XP_011082516	CDS_19061_Unigene_31830	CDS_19869_Unigene_32181	histone H2AX	1283.86	232.966	0.181457	-2.4623	0.0813777	No	0.749197	No	Down
XP_011070386	CDS_4904_Unigene_10444	CDS_246_Unigene_530	PREDICTED: uncharacterized protein LOC105156053	83.2913	557.453	6.69282	2.74261	0.0816524	No	0.749197	No	Up
XP_011088371	CDS_17927_Unigene_30289	CDS_12435_Unigene_21609	BURP domain-containing 3-like	15.9852	71.316	4.46138	2.15749	0.0818239	No	0.749197	No	Up
XP_011093897	CDS_34986_Unigene_54167	CDS_26933_Unigene_41910	1-phosphatidylinositol-3-phosphate 5-kinase FAB1A isoform X2	94.2285	621.638	6.59713	2.72184	0.0815032	No	0.749197	No	Up
XP_011095502	CDS_17181_Unigene_29304	CDS_14290_Unigene_24281	truncated FRIGIDA 1	184.25	1069.74	5.8059	2.53752	0.081744	No	0.749197	No	Up
XP_011096846	CDS_6511_Unigene_13103	CDS_10367_Unigene_18502	F-box FBD LRR-repeat At5g56420-like isoform X2	15.9852	71.316	4.46138	2.15749	0.0818239	No	0.749197	No	Up
XP_012839689	CDS_18696_Unigene_31316	CDS_5944_Unigene_11618	phagocyte signaling-impaired	192.664	1108.96	5.75596	2.52506	0.0814589	No	0.749197	No	Up
XP_012848157	CDS_23252_Unigene_37588	CDS_24010_Unigene_37931	pentatricopeptide repeat-containing At1g71210-like isoform X1	124.516	783.287	6.29064	2.65321	0.0817297	No	0.749197	No	Up
XP_011077030	CDS_19816_Unigene_32872	CDS_18259_Unigene_29935	PREDICTED: uncharacterized protein YKR070W-like isoform X2	653.71	99.8424	0.152732	-2.71093	0.0819399	No	0.749807	No	Down
XP_011085068	CDS_23074_Unigene_37379	CDS_19701_Unigene_31957	PREDICTED: uncharacterized protein LOC105167168	419.822	1988.53	4.7366	2.24385	0.0822758	No	0.752173	No	Up
XP_011092817	CDS_10449_Unigene_19685	CDS_7258_Unigene_13752	26S protease regulatory subunit S10B homolog B	2140.33	8042.07	3.75739	1.90973	0.0823084	No	0.752173	No	Up
XP_011094333	CDS_8917_Unigene_17322	CDS_12767_Unigene_22095	glucosamine 6-phosphate N-acetyltransferase	195.188	1114.91	5.71197	2.51399	0.082386	No	0.752173	No	Up
XP_012836105	CDS_31900_Unigene_49708	CDS_10208_Unigene_18279	ABC transporter G family member 39	299.512	1540.43	5.14312	2.36264	0.0823966	No	0.752173	No	Up
XP_011089373	CDS_29681_Unigene_46512	CDS_2769_Unigene_5685	mitogen-activated kinase 3	328.959	1652.15	5.02238	2.32837	0.0824588	No	0.752288	No	Up
XP_011076869	CDS_26184_Unigene_41629	CDS_17993_Unigene_29540	PREDICTED: uncharacterized protein LOC105161014 isoform X2	100.959	20.2062	0.200142	-2.3209	0.0826996	No	0.753579	No	Down
XP_012843075	CDS_10497_Unigene_19753	CDS_18455_Unigene_30220	lysine-specific demethylase JMJ706	388.693	57.0528	0.146781	-2.76826	0.0826675	No	0.753579	No	Down
XP_011071810	CDS_38087_Unigene_58337	CDS_33413_Unigene_50893	PREDICTED: LOW QUALITY PROTEIN: uncharacterized protein LOC105157180	337.372	49.9212	0.147971	-2.75662	0.0831267	No	0.753665	No	Down
XP_011077312	CDS_31547_Unigene_49183	CDS_23506_Unigene_37209	FAD synthase isoform X1	2435.64	549.133	0.225457	-2.14907	0.0829934	No	0.753665	No	Down
XP_011081743	CDS_38406_Unigene_58779	CDS_7914_Unigene_14784	amino acid permease 8-like isoform X2	457.681	67.7502	0.148029	-2.75605	0.083364	No	0.753665	No	Down
XP_011083948	CDS_19520_Unigene_32468	CDS_20590_Unigene_33154	PREDICTED: uncharacterized protein LOC105166332	2392.73	536.058	0.224036	-2.1582	0.0828498	No	0.753665	No	Down
XP_011099685	CDS_16608_Unigene_28475	CDS_14969_Unigene_25280	NAD-dependent deacetylase SRT2	540.973	80.8248	0.149406	-2.74269	0.0828405	No	0.753665	No	Down
XP_011101434	CDS_35219_Unigene_54512	CDS_32079_Unigene_49062	transport Sec61 subunit alpha-like	13906.3	3745.28	0.269323	-1.89259	0.0834041	No	0.753665	No	Down
XP_012830970	CDS_18541_Unigene_31108	CDS_11916_Unigene_20828	pentatricopeptide repeat-containing At2g15980	206.125	33.2808	0.161459	-2.63076	0.0834291	No	0.753665	No	Down
XP_012836950	CDS_9311_Unigene_17956	CDS_2453_Unigene_5165	PREDICTED: uncharacterized protein LOC105957564	127.04	23.772	0.187122	-2.41795	0.0837516	No	0.753665	No	Down
XP_012841165	CDS_39914_Unigene_62765	CDS_35955_Unigene_56322	acetylajmalan esterase-like	16919.1	4585.62	0.271033	-1.88346	0.0832481	No	0.753665	No	Down
XP_012842246	CDS_22317_Unigene_36400	CDS_21803_Unigene_34837	F-box At5g46170-like	1033.99	178.29	0.172429	-2.53592	0.0837447	No	0.753665	No	Down
XP_012854244	CDS_39144_Unigene_60725	CDS_6613_Unigene_12584	high mobility group B 6-like	3111.22	755.949	0.242975	-2.04112	0.0837238	No	0.753665	No	Down
XP_012855934	CDS_15742_Unigene_27226	CDS_1825_Unigene_3934	probable histone H2A variant 3	2876.49	683.445	0.237596	-2.07341	0.083498	No	0.753665	No	Down
XP_011070834	CDS_24733_Unigene_39678	CDS_23792_Unigene_37593	AP2 ERF and B3 domain-containing transcription factor RAV1-like	488.81	2221.49	4.54469	2.18418	0.0835864	No	0.753665	No	Up
XP_011075244	CDS_11279_Unigene_20896	CDS_9555_Unigene_17343	jmjC domain-containing 7	26.0811	142.632	5.46878	2.45122	0.0836057	No	0.753665	No	Up
XP_011076397	CDS_34633_Unigene_53713	CDS_5185_Unigene_10021	2-amino-3-ketobutyrate coenzyme A mitochondrial	103.483	666.804	6.44361	2.68787	0.0831279	No	0.753665	No	Up
XP_011084231	CDS_36070_Unigene_55579	CDS_32624_Unigene_49802	PREDICTED: uncharacterized protein LOC105166542 isoform X2	127.882	791.607	6.19016	2.62998	0.0837359	No	0.753665	No	Up
XP_011089074	CDS_31360_Unigene_48915	CDS_29549_Unigene_45557	E3 ubiquitin- ligase RNF4	184.25	1061.42	5.76074	2.52626	0.0832743	No	0.753665	No	Up
XP_011089861	CDS_15598_Unigene_27019	CDS_8860_Unigene_16324	interactor of constitutive active ROPs 3	2645.97	9895.09	3.73968	1.90292	0.0833762	No	0.753665	No	Up
XP_011090314	CDS_30885_Unigene_48278	CDS_24923_Unigene_39129	transcription factor E2FB	90.0219	589.545	6.54891	2.71126	0.0837148	No	0.753665	No	Up
XP_011093094	CDS_7083_Unigene_14119	CDS_9246_Unigene_16880	U11 U12 small nuclear ribonucleo 59 kDa isoform X1	56.3688	379.163	6.72647	2.74985	0.0834585	No	0.753665	No	Up
XP_011099221	CDS_38608_Unigene_59380	CDS_1785_Unigene_3859	PREDICTED: uncharacterized protein LOC105177681	24.3985	129.557	5.31006	2.40873	0.0832454	No	0.753665	No	Up
XP_011086752	CDS_34114_Unigene_52987	CDS_27684_Unigene_42944	4-coumarate-- ligase-like 9	41.225	267.435	6.48721	2.6976	0.0838553	No	0.754151	No	Up
XP_011081072	CDS_14355_Unigene_25261	CDS_14674_Unigene_24840	copper chaperone for superoxide chloroplastic cytosolic	370.183	1793.6	4.84516	2.27654	0.0839844	No	0.754865	No	Up
XP_012838652	CDS_7734_Unigene_15340	CDS_7895_Unigene_14745	PREDICTED: uncharacterized protein LOC105959155	91.7045	19.0176	0.207379	-2.26966	0.0840481	No	0.754991	No	Down
XP_011093215	CDS_38745_Unigene_59705	CDS_4074_Unigene_8065	pentatricopeptide repeat-containing mitochondrial	272.59	41.601	0.152614	-2.71204	0.0842178	No	0.755621	No	Down
XP_011077031	CDS_40164_Unigene_63634	CDS_34368_Unigene_52722	50S ribosomal chloroplastic	1929.16	7195.78	3.73001	1.89918	0.0842126	No	0.755621	No	Up
XP_011092838	CDS_37851_Unigene_58006	CDS_5_Unigene_11	kinesin KIF3A	1025.58	177.101	0.172685	-2.53379	0.0843197	No	0.756088	No	Down
XP_009592127	CDS_8928_Unigene_17335	CDS_35702_Unigene_55927	PREDICTED: uncharacterized protein LOC104089024	339.896	1674.74	4.92721	2.30077	0.0849244	No	0.761061	No	Up
XP_011076261	CDS_7206_Unigene_14359	CDS_8592_Unigene_15912	transcription factor TCP9	314.656	47.544	0.151098	-2.72644	0.0854073	No	0.76161	No	Down
XP_011093355	CDS_34552_Unigene_53603	CDS_28402_Unigene_43987	PREDICTED: uncharacterized protein LOC105173348	801.784	130.746	0.163069	-2.61645	0.0851852	No	0.76161	No	Down
XP_012849101	CDS_4720_Unigene_10088	CDS_2521_Unigene_5283	imidazole glycerol phosphate synthase chloroplastic	1124.85	200.873	0.178577	-2.48538	0.0854169	No	0.76161	No	Down
XP_011073835	CDS_353_Unigene_778	CDS_1839_Unigene_3952	PREDICTED: protein SHORT-ROOT-like	58.8928	391.049	6.64002	2.73119	0.0854275	No	0.76161	No	Up
XP_011075970	CDS_10538_Unigene_19795	CDS_14757_Unigene_24962	IQ-DOMAIN 1	1101.3	4233.79	3.84437	1.94275	0.0854372	No	0.76161	No	Up
XP_011081683	CDS_11250_Unigene_20841	CDS_9806_Unigene_17701	zinc transporter chloroplastic-like	315.497	1580.84	5.01062	2.32499	0.0852997	No	0.76161	No	Up
XP_011090229	CDS_2974_Unigene_6708	CDS_35684_Unigene_55910	pentatricopeptide repeat-containing chloroplastic	225.475	1227.82	5.44549	2.44506	0.0852237	No	0.76161	No	Up
XP_011093278	CDS_26733_Unigene_42418	CDS_16508_Unigene_27468	poly(rC)-binding 4-like	192.664	1088.76	5.65108	2.49853	0.0851326	No	0.76161	No	Up
XP_015389227	CDS_11148_Unigene_20680	CDS_6490_Unigene_12403	ribonuclease H At1g65750	12.6199	51.1098	4.04994	2.0179	0.0852213	No	0.76161	No	Up
XP_011081726	CDS_16563_Unigene_28419	CDS_4838_Unigene_9410	PREDICTED: LOW QUALITY PROTEIN: uncharacterized protein LOC105164705	143.867	26.1492	0.18176	-2.45989	0.0855332	No	0.761956	No	Down
XP_011096865	CDS_23476_Unigene_37914	CDS_15638_Unigene_26303	DDB1- and CUL4-associated factor 4	111.055	697.708	6.28254	2.65135	0.0855763	No	0.761956	No	Up
XP_011072004	CDS_39171_Unigene_60768	CDS_5978_Unigene_11667	leucine-rich repeat receptor-like serine threonine tyrosine- kinase SOBIR1	4878.01	1289.63	0.264376	-1.91933	0.0858626	No	0.76335	No	Down
XP_011081250	CDS_2147_Unigene_4856	CDS_11591_Unigene_20337	aspartic ase nepenthesin-1	838.802	139.066	0.165791	-2.59256	0.086054	No	0.76335	No	Down
XP_011082486	CDS_1834_Unigene_4319	CDS_7117_Unigene_13485	wee1 kinase	509.002	77.259	0.151785	-2.7199	0.0860058	No	0.76335	No	Down
XP_011087393	CDS_33302_Unigene_51819	CDS_29727_Unigene_45787	poly(rC)-binding 1	1336.87	253.172	0.189377	-2.40067	0.086085	No	0.76335	No	Down
XP_011101984	CDS_34392_Unigene_53356	CDS_26097_Unigene_40773	bifunctional mitochondrial isoform X2	1091.2	193.742	0.177549	-2.49371	0.0859254	No	0.76335	No	Down
XP_012856271	CDS_38371_Unigene_58737	CDS_2563_Unigene_5349	PREDICTED: uncharacterized protein At1g15400	296.147	45.1668	0.152515	-2.71298	0.08585	No	0.76335	No	Down
XP_011083834	CDS_14919_Unigene_26060	CDS_1076_Unigene_2326	APO chloroplastic isoform X1	729.43	2995.27	4.10632	2.03785	0.0859704	No	0.76335	No	Up
XP_011097400	CDS_6268_Unigene_12705	CDS_2507_Unigene_5265	lysine histidine transporter 1-like	379.438	57.0528	0.150361	-2.7335	0.0861387	No	0.763381	No	Down
XP_011073316	CDS_15461_Unigene_26819	CDS_6117_Unigene_11878	chaperone dnaJ chloroplastic-like isoform X1	992.765	3851.06	3.87913	1.95573	0.0863389	No	0.763818	No	Up
XP_011075230	CDS_31407_Unigene_48986	CDS_20370_Unigene_32818	probable galactinol--sucrose galactosyltransferase 2	6861.86	24638.5	3.59064	1.84424	0.0862951	No	0.763818	No	Up
XP_011095153	CDS_13363_Unigene_23823	CDS_9665_Unigene_17503	serine threonine- kinase chloroplastic	1162.71	4428.72	3.80896	1.9294	0.0863161	No	0.763818	No	Up
XP_011097425	CDS_29877_Unigene_46786	CDS_2113_Unigene_4530	ATP-dependent RNA helicase DB10	1046.61	184.233	0.176028	-2.50612	0.0864463	No	0.763878	No	Down
XP_011098074	CDS_32989_Unigene_51344	CDS_18761_Unigene_30661	probable galacturonosyltransferase 15 isoform X1	425.711	64.1844	0.15077	-2.72958	0.0864364	No	0.763878	No	Down
XP_011080856	CDS_38238_Unigene_58552	CDS_2555_Unigene_5334	PREDICTED: uncharacterized protein LOC105164011	258.287	40.4124	0.156463	-2.67611	0.0866247	No	0.764564	No	Down
XP_011073616	CDS_18481_Unigene_31046	CDS_23594_Unigene_37326	PREDICTED: uncharacterized protein LOC105158531	840.485	3347.1	3.98234	1.99362	0.0866074	No	0.764564	No	Up
XP_011076792	CDS_7155_Unigene_14259	CDS_6111_Unigene_11869	phosphatase 2C 37-like	120.31	740.498	6.15493	2.62174	0.0868248	No	0.76544	No	Up
XP_011077318	CDS_14727_Unigene_25818	CDS_7841_Unigene_14659	ABC transporter B family member 1	188.457	1061.42	5.63216	2.49369	0.0868097	No	0.76544	No	Up
XP_011089553	CDS_14722_Unigene_25812	CDS_9033_Unigene_16598	calcium uniporter mitochondrial-like	811.88	134.312	0.165433	-2.59568	0.086926	No	0.765443	No	Down
XP_011098853	CDS_20196_Unigene_33359	CDS_20499_Unigene_33019	probable inactive leucine-rich repeat receptor kinase At3g03770	1967.02	424.33	0.215722	-2.21275	0.0868981	No	0.765443	No	Down
XP_011088959	CDS_1418_Unigene_3123	CDS_187_Unigene_438	aluminum-activated malate transporter 2-like	151.439	27.3378	0.180521	-2.46977	0.0870991	No	0.766175	No	Down
XP_011082023	CDS_12094_Unigene_22076	CDS_14453_Unigene_24502	PREDICTED: uncharacterized protein At1g32220, chloroplastic isoform X2	129.564	785.664	6.0639	2.60025	0.0871101	No	0.766175	No	Up
XP_011077485	CDS_21708_Unigene_35532	CDS_2681_Unigene_5541	probable E3 ubiquitin- ligase LOG2	2067.14	454.045	0.219649	-2.18673	0.0874649	No	0.768331	No	Down
XP_011088334	CDS_24826_Unigene_39774	CDS_27409_Unigene_42552	TIC chloroplastic	1834.09	6752.44	3.68163	1.88034	0.0875071	No	0.768331	No	Up
XP_011100856	CDS_27198_Unigene_43077	CDS_1691_Unigene_3725	probable phosphatase 2C 50	201.077	1112.53	5.53285	2.46802	0.0875031	No	0.768331	No	Up
XP_011081771	CDS_31663_Unigene_49371	CDS_28916_Unigene_44709	monoglyceride lipase	167.424	962.766	5.75047	2.52368	0.0876347	No	0.768563	No	Up
XP_012843656	CDS_22003_Unigene_35976	CDS_15534_Unigene_26140	serine arginine-rich splicing factor RS40-like isoform X2	154.804	904.524	5.84303	2.54672	0.0876244	No	0.768563	No	Up
XP_012852659	CDS_12294_Unigene_22331	CDS_9714_Unigene_17567	late blight resistance homolog R1B-16	466.936	71.316	0.152732	-2.71093	0.0878053	No	0.769614	No	Down
XP_011100583	CDS_32797_Unigene_51092	CDS_29426_Unigene_45379	PREDICTED: uncharacterized protein LOC105178745	937.237	161.65	0.172475	-2.53554	0.0878582	No	0.769633	No	Down
XP_011077437	CDS_9839_Unigene_18721	CDS_5104_Unigene_9870	ABC transporter G family member 21	630.995	2654.14	4.20629	2.07255	0.0879184	No	0.769717	No	Up
XP_011095699	CDS_20226_Unigene_33386	CDS_7061_Unigene_13393	molybdenum cofactor sulfurase isoform X1	85.8153	550.322	6.41286	2.68097	0.0881342	No	0.771162	No	Up
XP_011084325	CDS_21416_Unigene_35138	CDS_26185_Unigene_40888	GATA transcription factor 8	616.692	97.4652	0.158045	-2.66159	0.0884669	No	0.771752	No	Down
XP_011092868	CDS_4218_Unigene_9211	CDS_4817_Unigene_9355	PREDICTED: snakin-2	5296.99	1426.32	0.26927	-1.89288	0.088452	No	0.771752	No	Down
XP_011097714	CDS_33274_Unigene_51778	CDS_29854_Unigene_45985	histone-lysine N-methyltransferase ASHR1	508.161	78.4476	0.154375	-2.69548	0.0885576	No	0.771752	No	Down
XP_012828743	CDS_36790_Unigene_56545	CDS_3248_Unigene_6503	conserved oligomeric Golgi complex subunit 1	96.7525	20.2062	0.208844	-2.2595	0.0883048	No	0.771752	No	Down
XP_012834207	CDS_5301_Unigene_11163	CDS_15093_Unigene_25471	kelch domain-containing 4	1894.67	407.69	0.215178	-2.2164	0.0885351	No	0.771752	No	Down
XP_012841364	CDS_28707_Unigene_45176	CDS_11428_Unigene_20069	thyroid adenoma-associated homolog	140.501	26.1492	0.186113	-2.42575	0.088408	No	0.771752	No	Down
XP_011083517	CDS_37739_Unigene_57863	CDS_33447_Unigene_50934	5 -3 exoribonuclease 3 isoform X5	139.66	829.643	5.94044	2.57057	0.0883418	No	0.771752	No	Up
XP_012844174	CDS_5316_Unigene_11185	CDS_36295_Unigene_57242	pentatricopeptide repeat-containing chloroplastic	95.0699	600.243	6.3137	2.65849	0.0887765	No	0.772773	No	Up
XP_012854813	CDS_28123_Unigene_44399	CDS_12018_Unigene_20988	PREDICTED: uncharacterized protein ycf45 isoform X2	259.97	1345.49	5.17558	2.37172	0.0887752	No	0.772773	No	Up
XP_012842685	CDS_27220_Unigene_43117	CDS_24393_Unigene_38380	40S ribosomal S15-1-like	3747.27	13586.9	3.62581	1.8583	0.0888875	No	0.773296	No	Up
XP_011079879	CDS_296_Unigene_637	CDS_11803_Unigene_20662	F-box kelch-repeat SKIP30	145.549	854.603	5.87157	2.55375	0.0890623	No	0.774373	No	Up
XP_012852894	CDS_5836_Unigene_12031	CDS_11765_Unigene_20602	late blight resistance homolog R1A-3	12.6199	49.9212	3.95575	1.98395	0.0892616	No	0.775661	No	Up
XP_010260734	CDS_10840_Unigene_20232	CDS_3644_Unigene_7358	cationic amino acid transporter 5-like	891.806	153.329	0.171931	-2.5401	0.089367	No	0.776133	No	Down
XP_011091791	CDS_5000_Unigene_10626	CDS_6840_Unigene_13004	pentatricopeptide repeat-containing At4g20740	19.3505	87.9564	4.54543	2.18442	0.0894557	No	0.776459	No	Up
XP_011090586	CDS_27059_Unigene_42832	CDS_10995_Unigene_19397	EMBRYONIC FLOWER 1 isoform X1	176.678	30.9036	0.174914	-2.51528	0.0895703	No	0.776566	No	Down
XP_011099592	CDS_32581_Unigene_50745	CDS_31217_Unigene_47930	DNA-directed RNA polymerase III subunit RPC5	2143.7	481.383	0.224557	-2.15485	0.0895528	No	0.776566	No	Down
XP_011089170	CDS_6605_Unigene_13281	CDS_1388_Unigene_3177	beta-amyrin 28-oxidase-like	121.151	23.772	0.196218	-2.34947	0.0896298	No	0.776638	No	Down
XP_011071599	CDS_15789_Unigene_27306	CDS_16135_Unigene_26984	PREDICTED: uncharacterized protein LOC105157007	873.297	149.764	0.171492	-2.54378	0.0897925	No	0.776718	No	Down
XP_012845240	CDS_4592_Unigene_9844	CDS_10265_Unigene_18355	PREDICTED: glutaredoxin-C3-like	1305.74	250.795	0.192071	-2.38029	0.0897277	No	0.776718	No	Down
XP_012842174	CDS_2560_Unigene_5940	CDS_7475_Unigene_14096	probable methyltransferase PMT17	27.7638	148.575	5.3514	2.41992	0.0897869	No	0.776718	No	Up
XP_011088521	CDS_601_Unigene_1340	CDS_35221_Unigene_54753	auxin-induced 15A-like	524.987	82.0134	0.15622	-2.67835	0.089915	No	0.777335	No	Down
XP_011075142	CDS_2946_Unigene_6671	CDS_11070_Unigene_19517	PREDICTED: uncharacterized protein LOC105159683	1150.09	212.759	0.184993	-2.43446	0.0900734	No	0.777578	No	Down
XP_011074306	CDS_10413_Unigene_19625	CDS_3092_Unigene_6220	receptor kinase HSL1	346.626	1662.85	4.79724	2.26221	0.0900089	No	0.777578	No	Up
XP_011094505	CDS_29869_Unigene_46776	CDS_25975_Unigene_40592	PREDICTED: uncharacterized protein LOC105174183	47.1143	298.339	6.33223	2.66271	0.0900968	No	0.777578	No	Up
XP_011095612	CDS_5791_Unigene_11962	CDS_54_Unigene_119	probable galactinol--sucrose galactosyltransferase 1	3020.36	752.384	0.249104	-2.00518	0.0902752	No	0.778675	No	Down
XP_011088925	CDS_26927_Unigene_42654	CDS_23729_Unigene_37513	OTU domain-containing 5 isoform X1	124.516	747.629	6.00427	2.58599	0.0903518	No	0.778893	No	Up
XP_011093669	CDS_5684_Unigene_11783	CDS_4433_Unigene_8642	inositol oxygenase 2-like	5142.19	1394.23	0.271135	-1.88292	0.0905335	No	0.779066	No	Down
XP_012831314	CDS_35962_Unigene_55460	CDS_31396_Unigene_48173	ADP-ribosylation factor 1	556.958	87.9564	0.157923	-2.66271	0.0905771	No	0.779066	No	Down
XP_012857276	CDS_35404_Unigene_54774	CDS_24334_Unigene_38292	nuclear pore complex NUP93A	147.232	27.3378	0.185678	-2.42912	0.0905764	No	0.779066	No	Down
XP_012858344	CDS_17304_Unigene_29444	CDS_23940_Unigene_37802	short-chain dehydrogenase TIC chloroplastic-like isoform X2	189.298	1045.97	5.5255	2.4661	0.0905722	No	0.779066	No	Up
XP_011094128	CDS_37300_Unigene_57255	CDS_12280_Unigene_21375	calcium-transporting ATPase plasma membrane-type isoform X2	659.6	106.974	0.16218	-2.62433	0.090664	No	0.779372	No	Down
XP_011087266	CDS_2313_Unigene_5248	CDS_279_Unigene_601	vesicle transport v-SNARE 13-like	97.5938	607.374	6.22349	2.63772	0.0907279	No	0.779479	No	Up
XP_011071579	CDS_38164_Unigene_58466	CDS_3507_Unigene_7040	PREDICTED: uncharacterized protein LOC105156993	1269.56	243.663	0.191927	-2.38137	0.0911288	No	0.781455	No	Down
XP_011088579	CDS_26745_Unigene_42432	CDS_19372_Unigene_31494	methyltransferase 16 homolog isoform X2	62.2581	398.181	6.39564	2.67709	0.0911561	No	0.781455	No	Up
XP_011090928	CDS_5566_Unigene_11585	CDS_9568_Unigene_17360	GTP-binding chloroplastic	1779.4	6461.23	3.63112	1.86041	0.0910436	No	0.781455	No	Up
XP_012834710	CDS_19809_Unigene_32866	CDS_18256_Unigene_29933	PREDICTED: uncharacterized protein YKR070W-like	72.354	461.177	6.37389	2.67217	0.0911637	No	0.781455	No	Up
XP_011096677	CDS_66_Unigene_136	CDS_3709_Unigene_7476	kxDL motif-containing 1	334.848	52.2984	0.156186	-2.67867	0.0912212	No	0.781506	No	Down
XP_011094992	CDS_2122_Unigene_4790	CDS_30783_Unigene_47303	RNA polymerase II C-terminal domain phosphatase-like 2	94.2285	587.168	6.23132	2.63954	0.0912976	No	0.78172	No	Up
XP_011096945	CDS_28132_Unigene_44408	CDS_10939_Unigene_19333	thaumatin 1	296.147	1467.92	4.95673	2.30939	0.0913693	No	0.781892	No	Up
XP_012853916	CDS_12448_Unigene_22578	CDS_11445_Unigene_20099	activating signal cointegrator 1 complex subunit 3 isoform X2	342.42	53.487	0.156203	-2.67851	0.0914408	No	0.782063	No	Down
XP_011093461	CDS_12045_Unigene_22008	CDS_13866_Unigene_23673	probable serine threonine- kinase At4g35230	2640.08	638.278	0.241765	-2.04833	0.0917611	No	0.783919	No	Down
XP_011090015	CDS_23890_Unigene_38479	CDS_9989_Unigene_17971	alkaline neutral invertase CINV1	107.69	657.296	6.1036	2.60966	0.0917453	No	0.783919	No	Up
XP_011082819	CDS_30726_Unigene_48040	CDS_29220_Unigene_45125	calnexin homolog 1	10941.4	3039.25	0.277774	-1.84802	0.0919238	No	0.784868	No	Down
XP_011070268	CDS_27273_Unigene_43196	CDS_31718_Unigene_48582	PREDICTED: uncharacterized protein LOC105155968	188.457	1035.27	5.4934	2.4577	0.0920033	No	0.785105	No	Up
XP_011087678	CDS_27065_Unigene_42841	CDS_26667_Unigene_41574	leucine-rich repeat receptor-like serine threonine- kinase BAM3	66.4648	421.953	6.34852	2.66642	0.092242	No	0.786258	No	Up
XP_011092870	CDS_29558_Unigene_46343	CDS_13100_Unigene_22596	5 -methylthioadenosine S-adenosylhomocysteine nucleosidase 1-like	1240.96	4586.81	3.69619	1.88604	0.0922086	No	0.786258	No	Up
XP_011084742	CDS_5112_Unigene_10816	CDS_306_Unigene_647	GDSL esterase lipase At4g10955-like	228.841	38.0352	0.166208	-2.58894	0.0923616	No	0.786835	No	Down
XP_011087639	CDS_7959_Unigene_15757	CDS_3800_Unigene_7646	PREDICTED: uncharacterized protein At5g08430	488.81	77.259	0.158055	-2.6615	0.0926546	No	0.788889	No	Down
XP_011078544	CDS_107_Unigene_244	CDS_1943_Unigene_4121	PREDICTED: uncharacterized protein LOC105162245	23.5571	114.106	4.84378	2.27613	0.0927635	No	0.789374	No	Up
XP_011071772	CDS_25087_Unigene_40147	CDS_1383_Unigene_3154	transcription factor MYB1R1	1446.24	292.396	0.202176	-2.30631	0.0929122	No	0.790047	No	Down
XP_012842090	CDS_38021_Unigene_58243	CDS_16380_Unigene_27305	probable leucine-rich repeat receptor kinase At1g35710	36.177	210.382	5.81535	2.53987	0.0929467	No	0.790047	No	Up
XP_011075824	CDS_24894_Unigene_39883	CDS_17639_Unigene_29114	pentatricopeptide repeat-containing chloroplastic	1866.9	410.067	0.219651	-2.18672	0.0932197	No	0.790597	No	Down
XP_011090306	CDS_39934_Unigene_62802	CDS_35589_Unigene_55436	lipid-binding At4g00165	8244.15	2298.75	0.278834	-1.84252	0.0931294	No	0.790597	No	Down
XP_012858601	CDS_6354_Unigene_12861	CDS_19446_Unigene_31607	PREDICTED: uncharacterized protein LOC105977774	2630.83	639.467	0.243067	-2.04058	0.0930654	No	0.790597	No	Down
XP_011093938	CDS_37539_Unigene_57607	CDS_25046_Unigene_39300	probable starch synthase chloroplastic amyloplastic isoform X1	334.848	1598.67	4.77431	2.25529	0.0931689	No	0.790597	No	Up
XP_011094329	CDS_16518_Unigene_28363	CDS_7471_Unigene_14094	1-(5-phosphoribosyl)-5-[(5-phosphoribosylamino)methylideneamino] imidazole-4-carboxamide chloroplastic	195.188	1057.85	5.41968	2.43821	0.0932968	No	0.790809	No	Up
XP_011079613	CDS_35383_Unigene_54742	CDS_18925_Unigene_30881	PREDICTED: kinesin-4-like	1145.89	216.325	0.188784	-2.40519	0.0937009	No	0.793513	No	Down
XP_012828346	CDS_32745_Unigene_51012	CDS_27119_Unigene_42160	PREDICTED: uncharacterized protein LOC105949590	611.644	99.8424	0.163236	-2.61497	0.0937204	No	0.793513	No	Down
XP_011073693	CDS_5445_Unigene_11379	CDS_4134_Unigene_8161	formin 6	320.545	51.1098	0.159446	-2.64886	0.0940382	No	0.795002	No	Down
XP_011090783	CDS_24017_Unigene_38640	CDS_24604_Unigene_38681	ATP-dependent (S)-NAD(P)H-hydrate dehydratase isoform X1	1495.88	307.847	0.205797	-2.28071	0.0941504	No	0.795002	No	Down
XP_011094185	CDS_38260_Unigene_58577	CDS_33875_Unigene_51530	ubiquitin carboxyl-terminal hydrolase 12 isoform X3	1177.86	224.645	0.190724	-2.39044	0.0940472	No	0.795002	No	Down
XP_011072723	CDS_31065_Unigene_48542	CDS_23722_Unigene_37496	RNA-binding with multiple partial	461.047	2033.69	4.41104	2.14112	0.0941552	No	0.795002	No	Up
XP_011099550	CDS_32346_Unigene_50417	CDS_24285_Unigene_38217	mannose-6-phosphate isomerase 2-like	642.773	2627.99	4.08852	2.03158	0.0942105	No	0.795002	No	Up
XP_012834245	CDS_21525_Unigene_35316	CDS_13837_Unigene_23635	PREDICTED: uncharacterized protein LOC105955094 isoform X1	395.423	1806.67	4.56896	2.19186	0.0941946	No	0.795002	No	Up
XP_012830689	CDS_11598_Unigene_21321	CDS_11128_Unigene_19621	PREDICTED: uncharacterized protein LOC105951782	3638.74	962.766	0.264588	-1.91818	0.0943185	No	0.79503	No	Down
XP_011098823	CDS_14636_Unigene_25697	CDS_13574_Unigene_23273	chaperone dnaJ mitochondrial isoform X1	42.0663	253.172	6.0184	2.58938	0.0943025	No	0.79503	No	Up
XP_011099344	CDS_15356_Unigene_26663	CDS_10649_Unigene_18904	apoptosis 1 inhibitor-like	71.5127	16.6404	0.232691	-2.10351	0.0944454	No	0.795658	No	Down
XP_012842693	CDS_10159_Unigene_19246	CDS_20643_Unigene_33236	probable alpha-mannosidase I MNS4 isoform X1	26.0811	130.746	5.01305	2.32569	0.0945431	No	0.796039	No	Up
XP_011093236	CDS_33131_Unigene_51566	CDS_31205_Unigene_47907	plasminogen activator inhibitor 1 RNA-binding -like isoform X1	4745.08	16678.4	3.51489	1.81348	0.0946448	No	0.796454	No	Up
XP_011099626	CDS_32540_Unigene_50688	CDS_6604_Unigene_12571	zinc-finger homeodomain 6	722.699	122.426	0.169401	-2.56149	0.0947912	No	0.797244	No	Down
XP_012828455	CDS_38291_Unigene_58613	CDS_20076_Unigene_32443	PREDICTED: uncharacterized protein LOC105949683	1717.15	370.843	0.215965	-2.21113	0.0949316	No	0.797646	No	Down
XP_012828085	CDS_10097_Unigene_19125	CDS_12160_Unigene_21166	ABC transporter A family member 1	144.708	826.077	5.70857	2.51313	0.0949441	No	0.797646	No	Up
XP_012845022	CDS_20614_Unigene_33933	CDS_22299_Unigene_35516	probable LRR receptor-like serine threonine- kinase At1g07650	30.2877	161.65	5.33713	2.41606	0.0950803	No	0.798349	No	Up
XP_011074846	CDS_38856_Unigene_59871	CDS_7865_Unigene_14697	TLC domain-containing 2	233.047	39.2238	0.168308	-2.57082	0.0952002	No	0.798472	No	Down
XP_012849987	CDS_16744_Unigene_28687	CDS_21516_Unigene_34470	lupeol synthase-like	962.477	174.724	0.181536	-2.46167	0.0951578	No	0.798472	No	Down
XP_011093187	CDS_40014_Unigene_62954	CDS_34214_Unigene_52024	glyoxylate hydroxypyruvate reductase HPR3	116.103	23.772	0.204749	-2.28807	0.0953215	No	0.798607	No	Down
XP_011096272	CDS_8447_Unigene_16526	CDS_3784_Unigene_7596	PREDICTED: uncharacterized protein LOC105175517	250.715	41.601	0.165929	-2.59136	0.095296	No	0.798607	No	Down
XP_011099287	CDS_35213_Unigene_54502	CDS_32478_Unigene_49605	translation initiation factor eIF-2B subunit delta-like isoform X2	35.3357	199.685	5.65108	2.49853	0.0956097	No	0.800138	No	Up
XP_012849115	CDS_8378_Unigene_16417	CDS_3362_Unigene_6692	tryptophan synthase beta chain 1	35.3357	199.685	5.65108	2.49853	0.0956097	No	0.800138	No	Up
XP_015077202	CDS_21900_Unigene_35847	CDS_16614_Unigene_27628	PREDICTED: uncharacterized protein At1g04910-like	108.531	647.787	5.96868	2.57741	0.0957606	No	0.80096	No	Up
XP_009378158	CDS_34472_Unigene_53466	CDS_8297_Unigene_15403	PREDICTED: uncharacterized protein LOC103966690	195.188	34.4694	0.176596	-2.50147	0.0960817	No	0.801312	No	Down
XP_011071190	CDS_38625_Unigene_59543	CDS_4916_Unigene_9544	kinase D-interacting substrate of 220 kDa	355.881	57.0528	0.160314	-2.64103	0.0958912	No	0.801312	No	Down
XP_011086180	CDS_1774_Unigene_4194	CDS_253_Unigene_544	cytochrome P450 77A3-like	1261.15	248.417	0.196977	-2.3439	0.0960503	No	0.801312	No	Down
XP_011093583	CDS_9328_Unigene_17971	CDS_15989_Unigene_26796	PREDICTED: uncharacterized protein LOC105173515 isoform X2	450.951	72.5046	0.160782	-2.63683	0.0961195	No	0.801312	No	Down
XP_012845030	CDS_37282_Unigene_57222	CDS_31118_Unigene_47785	probable alpha,alpha-trehalose-phosphate synthase [UDP-forming] 7	763.924	131.935	0.172706	-2.53361	0.0960422	No	0.801312	No	Down
XP_011073314	CDS_16922_Unigene_28943	CDS_19993_Unigene_32326	probable phosphatase 2C 60 isoform X3	611.644	2512.7	4.10811	2.03847	0.0959129	No	0.801312	No	Up
XP_011073863	CDS_1280_Unigene_2782	CDS_3949_Unigene_7891	ribonucleases P MRP subunit POP1	456.84	73.6932	0.161311	-2.63209	0.0965578	No	0.802534	No	Down
XP_011075044	CDS_39203_Unigene_60813	CDS_35803_Unigene_56054	glutamate dehydrogenase B	3600.03	960.389	0.266772	-1.90632	0.0966361	No	0.802534	No	Down
XP_011080941	CDS_12560_Unigene_22730	CDS_19558_Unigene_31758	probable aquaporin PIP-type pTOM75	512.368	83.202	0.162387	-2.62249	0.096412	No	0.802534	No	Down
XP_011085736	CDS_31035_Unigene_48491	CDS_23406_Unigene_37051	PREDICTED: uncharacterized protein LOC105167642 isoform X1	1734.81	379.163	0.218561	-2.19389	0.0966074	No	0.802534	No	Down
XP_011097409	CDS_40338_Unigene_63873	CDS_6992_Unigene_13262	glycosylphosphatidylinositol anchor attachment 1	1033.15	192.553	0.186375	-2.42372	0.0965423	No	0.802534	No	Down
XP_012827534	CDS_40173_Unigene_63642	CDS_1908_Unigene_4058	PREDICTED: uncharacterized protein LOC105948842	909.474	164.027	0.180354	-2.4711	0.0964693	No	0.802534	No	Down
XP_012845534	CDS_21741_Unigene_35575	CDS_9635_Unigene_17453	probable RNA-dependent RNA polymerase 5	122.834	716.726	5.83493	2.54472	0.0964069	No	0.802534	No	Up
XP_010436634	CDS_15437_Unigene_26784	CDS_4192_Unigene_8245	PLASMODESMATA CALLOSE-BINDING PROTEIN 1-like	298.671	48.7326	0.163165	-2.6156	0.0967683	No	0.802975	No	Down
XP_011084686	CDS_27298_Unigene_43236	CDS_2858_Unigene_5848	chromatin assembly factor 1 subunit FAS1-like	314.656	51.1098	0.162431	-2.6221	0.0968467	No	0.802975	No	Down
XP_011096915	CDS_15650_Unigene_27089	CDS_5265_Unigene_10178	PREDICTED: LOW QUALITY PROTEIN: uncharacterized protein LOC105175967	338.213	54.6756	0.16166	-2.62896	0.0968914	No	0.802975	No	Down
XP_011101344	CDS_3133_Unigene_7025	CDS_21166_Unigene_33997	probable mediator of RNA polymerase II transcription subunit 26c	100.959	604.997	5.9925	2.58316	0.0969008	No	0.802975	No	Up
XP_011073171	CDS_5203_Unigene_10957	CDS_14708_Unigene_24892	notum homolog isoform X1	264.176	43.9782	0.166473	-2.58664	0.0974023	No	0.803737	No	Down
XP_011082986	CDS_37624_Unigene_57722	CDS_27436_Unigene_42594	aspartate mitochondrial isoform X1	3676.6	987.726	0.268652	-1.89619	0.0973829	No	0.803737	No	Down
XP_011088030	CDS_39164_Unigene_60756	CDS_2698_Unigene_5570	PREDICTED: uncharacterized protein LOC105169345	797.577	140.255	0.175851	-2.50757	0.0974692	No	0.803737	No	Down
XP_011102032	CDS_4375_Unigene_9470	CDS_11201_Unigene_19722	WD repeat-containing 43	1133.27	217.514	0.191935	-2.38131	0.0971718	No	0.803737	No	Down
XP_012831490	CDS_13755_Unigene_24384	CDS_1248_Unigene_2759	PREDICTED: uncharacterized protein LOC105952475	344.944	55.8642	0.161952	-2.62637	0.0973582	No	0.803737	No	Down
XP_011078947	CDS_8850_Unigene_17219	CDS_2315_Unigene_4914	pentatricopeptide repeat-containing At5g66520-like	111.055	654.918	5.89724	2.56004	0.0974432	No	0.803737	No	Up
XP_011093340	CDS_39805_Unigene_62616	CDS_13796_Unigene_23584	receptor kinase HSL1	24.3985	116.483	4.77419	2.25525	0.0970478	No	0.803737	No	Up
XP_011094328	CDS_1309_Unigene_2832	CDS_1752_Unigene_3817	PREDICTED: uncharacterized protein LOC105174061	51.3209	312.602	6.09112	2.60671	0.0972768	No	0.803737	No	Up
XP_012858303	CDS_19055_Unigene_31819	CDS_16070_Unigene_26899	uncharacterized Rho GTPase-activating At5g61530 isoform X1	84.1326	512.286	6.08904	2.60621	0.0974659	No	0.803737	No	Up
XP_011083413	CDS_16075_Unigene_27711	CDS_15727_Unigene_26417	probable serine threonine- kinase drkD	461.047	74.8818	0.162417	-2.62223	0.0976072	No	0.804438	No	Down
XP_011076214	CDS_6980_Unigene_13918	CDS_7935_Unigene_14821	probable methyltransferase PMT15	366.818	59.43	0.162015	-2.6258	0.0977826	No	0.805446	No	Down
XP_011097215	CDS_30647_Unigene_47926	CDS_28684_Unigene_44369	G-box-binding factor 1-like isoform X2	410.567	66.5616	0.162121	-2.62486	0.0979547	No	0.806427	No	Down
XP_011081762	CDS_1343_Unigene_2915	CDS_2149_Unigene_4606	lachrymatory-factor synthase	21.8745	98.6538	4.50999	2.17313	0.098153	No	0.807621	No	Up
XP_009621469	CDS_40037_Unigene_62988	CDS_5045_Unigene_9773	PREDICTED: uncharacterized protein LOC104113081	1055.02	199.685	0.189271	-2.40148	0.0982661	No	0.808114	No	Down
XP_012832868	CDS_19727_Unigene_32750	CDS_3744_Unigene_7532	mitochondrial substrate carrier family ucpB isoform X3	105.166	22.5834	0.214741	-2.21933	0.0989272	No	0.812669	No	Down
XP_012856880	CDS_27996_Unigene_44221	CDS_28789_Unigene_44522	purple acid phosphatase 17-like	1531.21	325.676	0.212692	-2.23316	0.0989196	No	0.812669	No	Down
XP_011098840	CDS_22579_Unigene_36720	CDS_16464_Unigene_27411	ribulose-1,5 bisphosphate carboxylase oxygenase large subunit N- chloroplastic	3096.92	808.248	0.260984	-1.93797	0.0989995	No	0.812824	No	Down
XP_012854940	CDS_22151_Unigene_36199	CDS_21556_Unigene_34516	PREDICTED: uncharacterized protein LOC105974390	1056.71	3867.7	3.66015	1.8719	0.0992295	No	0.814272	No	Up
XP_012850311	CDS_16409_Unigene_28226	CDS_20588_Unigene_33147	PREDICTED: uncharacterized protein LOC105970075	651.186	2601.84	3.99555	1.99839	0.0996935	No	0.817638	No	Up
XP_011069974	CDS_7254_Unigene_14466	CDS_1819_Unigene_3921	xylosyltransferase 1	25.2398	120.049	4.75632	2.24985	0.0998061	No	0.818119	No	Up
XP_011101879	CDS_27533_Unigene_43556	CDS_22698_Unigene_36082	small RNA degrading nuclease 5 isoform X2	198.553	35.658	0.179589	-2.47723	0.0999625	No	0.818802	No	Down
XP_011090339	CDS_36405_Unigene_56033	CDS_33220_Unigene_50604	proline--tRNA ligase	2949.69	10281.4	3.48558	1.8014	0.100051	No	0.818802	No	Up
XP_011095848	CDS_35198_Unigene_54474	CDS_32057_Unigene_49032	sodium hydrogen exchanger 6-like isoform X2	83.2913	500.4	6.00784	2.58685	0.100024	No	0.818802	No	Up
XP_011099092	CDS_13430_Unigene_23910	CDS_7908_Unigene_14770	probable LRR receptor-like serine threonine- kinase At4g37250	1075.21	206.816	0.192349	-2.3782	0.100233	No	0.819851	No	Down
XP_011098560	CDS_30936_Unigene_48348	CDS_27677_Unigene_42933	xylosyltransferase 1-like	199.394	1042.4	5.22784	2.38622	0.10031	No	0.820034	No	Up
XP_011096796	CDS_37117_Unigene_57023	CDS_31048_Unigene_47696	PREDICTED: uncharacterized protein LOC105175870	1827.36	413.633	0.226355	-2.14334	0.100395	No	0.82029	No	Down
XP_011099301	CDS_3339_Unigene_7397	CDS_12483_Unigene_21691	PREDICTED: uncharacterized protein LOC105177754 isoform X2	439.172	72.5046	0.165094	-2.59864	0.100705	No	0.822383	No	Down
XP_011074635	CDS_29283_Unigene_45996	CDS_27894_Unigene_43225	uncharacterized TPR repeat-containing At1g05150-like	1408.38	294.773	0.209299	-2.25636	0.100893	No	0.822584	No	Down
XP_012839822	CDS_3127_Unigene_7016	CDS_36424_Unigene_57510	integumentary mucin -like	188.457	34.4694	0.182903	-2.45085	0.100857	No	0.822584	No	Down
XP_012827917	CDS_40441_Unigene_64061	CDS_35957_Unigene_56331	metallothionein 1	162.376	881.941	5.43148	2.44134	0.100874	No	0.822584	No	Up
XP_012841874	CDS_9363_Unigene_18038	CDS_19488_Unigene_31669	probable LRR receptor-like serine threonine- kinase At1g56140	2654.38	9225.91	3.47573	1.79731	0.10097	No	0.822776	No	Up
XP_004244151	CDS_31792_Unigene_49558	CDS_26973_Unigene_41969	translation factor SUI1 homolog	4047.62	1120.85	0.276916	-1.85248	0.101172	No	0.82372	No	Down
XP_011071398	CDS_9050_Unigene_17522	CDS_16698_Unigene_27764	PREDICTED: uncharacterized protein LOC105156856 isoform X2	424.028	70.1274	0.165384	-2.59611	0.101195	No	0.82372	No	Down
XP_011090735	CDS_15928_Unigene_27501	CDS_6574_Unigene_12542	probable linoleate 9S-lipoxygenase 5 isoform X2	461.888	1981.4	4.28977	2.1009	0.101285	No	0.824011	No	Up
XP_011071393	CDS_13675_Unigene_24252	CDS_16767_Unigene_27864	outer envelope pore 16- chloroplastic-like	35.3357	191.365	5.41562	2.43713	0.101423	No	0.824695	No	Up
XP_011099456	CDS_6217_Unigene_12625	CDS_627_Unigene_1401	probable beta-D-xylosidase 6	1594.31	348.26	0.218439	-2.1947	0.101644	No	0.826046	No	Down
XP_009796591	CDS_3378_Unigene_7457	CDS_34451_Unigene_52826	PREDICTED: protein Simiate	628.471	108.163	0.172104	-2.53864	0.101804	No	0.826908	No	Down
XP_011077894	CDS_10954_Unigene_20398	CDS_3340_Unigene_6659	pentatricopeptide repeat-containing At1g68930	62.2581	15.4518	0.248189	-2.01049	0.102081	No	0.828712	No	Down
XP_011093628	CDS_32056_Unigene_49954	CDS_15731_Unigene_26424	ROOT PRIMORDIUM DEFECTIVE 1	671.378	2641.07	3.9338	1.97592	0.102198	No	0.829221	No	Up
XP_012852263	CDS_12885_Unigene_23148	CDS_19836_Unigene_32141	K(+) efflux antiporter 5	169.107	32.0922	0.189775	-2.39764	0.102308	No	0.829669	No	Down
XP_011070009	CDS_27753_Unigene_43879	CDS_16149_Unigene_27014	phosphatidylinositol N-acetylglucosaminyltransferase subunit A-like	60.5755	361.334	5.96503	2.57653	0.102422	No	0.830145	No	Up
XP_011092602	CDS_1970_Unigene_4534	CDS_11881_Unigene_20773	cell division cycle cofactor of APC complex-like	238.095	41.601	0.174724	-2.51685	0.10266	No	0.831589	No	Down
XP_011095920	CDS_4222_Unigene_9221	CDS_6539_Unigene_12494	microtubule-associated 70-5 isoform X2	95.9112	561.019	5.84936	2.54828	0.102709	No	0.831589	No	Up
XP_011091516	CDS_6683_Unigene_13432	CDS_1101_Unigene_2372	PREDICTED: uncharacterized protein LOC105171939 isoform X1	95.0699	21.3948	0.225043	-2.15173	0.102797	No	0.831858	No	Down
XP_011091265	CDS_26499_Unigene_42076	CDS_25108_Unigene_39400	PREDICTED: uncharacterized protein LOC105171752 isoform X1	447.585	74.8818	0.167302	-2.57948	0.102855	No	0.831877	No	Down
XP_012841310	CDS_7402_Unigene_14747	CDS_15396_Unigene_25923	3-dehydrosphinganine reductase TSC10A-like	63.0995	375.598	5.95247	2.57349	0.102964	No	0.831877	No	Up
XP_012853589	CDS_10999_Unigene_20464	CDS_10296_Unigene_18399	WD repeat domain-containing 83	132.93	741.686	5.57954	2.48015	0.102911	No	0.831877	No	Up
XP_011100001	CDS_32760_Unigene_51040	CDS_29130_Unigene_44988	ubiquitin carboxyl-terminal hydrolase 17-like	70.6714	419.576	5.93699	2.56973	0.103412	No	0.835055	No	Up
XP_012830071	CDS_36504_Unigene_56173	CDS_25788_Unigene_40346	G-type lectin S-receptor-like serine threonine- kinase At4g03230 isoform X2	1392.39	4883.96	3.50759	1.81048	0.103562	No	0.835815	No	Up
XP_011091944	CDS_37496_Unigene_57538	CDS_18222_Unigene_29883	PREDICTED: remorin-like	461.888	1963.57	4.25117	2.08786	0.103717	No	0.836626	No	Up
XP_012845602	CDS_27559_Unigene_43596	CDS_25567_Unigene_40033	PREDICTED: uncharacterized protein LOC105965585 isoform X1	339.054	57.0528	0.16827	-2.57115	0.10378	No	0.836689	No	Down
XP_011081204	CDS_36327_Unigene_55941	CDS_32547_Unigene_49715	monocopper oxidase SKU5	4078.75	1144.62	0.280631	-1.83326	0.104256	No	0.838747	No	Down
XP_011079124	CDS_2864_Unigene_6502	CDS_21470_Unigene_34407	PREDICTED: uncharacterized protein LOC105162718	264.176	1276.56	4.83221	2.27268	0.104176	No	0.838747	No	Up
XP_011086630	CDS_14611_Unigene_25667	CDS_7467_Unigene_14079	ABC transporter B family member chloroplastic isoform X1	243.985	1200.49	4.92033	2.29876	0.104218	No	0.838747	No	Up
XP_011089852	CDS_23774_Unigene_38300	CDS_29620_Unigene_45653	ethylene-responsive transcription factor RAP2-7	80.7673	475.44	5.88654	2.55742	0.104099	No	0.838747	No	Up
XP_011076015	CDS_30073_Unigene_47080	CDS_6072_Unigene_11809	cyclic nucleotide-gated ion channel 1	927.983	175.913	0.189565	-2.39924	0.104446	No	0.839385	No	Down
XP_011088266	CDS_3306_Unigene_7326	CDS_6510_Unigene_12443	leucine-rich repeat receptor-like serine threonine- kinase At2g14440 isoform X1	116.944	24.9606	0.21344	-2.2281	0.104426	No	0.839385	No	Down
XP_011075575	CDS_11486_Unigene_21181	CDS_3341_Unigene_6661	PREDICTED: remorin	671.378	118.86	0.177039	-2.49786	0.104767	No	0.840428	No	Down
XP_011083479	CDS_6497_Unigene_13085	CDS_8208_Unigene_15255	PREDICTED: uncharacterized protein LOC105166004	191.822	35.658	0.185891	-2.42747	0.104853	No	0.840428	No	Down
XP_011094784	CDS_31374_Unigene_48938	CDS_27629_Unigene_42872	serine arginine-rich splicing factor RS2Z32-like	1935.89	455.234	0.235155	-2.08832	0.104799	No	0.840428	No	Down
XP_012827494	CDS_3711_Unigene_8021	CDS_31_Unigene_89	PREDICTED: myosin-2-like	191.822	35.658	0.185891	-2.42747	0.104853	No	0.840428	No	Down
XP_011090685	CDS_24237_Unigene_38968	CDS_6771_Unigene_12875	serine threonine- kinase HT1-like	192.664	994.858	5.1637	2.36841	0.104769	No	0.840428	No	Up
XP_011093400	CDS_2248_Unigene_5062	CDS_1485_Unigene_3412	mitochondrial chaperone BCS1-like	1299.85	271.001	0.208486	-2.26198	0.104938	No	0.84067	No	Down
XP_011077591	CDS_30616_Unigene_47868	CDS_1981_Unigene_4249	UPF0503 chloroplastic-like	853.105	159.272	0.186697	-2.42123	0.105319	No	0.842826	No	Down
XP_011079683	CDS_20908_Unigene_34330	CDS_8818_Unigene_16261	DNA mismatch repair PMS1 isoform X1	703.349	125.992	0.179131	-2.48091	0.10531	No	0.842826	No	Down
XP_011072194	CDS_10781_Unigene_20150	CDS_14831_Unigene_25062	phosphatidylinositol glycan anchor biosynthesis class U -like	913.68	173.536	0.18993	-2.39646	0.105497	No	0.843807	No	Down
XP_011093954	CDS_36117_Unigene_55651	CDS_9490_Unigene_17239	beta-glucosidase 12-like	274.272	47.544	0.173346	-2.52827	0.105583	No	0.84405	No	Down
XP_011069909	CDS_20946_Unigene_34395	CDS_13447_Unigene_23120	probable mitochondrial chaperone BCS1-B	506.478	86.7678	0.171316	-2.54527	0.105698	No	0.844098	No	Down
XP_011095588	CDS_1572_Unigene_3486	CDS_8032_Unigene_14992	probable LRR receptor-like serine threonine- kinase At4g26540	1667.51	376.786	0.225958	-2.14588	0.1057	No	0.844098	No	Down
XP_011073028	CDS_18677_Unigene_31291	CDS_21008_Unigene_33754	nuclear transcription factor Y subunit C-1	4057.72	1148.19	0.282964	-1.82131	0.106519	No	0.846102	No	Down
XP_011074150	CDS_25228_Unigene_40328	CDS_20066_Unigene_32430	ATP synthase delta chloroplastic-like	34052.7	10323	0.303148	-1.72191	0.106579	No	0.846102	No	Down
XP_011077382	CDS_27628_Unigene_43714	CDS_12171_Unigene_21183	PREDICTED: uncharacterized protein LOC105161407	240.619	42.7896	0.177831	-2.49142	0.10633	No	0.846102	No	Down
XP_011087503	CDS_6328_Unigene_12815	CDS_10992_Unigene_19394	pentatricopeptide repeat-containing At3g62890-like	303.719	52.2984	0.172193	-2.5379	0.106501	No	0.846102	No	Down
XP_011089658	CDS_23666_Unigene_38171	CDS_27617_Unigene_42857	palmitoyl- thioesterase 1	498.906	85.5792	0.171534	-2.54344	0.106137	No	0.846102	No	Down
XP_011094663	CDS_2264_Unigene_5112	CDS_3050_Unigene_6149	PREDICTED: uncharacterized protein LOC105174308	980.145	190.176	0.194028	-2.36566	0.106292	No	0.846102	No	Down
XP_012837233	CDS_31741_Unigene_49478	CDS_4377_Unigene_8546	lysine histidine transporter-like 8	296.147	51.1098	0.172583	-2.53464	0.10646	No	0.846102	No	Down
XP_011073797	CDS_17371_Unigene_29545	CDS_7660_Unigene_14375	methyltransferase 13 isoform X1	725.223	2764.68	3.81218	1.93062	0.106541	No	0.846102	No	Up
XP_011076758	CDS_5415_Unigene_11334	CDS_35397_Unigene_55045	7-deoxyloganetic acid glucosyltransferase-like	735.319	2794.4	3.80025	1.9261	0.10662	No	0.846102	No	Up
XP_011080593	CDS_30320_Unigene_47456	CDS_18408_Unigene_30150	CBS domain-containing mitochondrial-like	9292.45	30695.6	3.30328	1.7239	0.106277	No	0.846102	No	Up
XP_012842028	CDS_13244_Unigene_23658	CDS_20977_Unigene_33721	chloride channel CLC- partial	360.088	1604.61	4.45616	2.1558	0.106364	No	0.846102	No	Up
XP_012856371	CDS_24398_Unigene_39191	CDS_6060_Unigene_11794	PREDICTED: uncharacterized protein LOC105975705	222.951	1110.15	4.97935	2.31596	0.106206	No	0.846102	No	Up
XP_011088617	CDS_16580_Unigene_28442	CDS_2531_Unigene_5302	pre-mRNA-splicing factor syf2	2379.27	599.054	0.251781	-1.98976	0.106906	No	0.847443	No	Down
XP_011096503	CDS_30651_Unigene_47931	CDS_5031_Unigene_9751	coatomer subunit zeta-1-like	4439.68	1270.61	0.286195	-1.80493	0.106956	No	0.847443	No	Down
XP_012837712	CDS_15680_Unigene_27127	CDS_13459_Unigene_23136	ATP-dependent Clp protease proteolytic subunit-related chloroplastic	724.382	2758.74	3.80841	1.92919	0.106906	No	0.847443	No	Up
XP_011087251	CDS_2578_Unigene_5974	CDS_5670_Unigene_11078	pentatricopeptide repeat-containing At1g74630	39.5423	213.948	5.41061	2.43579	0.10708	No	0.847981	No	Up
XP_011089729	CDS_10009_Unigene_18989	CDS_1838_Unigene_3951	PREDICTED: uncharacterized protein LOC105170598	79.0847	19.0176	0.240471	-2.05606	0.107245	No	0.848845	No	Down
XP_011079310	CDS_16020_Unigene_27621	CDS_3843_Unigene_7726	PREDICTED: uncharacterized protein LOC105162855	2003.2	6807.11	3.39812	1.76474	0.107418	No	0.849772	No	Up
XP_011084722	CDS_38802_Unigene_59788	CDS_4727_Unigene_9149	PREDICTED: uncharacterized protein LOC105166900	196.87	36.8466	0.187162	-2.41764	0.107481	No	0.84983	No	Down
XP_011071618	CDS_11831_Unigene_21703	CDS_994_Unigene_2207	PREDICTED: uncharacterized protein LOC105157022	921.252	178.29	0.19353	-2.36937	0.108656	No	0.849872	No	Down
XP_011072956	CDS_31142_Unigene_48620	CDS_18714_Unigene_30582	ATP-dependent helicase hrq1 isoform X2	398.789	68.9388	0.172871	-2.53224	0.109214	No	0.849872	No	Down
XP_011074301	CDS_2301_Unigene_5224	CDS_7478_Unigene_14102	receptor kinase HAIKU2	4901.57	1426.32	0.290993	-1.78095	0.109047	No	0.849872	No	Down
XP_011076143	CDS_20811_Unigene_34191	CDS_23927_Unigene_37773	PREDICTED: uncharacterized protein LOC105160463 isoform X1	768.972	142.632	0.185484	-2.43063	0.108372	No	0.849872	No	Down
XP_011078912	CDS_35034_Unigene_54238	CDS_29439_Unigene_45397	transcription initiation factor IIB-2-like	1197.21	247.229	0.206505	-2.27575	0.107877	No	0.849872	No	Down
XP_011091367	CDS_6995_Unigene_13950	CDS_398_Unigene_868	probable folate-biopterin transporter chloroplastic	72.354	17.829	0.246413	-2.02085	0.108176	No	0.849872	No	Down
XP_011092525	CDS_3587_Unigene_7809	CDS_7521_Unigene_14158	upstream activation factor subunit spp27-like	2602.22	676.313	0.259898	-1.94398	0.108435	No	0.849872	No	Down
XP_011092667	CDS_37633_Unigene_57736	CDS_31664_Unigene_48541	ATP-dependent helicase BRM isoform X2	1138.31	232.966	0.204658	-2.28871	0.108956	No	0.849872	No	Down
XP_011097868	CDS_7127_Unigene_14205	CDS_13351_Unigene_22976	flavonol synthase flavanone 3-hydroxylase	145.549	29.715	0.204157	-2.29225	0.1086	No	0.849872	No	Down
XP_011098600	CDS_32380_Unigene_50459	CDS_26866_Unigene_41806	probable receptor kinase At5g15080	1204.78	250.795	0.208166	-2.26419	0.1091	No	0.849872	No	Down
XP_011099423	CDS_29334_Unigene_46061	CDS_19945_Unigene_32268	E3 ubiquitin- ligase FANCL isoform X3	236.413	42.7896	0.180995	-2.46598	0.109047	No	0.849872	No	Down
XP_011100819	CDS_14193_Unigene_25027	CDS_13750_Unigene_23528	major allergen Mal d 1-like	1016.32	200.873	0.197647	-2.339	0.108096	No	0.849872	No	Down
XP_011101556	CDS_1971_Unigene_4535	CDS_9510_Unigene_17272	molybdopterin synthase sulfur carrier subunit	812.721	152.141	0.187199	-2.41735	0.10785	No	0.849872	No	Down
XP_012828180	CDS_35032_Unigene_54236	CDS_29437_Unigene_45392	transcription initiation factor IIB-2-like	1707.05	394.615	0.231168	-2.11299	0.109014	No	0.849872	No	Down
XP_012840699	CDS_25274_Unigene_40394	CDS_25535_Unigene_39984	serine threonine- kinase HT1-like	308.767	53.487	0.173228	-2.52926	0.10787	No	0.849872	No	Down
XP_012849265	CDS_27634_Unigene_43722	CDS_2146_Unigene_4600	PREDICTED: uncharacterized protein LOC105969080	465.253	80.8248	0.173722	-2.52515	0.109222	No	0.849872	No	Down
XP_012851609	CDS_1458_Unigene_3169	CDS_4437_Unigene_8647	ferruginol synthase-like	285.21	49.9212	0.175033	-2.5143	0.108297	No	0.849872	No	Down
XP_011072176	CDS_26749_Unigene_42436	CDS_21283_Unigene_34161	ferric reduction oxidase partial	15.1439	57.0528	3.76738	1.91356	0.10827	No	0.849872	No	Up
XP_011076241	CDS_20455_Unigene_33717	CDS_2539_Unigene_5312	post-GPI attachment to s factor 3	986.034	3525.39	3.57532	1.83807	0.108756	No	0.849872	No	Up
XP_011078818	CDS_2609_Unigene_6021	CDS_3725_Unigene_7499	trichome birefringence-like	1171.13	4107.8	3.50757	1.81047	0.107881	No	0.849872	No	Up
XP_011081838	CDS_26253_Unigene_41734	CDS_28624_Unigene_44304	serine threonine- kinase AFC3 isoform X1	70.6714	406.501	5.75199	2.52406	0.109168	No	0.849872	No	Up
XP_011083116	CDS_424_Unigene_948	CDS_3069_Unigene_6184	3-ketoacyl- thiolase peroxisomal	1834.93	6212.81	3.38585	1.75952	0.109176	No	0.849872	No	Up
XP_011089332	CDS_33958_Unigene_52784	CDS_27459_Unigene_42630	E3 SUMO- ligase SIZ1-like isoform X2	67.3061	389.861	5.79235	2.53415	0.10791	No	0.849872	No	Up
XP_011092895	CDS_11741_Unigene_21540	CDS_3273_Unigene_6564	probable transporter mch1	6136.63	20309.6	3.30957	1.72664	0.108605	No	0.849872	No	Up
XP_011097598	CDS_595_Unigene_1319	CDS_21740_Unigene_34764	PREDICTED: uncharacterized protein LOC105176481	79.0847	455.234	5.75628	2.52514	0.10848	No	0.849872	No	Up
XP_011099411	CDS_16976_Unigene_29007	CDS_21128_Unigene_33933	growth-regulating factor 1-like	985.193	3518.26	3.57113	1.83638	0.109145	No	0.849872	No	Up
XP_011099607	CDS_20007_Unigene_33143	CDS_26620_Unigene_41524	random slug 5	478.715	1989.72	4.15637	2.05532	0.107775	No	0.849872	No	Up
XP_011100548	CDS_12489_Unigene_22642	CDS_9523_Unigene_17294	aspartic ase nepenthesin-2-like	40.3837	217.514	5.38618	2.42926	0.10874	No	0.849872	No	Up
XP_011101915	CDS_14447_Unigene_25425	CDS_9270_Unigene_16909	F-box SKP2A-like	98.4352	556.265	5.65108	2.49853	0.109037	No	0.849872	No	Up
XP_012845134	CDS_20027_Unigene_33168	CDS_12247_Unigene_21307	probable rhamnogalacturonate lyase B	35.3357	181.856	5.14652	2.3636	0.108853	No	0.849872	No	Up
XP_012851360	CDS_15976_Unigene_27565	CDS_25350_Unigene_39733	pre-mRNA-processing ATP-dependent RNA helicase prp5	75.7194	438.593	5.79235	2.53415	0.1076	No	0.849872	No	Up
XP_011069555	CDS_8534_Unigene_16707	CDS_2322_Unigene_4927	ethylene-responsive transcription factor ERF014	23.5571	102.22	4.33922	2.11744	0.109315	No	0.85016	No	Up
XP_011087554	CDS_6698_Unigene_13453	CDS_1307_Unigene_2923	L-cysteine desulfhydrase 1	451.792	78.4476	0.173636	-2.52586	0.109396	No	0.850357	No	Down
XP_011100526	CDS_1782_Unigene_4211	CDS_36252_Unigene_57175	1,4-alpha-glucan-branching enzyme-like isoform X1	2725.9	9175.99	3.36623	1.75113	0.109567	No	0.851245	No	Up
XP_011091630	CDS_4055_Unigene_8857	CDS_4491_Unigene_8725	N-lysine methyltransferase METTL21A	349.15	60.6186	0.173617	-2.52602	0.109667	No	0.851591	No	Down
XP_012838754	CDS_9827_Unigene_18702	CDS_36112_Unigene_57003	subtilisin-like protease isoform X1	3945.82	13192.3	3.34335	1.7413	0.109781	No	0.85204	No	Up
XP_011074097	CDS_22783_Unigene_36976	CDS_26052_Unigene_40714	BTB POZ domain-containing At2g30600	2584.55	675.125	0.261215	-1.93669	0.110063	No	0.852421	No	Down
XP_011100190	CDS_3700_Unigene_8007	CDS_6850_Unigene_13016	7-deoxyloganetin glucosyltransferase-like	830.389	158.084	0.190373	-2.3931	0.110111	No	0.852421	No	Down
XP_011100939	CDS_272_Unigene_582	CDS_36111_Unigene_57001	B-box zinc finger 19-like	1278.82	272.189	0.212845	-2.23213	0.110031	No	0.852421	No	Down
XP_011085420	CDS_7750_Unigene_15365	CDS_2107_Unigene_4526	probable glycosyltransferase At3g07620 isoform X1	13.4612	48.7326	3.62022	1.85608	0.110035	No	0.852421	No	Up
XP_011100758	CDS_27910_Unigene_44121	CDS_23541_Unigene_37245	probable serine threonine- kinase DDB_G0282963 isoform X2	276.796	1293.2	4.67202	2.22404	0.110085	No	0.852421	No	Up
XP_011087129	CDS_13842_Unigene_24510	CDS_3481_Unigene_6971	PREDICTED: uncharacterized protein LOC105168696	354.198	1561.82	4.40945	2.1406	0.110276	No	0.853264	No	Up
XP_011090426	CDS_31626_Unigene_49312	CDS_27827_Unigene_43127	zinc finger CCCH domain-containing 44-like isoform X1	2244.66	564.585	0.251524	-1.99123	0.110452	No	0.854192	No	Down
XP_012830565	CDS_26616_Unigene_42258	CDS_21881_Unigene_34959	pyruvate dehydrogenase E1 component subunit beta- mitochondrial	675.585	123.614	0.182974	-2.45029	0.110576	No	0.854415	No	Down
XP_011077574	CDS_11408_Unigene_21082	CDS_15765_Unigene_26475	tRNA (cytidine(32) guanosine(34)-2 -O)-methyltransferase	144.708	767.835	5.3061	2.40765	0.110819	No	0.854415	No	Up
XP_011077956	CDS_15579_Unigene_26989	CDS_26460_Unigene_41286	inactive kinase SELMODRAFT_444075	174.996	897.393	5.12808	2.35842	0.110773	No	0.854415	No	Up
XP_011085541	CDS_31217_Unigene_48738	CDS_31191_Unigene_47867	DA1-related 1-like	225.475	1099.45	4.87616	2.28575	0.110812	No	0.854415	No	Up
XP_011087426	CDS_23996_Unigene_38620	CDS_29455_Unigene_45417	heparan-alpha-glucosaminide N-acetyltransferase isoform X1	300.353	1374.02	4.57468	2.19367	0.11068	No	0.854415	No	Up
XP_012850698	CDS_23079_Unigene_37387	CDS_27077_Unigene_42114	peptidyl-prolyl cis-trans isomerase chloroplastic	768.131	2855.02	3.71684	1.89408	0.110607	No	0.854415	No	Up
XP_011082099	CDS_2850_Unigene_6477	CDS_34574_Unigene_53005	PREDICTED: uncharacterized protein LOC105164948	34.4944	173.536	5.03084	2.3308	0.110961	No	0.854742	No	Up
XP_011098929	CDS_24609_Unigene_39495	CDS_24477_Unigene_38476	probable S-acyltransferase 7	1405.01	4798.38	3.41518	1.77196	0.110974	No	0.854742	No	Up
XP_011089243	CDS_35322_Unigene_54664	CDS_23288_Unigene_36883	glycine--tRNA ligase chloroplastic mitochondrial	4390.04	1276.56	0.290785	-1.78198	0.111469	No	0.857686	No	Down
XP_011099438	CDS_32245_Unigene_50272	CDS_26913_Unigene_41878	probable starch synthase chloroplastic amyloplastic isoform X3	885.916	172.347	0.194541	-2.36185	0.11143	No	0.857686	No	Down
XP_011081321	CDS_12329_Unigene_22392	CDS_658_Unigene_1484	PREDICTED: uncharacterized protein LOC105164378	42.9076	11.886	0.277014	-1.85197	0.111704	No	0.858079	No	Down
XP_011091178	CDS_4767_Unigene_10186	CDS_12631_Unigene_21907	SWI SNF-related matrix-associated actin-dependent regulator of chromatin subfamily A member 3-like 3	1098.77	225.834	0.205533	-2.28256	0.111746	No	0.858079	No	Down
XP_011075360	CDS_26701_Unigene_42371	CDS_20460_Unigene_32952	PREDICTED: uncharacterized protein LOC105159854	77.402	438.593	5.66643	2.50244	0.111643	No	0.858079	No	Up
XP_011082481	CDS_10213_Unigene_19318	CDS_12908_Unigene_22327	chaperone dnaJ chloroplastic	613.327	2381.95	3.88366	1.95742	0.111723	No	0.858079	No	Up
XP_011088630	CDS_2327_Unigene_5284	CDS_5467_Unigene_10612	PREDICTED: uncharacterized protein LOC105169807	575.467	103.408	0.179694	-2.47638	0.111888	No	0.858732	No	Down
XP_011077709	CDS_33190_Unigene_51652	CDS_24186_Unigene_38114	PREDICTED: uncharacterized protein LOC105161652	1645.63	381.541	0.23185	-2.10874	0.112005	No	0.859193	No	Down
XP_012848759	CDS_39103_Unigene_60664	CDS_34429_Unigene_52799	TIC 20- chloroplastic	265.018	1240.9	4.68232	2.22722	0.112113	No	0.859592	No	Up
XP_011093211	CDS_29723_Unigene_46565	CDS_27780_Unigene_43070	peptidyl-prolyl cis-trans isomerase FKBP43-like isoform X1	519.94	92.7108	0.178311	-2.48753	0.112576	No	0.861397	No	Down
XP_011099783	CDS_5928_Unigene_12171	CDS_2164_Unigene_4634	PREDICTED: protein TONSOKU	680.633	125.992	0.185109	-2.43355	0.112508	No	0.861397	No	Down
XP_011081531	CDS_27804_Unigene_43967	CDS_23232_Unigene_36812	heparanase 3	162.376	837.963	5.16063	2.36755	0.112557	No	0.861397	No	Up
XP_011101747	CDS_4769_Unigene_10188	CDS_19799_Unigene_32103	alcohol dehydrogenase 1	84.1326	473.063	5.62282	2.49129	0.112481	No	0.861397	No	Up
XP_011085016	CDS_9759_Unigene_18600	CDS_35535_Unigene_55302	ultraviolet-B receptor UVR8 isoform X1	70.6714	17.829	0.25228	-1.9869	0.11271	No	0.861994	No	Down
XP_012833474	CDS_1337_Unigene_2898	CDS_20801_Unigene_33459	PREDICTED: uncharacterized protein LOC105954344	36.177	183.044	5.05969	2.33905	0.112778	No	0.862073	No	Up
XP_011083567	CDS_11949_Unigene_21889	CDS_36025_Unigene_56523	filament-like plant 7 isoform X2	133.771	28.5264	0.213248	-2.22939	0.112868	No	0.862329	No	Down
XP_011086698	CDS_4422_Unigene_9539	CDS_16306_Unigene_27212	oxysterol-binding -related 1D-like	2985.03	820.134	0.274749	-1.86381	0.113367	No	0.86571	No	Down
XP_011074014	CDS_18395_Unigene_30925	CDS_16527_Unigene_27497	pentatricopeptide repeat-containing At1g76280 isoform X1	559.482	101.031	0.18058	-2.46929	0.113478	No	0.865908	No	Down
XP_011073868	CDS_28974_Unigene_45507	CDS_23211_Unigene_36783	purple acid phosphatase 23	58.8928	329.242	5.59053	2.48299	0.113508	No	0.865908	No	Up
XP_011082756	CDS_8726_Unigene_17013	CDS_18641_Unigene_30487	TPR repeat-containing thioredoxin TTL1-like	3301.36	928.296	0.281186	-1.8304	0.113595	No	0.86614	No	Down
XP_011070375	CDS_17843_Unigene_30185	CDS_17947_Unigene_29488	PREDICTED: uncharacterized protein LOC105156044	441.696	78.4476	0.177605	-2.49325	0.11378	No	0.86668	No	Down
XP_011084839	CDS_26571_Unigene_42179	CDS_25727_Unigene_40263	potassium transporter 2	3394.75	960.389	0.282904	-1.82162	0.113741	No	0.86668	No	Down
XP_011089245	CDS_36644_Unigene_56393	CDS_3417_Unigene_6823	cell division cycle 48 homolog	3354.37	947.314	0.282412	-1.82413	0.113896	No	0.866691	No	Down
XP_011074817	CDS_23872_Unigene_38451	CDS_14949_Unigene_25246	PREDICTED: uncharacterized protein LOC105159446	227.999	1095.89	4.80654	2.265	0.113879	No	0.866691	No	Up
XP_011075204	CDS_12802_Unigene_23035	CDS_10441_Unigene_18608	DNA-directed RNA polymerase I subunit rpa1	446.744	79.6362	0.178259	-2.48795	0.114389	No	0.868279	No	Down
XP_011082732	CDS_12228_Unigene_22245	CDS_6810_Unigene_12959	PREDICTED: uncharacterized protein LOC105165426	625.947	115.294	0.184192	-2.44072	0.114267	No	0.868279	No	Down
XP_011089737	CDS_3602_Unigene_7832	CDS_884_Unigene_2049	probable polyamine transporter At3g13620	952.381	191.365	0.200933	-2.31522	0.114448	No	0.868279	No	Down
XP_002527348	CDS_8792_Unigene_17135	CDS_2299_Unigene_4886	conserved hypothetical protein	191.822	952.068	4.96328	2.31129	0.114484	No	0.868279	No	Up
[truncated: 13,182 more rows]

## Sheet: Upregulated
id	CONTROL_CDS_ID	DROUGHT_CDS_ID	Description	Control_baseMean	Drought_baseMean	foldChange	log2FoldChange	pval	Significance	padj	Significance	Regulation
XP_011099029	CDS_10144_Unigene_19218	CDS_32039_Unigene_49003	receptor kinase FERONIA	13.4612	6394.67	475.044	8.89192	3.88544e-09	Yes	2.71583e-05	Yes	Up
XP_011070630	CDS_1509_Unigene_3276	CDS_8379_Unigene_15535	auxin efflux carrier component 7-like	23.5571	6209.25	263.582	8.04211	3.24797e-08	Yes	6.16343e-05	Yes	Up
XP_012833351	CDS_12051_Unigene_22012	CDS_30734_Unigene_47226	ATP synthase subunit mitochondrial	40.3837	7565.44	187.339	7.54951	8.17748e-08	Yes	0.000107041	Yes	Up
XP_011094724	CDS_8482_Unigene_16602	CDS_16732_Unigene_27822	probable LRR receptor-like serine threonine- kinase At1g67720	36.177	5372.47	148.505	7.21437	3.4911e-07	Yes	0.000311755	Yes	Up
XP_011075655	CDS_2526_Unigene_5868	CDS_2926_Unigene_5955	auxin efflux carrier component 7-like	29.4464	4643.86	157.705	7.30109	4.21432e-07	Yes	0.000355431	Yes	Up
XP_011069870	CDS_2772_Unigene_6354	CDS_1831_Unigene_3945	EIN3-binding F-box 1	81.6086	8874.09	108.74	6.76473	5.66352e-07	Yes	0.000452515	Yes	Up
XP_011081428	CDS_2552_Unigene_5919	CDS_33897_Unigene_51559	pre-mRNA-processing-splicing factor 8	148.915	13583.3	91.2154	6.51121	1.04037e-06	Yes	0.000686686	Yes	Up
XP_011075207	CDS_21712_Unigene_35539	CDS_25931_Unigene_40528	neutral alpha-glucosidase C	29.4464	4023.41	136.635	7.09418	1.15031e-06	Yes	0.000727617	Yes	Up
XP_011083298	CDS_16276_Unigene_28044	CDS_1099_Unigene_2369	polyphenol oxidase chloroplastic-like	16.8265	3143.85	186.839	7.54565	1.24362e-06	Yes	0.000755175	Yes	Up
XP_011093699	CDS_12160_Unigene_22167	CDS_5473_Unigene_10626	serine acetyltransferase 5-like	20.1918	3267.46	161.821	7.33825	1.60946e-06	Yes	0.000872614	Yes	Up
XP_011100202	CDS_11795_Unigene_21642	CDS_31304_Unigene_48052	phosphoenolpyruvate carboxylase 1-like	96.7525	7910.13	81.7563	6.35326	1.81976e-06	Yes	0.000932802	Yes	Up
XP_011093739	CDS_11519_Unigene_21227	CDS_4473_Unigene_8694	PREDICTED: uncharacterized protein LOC105173627 isoform X1	115.262	9026.23	78.3107	6.29114	1.99046e-06	Yes	0.000974746	Yes	Up
XP_011099838	CDS_9291_Unigene_17928	CDS_17041_Unigene_28274	transcription-associated 1-like isoform X2	74.878	5440.22	72.6544	6.18298	4.52355e-06	Yes	0.0018239	Yes	Up
XP_011086610	CDS_37881_Unigene_58046	CDS_33554_Unigene_51096	alpha-glucan water chloroplastic-like	405.519	21819.1	53.8054	5.74968	6.45161e-06	Yes	0.00233195	Yes	Up
XP_011069664	CDS_28405_Unigene_44802	CDS_23179_Unigene_36735	probable serine threonine- kinase At1g01540	83.2913	5096.72	61.1915	5.93526	9.44983e-06	Yes	0.0030523	Yes	Up
XP_011086107	CDS_16786_Unigene_28744	CDS_21420_Unigene_34353	stem-specific TSJT1-like	119.468	6496.89	54.3817	5.76505	1.0236e-05	Yes	0.00323736	Yes	Up
XP_011099680	CDS_18947_Unigene_31646	CDS_13389_Unigene_23033	lipase-like PAD4	77.402	4734.19	61.1637	5.9346	1.10298e-05	Yes	0.00341722	Yes	Up
XP_011096404	CDS_12856_Unigene_23108	CDS_12283_Unigene_21379	PREDICTED: uncharacterized protein LOC105175608	284.368	13507.2	47.4991	5.56983	1.30754e-05	Yes	0.00389212	Yes	Up
XP_011070424	CDS_1678_Unigene_3880	CDS_34186_Unigene_51981	PREDICTED: uncharacterized protein LOC105156082	1.68265	947.314	562.989	9.13696	1.41868e-05	Yes	0.00414173	Yes	Up
XP_011096446	CDS_25865_Unigene_41172	CDS_17882_Unigene_29403	auxin response factor 3	39.5423	3164.05	80.0169	6.32223	1.5926e-05	Yes	0.00431736	Yes	Up
XP_006474808	CDS_17533_Unigene_29751	CDS_14936_Unigene_25225	fructose-bisphosphate cytoplasmic isozyme 1	324.752	14680.4	45.205	5.49841	1.54415e-05	Yes	0.00431736	Yes	Up
XP_011098287	CDS_11632_Unigene_21368	CDS_15106_Unigene_25495	MATE efflux family LAL5-like	97.5938	4749.64	48.6675	5.60489	2.45311e-05	Yes	0.00600656	Yes	Up
XP_011084110	CDS_21809_Unigene_35683	CDS_14834_Unigene_25066	probable galactinol--sucrose galactosyltransferase 6	1010.43	35165.9	34.8028	5.12113	2.8883e-05	Yes	0.00660336	Yes	Up
XP_012836951	CDS_34819_Unigene_53989	CDS_30567_Unigene_46990	probable quinone oxidoreductase	111.055	4704.48	42.3617	5.40469	4.07397e-05	Yes	0.00824626	Yes	Up
XP_011099030	CDS_10142_Unigene_19216	CDS_32038_Unigene_49002	receptor kinase FERONIA	23.5571	2120.46	90.0136	6.49207	4.35542e-05	Yes	0.00858697	Yes	Up
XP_011077159	CDS_18118_Unigene_30556	CDS_33688_Unigene_51258	aspartic ase 2 isoform X2	13.4612	1599.86	118.849	6.89299	5.31388e-05	Yes	0.00960357	Yes	Up
XP_011079922	CDS_12426_Unigene_22539	CDS_1521_Unigene_3463	BEACH domain-containing lvsA isoform X1	25.2398	2106.2	83.4476	6.3828	5.44177e-05	Yes	0.00971901	Yes	Up
XP_011089617	CDS_19372_Unigene_32274	CDS_27758_Unigene_43052	serine carboxypeptidase 1	17.6678	1773.39	100.374	6.64924	5.80432e-05	Yes	0.010246	Yes	Up
XP_012841109	CDS_34276_Unigene_53177	CDS_27536_Unigene_42736	probable cyclic nucleotide-gated ion channel 5	254.922	7880.42	30.9131	4.95015	7.29303e-05	Yes	0.0121665	Yes	Up
XP_011081872	CDS_21241_Unigene_34845	CDS_15999_Unigene_26807	psbP domain-containing chloroplastic	124.516	4539.26	36.4552	5.18805	7.38384e-05	Yes	0.0121841	Yes	Up
XP_012840450	CDS_39892_Unigene_62731	CDS_1010_Unigene_2230	F-box PP2-B10-like	15.1439	1565.39	103.368	6.69164	7.87017e-05	Yes	0.0127103	Yes	Up
XP_011100960	CDS_852_Unigene_2073	CDS_261_Unigene_560	salicylate carboxymethyltransferase-like	583.88	16869.8	28.8926	4.85263	8.14868e-05	Yes	0.0129403	Yes	Up
XP_011090656	CDS_36779_Unigene_56532	CDS_32076_Unigene_49058	argonaute 10	60.5755	2935.84	48.4658	5.5989	9.4046e-05	Yes	0.0141358	Yes	Up
XP_011071763	CDS_963_Unigene_2236	CDS_1181_Unigene_2585	lipase-like PAD4	12.6199	1353.82	107.276	6.74519	0.000107717	Yes	0.0155739	Yes	Up
XP_011071684	CDS_23490_Unigene_37937	CDS_33624_Unigene_51195	PHYTOCHROME KINASE SUBSTRATE 3-like	3.3653	697.708	207.324	7.69574	0.000121021	Yes	0.016702	Yes	Up
XP_012834310	CDS_34870_Unigene_54054	CDS_32844_Unigene_50111	PREDICTED: uncharacterized protein LOC105955154	0.841326	73.6932	87.5917	6.45272	0.000120873	Yes	0.016702	Yes	Up
XP_012828939	CDS_26212_Unigene_41672	CDS_18395_Unigene_30137	callose synthase 9	114.42	3849.87	33.6468	5.0724	0.000140242	Yes	0.0185131	Yes	Up
XP_011073737	CDS_13400_Unigene_23868	CDS_15891_Unigene_26665	probable polygalacturonase	62.2581	2765.87	44.4259	5.47333	0.000144738	Yes	0.018942	Yes	Up
XP_011081718	CDS_17330_Unigene_29480	CDS_16275_Unigene_27177	clathrin interactor EPSIN 1 isoform X1	129.564	4094.73	31.6038	4.98203	0.000149463	Yes	0.0192288	Yes	Up
XP_011079781	CDS_9848_Unigene_18738	CDS_4531_Unigene_8792	sugar transporter ERD6-like 7	126.199	4000.83	31.7025	4.98653	0.000155859	Yes	0.0197174	Yes	Up
XP_011077604	CDS_11907_Unigene_21810	CDS_3285_Unigene_6581	fructose-1,6- chloroplastic	870.773	20701.8	23.7741	4.57132	0.000157181	Yes	0.0197204	Yes	Up
XP_011092883	CDS_24241_Unigene_38974	CDS_12890_Unigene_22301	translocase of chloroplast chloroplastic-like	126.199	3950.91	31.307	4.96841	0.000167212	Yes	0.0208069	Yes	Up
XP_011073914	CDS_13460_Unigene_23943	CDS_836_Unigene_1923	chitinase 1	1185.43	26691.2	22.5161	4.49288	0.000174315	Yes	0.0213931	Yes	Up
XP_011069519	CDS_121_Unigene_290	CDS_4265_Unigene_8374	LRR receptor-like serine threonine- kinase ERECTA	515.733	12355.5	23.9572	4.58238	0.00017847	Yes	0.0216748	Yes	Up
XP_011087575	CDS_23265_Unigene_37603	CDS_6123_Unigene_11887	flap endonuclease 1	42.0663	2173.95	51.6791	5.69151	0.000180133	Yes	0.0217032	Yes	Up
XP_012836991	CDS_7116_Unigene_14182	CDS_12368_Unigene_21498	PREDICTED: uncharacterized protein LOC105957599	16.8265	1383.53	82.2232	6.36147	0.000185823	Yes	0.0217948	Yes	Up
XP_011096954	CDS_32442_Unigene_50551	CDS_26716_Unigene_41643	DNA mismatch repair MLH3 isoform X2	40.3837	2109.76	52.243	5.70717	0.000189508	Yes	0.0217948	Yes	Up
XP_011100076	CDS_26810_Unigene_42496	CDS_539_Unigene_1177	S-adenosylmethionine carrier chloroplastic mitochondrial	92.5459	3256.76	35.1908	5.13713	0.000186816	Yes	0.0217948	Yes	Up
XP_011070282	CDS_13163_Unigene_23534	CDS_2974_Unigene_6022	beta-amylase chloroplastic	349.15	8321.39	23.8332	4.5749	0.000187835	Yes	0.0217948	Yes	Up
XP_011078828	CDS_39459_Unigene_61657	CDS_35670_Unigene_55893	oligopeptide transporter 7-like isoform X1	403.837	9593.19	23.7551	4.57017	0.000184932	Yes	0.0217948	Yes	Up
XP_011099924	CDS_18326_Unigene_30839	CDS_21829_Unigene_34892	uncharacterized oxidoreductase At4g09670-like	106.848	3438.62	32.1822	5.00819	0.000214535	Yes	0.0237726	Yes	Up
XP_011095609	CDS_34523_Unigene_53545	CDS_28204_Unigene_43690	enhancer of mRNA-decapping 4-like	167.424	4384.74	26.1895	4.71092	0.000244586	Yes	0.0265219	Yes	Up
XP_012841353	CDS_6330_Unigene_12818	CDS_12346_Unigene_21459	vacuolar amino acid transporter 1	18.5092	1363.32	73.6567	6.20274	0.000247368	Yes	0.0266332	Yes	Up
XP_011074900	CDS_14584_Unigene_25619	CDS_3084_Unigene_6202	water chloroplastic	869.931	18387.6	21.1369	4.40169	0.000256263	Yes	0.0272051	Yes	Up
XP_011091914	CDS_2672_Unigene_6178	CDS_36030_Unigene_56548	vinorine synthase-like	14.3025	1162.45	81.2758	6.34475	0.000279345	Yes	0.0288486	Yes	Up
XP_012831701	CDS_19313_Unigene_32196	CDS_4170_Unigene_8210	monoacylglycerol lipase ABHD6	104.324	3241.31	31.0695	4.95743	0.00027806	Yes	0.0288486	Yes	Up
XP_011082310	CDS_16090_Unigene_27742	CDS_15795_Unigene_26519	transcription factor HBP-1a-like isoform X2	69.8301	2604.22	37.2937	5.22086	0.000282698	Yes	0.0289976	Yes	Up
XP_011092319	CDS_31493_Unigene_49130	CDS_26047_Unigene_40706	PREDICTED: uncharacterized protein At5g49945-like	241.461	5511.54	22.8258	4.5126	0.000288359	Yes	0.0293798	Yes	Up
XP_011082828	CDS_19736_Unigene_32770	CDS_11834_Unigene_20710	leucine-rich repeat receptor-like serine threonine- kinase At1g17230	205.284	4836.41	23.5597	4.55825	0.000299993	Yes	0.0301602	Yes	Up
XP_009626262	CDS_7833_Unigene_15513	CDS_4571_Unigene_8883	glyoxylate hydroxypyruvate reductase HPR3-like	18.5092	1287.25	69.5468	6.11991	0.000319972	Yes	0.0313387	Yes	Up
XP_011098140	CDS_36809_Unigene_56574	CDS_33144_Unigene_50498	PREDICTED: uncharacterized protein LOC105176896	96.7525	2991.71	30.9212	4.95053	0.00034518	Yes	0.0335909	Yes	Up
XP_012829622	CDS_33484_Unigene_52108	CDS_16786_Unigene_27898	alcohol dehydrogenase-like 7	182.568	4202.89	23.021	4.52488	0.000406881	Yes	0.038596	Yes	Up
XP_011089278	CDS_15331_Unigene_26616	CDS_9734_Unigene_17593	cinnamoyl- reductase 1-like	46.2729	1889.87	40.8419	5.35198	0.000477795	Yes	0.0436906	Yes	Up
XP_011078358	CDS_27107_Unigene_42916	CDS_18399_Unigene_30140	fe-S cluster assembly factor chloroplastic	298.671	5814.63	19.4684	4.28306	0.000480623	Yes	0.0436906	Yes	Up
XP_011094568	CDS_39313_Unigene_61024	CDS_35968_Unigene_56355	UDP-glycosyltransferase 73D1	2.52398	200.873	79.586	6.31444	0.00052391	Yes	0.047202	Yes	Up
XP_011096252	CDS_10756_Unigene_20108	CDS_2877_Unigene_5880	NRT1 PTR FAMILY -like	150.597	3556.29	23.6146	4.5616	0.000525468	Yes	0.047202	Yes	Up
XP_011079236	CDS_2674_Unigene_6185	CDS_15275_Unigene_25751	histone-lysine N- H3 lysine-9 specific SUVH1-like	27.7638	1408.49	50.7313	5.6648	0.000545218	Yes	0.0478436	Yes	Up
XP_012832933	CDS_14662_Unigene_25739	CDS_23069_Unigene_36590	F-box LRR-repeat MAX2 homolog A	27.7638	1406.11	50.6456	5.66237	0.000549317	Yes	0.0479263	Yes	Up
XP_011090440	CDS_978_Unigene_2262	CDS_2726_Unigene_5616	PREDICTED: uncharacterized protein LOC105171114	13.4612	936.617	69.5789	6.12058	0.000567267	Yes	0.0492096	Yes	Up
XP_011100028	CDS_16662_Unigene_28564	CDS_14455_Unigene_24504	PREDICTED: putative uncharacterized protein At4g01020, chloroplastic	20.1918	1173.15	58.1001	5.86047	0.00057183	Yes	0.0493236	Yes	Up
XP_011091175	CDS_12287_Unigene_22324	CDS_26523_Unigene_41391	ethylene receptor 2-like	100.959	2727.84	27.0192	4.75591	0.000640359	Yes	0.0537088	No	Up
XP_011090906	CDS_5714_Unigene_11824	CDS_5180_Unigene_10003	PREDICTED: uncharacterized protein LOC105171472 isoform X1	44.5903	1736.54	38.9445	5.28335	0.000654676	Yes	0.0540257	No	Up
XP_011073534	CDS_25256_Unigene_40366	CDS_25748_Unigene_40291	E3 ubiquitin- ligase XBAT34 isoform X2	15.1439	950.88	62.7897	5.97246	0.000684858	Yes	0.055598	No	Up
XP_011085363	CDS_5431_Unigene_11363	CDS_15524_Unigene_26125	PREDICTED: formimidoyltransferase-cyclodeaminase	123.675	2986.95	24.1516	4.59405	0.000723735	Yes	0.0584416	No	Up
XP_011088022	CDS_21024_Unigene_34516	CDS_250_Unigene_539	PREDICTED: uncharacterized protein LOC105169335	686.522	11092	16.1568	4.01407	0.000762745	Yes	0.0602502	No	Up
XP_012837197	CDS_3510_Unigene_7685	CDS_13812_Unigene_23605	trafficking particle complex subunit 2	21.8745	1124.42	51.4031	5.68378	0.000803976	Yes	0.0619551	No	Up
XP_011096686	CDS_848_Unigene_2069	CDS_4404_Unigene_8601	receptor kinase HAIKU2	180.885	3663.26	20.2519	4.33998	0.000800964	Yes	0.0619551	No	Up
XP_011070903	CDS_38924_Unigene_60033	CDS_5725_Unigene_11196	cytosolic sulfotransferase 12-like	11.7786	753.572	63.9783	5.99951	0.000901696	Yes	0.0671012	No	Up
XP_011080275	CDS_2393_Unigene_5482	CDS_18532_Unigene_30339	ADP,ATP carrier mitochondrial-like	2013.29	29105.2	14.4565	3.85365	0.000898243	Yes	0.0671012	No	Up
XP_011077901	CDS_13730_Unigene_24334	CDS_34932_Unigene_53930	sodium transporter HKT1-like	22.7158	1108.96	48.819	5.60937	0.000920101	Yes	0.0680808	No	Up
XP_011082534	CDS_14108_Unigene_24911	CDS_1751_Unigene_3816	piezo-type mechanosensitive ion channel homolog isoform X2	19.3505	998.424	51.5968	5.68921	0.000960176	Yes	0.0704175	No	Up
XP_011101406	CDS_29467_Unigene_46220	CDS_23868_Unigene_37692	probable LRR receptor-like serine threonine- kinase At2g24230	15.1439	856.98	56.5893	5.82246	0.000982644	Yes	0.0717188	No	Up
XP_011079338	CDS_29367_Unigene_46104	CDS_28701_Unigene_44393	ECERIFERUM 3-like	109.372	2603.03	23.7997	4.57287	0.00101925	Yes	0.0736818	No	Up
XP_012836416	CDS_32287_Unigene_50349	CDS_25158_Unigene_39460	probable ADP-ribosylation factor GTPase-activating AGD11	47.1143	1583.21	33.6037	5.07055	0.00114386	Yes	0.0807672	No	Up
XP_011097517	CDS_8351_Unigene_16370	CDS_4380_Unigene_8553	PREDICTED: uncharacterized protein LOC105176419	290.258	4652.18	16.0278	4.0025	0.00116078	Yes	0.0815822	No	Up
XP_011092747	CDS_6419_Unigene_12957	CDS_4252_Unigene_8347	ferric reduction oxidase 2-like isoform X1	74.878	2012.3	26.8744	4.74816	0.00123417	Yes	0.085163	No	Up
XP_011069526	CDS_2779_Unigene_6361	CDS_2180_Unigene_4662	chlorophyllide a chloroplastic-like	197.712	3498.05	17.6927	4.14508	0.00133156	Yes	0.0897745	No	Up
XP_011080476	CDS_39851_Unigene_62680	CDS_5585_Unigene_10886	CSC1 At4g35870	10.9372	619.26	56.6194	5.82323	0.00136974	Yes	0.091202	No	Up
XP_012078858	CDS_22011_Unigene_35987	CDS_24583_Unigene_38653	glutathione S-transferase zeta class-like	334.006	4965.97	14.8679	3.89413	0.00139301	Yes	0.091547	No	Up
XP_011091703	CDS_11827_Unigene_21699	CDS_33168_Unigene_50541	disease resistance RPP8-like	31.1291	1188.6	38.183	5.25486	0.00142057	Yes	0.0929554	No	Up
XP_011102248	CDS_22201_Unigene_36271	CDS_19771_Unigene_32057	PREDICTED: uncharacterized protein LOC105180271	16.8265	814.191	48.3873	5.59656	0.00143752	Yes	0.0936609	No	Up
XP_011091761	CDS_4696_Unigene_10048	CDS_2371_Unigene_5013	elicitor-responsive 3-like	26.0811	1061.42	40.6969	5.34685	0.00145962	Yes	0.0942917	No	Up
XP_002276171	CDS_36975_Unigene_56814	CDS_31912_Unigene_48830	receptor 12	1.68265	21.3948	12.7149	3.66845	0.00145728	Yes	0.0942917	No	Up
XP_015162055	CDS_26573_Unigene_42182	CDS_6341_Unigene_12177	dentin sialophospho -like	477.032	6559.88	13.7515	3.78151	0.00149314	Yes	0.0948426	No	Up
XP_011100785	CDS_36637_Unigene_56383	CDS_27575_Unigene_42805	serine threonine- phosphatase 4 regulatory subunit 3-like	63.0995	1748.43	27.7091	4.79229	0.00151069	Yes	0.0955574	No	Up
XP_011085314	CDS_25545_Unigene_40733	CDS_25594_Unigene_40068	probable LRR receptor-like serine threonine- kinase RFK1 isoform X2	70.6714	1849.46	26.1699	4.70983	0.00156291	Yes	0.0976402	No	Up
XP_012066591	CDS_12333_Unigene_22397	CDS_17307_Unigene_28639	PREDICTED: uncharacterized protein LOC105629587	37.8597	1290.82	34.0948	5.09148	0.00160624	Yes	0.0983327	No	Up
XP_011085849	CDS_22062_Unigene_36063	CDS_9057_Unigene_16627	nudix hydrolase mitochondrial-like	42.0663	1371.64	32.6067	5.0271	0.00160534	Yes	0.0983327	No	Up
XP_012856795	CDS_37569_Unigene_57642	CDS_32456_Unigene_49578	phospholipid-transporting ATPase 4	42.9076	1371.64	31.9674	4.99853	0.00168065	Yes	0.0996638	No	Up
XP_011074963	CDS_7835_Unigene_15520	CDS_29312_Unigene_45224	PREDICTED: patellin-3-like	232.206	3696.55	15.9192	3.9927	0.00166924	Yes	0.0996638	No	Up
XP_012837056	CDS_34147_Unigene_53016	CDS_30823_Unigene_47364	PREDICTED: uncharacterized protein LOC105957655	339.054	4818.58	14.2118	3.82902	0.00166478	Yes	0.0996638	No	Up
XP_012830214	CDS_36699_Unigene_56457	CDS_32411_Unigene_49515	cation-chloride cotransporter 1	41.225	1322.91	32.09	5.00405	0.00177108	Yes	0.103411	No	Up
XP_012842056	CDS_20166_Unigene_33321	CDS_32284_Unigene_49347	asparagine--tRNA chloroplastic mitochondrial	196.87	3295.99	16.7419	4.06539	0.00175945	Yes	0.103411	No	Up
XP_011099269	CDS_29342_Unigene_46072	CDS_30752_Unigene_47251	BEL1-like homeodomain 4	148.073	2765.87	18.6791	4.22335	0.00179077	Yes	0.104066	No	Up
XP_011099175	CDS_39667_Unigene_62026	CDS_9179_Unigene_16790	PREDICTED: uncharacterized protein LOC105177651	3.3653	61.8072	18.366	4.19897	0.00182843	Yes	0.105541	No	Up
XP_011089560	CDS_22319_Unigene_36404	CDS_24412_Unigene_38411	phospholipase SGR2-like isoform X1	17.6678	771.401	43.6613	5.44828	0.00187529	Yes	0.106715	No	Up
XP_011078587	CDS_11567_Unigene_21286	CDS_8299_Unigene_15406	adenylate kinase chloroplastic isoform X1	345.785	4756.78	13.7565	3.78204	0.00187688	Yes	0.106715	No	Up
XP_011079595	CDS_22436_Unigene_36554	CDS_28859_Unigene_44620	kynurenine--oxoglutarate transaminase 1-like	6.73061	338.751	50.3299	5.65334	0.00189176	Yes	0.106952	No	Up
XP_011085035	CDS_38706_Unigene_59656	CDS_34892_Unigene_53878	PREDICTED: protein ELC-like	53.8449	1510.71	28.0567	4.81027	0.00192621	Yes	0.107903	No	Up
XP_011082961	CDS_21219_Unigene_34820	CDS_23939_Unigene_37797	PREDICTED: uncharacterized protein LOC105165595	2487.8	28690.4	11.5324	3.52763	0.00205185	Yes	0.112452	No	Up
XP_011087962	CDS_9513_Unigene_18259	CDS_14637_Unigene_24798	GATA transcription factor 24-like isoform X2	59.7342	1567.76	26.2457	4.71401	0.00211432	Yes	0.113942	No	Up
XP_011098568	CDS_1327_Unigene_2861	CDS_6527_Unigene_12468	F-box At5g62060	72.354	1754.37	24.2471	4.59974	0.00209121	Yes	0.113942	No	Up
XP_011095828	CDS_287_Unigene_618	CDS_35010_Unigene_54047	organic cation carnitine transporter 3-like	84.9739	1920.78	22.6043	4.49853	0.00210977	Yes	0.113942	No	Up
XP_011091213	CDS_39588_Unigene_61851	CDS_35451_Unigene_55123	RING-H2 finger ATL16	5.04796	141.443	28.0199	4.80838	0.00218114	Yes	0.116685	No	Up
XP_011098517	CDS_21609_Unigene_35440	CDS_3428_Unigene_6860	xyloglucan glycosyltransferase 4	185.092	3034.5	16.3945	4.03514	0.00218289	Yes	0.116685	No	Up
XP_011099024	CDS_16128_Unigene_27821	CDS_22654_Unigene_36024	LONGIFOLIA 2-like	94.2285	2021.81	21.4564	4.42334	0.00219431	Yes	0.116745	No	Up
XP_011096196	CDS_26303_Unigene_41798	CDS_18555_Unigene_30359	TRANSPORT INHIBITOR RESPONSE 1-like	167.424	2838.38	16.9532	4.08349	0.00224515	Yes	0.117126	No	Up
XP_011085713	CDS_14008_Unigene_24746	CDS_2491_Unigene_5236	cyclic nucleotide-gated ion channel 2-like	25.2398	915.222	36.2611	5.18035	0.00226638	Yes	0.117829	No	Up
XP_013673968	CDS_17277_Unigene_29415	CDS_34378_Unigene_52735	PREDICTED: uncharacterized protein LOC106378372	45.4316	1309.84	28.831	4.84955	0.00229879	Yes	0.118133	No	Up
XP_011088614	CDS_2295_Unigene_5210	CDS_363_Unigene_754	probable BOI-related E3 ubiquitin- ligase 2	5.04796	128.369	25.4298	4.66845	0.00230337	Yes	0.118133	No	Up
XP_011085485	CDS_14556_Unigene_25585	CDS_28653_Unigene_44330	disulfide isomerase-like 2-3	100.118	2072.92	20.7048	4.37189	0.00229984	Yes	0.118133	No	Up
XP_011086553	CDS_17022_Unigene_29077	CDS_9533_Unigene_17306	methyl- -binding domain-containing 9-like	27.7638	965.143	34.7627	5.11947	0.00232161	Yes	0.118342	No	Up
XP_011078689	CDS_2442_Unigene_5664	CDS_6519_Unigene_12454	leucine-rich repeat receptor kinase TDR	45.4316	1306.27	28.7525	4.84561	0.00232303	Yes	0.118342	No	Up
XP_011088613	CDS_6643_Unigene_13356	CDS_6313_Unigene_12143	F-box At3g54460 isoform X3	23.5571	861.735	36.5806	5.19301	0.00238593	Yes	0.120335	No	Up
XP_011078272	CDS_18426_Unigene_30963	CDS_9925_Unigene_17874	sugar transport 14-like	263.335	3721.51	14.1322	3.82091	0.00238223	Yes	0.120335	No	Up
XP_011101493	CDS_51_Unigene_112	CDS_33973_Unigene_51667	UPF0481 At3g47200	38.701	1174.34	30.3438	4.92333	0.00241033	Yes	0.120763	No	Up
XP_011080988	CDS_18147_Unigene_30591	CDS_23329_Unigene_36938	PREDICTED: paramyosin-like	91.7045	1939.79	21.1527	4.40277	0.0024537	Yes	0.121274	No	Up
XP_011069575	CDS_13408_Unigene_23879	CDS_15643_Unigene_26312	polyadenylate-binding -interacting 7-like	704.19	8198.96	11.6431	3.5414	0.0024652	Yes	0.121274	No	Up
XP_011069700	CDS_22303_Unigene_36384	CDS_26831_Unigene_41751	probable inactive shikimate kinase like chloroplastic	323.911	4227.85	13.0525	3.70626	0.00254183	Yes	0.124476	No	Up
XP_011085625	CDS_11657_Unigene_21402	CDS_29743_Unigene_45829	eukaryotic translation initiation factor 4G-like isoform X1	28.6051	953.257	33.3247	5.05852	0.00257698	Yes	0.124657	No	Up
XP_011072007	CDS_10439_Unigene_19668	CDS_19418_Unigene_31559	BTB POZ and TAZ domain-containing 1	1696.11	18947.5	11.1711	3.4817	0.00256348	Yes	0.124657	No	Up
XP_011073498	CDS_36728_Unigene_56482	CDS_29480_Unigene_45461	MATH domain-containing At5g43560-like isoform X1	87.4979	1862.54	21.2866	4.41188	0.00259699	Yes	0.124763	No	Up
XP_011086859	CDS_31147_Unigene_48627	CDS_12717_Unigene_22029	serine threonine- phosphatase PP2A-2 catalytic subunit	532.559	6236.58	11.7106	3.54974	0.00265014	Yes	0.126914	No	Up
XP_011077208	CDS_6781_Unigene_13621	CDS_2627_Unigene_5455	scarecrow 14	34.4944	1061.42	30.7708	4.94349	0.00267309	Yes	0.127071	No	Up
XP_011088029	CDS_25097_Unigene_40165	CDS_5801_Unigene_11407	PREDICTED: protein starmaker-like	148.915	2544.79	17.0889	4.09499	0.00267853	Yes	0.127071	No	Up
XP_011075430	CDS_10286_Unigene_19425	CDS_10896_Unigene_19252	microtubule-associated 70-2-like	753.828	8561.48	11.3573	3.50555	0.00266844	Yes	0.127071	No	Up
XP_011099231	CDS_10563_Unigene_19828	CDS_1439_Unigene_3334	probable leucine-rich repeat receptor kinase At5g63930	19.3505	721.48	37.2848	5.22052	0.00273769	Yes	0.129071	No	Up
XP_012840751	CDS_18626_Unigene_31229	CDS_16100_Unigene_26945	PREDICTED: uncharacterized protein LOC105961060	38.701	1130.36	29.2075	4.86827	0.00276023	Yes	0.129731	No	Up
XP_011074309	CDS_36467_Unigene_56129	CDS_21199_Unigene_34050	inositol-tetrakisphosphate 1-kinase 2 isoform X1	85.8153	1805.48	21.0392	4.39501	0.00282479	Yes	0.132355	No	Up
XP_011083559	CDS_31159_Unigene_48650	CDS_11393_Unigene_20011	tubulin beta chain-like	1879.52	20256.1	10.7773	3.42992	0.00285435	Yes	0.133136	No	Up
XP_011091239	CDS_8962_Unigene_17392	CDS_17754_Unigene_29241	pre-mRNA-processing factor 19-like	88.3392	1826.88	20.6803	4.37018	0.00288837	Yes	0.134093	No	Up
XP_011074267	CDS_1099_Unigene_2480	CDS_11894_Unigene_20796	leucine-rich repeat-containing DDB_G0290503	53.8449	1359.76	25.2533	4.6584	0.00293546	Yes	0.135855	No	Up
XP_011081599	CDS_17875_Unigene_30229	CDS_21074_Unigene_33846	PREDICTED: uncharacterized protein LOC105164608	56.3688	1393.04	24.7129	4.62719	0.00297078	Yes	0.136665	No	Up
XP_011071203	CDS_22333_Unigene_36415	CDS_18594_Unigene_30416	ATP-dependent RNA helicase dhx8	18.5092	676.313	36.5394	5.19138	0.0030008	Yes	0.137118	No	Up
XP_011096255	CDS_12215_Unigene_22230	CDS_8121_Unigene_15130	bifunctional epoxide hydrolase 2-like	212.856	3089.17	14.513	3.85927	0.00300774	Yes	0.137118	No	Up
XP_012847730	CDS_12881_Unigene_23143	CDS_35404_Unigene_55052	cell division topological specificity factor chloroplastic	221.269	3148.6	14.2298	3.83084	0.00308132	Yes	0.139351	No	Up
XP_011070588	CDS_28478_Unigene_44904	CDS_25297_Unigene_39653	glucan endo-1,3-beta-glucosidase 3	10.0959	388.672	38.498	5.26671	0.00320518	Yes	0.142613	No	Up
XP_011082558	CDS_22282_Unigene_36361	CDS_12208_Unigene_21239	mitochondrial ribosome-associated GTPase 1	164.059	2597.09	15.8303	3.98461	0.00318862	Yes	0.142613	No	Up
XP_011078395	CDS_16667_Unigene_28569	CDS_16956_Unigene_28152	heat stress transcription factor C-1-like	227.999	3183.07	13.9609	3.80332	0.00319691	Yes	0.142613	No	Up
XP_011096241	CDS_19237_Unigene_32090	CDS_25206_Unigene_39528	peroxisome biogenesis factor 10-like	98.4352	1895.82	19.2595	4.2675	0.00323768	Yes	0.143026	No	Up
XP_011101653	CDS_25181_Unigene_40282	CDS_19658_Unigene_31897	rab3 GTPase-activating catalytic subunit isoform X3	62.2581	1433.45	23.0243	4.52509	0.00334565	Yes	0.145115	No	Up
XP_011072950	CDS_2481_Unigene_5744	CDS_2535_Unigene_5308	PREDICTED: uncharacterized protein LOC105158039	13.4612	495.646	36.8203	5.20243	0.00342669	Yes	0.146951	No	Up
XP_011077889	CDS_13089_Unigene_23433	CDS_5784_Unigene_11364	serine threonine- kinase D6PKL1-like	35.3357	997.235	28.2217	4.81874	0.0034736	Yes	0.148543	No	Up
XP_011070516	CDS_35147_Unigene_54397	CDS_22881_Unigene_36340	sodium hydrogen exchanger 7 isoform X2	135.454	2248.83	16.6022	4.05331	0.00356224	Yes	0.149801	No	Up
XP_011082476	CDS_37922_Unigene_58095	CDS_33641_Unigene_51215	PREDICTED: uncharacterized protein LOC105165229	111.055	1986.15	17.8844	4.16063	0.00360874	Yes	0.151338	No	Up
XP_011092645	CDS_18345_Unigene_30863	CDS_17863_Unigene_29378	probable carotenoid cleavage dioxygenase chloroplastic	891.806	9249.68	10.3719	3.3746	0.00362252	Yes	0.151497	No	Up
XP_011092960	CDS_2079_Unigene_4705	CDS_8604_Unigene_15936	zeaxanthin chloroplastic-like	21.8745	710.783	32.4937	5.02209	0.00364382	Yes	0.151969	No	Up
XP_011086753	CDS_34112_Unigene_52987	CDS_27686_Unigene_42944	lipoxygenase chloroplastic	595.659	6307.9	10.5898	3.4046	0.00369239	Yes	0.153154	No	Up
XP_011102056	CDS_36577_Unigene_56290	CDS_32859_Unigene_50132	PREDICTED: adenosylhomocysteinase	2566.89	25140.1	9.794	3.2919	0.00376869	Yes	0.155047	No	Up
XP_012852995	CDS_28081_Unigene_44340	CDS_26092_Unigene_40771	NRT1 PTR FAMILY -like	30.2877	872.432	28.8048	4.84824	0.0038564	Yes	0.157801	No	Up
XP_011085926	CDS_38966_Unigene_60146	CDS_4038_Unigene_8008	REVEILLE 1	14.3025	488.514	34.1558	5.09406	0.00396606	Yes	0.161633	No	Up
XP_011072520	CDS_22910_Unigene_37160	CDS_8890_Unigene_16375	receptor-like serine threonine- kinase ALE2	21.8745	688.199	31.4613	4.97551	0.00398105	Yes	0.161633	No	Up
XP_011090662	CDS_28608_Unigene_45046	CDS_18794_Unigene_30702	PREDICTED: uncharacterized protein LOC105171293	47.1143	1148.19	24.3703	4.60705	0.00402618	Yes	0.16299	No	Up
XP_011080360	CDS_39472_Unigene_61675	CDS_34411_Unigene_52779	phospholipase A1- chloroplastic	10.0959	333.997	33.0823	5.04799	0.00409772	Yes	0.164136	No	Up
XP_011094867	CDS_17284_Unigene_29426	CDS_16212_Unigene_27101	ribonuclease chloroplastic mitochondrial	157.328	2389.09	15.1854	3.92461	0.00409637	Yes	0.164136	No	Up
XP_011089755	CDS_4367_Unigene_9454	CDS_12846_Unigene_22236	E3 ubiquitin- ligase CIP8-like isoform X1	31.1291	864.112	27.759	4.79488	0.00420295	Yes	0.167054	No	Up
XP_011071859	CDS_39095_Unigene_60658	CDS_6349_Unigene_12192	PREDICTED: uncharacterized protein LOC105157216	68.1474	1426.32	20.9299	4.38749	0.00420359	Yes	0.167054	No	Up
XP_011099088	CDS_17901_Unigene_30261	CDS_20945_Unigene_33669	ATP-dependent zinc metalloprotease FTSH chloroplastic	352.516	3971.11	11.2651	3.49378	0.00434928	Yes	0.170171	No	Up
XP_012851984	CDS_38904_Unigene_59988	CDS_35313_Unigene_54919	probable carboxylesterase 120	174.155	2504.38	14.3802	3.84601	0.00439648	Yes	0.17097	No	Up
XP_012830901	CDS_171_Unigene_412	CDS_14065_Unigene_23976	PAT1 homolog 1	185.933	2605.41	14.0126	3.80866	0.00442413	Yes	0.17097	No	Up
XP_011088787	CDS_9739_Unigene_18571	CDS_8775_Unigene_16184	alpha-L-fucosidase 1	63.9408	1345.49	21.0428	4.39526	0.00452087	Yes	0.172369	No	Up
XP_011086837	CDS_11400_Unigene_21067	CDS_224_Unigene_498	glucose-6-phosphate 1- chloroplastic-like	230.523	2942.97	12.7665	3.67429	0.00469534	Yes	0.176436	No	Up
XP_015080212	CDS_799_Unigene_1960	CDS_13939_Unigene_23772	CLP protease regulatory subunit mitochondrial-like	181.726	2517.45	13.853	3.79213	0.00482025	Yes	0.178915	No	Up
XP_012857287	CDS_24504_Unigene_39328	CDS_19110_Unigene_31135	zinc finger 8	127.882	1996.85	15.6148	3.96484	0.00504142	Yes	0.185312	No	Up
XP_011072662	CDS_34442_Unigene_53414	CDS_9802_Unigene_17694	PREDICTED: uncharacterized protein LOC105157864 isoform X1	33.653	837.963	24.9001	4.63808	0.00541107	Yes	0.191036	No	Up
XP_011093464	CDS_345_Unigene_751	CDS_7692_Unigene_14431	ABC transporter C family member 15	16.8265	487.326	28.9618	4.85608	0.00543705	Yes	0.191508	No	Up
XP_011070535	CDS_17203_Unigene_29321	CDS_16599_Unigene_27609	mediator of RNA polymerase II transcription subunit 27	97.5938	1648.59	16.8923	4.0783	0.00558344	Yes	0.194596	No	Up
XP_011095600	CDS_17532_Unigene_29750	CDS_14934_Unigene_25223	fructose-bisphosphate cytoplasmic isozyme 1	2313.65	20462.9	8.84445	3.14477	0.00561445	Yes	0.194596	No	Up
XP_011082674	CDS_219_Unigene_475	CDS_8496_Unigene_15723	3-deoxy-manno-octulosonate mitochondrial	58.0515	1188.6	20.4749	4.35579	0.00565607	Yes	0.195592	No	Up
XP_011078363	CDS_32281_Unigene_50343	CDS_30631_Unigene_47097	probable ADP-ribosylation factor GTPase-activating AGD14	55.5275	1150.56	20.7206	4.373	0.00572613	Yes	0.195708	No	Up
XP_011072373	CDS_20075_Unigene_33228	CDS_26821_Unigene_41740	homeobox-leucine zipper GLABRA 2	88.3392	1542.8	17.4645	4.12636	0.0056955	Yes	0.195708	No	Up
XP_011094291	CDS_10877_Unigene_20300	CDS_26045_Unigene_40705	transcription initiation factor TFIID subunit 2 isoform X1	95.0699	1611.74	16.9532	4.08349	0.005726	Yes	0.195708	No	Up
XP_011083501	CDS_10583_Unigene_19851	CDS_27909_Unigene_43249	IQ-DOMAIN 32	144.708	2093.12	14.4645	3.85444	0.00569228	Yes	0.195708	No	Up
XP_012829818	CDS_9159_Unigene_17713	CDS_4259_Unigene_8363	PREDICTED: uncharacterized protein LOC105950974	678.109	6285.32	9.26889	3.2124	0.00573677	Yes	0.195708	No	Up
XP_012835351	CDS_22976_Unigene_37258	CDS_24712_Unigene_38823	ATP-dependent Clp protease proteolytic subunit-related chloroplastic	1256.94	11351.1	9.03075	3.17485	0.00578688	Yes	0.196441	No	Up
XP_011084165	CDS_32960_Unigene_51296	CDS_28373_Unigene_43922	PREDICTED: uncharacterized protein At3g49140 isoform X3	25.2398	662.05	26.2304	4.71317	0.00585062	Yes	0.196664	No	Up
XP_011085891	CDS_9187_Unigene_17758	CDS_21401_Unigene_34325	pre-mRNA-splicing factor 38B-like	114.42	1795.97	15.6963	3.97235	0.00585549	Yes	0.196664	No	Up
XP_011075891	CDS_13712_Unigene_24313	CDS_9885_Unigene_17808	two-component response regulator-like APRR9	180.044	2390.27	13.2761	3.73076	0.00584069	Yes	0.196664	No	Up
XP_011089486	CDS_30779_Unigene_48107	CDS_24578_Unigene_38636	telomere repeat-binding 5	169.107	2290.43	13.5443	3.75962	0.00589869	Yes	0.197291	No	Up
XP_012842502	CDS_10970_Unigene_20425	CDS_24780_Unigene_38901	PREDICTED: uncharacterized protein LOC105962724	17.6678	488.514	27.6499	4.7892	0.00593899	Yes	0.197988	No	Up
XP_012849560	CDS_37559_Unigene_57631	CDS_24418_Unigene_38415	phospholipid-transporting ATPase 8	49.6382	1055.48	21.2634	4.4103	0.00596113	Yes	0.198022	No	Up
XP_011090683	CDS_15939_Unigene_27514	CDS_20846_Unigene_33527	PREDICTED: myosin-9-like	71.5127	1334.8	18.6652	4.22228	0.00599258	Yes	0.198199	No	Up
XP_011070024	CDS_5635_Unigene_11702	CDS_17259_Unigene_28567	PREDICTED: uncharacterized protein LOC105155775	65.6234	1258.73	19.1811	4.26161	0.00608523	Yes	0.198764	No	Up
XP_012854855	CDS_10755_Unigene_20108	CDS_28598_Unigene_44275	NRT1 PTR FAMILY -like	127.04	1894.63	14.9136	3.89856	0.00612397	Yes	0.199502	No	Up
XP_011069396	CDS_22963_Unigene_37238	CDS_6767_Unigene_12857	PREDICTED: protein DEK-like	1089.52	9518.31	8.73626	3.12702	0.00645915	Yes	0.208188	No	Up
XP_011081988	CDS_24460_Unigene_39280	CDS_16839_Unigene_27972	probable folate-biopterin transporter 2	35.3357	813.002	23.008	4.52406	0.00652877	Yes	0.209232	No	Up
XP_011097929	CDS_16881_Unigene_28886	CDS_19398_Unigene_31526	PREDICTED: kinesin-3	206.966	2540.04	12.2727	3.61738	0.00656973	Yes	0.209232	No	Up
XP_011084696	CDS_33417_Unigene_52020	CDS_30316_Unigene_46645	V-type proton ATPase subunit H-like	368.501	3720.32	10.0958	3.33569	0.00655766	Yes	0.209232	No	Up
XP_011075582	CDS_29256_Unigene_45959	CDS_20512_Unigene_33040	alpha-1,4 glucan phosphorylase L-2 chloroplastic amyloplastic-like	3318.19	27506.6	8.28963	3.05131	0.00655785	Yes	0.209232	No	Up
XP_011071506	CDS_8216_Unigene_16140	CDS_12314_Unigene_21417	PREDICTED: uncharacterized protein At4g15545	354.198	3599.08	10.1612	3.345	0.00671136	Yes	0.212533	No	Up
XP_011073815	CDS_11814_Unigene_21679	CDS_6202_Unigene_12008	disease resistance At1g50180	393.741	3874.84	9.84109	3.29882	0.00673398	Yes	0.212533	No	Up
XP_011074943	CDS_30004_Unigene_46978	CDS_27912_Unigene_43254	PREDICTED: uncharacterized protein LOC105159540 isoform X2	104.324	1631.95	15.643	3.96745	0.0067978	Yes	0.2139	No	Up
XP_011082725	CDS_11986_Unigene_21937	CDS_14620_Unigene_24767	ras-related Rab11B	201.918	2472.29	12.244	3.614	0.00687794	Yes	0.215287	No	Up
XP_011089575	CDS_14723_Unigene_25815	CDS_13402_Unigene_23051	ubiquitin carboxyl-terminal hydrolase 5	63.9408	1189.79	18.6077	4.21782	0.0069647	Yes	0.216219	No	Up
XP_011082360	CDS_2565_Unigene_5952	CDS_3192_Unigene_6389	29 kDa chloroplastic	1163.55	9941.45	8.54404	3.09492	0.00696345	Yes	0.216219	No	Up
XP_011081596	CDS_26802_Unigene_42488	CDS_26778_Unigene_41679	copper-transporting ATPase chloroplastic	233.047	2696.93	11.5725	3.53262	0.00703373	Yes	0.217054	No	Up
XP_011082337	CDS_4856_Unigene_10372	CDS_4432_Unigene_8641	metal-nicotianamine transporter YSL1-like isoform X1	599.866	5343.94	8.90857	3.15519	0.00703449	Yes	0.217054	No	Up
XP_011073492	CDS_4919_Unigene_10479	CDS_2510_Unigene_5269	PREDICTED: uncharacterized protein LOC105158432	1103.82	9398.26	8.5143	3.08989	0.00703393	Yes	0.217054	No	Up
XP_011071653	CDS_40252_Unigene_63740	CDS_4561_Unigene_8863	PREDICTED: uncharacterized protein LOC105157054	5.88928	65.373	11.1003	3.47253	0.00708304	Yes	0.217665	No	Up
XP_011072682	CDS_34694_Unigene_53784	CDS_30149_Unigene_46400	AT-rich interactive domain-containing 4	376.914	3707.24	9.83578	3.29804	0.00711163	Yes	0.217665	No	Up
XP_011077581	CDS_566_Unigene_1267	CDS_5158_Unigene_9966	PREDICTED: laccase-4-like	41.225	873.621	21.1915	4.40542	0.00724884	Yes	0.22053	No	Up
XP_011092018	CDS_14759_Unigene_25860	CDS_11221_Unigene_19754	PREDICTED: uncharacterized protein LOC105172335 isoform X1	19.3505	481.383	24.877	4.63674	0.00729043	Yes	0.220973	No	Up
XP_011072776	CDS_31192_Unigene_48715	CDS_27552_Unigene_42772	probable mitochondrial adenine nucleotide transporter BTL1	62.2581	1152.94	18.5187	4.21091	0.00729249	Yes	0.220973	No	Up
XP_011080549	CDS_18645_Unigene_31251	CDS_18563_Unigene_30374	PREDICTED: uncharacterized protein LOC105163785	81.6086	1369.27	16.7785	4.06854	0.00736383	Yes	0.222121	No	Up
XP_011075080	CDS_30553_Unigene_47780	CDS_21019_Unigene_33764	osmotic avoidance abnormal 3-like	632.677	5524.61	8.73212	3.12633	0.0073664	Yes	0.222121	No	Up
XP_011086848	CDS_12224_Unigene_22241	CDS_2590_Unigene_5399	NAC transcription factor 25	198.553	2402.16	12.0983	3.59674	0.00739529	Yes	0.222313	No	Up
XP_011071702	CDS_10094_Unigene_19122	CDS_2236_Unigene_4766	cyclic dof factor 3-like	55.5275	1062.61	19.1366	4.25826	0.00741136	Yes	0.222355	No	Up
XP_011080876	CDS_39398_Unigene_61545	CDS_8438_Unigene_15620	cation H(+) antiporter 18-like	8.41326	127.18	15.1166	3.91806	0.00744373	Yes	0.222886	No	Up
XP_011070775	CDS_34490_Unigene_53496	CDS_1229_Unigene_2724	probable leucine-rich repeat receptor kinase At1g68400	584.722	5144.26	8.79779	3.13714	0.00747547	Yes	0.222957	No	Up
XP_012844854	CDS_2742_Unigene_6312	CDS_17633_Unigene_29106	G-type lectin S-receptor-like serine threonine- kinase At4g27290	96.7525	1511.9	15.6265	3.96592	0.00758449	Yes	0.22324	No	Up
XP_011080886	CDS_33390_Unigene_51994	CDS_30154_Unigene_46407	PREDICTED: uncharacterized protein LOC105164037	165.741	2126.4	12.8297	3.68141	0.00753649	Yes	0.22324	No	Up
XP_011074395	CDS_36250_Unigene_55825	CDS_32815_Unigene_50073	polyadenylate-binding 8-like	1843.35	15214.1	8.25351	3.04501	0.0075279	Yes	0.22324	No	Up
XP_011101302	CDS_7553_Unigene_14991	CDS_4663_Unigene_9032	cell division cycle 48 homolog	31.1291	697.708	22.4134	4.48629	0.00771929	Yes	0.22489	No	Up
XP_011086679	CDS_3162_Unigene_7072	CDS_4871_Unigene_9475	-tyrosine-phosphatase MKP1-like isoform X2	65.6234	1171.96	17.8589	4.15857	0.00774769	Yes	0.22489	No	Up
XP_011080468	CDS_18173_Unigene_30623	CDS_24102_Unigene_37970	PREDICTED: uncharacterized protein LOC105163723	138.819	1888.68	13.6054	3.76611	0.007705	Yes	0.22489	No	Up
XP_011087215	CDS_17274_Unigene_29413	CDS_25853_Unigene_40436	NRT1 PTR FAMILY -like	60.5755	1110.15	18.3268	4.19588	0.00776664	Yes	0.22501	No	Up
XP_011071105	CDS_4460_Unigene_9593	CDS_15835_Unigene_26575	CRS2-associated factor chloroplastic	166.583	2114.52	12.6935	3.66602	0.00780275	Yes	0.225626	No	Up
XP_012831128	CDS_34212_Unigene_53096	CDS_26017_Unigene_40666	PREDICTED: uncharacterized protein LOC105952158	422.346	3920	9.2815	3.21436	0.00790826	Yes	0.227788	No	Up
XP_012845174	CDS_27410_Unigene_43380	CDS_25692_Unigene_40216	aspartic ase 1 isoform X1	35.3357	758.327	21.4606	4.42362	0.00794097	Yes	0.227886	No	Up
XP_012837214	CDS_14563_Unigene_25592	CDS_2517_Unigene_5274	hippocampus abundant transcript 1	22.7158	533.681	23.4938	4.55421	0.00796224	Yes	0.228065	No	Up
XP_012829590	CDS_10387_Unigene_19585	CDS_29908_Unigene_46054	tyrosine- kinase CSK-like	36.177	769.024	21.2573	4.40988	0.0080092	Yes	0.228979	No	Up
XP_011096269	CDS_38709_Unigene_59659	CDS_7844_Unigene_14662	SWI SNF-related matrix-associated actin-dependent regulator of chromatin subfamily A member 3-like 1 isoform X2	10.0959	179.479	17.7773	4.15197	0.00814308	Yes	0.232369	No	Up
XP_012849061	CDS_34603_Unigene_53688	CDS_31816_Unigene_48726	subtilisin-like protease	14.3025	328.054	22.9367	4.51959	0.00819471	Yes	0.233403	No	Up
XP_011097705	CDS_22137_Unigene_36171	CDS_25483_Unigene_39915	probable amino acid permease 7	60.5755	1080.44	17.8362	4.15674	0.00846416	Yes	0.240177	No	Up
XP_011092433	CDS_34668_Unigene_53753	CDS_2914_Unigene_5940	PREDICTED: BRCA1-associated protein	10.0959	169.97	16.8355	4.07343	0.0085725	Yes	0.242797	No	Up
XP_011079012	CDS_20148_Unigene_33307	CDS_21532_Unigene_34489	glutamate receptor	31.9704	681.068	21.3031	4.41299	0.00866318	Yes	0.2441	No	Up
XP_011092569	CDS_7182_Unigene_14311	CDS_16151_Unigene_27018	PREDICTED: uncharacterized protein LOC105172718 isoform X3	84.1326	1333.61	15.8513	3.98653	0.00864588	Yes	0.2441	No	Up
XP_011081033	CDS_36932_Unigene_56752	CDS_33107_Unigene_50441	PREDICTED: transportin-1-like	116.103	1635.51	14.0867	3.81627	0.00866676	Yes	0.2441	No	Up
XP_011095521	CDS_1659_Unigene_3814	CDS_14728_Unigene_24923	ABC transporter C family member 3-like	12.6199	259.115	20.5322	4.35982	0.00883119	Yes	0.246899	No	Up
XP_012831444	CDS_22850_Unigene_37079	CDS_27729_Unigene_43014	ECERIFERUM 1-like isoform X1	534.242	4559.47	8.53446	3.0933	0.00886456	Yes	0.247377	No	Up
XP_011092105	CDS_12664_Unigene_22880	CDS_4209_Unigene_8281	probable phosphatase 2C 34	470.301	4112.56	8.74451	3.12838	0.00898653	Yes	0.249493	No	Up
XP_012836394	CDS_29537_Unigene_46314	CDS_29139_Unigene_44998	glycosyltransferase-like KOBITO 1	25.2398	551.51	21.8508	4.44962	0.00907482	Yes	0.251396	No	Up
XP_011088308	CDS_1503_Unigene_3248	CDS_9844_Unigene_17759	flavonol synthase flavanone 3-hydroxylase-like	36.177	729.8	20.173	4.33436	0.00923074	Yes	0.25241	No	Up
XP_011076071	CDS_15799_Unigene_27323	CDS_13434_Unigene_23100	ATP-dependent RNA helicase DHX36	42.9076	826.077	19.2524	4.26697	0.00924445	Yes	0.25241	No	Up
XP_011082588	CDS_36313_Unigene_55924	CDS_32373_Unigene_49467	transport Sec24-like At3g07100	42.9076	826.077	19.2524	4.26697	0.00924445	Yes	0.25241	No	Up
XP_011093988	CDS_10630_Unigene_19914	CDS_23562_Unigene_37283	PREDICTED: uncharacterized protein LOC105173804	286.051	2893.05	10.1138	3.33825	0.00915036	Yes	0.25241	No	Up
XP_012836911	CDS_25441_Unigene_40625	CDS_23721_Unigene_37494	D-3-phosphoglycerate dehydrogenase chloroplastic	364.294	3382.75	9.28578	3.21502	0.00940873	Yes	0.255975	No	Up
XP_011073829	CDS_695_Unigene_1661	CDS_2989_Unigene_6051	UDP-glycosyltransferase 92A1-like	50.4796	916.41	18.1541	4.18222	0.00954369	Yes	0.257798	No	Up
XP_011096020	CDS_4513_Unigene_9718	CDS_12410_Unigene_21570	PREDICTED: uncharacterized protein LOC105175311	10.0959	152.141	15.0695	3.91356	0.0095328	Yes	0.257798	No	Up
XP_011084497	CDS_30072_Unigene_47080	CDS_32488_Unigene_49618	cyclic nucleotide-gated ion channel 1-like	204.442	2297.56	11.2382	3.49034	0.00949973	Yes	0.257798	No	Up
XP_011093497	CDS_12397_Unigene_22490	CDS_4593_Unigene_8947	PREDICTED: uncharacterized protein At5g05190	43.749	823.7	18.8279	4.2348	0.00969273	Yes	0.260783	No	Up
XP_012858958	CDS_4927_Unigene_10498	CDS_33994_Unigene_51690	ATP-dependent Clp protease proteolytic subunit-related chloroplastic	731.112	5799.18	7.93199	2.98768	0.00976212	Yes	0.261373	No	Up
XP_011101924	CDS_26036_Unigene_41421	CDS_28967_Unigene_44781	MACPF domain-containing CAD1	25.2398	531.304	21.0503	4.39577	0.00984928	Yes	0.263243	No	Up
XP_012838395	CDS_19817_Unigene_32873	CDS_21358_Unigene_34260	sn1-specific diacylglycerol lipase alpha-like	15.1439	311.413	20.5636	4.36202	0.00989713	Yes	0.264057	No	Up
XP_011084015	CDS_1666_Unigene_3830	CDS_28098_Unigene_43537	two-component response regulator ARR12-like	25.2398	528.927	20.9561	4.3893	0.00994536	Yes	0.264283	No	Up
XP_007047876	CDS_729_Unigene_1767	CDS_36387_Unigene_57424	Peroxidase superfamily	47.9556	870.055	18.1429	4.18134	0.00999263	Yes	0.264283	No	Up
XP_011074709	CDS_17942_Unigene_30320	CDS_6346_Unigene_12188	zeaxanthin chloroplastic-like	51.3209	912.845	17.787	4.15275	0.00998698	Yes	0.264283	No	Up
XP_011098857	CDS_2167_Unigene_4881	CDS_5176_Unigene_9996	calcium-binding partial	10.0959	145.009	14.3632	3.8443	0.00999258	Yes	0.264283	No	Up
XP_011085248	CDS_16558_Unigene_28411	CDS_21547_Unigene_34507	nucleolar GTP-binding 1 isoform X1	217.903	2368.88	10.8712	3.44244	0.00993674	Yes	0.264283	No	Up
XP_011096832	CDS_28184_Unigene_44477	CDS_27928_Unigene_43282	phenylalanine--tRNA chloroplastic mitochondrial	781.592	6096.33	7.79989	2.96345	0.0100959	Yes	0.266088	No	Up
XP_011096737	CDS_23361_Unigene_37750	CDS_22529_Unigene_35843	probable ribose-5-phosphate isomerase chloroplastic	22.7158	475.44	20.9299	4.38749	0.0101685	Yes	0.267536	No	Up
XP_011096202	CDS_39315_Unigene_61027	CDS_82_Unigene_176	F-box At1g61340-like	59.7342	1005.56	16.8338	4.07329	0.0102551	Yes	0.268883	No	Up
XP_012840812	CDS_31335_Unigene_48882	CDS_22734_Unigene_36131	TRANSPARENT TESTA 12-like	26.9224	551.51	20.4852	4.35651	0.0102778	Yes	0.269013	No	Up
XP_012851957	CDS_2783_Unigene_6364	CDS_2931_Unigene_5963	pentatricopeptide repeat-containing chloroplastic	40.3837	759.515	18.8075	4.23324	0.0103223	Yes	0.269712	No	Up
XP_012834406	CDS_33755_Unigene_52502	CDS_28546_Unigene_44191	gamma-tubulin complex component 3	30.2877	601.431	19.8573	4.31159	0.0105864	Yes	0.274254	No	Up
XP_011072605	CDS_29600_Unigene_46407	CDS_8337_Unigene_15465	WAT1-related At2g39510-like isoform X2	166.583	1946.93	11.6875	3.54689	0.0106997	Yes	0.27525	No	Up
XP_011094929	CDS_8829_Unigene_17181	CDS_8450_Unigene_15651	PREDICTED: uncharacterized protein LOC105174502	19.3505	393.427	20.3316	4.34565	0.0107858	Yes	0.276121	No	Up
XP_011071350	CDS_11393_Unigene_21058	CDS_32862_Unigene_50140	probable beta-1,3-galactosyltransferase 16	95.9112	1357.38	14.1525	3.82298	0.0108829	Yes	0.277349	No	Up
XP_011089853	CDS_35109_Unigene_54351	CDS_31932_Unigene_48851	PREDICTED: uncharacterized protein LOC105170680 isoform X1	170.789	1969.51	11.5318	3.52755	0.0108886	Yes	0.277349	No	Up
XP_011097420	CDS_26955_Unigene_42706	CDS_2561_Unigene_5345	1-phosphatidylinositol-3-phosphate 5-kinase FAB1D	376.914	3341.15	8.8645	3.14804	0.0108846	Yes	0.277349	No	Up
XP_011092084	CDS_6513_Unigene_13105	CDS_2441_Unigene_5146	PREDICTED: uncharacterized protein LOC105172385	26.0811	519.418	19.9155	4.31582	0.0110132	Yes	0.278455	No	Up
XP_011075635	CDS_3206_Unigene_7138	CDS_10327_Unigene_18444	vacuolar amino acid transporter 1-like	15.1439	288.83	19.0724	4.25341	0.0110183	Yes	0.278455	No	Up
XP_011081121	CDS_22609_Unigene_36761	CDS_26180_Unigene_40881	LRR receptor-like serine threonine- kinase GSO2	69.8301	1094.7	15.6766	3.97054	0.0109909	Yes	0.278455	No	Up
XP_011071268	CDS_14013_Unigene_24755	CDS_11551_Unigene_20254	pentatricopeptide repeat-containing At1g13630	13.4612	237.72	17.6596	4.14238	0.0111011	Yes	0.279016	No	Up
XP_011075964	CDS_27709_Unigene_43820	CDS_22830_Unigene_36257	PREDICTED: protein ABIL2-like	59.7342	979.406	16.3961	4.03528	0.0110977	Yes	0.279016	No	Up
XP_011084438	CDS_29527_Unigene_46300	CDS_33272_Unigene_50679	mitogen-activated kinase kinase kinase YODA-like	135.454	1681.87	12.4166	3.6342	0.0112122	Yes	0.280878	No	Up
XP_011076067	CDS_4145_Unigene_9051	CDS_7783_Unigene_14567	PREDICTED: uncharacterized protein LOC105160403	137.977	1697.32	12.3014	3.62075	0.0113244	Yes	0.281828	No	Up
XP_011078243	CDS_18250_Unigene_30720	CDS_12795_Unigene_22139	receptor kinase HSL1	40.3837	728.612	18.0422	4.17331	0.0115259	Yes	0.283882	No	Up
XP_012833208	CDS_39958_Unigene_62841	CDS_207_Unigene_472	indole-3-acetic acid-amido synthetase	10.0959	125.992	12.4795	3.64148	0.0115378	Yes	0.283882	No	Up
XP_011073857	CDS_24361_Unigene_39134	CDS_4453_Unigene_8672	BTB POZ domain-containing At3g49900	13.4612	229.4	17.0415	4.09098	0.0115579	Yes	0.283918	No	Up
XP_011071688	CDS_17847_Unigene_30190	CDS_2139_Unigene_4582	NAC domain-containing 100-like	21.0332	408.878	19.4397	4.28093	0.0117843	Yes	0.287615	No	Up
XP_011096065	CDS_40140_Unigene_63429	CDS_3822_Unigene_7683	tRNA wybutosine-synthesizing 2 3 4	84.1326	1212.37	14.4102	3.84902	0.0118768	Yes	0.289409	No	Up
XP_011099660	CDS_1743_Unigene_4098	CDS_2907_Unigene_5928	alcohol dehydrogenase 1B	1723.04	12443.5	7.22182	2.85236	0.0119354	Yes	0.289906	No	Up
XP_011074308	CDS_30707_Unigene_48016	CDS_20538_Unigene_33075	probable inactive poly [ADP-ribose] polymerase SRO3	55.5275	906.902	16.3325	4.02967	0.0119582	Yes	0.289996	No	Up
XP_011072097	CDS_21761_Unigene_35609	CDS_23440_Unigene_37096	PREDICTED: uncharacterized protein LOC105157385	68.9887	1054.29	15.282	3.93376	0.0120156	Yes	0.29079	No	Up
XP_015083664	CDS_6213_Unigene_12621	CDS_4929_Unigene_9563	nicotinamidase 1-like	935.555	6803.54	7.2722	2.86239	0.0121841	Yes	0.293133	No	Up
XP_011072267	CDS_6783_Unigene_13626	CDS_12229_Unigene_21277	pleiotropic drug resistance 1-like	15.1439	265.058	17.5026	4.1295	0.0123438	Yes	0.295104	No	Up
XP_011092401	CDS_38286_Unigene_58608	CDS_8946_Unigene_16468	PREDICTED: uncharacterized protein LOC105172591 isoform X1	147.232	1729.41	11.7462	3.55412	0.0123165	Yes	0.295104	No	Up
XP_011100361	CDS_14457_Unigene_25434	CDS_30026_Unigene_46234	O-acyltransferase WSD1-like	167.424	1872.04	11.1815	3.48304	0.0125168	Yes	0.298771	No	Up
XP_011093723	CDS_24760_Unigene_39706	CDS_21131_Unigene_33937	potassium channel AKT1-like	62.2581	962.766	15.4641	3.95085	0.0127134	Yes	0.301567	No	Up
XP_011075114	CDS_28263_Unigene_44585	CDS_26224_Unigene_40955	PREDICTED: uncharacterized protein LOC105159671 isoform X1	1047.45	7463.22	7.12512	2.83291	0.0127574	Yes	0.301941	No	Up
XP_011100260	CDS_20_Unigene_62	CDS_1408_Unigene_3246	PREDICTED: uncharacterized protein LOC105178478	127.882	1558.25	12.1851	3.60705	0.0128844	Yes	0.303521	No	Up
XP_011086216	CDS_20448_Unigene_33704	CDS_2215_Unigene_4732	E3 ubiquitin- ligase COP1-like	393.741	3300.74	8.38304	3.06747	0.0128958	Yes	0.303521	No	Up
XP_011070126	CDS_3962_Unigene_8628	CDS_209_Unigene_474	peroxisome biogenesis 19-2-like	281.003	2618.49	9.31836	3.22008	0.0129791	Yes	0.305009	No	Up
XP_011074258	CDS_16201_Unigene_27944	CDS_5980_Unigene_11669	F-box kelch-repeat SKIP25-like	43.749	738.12	16.8717	4.07654	0.013048	Yes	0.306154	No	Up
XP_011087488	CDS_12204_Unigene_22210	CDS_9902_Unigene_17829	nicotianamine synthase-like	39.5423	682.256	17.2538	4.10884	0.0130863	Yes	0.306394	No	Up
XP_011099355	CDS_2180_Unigene_4923	CDS_384_Unigene_816	LOB domain-containing 37-like	67.3061	1006.74	14.9577	3.90282	0.0130986	Yes	0.306394	No	Up
XP_011075994	CDS_16657_Unigene_28551	CDS_2327_Unigene_4934	BOBBER 1	116.103	1454.85	12.5306	3.64739	0.0131385	Yes	0.306854	No	Up
XP_011083838	CDS_1539_Unigene_3391	CDS_7012_Unigene_13287	PREDICTED: uncharacterized protein LOC105166244	302.036	2733.78	9.05117	3.1781	0.013254	Yes	0.309076	No	Up
XP_012834329	CDS_34872_Unigene_54054	CDS_32842_Unigene_50110	PREDICTED: uncharacterized protein LOC105955174 isoform X1	27.7638	501.589	18.0663	4.17523	0.0133637	Yes	0.311157	No	Up
XP_011097953	CDS_4221_Unigene_9219	CDS_29707_Unigene_45766	G-type lectin S-receptor-like serine threonine- kinase At4g27290	11.7786	149.764	12.7149	3.66845	0.0137062	Yes	0.317004	No	Up
XP_011098070	CDS_5826_Unigene_12010	CDS_12243_Unigene_21300	PREDICTED: uncharacterized protein LOC105176840 isoform X2	26.9224	480.194	17.8362	4.15674	0.013786	Yes	0.317581	No	Up
XP_011094893	CDS_12584_Unigene_22759	CDS_5273_Unigene_10191	PREDICTED: uncharacterized protein LOC105174471	253.239	2397.41	9.46696	3.2429	0.0139159	Yes	0.318638	No	Up
XP_011090721	CDS_18101_Unigene_30530	CDS_2838_Unigene_5812	PREDICTED: uncharacterized protein LOC105171345	16.8265	276.944	16.4588	4.04078	0.0143517	Yes	0.325184	No	Up
XP_011088780	CDS_29375_Unigene_46112	CDS_22814_Unigene_36243	serine threonine- kinase ATR	13.4612	187.799	13.9511	3.80231	0.0144056	Yes	0.325918	No	Up
XP_012836174	CDS_17727_Unigene_30045	CDS_24647_Unigene_38729	myosin-binding 7-like	90.8632	1198.11	13.1858	3.72092	0.0145401	Yes	0.328473	No	Up
XP_011093647	CDS_9682_Unigene_18485	CDS_11504_Unigene_20183	probable glutamate carboxypeptidase 2 isoform X2	772.337	5418.83	7.01614	2.81068	0.0146751	Yes	0.33103	No	Up
XP_011088506	CDS_3794_Unigene_8263	CDS_6683_Unigene_12684	PREDICTED: uncharacterized protein LOC105169716 isoform X1	22.7158	391.049	17.2149	4.10558	0.0148087	Yes	0.333052	No	Up
XP_011099123	CDS_12486_Unigene_22638	CDS_13924_Unigene_23751	DNA polymerase alpha catalytic subunit	152.28	1666.42	10.9431	3.45195	0.0151846	Yes	0.33862	No	Up
XP_011069529	CDS_18735_Unigene_31370	CDS_14159_Unigene_24109	F-box 7	159.852	1722.28	10.7742	3.42951	0.0151305	Yes	0.33862	No	Up
XP_011073720	CDS_12350_Unigene_22422	CDS_13554_Unigene_23246	G3BP isoform X1	200.236	1995.66	9.96655	3.31709	0.015238	Yes	0.33862	No	Up
XP_011090738	CDS_2468_Unigene_5729	CDS_1669_Unigene_3693	sugar transport 13	368.501	3020.23	8.196	3.03492	0.0152334	Yes	0.33862	No	Up
XP_011073515	CDS_40463_Unigene_64093	CDS_19974_Unigene_32308	1-aminocyclopropane-1-carboxylate oxidase homolog 1-like	41.225	658.484	15.9729	3.99756	0.0154878	Yes	0.340262	No	Up
XP_011099060	CDS_17965_Unigene_30348	CDS_17795_Unigene_29285	heat shock factor HSF30	113.579	1365.7	12.0242	3.58787	0.0154637	Yes	0.340262	No	Up
XP_011071622	CDS_16607_Unigene_28473	CDS_12608_Unigene_21875	ABC transporter A family member 7-like isoform X2	164.9	1747.24	10.5958	3.40542	0.0154587	Yes	0.340262	No	Up
XP_011083139	CDS_28716_Unigene_45192	CDS_26652_Unigene_41552	callose synthase 3	153.121	1659.29	10.8364	3.43781	0.0156081	Yes	0.340439	No	Up
XP_011098978	CDS_17184_Unigene_29308	CDS_10289_Unigene_18389	PREDICTED: uncharacterized protein LOC105177492	902.743	6123.67	6.7834	2.76201	0.0155679	Yes	0.340439	No	Up
XP_011099873	CDS_1514_Unigene_3306	CDS_17468_Unigene_28893	PREDICTED: LOW QUALITY PROTEIN: uncharacterized protein LOC105178172	26.9224	448.102	16.6442	4.05695	0.0158288	Yes	0.343432	No	Up
XP_011074531	CDS_37669_Unigene_57771	CDS_33063_Unigene_50378	PREDICTED: uncharacterized protein LOC105159236 isoform X2	31.9704	526.55	16.4699	4.04176	0.0157982	Yes	0.343432	No	Up
XP_011080978	CDS_21164_Unigene_34750	CDS_34533_Unigene_52945	auxin-induced 22C-like	312.973	2674.35	8.54498	3.09508	0.0158142	Yes	0.343432	No	Up
XP_011091420	CDS_23182_Unigene_37501	CDS_22160_Unigene_35309	PREDICTED: uncharacterized protein LOC105171868	395.423	3139.09	7.93856	2.98888	0.0158584	Yes	0.343432	No	Up
XP_011076873	CDS_26892_Unigene_42628	CDS_12690_Unigene_21983	PREDICTED: uncharacterized protein LOC105161020 isoform X1	31.9704	524.172	16.3956	4.03523	0.01595	Yes	0.344925	No	Up
XP_012834628	CDS_21059_Unigene_34569	CDS_35075_Unigene_54179	PREDICTED: uncharacterized protein LOC105955450	219.586	2090.75	9.52131	3.25116	0.0161078	Yes	0.345178	No	Up
XP_011072001	CDS_18846_Unigene_31527	CDS_10604_Unigene_18838	28 kDa chloroplastic-like	599.024	4215.96	7.03805	2.81518	0.0166528	Yes	0.354427	No	Up
XP_011073420	CDS_8645_Unigene_16871	CDS_3223_Unigene_6457	topless-related 4	44.5903	678.69	15.2206	3.92795	0.0167477	Yes	0.354629	No	Up
XP_011073453	CDS_15938_Unigene_27513	CDS_5939_Unigene_11611	GRIP and coiled-coil domain-containing 2-like	849.739	5667.24	6.66939	2.73755	0.0168201	Yes	0.355636	No	Up
XP_012828204	CDS_32469_Unigene_50598	CDS_27493_Unigene_42670	hydroxymethylglutaryl- mitochondrial-like	29.4464	473.063	16.0652	4.00587	0.0168519	Yes	0.355812	No	Up
XP_011074721	CDS_11645_Unigene_21385	CDS_7551_Unigene_14197	phospholipase D delta-like	33.653	530.115	15.7524	3.9775	0.017174	Yes	0.358368	No	Up
XP_011086542	CDS_32387_Unigene_50467	CDS_27527_Unigene_42724	potassium transporter 6-like isoform X2	18.5092	278.132	15.0267	3.90946	0.017209	Yes	0.358368	No	Up
XP_011082970	CDS_721_Unigene_1749	CDS_678_Unigene_1549	F-box At3g07870-like	10.0959	91.5222	9.06527	3.18035	0.0171917	Yes	0.358368	No	Up
XP_011092750	CDS_13641_Unigene_24212	CDS_21438_Unigene_34369	transmembrane 45B	6.73061	48.7326	7.24044	2.85608	0.0170319	Yes	0.358368	No	Up
XP_011072063	CDS_813_Unigene_1992	CDS_4759_Unigene_9245	pentatricopeptide repeat-containing At2g13600-like	15.1439	196.119	12.9504	3.69492	0.0176175	Yes	0.364434	No	Up
XP_012832185	CDS_30656_Unigene_47944	CDS_15733_Unigene_26427	PREDICTED: uncharacterized protein LOC105953101 isoform X2	66.4648	898.581	13.5197	3.75699	0.0176597	Yes	0.364751	No	Up
XP_011095677	CDS_11788_Unigene_21628	CDS_7455_Unigene_14061	WD repeat-containing 75	323.911	2650.58	8.18305	3.03264	0.0178579	Yes	0.367345	No	Up
XP_011092107	CDS_37727_Unigene_57850	CDS_33140_Unigene_50494	topless-related 3-like	303.719	2535.28	8.34747	3.06134	0.0178845	Yes	0.367395	No	Up
XP_011088324	CDS_17607_Unigene_29840	CDS_8330_Unigene_15453	cold-regulated 413 plasma membrane 2-like	355.04	2815.79	7.93093	2.98749	0.0180349	Yes	0.369485	No	Up
XP_011077572	CDS_24083_Unigene_38747	CDS_28023_Unigene_43422	auxin transporter 2	441.696	3279.35	7.42444	2.89228	0.01809	Yes	0.370114	No	Up
XP_011086670	CDS_20904_Unigene_34326	CDS_18513_Unigene_30305	PREDICTED: uncharacterized protein LOC105168326	31.1291	479.006	15.3877	3.94371	0.0182605	Yes	0.371598	No	Up
XP_011097537	CDS_31472_Unigene_49091	CDS_31448_Unigene_48232	14-3-3 16R	1871.11	11807.5	6.31045	2.65774	0.018331	Yes	0.372534	No	Up
XP_011078934	CDS_21272_Unigene_34903	CDS_17616_Unigene_29085	EARLY RESPONSIVE TO DEHYDRATION 15	2009.93	12636	6.28679	2.65232	0.0184407	Yes	0.372768	No	Up
XP_011086131	CDS_11978_Unigene_21926	CDS_9924_Unigene_17873	sugar carrier C	1368.84	8623.29	6.29972	2.65529	0.01851	Yes	0.373671	No	Up
XP_011102094	CDS_16057_Unigene_27678	CDS_18918_Unigene_30868	selenium-binding 2- partial	37.8597	565.773	14.944	3.90149	0.0186787	Yes	0.374128	No	Up
XP_011072092	CDS_2340_Unigene_5308	CDS_5266_Unigene_10179	abietadienol abietadienal oxidase	11.7786	114.106	9.68756	3.27613	0.0186658	Yes	0.374128	No	Up
XP_012852457	CDS_22493_Unigene_36633	CDS_15798_Unigene_26527	eukaryotic translation initiation factor 6-2	527.511	3700.11	7.01428	2.81029	0.0187352	Yes	0.374236	No	Up
XP_011094246	CDS_19826_Unigene_32883	CDS_4599_Unigene_8959	nuclear transcription factor Y subunit A-10	32.8117	494.457	15.0695	3.91356	0.0189168	Yes	0.376872	No	Up
XP_011072393	CDS_21647_Unigene_35462	CDS_21608_Unigene_34579	PREDICTED: uncharacterized protein LOC105157660 isoform X1	107.69	1230.2	11.4236	3.51394	0.0192137	Yes	0.380797	No	Up
XP_011101499	CDS_1721_Unigene_4010	CDS_1206_Unigene_2666	vacuolar iron transporter homolog 2-like	17.6678	236.531	13.3877	3.74283	0.0193731	Yes	0.381515	No	Up
XP_011081455	CDS_27514_Unigene_43535	CDS_12286_Unigene_21382	PREDICTED: protein ABIL4-like	19.3505	269.812	13.9434	3.80151	0.0195842	Yes	0.383204	No	Up
XP_011079298	CDS_13525_Unigene_24047	CDS_19106_Unigene_31129	PREDICTED: uncharacterized protein LOC105162844	252.398	2177.51	8.62731	3.10891	0.0195414	Yes	0.383204	No	Up
XP_011070965	CDS_17144_Unigene_29246	CDS_934_Unigene_2123	ERAD-associated E3 ubiquitin- ligase HRD1B-like	148.915	1520.22	10.2087	3.35172	0.0197069	Yes	0.384537	No	Up
XP_011086402	CDS_8809_Unigene_17163	CDS_25390_Unigene_39793	PREDICTED: uncharacterized protein LOC105168149 isoform X1	90.8632	1079.25	11.8777	3.57019	0.0198867	Yes	0.386537	No	Up
XP_011074362	CDS_26492_Unigene_42066	CDS_2966_Unigene_6011	interferon-related developmental regulator 1	290.258	2377.2	8.18997	3.03386	0.0201762	Yes	0.391174	No	Up
XP_012857545	CDS_13039_Unigene_23353	CDS_18673_Unigene_30517	pseudouridine-metabolizing bifunctional	58.8928	778.533	13.2195	3.72459	0.020371	Yes	0.392667	No	Up
XP_011083055	CDS_34485_Unigene_53487	CDS_7705_Unigene_14449	PHR1-LIKE 1-like	111.055	1231.39	11.0881	3.47094	0.0204423	Yes	0.392667	No	Up
XP_011082907	CDS_17094_Unigene_29184	CDS_13318_Unigene_22926	PREDICTED: uncharacterized protein LOC105165551	171.631	1655.72	9.647	3.27008	0.0203684	Yes	0.392667	No	Up
XP_011070499	CDS_36967_Unigene_56797	CDS_26985_Unigene_41987	cell division cycle and apoptosis regulator 1 isoform X2	615.009	4066.2	6.61161	2.725	0.0204486	Yes	0.392667	No	Up
XP_012838913	CDS_19771_Unigene_32822	CDS_23004_Unigene_36504	uncharacterized WD repeat-containing isoform X1	1869.43	11414.1	6.10568	2.61015	0.02034	Yes	0.392667	No	Up
XP_011085087	CDS_22526_Unigene_36666	CDS_25057_Unigene_39323	MLO 1 isoform X3	40.3837	571.716	14.1571	3.82346	0.0206382	Yes	0.393998	No	Up
XP_012836137	CDS_32769_Unigene_51052	CDS_23444_Unigene_37102	HUA2 2	209.49	1886.31	9.00428	3.17061	0.0206589	Yes	0.393998	No	Up
XP_012835527	CDS_12312_Unigene_22353	CDS_18156_Unigene_29796	wall-associated receptor kinase 2-like	13.4612	135.5	10.066	3.33142	0.0208017	Yes	0.395502	No	Up
XP_011096621	CDS_10358_Unigene_19541	CDS_887_Unigene_2055	PREDICTED: uncharacterized protein LOC105175754	222.11	1960	8.82446	3.14151	0.0207652	Yes	0.395502	No	Up
XP_012853971	CDS_21903_Unigene_35850	CDS_16613_Unigene_27628	PREDICTED: uncharacterized protein At1g04910-like	54.6862	728.612	13.3235	3.7359	0.0208612	Yes	0.395868	No	Up
XP_011082592	CDS_3811_Unigene_8314	CDS_11525_Unigene_20222	LONGIFOLIA 1-like	20.1918	273.378	13.539	3.75905	0.0209099	Yes	0.396296	No	Up
XP_011072253	CDS_20769_Unigene_34138	CDS_7239_Unigene_13710	bifunctional UDP-glucose 4-epimerase and UDP-xylose 4-epimerase 1-like	337.372	2610.17	7.73676	2.95173	0.0209484	Yes	0.396532	No	Up
XP_011095527	CDS_1336_Unigene_2896	CDS_23984_Unigene_37881	mitochondrial import inner membrane translocase subunit TIM50	185.933	1729.41	9.30126	3.21743	0.0210906	Yes	0.397735	No	Up
XP_011099832	CDS_10613_Unigene_19893	CDS_10145_Unigene_18190	PREDICTED: LOW QUALITY PROTEIN: uncharacterized protein LOC105178147	169.107	1616.5	9.55904	3.25687	0.0213402	Yes	0.400452	No	Up
XP_011088916	CDS_15275_Unigene_26540	CDS_16244_Unigene_27146	vesicle-associated membrane 714	292.781	2335.6	7.97728	2.9959	0.0219388	Yes	0.408653	No	Up
XP_011091176	CDS_21731_Unigene_35557	CDS_20695_Unigene_33302	PREDICTED: uncharacterized protein LOC105171682	56.3688	729.8	12.9469	3.69453	0.022031	Yes	0.408866	No	Up
XP_011090966	CDS_6607_Unigene_13288	CDS_1794_Unigene_3877	translocase of chloroplast chloroplastic-like	111.896	1207.62	10.7923	3.43193	0.0220287	Yes	0.408866	No	Up
XP_011084943	CDS_15131_Unigene_26317	CDS_7664_Unigene_14380	PREDICTED: uncharacterized protein LOC105167077	53.0035	692.954	13.0737	3.7086	0.0222203	Yes	0.409886	No	Up
XP_012841971	CDS_35183_Unigene_54454	CDS_31243_Unigene_47964	STRUBBELIG-RECEPTOR FAMILY 8	158.169	1526.16	9.64891	3.27037	0.0222209	Yes	0.409886	No	Up
XP_011089309	CDS_14443_Unigene_25416	CDS_1092_Unigene_2357	F-box kelch-repeat At5g60570	564.53	3719.13	6.58801	2.71984	0.0221801	Yes	0.409886	No	Up
XP_012844295	CDS_24315_Unigene_39067	CDS_23685_Unigene_37444	cinnamoyl- reductase 1-like	269.224	2190.59	8.13667	3.02444	0.0223647	Yes	0.411039	No	Up
XP_011088662	CDS_31970_Unigene_49827	CDS_30322_Unigene_46651	rop guanine nucleotide exchange factor 1	73.1954	884.318	12.0816	3.59474	0.0223579	Yes	0.411039	No	Up
XP_011075974	CDS_11895_Unigene_21793	CDS_21752_Unigene_34784	membrane of ER body	95.9112	1075.68	11.2154	3.48741	0.022435	Yes	0.411832	No	Up
XP_011089770	CDS_22356_Unigene_36448	CDS_10488_Unigene_18673	alpha-ketoglutarate-dependent dioxygenase alkB homolog 6 isoform X2	17.6678	206.816	11.7058	3.54915	0.0228355	Yes	0.417166	No	Up
XP_011074754	CDS_27837_Unigene_44008	CDS_6308_Unigene_12138	PREDICTED: protein FAM188A	114.42	1212.37	10.5958	3.40542	0.02281	Yes	0.417166	No	Up
XP_011070639	CDS_1794_Unigene_4244	CDS_5219_Unigene_10096	1-phosphatidylinositol 3-phosphate 5-kinase	152.28	1473.86	9.67864	3.2748	0.0228852	Yes	0.417572	No	Up
XP_011088392	CDS_21479_Unigene_35242	CDS_17996_Unigene_29548	BTB POZ domain-containing At3g05675-like	172.472	1602.23	9.28982	3.21565	0.0229564	Yes	0.417637	No	Up
XP_011090260	CDS_3844_Unigene_8381	CDS_8531_Unigene_15795	feruloyl ortho-hydroxylase 1-like	45.4316	601.431	13.2382	3.72663	0.0230563	Yes	0.417682	No	Up
XP_011071116	CDS_17189_Unigene_29310	CDS_1595_Unigene_3587	cysteine-rich receptor kinase 2	48.7969	638.278	13.0803	3.70932	0.0230547	Yes	0.417682	No	Up
XP_011088863	CDS_16435_Unigene_28264	CDS_19895_Unigene_32206	probable aldo-keto reductase 2 isoform X1	567.895	3697.73	6.5113	2.70294	0.0230178	Yes	0.417682	No	Up
XP_012849527	CDS_12238_Unigene_22259	CDS_16673_Unigene_27728	PREDICTED: uncharacterized protein LOC105969316	117.786	1227.82	10.4242	3.38187	0.0233329	Yes	0.420762	No	Up
XP_011092240	CDS_35059_Unigene_54292	CDS_32437_Unigene_49559	probable leucine-rich repeat receptor kinase At5g49770 isoform X3	223.793	1900.57	8.49255	3.0862	0.0234685	Yes	0.422628	No	Up
XP_011084595	CDS_680_Unigene_1625	CDS_35552_Unigene_55334	PREDICTED: uncharacterized protein LOC105166806	858.153	5166.84	6.02089	2.58998	0.0236045	Yes	0.424072	No	Up
XP_012847135	CDS_574_Unigene_1283	CDS_18864_Unigene_30792	NUCLEAR FUSION DEFECTIVE 4-like	14.3025	135.5	9.47386	3.24395	0.0239088	Yes	0.428017	No	Up
XP_011094448	CDS_12344_Unigene_22414	CDS_11742_Unigene_20565	pentatricopeptide repeat-containing At5g03800	43.749	571.716	13.0681	3.70798	0.024015	Yes	0.429186	No	Up
XP_011084521	CDS_7531_Unigene_14957	CDS_5465_Unigene_10608	phosphatase 2C 57	3149.08	17886	5.67976	2.50583	0.0240305	Yes	0.429186	No	Up
XP_011085973	CDS_130_Unigene_328	CDS_7020_Unigene_13305	PREDICTED: uncharacterized protein LOC105167841	15.1439	149.764	9.88939	3.30588	0.0241119	Yes	0.430026	No	Up
XP_011083238	CDS_1687_Unigene_3892	CDS_6270_Unigene_12087	probable carboxylesterase 18	67.3061	804.682	11.9556	3.57961	0.0242817	Yes	0.43164	No	Up
XP_011078216	CDS_28736_Unigene_45226	CDS_16924_Unigene_28103	ATP-dependent DNA helicase Q-like 3	86.6566	969.897	11.1924	3.48445	0.0243746	Yes	0.432419	No	Up
XP_012851448	CDS_5794_Unigene_11965	CDS_35689_Unigene_55913	WAT1-related chloroplastic	365.977	2647.01	7.23273	2.85454	0.0244246	Yes	0.43266	No	Up
XP_011095492	CDS_135_Unigene_357	CDS_2809_Unigene_5760	MO25 At5g47540	40.3837	527.738	13.0681	3.70798	0.024485	Yes	0.432674	No	Up
XP_011082324	CDS_25904_Unigene_41225	CDS_21049_Unigene_33812	PREDICTED: uncharacterized protein LOC105165127 isoform X2	157.328	1475.05	9.37565	3.22892	0.0245009	Yes	0.432674	No	Up
XP_011071940	CDS_25611_Unigene_40812	CDS_21198_Unigene_34046	DEAD-box ATP-dependent RNA helicase 20 isoform X2	121.992	1233.77	10.1135	3.33821	0.024747	Yes	0.435829	No	Up
XP_011090010	CDS_38992_Unigene_60283	CDS_21849_Unigene_34922	pleiotropic drug resistance 2-like	34.4944	449.291	13.025	3.70322	0.0251447	Yes	0.436674	No	Up
XP_011072388	CDS_10810_Unigene_20194	CDS_3693_Unigene_7441	transcription factor bHLH68-like isoform X1	27.7638	361.334	13.0146	3.70206	0.0249123	Yes	0.436674	No	Up
XP_009604301	CDS_2660_Unigene_6155	CDS_2274_Unigene_4846	probable LRR receptor-like serine threonine- kinase At3g47570	113.579	1166.02	10.2661	3.35982	0.0251977	Yes	0.436674	No	Up
XP_011074405	CDS_12524_Unigene_22689	CDS_16213_Unigene_27103	transcription factor EMB1444-like	117.786	1201.67	10.2022	3.35081	0.0248744	Yes	0.436674	No	Up
XP_011097813	CDS_13932_Unigene_24636	CDS_13608_Unigene_23312	auxin transporter 3	180.044	1604.61	8.91233	3.1558	0.0251238	Yes	0.436674	No	Up
XP_011089290	CDS_26677_Unigene_42347	CDS_6242_Unigene_12053	GRAM domain-containing 1A	190.14	1668.79	8.77667	3.13367	0.0249628	Yes	0.436674	No	Up
XP_011085673	CDS_27386_Unigene_43349	CDS_9055_Unigene_16625	PREDICTED: uncharacterized protein LOC105167598	238.095	1946.93	8.17709	3.03159	0.0249795	Yes	0.436674	No	Up
XP_012857823	CDS_23393_Unigene_37789	CDS_13897_Unigene_23714	wall-associated receptor kinase-like 8	344.102	2513.89	7.30564	2.86901	0.0251672	Yes	0.436674	No	Up
XP_011097972	CDS_17452_Unigene_29660	CDS_20693_Unigene_33296	polyadenylate-binding RBP45-like	1060.07	6131.99	5.78451	2.53219	0.025158	Yes	0.436674	No	Up
XP_011071947	CDS_6769_Unigene_13598	CDS_2058_Unigene_4425	pentatricopeptide repeat-containing At1g08070-like	19.3505	219.891	11.3636	3.50635	0.0255201	Yes	0.440752	No	Up
XP_012841462	CDS_28647_Unigene_45090	CDS_27741_Unigene_43032	NEDD8-activating enzyme E1 regulatory subunit	77.402	877.187	11.3329	3.50244	0.0255075	Yes	0.440752	No	Up
XP_011073037	CDS_27827_Unigene_43997	CDS_31266_Unigene_47984	retrovirus-related Pol poly from transposon TNT 1-94	21.8745	262.681	12.0085	3.58599	0.0258595	Yes	0.444275	No	Up
XP_011088157	CDS_28818_Unigene_45341	CDS_24677_Unigene_38777	cytokinin dehydrogenase 6-like	19.3505	217.514	11.2407	3.49066	0.0258704	Yes	0.444275	No	Up
XP_011086850	CDS_14166_Unigene_24994	CDS_13857_Unigene_23665	pyruvate dehydrogenase E1 component subunit beta- mitochondrial-like	33.653	430.273	12.7856	3.67644	0.026078	Yes	0.446325	No	Up
XP_011070262	CDS_20035_Unigene_33176	CDS_22408_Unigene_35666	decapping nuclease DXO chloroplastic	192.664	1660.47	8.61851	3.10744	0.0261268	Yes	0.446656	No	Up
XP_011091270	CDS_19656_Unigene_32660	CDS_1041_Unigene_2276	PREDICTED: uncharacterized protein LOC105171755	31.1291	394.615	12.6767	3.66411	0.0264457	Yes	0.447338	No	Up
XP_011089046	CDS_16791_Unigene_28749	CDS_251_Unigene_541	PREDICTED: uncharacterized protein LOC105170123	74.0367	836.774	11.3022	3.49853	0.0264388	Yes	0.447338	No	Up
XP_011072157	CDS_5763_Unigene_11903	CDS_6591_Unigene_12561	PREDICTED: uncharacterized protein LOC105157447	16.8265	168.781	10.0307	3.32634	0.0263184	Yes	0.447338	No	Up
XP_012841478	CDS_33398_Unigene_52001	CDS_11279_Unigene_19839	PREDICTED: uncharacterized protein LOC105961762	125.358	1231.39	9.82301	3.29617	0.0263394	Yes	0.447338	No	Up
XP_010519017	CDS_10003_Unigene_18973	CDS_16314_Unigene_27221	choline-phosphate cytidylyltransferase 1-like isoform X2	456.84	3032.12	6.63715	2.73056	0.026364	Yes	0.447338	No	Up
XP_011072498	CDS_21919_Unigene_35873	CDS_9566_Unigene_17358	thioredoxin-like chloroplastic	37.8597	477.817	12.6207	3.65772	0.026534	Yes	0.44757	No	Up
XP_012834804	CDS_27660_Unigene_43742	CDS_13963_Unigene_23808	PREDICTED: uncharacterized protein LOC105955596	31.1291	393.427	12.6386	3.65976	0.0265902	Yes	0.447862	No	Up
XP_011097026	CDS_11283_Unigene_20906	CDS_5618_Unigene_10965	PREDICTED: uncharacterized protein LOC105176044	406.361	2773	6.824	2.77062	0.0269076	Yes	0.449872	No	Up
XP_011084314	CDS_16392_Unigene_28206	CDS_8837_Unigene_16291	OTU domain-containing DDB_G0284757 isoform X1	29.4464	367.277	12.4727	3.64071	0.0270599	Yes	0.451922	No	Up
XP_011095407	CDS_23958_Unigene_38569	CDS_5369_Unigene_10390	probable beta-1,3-galactosyltransferase 2	247.35	1938.61	7.83751	2.97039	0.0276678	Yes	0.457543	No	Up
XP_012856497	CDS_1907_Unigene_4437	CDS_3256_Unigene_6521	D-3-phosphoglycerate dehydrogenase chloroplastic-like	1432.78	7920.83	5.5283	2.46684	0.0276676	Yes	0.457543	No	Up
XP_012846950	CDS_23966_Unigene_38576	CDS_30617_Unigene_47077	wall-associated receptor kinase-like 11	42.9076	524.172	12.2163	3.61074	0.0278211	Yes	0.457743	No	Up
XP_011087884	CDS_4987_Unigene_10610	CDS_9880_Unigene_17801	copper-transporting ATPase chloroplastic	123.675	1196.92	9.67795	3.2747	0.0278347	Yes	0.457743	No	Up
XP_012842343	CDS_35065_Unigene_54297	CDS_32453_Unigene_49571	probable leucine-rich repeat receptor kinase At5g49770	153.963	1396.6	9.07106	3.18127	0.0277419	Yes	0.457743	No	Up
XP_003593234	CDS_12972_Unigene_23286	CDS_15411_Unigene_25940	2-oxoglutarate malate translocator	6.73061	38.0352	5.65108	2.49853	0.0278322	Yes	0.457743	No	Up
XP_012829705	CDS_25035_Unigene_40095	CDS_23623_Unigene_37367	DNA polymerase eta isoform X3	90.8632	950.88	10.465	3.38749	0.0282589	Yes	0.461853	No	Up
XP_011087524	CDS_25800_Unigene_41070	CDS_26211_Unigene_40931	PREDICTED: uncharacterized protein LOC105168987	164.9	1454.85	8.8226	3.1412	0.0283094	Yes	0.461853	No	Up
XP_011078916	CDS_35402_Unigene_54773	CDS_24335_Unigene_38293	nuclear pore complex NUP93A-like	190.14	1599.86	8.4141	3.07281	0.0285925	Yes	0.464238	No	Up
XP_011086364	CDS_20863_Unigene_34270	CDS_19263_Unigene_31340	PREDICTED: LOW QUALITY PROTEIN: uncharacterized protein LOC105168115	219.586	1766.26	8.04358	3.00784	0.0286319	Yes	0.464381	No	Up
XP_011090607	CDS_2159_Unigene_4874	CDS_4795_Unigene_9308	E3 ubiquitin- ligase RKP	137.136	1274.18	9.29134	3.21589	0.0286913	Yes	0.464849	No	Up
XP_011100352	CDS_5530_Unigene_11537	CDS_3157_Unigene_6330	mitotic checkpoint serine threonine- kinase BUB1	18.5092	185.422	10.0178	3.3245	0.0287559	Yes	0.464938	No	Up
XP_012836697	CDS_15273_Unigene_26537	CDS_28452_Unigene_44065	3-phosphoinositide-dependent kinase 2-like	84.1326	890.261	10.5816	3.40349	0.028898	Yes	0.465571	No	Up
XP_011077249	CDS_16263_Unigene_28034	CDS_17218_Unigene_28510	probable receptor kinase At5g47070	227.999	1807.86	7.92923	2.98718	0.02889	Yes	0.465571	No	Up
XP_015168676	CDS_20156_Unigene_33310	CDS_21533_Unigene_34490	glutamate receptor -like isoform X2	12.6199	93.8994	7.44059	2.89542	0.02892	Yes	0.465571	No	Up
XP_012065458	CDS_2859_Unigene_6494	CDS_26019_Unigene_40668	PREDICTED: uncharacterized protein LOC105628624	116.944	1132.74	9.68611	3.27592	0.0290616	Yes	0.465823	No	Up
XP_011072033	CDS_26047_Unigene_41436	CDS_23478_Unigene_37163	bifunctional D-cysteine desulfhydrase 1-aminocyclopropane-1-carboxylate mitochondrial	1127.38	6199.74	5.49926	2.45924	0.0291197	Yes	0.465823	No	Up
XP_012856361	CDS_10067_Unigene_19073	CDS_4559_Unigene_8856	late blight resistance homolog R1B-17	44.5903	530.115	11.8886	3.57151	0.0292096	Yes	0.466279	No	Up
XP_011089848	CDS_33362_Unigene_51959	CDS_31108_Unigene_47769	PREDICTED: LOW QUALITY PROTEIN: phototropin-1	1439.51	7811.48	5.42649	2.44002	0.0292719	Yes	0.466548	No	Up
XP_011081539	CDS_22717_Unigene_36905	CDS_20446_Unigene_32936	PREDICTED: uncharacterized protein LOC105164560	327.276	2311.83	7.06385	2.82045	0.0297339	Yes	0.470768	No	Up
XP_011100067	CDS_6628_Unigene_13327	CDS_4153_Unigene_8184	haloacid dehalogenase-like hydrolase domain-containing At4g39970	1306.58	7067.41	5.4091	2.43539	0.0298605	Yes	0.471218	No	Up
XP_011075723	CDS_15523_Unigene_26909	CDS_29193_Unigene_45077	heparan-alpha-glucosaminide N-acetyltransferase-like	111.055	1079.25	9.71814	3.28068	0.0299444	Yes	0.472052	No	Up
[truncated: 160 more rows]

## Sheet: Downregulated
id	CONTROL_CDS_ID	DROUGHT_CDS_ID	Description	Control_baseMean	Drought_baseMean	foldChange	log2FoldChange	pval	Significance	padj	Significance	Regulation
[truncated: 665 more rows]

[truncated: 2 more sheets: Exclusive_Control, Exclusive_Drought]
