# Supplementary material for: Ocimum metabolomics in response to abiotic stresses: Cold, flood, drought and salinity
Source: PLoS One. 2019 Feb 6;14(2):e0210903. doi: 10.1371/journal.pone.0210903 (PMC6364901; doi:10.1371/journal.pone.0210903)
Supplement: S9 Table — (XLSX) [file pone.0210903.s016.xlsx]

## Sheet: COLD Up-regulated
#Term	Database	ID	Input number	Background number	P-Value	Corrected P-Value	Input	Hyperlink
Nicotinate and nicotinamide metabolism	KEGG PATHWAY	ath00760	2	16	0.0106844	0.459429	CDS_9705_Unigene_18624|CDS_23321_Unigene_38750	http://www.genome.jp/kegg-bin/show_pathway?ath00760/ath:AT2G36310%09red/ath:AT4G14930%09red
Plant hormone signal transduction	KEGG PATHWAY	ath04075	6	271	0.0359744	0.536262	CDS_19059_Unigene_32728|CDS_3685_Unigene_7931|CDS_12_Unigene_32|CDS_4024_Unigene_8630|CDS_24957_Unigene_40994|CDS_30521_Unigene_50315	http://www.genome.jp/kegg-bin/show_pathway?ath04075/ath:AT3G11410%09red/ath:AT2G25490%09red/ath:AT3G23150%09red/ath:AT2G25180%09red/ath:AT3G04730%09red
Sulfur metabolism	KEGG PATHWAY	ath00920	2	41	0.054685	0.536262	CDS_31992_Unigene_53697|CDS_1821_Unigene_3813	http://www.genome.jp/kegg-bin/show_pathway?ath00920/ath:AT5G56760%09red/ath:AT1G55920%09red
Plant-pathogen interaction	KEGG PATHWAY	ath04626	4	167	0.0641952	0.536262	CDS_32359_Unigene_54716|CDS_32333_Unigene_54682|CDS_8224_Unigene_16350|CDS_32382_Unigene_54747	http://www.genome.jp/kegg-bin/show_pathway?ath04626/ath:AT1G21550%09red/ath:AT5G15410%09red/ath:AT1G76650%09red/ath:AT3G48080%09red
Monoterpenoid biosynthesis	KEGG PATHWAY	ath00902	1	7	0.0680547	0.536262	CDS_27465_Unigene_44728	http://www.genome.jp/kegg-bin/show_pathway?ath00902/ath:AT2G24210%09red
Cysteine and methionine metabolism	KEGG PATHWAY	ath00270	3	112	0.0806903	0.536262	CDS_31992_Unigene_53697|CDS_32509_Unigene_54940|CDS_1821_Unigene_3813	http://www.genome.jp/kegg-bin/show_pathway?ath00270/ath:AT4G17260%09red/ath:AT1G55920%09red/ath:AT5G56760%09red
Pyrimidine metabolism	KEGG PATHWAY	ath00240	3	116	0.0872984	0.536262	CDS_20546_Unigene_34806|CDS_9705_Unigene_18624|CDS_23321_Unigene_38750	http://www.genome.jp/kegg-bin/show_pathway?ath00240/ath:AT2G36310%09red/ath:AT4G25180%09red/ath:AT4G14930%09red
Glucosinolate biosynthesis	KEGG PATHWAY	ath00966	1	19	0.161584	0.585944	CDS_155_Unigene_260	http://www.genome.jp/kegg-bin/show_pathway?ath00966/ath:AT4G31500%09red
Flavonoid biosynthesis	KEGG PATHWAY	ath00941	1	21	0.176237	0.585944	CDS_23862_Unigene_39529	http://www.genome.jp/kegg-bin/show_pathway?ath00941/ath:AT5G07990%09red
Zeatin biosynthesis	KEGG PATHWAY	ath00908	1	23	0.190635	0.585944	CDS_91_Unigene_144	http://www.genome.jp/kegg-bin/show_pathway?ath00908/ath:AT2G36750%09red
Lysine degradation	KEGG PATHWAY	ath00310	1	26	0.211763	0.585944	CDS_28237_Unigene_45847	http://www.genome.jp/kegg-bin/show_pathway?ath00310/ath:AT1G73100%09red
Cutin, suberine and wax biosynthesis	KEGG PATHWAY	ath00073	1	28	0.225542	0.585944	CDS_4277_Unigene_9161	http://www.genome.jp/kegg-bin/show_pathway?ath00073/ath:AT5G41040%09red
Biosynthesis of secondary metabolites	KEGG PATHWAY	ath01110	12	1076	0.248623	0.585944	CDS_155_Unigene_260|CDS_12091_Unigene_22268|CDS_1821_Unigene_3813|CDS_23862_Unigene_39529|CDS_32509_Unigene_54940|CDS_8884_Unigene_17348|CDS_2375_Unigene_4909|CDS_31992_Unigene_53697|CDS_27465_Unigene_44728|CDS_2954_Unigene_6243|CDS_29595_Unigene_47751|CDS_9705_Unigene_18624	http://www.genome.jp/kegg-bin/show_pathway?ath01110/ath:AT4G14930%09red/ath:AT4G17260%09red/ath:AT4G31500%09red/ath:AT2G41480%09red/ath:AT1G12550%09red/ath:AT2G24210%09red/ath:AT1G77120%09red/ath:AT5G56760%09red/ath:AT4G36220%09red/ath:AT2G44520%09red/ath:AT5G07990%09red/ath:AT1G55920%09red
Propanoate metabolism	KEGG PATHWAY	ath00640	1	33	0.258949	0.585944	CDS_32509_Unigene_54940	http://www.genome.jp/kegg-bin/show_pathway?ath00640/ath:AT4G17260%09red
alpha-Linolenic acid metabolism	KEGG PATHWAY	ath00592	1	36	0.278301	0.585944	CDS_8884_Unigene_17348	http://www.genome.jp/kegg-bin/show_pathway?ath00592/ath:AT1G77120%09red
Glycolysis / Gluconeogenesis	KEGG PATHWAY	ath00010	2	117	0.280398	0.585944	CDS_32509_Unigene_54940|CDS_8884_Unigene_17348	http://www.genome.jp/kegg-bin/show_pathway?ath00010/ath:AT4G17260%09red/ath:AT1G77120%09red
Tyrosine metabolism	KEGG PATHWAY	ath00350	1	40	0.303322	0.585944	CDS_8884_Unigene_17348	http://www.genome.jp/kegg-bin/show_pathway?ath00350/ath:AT1G77120%09red
Fatty acid degradation	KEGG PATHWAY	ath00071	1	41	0.309442	0.585944	CDS_8884_Unigene_17348	http://www.genome.jp/kegg-bin/show_pathway?ath00071/ath:AT1G77120%09red
Ascorbate and aldarate metabolism	KEGG PATHWAY	ath00053	1	41	0.309442	0.585944	CDS_31824_Unigene_53371	http://www.genome.jp/kegg-bin/show_pathway?ath00053/ath:AT1G55570%09red
Nitrogen metabolism	KEGG PATHWAY	ath00910	1	42	0.315507	0.585944	CDS_30582_Unigene_50392	http://www.genome.jp/kegg-bin/show_pathway?ath00910/ath:AT5G14570%09red
RNA polymerase	KEGG PATHWAY	ath03020	1	45	0.333388	0.585944	CDS_20546_Unigene_34806	http://www.genome.jp/kegg-bin/show_pathway?ath03020/ath:AT4G25180%09red
Tryptophan metabolism	KEGG PATHWAY	ath00380	1	46	0.339244	0.585944	CDS_155_Unigene_260	http://www.genome.jp/kegg-bin/show_pathway?ath00380/ath:AT4G31500%09red
Porphyrin and chlorophyll metabolism	KEGG PATHWAY	ath00860	1	48	0.350803	0.585944	CDS_29595_Unigene_47751	http://www.genome.jp/kegg-bin/show_pathway?ath00860/ath:AT2G44520%09red
Endocytosis	KEGG PATHWAY	ath04144	2	142	0.360639	0.585944	CDS_22097_Unigene_36969|CDS_7274_Unigene_14547	http://www.genome.jp/kegg-bin/show_pathway?ath04144/ath:AT1G34220%09red/ath:AT1G15130%09red
Glycerolipid metabolism	KEGG PATHWAY	ath00561	1	53	0.378827	0.585944	CDS_19183_Unigene_32933	http://www.genome.jp/kegg-bin/show_pathway?ath00561/ath:AT1G73480%09red
Galactose metabolism	KEGG PATHWAY	ath00052	1	55	0.389696	0.585944	CDS_21291_Unigene_35874	http://www.genome.jp/kegg-bin/show_pathway?ath00052/ath:AT5G40390%09red
Proteasome	KEGG PATHWAY	ath03050	1	58	0.405646	0.585944	CDS_31069_Unigene_51682	http://www.genome.jp/kegg-bin/show_pathway?ath03050/ath:AT2G20580%09red
Phenylpropanoid biosynthesis	KEGG PATHWAY	ath00940	2	157	0.407248	0.585944	CDS_2954_Unigene_6243|CDS_2375_Unigene_4909	http://www.genome.jp/kegg-bin/show_pathway?ath00940/ath:AT2G41480%09red/ath:AT4G36220%09red
Purine metabolism	KEGG PATHWAY	ath00230	2	158	0.410299	0.585944	CDS_20546_Unigene_34806|CDS_9705_Unigene_18624	http://www.genome.jp/kegg-bin/show_pathway?ath00230/ath:AT4G25180%09red/ath:AT4G14930%09red
Carbon metabolism	KEGG PATHWAY	ath01200	3	262	0.411131	0.585944	CDS_31992_Unigene_53697|CDS_12091_Unigene_22268|CDS_1821_Unigene_3813	http://www.genome.jp/kegg-bin/show_pathway?ath01200/ath:AT1G12550%09red/ath:AT5G56760%09red/ath:AT1G55920%09red
Oxidative phosphorylation	KEGG PATHWAY	ath00190	2	162	0.422425	0.585944	CDS_29595_Unigene_47751|CDS_27727_Unigene_45068	http://www.genome.jp/kegg-bin/show_pathway?ath00190/ath:AT2G44520%09red/ath:AT5G08690%09red
Glycine, serine and threonine metabolism	KEGG PATHWAY	ath00260	1	72	0.47476	0.605988	CDS_12091_Unigene_22268	http://www.genome.jp/kegg-bin/show_pathway?ath00260/ath:AT1G12550%09red
Glyoxylate and dicarboxylate metabolism	KEGG PATHWAY	ath00630	1	74	0.483957	0.605988	CDS_12091_Unigene_22268	http://www.genome.jp/kegg-bin/show_pathway?ath00630/ath:AT1G12550%09red
2-Oxocarboxylic acid metabolism	KEGG PATHWAY	ath01210	1	74	0.483957	0.605988	CDS_155_Unigene_260	http://www.genome.jp/kegg-bin/show_pathway?ath01210/ath:AT4G31500%09red
Spliceosome	KEGG PATHWAY	ath03040	2	192	0.508922	0.605988	CDS_15372_Unigene_27384|CDS_32552_Unigene_55036	http://www.genome.jp/kegg-bin/show_pathway?ath03040/ath:AT5G14610%09red/ath:AT5G37370%09red
Pyruvate metabolism	KEGG PATHWAY	ath00620	1	85	0.531747	0.605988	CDS_32509_Unigene_54940	http://www.genome.jp/kegg-bin/show_pathway?ath00620/ath:AT4G17260%09red
Starch and sucrose metabolism	KEGG PATHWAY	ath00500	2	202	0.535833	0.605988	CDS_27223_Unigene_44379|CDS_9585_Unigene_18442	http://www.genome.jp/kegg-bin/show_pathway?ath00500/ath:AT2G01630%09red/ath:AT1G06410%09red
Peroxisome	KEGG PATHWAY	ath04146	1	87	0.53995	0.605988	CDS_3050_Unigene_6456	http://www.genome.jp/kegg-bin/show_pathway?ath04146/ath:AT4G33905%09red
Protein processing in endoplasmic reticulum	KEGG PATHWAY	ath04141	2	212	0.561718	0.605988	CDS_16014_Unigene_28318|CDS_1488_Unigene_3161	http://www.genome.jp/kegg-bin/show_pathway?ath04141/ath:AT5G12020%09red/ath:AT1G52560%09red
Glutathione metabolism	KEGG PATHWAY	ath00480	1	93	0.56371	0.605988	CDS_15813_Unigene_28001	http://www.genome.jp/kegg-bin/show_pathway?ath00480/ath:AT2G29420%09red
Biosynthesis of amino acids	KEGG PATHWAY	ath01230	2	255	0.661079	0.693327	CDS_31992_Unigene_53697|CDS_1821_Unigene_3813	http://www.genome.jp/kegg-bin/show_pathway?ath01230/ath:AT5G56760%09red/ath:AT1G55920%09red
Metabolic pathways	KEGG PATHWAY	ath01100	15	1910	0.719254	0.736379	CDS_12091_Unigene_22268|CDS_27727_Unigene_45068|CDS_1821_Unigene_3813|CDS_23862_Unigene_39529|CDS_27223_Unigene_44379|CDS_32509_Unigene_54940|CDS_8884_Unigene_17348|CDS_2375_Unigene_4909|CDS_31992_Unigene_53697|CDS_20546_Unigene_34806|CDS_2954_Unigene_6243|CDS_29595_Unigene_47751|CDS_9705_Unigene_18624|CDS_31824_Unigene_53371|CDS_19183_Unigene_32933	http://www.genome.jp/kegg-bin/show_pathway?ath01100/ath:AT4G25180%09red/ath:AT4G14930%09red/ath:AT4G17260%09red/ath:AT2G41480%09red/ath:AT1G12550%09red/ath:AT2G44520%09red/ath:AT1G06410%09red/ath:AT1G77120%09red/ath:AT1G73480%09red/ath:AT5G08690%09red/ath:AT4G36220%09red/ath:AT5G07990%09red/ath:AT1G55570%09red/ath:AT1G55920%09red/ath:AT5G56760%09red
RNA transport	KEGG PATHWAY	ath03013	1	169	0.777347	0.777347	CDS_13196_Unigene_24036	http://www.genome.jp/kegg-bin/show_pathway?ath03013/ath:AT1G07940%09red
#Term	Database	ID	Input number	Background number	P-Value	Corrected P-Value	Input	Hyperlink
#Term	Database	ID	Input number	Background number	P-Value	Corrected P-Value	Input	Hyperlink

## Sheet: COLD Down-regulated
#Term	Database	ID	Input number	Background number	P-Value	Corrected P-Value	Input	Hyperlink
Other glycan degradation	KEGG PATHWAY	ath00511	2	18	0.013629	0.357031	CDS_6903_Unigene_13909|CDS_5000_Unigene_10379	http://www.genome.jp/kegg-bin/show_pathway?ath00511/ath:AT3G54440%09red/ath:AT5G66150%09red
RNA transport	KEGG PATHWAY	ath03013	5	169	0.0204414	0.357031	CDS_11242_Unigene_20968|CDS_1213_Unigene_2469|CDS_12420_Unigene_22825|CDS_32455_Unigene_54843|CDS_13358_Unigene_24305	http://www.genome.jp/kegg-bin/show_pathway?ath03013/ath:AT2G05120%09red/ath:AT3G60240%09red/ath:AT1G33410%09red/ath:AT5G18410%09red/ath:AT1G79280%09red
ABC transporters	KEGG PATHWAY	ath02010	2	26	0.0258763	0.357031	CDS_9370_Unigene_18110|CDS_2806_Unigene_5994	http://www.genome.jp/kegg-bin/show_pathway?ath02010/ath:AT2G41700%09red/ath:AT2G36910%09red
Photosynthesis	KEGG PATHWAY	ath00195	3	77	0.0351539	0.357031	CDS_853_Unigene_1564|CDS_2482_Unigene_5166|CDS_15311_Unigene_27287	http://www.genome.jp/kegg-bin/show_pathway?ath00195/ath:AT5G45040%09red/ath:AT1G30510%09red/ath:AT1G20020%09red
Amino sugar and nucleotide sugar metabolism	KEGG PATHWAY	ath00520	4	135	0.0365714	0.357031	CDS_20715_Unigene_35084|CDS_361_Unigene_620|CDS_30487_Unigene_50233|CDS_1527_Unigene_3251	http://www.genome.jp/kegg-bin/show_pathway?ath00520/ath:AT2G35020%09red/ath:AT1G02730%09red/ath:AT5G48300%09red/ath:AT3G25140%09red
Starch and sucrose metabolism	KEGG PATHWAY	ath00500	5	202	0.0389671	0.357031	CDS_361_Unigene_620|CDS_7135_Unigene_14317|CDS_32484_Unigene_54888|CDS_30487_Unigene_50233|CDS_1527_Unigene_3251	http://www.genome.jp/kegg-bin/show_pathway?ath00500/ath:AT3G29320%09red/ath:AT1G02730%09red/ath:AT5G48300%09red/ath:AT3G25140%09red/ath:AT3G46970%09red
Pyruvate metabolism	KEGG PATHWAY	ath00620	3	85	0.0446043	0.357031	CDS_11965_Unigene_22049|CDS_7940_Unigene_15759|CDS_24543_Unigene_40452	http://www.genome.jp/kegg-bin/show_pathway?ath00620/ath:AT1G68750%09red/ath:AT2G36580%09red/ath:AT4G36250%09red
alpha-Linolenic acid metabolism	KEGG PATHWAY	ath00592	2	36	0.0454111	0.357031	CDS_5194_Unigene_10725|CDS_9256_Unigene_17935	http://www.genome.jp/kegg-bin/show_pathway?ath00592/ath:AT1G72520%09red/ath:AT5G42650%09red
Fatty acid degradation	KEGG PATHWAY	ath00071	2	41	0.0566717	0.357031	CDS_24543_Unigene_40452|CDS_6228_Unigene_12525	http://www.genome.jp/kegg-bin/show_pathway?ath00071/ath:AT4G36250%09red/ath:AT2G47240%09red
Fatty acid biosynthesis	KEGG PATHWAY	ath00061	2	41	0.0566717	0.357031	CDS_484_Unigene_870|CDS_6228_Unigene_12525	http://www.genome.jp/kegg-bin/show_pathway?ath00061/ath:AT2G05990%09red/ath:AT2G47240%09red
DNA replication	KEGG PATHWAY	ath03030	2	50	0.0790301	0.416009	CDS_5932_Unigene_12046|CDS_31440_Unigene_52319	http://www.genome.jp/kegg-bin/show_pathway?ath03030/ath:AT5G44635%09red/ath:AT1G44900%09red
Linoleic acid metabolism	KEGG PATHWAY	ath00591	1	9	0.085986	0.416009	CDS_9256_Unigene_17935	http://www.genome.jp/kegg-bin/show_pathway?ath00591/ath:AT1G72520%09red
Basal transcription factors	KEGG PATHWAY	ath03022	2	55	0.0924465	0.416009	CDS_6612_Unigene_13307|CDS_13104_Unigene_23866	http://www.genome.jp/kegg-bin/show_pathway?ath03022/ath:AT4G17020%09red/ath:AT1G17440%09red
Galactose metabolism	KEGG PATHWAY	ath00052	2	55	0.0924465	0.416009	CDS_6903_Unigene_13909|CDS_12971_Unigene_23648	http://www.genome.jp/kegg-bin/show_pathway?ath00052/ath:AT3G54440%09red/ath:AT1G55740%09red
Metabolic pathways	KEGG PATHWAY	ath01100	23	1910	0.099786	0.419101	CDS_30487_Unigene_50233|CDS_12820_Unigene_23388|CDS_5980_Unigene_12118|CDS_2482_Unigene_5166|CDS_4541_Unigene_9637|CDS_5674_Unigene_11539|CDS_5194_Unigene_10725|CDS_6228_Unigene_12525|CDS_7135_Unigene_14317|CDS_9197_Unigene_17844|CDS_6903_Unigene_13909|CDS_1527_Unigene_3251|CDS_32484_Unigene_54888|CDS_7973_Unigene_15850|CDS_11965_Unigene_22049|CDS_9256_Unigene_17935|CDS_7940_Unigene_15759|CDS_853…	http://www.genome.jp/kegg-bin/show_pathway?ath01100/ath:AT4G37980%09red/ath:AT4G36250%09red/ath:AT1G20020%09red/ath:AT2G47240%09red/ath:AT2G05990%09red/ath:AT1G49820%09red/ath:AT1G60550%09red/ath:AT1G30510%09red/ath:AT3G54440%09red/ath:AT1G02730%09red/ath:AT5G42650%09red/ath:AT3G27060%09red/ath:AT3G46970%09red/ath:AT3G29320%09red/ath:AT2G35020%09red/ath:AT1G49340%09red/ath:AT1G68750%09red/ath:AT5…
Biotin metabolism	KEGG PATHWAY	ath00780	1	14	0.126176	0.444341	CDS_484_Unigene_870	http://www.genome.jp/kegg-bin/show_pathway?ath00780/ath:AT2G05990%09red
Monobactam biosynthesis	KEGG PATHWAY	ath00261	1	14	0.126176	0.444341	CDS_5674_Unigene_11539	http://www.genome.jp/kegg-bin/show_pathway?ath00261/ath:AT2G45440%09red
Fatty acid metabolism	KEGG PATHWAY	ath01212	2	67	0.126955	0.444341	CDS_484_Unigene_870|CDS_6228_Unigene_12525	http://www.genome.jp/kegg-bin/show_pathway?ath01212/ath:AT2G05990%09red/ath:AT2G47240%09red
Ubiquitin mediated proteolysis	KEGG PATHWAY	ath04120	3	142	0.141182	0.446528	CDS_7813_Unigene_15475|CDS_5448_Unigene_11123|CDS_7186_Unigene_14398	http://www.genome.jp/kegg-bin/show_pathway?ath04120/ath:AT1G70320%09red/ath:AT3G15355%09red/ath:AT5G02880%09red
Lysine biosynthesis	KEGG PATHWAY	ath00300	1	16	0.141755	0.446528	CDS_5674_Unigene_11539	http://www.genome.jp/kegg-bin/show_pathway?ath00300/ath:AT2G45440%09red
Histidine metabolism	KEGG PATHWAY	ath00340	1	18	0.157057	0.471171	CDS_24543_Unigene_40452	http://www.genome.jp/kegg-bin/show_pathway?ath00340/ath:AT4G36250%09red
AGE-RAGE signaling pathway in diabetic complications	KEGG PATHWAY	ath04933	1	20	0.172087	0.48893	CDS_18617_Unigene_32077	http://www.genome.jp/kegg-bin/show_pathway?ath04933/ath:AT1G75840%09red
Biosynthesis of secondary metabolites	KEGG PATHWAY	ath01110	13	1076	0.179949	0.48893	CDS_6624_Unigene_13334|CDS_7135_Unigene_14317|CDS_9256_Unigene_17935|CDS_30487_Unigene_50233|CDS_12820_Unigene_23388|CDS_32484_Unigene_54888|CDS_24543_Unigene_40452|CDS_9197_Unigene_17844|CDS_5674_Unigene_11539|CDS_5194_Unigene_10725|CDS_7973_Unigene_15850|CDS_29870_Unigene_48315|CDS_11965_Unigene_22049	http://www.genome.jp/kegg-bin/show_pathway?ath01110/ath:AT4G37980%09red/ath:AT4G36250%09red/ath:AT5G48300%09red/ath:AT3G46970%09red/ath:AT5G42650%09red/ath:AT2G45440%09red/ath:AT2G36580%09red/ath:AT1G60550%09red/ath:AT3G29320%09red/ath:AT2G41540%09red/ath:AT2G27150%09red/ath:AT5G04900%09red/ath:AT1G72520%09red
Phagosome	KEGG PATHWAY	ath04145	2	86	0.186259	0.48893	CDS_433_Unigene_785|CDS_18617_Unigene_32077	http://www.genome.jp/kegg-bin/show_pathway?ath04145/ath:AT5G12250%09red/ath:AT1G75840%09red
Sphingolipid metabolism	KEGG PATHWAY	ath00600	1	26	0.215595	0.513749	CDS_6903_Unigene_13909	http://www.genome.jp/kegg-bin/show_pathway?ath00600/ath:AT3G54440%09red
Lysine degradation	KEGG PATHWAY	ath00310	1	26	0.215595	0.513749	CDS_24543_Unigene_40452	http://www.genome.jp/kegg-bin/show_pathway?ath00310/ath:AT4G36250%09red
Cutin, suberine and wax biosynthesis	KEGG PATHWAY	ath00073	1	28	0.229586	0.513749	CDS_11827_Unigene_21842	http://www.genome.jp/kegg-bin/show_pathway?ath00073/ath:AT3G10570%09red
Ribosome biogenesis in eukaryotes	KEGG PATHWAY	ath03008	2	100	0.231999	0.513749	CDS_5281_Unigene_10866|CDS_29181_Unigene_47167	http://www.genome.jp/kegg-bin/show_pathway?ath03008/ath:AT1G67120%09red/ath:AT1G75660%09red
Carotenoid biosynthesis	KEGG PATHWAY	ath00906	1	29	0.236488	0.513749	CDS_7973_Unigene_15850	http://www.genome.jp/kegg-bin/show_pathway?ath00906/ath:AT2G27150%09red
Ubiquinone and other terpenoid-quinone biosynthesis	KEGG PATHWAY	ath00130	1	35	0.276624	0.547827	CDS_29870_Unigene_48315	http://www.genome.jp/kegg-bin/show_pathway?ath00130/ath:AT1G60550%09red
mRNA surveillance pathway	KEGG PATHWAY	ath03015	2	114	0.278339	0.547827	CDS_6671_Unigene_13472|CDS_6672_Unigene_13473	http://www.genome.jp/kegg-bin/show_pathway?ath03015/ath:AT5G25510%09red
Aminoacyl-tRNA biosynthesis	KEGG PATHWAY	ath00970	2	115	0.28165	0.547827	CDS_30287_Unigene_49403|CDS_9987_Unigene_19068	http://www.genome.jp/kegg-bin/show_pathway?ath00970/ath:AT2G25840%09red/ath:AT1G29880%09red
Glycolysis / Gluconeogenesis	KEGG PATHWAY	ath00010	2	117	0.288269	0.547827	CDS_11965_Unigene_22049|CDS_24543_Unigene_40452	http://www.genome.jp/kegg-bin/show_pathway?ath00010/ath:AT2G36580%09red/ath:AT4G36250%09red
Mismatch repair	KEGG PATHWAY	ath03430	1	39	0.302207	0.547827	CDS_30628_Unigene_50444	http://www.genome.jp/kegg-bin/show_pathway?ath03430/ath:AT4G02070%09red
beta-Alanine metabolism	KEGG PATHWAY	ath00410	1	40	0.308461	0.547827	CDS_24543_Unigene_40452	http://www.genome.jp/kegg-bin/show_pathway?ath00410/ath:AT4G36250%09red
Ascorbate and aldarate metabolism	KEGG PATHWAY	ath00053	1	41	0.314659	0.547827	CDS_24543_Unigene_40452	http://www.genome.jp/kegg-bin/show_pathway?ath00053/ath:AT4G36250%09red
Base excision repair	KEGG PATHWAY	ath03410	1	43	0.326889	0.547827	CDS_7439_Unigene_14846	http://www.genome.jp/kegg-bin/show_pathway?ath03410/ath:AT2G31320%09red
Limonene and pinene degradation	KEGG PATHWAY	ath00903	1	44	0.332923	0.547827	CDS_24543_Unigene_40452	http://www.genome.jp/kegg-bin/show_pathway?ath00903/ath:AT4G36250%09red
Tryptophan metabolism	KEGG PATHWAY	ath00380	1	46	0.344828	0.547827	CDS_24543_Unigene_40452	http://www.genome.jp/kegg-bin/show_pathway?ath00380/ath:AT4G36250%09red
Valine, leucine and isoleucine degradation	KEGG PATHWAY	ath00280	1	48	0.356522	0.547827	CDS_24543_Unigene_40452	http://www.genome.jp/kegg-bin/show_pathway?ath00280/ath:AT4G36250%09red
Porphyrin and chlorophyll metabolism	KEGG PATHWAY	ath00860	1	48	0.356522	0.547827	CDS_9197_Unigene_17844	http://www.genome.jp/kegg-bin/show_pathway?ath00860/ath:AT5G04900%09red
Arginine and proline metabolism	KEGG PATHWAY	ath00330	1	53	0.384856	0.563859	CDS_24543_Unigene_40452	http://www.genome.jp/kegg-bin/show_pathway?ath00330/ath:AT4G36250%09red
Glycerolipid metabolism	KEGG PATHWAY	ath00561	1	53	0.384856	0.563859	CDS_24543_Unigene_40452	http://www.genome.jp/kegg-bin/show_pathway?ath00561/ath:AT4G36250%09red
Purine metabolism	KEGG PATHWAY	ath00230	2	158	0.420204	0.600989	CDS_11965_Unigene_22049|CDS_30669_Unigene_50503	http://www.genome.jp/kegg-bin/show_pathway?ath00230/ath:AT2G36580%09red/ath:AT3G27060%09red
Plant hormone signal transduction	KEGG PATHWAY	ath04075	3	271	0.444935	0.600989	CDS_18546_Unigene_31955|CDS_2626_Unigene_5568|CDS_2983_Unigene_6297	http://www.genome.jp/kegg-bin/show_pathway?ath04075/ath:AT5G65670%09red/ath:AT3G21510%09red/ath:AT5G46570%09red
Phosphatidylinositol signaling system	KEGG PATHWAY	ath04070	1	68	0.462615	0.600989	CDS_5980_Unigene_12118	http://www.genome.jp/kegg-bin/show_pathway?ath04070/ath:AT1G49340%09red
Inositol phosphate metabolism	KEGG PATHWAY	ath00562	1	68	0.462615	0.600989	CDS_5980_Unigene_12118	http://www.genome.jp/kegg-bin/show_pathway?ath00562/ath:AT1G49340%09red
Nucleotide excision repair	KEGG PATHWAY	ath03420	1	69	0.467436	0.600989	CDS_13104_Unigene_23866	http://www.genome.jp/kegg-bin/show_pathway?ath03420/ath:AT4G17020%09red
Carbon fixation in photosynthetic organisms	KEGG PATHWAY	ath00710	1	69	0.467436	0.600989	CDS_7940_Unigene_15759	http://www.genome.jp/kegg-bin/show_pathway?ath00710/ath:AT1G68750%09red
Pentose and glucuronate interconversions	KEGG PATHWAY	ath00040	1	81	0.522037	0.657766	CDS_24543_Unigene_40452	http://www.genome.jp/kegg-bin/show_pathway?ath00040/ath:AT4G36250%09red
Glycerophospholipid metabolism	KEGG PATHWAY	ath00564	1	86	0.543107	0.662964	CDS_6624_Unigene_13334	http://www.genome.jp/kegg-bin/show_pathway?ath00564/ath:AT2G41540%09red
Peroxisome	KEGG PATHWAY	ath04146	1	87	0.547209	0.662964	CDS_6228_Unigene_12525	http://www.genome.jp/kegg-bin/show_pathway?ath04146/ath:AT2G47240%09red
Glutathione metabolism	KEGG PATHWAY	ath00480	1	93	0.57106	0.678807	CDS_30669_Unigene_50503	http://www.genome.jp/kegg-bin/show_pathway?ath00480/ath:AT3G27060%09red
Cysteine and methionine metabolism	KEGG PATHWAY	ath00270	1	112	0.638639	0.731532	CDS_4541_Unigene_9637	http://www.genome.jp/kegg-bin/show_pathway?ath00270/ath:AT1G49820%09red
RNA degradation	KEGG PATHWAY	ath03018	1	112	0.638639	0.731532	CDS_29181_Unigene_47167	http://www.genome.jp/kegg-bin/show_pathway?ath03018/ath:AT1G75660%09red
Pyrimidine metabolism	KEGG PATHWAY	ath00240	1	116	0.651454	0.732886	CDS_30669_Unigene_50503	http://www.genome.jp/kegg-bin/show_pathway?ath00240/ath:AT3G27060%09red
Biosynthesis of amino acids	KEGG PATHWAY	ath01230	2	255	0.671871	0.742594	CDS_11965_Unigene_22049|CDS_5674_Unigene_11539	http://www.genome.jp/kegg-bin/show_pathway?ath01230/ath:AT2G36580%09red/ath:AT2G45440%09red
Carbon metabolism	KEGG PATHWAY	ath01200	2	262	0.686132	0.745281	CDS_11965_Unigene_22049|CDS_7940_Unigene_15759	http://www.genome.jp/kegg-bin/show_pathway?ath01200/ath:AT1G68750%09red/ath:AT2G36580%09red
Phenylpropanoid biosynthesis	KEGG PATHWAY	ath00940	1	157	0.759346	0.805731	CDS_12820_Unigene_23388	http://www.genome.jp/kegg-bin/show_pathway?ath00940/ath:AT4G37980%09red
Oxidative phosphorylation	KEGG PATHWAY	ath00190	1	162	0.769983	0.805731	CDS_5291_Unigene_10885	http://www.genome.jp/kegg-bin/show_pathway?ath00190/ath:AT5G62670%09red
Plant-pathogen interaction	KEGG PATHWAY	ath04626	1	167	0.780153	0.805731	CDS_9699_Unigene_18616	http://www.genome.jp/kegg-bin/show_pathway?ath04626/ath:AT5G46330%09red
Protein processing in endoplasmic reticulum	KEGG PATHWAY	ath04141	1	212	0.853708	0.867478	CDS_14391_Unigene_25848	http://www.genome.jp/kegg-bin/show_pathway?ath04141/ath:AT1G71220%09red
Ribosome	KEGG PATHWAY	ath03010	1	363	0.962891	0.962891	CDS_7313_Unigene_14621	http://www.genome.jp/kegg-bin/show_pathway?ath03010/ath:AT1G71720%09red
#Term	Database	ID	Input number	Background number	P-Value	Corrected P-Value	Input	Hyperlink
#Term	Database	ID	Input number	Background number	P-Value	Corrected P-Value	Input	Hyperlink
--------------------
--------------------
--------------------

## Sheet: FLOOD Up-regulated
#Term	Database	ID	Input number	Background number	P-Value	Corrected P-Value	Input	Hyperlink
Biosynthesis of secondary metabolites	KEGG PATHWAY	ath01110	54	1076	1.89206e-06	0.00017407	CDS_19724_Unigene_32504|CDS_32315_Unigene_50901|CDS_1921_Unigene_4179|CDS_28882_Unigene_46021|CDS_19720_Unigene_32497|CDS_13826_Unigene_24052|CDS_32528_Unigene_51218|CDS_22869_Unigene_37260|CDS_24207_Unigene_39205|CDS_15371_Unigene_26397|CDS_30541_Unigene_48437|CDS_24084_Unigene_39030|CDS_6338_Unigene_12349|CDS_24286_Unigene_39344|CDS_5958_Unigene_11766|CDS_28423_Unigene_45350|CDS_865_Unigene_194…	http://www.genome.jp/kegg-bin/show_pathway?ath01110/ath:AT1G44446%09red/ath:AT5G04660%09red/ath:AT5G13110%09red/ath:AT4G36250%09red/ath:AT5G50850%09red/ath:AT2G44520%09red/ath:AT1G68530%09red/ath:AT1G12550%09red/ath:AT4G39330%09red/ath:AT1G63050%09red/ath:AT1G53240%09red/ath:AT3G30775%09red/ath:AT1G01710%09red/ath:AT4G18440%09red/ath:AT5G36220%09red/ath:AT3G01180%09red/ath:AT4G22756%09red/ath:AT3…
Carbon fixation in photosynthetic organisms	KEGG PATHWAY	ath00710	9	69	0.000112286	0.00516515	CDS_32315_Unigene_50901|CDS_17997_Unigene_30145|CDS_24284_Unigene_39342|CDS_21770_Unigene_35648|CDS_15315_Unigene_26309|CDS_16880_Unigene_28505|CDS_27159_Unigene_43484|CDS_24286_Unigene_39344|CDS_33231_Unigene_52786	http://www.genome.jp/kegg-bin/show_pathway?ath00710/ath:AT3G60750%09red/ath:AT1G53310%09red/ath:AT4G15530%09red/ath:AT3G15020%09red/ath:AT1G56190%09red/ath:AT1G53240%09red/ath:AT3G54050%09red/ath:AT5G44520%09red/ath:AT4G38970%09red
Carbon metabolism	KEGG PATHWAY	ath01200	17	262	0.000508606	0.0150495	CDS_1743_Unigene_3727|CDS_32315_Unigene_50901|CDS_977_Unigene_2086|CDS_33231_Unigene_52786|CDS_24284_Unigene_39342|CDS_15275_Unigene_26247|CDS_341_Unigene_747|CDS_27159_Unigene_43484|CDS_15371_Unigene_26397|CDS_16880_Unigene_28505|CDS_21770_Unigene_35648|CDS_25788_Unigene_41519|CDS_24286_Unigene_39344|CDS_26664_Unigene_42783|CDS_28423_Unigene_45350|CDS_15315_Unigene_26309|CDS_17997_Unigene_30145	http://www.genome.jp/kegg-bin/show_pathway?ath01200/ath:AT2G24270%09red/ath:AT3G60750%09red/ath:AT1G53310%09red/ath:AT5G13110%09red/ath:AT3G15020%09red/ath:AT5G50850%09red/ath:AT4G15530%09red/ath:AT1G12550%09red/ath:AT4G34200%09red/ath:AT5G56350%09red/ath:AT5G61580%09red/ath:AT5G56760%09red/ath:AT1G56190%09red/ath:AT1G53240%09red/ath:AT3G54050%09red/ath:AT5G44520%09red/ath:AT4G38970%09red
Galactose metabolism	KEGG PATHWAY	ath00052	7	55	0.000736504	0.0150495	CDS_11325_Unigene_20297|CDS_5713_Unigene_11268|CDS_14826_Unigene_25545|CDS_26281_Unigene_42238|CDS_8558_Unigene_15811|CDS_8262_Unigene_15365|CDS_28423_Unigene_45350	http://www.genome.jp/kegg-bin/show_pathway?ath00052/ath:AT5G52560%09red/ath:AT1G12780%09red/ath:AT2G47180%09red/ath:AT5G61580%09red/ath:AT3G45940%09red/ath:AT5G20250%09red/ath:AT3G57520%09red
Pentose phosphate pathway	KEGG PATHWAY	ath00030	7	58	0.000979543	0.0150495	CDS_1743_Unigene_3727|CDS_21770_Unigene_35648|CDS_17997_Unigene_30145|CDS_15275_Unigene_26247|CDS_15315_Unigene_26309|CDS_16880_Unigene_28505|CDS_28423_Unigene_45350	http://www.genome.jp/kegg-bin/show_pathway?ath00030/ath:AT2G24270%09red/ath:AT3G60750%09red/ath:AT5G13110%09red/ath:AT5G61580%09red/ath:AT3G54050%09red/ath:AT5G44520%09red/ath:AT4G38970%09red
Metabolic pathways	KEGG PATHWAY	ath01100	70	1910	0.00098149	0.0150495	CDS_19724_Unigene_32504|CDS_32315_Unigene_50901|CDS_1921_Unigene_4179|CDS_28882_Unigene_46021|CDS_26281_Unigene_42238|CDS_17956_Unigene_30090|CDS_13826_Unigene_24052|CDS_32528_Unigene_51218|CDS_22869_Unigene_37260|CDS_24207_Unigene_39205|CDS_15371_Unigene_26397|CDS_30541_Unigene_48437|CDS_24084_Unigene_39030|CDS_6338_Unigene_12349|CDS_24286_Unigene_39344|CDS_5958_Unigene_11766|CDS_28423_Unigene_4…	http://www.genome.jp/kegg-bin/show_pathway?ath01100/ath:AT2G24270%09red/ath:AT5G04660%09red/ath:AT5G50850%09red/ath:AT5G13110%09red/ath:AT4G36250%09red/ath:AT3G55260%09red/ath:AT5G67100%09red/ath:AT4G19010%09red/ath:AT5G41480%09red/ath:AT1G12550%09red/ath:AT4G39330%09red/ath:AT5G52560%09red/ath:AT1G53240%09red/ath:AT5G01220%09red/ath:AT3G30775%09red/ath:AT1G67560%09red/ath:AT1G01710%09red/ath:AT3…
Stilbenoid, diarylheptanoid and gingerol biosynthesis	KEGG PATHWAY	ath00945	6	46	0.00156335	0.0205469	CDS_3248_Unigene_6522|CDS_10326_Unigene_18617|CDS_14862_Unigene_25600|CDS_24207_Unigene_39205|CDS_6338_Unigene_12349|CDS_1921_Unigene_4179	http://www.genome.jp/kegg-bin/show_pathway?ath00945/ath:AT5G04660%09red/ath:AT2G40890%09red/ath:AT3G26280%09red/ath:AT5G36220%09red/ath:AT4G31940%09red
Pyruvate metabolism	KEGG PATHWAY	ath00620	8	85	0.00190553	0.0219136	CDS_19724_Unigene_32504|CDS_24284_Unigene_39342|CDS_33231_Unigene_52786|CDS_15371_Unigene_26397|CDS_27159_Unigene_43484|CDS_19095_Unigene_31613|CDS_24286_Unigene_39344|CDS_26664_Unigene_42783	http://www.genome.jp/kegg-bin/show_pathway?ath00620/ath:AT5G56350%09red/ath:AT1G53310%09red/ath:AT4G36250%09red/ath:AT5G50850%09red/ath:AT4G15530%09red/ath:AT1G74040%09red/ath:AT1G53240%09red/ath:AT3G15020%09red
Flavonoid biosynthesis	KEGG PATHWAY	ath00941	4	21	0.00288261	0.0294667	CDS_662_Unigene_1540|CDS_3248_Unigene_6522|CDS_30541_Unigene_48437|CDS_24207_Unigene_39205	http://www.genome.jp/kegg-bin/show_pathway?ath00941/ath:AT2G40890%09red/ath:AT5G13930%09red/ath:AT5G07990%09red
Endocytosis	KEGG PATHWAY	ath04144	10	142	0.00404521	0.037216	CDS_13639_Unigene_23781|CDS_5588_Unigene_11017|CDS_21649_Unigene_35463|CDS_13826_Unigene_24052|CDS_17942_Unigene_30065|CDS_28253_Unigene_45103|CDS_34340_Unigene_55166|CDS_33127_Unigene_52646|CDS_32902_Unigene_52007|CDS_32045_Unigene_50549	http://www.genome.jp/kegg-bin/show_pathway?ath04144/ath:AT1G15130%09red/ath:AT1G13980%09red/ath:AT4G24280%09red/ath:AT3G53710%09red/ath:AT5G11710%09red/ath:AT3G12400%09red/ath:AT3G12580%09red/ath:AT1G59610%09red/ath:AT4G35790%09red
Limonene and pinene degradation	KEGG PATHWAY	ath00903	5	44	0.00651489	0.0544882	CDS_19724_Unigene_32504|CDS_1921_Unigene_4179|CDS_10326_Unigene_18617|CDS_6338_Unigene_12349|CDS_14862_Unigene_25600	http://www.genome.jp/kegg-bin/show_pathway?ath00903/ath:AT3G26280%09red/ath:AT5G04660%09red/ath:AT4G36250%09red/ath:AT5G36220%09red/ath:AT4G31940%09red
Glycolysis / Gluconeogenesis	KEGG PATHWAY	ath00010	8	117	0.0112842	0.086512	CDS_19724_Unigene_32504|CDS_32315_Unigene_50901|CDS_17997_Unigene_30145|CDS_15275_Unigene_26247|CDS_15315_Unigene_26309|CDS_15371_Unigene_26397|CDS_26664_Unigene_42783|CDS_28423_Unigene_45350	http://www.genome.jp/kegg-bin/show_pathway?ath00010/ath:AT2G24270%09red/ath:AT4G36250%09red/ath:AT5G50850%09red/ath:AT5G56350%09red/ath:AT5G61580%09red/ath:AT1G56190%09red/ath:AT3G54050%09red/ath:AT4G38970%09red
Fatty acid elongation	KEGG PATHWAY	ath00062	4	35	0.0143635	0.10165	CDS_15133_Unigene_26020|CDS_26904_Unigene_43130|CDS_17933_Unigene_30047|CDS_26896_Unigene_43123	http://www.genome.jp/kegg-bin/show_pathway?ath00062/ath:AT1G01710%09red/ath:AT1G68530%09red
Circadian rhythm - plant	KEGG PATHWAY	ath04712	4	36	0.015661	0.102915	CDS_662_Unigene_1540|CDS_1319_Unigene_3034|CDS_30967_Unigene_49032|CDS_16418_Unigene_27867	http://www.genome.jp/kegg-bin/show_pathway?ath04712/ath:AT1G22770%09red/ath:AT5G62430%09red/ath:AT5G13930%09red/ath:AT2G32950%09red
Spliceosome	KEGG PATHWAY	ath03040	10	192	0.026037	0.159693	CDS_3725_Unigene_7289|CDS_31256_Unigene_49409|CDS_5588_Unigene_11017|CDS_22639_Unigene_36894|CDS_29493_Unigene_46904|CDS_32157_Unigene_50718|CDS_33127_Unigene_52646|CDS_11737_Unigene_20966|CDS_19098_Unigene_31616|CDS_32902_Unigene_52007	http://www.genome.jp/kegg-bin/show_pathway?ath03040/ath:AT4G24280%09red/ath:AT1G04510%09red/ath:AT3G12580%09red/ath:AT3G15010%09red/ath:AT4G01020%09red/ath:AT1G27900%09red/ath:AT1G03140%09red/ath:AT1G80070%09red/ath:AT5G37370%09red
Linoleic acid metabolism	KEGG PATHWAY	ath00591	2	9	0.0278949	0.160396	CDS_17483_Unigene_29333|CDS_28882_Unigene_46021	http://www.genome.jp/kegg-bin/show_pathway?ath00591/ath:AT1G72520%09red/ath:AT1G67560%09red
Lysine degradation	KEGG PATHWAY	ath00310	3	26	0.0324369	0.175541	CDS_19724_Unigene_32504|CDS_19437_Unigene_32094|CDS_7868_Unigene_14800	http://www.genome.jp/kegg-bin/show_pathway?ath00310/ath:AT1G73100%09red/ath:AT4G33150%09red/ath:AT4G36250%09red
Cutin, suberine and wax biosynthesis	KEGG PATHWAY	ath00073	3	28	0.0385191	0.196875	CDS_19720_Unigene_32497|CDS_6201_Unigene_12138|CDS_27235_Unigene_43623	http://www.genome.jp/kegg-bin/show_pathway?ath00073/ath:AT5G41040%09red/ath:AT1G02205%09red
Plant hormone signal transduction	KEGG PATHWAY	ath04075	12	271	0.044219	0.214113	CDS_17352_Unigene_29167|CDS_17353_Unigene_29168|CDS_33648_Unigene_53632|CDS_34048_Unigene_54512|CDS_21861_Unigene_35757|CDS_1744_Unigene_3728|CDS_28_Unigene_61|CDS_17244_Unigene_29023|CDS_28893_Unigene_46030|CDS_14314_Unigene_24779|CDS_26843_Unigene_43043|CDS_27033_Unigene_43336	http://www.genome.jp/kegg-bin/show_pathway?ath04075/ath:AT2G25490%09red/ath:AT3G11410%09red/ath:AT4G39400%09red/ath:AT3G15540%09red/ath:AT3G23150%09red/ath:AT2G38120%09red/ath:AT2G47750%09red/ath:AT4G34160%09red/ath:AT2G39940%09red/ath:AT2G33860%09red/ath:AT1G32640%09red
Glycerolipid metabolism	KEGG PATHWAY	ath00561	4	53	0.0492482	0.226542	CDS_19724_Unigene_32504|CDS_24084_Unigene_39030|CDS_13229_Unigene_23160|CDS_1378_Unigene_3155	http://www.genome.jp/kegg-bin/show_pathway?ath00561/ath:AT1G63050%09red/ath:AT5G01220%09red/ath:AT5G13640%09red/ath:AT4G36250%09red
RNA degradation	KEGG PATHWAY	ath03018	6	112	0.0675896	0.282647	CDS_31572_Unigene_49878|CDS_23718_Unigene_38433|CDS_29043_Unigene_46251|CDS_19039_Unigene_31551|CDS_4288_Unigene_8350|CDS_28423_Unigene_45350	http://www.genome.jp/kegg-bin/show_pathway?ath03018/ath:AT3G13300%09red/ath:AT5G61580%09red/ath:AT2G30800%09red/ath:AT3G22270%09red/ath:AT2G01130%09red/ath:AT1G75660%09red
Cysteine and methionine metabolism	KEGG PATHWAY	ath00270	6	112	0.0675896	0.282647	CDS_24284_Unigene_39342|CDS_7005_Unigene_13423|CDS_17956_Unigene_30090|CDS_341_Unigene_747|CDS_24286_Unigene_39344|CDS_4276_Unigene_8314	http://www.genome.jp/kegg-bin/show_pathway?ath00270/ath:AT3G22740%09red/ath:AT3G08860%09red/ath:AT3G25570%09red/ath:AT5G56760%09red/ath:AT1G53240%09red/ath:AT3G15020%09red
Butanoate metabolism	KEGG PATHWAY	ath00650	2	17	0.0764194	0.305678	CDS_23369_Unigene_38009|CDS_22921_Unigene_37324	http://www.genome.jp/kegg-bin/show_pathway?ath00650/ath:AT2G26800%09red/ath:AT3G48560%09red
Other glycan degradation	KEGG PATHWAY	ath00511	2	18	0.083591	0.308206	CDS_3425_Unigene_6823|CDS_20910_Unigene_34380	http://www.genome.jp/kegg-bin/show_pathway?ath00511/ath:AT2G28100%09red/ath:AT3G55260%09red
Protein processing in endoplasmic reticulum	KEGG PATHWAY	ath04141	9	212	0.0903461	0.308206	CDS_905_Unigene_1987|CDS_5588_Unigene_11017|CDS_12757_Unigene_22451|CDS_4333_Unigene_8462|CDS_33127_Unigene_52646|CDS_33772_Unigene_53864|CDS_29979_Unigene_47657|CDS_32902_Unigene_52007|CDS_19753_Unigene_32545	http://www.genome.jp/kegg-bin/show_pathway?ath04141/ath:AT5G03340%09red/ath:AT4G24280%09red/ath:AT1G77510%09red/ath:AT3G16090%09red/ath:AT5G52640%09red/ath:AT3G12580%09red/ath:AT1G59860%09red/ath:AT1G05520%09red
Sulfur metabolism	KEGG PATHWAY	ath00920	3	41	0.0904517	0.308206	CDS_10672_Unigene_19241|CDS_3235_Unigene_6508|CDS_341_Unigene_747	http://www.genome.jp/kegg-bin/show_pathway?ath00920/ath:AT5G56760%09red/ath:AT4G21990%09red/ath:AT4G04610%09red
Ascorbate and aldarate metabolism	KEGG PATHWAY	ath00053	3	41	0.0904517	0.308206	CDS_19724_Unigene_32504|CDS_16742_Unigene_28313|CDS_26281_Unigene_42238	http://www.genome.jp/kegg-bin/show_pathway?ath00053/ath:AT5G52560%09red/ath:AT1G55570%09red/ath:AT4G36250%09red
Phenylpropanoid biosynthesis	KEGG PATHWAY	ath00940	7	157	0.10479	0.34431	CDS_24705_Unigene_39976|CDS_5957_Unigene_11765|CDS_11874_Unigene_21158|CDS_24207_Unigene_39205|CDS_3248_Unigene_6522|CDS_5958_Unigene_11766|CDS_865_Unigene_1944	http://www.genome.jp/kegg-bin/show_pathway?ath00940/ath:AT4G39330%09red/ath:AT5G66690%09red/ath:AT2G40890%09red/ath:AT4G19010%09red/ath:AT4G36220%09red
Biosynthesis of amino acids	KEGG PATHWAY	ath01230	10	255	0.112296	0.346061	CDS_32315_Unigene_50901|CDS_341_Unigene_747|CDS_15315_Unigene_26309|CDS_19095_Unigene_31613|CDS_16880_Unigene_28505|CDS_25788_Unigene_41519|CDS_26664_Unigene_42783|CDS_28423_Unigene_45350|CDS_22921_Unigene_37324|CDS_21770_Unigene_35648	http://www.genome.jp/kegg-bin/show_pathway?ath01230/ath:AT5G56350%09red/ath:AT3G48560%09red/ath:AT4G34200%09red/ath:AT1G74040%09red/ath:AT5G61580%09red/ath:AT5G56760%09red/ath:AT1G56190%09red/ath:AT3G60750%09red/ath:AT5G44520%09red/ath:AT4G38970%09red
Glycine, serine and threonine metabolism	KEGG PATHWAY	ath00260	4	72	0.112846	0.346061	CDS_7005_Unigene_13423|CDS_25788_Unigene_41519|CDS_22869_Unigene_37260|CDS_977_Unigene_2086	http://www.genome.jp/kegg-bin/show_pathway?ath00260/ath:AT2G42490%09red/ath:AT3G08860%09red/ath:AT1G12550%09red/ath:AT4G34200%09red
Valine, leucine and isoleucine biosynthesis	KEGG PATHWAY	ath00290	2	23	0.122108	0.351538	CDS_19095_Unigene_31613|CDS_22921_Unigene_37324	http://www.genome.jp/kegg-bin/show_pathway?ath00290/ath:AT1G74040%09red/ath:AT3G48560%09red
Valine, leucine and isoleucine degradation	KEGG PATHWAY	ath00280	3	48	0.126095	0.351538	CDS_19724_Unigene_32504|CDS_7005_Unigene_13423|CDS_23369_Unigene_38009	http://www.genome.jp/kegg-bin/show_pathway?ath00280/ath:AT3G08860%09red/ath:AT2G26800%09red/ath:AT4G36250%09red
Alanine, aspartate and glutamate metabolism	KEGG PATHWAY	ath00250	3	48	0.126095	0.351538	CDS_19477_Unigene_32158|CDS_7005_Unigene_13423|CDS_8451_Unigene_15652	http://www.genome.jp/kegg-bin/show_pathway?ath00250/ath:AT4G18440%09red/ath:AT3G08860%09red/ath:AT3G47340%09red
Glycosphingolipid biosynthesis - ganglio series	KEGG PATHWAY	ath00604	1	5	0.136869	0.37035	CDS_20910_Unigene_34380	http://www.genome.jp/kegg-bin/show_pathway?ath00604/ath:AT3G55260%09red
Ubiquitin mediated proteolysis	KEGG PATHWAY	ath04120	6	142	0.151068	0.386355	CDS_3725_Unigene_7289|CDS_905_Unigene_1987|CDS_12967_Unigene_22774|CDS_1319_Unigene_3034|CDS_14947_Unigene_25732|CDS_23233_Unigene_37776	http://www.genome.jp/kegg-bin/show_pathway?ath04120/ath:AT1G21410%09red/ath:AT3G16090%09red/ath:AT1G04510%09red/ath:AT5G41580%09red/ath:AT2G32950%09red/ath:AT3G53090%09red
Arginine and proline metabolism	KEGG PATHWAY	ath00330	3	53	0.154136	0.386355	CDS_19724_Unigene_32504|CDS_895_Unigene_1975|CDS_17956_Unigene_30090	http://www.genome.jp/kegg-bin/show_pathway?ath00330/ath:AT3G25570%09red/ath:AT3G30775%09red/ath:AT4G36250%09red
Ether lipid metabolism	KEGG PATHWAY	ath00565	2	27	0.155382	0.386355	CDS_24084_Unigene_39030|CDS_13826_Unigene_24052	http://www.genome.jp/kegg-bin/show_pathway?ath00565/ath:AT4G35790%09red/ath:AT1G63050%09red
Regulation of autophagy	KEGG PATHWAY	ath04140	2	28	0.163951	0.396934	CDS_25423_Unigene_41020|CDS_31810_Unigene_50226	http://www.genome.jp/kegg-bin/show_pathway?ath04140/ath:AT3G01090%09red/ath:AT4G29380%09red
Glycerophospholipid metabolism	KEGG PATHWAY	ath00564	4	86	0.17463	0.40986	CDS_24084_Unigene_39030|CDS_13592_Unigene_23702|CDS_13826_Unigene_24052|CDS_33975_Unigene_54413	http://www.genome.jp/kegg-bin/show_pathway?ath00564/ath:AT4G35790%09red/ath:AT1G63050%09red/ath:AT3G05510%09red/ath:AT2G39290%09red
Glycosaminoglycan degradation	KEGG PATHWAY	ath00531	1	7	0.1782	0.40986	CDS_20910_Unigene_34380	http://www.genome.jp/kegg-bin/show_pathway?ath00531/ath:AT3G55260%09red
Non-homologous end-joining	KEGG PATHWAY	ath03450	1	8	0.198119	0.444559	CDS_8678_Unigene_16006	http://www.genome.jp/kegg-bin/show_pathway?ath03450/ath:AT5G26680%09red
Purine metabolism	KEGG PATHWAY	ath00230	6	158	0.208342	0.451466	CDS_24621_Unigene_39853|CDS_5998_Unigene_11822|CDS_34257_Unigene_55070|CDS_8451_Unigene_15652|CDS_6905_Unigene_13275|CDS_26664_Unigene_42783	http://www.genome.jp/kegg-bin/show_pathway?ath00230/ath:AT4G14930%09red/ath:AT5G67100%09red/ath:AT5G56350%09red/ath:AT5G35170%09red/ath:AT4G18440%09red/ath:AT3G57660%09red
Citrate cycle (TCA cycle)	KEGG PATHWAY	ath00020	3	63	0.215019	0.451466	CDS_15371_Unigene_26397|CDS_24284_Unigene_39342|CDS_24286_Unigene_39344	http://www.genome.jp/kegg-bin/show_pathway?ath00020/ath:AT1G53240%09red/ath:AT3G15020%09red/ath:AT5G50850%09red
Glycosphingolipid biosynthesis - globo series	KEGG PATHWAY	ath00603	1	9	0.217555	0.451466	CDS_20910_Unigene_34380	http://www.genome.jp/kegg-bin/show_pathway?ath00603/ath:AT3G55260%09red
Fructose and mannose metabolism	KEGG PATHWAY	ath00051	3	64	0.221374	0.451466	CDS_28423_Unigene_45350|CDS_17997_Unigene_30145|CDS_15315_Unigene_26309	http://www.genome.jp/kegg-bin/show_pathway?ath00051/ath:AT5G61580%09red/ath:AT4G38970%09red/ath:AT3G54050%09red
Steroid biosynthesis	KEGG PATHWAY	ath00100	2	35	0.225733	0.451466	CDS_14148_Unigene_24505|CDS_26519_Unigene_42597	http://www.genome.jp/kegg-bin/show_pathway?ath00100/ath:AT1G58440%09red/ath:AT4G22756%09red
alpha-Linolenic acid metabolism	KEGG PATHWAY	ath00592	2	36	0.234721	0.453332	CDS_17483_Unigene_29333|CDS_28882_Unigene_46021	http://www.genome.jp/kegg-bin/show_pathway?ath00592/ath:AT1G72520%09red/ath:AT1G67560%09red
C5-Branched dibasic acid metabolism	KEGG PATHWAY	ath00660	1	10	0.236521	0.453332	CDS_22921_Unigene_37324	http://www.genome.jp/kegg-bin/show_pathway?ath00660/ath:AT3G48560%09red
Plant-pathogen interaction	KEGG PATHWAY	ath04626	6	167	0.243482	0.45715	CDS_10911_Unigene_19569|CDS_34551_Unigene_55482|CDS_12757_Unigene_22451|CDS_14206_Unigene_24607|CDS_7207_Unigene_13713|CDS_10284_Unigene_18544	http://www.genome.jp/kegg-bin/show_pathway?ath04626/ath:AT3G48090%09red/ath:AT5G53130%09red/ath:AT5G15410%09red/ath:AT5G52640%09red/ath:AT3G17700%09red/ath:AT1G76650%09red
beta-Alanine metabolism	KEGG PATHWAY	ath00410	2	40	0.27081	0.48852	CDS_19724_Unigene_32504|CDS_22869_Unigene_37260	http://www.genome.jp/kegg-bin/show_pathway?ath00410/ath:AT2G42490%09red/ath:AT4G36250%09red
Tyrosine metabolism	KEGG PATHWAY	ath00350	2	40	0.27081	0.48852	CDS_22848_Unigene_37237|CDS_22869_Unigene_37260	http://www.genome.jp/kegg-bin/show_pathway?ath00350/ath:AT2G02380%09red/ath:AT2G42490%09red
Glyoxylate and dicarboxylate metabolism	KEGG PATHWAY	ath00630	3	74	0.286528	0.50141	CDS_24284_Unigene_39342|CDS_977_Unigene_2086|CDS_24286_Unigene_39344	http://www.genome.jp/kegg-bin/show_pathway?ath00630/ath:AT1G53240%09red/ath:AT3G15020%09red/ath:AT1G12550%09red
Phenylalanine metabolism	KEGG PATHWAY	ath00360	2	42	0.288856	0.50141	CDS_22869_Unigene_37260|CDS_865_Unigene_1944	http://www.genome.jp/kegg-bin/show_pathway?ath00360/ath:AT2G42490%09red/ath:AT4G19010%09red
Base excision repair	KEGG PATHWAY	ath03410	2	43	0.29786	0.507466	CDS_8678_Unigene_16006|CDS_29366_Unigene_46703	http://www.genome.jp/kegg-bin/show_pathway?ath03410/ath:AT5G26680%09red/ath:AT5G57970%09red
Biotin metabolism	KEGG PATHWAY	ath00780	1	14	0.307904	0.515039	CDS_13514_Unigene_23584	http://www.genome.jp/kegg-bin/show_pathway?ath00780/ath:AT5G46290%09red
Nicotinate and nicotinamide metabolism	KEGG PATHWAY	ath00760	1	16	0.341056	0.55285	CDS_6905_Unigene_13275	http://www.genome.jp/kegg-bin/show_pathway?ath00760/ath:AT4G14930%09red
Porphyrin and chlorophyll metabolism	KEGG PATHWAY	ath00860	2	48	0.342527	0.55285	CDS_32377_Unigene_50968|CDS_33191_Unigene_52736	http://www.genome.jp/kegg-bin/show_pathway?ath00860/ath:AT1G44446%09red/ath:AT2G44520%09red
DNA replication	KEGG PATHWAY	ath03030	2	50	0.360153	0.571277	CDS_8678_Unigene_16006|CDS_5998_Unigene_11822	http://www.genome.jp/kegg-bin/show_pathway?ath03030/ath:AT5G67100%09red/ath:AT5G26680%09red
Histidine metabolism	KEGG PATHWAY	ath00340	1	18	0.372622	0.581037	CDS_19724_Unigene_32504	http://www.genome.jp/kegg-bin/show_pathway?ath00340/ath:AT4G36250%09red
Oxidative phosphorylation	KEGG PATHWAY	ath00190	5	162	0.38037	0.583234	CDS_32377_Unigene_50968|CDS_31283_Unigene_49457|CDS_9779_Unigene_17722|CDS_29005_Unigene_46192|CDS_24851_Unigene_40206	http://www.genome.jp/kegg-bin/show_pathway?ath00190/ath:AT3G42050%09red/ath:AT1G15690%09red/ath:AT2G44520%09red/ath:AT5G08690%09red/ath:AT4G30190%09red
Folate biosynthesis	KEGG PATHWAY	ath00790	1	22	0.431296	0.62997	CDS_7313_Unigene_13851	http://www.genome.jp/kegg-bin/show_pathway?ath00790/ath:AT5G41480%09red
Diterpenoid biosynthesis	KEGG PATHWAY	ath00904	1	22	0.431296	0.62997	CDS_34255_Unigene_55067	http://www.genome.jp/kegg-bin/show_pathway?ath00904/ath:AT3G25180%09red
Sesquiterpenoid and triterpenoid biosynthesis	KEGG PATHWAY	ath00909	1	23	0.445087	0.62997	CDS_26519_Unigene_42597	http://www.genome.jp/kegg-bin/show_pathway?ath00909/ath:AT1G58440%09red
Isoquinoline alkaloid biosynthesis	KEGG PATHWAY	ath00950	1	23	0.445087	0.62997	CDS_22869_Unigene_37260	http://www.genome.jp/kegg-bin/show_pathway?ath00950/ath:AT2G42490%09red
Zeatin biosynthesis	KEGG PATHWAY	ath00908	1	23	0.445087	0.62997	CDS_19208_Unigene_31785	http://www.genome.jp/kegg-bin/show_pathway?ath00908/ath:AT2G41510%09red
Ribosome biogenesis in eukaryotes	KEGG PATHWAY	ath03008	3	100	0.456886	0.636871	CDS_31572_Unigene_49878|CDS_17068_Unigene_28804|CDS_25977_Unigene_41816	http://www.genome.jp/kegg-bin/show_pathway?ath03008/ath:AT5G11240%09red/ath:AT3G55620%09red/ath:AT1G75660%09red
Pantothenate and CoA biosynthesis	KEGG PATHWAY	ath00770	1	28	0.509193	0.694798	CDS_22921_Unigene_37324	http://www.genome.jp/kegg-bin/show_pathway?ath00770/ath:AT3G48560%09red
Nucleotide excision repair	KEGG PATHWAY	ath03420	2	69	0.516055	0.694798	CDS_13407_Unigene_23414|CDS_34396_Unigene_55236	http://www.genome.jp/kegg-bin/show_pathway?ath03420/ath:AT3G28030%09red/ath:AT5G16630%09red
Biosynthesis of unsaturated fatty acids	KEGG PATHWAY	ath01040	1	29	0.521098	0.694798	CDS_17933_Unigene_30047	http://www.genome.jp/kegg-bin/show_pathway?ath01040/ath:AT1G01710%09red
Aminoacyl-tRNA biosynthesis	KEGG PATHWAY	ath00970	3	115	0.547432	0.706805	CDS_24109_Unigene_39071|CDS_21874_Unigene_35769|CDS_17582_Unigene_29497	http://www.genome.jp/kegg-bin/show_pathway?ath00970/ath:AT1G11870%09red/ath:AT4G17300%09red/ath:AT1G29880%09red
2-Oxocarboxylic acid metabolism	KEGG PATHWAY	ath01210	2	74	0.55275	0.706805	CDS_19095_Unigene_31613|CDS_22921_Unigene_37324	http://www.genome.jp/kegg-bin/show_pathway?ath01210/ath:AT1G74040%09red/ath:AT3G48560%09red
Pyrimidine metabolism	KEGG PATHWAY	ath00240	3	116	0.553151	0.706805	CDS_6905_Unigene_13275|CDS_24621_Unigene_39853|CDS_5998_Unigene_11822	http://www.genome.jp/kegg-bin/show_pathway?ath00240/ath:AT5G67100%09red/ath:AT4G14930%09red/ath:AT3G57660%09red
Ubiquinone and other terpenoid-quinone biosynthesis	KEGG PATHWAY	ath00130	1	35	0.586711	0.734175	CDS_865_Unigene_1944	http://www.genome.jp/kegg-bin/show_pathway?ath00130/ath:AT4G19010%09red
Tropane, piperidine and pyridine alkaloid biosynthesis	KEGG PATHWAY	ath00960	1	36	0.596738	0.734175	CDS_22869_Unigene_37260	http://www.genome.jp/kegg-bin/show_pathway?ath00960/ath:AT2G42490%09red
Pentose and glucuronate interconversions	KEGG PATHWAY	ath00040	2	81	0.60074	0.734175	CDS_19724_Unigene_32504|CDS_26281_Unigene_42238	http://www.genome.jp/kegg-bin/show_pathway?ath00040/ath:AT5G52560%09red/ath:AT4G36250%09red
RNA transport	KEGG PATHWAY	ath03013	4	169	0.606492	0.734175	CDS_23748_Unigene_38484|CDS_32196_Unigene_50766|CDS_31956_Unigene_50422|CDS_7454_Unigene_14068	http://www.genome.jp/kegg-bin/show_pathway?ath03013/ath:AT5G51200%09red/ath:AT1G07940%09red/ath:AT1G14850%09red/ath:AT4G27130%09red
Phagosome	KEGG PATHWAY	ath04145	2	86	0.632577	0.749212	CDS_26064_Unigene_41927|CDS_24851_Unigene_40206	http://www.genome.jp/kegg-bin/show_pathway?ath04145/ath:AT3G42050%09red/ath:AT1G20010%09red
Fatty acid biosynthesis	KEGG PATHWAY	ath00061	1	41	0.643345	0.749212	CDS_13514_Unigene_23584	http://www.genome.jp/kegg-bin/show_pathway?ath00061/ath:AT5G46290%09red
Fatty acid degradation	KEGG PATHWAY	ath00071	1	41	0.643345	0.749212	CDS_19724_Unigene_32504	http://www.genome.jp/kegg-bin/show_pathway?ath00071/ath:AT4G36250%09red
Amino sugar and nucleotide sugar metabolism	KEGG PATHWAY	ath00520	3	135	0.653204	0.751184	CDS_26281_Unigene_42238|CDS_8558_Unigene_15811|CDS_20910_Unigene_34380	http://www.genome.jp/kegg-bin/show_pathway?ath00520/ath:AT5G52560%09red/ath:AT1G12780%09red/ath:AT3G55260%09red
RNA polymerase	KEGG PATHWAY	ath03020	1	45	0.676727	0.768057	CDS_24621_Unigene_39853	http://www.genome.jp/kegg-bin/show_pathway?ath03020/ath:AT3G57660%09red
Tryptophan metabolism	KEGG PATHWAY	ath00380	1	46	0.684573	0.768057	CDS_19724_Unigene_32504	http://www.genome.jp/kegg-bin/show_pathway?ath00380/ath:AT4G36250%09red
Protein export	KEGG PATHWAY	ath03060	1	53	0.73442	0.814056	CDS_15043_Unigene_25879	http://www.genome.jp/kegg-bin/show_pathway?ath03060/ath:AT2G01110%09red
Basal transcription factors	KEGG PATHWAY	ath03022	1	55	0.747159	0.818317	CDS_17343_Unigene_29157	http://www.genome.jp/kegg-bin/show_pathway?ath03022/ath:AT1G73960%09red
Terpenoid backbone biosynthesis	KEGG PATHWAY	ath00900	1	58	0.765133	0.818514	CDS_19836_Unigene_32688	http://www.genome.jp/kegg-bin/show_pathway?ath00900/ath:AT3G54250%09red
Proteasome	KEGG PATHWAY	ath03050	1	58	0.765133	0.818514	CDS_34281_Unigene_55096	http://www.genome.jp/kegg-bin/show_pathway?ath03050/ath:AT2G20580%09red
mRNA surveillance pathway	KEGG PATHWAY	ath03015	2	114	0.77512	0.819667	CDS_21622_Unigene_35420|CDS_2060_Unigene_4433	http://www.genome.jp/kegg-bin/show_pathway?ath03015/ath:AT2G42500%09red/ath:AT5G55670%09red
Fatty acid metabolism	KEGG PATHWAY	ath01212	1	67	0.811753	0.84865	CDS_13514_Unigene_23584	http://www.genome.jp/kegg-bin/show_pathway?ath01212/ath:AT5G46290%09red
Starch and sucrose metabolism	KEGG PATHWAY	ath00500	3	202	0.876593	0.904564	CDS_11325_Unigene_20297|CDS_15643_Unigene_26754|CDS_22833_Unigene_37208	http://www.genome.jp/kegg-bin/show_pathway?ath00500/ath:AT2G01630%09red/ath:AT3G01180%09red/ath:AT3G45940%09red
Peroxisome	KEGG PATHWAY	ath04146	1	87	0.8849	0.904564	CDS_23369_Unigene_38009	http://www.genome.jp/kegg-bin/show_pathway?ath04146/ath:AT2G26800%09red
Glutathione metabolism	KEGG PATHWAY	ath00480	1	93	0.9007	0.910598	CDS_1743_Unigene_3727	http://www.genome.jp/kegg-bin/show_pathway?ath00480/ath:AT5G13110%09red
Ribosome	KEGG PATHWAY	ath03010	1	363	0.999875	0.999875	CDS_12382_Unigene_21943	http://www.genome.jp/kegg-bin/show_pathway?ath03010/ath:AT3G18760%09red
#Term	Database	ID	Input number	Background number	P-Value	Corrected P-Value	Input	Hyperlink
#Term	Database	ID	Input number	Background number	P-Value	Corrected P-Value	Input	Hyperlink
--------------------
--------------------
--------------------

## Sheet: FLOOD Down-regulated
#Term	Database	ID	Input number	Background number	P-Value	Corrected P-Value	Input	Hyperlink
Fructose and mannose metabolism	KEGG PATHWAY	ath00051	6	64	0.00144473	0.116535	CDS_1026_Unigene_2186|CDS_4926_Unigene_9593|CDS_4300_Unigene_8378|CDS_18277_Unigene_30479|CDS_5355_Unigene_10491|CDS_4993_Unigene_9688	http://www.genome.jp/kegg-bin/show_pathway?ath00051/ath:AT3G54050%09red/ath:AT1G06030%09red/ath:AT1G07110%09red/ath:AT2G01140%09red/ath:AT5G56630%09red/ath:AT2G22480%09red
Carbon metabolism	KEGG PATHWAY	ath01200	12	262	0.00354242	0.116535	CDS_13036_Unigene_22862|CDS_8144_Unigene_15201|CDS_4926_Unigene_9593|CDS_4756_Unigene_9240|CDS_15906_Unigene_27141|CDS_25556_Unigene_41182|CDS_19110_Unigene_31640|CDS_13847_Unigene_24079|CDS_4300_Unigene_8378|CDS_18277_Unigene_30479|CDS_5355_Unigene_10491|CDS_1283_Unigene_2962	http://www.genome.jp/kegg-bin/show_pathway?ath01200/ath:AT3G54050%09red/ath:AT1G13700%09red/ath:AT2G36530%09red/ath:AT5G16390%09red/ath:AT2G22480%09red/ath:AT1G79750%09red/ath:AT1G12550%09red/ath:AT2G01140%09red/ath:AT2G26080%09red/ath:AT5G50850%09red/ath:AT5G56630%09red/ath:AT1G36370%09red
Pentose phosphate pathway	KEGG PATHWAY	ath00030	5	58	0.00498871	0.116535	CDS_19110_Unigene_31640|CDS_4300_Unigene_8378|CDS_18277_Unigene_30479|CDS_4926_Unigene_9593|CDS_5355_Unigene_10491	http://www.genome.jp/kegg-bin/show_pathway?ath00030/ath:AT2G22480%09red/ath:AT2G01140%09red/ath:AT5G56630%09red/ath:AT1G13700%09red/ath:AT3G54050%09red
Glycolysis / Gluconeogenesis	KEGG PATHWAY	ath00010	7	117	0.00639346	0.116535	CDS_4926_Unigene_9593|CDS_25556_Unigene_41182|CDS_13398_Unigene_23401|CDS_13847_Unigene_24079|CDS_4300_Unigene_8378|CDS_18277_Unigene_30479|CDS_5355_Unigene_10491	http://www.genome.jp/kegg-bin/show_pathway?ath00010/ath:AT3G54050%09red/ath:AT2G36530%09red/ath:AT5G50850%09red/ath:AT2G01140%09red/ath:AT5G56630%09red/ath:AT2G22480%09red/ath:AT3G48000%09red
Biosynthesis of secondary metabolites	KEGG PATHWAY	ath01110	31	1076	0.00764929	0.116535	CDS_4756_Unigene_9240|CDS_19619_Unigene_32371|CDS_19110_Unigene_31640|CDS_18277_Unigene_30479|CDS_5355_Unigene_10491|CDS_13036_Unigene_22862|CDS_5287_Unigene_10323|CDS_6803_Unigene_13090|CDS_7235_Unigene_13751|CDS_28589_Unigene_45583|CDS_15906_Unigene_27141|CDS_11942_Unigene_21265|CDS_13398_Unigene_23401|CDS_4300_Unigene_8378|CDS_1283_Unigene_2962|CDS_12823_Unigene_22547|CDS_4926_Unigene_9593|CDS…	http://www.genome.jp/kegg-bin/show_pathway?ath01110/ath:AT3G30180%09red/ath:AT2G26930%09red/ath:AT5G16390%09red/ath:AT5G50850%09red/ath:AT3G15730%09red/ath:AT1G12550%09red/ath:AT2G01140%09red/ath:AT2G07050%09red/ath:AT2G22480%09red/ath:AT1G13700%09red/ath:AT2G36530%09red/ath:AT5G49460%09red/ath:AT3G48360%09red/ath:AT1G60550%09red/ath:AT5G45930%09red/ath:AT1G36370%09red/ath:AT2G40890%09red/ath:AT5…
Metabolic pathways	KEGG PATHWAY	ath01100	49	1910	0.00813038	0.116535	CDS_8144_Unigene_15201|CDS_12346_Unigene_21879|CDS_4756_Unigene_9240|CDS_19619_Unigene_32371|CDS_20354_Unigene_33524|CDS_19110_Unigene_31640|CDS_18277_Unigene_30479|CDS_5355_Unigene_10491|CDS_3309_Unigene_6635|CDS_21204_Unigene_34831|CDS_14279_Unigene_24727|CDS_24895_Unigene_40254|CDS_13036_Unigene_22862|CDS_5287_Unigene_10323|CDS_6803_Unigene_13090|CDS_7235_Unigene_13751|CDS_28589_Unigene_45583|…	http://www.genome.jp/kegg-bin/show_pathway?ath01100/ath:AT1G32210%09red/ath:AT2G26930%09red/ath:AT5G53850%09red/ath:AT5G50850%09red/ath:AT3G15730%09red/ath:AT1G12550%09red/ath:AT1G08510%09red/ath:AT2G01140%09red/ath:AT2G40890%09red/ath:AT2G05990%09red/ath:AT2G07050%09red/ath:AT3G23820%09red/ath:AT2G29630%09red/ath:AT1G13700%09red/ath:AT2G36530%09red/ath:AT4G15950%09red/ath:AT2G22480%09red/ath:AT5…
RNA degradation	KEGG PATHWAY	ath03018	6	112	0.0180568	0.166483	CDS_12864_Unigene_22612|CDS_29937_Unigene_47588|CDS_13847_Unigene_24079|CDS_4300_Unigene_8378|CDS_5355_Unigene_10491|CDS_12060_Unigene_21446	http://www.genome.jp/kegg-bin/show_pathway?ath03018/ath:AT2G36530%09red/ath:AT1G76630%09red/ath:AT5G60170%09red/ath:AT5G56630%09red/ath:AT2G22480%09red/ath:AT3G45630%09red
Galactose metabolism	KEGG PATHWAY	ath00052	4	55	0.0200223	0.166483	CDS_9024_Unigene_16605|CDS_4300_Unigene_8378|CDS_5355_Unigene_10491|CDS_26566_Unigene_42663	http://www.genome.jp/kegg-bin/show_pathway?ath00052/ath:AT5G56630%09red/ath:AT1G62660%09red/ath:AT2G22480%09red/ath:AT3G57520%09red
Thiamine metabolism	KEGG PATHWAY	ath00730	2	11	0.021127	0.166483	CDS_3309_Unigene_6635|CDS_23491_Unigene_38164	http://www.genome.jp/kegg-bin/show_pathway?ath00730/ath:AT2G29630%09red/ath:AT1G22940%09red
Homologous recombination	KEGG PATHWAY	ath03440	4	56	0.0211635	0.166483	CDS_22262_Unigene_36325|CDS_2801_Unigene_5619|CDS_19424_Unigene_32082|CDS_24751_Unigene_40038	http://www.genome.jp/kegg-bin/show_pathway?ath03440/ath:AT1G10930%09red/ath:AT2G32000%09red/ath:AT5G20850%09red/ath:AT5G08020%09red
Pyruvate metabolism	KEGG PATHWAY	ath00620	5	85	0.0212944	0.166483	CDS_4756_Unigene_9240|CDS_13398_Unigene_23401|CDS_26559_Unigene_42651|CDS_25556_Unigene_41182|CDS_8144_Unigene_15201	http://www.genome.jp/kegg-bin/show_pathway?ath00620/ath:AT5G16390%09red/ath:AT5G50850%09red/ath:AT1G79750%09red/ath:AT3G48000%09red/ath:AT1G67280%09red
Circadian rhythm - plant	KEGG PATHWAY	ath04712	3	36	0.0308534	0.221116	CDS_31650_Unigene_49990|CDS_11374_Unigene_20405|CDS_4110_Unigene_7892	http://www.genome.jp/kegg-bin/show_pathway?ath04712/ath:AT5G60100%09red/ath:AT5G24470%09red/ath:AT5G02810%09red
Fatty acid metabolism	KEGG PATHWAY	ath01212	4	67	0.0363481	0.237162	CDS_4756_Unigene_9240|CDS_27792_Unigene_44450|CDS_15755_Unigene_26920|CDS_24895_Unigene_40254	http://www.genome.jp/kegg-bin/show_pathway?ath01212/ath:AT5G16390%09red/ath:AT1G08510%09red/ath:AT5G47330%09red/ath:AT2G05990%09red
Amino sugar and nucleotide sugar metabolism	KEGG PATHWAY	ath00520	6	135	0.0386078	0.237162	CDS_23259_Unigene_37818|CDS_1801_Unigene_3853|CDS_4993_Unigene_9688|CDS_28199_Unigene_45056|CDS_1686_Unigene_3648|CDS_3530_Unigene_6987	http://www.genome.jp/kegg-bin/show_pathway?ath00520/ath:AT5G17770%09red/ath:AT1G06030%09red/ath:AT3G25140%09red/ath:AT1G63000%09red/ath:AT3G23820%09red/ath:AT5G24090%09red
Fatty acid biosynthesis	KEGG PATHWAY	ath00061	3	41	0.041956	0.240548	CDS_4756_Unigene_9240|CDS_27792_Unigene_44450|CDS_24895_Unigene_40254	http://www.genome.jp/kegg-bin/show_pathway?ath00061/ath:AT5G16390%09red/ath:AT1G08510%09red/ath:AT2G05990%09red
Phagosome	KEGG PATHWAY	ath04145	4	86	0.074162	0.366573	CDS_31131_Unigene_49238|CDS_1802_Unigene_3855|CDS_2944_Unigene_5872|CDS_27195_Unigene_43549	http://www.genome.jp/kegg-bin/show_pathway?ath04145/ath:AT4G35020%09red/ath:AT5G23860%09red/ath:AT3G14270%09red
Glycerolipid metabolism	KEGG PATHWAY	ath00561	3	53	0.0754796	0.366573	CDS_13398_Unigene_23401|CDS_12346_Unigene_21879|CDS_11942_Unigene_21265	http://www.genome.jp/kegg-bin/show_pathway?ath00561/ath:AT1G01610%09red/ath:AT3G48000%09red/ath:AT1G73480%09red
Starch and sucrose metabolism	KEGG PATHWAY	ath00500	7	202	0.0767247	0.366573	CDS_1686_Unigene_3648|CDS_31757_Unigene_50169|CDS_1801_Unigene_3853|CDS_8801_Unigene_16226|CDS_26566_Unigene_42663|CDS_4993_Unigene_9688|CDS_269_Unigene_584	http://www.genome.jp/kegg-bin/show_pathway?ath00500/ath:AT1G62660%09red/ath:AT3G23820%09red/ath:AT3G25140%09red/ath:AT1G66250%09red/ath:AT3G29320%09red/ath:AT5G20950%09red/ath:AT1G06030%09red
ABC transporters	KEGG PATHWAY	ath02010	2	26	0.0862706	0.390488	CDS_10950_Unigene_19646|CDS_8211_Unigene_15302	http://www.genome.jp/kegg-bin/show_pathway?ath02010/ath:AT5G58270%09red/ath:AT2G41700%09red
Ether lipid metabolism	KEGG PATHWAY	ath00565	2	27	0.0916222	0.393976	CDS_15014_Unigene_25833|CDS_6803_Unigene_13090	http://www.genome.jp/kegg-bin/show_pathway?ath00565/ath:AT3G15730%09red
Endocytosis	KEGG PATHWAY	ath04144	5	142	0.117732	0.437214	CDS_15014_Unigene_25833|CDS_6803_Unigene_13090|CDS_5835_Unigene_11522|CDS_2852_Unigene_5720|CDS_31092_Unigene_49199	http://www.genome.jp/kegg-bin/show_pathway?ath04144/ath:AT5G19610%09red/ath:AT4G38200%09red/ath:AT3G11130%09red/ath:AT3G15730%09red
Phosphatidylinositol signaling system	KEGG PATHWAY	ath04070	3	68	0.129146	0.437214	CDS_31131_Unigene_49238|CDS_2944_Unigene_5872|CDS_32071_Unigene_50596	http://www.genome.jp/kegg-bin/show_pathway?ath04070/ath:AT1G49340%09red/ath:AT3G14270%09red
Inositol phosphate metabolism	KEGG PATHWAY	ath00562	3	68	0.129146	0.437214	CDS_31131_Unigene_49238|CDS_2944_Unigene_5872|CDS_32071_Unigene_50596	http://www.genome.jp/kegg-bin/show_pathway?ath00562/ath:AT1G49340%09red/ath:AT3G14270%09red
Monoterpenoid biosynthesis	KEGG PATHWAY	ath00902	1	7	0.132186	0.437214	CDS_10064_Unigene_18171	http://www.genome.jp/kegg-bin/show_pathway?ath00902/ath:AT1G61680%09red
Carbon fixation in photosynthetic organisms	KEGG PATHWAY	ath00710	3	69	0.133111	0.437214	CDS_8144_Unigene_15201|CDS_18277_Unigene_30479|CDS_4926_Unigene_9593	http://www.genome.jp/kegg-bin/show_pathway?ath00710/ath:AT2G01140%09red/ath:AT1G79750%09red/ath:AT3G54050%09red
Ubiquinone and other terpenoid-quinone biosynthesis	KEGG PATHWAY	ath00130	2	35	0.137425	0.437214	CDS_5287_Unigene_10323|CDS_5884_Unigene_11633	http://www.genome.jp/kegg-bin/show_pathway?ath00130/ath:AT4G32770%09red/ath:AT1G60550%09red
Fatty acid elongation	KEGG PATHWAY	ath00062	2	35	0.137425	0.437214	CDS_27866_Unigene_44560|CDS_15755_Unigene_26920	http://www.genome.jp/kegg-bin/show_pathway?ath00062/ath:AT5G47330%09red/ath:AT5G04530%09red
Glycine, serine and threonine metabolism	KEGG PATHWAY	ath00260	3	72	0.14525	0.437214	CDS_13036_Unigene_22862|CDS_15906_Unigene_27141|CDS_1283_Unigene_2962	http://www.genome.jp/kegg-bin/show_pathway?ath00260/ath:AT1G36370%09red/ath:AT2G26080%09red/ath:AT1G12550%09red
Brassinosteroid biosynthesis	KEGG PATHWAY	ath00905	1	8	0.147433	0.437214	CDS_605_Unigene_1404	http://www.genome.jp/kegg-bin/show_pathway?ath00905/ath:AT3G30180%09red
Glyoxylate and dicarboxylate metabolism	KEGG PATHWAY	ath00630	3	74	0.153537	0.440138	CDS_13036_Unigene_22862|CDS_15906_Unigene_27141|CDS_1283_Unigene_2962	http://www.genome.jp/kegg-bin/show_pathway?ath00630/ath:AT1G36370%09red/ath:AT2G26080%09red/ath:AT1G12550%09red
Riboflavin metabolism	KEGG PATHWAY	ath00740	1	9	0.162412	0.446759	CDS_29755_Unigene_47277	http://www.genome.jp/kegg-bin/show_pathway?ath00740/ath:AT4G21470%09red
Photosynthesis	KEGG PATHWAY	ath00195	3	77	0.166236	0.446759	CDS_21204_Unigene_34831|CDS_21207_Unigene_34833|CDS_7241_Unigene_13760	http://www.genome.jp/kegg-bin/show_pathway?ath00195/ath:AT2G27510%09red/ath:AT5G66190%09red
Ascorbate and aldarate metabolism	KEGG PATHWAY	ath00053	2	41	0.174362	0.454399	CDS_13398_Unigene_23401|CDS_2466_Unigene_5133	http://www.genome.jp/kegg-bin/show_pathway?ath00053/ath:AT3G27820%09red/ath:AT3G48000%09red
Plant-pathogen interaction	KEGG PATHWAY	ath04626	5	167	0.186275	0.466647	CDS_5081_Unigene_9844|CDS_5758_Unigene_11363|CDS_8759_Unigene_16143|CDS_4329_Unigene_8455|CDS_25668_Unigene_41308	http://www.genome.jp/kegg-bin/show_pathway?ath04626/ath:AT1G19230%09red/ath:AT5G46330%09red/ath:AT4G23650%09red/ath:AT4G21940%09red/ath:AT5G20480%09red
Limonene and pinene degradation	KEGG PATHWAY	ath00903	2	44	0.193375	0.466647	CDS_13398_Unigene_23401|CDS_7235_Unigene_13751	http://www.genome.jp/kegg-bin/show_pathway?ath00903/ath:AT3G48360%09red/ath:AT3G48000%09red
Glycerophospholipid metabolism	KEGG PATHWAY	ath00564	3	86	0.205984	0.466647	CDS_15014_Unigene_25833|CDS_6803_Unigene_13090|CDS_11942_Unigene_21265	http://www.genome.jp/kegg-bin/show_pathway?ath00564/ath:AT3G15730%09red/ath:AT1G01610%09red
Stilbenoid, diarylheptanoid and gingerol biosynthesis	KEGG PATHWAY	ath00945	2	46	0.206193	0.466647	CDS_7235_Unigene_13751|CDS_24208_Unigene_39206	http://www.genome.jp/kegg-bin/show_pathway?ath00945/ath:AT3G48360%09red/ath:AT2G40890%09red
Tryptophan metabolism	KEGG PATHWAY	ath00380	2	46	0.206193	0.466647	CDS_13398_Unigene_23401|CDS_8862_Unigene_16319	http://www.genome.jp/kegg-bin/show_pathway?ath00380/ath:AT1G24100%09red/ath:AT3G48000%09red
Biotin metabolism	KEGG PATHWAY	ath00780	1	14	0.233459	0.512188	CDS_27792_Unigene_44450	http://www.genome.jp/kegg-bin/show_pathway?ath00780/ath:AT2G05990%09red
Glutathione metabolism	KEGG PATHWAY	ath00480	3	93	0.238227	0.512188	CDS_14008_Unigene_24287|CDS_16721_Unigene_28287|CDS_19608_Unigene_32351	http://www.genome.jp/kegg-bin/show_pathway?ath00480/ath:AT5G02780%09red/ath:AT3G27060%09red/ath:AT2G48150%09red
Arachidonic acid metabolism	KEGG PATHWAY	ath00590	1	17	0.273167	0.555148	CDS_19608_Unigene_32351	http://www.genome.jp/kegg-bin/show_pathway?ath00590/ath:AT2G48150%09red
Histidine metabolism	KEGG PATHWAY	ath00340	1	18	0.285941	0.555148	CDS_13398_Unigene_23401	http://www.genome.jp/kegg-bin/show_pathway?ath00340/ath:AT3G48000%09red
Cyanoamino acid metabolism	KEGG PATHWAY	ath00460	2	60	0.297239	0.555148	CDS_1283_Unigene_2962|CDS_31757_Unigene_50169	http://www.genome.jp/kegg-bin/show_pathway?ath00460/ath:AT5G20950%09red/ath:AT1G36370%09red
Glucosinolate biosynthesis	KEGG PATHWAY	ath00966	1	19	0.298491	0.555148	CDS_8862_Unigene_16319	http://www.genome.jp/kegg-bin/show_pathway?ath00966/ath:AT1G24100%09red
AGE-RAGE signaling pathway in diabetic complications	KEGG PATHWAY	ath04933	1	20	0.310821	0.555148	CDS_27195_Unigene_43549	http://www.genome.jp/kegg-bin/show_pathway?ath04933/ath:AT4G35020%09red
One carbon pool by folate	KEGG PATHWAY	ath00670	1	20	0.310821	0.555148	CDS_1283_Unigene_2962	http://www.genome.jp/kegg-bin/show_pathway?ath00670/ath:AT1G36370%09red
Citrate cycle (TCA cycle)	KEGG PATHWAY	ath00020	2	63	0.316695	0.555148	CDS_14010_Unigene_24289|CDS_25556_Unigene_41182	http://www.genome.jp/kegg-bin/show_pathway?ath00020/ath:AT5G50850%09red/ath:AT5G49460%09red
Flavonoid biosynthesis	KEGG PATHWAY	ath00941	1	21	0.322935	0.555148	CDS_24208_Unigene_39206	http://www.genome.jp/kegg-bin/show_pathway?ath00941/ath:AT2G40890%09red
Cysteine and methionine metabolism	KEGG PATHWAY	ath00270	3	112	0.328739	0.555148	CDS_20354_Unigene_33524|CDS_13339_Unigene_23316|CDS_3158_Unigene_6350	http://www.genome.jp/kegg-bin/show_pathway?ath00270/ath:AT5G53850%09red/ath:AT1G69770%09red/ath:AT1G49820%09red
Protein processing in endoplasmic reticulum	KEGG PATHWAY	ath04141	5	212	0.333877	0.555148	CDS_12257_Unigene_21735|CDS_3700_Unigene_7247|CDS_21917_Unigene_35827|CDS_14279_Unigene_24727|CDS_4585_Unigene_8939	http://www.genome.jp/kegg-bin/show_pathway?ath04141/ath:AT3G63460%09red/ath:AT5G38470%09red/ath:AT1G32210%09red/ath:AT3G17000%09red/ath:AT5G05470%09red
Photosynthesis - antenna proteins	KEGG PATHWAY	ath00196	1	22	0.334836	0.555148	CDS_799_Unigene_1819	http://www.genome.jp/kegg-bin/show_pathway?ath00196/ath:AT1G45474%09red
Aminoacyl-tRNA biosynthesis	KEGG PATHWAY	ath00970	3	115	0.34315	0.555148	CDS_16291_Unigene_27701|CDS_24108_Unigene_39070|CDS_16042_Unigene_27348	http://www.genome.jp/kegg-bin/show_pathway?ath00970/ath:AT5G16715%09red/ath:AT2G33840%09red/ath:AT1G29880%09red
Zeatin biosynthesis	KEGG PATHWAY	ath00908	1	23	0.346529	0.555148	CDS_1038_Unigene_2209	http://www.genome.jp/kegg-bin/show_pathway?ath00908/ath:AT1G22400%09red
Nucleotide excision repair	KEGG PATHWAY	ath03420	2	69	0.355189	0.555148	CDS_21917_Unigene_35827|CDS_24751_Unigene_40038	http://www.genome.jp/kegg-bin/show_pathway?ath03420/ath:AT5G38470%09red/ath:AT5G08020%09red
Plant hormone signal transduction	KEGG PATHWAY	ath04075	6	271	0.360052	0.555148	CDS_33985_Unigene_54430|CDS_267_Unigene_583|CDS_18768_Unigene_31161|CDS_19969_Unigene_32932|CDS_4844_Unigene_9421|CDS_4321_Unigene_8443	http://www.genome.jp/kegg-bin/show_pathway?ath04075/ath:AT3G63010%09red/ath:AT2G25490%09red/ath:AT1G19180%09red/ath:AT2G21210%09red/ath:AT1G19850%09red/ath:AT3G16500%09red
RNA transport	KEGG PATHWAY	ath03013	4	169	0.361492	0.555148	CDS_12257_Unigene_21735|CDS_10256_Unigene_18508|CDS_8878_Unigene_16341|CDS_12143_Unigene_21556	http://www.genome.jp/kegg-bin/show_pathway?ath03013/ath:AT5G05470%09red/ath:AT3G08947%09red/ath:AT1G79280%09red/ath:AT5G27640%09red
Lysine degradation	KEGG PATHWAY	ath00310	1	26	0.38039	0.573922	CDS_13398_Unigene_23401	http://www.genome.jp/kegg-bin/show_pathway?ath00310/ath:AT3G48000%09red
Cutin, suberine and wax biosynthesis	KEGG PATHWAY	ath00073	1	28	0.401986	0.596048	CDS_3349_Unigene_6696	http://www.genome.jp/kegg-bin/show_pathway?ath00073/ath:AT3G11980%09red
Pentose and glucuronate interconversions	KEGG PATHWAY	ath00040	2	81	0.429554	0.62613	CDS_13398_Unigene_23401|CDS_9404_Unigene_17129	http://www.genome.jp/kegg-bin/show_pathway?ath00040/ath:AT3G53190%09red/ath:AT3G48000%09red
Spliceosome	KEGG PATHWAY	ath03040	4	192	0.452096	0.638296	CDS_25974_Unigene_41809|CDS_167_Unigene_386|CDS_1980_Unigene_4301|CDS_25537_Unigene_41162	http://www.genome.jp/kegg-bin/show_pathway?ath03040/ath:AT5G28740%09red/ath:AT5G16780%09red/ath:AT5G04280%09red/ath:AT3G01540%09red
Propanoate metabolism	KEGG PATHWAY	ath00640	1	33	0.452745	0.638296	CDS_4756_Unigene_9240	http://www.genome.jp/kegg-bin/show_pathway?ath00640/ath:AT5G16390%09red
Steroid biosynthesis	KEGG PATHWAY	ath00100	1	35	0.471823	0.647588	CDS_11220_Unigene_20106	http://www.genome.jp/kegg-bin/show_pathway?ath00100/ath:AT2G07050%09red
alpha-Linolenic acid metabolism	KEGG PATHWAY	ath00592	1	36	0.481112	0.647588	CDS_12823_Unigene_22547	http://www.genome.jp/kegg-bin/show_pathway?ath00592/ath:AT5G42650%09red
Biosynthesis of amino acids	KEGG PATHWAY	ath01230	5	255	0.481926	0.647588	CDS_5355_Unigene_10491|CDS_13847_Unigene_24079|CDS_4300_Unigene_8378|CDS_18277_Unigene_30479|CDS_1283_Unigene_2962	http://www.genome.jp/kegg-bin/show_pathway?ath01230/ath:AT2G22480%09red/ath:AT2G01140%09red/ath:AT5G56630%09red/ath:AT1G36370%09red/ath:AT2G36530%09red
Mismatch repair	KEGG PATHWAY	ath03430	1	39	0.508012	0.672138	CDS_24751_Unigene_40038	http://www.genome.jp/kegg-bin/show_pathway?ath03430/ath:AT5G08020%09red
beta-Alanine metabolism	KEGG PATHWAY	ath00410	1	40	0.516665	0.67323	CDS_13398_Unigene_23401	http://www.genome.jp/kegg-bin/show_pathway?ath00410/ath:AT3G48000%09red
Fatty acid degradation	KEGG PATHWAY	ath00071	1	41	0.525167	0.674095	CDS_13398_Unigene_23401	http://www.genome.jp/kegg-bin/show_pathway?ath00071/ath:AT3G48000%09red
N-Glycan biosynthesis	KEGG PATHWAY	ath00510	1	44	0.549787	0.687516	CDS_14279_Unigene_24727	http://www.genome.jp/kegg-bin/show_pathway?ath00510/ath:AT1G32210%09red
RNA polymerase	KEGG PATHWAY	ath03020	1	45	0.557707	0.687516	CDS_13064_Unigene_22905	http://www.genome.jp/kegg-bin/show_pathway?ath03020/ath:AT4G15950%09red
Valine, leucine and isoleucine degradation	KEGG PATHWAY	ath00280	1	48	0.580643	0.687516	CDS_13398_Unigene_23401	http://www.genome.jp/kegg-bin/show_pathway?ath00280/ath:AT3G48000%09red
Porphyrin and chlorophyll metabolism	KEGG PATHWAY	ath00860	1	48	0.580643	0.687516	CDS_19619_Unigene_32371	http://www.genome.jp/kegg-bin/show_pathway?ath00860/ath:AT5G45930%09red
SNARE interactions in vesicular transport	KEGG PATHWAY	ath04130	1	48	0.580643	0.687516	CDS_20948_Unigene_34449	http://www.genome.jp/kegg-bin/show_pathway?ath04130/ath:AT1G16240%09red
DNA replication	KEGG PATHWAY	ath03030	1	50	0.595271	0.687516	CDS_24751_Unigene_40038	http://www.genome.jp/kegg-bin/show_pathway?ath03030/ath:AT5G08020%09red
mRNA surveillance pathway	KEGG PATHWAY	ath03015	2	114	0.607036	0.687516	CDS_11536_Unigene_20658|CDS_6646_Unigene_12792	http://www.genome.jp/kegg-bin/show_pathway?ath03015/ath:AT3G09880%09red/ath:AT5G25510%09red
Protein export	KEGG PATHWAY	ath03060	1	53	0.616263	0.687516	CDS_19187_Unigene_31756	http://www.genome.jp/kegg-bin/show_pathway?ath03060/ath:AT5G05670%09red
Arginine and proline metabolism	KEGG PATHWAY	ath00330	1	53	0.616263	0.687516	CDS_13398_Unigene_23401	http://www.genome.jp/kegg-bin/show_pathway?ath00330/ath:AT3G48000%09red
Pyrimidine metabolism	KEGG PATHWAY	ath00240	2	116	0.61634	0.687516	CDS_13064_Unigene_22905|CDS_14008_Unigene_24287	http://www.genome.jp/kegg-bin/show_pathway?ath00240/ath:AT3G27060%09red/ath:AT4G15950%09red
Basal transcription factors	KEGG PATHWAY	ath03022	1	55	0.62965	0.687516	CDS_6110_Unigene_11989	http://www.genome.jp/kegg-bin/show_pathway?ath03022/ath:AT4G20280%09red
Ribosome	KEGG PATHWAY	ath03010	6	363	0.631555	0.687516	CDS_2762_Unigene_5545|CDS_10370_Unigene_18715|CDS_26201_Unigene_42122|CDS_4355_Unigene_8494|CDS_11310_Unigene_20274|CDS_2424_Unigene_5072	http://www.genome.jp/kegg-bin/show_pathway?ath03010/ath:AT5G56710%09red/ath:AT4G18100%09red/ath:AT2G40010%09red/ath:AT1G04480%09red/ath:AT1G75350%09red/ath:AT3G04770%09red
Terpenoid backbone biosynthesis	KEGG PATHWAY	ath00900	1	58	0.648862	0.697527	CDS_28589_Unigene_45583	http://www.genome.jp/kegg-bin/show_pathway?ath00900/ath:AT2G26930%09red
Ubiquitin mediated proteolysis	KEGG PATHWAY	ath04120	2	142	0.722164	0.766742	CDS_1050_Unigene_2249|CDS_4585_Unigene_8939	http://www.genome.jp/kegg-bin/show_pathway?ath04120/ath:AT3G17000%09red/ath:AT1G55860%09red
2-Oxocarboxylic acid metabolism	KEGG PATHWAY	ath01210	1	74	0.735729	0.771618	CDS_8862_Unigene_16319	http://www.genome.jp/kegg-bin/show_pathway?ath01210/ath:AT1G24100%09red
Phenylpropanoid biosynthesis	KEGG PATHWAY	ath00940	2	157	0.771251	0.792672	CDS_24208_Unigene_39206|CDS_31757_Unigene_50169	http://www.genome.jp/kegg-bin/show_pathway?ath00940/ath:AT2G40890%09red/ath:AT5G20950%09red
Purine metabolism	KEGG PATHWAY	ath00230	2	158	0.774238	0.792672	CDS_13064_Unigene_22905|CDS_14008_Unigene_24287	http://www.genome.jp/kegg-bin/show_pathway?ath00230/ath:AT3G27060%09red/ath:AT4G15950%09red
Peroxisome	KEGG PATHWAY	ath04146	1	87	0.790245	0.799542	CDS_3349_Unigene_6696	http://www.genome.jp/kegg-bin/show_pathway?ath04146/ath:AT3G11980%09red
Ribosome biogenesis in eukaryotes	KEGG PATHWAY	ath03008	1	100	0.833533	0.833533	CDS_2754_Unigene_5536	http://www.genome.jp/kegg-bin/show_pathway?ath03008/ath:AT1G67120%09red
#Term	Database	ID	Input number	Background number	P-Value	Corrected P-Value	Input	Hyperlink
#Term	Database	ID	Input number	Background number	P-Value	Corrected P-Value	Input	Hyperlink
--------------------
--------------------
--------------------

## Sheet: DROUGHT Up-regulated
		#Term	Database	ID	Input number	Background number	P-Value	Corrected P-Value	Input	Hyperlink
		Carbon metabolism	KEGG PATHWAY	ath01200	14	262	0.00209038	0.0792472	CDS_14936_Unigene_25225|CDS_224_Unigene_498|CDS_14934_Unigene_25223|CDS_4571_Unigene_8883|CDS_26978_Unigene_41975|CDS_16786_Unigene_27898|CDS_31304_Unigene_48052|CDS_22529_Unigene_35843|CDS_13857_Unigene_23665|CDS_23721_Unigene_37494|CDS_5473_Unigene_10626|CDS_3285_Unigene_6581|CDS_33342_Unigene_50799|CDS_3256_Unigene_6521	http://www.genome.jp/kegg-bin/show_pathway?ath01200/ath:AT3G61440%09red/ath:AT1G53310%09red/ath:AT5G13110%09red/ath:AT5G50850%09red/ath:AT4G26530%09red/ath:AT4G34200%09red/ath:AT5G42250%09red/ath:AT1G12550%09red/ath:AT1G17745%09red/ath:AT5G35790%09red/ath:AT5G44520%09red/ath:AT3G54050%09red/ath:AT5G56760%09red
		Pentose phosphate pathway	KEGG PATHWAY	ath00030	6	58	0.00214182	0.0792472	CDS_14936_Unigene_25225|CDS_224_Unigene_498|CDS_14934_Unigene_25223|CDS_22529_Unigene_35843|CDS_3285_Unigene_6581|CDS_33342_Unigene_50799	http://www.genome.jp/kegg-bin/show_pathway?ath00030/ath:AT3G54050%09red/ath:AT5G35790%09red/ath:AT5G44520%09red/ath:AT5G13110%09red/ath:AT4G26530%09red
		Carbon fixation in photosynthetic organisms	KEGG PATHWAY	ath00710	5	69	0.019115	0.471504	CDS_14936_Unigene_25225|CDS_31304_Unigene_48052|CDS_3285_Unigene_6581|CDS_14934_Unigene_25223|CDS_22529_Unigene_35843	http://www.genome.jp/kegg-bin/show_pathway?ath00710/ath:AT3G54050%09red/ath:AT1G53310%09red/ath:AT5G44520%09red/ath:AT4G26530%09red
		RNA degradation	KEGG PATHWAY	ath03018	6	112	0.0371667	0.544424	CDS_13434_Unigene_23100|CDS_14065_Unigene_23976|CDS_28204_Unigene_43690|CDS_32815_Unigene_50073|CDS_31932_Unigene_48851|CDS_5867_Unigene_11509	http://www.genome.jp/kegg-bin/show_pathway?ath03018/ath:AT1G49760%09red/ath:AT3G13300%09red/ath:AT5G27720%09red/ath:AT5G60170%09red/ath:AT3G22270%09red/ath:AT2G01130%09red
		Pyrimidine metabolism	KEGG PATHWAY	ath00240	6	116	0.0426024	0.544424	CDS_13924_Unigene_23751|CDS_2838_Unigene_5812|CDS_30876_Unigene_47446|CDS_25133_Unigene_39444|CDS_18673_Unigene_30517|CDS_36177_Unigene_57083	http://www.genome.jp/kegg-bin/show_pathway?ath00240/ath:AT5G41880%09red/ath:AT4G14930%09red/ath:AT3G07800%09red/ath:AT5G67100%09red/ath:AT4G25180%09red/ath:AT1G50510%09red
		Circadian rhythm - plant	KEGG PATHWAY	ath04712	3	36	0.0472085	0.544424	CDS_3513_Unigene_7052|CDS_2215_Unigene_4732|CDS_9885_Unigene_17808	http://www.genome.jp/kegg-bin/show_pathway?ath04712/ath:AT1G65480%09red/ath:AT5G24470%09red/ath:AT2G32950%09red
		Butanoate metabolism	KEGG PATHWAY	ath00650	2	17	0.0585987	0.544424	CDS_27493_Unigene_42670|CDS_31458_Unigene_48251	http://www.genome.jp/kegg-bin/show_pathway?ath00650/ath:AT2G26800%09red/ath:AT3G48560%09red
		Spliceosome	KEGG PATHWAY	ath03040	8	192	0.0588567	0.544424	CDS_18594_Unigene_30416|CDS_14455_Unigene_24504|CDS_21401_Unigene_34325|CDS_1041_Unigene_2276|CDS_21198_Unigene_34046|CDS_33897_Unigene_51559|CDS_17754_Unigene_29241|CDS_5867_Unigene_11509	http://www.genome.jp/kegg-bin/show_pathway?ath03040/ath:AT5G10370%09red/ath:AT5G27720%09red/ath:AT1G04510%09red/ath:AT5G63120%09red/ath:AT2G33440%09red/ath:AT1G27900%09red/ath:AT1G80070%09red/ath:AT5G37370%09red
		Endocytosis	KEGG PATHWAY	ath04144	6	142	0.0896731	0.626645	CDS_34892_Unigene_53878|CDS_24162_Unigene_38073|CDS_16275_Unigene_27177|CDS_7559_Unigene_14211|CDS_25158_Unigene_39460|CDS_7551_Unigene_14197	http://www.genome.jp/kegg-bin/show_pathway?ath04144/ath:AT3G07940%09red/ath:AT5G11710%09red/ath:AT1G71790%09red/ath:AT4G35790%09red/ath:AT1G48790%09red/ath:AT5G13860%09red
		DNA replication	KEGG PATHWAY	ath03030	3	50	0.0981989	0.626645	CDS_13924_Unigene_23751|CDS_25133_Unigene_39444|CDS_6123_Unigene_11887	http://www.genome.jp/kegg-bin/show_pathway?ath03030/ath:AT5G41880%09red/ath:AT5G67100%09red/ath:AT5G26680%09red
		Aminoacyl-tRNA biosynthesis	KEGG PATHWAY	ath00970	5	115	0.106078	0.626645	CDS_3437_Unigene_6880|CDS_27928_Unigene_43282|CDS_20487_Unigene_32989|CDS_19844_Unigene_32148|CDS_32284_Unigene_49347	http://www.genome.jp/kegg-bin/show_pathway?ath00970/ath:AT4G13780%09red/ath:AT4G17300%09red/ath:AT5G22800%09red/ath:AT3G46100%09red/ath:AT3G58140%09red
		Glycolysis / Gluconeogenesis	KEGG PATHWAY	ath00010	5	117	0.111707	0.626645	CDS_14936_Unigene_25225|CDS_13857_Unigene_23665|CDS_3285_Unigene_6581|CDS_14934_Unigene_25223|CDS_16786_Unigene_27898	http://www.genome.jp/kegg-bin/show_pathway?ath00010/ath:AT5G42250%09red/ath:AT5G50850%09red/ath:AT3G54050%09red/ath:AT4G26530%09red
		Lysine degradation	KEGG PATHWAY	ath00310	2	26	0.114809	0.626645	CDS_1239_Unigene_2741|CDS_15275_Unigene_25751	http://www.genome.jp/kegg-bin/show_pathway?ath00310/ath:AT1G73100%09red/ath:AT4G33150%09red
		Glycerophospholipid metabolism	KEGG PATHWAY	ath00564	4	86	0.118554	0.626645	CDS_16314_Unigene_27221|CDS_15497_Unigene_26091|CDS_2441_Unigene_5146|CDS_7551_Unigene_14197	http://www.genome.jp/kegg-bin/show_pathway?ath00564/ath:AT4G35790%09red/ath:AT3G05510%09red/ath:AT2G32260%09red/ath:AT2G39290%09red
		Plant hormone signal transduction	KEGG PATHWAY	ath04075	9	271	0.132418	0.635244	CDS_28023_Unigene_43422|CDS_17882_Unigene_29403|CDS_207_Unigene_472|CDS_28098_Unigene_43537|CDS_1831_Unigene_3945|CDS_13608_Unigene_23312|CDS_18555_Unigene_30359|CDS_34533_Unigene_52945|CDS_26523_Unigene_41391	http://www.genome.jp/kegg-bin/show_pathway?ath04075/ath:AT2G38120%09red/ath:AT2G25490%09red/ath:AT3G23150%09red/ath:AT3G15540%09red/ath:AT2G25180%09red/ath:AT3G62980%09red/ath:AT2G47750%09red/ath:AT2G33860%09red/ath:AT1G77690%09red
		Fructose and mannose metabolism	KEGG PATHWAY	ath00051	3	64	0.163568	0.635244	CDS_14936_Unigene_25225|CDS_3285_Unigene_6581|CDS_14934_Unigene_25223	http://www.genome.jp/kegg-bin/show_pathway?ath00051/ath:AT3G54050%09red/ath:AT4G26530%09red
		Ribosome biogenesis in eukaryotes	KEGG PATHWAY	ath03008	4	100	0.171862	0.635244	CDS_7455_Unigene_14061|CDS_15798_Unigene_26527|CDS_21568_Unigene_34526|CDS_21547_Unigene_34507	http://www.genome.jp/kegg-bin/show_pathway?ath03008/ath:AT2G18900%09red/ath:AT3G55620%09red/ath:AT1G80770%09red/ath:AT5G11240%09red
		Non-homologous end-joining	KEGG PATHWAY	ath03450	1	8	0.172544	0.635244	CDS_6123_Unigene_11887	http://www.genome.jp/kegg-bin/show_pathway?ath03450/ath:AT5G26680%09red
		Protein processing in endoplasmic reticulum	KEGG PATHWAY	ath04141	7	212	0.173955	0.635244	CDS_5273_Unigene_10191|CDS_32331_Unigene_49408|CDS_28653_Unigene_44330|CDS_934_Unigene_2123|CDS_12906_Unigene_22322|CDS_32373_Unigene_49467|CDS_4663_Unigene_9032	http://www.genome.jp/kegg-bin/show_pathway?ath04141/ath:AT5G03340%09red/ath:AT3G07100%09red/ath:AT3G16090%09red/ath:AT3G09350%09red/ath:AT1G05520%09red/ath:AT1G04980%09red/ath:AT4G27470%09red
		Biosynthesis of amino acids	KEGG PATHWAY	ath01230	8	255	0.18469	0.635244	CDS_14936_Unigene_25225|CDS_14934_Unigene_25223|CDS_26978_Unigene_41975|CDS_22529_Unigene_35843|CDS_23721_Unigene_37494|CDS_5473_Unigene_10626|CDS_31458_Unigene_48251|CDS_3256_Unigene_6521	http://www.genome.jp/kegg-bin/show_pathway?ath01230/ath:AT3G61440%09red/ath:AT3G48560%09red/ath:AT4G26530%09red/ath:AT4G34200%09red/ath:AT5G56760%09red/ath:AT1G17745%09red/ath:AT5G44520%09red
		Linoleic acid metabolism	KEGG PATHWAY	ath00591	1	9	0.189778	0.635244	CDS_27686_Unigene_42944	http://www.genome.jp/kegg-bin/show_pathway?ath00591/ath:AT1G67560%09red
		Glycine, serine and threonine metabolism	KEGG PATHWAY	ath00260	3	72	0.205413	0.635244	CDS_23721_Unigene_37494|CDS_4571_Unigene_8883|CDS_3256_Unigene_6521	http://www.genome.jp/kegg-bin/show_pathway?ath00260/ath:AT1G17745%09red/ath:AT1G12550%09red/ath:AT4G34200%09red
		C5-Branched dibasic acid metabolism	KEGG PATHWAY	ath00660	1	10	0.206654	0.635244	CDS_31458_Unigene_48251	http://www.genome.jp/kegg-bin/show_pathway?ath00660/ath:AT3G48560%09red
		Tyrosine metabolism	KEGG PATHWAY	ath00350	2	40	0.217662	0.635244	CDS_16786_Unigene_27898|CDS_24583_Unigene_38653	http://www.genome.jp/kegg-bin/show_pathway?ath00350/ath:AT5G42250%09red/ath:AT2G02380%09red
		Thiamine metabolism	KEGG PATHWAY	ath00730	1	11	0.223179	0.635244	CDS_11611_Unigene_20367	http://www.genome.jp/kegg-bin/show_pathway?ath00730/ath:AT2G29630%09red
		Sulfur metabolism	KEGG PATHWAY	ath00920	2	41	0.225351	0.635244	CDS_5473_Unigene_10626|CDS_26978_Unigene_41975	http://www.genome.jp/kegg-bin/show_pathway?ath00920/ath:AT3G61440%09red/ath:AT5G56760%09red
		mRNA surveillance pathway	KEGG PATHWAY	ath03015	4	114	0.231778	0.635244	CDS_11707_Unigene_20502|CDS_27277_Unigene_42365|CDS_12717_Unigene_22029|CDS_32815_Unigene_50073	http://www.genome.jp/kegg-bin/show_pathway?ath03015/ath:AT4G29820%09red/ath:AT2G42500%09red/ath:AT4G04885%09red/ath:AT1G49760%09red
		Base excision repair	KEGG PATHWAY	ath03410	2	43	0.240783	0.636356	CDS_30470_Unigene_46854|CDS_6123_Unigene_11887	http://www.genome.jp/kegg-bin/show_pathway?ath03410/ath:AT5G26680%09red/ath:AT5G57970%09red
		Purine metabolism	KEGG PATHWAY	ath00230	5	158	0.253144	0.645954	CDS_2838_Unigene_5812|CDS_8299_Unigene_15406|CDS_13924_Unigene_23751|CDS_30876_Unigene_47446|CDS_25133_Unigene_39444	http://www.genome.jp/kegg-bin/show_pathway?ath00230/ath:AT5G41880%09red/ath:AT5G67100%09red/ath:AT4G25180%09red/ath:AT4G14930%09red/ath:AT5G35170%09red
		Phagosome	KEGG PATHWAY	ath04145	3	86	0.283137	0.666742	CDS_2561_Unigene_5345|CDS_30316_Unigene_46645|CDS_11393_Unigene_20011	http://www.genome.jp/kegg-bin/show_pathway?ath04145/ath:AT3G42050%09red/ath:AT1G75780%09red/ath:AT1G34260%09red
		Peroxisome	KEGG PATHWAY	ath04146	3	87	0.288812	0.666742	CDS_27493_Unigene_42670|CDS_3889_Unigene_7806|CDS_209_Unigene_474	http://www.genome.jp/kegg-bin/show_pathway?ath04146/ath:AT2G39970%09red/ath:AT5G17550%09red/ath:AT2G26800%09red
		Plant-pathogen interaction	KEGG PATHWAY	ath04626	5	167	0.288873	0.666742	CDS_32488_Unigene_49618|CDS_27536_Unigene_42736|CDS_1181_Unigene_2585|CDS_2491_Unigene_5236|CDS_5176_Unigene_9996	http://www.genome.jp/kegg-bin/show_pathway?ath04626/ath:AT5G57940%09red/ath:AT5G15410%09red/ath:AT3G48080%09red/ath:AT5G42380%09red/ath:AT5G53130%09red
		Nicotinate and nicotinamide metabolism	KEGG PATHWAY	ath00760	1	16	0.30079	0.666742	CDS_2838_Unigene_5812	http://www.genome.jp/kegg-bin/show_pathway?ath00760/ath:AT4G14930%09red
		Metabolic pathways	KEGG PATHWAY	ath01100	44	1910	0.315605	0.666742	CDS_2180_Unigene_4662|CDS_224_Unigene_498|CDS_12885_Unigene_22292|CDS_7239_Unigene_13710|CDS_2838_Unigene_5812|CDS_30316_Unigene_46645|CDS_31304_Unigene_48052|CDS_20483_Unigene_32982|CDS_13857_Unigene_23665|CDS_5473_Unigene_10626|CDS_14936_Unigene_25225|CDS_16314_Unigene_27221|CDS_1239_Unigene_2741|CDS_19418_Unigene_31559|CDS_8299_Unigene_15406|CDS_24583_Unigene_38653|CDS_15497_Unigene_26091|CDS_…	http://www.genome.jp/kegg-bin/show_pathway?ath01100/ath:AT3G61440%09red/ath:AT1G44446%09red/ath:AT5G13110%09red/ath:AT5G67100%09red/ath:AT1G67560%09red/ath:AT1G12550%09red/ath:AT1G72680%09red/ath:AT1G53000%09red/ath:AT3G07800%09red/ath:AT5G35790%09red/ath:AT2G29630%09red/ath:AT4G25180%09red/ath:AT2G39290%09red/ath:AT3G48360%09red/ath:AT3G23920%09red/ath:AT5G35170%09red/ath:AT4G33150%09red/ath:AT5…
		Other glycan degradation	KEGG PATHWAY	ath00511	1	18	0.329622	0.666742	CDS_8775_Unigene_16184	http://www.genome.jp/kegg-bin/show_pathway?ath00511/ath:AT2G28100%09red
		Selenocompound metabolism	KEGG PATHWAY	ath00450	1	18	0.329622	0.666742	CDS_19844_Unigene_32148	http://www.genome.jp/kegg-bin/show_pathway?ath00450/ath:AT4G13780%09red
		Galactose metabolism	KEGG PATHWAY	ath00052	2	55	0.333371	0.666742	CDS_14834_Unigene_25066|CDS_7239_Unigene_13710	http://www.genome.jp/kegg-bin/show_pathway?ath00052/ath:AT5G20250%09red/ath:AT1G12780%09red
		Biosynthesis of secondary metabolites	KEGG PATHWAY	ath01110	25	1076	0.35674	0.694704	CDS_224_Unigene_498|CDS_2180_Unigene_4662|CDS_12885_Unigene_22292|CDS_2838_Unigene_5812|CDS_13857_Unigene_23665|CDS_5473_Unigene_10626|CDS_14936_Unigene_25225|CDS_1239_Unigene_2741|CDS_19418_Unigene_31559|CDS_8299_Unigene_15406|CDS_7551_Unigene_14197|CDS_14934_Unigene_25223|CDS_20422_Unigene_32901|CDS_36387_Unigene_57424|CDS_22529_Unigene_35843|CDS_27686_Unigene_42944|CDS_3285_Unigene_6581|CDS_31…	http://www.genome.jp/kegg-bin/show_pathway?ath01110/ath:AT3G61440%09red/ath:AT1G44446%09red/ath:AT5G13110%09red/ath:AT5G50850%09red/ath:AT1G67560%09red/ath:AT1G12550%09red/ath:AT1G72680%09red/ath:AT5G35790%09red/ath:AT3G48360%09red/ath:AT5G35170%09red/ath:AT4G33150%09red/ath:AT2G22420%09red/ath:AT3G48560%09red/ath:AT4G26530%09red/ath:AT4G35790%09red/ath:AT1G02205%09red/ath:AT3G29320%09red/ath:AT3…
		Cyanoamino acid metabolism	KEGG PATHWAY	ath00460	2	60	0.371149	0.704231	CDS_20422_Unigene_32901|CDS_26978_Unigene_41975	http://www.genome.jp/kegg-bin/show_pathway?ath00460/ath:AT3G61440%09red/ath:AT5G20950%09red
		Valine, leucine and isoleucine biosynthesis	KEGG PATHWAY	ath00290	1	23	0.396615	0.704424	CDS_31458_Unigene_48251	http://www.genome.jp/kegg-bin/show_pathway?ath00290/ath:AT3G48560%09red
		Zeatin biosynthesis	KEGG PATHWAY	ath00908	1	23	0.396615	0.704424	CDS_24677_Unigene_38777	http://www.genome.jp/kegg-bin/show_pathway?ath00908/ath:AT2G41510%09red
		Phosphatidylinositol signaling system	KEGG PATHWAY	ath04070	2	68	0.42967	0.704424	CDS_21199_Unigene_34050|CDS_2561_Unigene_5345	http://www.genome.jp/kegg-bin/show_pathway?ath04070/ath:AT4G08170%09red/ath:AT1G34260%09red
		Inositol phosphate metabolism	KEGG PATHWAY	ath00562	2	68	0.42967	0.704424	CDS_21199_Unigene_34050|CDS_2561_Unigene_5345	http://www.genome.jp/kegg-bin/show_pathway?ath00562/ath:AT4G08170%09red/ath:AT1G34260%09red
		Cysteine and methionine metabolism	KEGG PATHWAY	ath00270	3	112	0.43013	0.704424	CDS_5473_Unigene_10626|CDS_32859_Unigene_50132|CDS_26978_Unigene_41975	http://www.genome.jp/kegg-bin/show_pathway?ath00270/ath:AT3G61440%09red/ath:AT4G13940%09red/ath:AT5G56760%09red
		Starch and sucrose metabolism	KEGG PATHWAY	ath00500	5	202	0.432337	0.704424	CDS_20422_Unigene_32901|CDS_25297_Unigene_39653|CDS_2974_Unigene_6022|CDS_20483_Unigene_32982|CDS_20512_Unigene_33040	http://www.genome.jp/kegg-bin/show_pathway?ath00500/ath:AT2G01630%09red/ath:AT4G17090%09red/ath:AT3G29320%09red/ath:AT5G20950%09red/ath:AT3G23920%09red
		Ether lipid metabolism	KEGG PATHWAY	ath00565	1	27	0.445364	0.704424	CDS_7551_Unigene_14197	http://www.genome.jp/kegg-bin/show_pathway?ath00565/ath:AT4G35790%09red
		Cutin, suberine and wax biosynthesis	KEGG PATHWAY	ath00073	1	28	0.456923	0.704424	CDS_27729_Unigene_43014	http://www.genome.jp/kegg-bin/show_pathway?ath00073/ath:AT1G02205%09red
		Pantothenate and CoA biosynthesis	KEGG PATHWAY	ath00770	1	28	0.456923	0.704424	CDS_31458_Unigene_48251	http://www.genome.jp/kegg-bin/show_pathway?ath00770/ath:AT3G48560%09red
		Carotenoid biosynthesis	KEGG PATHWAY	ath00906	1	29	0.468243	0.707142	CDS_17863_Unigene_29378	http://www.genome.jp/kegg-bin/show_pathway?ath00906/ath:AT4G19170%09red
		RNA transport	KEGG PATHWAY	ath03013	4	169	0.486963	0.720706	CDS_32815_Unigene_50073|CDS_26977_Unigene_41973|CDS_29743_Unigene_45829|CDS_24335_Unigene_38293	http://www.genome.jp/kegg-bin/show_pathway?ath03013/ath:AT3G60240%09red/ath:AT2G41620%09red/ath:AT4G27130%09red/ath:AT1G49760%09red
		alpha-Linolenic acid metabolism	KEGG PATHWAY	ath00592	1	36	0.54115	0.763934	CDS_27686_Unigene_42944	http://www.genome.jp/kegg-bin/show_pathway?ath00592/ath:AT1G67560%09red
		Pyruvate metabolism	KEGG PATHWAY	ath00620	2	85	0.543461	0.763934	CDS_31304_Unigene_48052|CDS_13857_Unigene_23665	http://www.genome.jp/kegg-bin/show_pathway?ath00620/ath:AT5G50850%09red/ath:AT1G53310%09red
		Mismatch repair	KEGG PATHWAY	ath03430	1	39	0.569257	0.763934	CDS_26716_Unigene_41643	http://www.genome.jp/kegg-bin/show_pathway?ath03430/ath:AT4G35520%09red
		Ubiquitin mediated proteolysis	KEGG PATHWAY	ath04120	3	142	0.584048	0.763934	CDS_17754_Unigene_29241|CDS_2215_Unigene_4732|CDS_934_Unigene_2123	http://www.genome.jp/kegg-bin/show_pathway?ath04120/ath:AT1G04510%09red/ath:AT3G16090%09red/ath:AT2G32950%09red
		Fatty acid degradation	KEGG PATHWAY	ath00071	1	41	0.587033	0.763934	CDS_16786_Unigene_27898	http://www.genome.jp/kegg-bin/show_pathway?ath00071/ath:AT5G42250%09red
		Glutathione metabolism	KEGG PATHWAY	ath00480	2	93	0.591282	0.763934	CDS_224_Unigene_498|CDS_33342_Unigene_50799	http://www.genome.jp/kegg-bin/show_pathway?ath00480/ath:AT5G35790%09red/ath:AT5G13110%09red
		Limonene and pinene degradation	KEGG PATHWAY	ath00903	1	44	0.612333	0.763934	CDS_19418_Unigene_31559	http://www.genome.jp/kegg-bin/show_pathway?ath00903/ath:AT3G48360%09red
		RNA polymerase	KEGG PATHWAY	ath03020	1	45	0.620418	0.763934	CDS_30876_Unigene_47446	http://www.genome.jp/kegg-bin/show_pathway?ath03020/ath:AT4G25180%09red
		Stilbenoid, diarylheptanoid and gingerol biosynthesis	KEGG PATHWAY	ath00945	1	46	0.628334	0.763934	CDS_19418_Unigene_31559	http://www.genome.jp/kegg-bin/show_pathway?ath00945/ath:AT3G48360%09red
		SNARE interactions in vesicular transport	KEGG PATHWAY	ath04130	1	48	0.643676	0.763934	CDS_16244_Unigene_27146	http://www.genome.jp/kegg-bin/show_pathway?ath04130/ath:AT5G22360%09red
		Valine, leucine and isoleucine degradation	KEGG PATHWAY	ath00280	1	48	0.643676	0.763934	CDS_27493_Unigene_42670	http://www.genome.jp/kegg-bin/show_pathway?ath00280/ath:AT2G26800%09red
		Porphyrin and chlorophyll metabolism	KEGG PATHWAY	ath00860	1	48	0.643676	0.763934	CDS_2180_Unigene_4662	http://www.genome.jp/kegg-bin/show_pathway?ath00860/ath:AT1G44446%09red
		Phenylpropanoid biosynthesis	KEGG PATHWAY	ath00940	3	157	0.650376	0.763934	CDS_36387_Unigene_57424|CDS_20422_Unigene_32901|CDS_12885_Unigene_22292	http://www.genome.jp/kegg-bin/show_pathway?ath00940/ath:AT5G20950%09red/ath:AT1G72680%09red/ath:AT2G22420%09red
		Oxidative phosphorylation	KEGG PATHWAY	ath00190	3	162	0.670736	0.772003	CDS_33707_Unigene_51282|CDS_30316_Unigene_46645|CDS_30734_Unigene_47226	http://www.genome.jp/kegg-bin/show_pathway?ath00190/ath:AT3G42050%09red/ath:AT5G08690%09red/ath:AT4G30190%09red
		Protein export	KEGG PATHWAY	ath03060	1	53	0.679321	0.772003	CDS_31131_Unigene_47804	http://www.genome.jp/kegg-bin/show_pathway?ath03060/ath:AT5G03940%09red
		Basal transcription factors	KEGG PATHWAY	ath03022	1	55	0.692562	0.772003	CDS_26045_Unigene_40705	http://www.genome.jp/kegg-bin/show_pathway?ath03022/ath:AT1G73960%09red
		Homologous recombination	KEGG PATHWAY	ath03440	1	56	0.698976	0.772003	CDS_16924_Unigene_28103	http://www.genome.jp/kegg-bin/show_pathway?ath03440/ath:AT4G35740%09red
		Proteasome	KEGG PATHWAY	ath03050	1	58	0.711406	0.774177	CDS_14612_Unigene_24754	http://www.genome.jp/kegg-bin/show_pathway?ath03050/ath:AT2G20580%09red
		Citrate cycle (TCA cycle)	KEGG PATHWAY	ath00020	1	63	0.740285	0.793929	CDS_13857_Unigene_23665	http://www.genome.jp/kegg-bin/show_pathway?ath00020/ath:AT5G50850%09red
		Glyoxylate and dicarboxylate metabolism	KEGG PATHWAY	ath00630	1	74	0.794067	0.827619	CDS_4571_Unigene_8883	http://www.genome.jp/kegg-bin/show_pathway?ath00630/ath:AT1G12550%09red
		2-Oxocarboxylic acid metabolism	KEGG PATHWAY	ath01210	1	74	0.794067	0.827619	CDS_31458_Unigene_48251	http://www.genome.jp/kegg-bin/show_pathway?ath01210/ath:AT3G48560%09red
		Photosynthesis	KEGG PATHWAY	ath00195	1	77	0.806698	0.829106	CDS_17433_Unigene_28836	http://www.genome.jp/kegg-bin/show_pathway?ath00195/ath:AT1G20340%09red
		Amino sugar and nucleotide sugar metabolism	KEGG PATHWAY	ath00520	1	135	0.943221	0.956142	CDS_7239_Unigene_13710	http://www.genome.jp/kegg-bin/show_pathway?ath00520/ath:AT1G12780%09red
		Ribosome	KEGG PATHWAY	ath03010	1	363	0.999551	0.999551	CDS_22548_Unigene_35872	http://www.genome.jp/kegg-bin/show_pathway?ath03010/ath:AT5G60670%09red
		#Term	Database	ID	Input number	Background number	P-Value	Corrected P-Value	Input	Hyperlink
		#Term	Database	ID	Input number	Background number	P-Value	Corrected P-Value	Input	Hyperlink
		--------------------
		--------------------
		--------------------

## Sheet: DROUGHT Down-regulated
#Term	Database	ID	Input number	Background number	P-Value	Corrected P-Value	Input	Hyperlink
Starch and sucrose metabolism	KEGG PATHWAY	ath00500	11	202	0.00596017	0.168248	CDS_1258_Unigene_2779|CDS_33_Unigene_94|CDS_5558_Unigene_10814|CDS_8283_Unigene_15385|CDS_8927_Unigene_16433|CDS_5201_Unigene_10054|CDS_7838_Unigene_14655|CDS_3388_Unigene_6761|CDS_18763_Unigene_30663|CDS_8223_Unigene_15278|CDS_540_Unigene_1178	http://www.genome.jp/kegg-bin/show_pathway?ath00500/ath:AT1G53830%09red/ath:AT5G47780%09red/ath:AT4G17770%09red/ath:AT2G01630%09red/ath:AT5G19730%09red/ath:AT2G20810%09red/ath:AT1G73370%09red/ath:AT3G58790%09red/ath:AT5G20950%09red/ath:AT3G23820%09red/ath:AT2G18700%09red
Ribosome biogenesis in eukaryotes	KEGG PATHWAY	ath03008	7	100	0.00777498	0.168248	CDS_1080_Unigene_2329|CDS_2438_Unigene_5142|CDS_30384_Unigene_46748|CDS_10107_Unigene_18135|CDS_28514_Unigene_44136|CDS_13887_Unigene_23699|CDS_22565_Unigene_35890	http://www.genome.jp/kegg-bin/show_pathway?ath03008/ath:AT5G42540%09red/ath:AT1G67120%09red/ath:AT5G55190%09red/ath:AT3G06530%09red/ath:AT1G10490%09red/ath:AT1G63810%09red/ath:AT3G01610%09red
Glycosphingolipid biosynthesis - ganglio series	KEGG PATHWAY	ath00604	2	5	0.00875605	0.168248	CDS_31632_Unigene_48498|CDS_144_Unigene_377	http://www.genome.jp/kegg-bin/show_pathway?ath00604/ath:AT1G05590%09red/ath:AT1G72990%09red
Galactose metabolism	KEGG PATHWAY	ath00052	5	55	0.008771	0.168248	CDS_10575_Unigene_18806|CDS_6852_Unigene_13018|CDS_619_Unigene_1384|CDS_11772_Unigene_20617|CDS_31632_Unigene_48498	http://www.genome.jp/kegg-bin/show_pathway?ath00052/ath:AT5G20250%09red/ath:AT1G72990%09red/ath:AT5G40390%09red/ath:AT4G10960%09red/ath:AT3G57520%09red
Other glycan degradation	KEGG PATHWAY	ath00511	3	18	0.00945214	0.168248	CDS_29215_Unigene_45117|CDS_31632_Unigene_48498|CDS_144_Unigene_377	http://www.genome.jp/kegg-bin/show_pathway?ath00511/ath:AT1G05590%09red/ath:AT1G72990%09red/ath:AT5G13980%09red
Amino sugar and nucleotide sugar metabolism	KEGG PATHWAY	ath00520	8	135	0.0113579	0.168475	CDS_437_Unigene_952|CDS_6852_Unigene_13018|CDS_3924_Unigene_7860|CDS_8927_Unigene_16433|CDS_18763_Unigene_30663|CDS_8223_Unigene_15278|CDS_540_Unigene_1178|CDS_144_Unigene_377	http://www.genome.jp/kegg-bin/show_pathway?ath00520/ath:AT5G47780%09red/ath:AT2G34850%09red/ath:AT2G20810%09red/ath:AT1G05590%09red/ath:AT3G58790%09red/ath:AT3G54420%09red/ath:AT4G10960%09red/ath:AT3G23820%09red
Glycosaminoglycan degradation	KEGG PATHWAY	ath00531	2	7	0.0145951	0.185566	CDS_31632_Unigene_48498|CDS_144_Unigene_377	http://www.genome.jp/kegg-bin/show_pathway?ath00531/ath:AT1G05590%09red/ath:AT1G72990%09red
Glycosphingolipid biosynthesis - globo series	KEGG PATHWAY	ath00603	2	9	0.0216834	0.226758	CDS_8685_Unigene_16046|CDS_144_Unigene_377	http://www.genome.jp/kegg-bin/show_pathway?ath00603/ath:AT1G05590%09red/ath:AT1G61050%09red
Sphingolipid metabolism	KEGG PATHWAY	ath00600	3	26	0.0229306	0.226758	CDS_3314_Unigene_6622|CDS_31632_Unigene_48498|CDS_17659_Unigene_29145	http://www.genome.jp/kegg-bin/show_pathway?ath00600/ath:AT5G51290%09red/ath:AT1G72990%09red/ath:AT4G21540%09red
Arginine and proline metabolism	KEGG PATHWAY	ath00330	4	53	0.0325197	0.243777	CDS_754_Unigene_1726|CDS_4947_Unigene_9586|CDS_10496_Unigene_18690|CDS_31268_Unigene_47988	http://www.genome.jp/kegg-bin/show_pathway?ath00330/ath:AT5G13700%09red/ath:AT3G06300%09red/ath:AT3G55610%09red/ath:AT4G29720%09red
RNA transport	KEGG PATHWAY	ath03013	8	169	0.0353177	0.243777	CDS_29741_Unigene_45827|CDS_6138_Unigene_11909|CDS_9596_Unigene_17404|CDS_18446_Unigene_30204|CDS_873_Unigene_2037|CDS_3252_Unigene_6512|CDS_11450_Unigene_20105|CDS_22565_Unigene_35890	http://www.genome.jp/kegg-bin/show_pathway?ath03013/ath:AT2G05120%09red/ath:AT2G39260%09red/ath:AT3G08943%09red/ath:AT3G60240%09red/ath:AT5G27640%09red/ath:AT5G55190%09red/ath:AT4G38760%09red/ath:AT2G13540%09red
Homologous recombination	KEGG PATHWAY	ath03440	4	56	0.038233	0.243777	CDS_30408_Unigene_46771|CDS_6667_Unigene_12660|CDS_16556_Unigene_27528|CDS_11981_Unigene_20934	http://www.genome.jp/kegg-bin/show_pathway?ath03440/ath:AT2G06510%09red/ath:AT5G20420%09red/ath:AT4G30870%09red/ath:AT5G08020%09red
Endocytosis	KEGG PATHWAY	ath04144	7	142	0.0396997	0.243777	CDS_32774_Unigene_50021|CDS_32278_Unigene_49337|CDS_2161_Unigene_4629|CDS_25726_Unigene_40262|CDS_20262_Unigene_32683|CDS_16471_Unigene_27423|CDS_8217_Unigene_15271	http://www.genome.jp/kegg-bin/show_pathway?ath04144/ath:AT5G11710%09red/ath:AT3G15730%09red/ath:AT5G22780%09red/ath:AT5G19610%09red/ath:AT5G22950%09red/ath:AT2G37550%09red/ath:AT3G60860%09red
Metabolic pathways	KEGG PATHWAY	ath01100	53	1910	0.0412235	0.243777	CDS_30241_Unigene_46513|CDS_19490_Unigene_31671|CDS_34325_Unigene_52442|CDS_656_Unigene_1477|CDS_3314_Unigene_6622|CDS_144_Unigene_377|CDS_3515_Unigene_7058|CDS_31632_Unigene_48498|CDS_33775_Unigene_51376|CDS_28193_Unigene_43668|CDS_14919_Unigene_25206|CDS_33_Unigene_94|CDS_3388_Unigene_6761|CDS_1620_Unigene_3624|CDS_25459_Unigene_39886|CDS_13123_Unigene_22628|CDS_6852_Unigene_13018|CDS_21659_Uni…	http://www.genome.jp/kegg-bin/show_pathway?ath01100/ath:AT4G04955%09red/ath:AT1G32210%09red/ath:AT4G15130%09red/ath:AT5G65750%09red/ath:AT1G78590%09red/ath:AT2G34850%09red/ath:AT3G15730%09red/ath:AT3G55610%09red/ath:AT5G14760%09red/ath:AT1G30000%09red/ath:AT2G07050%09red/ath:AT3G23820%09red/ath:AT2G01140%09red/ath:AT1G13700%09red/ath:AT4G17770%09red/ath:AT4G20960%09red/ath:AT1G49820%09red/ath:AT5…
Vitamin B6 metabolism	KEGG PATHWAY	ath00750	2	14	0.0441357	0.243777	CDS_25459_Unigene_39886|CDS_21659_Unigene_34642	http://www.genome.jp/kegg-bin/show_pathway?ath00750/ath:AT5G49970%09red/ath:AT5G53580%09red
Monobactam biosynthesis	KEGG PATHWAY	ath00261	2	14	0.0441357	0.243777	CDS_3613_Unigene_7301|CDS_14419_Unigene_24449	http://www.genome.jp/kegg-bin/show_pathway?ath00261/ath:AT3G59890%09red/ath:AT2G45440%09red
Protein processing in endoplasmic reticulum	KEGG PATHWAY	ath04141	9	212	0.0465641	0.243777	CDS_7477_Unigene_14099|CDS_16061_Unigene_26886|CDS_6161_Unigene_11941|CDS_32070_Unigene_49050|CDS_545_Unigene_1187|CDS_32368_Unigene_49464|CDS_24733_Unigene_38848|CDS_14510_Unigene_24588|CDS_26994_Unigene_41997	http://www.genome.jp/kegg-bin/show_pathway?ath04141/ath:AT4G02570%09red/ath:AT1G32210%09red/ath:AT3G07100%09red/ath:AT2G17190%09red/ath:AT1G77510%09red/ath:AT1G08450%09red/ath:AT3G17000%09red/ath:AT4G02080%09red/ath:AT1G30000%09red
Lysine biosynthesis	KEGG PATHWAY	ath00300	2	16	0.0547415	0.256421	CDS_3613_Unigene_7301|CDS_14419_Unigene_24449	http://www.genome.jp/kegg-bin/show_pathway?ath00300/ath:AT3G59890%09red/ath:AT2G45440%09red
Nicotinate and nicotinamide metabolism	KEGG PATHWAY	ath00760	2	16	0.0547415	0.256421	CDS_34325_Unigene_52442|CDS_3731_Unigene_7514	http://www.genome.jp/kegg-bin/show_pathway?ath00760/ath:AT5G14760%09red/ath:AT1G78590%09red
Mismatch repair	KEGG PATHWAY	ath03430	3	39	0.0590032	0.262564	CDS_30408_Unigene_46771|CDS_5457_Unigene_10598|CDS_11981_Unigene_20934	http://www.genome.jp/kegg-bin/show_pathway?ath03430/ath:AT2G06510%09red/ath:AT5G08020%09red/ath:AT4G02070%09red
beta-Alanine metabolism	KEGG PATHWAY	ath00410	3	40	0.0624699	0.264754	CDS_754_Unigene_1726|CDS_4947_Unigene_9586|CDS_14919_Unigene_25206	http://www.genome.jp/kegg-bin/show_pathway?ath00410/ath:AT5G13700%09red/ath:AT4G12290%09red/ath:AT4G29720%09red
Carbon fixation in photosynthetic organisms	KEGG PATHWAY	ath00710	4	69	0.0691759	0.279848	CDS_19490_Unigene_31671|CDS_14486_Unigene_24550|CDS_2129_Unigene_4567|CDS_1997_Unigene_4288	http://www.genome.jp/kegg-bin/show_pathway?ath00710/ath:AT1G72330%09red/ath:AT2G01140%09red/ath:AT4G00570%09red/ath:AT3G55440%09red
Base excision repair	KEGG PATHWAY	ath03410	3	43	0.0734183	0.284097	CDS_15913_Unigene_26697|CDS_11847_Unigene_20726|CDS_35384_Unigene_55027	http://www.genome.jp/kegg-bin/show_pathway?ath03410/ath:AT2G31320%09red/ath:AT2G31450%09red/ath:AT1G52500%09red
N-Glycan biosynthesis	KEGG PATHWAY	ath00510	3	44	0.0772449	0.28645	CDS_7477_Unigene_14099|CDS_6161_Unigene_11941|CDS_6155_Unigene_11931	http://www.genome.jp/kegg-bin/show_pathway?ath00510/ath:AT1G32210%09red/ath:AT1G30000%09red/ath:AT4G16710%09red
Alanine, aspartate and glutamate metabolism	KEGG PATHWAY	ath00250	3	48	0.093391	0.332472	CDS_13074_Unigene_22561|CDS_34325_Unigene_52442|CDS_1997_Unigene_4288	http://www.genome.jp/kegg-bin/show_pathway?ath00250/ath:AT1G72330%09red/ath:AT2G13360%09red/ath:AT5G14760%09red
Sesquiterpenoid and triterpenoid biosynthesis	KEGG PATHWAY	ath00909	2	23	0.0975356	0.333872	CDS_1733_Unigene_3783|CDS_7356_Unigene_13908	http://www.genome.jp/kegg-bin/show_pathway?ath00909/ath:AT4G33360%09red/ath:AT4G37760%09red
mRNA surveillance pathway	KEGG PATHWAY	ath03015	5	114	0.108831	0.358738	CDS_18446_Unigene_30204|CDS_6550_Unigene_12507|CDS_8191_Unigene_15230|CDS_32264_Unigene_49317|CDS_9596_Unigene_17404	http://www.genome.jp/kegg-bin/show_pathway?ath03015/ath:AT2G39260%09red/ath:AT2G13540%09red/ath:AT3G09880%09red/ath:AT5G25510%09red/ath:AT5G55550%09red
ABC transporters	KEGG PATHWAY	ath02010	2	26	0.118001	0.362141	CDS_5696_Unigene_11133|CDS_4753_Unigene_9228	http://www.genome.jp/kegg-bin/show_pathway?ath02010/ath:AT2G07680%09red/ath:AT2G41700%09red
Lysine degradation	KEGG PATHWAY	ath00310	2	26	0.118001	0.362141	CDS_18021_Unigene_29592|CDS_2377_Unigene_5024	http://www.genome.jp/kegg-bin/show_pathway?ath00310/ath:AT5G65750%09red/ath:AT4G13460%09red
Proteasome	KEGG PATHWAY	ath03050	3	58	0.13897	0.412277	CDS_30972_Unigene_47583|CDS_18034_Unigene_29617|CDS_27021_Unigene_42039	http://www.genome.jp/kegg-bin/show_pathway?ath03050/ath:AT1G64520%09red/ath:AT4G29040%09red/ath:AT2G32730%09red
Monoterpenoid biosynthesis	KEGG PATHWAY	ath00902	1	7	0.15735	0.451747	CDS_6093_Unigene_11849	http://www.genome.jp/kegg-bin/show_pathway?ath00902/ath:AT2G24190%09red
Fructose and mannose metabolism	KEGG PATHWAY	ath00051	3	64	0.169259	0.470751	CDS_19490_Unigene_31671|CDS_27715_Unigene_42987|CDS_2129_Unigene_4567	http://www.genome.jp/kegg-bin/show_pathway?ath00051/ath:AT2G01140%09red/ath:AT4G28320%09red/ath:AT3G55440%09red
Steroid biosynthesis	KEGG PATHWAY	ath00100	2	35	0.184311	0.48991	CDS_30241_Unigene_46513|CDS_7356_Unigene_13908	http://www.genome.jp/kegg-bin/show_pathway?ath00100/ath:AT4G37760%09red/ath:AT2G07050%09red
Inositol phosphate metabolism	KEGG PATHWAY	ath00562	3	68	0.19041	0.48991	CDS_19490_Unigene_31671|CDS_33775_Unigene_51376|CDS_3515_Unigene_7058	http://www.genome.jp/kegg-bin/show_pathway?ath00562/ath:AT1G22100%09red/ath:AT1G49340%09red/ath:AT3G55440%09red
Riboflavin metabolism	KEGG PATHWAY	ath00740	1	9	0.192661	0.48991	CDS_20384_Unigene_32840	http://www.genome.jp/kegg-bin/show_pathway?ath00740/ath:AT4G20960%09red
Glycine, serine and threonine metabolism	KEGG PATHWAY	ath00260	3	72	0.212184	0.517889	CDS_13074_Unigene_22561|CDS_14919_Unigene_25206|CDS_13123_Unigene_22628	http://www.genome.jp/kegg-bin/show_pathway?ath00260/ath:AT4G12290%09red/ath:AT2G13360%09red/ath:AT2G26080%09red
Carbon metabolism	KEGG PATHWAY	ath01200	8	262	0.215302	0.517889	CDS_19490_Unigene_31671|CDS_2129_Unigene_4567|CDS_13123_Unigene_22628|CDS_13074_Unigene_22561|CDS_1997_Unigene_4288|CDS_21634_Unigene_34611|CDS_14486_Unigene_24550|CDS_18021_Unigene_29592	http://www.genome.jp/kegg-bin/show_pathway?ath01200/ath:AT1G13700%09red/ath:AT5G65750%09red/ath:AT2G01140%09red/ath:AT2G26080%09red/ath:AT3G55440%09red/ath:AT1G72330%09red/ath:AT2G13360%09red/ath:AT4G00570%09red
Ascorbate and aldarate metabolism	KEGG PATHWAY	ath00053	2	41	0.230899	0.528324	CDS_24526_Unigene_38550|CDS_2429_Unigene_5123	http://www.genome.jp/kegg-bin/show_pathway?ath00053/ath:AT3G27820%09red/ath:AT4G32320%09red
RNA degradation	KEGG PATHWAY	ath03018	4	112	0.231513	0.528324	CDS_28043_Unigene_43448|CDS_31933_Unigene_48852|CDS_33494_Unigene_51019|CDS_28514_Unigene_44136	http://www.genome.jp/kegg-bin/show_pathway?ath03018/ath:AT5G42540%09red/ath:AT5G60170%09red/ath:AT1G02080%09red/ath:AT3G58580%09red
Pentose and glucuronate interconversions	KEGG PATHWAY	ath00040	3	81	0.262833	0.584803	CDS_33_Unigene_94|CDS_22743_Unigene_36144|CDS_8283_Unigene_15385	http://www.genome.jp/kegg-bin/show_pathway?ath00040/ath:AT1G53830%09red/ath:AT5G19730%09red/ath:AT4G13210%09red
Tryptophan metabolism	KEGG PATHWAY	ath00380	2	46	0.270242	0.586623	CDS_18021_Unigene_29592|CDS_27423_Unigene_42576	http://www.genome.jp/kegg-bin/show_pathway?ath00380/ath:AT1G24100%09red/ath:AT5G65750%09red
SNARE interactions in vesicular transport	KEGG PATHWAY	ath04130	2	48	0.285988	0.606023	CDS_7489_Unigene_14119|CDS_2055_Unigene_4423	http://www.genome.jp/kegg-bin/show_pathway?ath04130/ath:AT3G11820%09red/ath:AT1G16240%09red
Plant-pathogen interaction	KEGG PATHWAY	ath04626	5	167	0.300503	0.610253	CDS_27054_Unigene_42080|CDS_419_Unigene_913|CDS_10449_Unigene_18617|CDS_25625_Unigene_40122|CDS_12714_Unigene_22024	http://www.genome.jp/kegg-bin/show_pathway?ath04626/ath:AT3G07040%09red/ath:AT4G26470%09red/ath:AT4G23650%09red/ath:AT5G20480%09red/ath:AT4G04720%09red
DNA replication	KEGG PATHWAY	ath03030	2	50	0.301698	0.610253	CDS_30408_Unigene_46771|CDS_11981_Unigene_20934	http://www.genome.jp/kegg-bin/show_pathway?ath03030/ath:AT2G06510%09red/ath:AT5G08020%09red
Arachidonic acid metabolism	KEGG PATHWAY	ath00590	1	17	0.319738	0.619473	CDS_30554_Unigene_46970	http://www.genome.jp/kegg-bin/show_pathway?ath00590/ath:AT5G13520%09red
Biosynthesis of amino acids	KEGG PATHWAY	ath01230	7	255	0.320177	0.619473	CDS_19490_Unigene_31671|CDS_2129_Unigene_4567|CDS_656_Unigene_1477|CDS_1997_Unigene_4288|CDS_3613_Unigene_7301|CDS_14419_Unigene_24449|CDS_10496_Unigene_18690	http://www.genome.jp/kegg-bin/show_pathway?ath01230/ath:AT1G48850%09red/ath:AT2G01140%09red/ath:AT2G45440%09red/ath:AT3G55610%09red/ath:AT3G59890%09red/ath:AT3G55440%09red/ath:AT1G72330%09red
Glutathione metabolism	KEGG PATHWAY	ath00480	3	93	0.332171	0.629005	CDS_1478_Unigene_3399|CDS_24526_Unigene_38550|CDS_16360_Unigene_27276	http://www.genome.jp/kegg-bin/show_pathway?ath00480/ath:AT1G65820%09red/ath:AT3G27060%09red/ath:AT4G32320%09red
Basal transcription factors	KEGG PATHWAY	ath03022	2	55	0.340658	0.631637	CDS_26046_Unigene_40705|CDS_28018_Unigene_43417	http://www.genome.jp/kegg-bin/show_pathway?ath03022/ath:AT1G73960%09red/ath:AT1G17440%09red
Glucosinolate biosynthesis	KEGG PATHWAY	ath00966	1	19	0.348255	0.632544	CDS_27423_Unigene_42576	http://www.genome.jp/kegg-bin/show_pathway?ath00966/ath:AT1G24100%09red
Pentose phosphate pathway	KEGG PATHWAY	ath00030	2	58	0.363714	0.640812	CDS_2129_Unigene_4567|CDS_21634_Unigene_34611	http://www.genome.jp/kegg-bin/show_pathway?ath00030/ath:AT2G01140%09red/ath:AT1G13700%09red
Ubiquitin mediated proteolysis	KEGG PATHWAY	ath04120	4	142	0.373372	0.640812	CDS_32070_Unigene_49050|CDS_20234_Unigene_32641|CDS_545_Unigene_1187|CDS_1126_Unigene_2422	http://www.genome.jp/kegg-bin/show_pathway?ath04120/ath:AT4G02570%09red/ath:AT5G05560%09red/ath:AT3G17000%09red/ath:AT4G21530%09red
Flavonoid biosynthesis	KEGG PATHWAY	ath00941	1	21	0.375578	0.640812	CDS_1047_Unigene_2281	http://www.genome.jp/kegg-bin/show_pathway?ath00941/ath:AT1G61720%09red
Biosynthesis of secondary metabolites	KEGG PATHWAY	ath01110	25	1076	0.388303	0.640812	CDS_30241_Unigene_46513|CDS_19490_Unigene_31671|CDS_1047_Unigene_2281|CDS_6564_Unigene_12532|CDS_13123_Unigene_22628|CDS_656_Unigene_1477|CDS_27423_Unigene_42576|CDS_6093_Unigene_11849|CDS_25587_Unigene_40060|CDS_28193_Unigene_43668|CDS_1620_Unigene_3624|CDS_21634_Unigene_34611|CDS_14919_Unigene_25206|CDS_7356_Unigene_13908|CDS_14419_Unigene_24449|CDS_20384_Unigene_32840|CDS_5087_Unigene_9840|CDS…	http://www.genome.jp/kegg-bin/show_pathway?ath01110/ath:AT5G65750%09red/ath:AT3G15730%09red/ath:AT3G55610%09red/ath:AT2G07050%09red/ath:AT3G03480%09red/ath:AT2G01140%09red/ath:AT1G13700%09red/ath:AT4G12290%09red/ath:AT4G20960%09red/ath:AT3G59890%09red/ath:AT1G60550%09red/ath:AT2G24190%09red/ath:AT1G61720%09red/ath:AT3G55440%09red/ath:AT4G34890%09red/ath:AT5G25180%09red/ath:AT4G37760%09red/ath:AT1…
Diterpenoid biosynthesis	KEGG PATHWAY	ath00904	1	22	0.388807	0.640812	CDS_25587_Unigene_40060	http://www.genome.jp/kegg-bin/show_pathway?ath00904/ath:AT1G15550%09red
Isoquinoline alkaloid biosynthesis	KEGG PATHWAY	ath00950	1	23	0.401757	0.650116	CDS_14919_Unigene_25206	http://www.genome.jp/kegg-bin/show_pathway?ath00950/ath:AT4G12290%09red
Phosphatidylinositol signaling system	KEGG PATHWAY	ath04070	2	68	0.438039	0.691859	CDS_33775_Unigene_51376|CDS_3515_Unigene_7058	http://www.genome.jp/kegg-bin/show_pathway?ath04070/ath:AT1G22100%09red/ath:AT1G49340%09red
Nucleotide excision repair	KEGG PATHWAY	ath03420	2	69	0.445217	0.691859	CDS_30408_Unigene_46771|CDS_11981_Unigene_20934	http://www.genome.jp/kegg-bin/show_pathway?ath03420/ath:AT2G06510%09red/ath:AT5G08020%09red
Ether lipid metabolism	KEGG PATHWAY	ath00565	1	27	0.450875	0.691859	CDS_8217_Unigene_15271	http://www.genome.jp/kegg-bin/show_pathway?ath00565/ath:AT3G15730%09red
Regulation of autophagy	KEGG PATHWAY	ath04140	1	28	0.462511	0.697687	CDS_29927_Unigene_46082	http://www.genome.jp/kegg-bin/show_pathway?ath04140/ath:AT3G01090%09red
Glyoxylate and dicarboxylate metabolism	KEGG PATHWAY	ath00630	2	74	0.480313	0.700785	CDS_13074_Unigene_22561|CDS_13123_Unigene_22628	http://www.genome.jp/kegg-bin/show_pathway?ath00630/ath:AT2G13360%09red/ath:AT2G26080%09red
2-Oxocarboxylic acid metabolism	KEGG PATHWAY	ath01210	2	74	0.480313	0.700785	CDS_1997_Unigene_4288|CDS_27423_Unigene_42576	http://www.genome.jp/kegg-bin/show_pathway?ath01210/ath:AT1G24100%09red/ath:AT1G72330%09red
Ubiquinone and other terpenoid-quinone biosynthesis	KEGG PATHWAY	ath00130	1	35	0.537359	0.737845	CDS_5087_Unigene_9840	http://www.genome.jp/kegg-bin/show_pathway?ath00130/ath:AT1G60550%09red
Fatty acid elongation	KEGG PATHWAY	ath00062	1	35	0.537359	0.737845	CDS_5362_Unigene_10378	http://www.genome.jp/kegg-bin/show_pathway?ath00062/ath:AT2G28630%09red
Arginine biosynthesis	KEGG PATHWAY	ath00220	1	35	0.537359	0.737845	CDS_1997_Unigene_4288	http://www.genome.jp/kegg-bin/show_pathway?ath00220/ath:AT1G72330%09red
alpha-Linolenic acid metabolism	KEGG PATHWAY	ath00592	1	36	0.547166	0.737845	CDS_6564_Unigene_12532	http://www.genome.jp/kegg-bin/show_pathway?ath00592/ath:AT3G03480%09red
Tropane, piperidine and pyridine alkaloid biosynthesis	KEGG PATHWAY	ath00960	1	36	0.547166	0.737845	CDS_14919_Unigene_25206	http://www.genome.jp/kegg-bin/show_pathway?ath00960/ath:AT4G12290%09red
Glycerophospholipid metabolism	KEGG PATHWAY	ath00564	2	86	0.558701	0.739277	CDS_8217_Unigene_15271|CDS_6724_Unigene_12776	http://www.genome.jp/kegg-bin/show_pathway?ath00564/ath:AT4G15130%09red/ath:AT3G15730%09red
Peroxisome	KEGG PATHWAY	ath04146	2	87	0.564841	0.739277	CDS_13074_Unigene_22561|CDS_28193_Unigene_43668	http://www.genome.jp/kegg-bin/show_pathway?ath04146/ath:AT2G13360%09red/ath:AT4G34890%09red
Tyrosine metabolism	KEGG PATHWAY	ath00350	1	40	0.584362	0.753742	CDS_14919_Unigene_25206	http://www.genome.jp/kegg-bin/show_pathway?ath00350/ath:AT4G12290%09red
Phenylalanine metabolism	KEGG PATHWAY	ath00360	1	42	0.601799	0.765145	CDS_14919_Unigene_25206	http://www.genome.jp/kegg-bin/show_pathway?ath00360/ath:AT4G12290%09red
Limonene and pinene degradation	KEGG PATHWAY	ath00903	1	44	0.618507	0.775311	CDS_1620_Unigene_3624	http://www.genome.jp/kegg-bin/show_pathway?ath00903/ath:AT5G25180%09red
Stilbenoid, diarylheptanoid and gingerol biosynthesis	KEGG PATHWAY	ath00945	1	46	0.634514	0.78433	CDS_1620_Unigene_3624	http://www.genome.jp/kegg-bin/show_pathway?ath00945/ath:AT5G25180%09red
Purine metabolism	KEGG PATHWAY	ath00230	3	158	0.665556	0.811431	CDS_28193_Unigene_43668|CDS_8521_Unigene_15773|CDS_16360_Unigene_27276	http://www.genome.jp/kegg-bin/show_pathway?ath00230/ath:AT4G04955%09red/ath:AT3G27060%09red/ath:AT4G34890%09red
Protein export	KEGG PATHWAY	ath03060	1	53	0.685441	0.821595	CDS_20699_Unigene_33308	http://www.genome.jp/kegg-bin/show_pathway?ath03060/ath:AT2G39960%09red
Cysteine and methionine metabolism	KEGG PATHWAY	ath00270	2	112	0.698351	0.821595	CDS_10317_Unigene_18434|CDS_2458_Unigene_5174	http://www.genome.jp/kegg-bin/show_pathway?ath00270/ath:AT5G27650%09red/ath:AT1G49820%09red
Phenylalanine, tyrosine and tryptophan biosynthesis	KEGG PATHWAY	ath00400	1	57	0.711294	0.821595	CDS_656_Unigene_1477	http://www.genome.jp/kegg-bin/show_pathway?ath00400/ath:AT1G48850%09red
Terpenoid backbone biosynthesis	KEGG PATHWAY	ath00900	1	58	0.717418	0.821595	CDS_1733_Unigene_3783	http://www.genome.jp/kegg-bin/show_pathway?ath00900/ath:AT4G33360%09red
Glycolysis / Gluconeogenesis	KEGG PATHWAY	ath00010	2	117	0.720579	0.821595	CDS_19490_Unigene_31671|CDS_2129_Unigene_4567	http://www.genome.jp/kegg-bin/show_pathway?ath00010/ath:AT2G01140%09red/ath:AT3G55440%09red
Cyanoamino acid metabolism	KEGG PATHWAY	ath00460	1	60	0.729281	0.821595	CDS_5201_Unigene_10054	http://www.genome.jp/kegg-bin/show_pathway?ath00460/ath:AT5G20950%09red
Citrate cycle (TCA cycle)	KEGG PATHWAY	ath00020	1	63	0.74615	0.830092	CDS_18021_Unigene_29592	http://www.genome.jp/kegg-bin/show_pathway?ath00020/ath:AT5G65750%09red
Photosynthesis	KEGG PATHWAY	ath00195	1	77	0.812006	0.892204	CDS_31058_Unigene_47710	http://www.genome.jp/kegg-bin/show_pathway?ath00195/ath:AT5G45040%09red
Plant hormone signal transduction	KEGG PATHWAY	ath04075	4	271	0.836453	0.893104	CDS_11064_Unigene_19503|CDS_12413_Unigene_21581|CDS_17977_Unigene_29519|CDS_4743_Unigene_9199	http://www.genome.jp/kegg-bin/show_pathway?ath04075/ath:AT5G25350%09red/ath:AT1G19850%09red/ath:AT1G14920%09red/ath:AT1G64280%09red
Pyruvate metabolism	KEGG PATHWAY	ath00620	1	85	0.841663	0.893104	CDS_14486_Unigene_24550	http://www.genome.jp/kegg-bin/show_pathway?ath00620/ath:AT4G00570%09red
Phagosome	KEGG PATHWAY	ath04145	1	86	0.845025	0.893104	CDS_16061_Unigene_26886	http://www.genome.jp/kegg-bin/show_pathway?ath04145/ath:AT1G08450%09red
Phenylpropanoid biosynthesis	KEGG PATHWAY	ath00940	2	157	0.852964	0.893104	CDS_4236_Unigene_8318|CDS_5201_Unigene_10054	http://www.genome.jp/kegg-bin/show_pathway?ath00940/ath:AT3G24503%09red/ath:AT5G20950%09red
Pyrimidine metabolism	KEGG PATHWAY	ath00240	1	116	0.918633	0.950678	CDS_16360_Unigene_27276	http://www.genome.jp/kegg-bin/show_pathway?ath00240/ath:AT3G27060%09red
Ribosome	KEGG PATHWAY	ath03010	4	363	0.953203	0.975115	CDS_7361_Unigene_13916|CDS_8133_Unigene_15146|CDS_5175_Unigene_9992|CDS_1095_Unigene_2362	http://www.genome.jp/kegg-bin/show_pathway?ath03010/ath:AT3G09200%09red/ath:AT5G35530%09red/ath:AT4G27090%09red/ath:AT3G04770%09red
Oxidative phosphorylation	KEGG PATHWAY	ath00190	1	162	0.969744	0.980763	CDS_12445_Unigene_21626	http://www.genome.jp/kegg-bin/show_pathway?ath00190/ath:AT1G22450%09red
Spliceosome	KEGG PATHWAY	ath03040	1	192	0.984142	0.984142	CDS_9596_Unigene_17404	http://www.genome.jp/kegg-bin/show_pathway?ath03040/ath:AT2G13540%09red

## Sheet: SALT Up-regulated
#Term	Database	ID	Input number	Background number	P-Value	Corrected P-Value	Input	Hyperlink
Carbon metabolism	KEGG PATHWAY	ath01200	12	262	0.000287687	0.0107188	CDS_9973_Unigene_17031|CDS_21001_Unigene_33595|CDS_15190_Unigene_24921|CDS_4114_Unigene_7584|CDS_10196_Unigene_17365|CDS_20457_Unigene_32790|CDS_20458_Unigene_32791|CDS_10956_Unigene_18472|CDS_1280_Unigene_2516|CDS_15077_Unigene_24743|CDS_5455_Unigene_9735|CDS_19113_Unigene_30860	http://www.genome.jp/kegg-bin/show_pathway?ath01200/ath:AT2G24270%09red/ath:AT2G05710%09red/ath:AT5G50850%09red/ath:AT3G15020%09red/ath:AT1G53310%09red/ath:AT5G56760%09red/ath:AT1G53240%09red/ath:AT1G17745%09red/ath:AT3G54050%09red/ath:AT5G44520%09red/ath:AT4G38970%09red/ath:AT5G35790%09red
Spliceosome	KEGG PATHWAY	ath03040	10	192	0.000350803	0.0107188	CDS_25727_Unigene_41542|CDS_3172_Unigene_5948|CDS_8348_Unigene_14545|CDS_948_Unigene_1898|CDS_27314_Unigene_45091|CDS_13457_Unigene_22250|CDS_132_Unigene_271|CDS_26257_Unigene_42753|CDS_20384_Unigene_32683|CDS_12141_Unigene_20219	http://www.genome.jp/kegg-bin/show_pathway?ath03040/ath:AT3G01540%09red/ath:AT5G10370%09red/ath:AT4G24280%09red/ath:AT1G04510%09red/ath:AT3G12580%09red/ath:AT2G33440%09red/ath:AT1G27900%09red/ath:AT5G37370%09red/ath:AT1G80070%09red/ath:AT1G03140%09red
Carbon fixation in photosynthetic organisms	KEGG PATHWAY	ath00710	6	69	0.000452908	0.0107188	CDS_9973_Unigene_17031|CDS_10196_Unigene_17365|CDS_20457_Unigene_32790|CDS_20458_Unigene_32791|CDS_10956_Unigene_18472|CDS_15077_Unigene_24743	http://www.genome.jp/kegg-bin/show_pathway?ath00710/ath:AT1G53310%09red/ath:AT3G15020%09red/ath:AT1G53240%09red/ath:AT3G54050%09red/ath:AT5G44520%09red/ath:AT4G38970%09red
Pentose phosphate pathway	KEGG PATHWAY	ath00030	5	58	0.00140649	0.0249651	CDS_10956_Unigene_18472|CDS_15077_Unigene_24743|CDS_5455_Unigene_9735|CDS_19113_Unigene_30860|CDS_10196_Unigene_17365	http://www.genome.jp/kegg-bin/show_pathway?ath00030/ath:AT2G24270%09red/ath:AT3G54050%09red/ath:AT5G44520%09red/ath:AT4G38970%09red/ath:AT5G35790%09red
Cysteine and methionine metabolism	KEGG PATHWAY	ath00270	6	112	0.00464551	0.0659663	CDS_21001_Unigene_33595|CDS_8284_Unigene_14448|CDS_10907_Unigene_18391|CDS_20458_Unigene_32791|CDS_20457_Unigene_32790|CDS_27423_Unigene_45232	http://www.genome.jp/kegg-bin/show_pathway?ath00270/ath:AT3G02470%09red/ath:AT3G22740%09red/ath:AT5G43850%09red/ath:AT5G56760%09red/ath:AT1G53240%09red/ath:AT3G15020%09red
Glycolysis / Gluconeogenesis	KEGG PATHWAY	ath00010	6	117	0.00567605	0.0670457	CDS_10320_Unigene_17524|CDS_10956_Unigene_18472|CDS_1280_Unigene_2516|CDS_15077_Unigene_24743|CDS_3542_Unigene_6531|CDS_19113_Unigene_30860	http://www.genome.jp/kegg-bin/show_pathway?ath00010/ath:AT2G24270%09red/ath:AT4G36250%09red/ath:AT5G50850%09red/ath:AT1G77120%09red/ath:AT3G54050%09red/ath:AT4G38970%09red
Pyruvate metabolism	KEGG PATHWAY	ath00620	5	85	0.00661014	0.0670457	CDS_10320_Unigene_17524|CDS_9973_Unigene_17031|CDS_20457_Unigene_32790|CDS_20458_Unigene_32791|CDS_1280_Unigene_2516	http://www.genome.jp/kegg-bin/show_pathway?ath00620/ath:AT5G50850%09red/ath:AT1G53310%09red/ath:AT3G15020%09red/ath:AT4G36250%09red/ath:AT1G53240%09red
Protein processing in endoplasmic reticulum	KEGG PATHWAY	ath04141	8	212	0.00869761	0.0771913	CDS_3172_Unigene_5948|CDS_349_Unigene_659|CDS_12886_Unigene_21371|CDS_21277_Unigene_34008|CDS_26257_Unigene_42753|CDS_15993_Unigene_26180|CDS_15731_Unigene_25754|CDS_21210_Unigene_33902	http://www.genome.jp/kegg-bin/show_pathway?ath04141/ath:AT5G03340%09red/ath:AT4G24280%09red/ath:AT1G77510%09red/ath:AT3G53800%09red/ath:AT5G50430%09red/ath:AT3G16090%09red/ath:AT3G12580%09red/ath:AT1G30000%09red
Citrate cycle (TCA cycle)	KEGG PATHWAY	ath00020	4	63	0.0115612	0.0912051	CDS_20457_Unigene_32790|CDS_15190_Unigene_24921|CDS_20458_Unigene_32791|CDS_1280_Unigene_2516	http://www.genome.jp/kegg-bin/show_pathway?ath00020/ath:AT5G50850%09red/ath:AT2G05710%09red/ath:AT3G15020%09red/ath:AT1G53240%09red
Arginine and proline metabolism	KEGG PATHWAY	ath00330	3	53	0.0369723	0.262504	CDS_10320_Unigene_17524|CDS_10907_Unigene_18391|CDS_12079_Unigene_20140	http://www.genome.jp/kegg-bin/show_pathway?ath00330/ath:AT3G02470%09red/ath:AT5G14800%09red/ath:AT4G36250%09red
Endocytosis	KEGG PATHWAY	ath04144	5	142	0.0443661	0.286363	CDS_3172_Unigene_5948|CDS_20617_Unigene_33024|CDS_26257_Unigene_42753|CDS_20468_Unigene_32799|CDS_10848_Unigene_18299	http://www.genome.jp/kegg-bin/show_pathway?ath04144/ath:AT3G07940%09red/ath:AT3G12580%09red/ath:AT5G11710%09red/ath:AT4G24280%09red/ath:AT5G13860%09red
Biosynthesis of secondary metabolites	KEGG PATHWAY	ath01110	21	1076	0.0537498	0.296013	CDS_20457_Unigene_32790|CDS_6000_Unigene_10687|CDS_15190_Unigene_24921|CDS_9041_Unigene_15589|CDS_10196_Unigene_17365|CDS_27346_Unigene_45127|CDS_8284_Unigene_14448|CDS_10320_Unigene_17524|CDS_12079_Unigene_20140|CDS_21001_Unigene_33595|CDS_20458_Unigene_32791|CDS_23281_Unigene_37043|CDS_10956_Unigene_18472|CDS_17851_Unigene_28968|CDS_27281_Unigene_45058|CDS_1280_Unigene_2516|CDS_22927_Unigene_36…	http://www.genome.jp/kegg-bin/show_pathway?ath01110/ath:AT5G35790%09red/ath:AT2G05710%09red/ath:AT3G22740%09red/ath:AT4G36250%09red/ath:AT5G07990%09red/ath:AT2G17570%09red/ath:AT2G42490%09red/ath:AT2G44520%09red/ath:AT4G33420%09red/ath:AT3G15020%09red/ath:AT4G14930%09red/ath:AT1G02205%09red/ath:AT5G14800%09red/ath:AT5G50850%09red/ath:AT3G48560%09red/ath:AT1G53240%09red/ath:AT1G77120%09red/ath:AT3…
Biosynthesis of amino acids	KEGG PATHWAY	ath01230	7	255	0.05769	0.296013	CDS_21001_Unigene_33595|CDS_15190_Unigene_24921|CDS_10196_Unigene_17365|CDS_23281_Unigene_37043|CDS_12079_Unigene_20140|CDS_10956_Unigene_18472|CDS_4114_Unigene_7584	http://www.genome.jp/kegg-bin/show_pathway?ath01230/ath:AT2G05710%09red/ath:AT3G48560%09red/ath:AT5G14800%09red/ath:AT5G56760%09red/ath:AT1G17745%09red/ath:AT5G44520%09red/ath:AT4G38970%09red
Cutin, suberine and wax biosynthesis	KEGG PATHWAY	ath00073	2	28	0.0583688	0.296013	CDS_3232_Unigene_6027|CDS_17851_Unigene_28968	http://www.genome.jp/kegg-bin/show_pathway?ath00073/ath:AT5G41040%09red/ath:AT1G02205%09red
Metabolic pathways	KEGG PATHWAY	ath01100	33	1910	0.0751349	0.33476	CDS_9973_Unigene_17031|CDS_12079_Unigene_20140|CDS_8284_Unigene_14448|CDS_20457_Unigene_32790|CDS_9854_Unigene_16833|CDS_6000_Unigene_10687|CDS_15479_Unigene_25327|CDS_23281_Unigene_37043|CDS_10320_Unigene_17524|CDS_25286_Unigene_40492|CDS_12522_Unigene_20786|CDS_255_Unigene_481|CDS_19113_Unigene_30860|CDS_27281_Unigene_45058|CDS_15077_Unigene_24743|CDS_15190_Unigene_24921|CDS_20928_Unigene_33496…	http://www.genome.jp/kegg-bin/show_pathway?ath01100/ath:AT2G24270%09red/ath:AT4G36250%09red/ath:AT3G55260%09red/ath:AT5G50850%09red/ath:AT2G44520%09red/ath:AT4G33420%09red/ath:AT4G02280%09red/ath:AT1G30000%09red/ath:AT1G53000%09red/ath:AT1G53240%09red/ath:AT5G35790%09red/ath:AT2G05710%09red/ath:AT4G04640%09red/ath:AT3G48560%09red/ath:AT5G43850%09red/ath:AT1G77120%09red/ath:AT5G07990%09red/ath:AT1…
Glycosphingolipid biosynthesis - ganglio series	KEGG PATHWAY	ath00604	1	5	0.0759666	0.33476	CDS_20928_Unigene_33496	http://www.genome.jp/kegg-bin/show_pathway?ath00604/ath:AT3G55260%09red
Glyoxylate and dicarboxylate metabolism	KEGG PATHWAY	ath00630	3	74	0.0801538	0.33476	CDS_20457_Unigene_32790|CDS_15190_Unigene_24921|CDS_20458_Unigene_32791	http://www.genome.jp/kegg-bin/show_pathway?ath00630/ath:AT1G53240%09red/ath:AT2G05710%09red/ath:AT3G15020%09red
Glycosaminoglycan degradation	KEGG PATHWAY	ath00531	1	7	0.0999874	0.341965	CDS_20928_Unigene_33496	http://www.genome.jp/kegg-bin/show_pathway?ath00531/ath:AT3G55260%09red
Tyrosine metabolism	KEGG PATHWAY	ath00350	2	40	0.104466	0.341965	CDS_22927_Unigene_36473|CDS_3542_Unigene_6531	http://www.genome.jp/kegg-bin/show_pathway?ath00350/ath:AT2G42490%09red/ath:AT1G77120%09red
beta-Alanine metabolism	KEGG PATHWAY	ath00410	2	40	0.104466	0.341965	CDS_22927_Unigene_36473|CDS_10320_Unigene_17524	http://www.genome.jp/kegg-bin/show_pathway?ath00410/ath:AT2G42490%09red/ath:AT4G36250%09red
Fatty acid degradation	KEGG PATHWAY	ath00071	2	41	0.108654	0.341965	CDS_10320_Unigene_17524|CDS_3542_Unigene_6531	http://www.genome.jp/kegg-bin/show_pathway?ath00071/ath:AT1G77120%09red/ath:AT4G36250%09red
Ascorbate and aldarate metabolism	KEGG PATHWAY	ath00053	2	41	0.108654	0.341965	CDS_10320_Unigene_17524|CDS_15479_Unigene_25327	http://www.genome.jp/kegg-bin/show_pathway?ath00053/ath:AT1G55570%09red/ath:AT4G36250%09red
Non-homologous end-joining	KEGG PATHWAY	ath03450	1	8	0.111763	0.341965	CDS_7204_Unigene_12833	http://www.genome.jp/kegg-bin/show_pathway?ath03450/ath:AT5G26680%09red
N-Glycan biosynthesis	KEGG PATHWAY	ath00510	2	44	0.121473	0.341965	CDS_23152_Unigene_36840|CDS_21210_Unigene_33902	http://www.genome.jp/kegg-bin/show_pathway?ath00510/ath:AT1G30000%09red/ath:AT4G38240%09red
Glycosphingolipid biosynthesis - globo series	KEGG PATHWAY	ath00603	1	9	0.123386	0.341965	CDS_20928_Unigene_33496	http://www.genome.jp/kegg-bin/show_pathway?ath00603/ath:AT3G55260%09red
Ubiquitin mediated proteolysis	KEGG PATHWAY	ath04120	4	142	0.125227	0.341965	CDS_349_Unigene_659|CDS_948_Unigene_1898|CDS_21277_Unigene_34008|CDS_11373_Unigene_19063	http://www.genome.jp/kegg-bin/show_pathway?ath04120/ath:AT1G04510%09red/ath:AT2G32950%09red/ath:AT3G16090%09red/ath:AT5G50430%09red
C5-Branched dibasic acid metabolism	KEGG PATHWAY	ath00660	1	10	0.134856	0.345427	CDS_23281_Unigene_37043	http://www.genome.jp/kegg-bin/show_pathway?ath00660/ath:AT3G48560%09red
Starch and sucrose metabolism	KEGG PATHWAY	ath00500	5	202	0.136225	0.345427	CDS_25303_Unigene_40524|CDS_16014_Unigene_26207|CDS_25286_Unigene_40492|CDS_18348_Unigene_29686|CDS_12726_Unigene_21094	http://www.genome.jp/kegg-bin/show_pathway?ath00500/ath:AT2G01630%09red/ath:AT4G17090%09red/ath:AT4G02280%09red/ath:AT5G11720%09red/ath:AT2G20810%09red
Plant hormone signal transduction	KEGG PATHWAY	ath04075	6	271	0.156864	0.384047	CDS_5454_Unigene_9734|CDS_3938_Unigene_7254|CDS_17511_Unigene_28448|CDS_20281_Unigene_32519|CDS_20190_Unigene_32383|CDS_2661_Unigene_5133	http://www.genome.jp/kegg-bin/show_pathway?ath04075/ath:AT2G25490%09red/ath:AT5G57050%09red/ath:AT3G04730%09red/ath:AT1G72770%09red/ath:AT2G33860%09red/ath:AT3G16360%09red
Galactose metabolism	KEGG PATHWAY	ath00052	2	55	0.171095	0.397328	CDS_25303_Unigene_40524|CDS_1111_Unigene_2166	http://www.genome.jp/kegg-bin/show_pathway?ath00052/ath:AT5G20250%09red/ath:AT5G11720%09red
Oxidative phosphorylation	KEGG PATHWAY	ath00190	4	162	0.173481	0.397328	CDS_23677_Unigene_37645|CDS_12522_Unigene_20786|CDS_27281_Unigene_45058|CDS_1778_Unigene_3600	http://www.genome.jp/kegg-bin/show_pathway?ath00190/ath:AT1G15690%09red/ath:AT2G44520%09red/ath:AT4G04640%09red/ath:AT4G30190%09red
Plant-pathogen interaction	KEGG PATHWAY	ath04626	4	167	0.186433	0.413647	CDS_26744_Unigene_43881|CDS_1071_Unigene_2111|CDS_21799_Unigene_34834|CDS_20854_Unigene_33370	http://www.genome.jp/kegg-bin/show_pathway?ath04626/ath:AT5G13160%09red/ath:AT5G15410%09red/ath:AT3G48080%09red/ath:AT5G53130%09red
Nicotinate and nicotinamide metabolism	KEGG PATHWAY	ath00760	1	16	0.200603	0.424834	CDS_6000_Unigene_10687	http://www.genome.jp/kegg-bin/show_pathway?ath00760/ath:AT4G14930%09red
Butanoate metabolism	KEGG PATHWAY	ath00650	1	17	0.211066	0.424834	CDS_23281_Unigene_37043	http://www.genome.jp/kegg-bin/show_pathway?ath00650/ath:AT3G48560%09red
Fructose and mannose metabolism	KEGG PATHWAY	ath00051	2	64	0.213721	0.424834	CDS_10956_Unigene_18472|CDS_15077_Unigene_24743	http://www.genome.jp/kegg-bin/show_pathway?ath00051/ath:AT3G54050%09red/ath:AT4G38970%09red
Histidine metabolism	KEGG PATHWAY	ath00340	1	18	0.221392	0.424834	CDS_10320_Unigene_17524	http://www.genome.jp/kegg-bin/show_pathway?ath00340/ath:AT4G36250%09red
Other glycan degradation	KEGG PATHWAY	ath00511	1	18	0.221392	0.424834	CDS_20928_Unigene_33496	http://www.genome.jp/kegg-bin/show_pathway?ath00511/ath:AT3G55260%09red
Flavonoid biosynthesis	KEGG PATHWAY	ath00941	1	21	0.251569	0.45818	CDS_9854_Unigene_16833	http://www.genome.jp/kegg-bin/show_pathway?ath00941/ath:AT5G07990%09red
Glycine, serine and threonine metabolism	KEGG PATHWAY	ath00260	2	72	0.252345	0.45818	CDS_22927_Unigene_36473|CDS_4114_Unigene_7584	http://www.genome.jp/kegg-bin/show_pathway?ath00260/ath:AT2G42490%09red/ath:AT1G17745%09red
2-Oxocarboxylic acid metabolism	KEGG PATHWAY	ath01210	2	74	0.262044	0.45818	CDS_15190_Unigene_24921|CDS_23281_Unigene_37043	http://www.genome.jp/kegg-bin/show_pathway?ath01210/ath:AT2G05710%09red/ath:AT3G48560%09red
Valine, leucine and isoleucine biosynthesis	KEGG PATHWAY	ath00290	1	23	0.271036	0.45818	CDS_23281_Unigene_37043	http://www.genome.jp/kegg-bin/show_pathway?ath00290/ath:AT3G48560%09red
Isoquinoline alkaloid biosynthesis	KEGG PATHWAY	ath00950	1	23	0.271036	0.45818	CDS_22927_Unigene_36473	http://www.genome.jp/kegg-bin/show_pathway?ath00950/ath:AT2G42490%09red
Pentose and glucuronate interconversions	KEGG PATHWAY	ath00040	2	81	0.295962	0.472219	CDS_10320_Unigene_17524|CDS_23839_Unigene_37894	http://www.genome.jp/kegg-bin/show_pathway?ath00040/ath:AT5G04310%09red/ath:AT4G36250%09red
ABC transporters	KEGG PATHWAY	ath02010	1	26	0.299294	0.472219	CDS_25399_Unigene_40652	http://www.genome.jp/kegg-bin/show_pathway?ath02010/ath:AT3G28345%09red
Lysine degradation	KEGG PATHWAY	ath00310	1	26	0.299294	0.472219	CDS_10320_Unigene_17524	http://www.genome.jp/kegg-bin/show_pathway?ath00310/ath:AT4G36250%09red
Pantothenate and CoA biosynthesis	KEGG PATHWAY	ath00770	1	28	0.317523	0.483494	CDS_23281_Unigene_37043	http://www.genome.jp/kegg-bin/show_pathway?ath00770/ath:AT3G48560%09red
Phagosome	KEGG PATHWAY	ath04145	2	86	0.320059	0.483494	CDS_23365_Unigene_37176|CDS_13397_Unigene_22154	http://www.genome.jp/kegg-bin/show_pathway?ath04145/ath:AT4G14960%09red/ath:AT1G75780%09red
Glutathione metabolism	KEGG PATHWAY	ath00480	2	93	0.353436	0.522791	CDS_18872_Unigene_30488|CDS_5455_Unigene_9735	http://www.genome.jp/kegg-bin/show_pathway?ath00480/ath:AT2G29420%09red/ath:AT5G35790%09red
Circadian rhythm - plant	KEGG PATHWAY	ath04712	1	36	0.38583	0.537136	CDS_11373_Unigene_19063	http://www.genome.jp/kegg-bin/show_pathway?ath04712/ath:AT2G32950%09red
alpha-Linolenic acid metabolism	KEGG PATHWAY	ath00592	1	36	0.38583	0.537136	CDS_3542_Unigene_6531	http://www.genome.jp/kegg-bin/show_pathway?ath00592/ath:AT1G77120%09red
Tropane, piperidine and pyridine alkaloid biosynthesis	KEGG PATHWAY	ath00960	1	36	0.38583	0.537136	CDS_22927_Unigene_36473	http://www.genome.jp/kegg-bin/show_pathway?ath00960/ath:AT2G42490%09red
Sulfur metabolism	KEGG PATHWAY	ath00920	1	41	0.425014	0.577446	CDS_21001_Unigene_33595	http://www.genome.jp/kegg-bin/show_pathway?ath00920/ath:AT5G56760%09red
Phenylalanine metabolism	KEGG PATHWAY	ath00360	1	42	0.432547	0.577446	CDS_22927_Unigene_36473	http://www.genome.jp/kegg-bin/show_pathway?ath00360/ath:AT2G42490%09red
Base excision repair	KEGG PATHWAY	ath03410	1	43	0.439981	0.577446	CDS_7204_Unigene_12833	http://www.genome.jp/kegg-bin/show_pathway?ath03410/ath:AT5G26680%09red
Limonene and pinene degradation	KEGG PATHWAY	ath00903	1	44	0.447317	0.577446	CDS_10320_Unigene_17524	http://www.genome.jp/kegg-bin/show_pathway?ath00903/ath:AT4G36250%09red
Tryptophan metabolism	KEGG PATHWAY	ath00380	1	46	0.461705	0.582345	CDS_10320_Unigene_17524	http://www.genome.jp/kegg-bin/show_pathway?ath00380/ath:AT4G36250%09red
Valine, leucine and isoleucine degradation	KEGG PATHWAY	ath00280	1	48	0.475719	0.582345	CDS_10320_Unigene_17524	http://www.genome.jp/kegg-bin/show_pathway?ath00280/ath:AT4G36250%09red
Porphyrin and chlorophyll metabolism	KEGG PATHWAY	ath00860	1	48	0.475719	0.582345	CDS_27281_Unigene_45058	http://www.genome.jp/kegg-bin/show_pathway?ath00860/ath:AT2G44520%09red
DNA replication	KEGG PATHWAY	ath03030	1	50	0.489369	0.588901	CDS_7204_Unigene_12833	http://www.genome.jp/kegg-bin/show_pathway?ath03030/ath:AT5G26680%09red
Protein export	KEGG PATHWAY	ath03060	1	53	0.509182	0.592654	CDS_15343_Unigene_25125	http://www.genome.jp/kegg-bin/show_pathway?ath03060/ath:AT2G01110%09red
Glycerolipid metabolism	KEGG PATHWAY	ath00561	1	53	0.509182	0.592654	CDS_10320_Unigene_17524	http://www.genome.jp/kegg-bin/show_pathway?ath00561/ath:AT4G36250%09red
Amino sugar and nucleotide sugar metabolism	KEGG PATHWAY	ath00520	2	135	0.536916	0.599634	CDS_12726_Unigene_21094|CDS_20928_Unigene_33496	http://www.genome.jp/kegg-bin/show_pathway?ath00520/ath:AT2G20810%09red/ath:AT3G55260%09red
Terpenoid backbone biosynthesis	KEGG PATHWAY	ath00900	1	58	0.540515	0.599634	CDS_9041_Unigene_15589	http://www.genome.jp/kegg-bin/show_pathway?ath00900/ath:AT2G17570%09red
Proteasome	KEGG PATHWAY	ath03050	1	58	0.540515	0.599634	CDS_12879_Unigene_21355	http://www.genome.jp/kegg-bin/show_pathway?ath03050/ath:AT2G20580%09red
Photosynthesis	KEGG PATHWAY	ath00195	1	77	0.642433	0.701734	CDS_12522_Unigene_20786	http://www.genome.jp/kegg-bin/show_pathway?ath00195/ath:AT4G04640%09red
RNA transport	KEGG PATHWAY	ath03013	2	169	0.657147	0.70693	CDS_21323_Unigene_34083|CDS_13841_Unigene_22848	http://www.genome.jp/kegg-bin/show_pathway?ath03013/ath:AT3G60240%09red/ath:AT1G14850%09red
Peroxisome	KEGG PATHWAY	ath04146	1	87	0.686668	0.727663	CDS_1861_Unigene_3713	http://www.genome.jp/kegg-bin/show_pathway?ath04146/ath:AT5G17550%09red
Ribosome biogenesis in eukaryotes	KEGG PATHWAY	ath03008	1	100	0.736115	0.768591	CDS_22062_Unigene_35211	http://www.genome.jp/kegg-bin/show_pathway?ath03008/ath:AT3G55620%09red
Pyrimidine metabolism	KEGG PATHWAY	ath00240	1	116	0.786419	0.809214	CDS_6000_Unigene_10687	http://www.genome.jp/kegg-bin/show_pathway?ath00240/ath:AT4G14930%09red
Phenylpropanoid biosynthesis	KEGG PATHWAY	ath00940	1	157	0.87585	0.877483	CDS_27346_Unigene_45127	http://www.genome.jp/kegg-bin/show_pathway?ath00940/ath:AT4G33420%09red
Purine metabolism	KEGG PATHWAY	ath00230	1	158	0.877483	0.877483	CDS_6000_Unigene_10687	http://www.genome.jp/kegg-bin/show_pathway?ath00230/ath:AT4G14930%09red
#Term	Database	ID	Input number	Background number	P-Value	Corrected P-Value	Input	Hyperlink
#Term	Database	ID	Input number	Background number	P-Value	Corrected P-Value	Input	Hyperlink
--------------------
--------------------
--------------------

## Sheet: SALT Down-regulated
#Term	Database	ID	Input number	Background number	P-Value	Corrected P-Value	Input	Hyperlink
Starch and sucrose metabolism	KEGG PATHWAY	ath00500	11	202	0.00142667	0.116987	CDS_14676_Unigene_24128|CDS_739_Unigene_1387|CDS_1660_Unigene_3393|CDS_573_Unigene_1065|CDS_7367_Unigene_13078|CDS_4866_Unigene_8761|CDS_9375_Unigene_16091|CDS_16385_Unigene_26737|CDS_16815_Unigene_27375|CDS_16885_Unigene_27480|CDS_21914_Unigene_34996	http://www.genome.jp/kegg-bin/show_pathway?ath00500/ath:AT1G06410%09red/ath:AT4G02320%09red/ath:AT3G61130%09red/ath:AT1G23870%09red/ath:AT4G17770%09red/ath:AT3G25140%09red/ath:AT2G40840%09red/ath:AT5G19730%09red/ath:AT3G29320%09red/ath:AT3G23820%09red/ath:AT1G78580%09red
Alanine, aspartate and glutamate metabolism	KEGG PATHWAY	ath00250	4	48	0.0130119	0.419372	CDS_3086_Unigene_5827|CDS_15045_Unigene_24685|CDS_22912_Unigene_36444|CDS_6229_Unigene_11165	http://www.genome.jp/kegg-bin/show_pathway?ath00250/ath:AT5G17330%09red/ath:AT4G31990%09red/ath:AT4G34740%09red/ath:AT3G27740%09red
Aminoacyl-tRNA biosynthesis	KEGG PATHWAY	ath00970	6	115	0.0199952	0.419372	CDS_2149_Unigene_4260|CDS_24300_Unigene_38628|CDS_8202_Unigene_14322|CDS_6587_Unigene_11870|CDS_7955_Unigene_13962|CDS_9015_Unigene_15548	http://www.genome.jp/kegg-bin/show_pathway?ath00970/ath:AT1G50200%09red/ath:AT1G09620%09red/ath:AT5G49030%09red/ath:AT3G11710%09red/ath:AT3G48110%09red/ath:AT5G26830%09red
Purine metabolism	KEGG PATHWAY	ath00230	7	158	0.0267323	0.419372	CDS_3086_Unigene_5827|CDS_3960_Unigene_7284|CDS_4094_Unigene_7547|CDS_21219_Unigene_33914|CDS_14062_Unigene_23185|CDS_13303_Unigene_22007|CDS_11708_Unigene_19589	http://www.genome.jp/kegg-bin/show_pathway?ath00230/ath:AT4G04955%09red/ath:AT4G34900%09red/ath:AT4G34740%09red/ath:AT5G52920%09red/ath:AT3G27060%09red/ath:AT2G21790%09red/ath:AT2G35040%09red
RNA transport	KEGG PATHWAY	ath03013	7	169	0.0360819	0.419372	CDS_498_Unigene_934|CDS_82_Unigene_171|CDS_14019_Unigene_23124|CDS_1369_Unigene_2751|CDS_7438_Unigene_13182|CDS_13144_Unigene_21753|CDS_5472_Unigene_9766	http://www.genome.jp/kegg-bin/show_pathway?ath03013/ath:AT3G08943%09red/ath:AT2G13540%09red/ath:AT1G76810%09red/ath:AT5G51200%09red/ath:AT3G56150%09red/ath:AT2G47300%09red/ath:AT4G11420%09red
Ribosome biogenesis in eukaryotes	KEGG PATHWAY	ath03008	5	100	0.0376601	0.419372	CDS_5472_Unigene_9766|CDS_2148_Unigene_4258|CDS_16554_Unigene_26998|CDS_4117_Unigene_7589|CDS_5427_Unigene_9687	http://www.genome.jp/kegg-bin/show_pathway?ath03008/ath:AT1G06720%09red/ath:AT2G47300%09red/ath:AT1G50920%09red/ath:AT5G67240%09red/ath:AT1G75660%09red
Metabolic pathways	KEGG PATHWAY	ath01100	45	1910	0.0376803	0.419372	CDS_3086_Unigene_5827|CDS_5242_Unigene_9386|CDS_16285_Unigene_26600|CDS_14676_Unigene_24128|CDS_5527_Unigene_9856|CDS_1387_Unigene_2791|CDS_2177_Unigene_4330|CDS_11275_Unigene_18931|CDS_15045_Unigene_24685|CDS_559_Unigene_1040|CDS_11708_Unigene_19589|CDS_21219_Unigene_33914|CDS_6460_Unigene_11631|CDS_153_Unigene_337|CDS_6233_Unigene_11172|CDS_9056_Unigene_15615|CDS_3960_Unigene_7284|CDS_3880_Unig…	http://www.genome.jp/kegg-bin/show_pathway?ath01100/ath:AT4G04955%09red/ath:AT4G02320%09red/ath:AT2G40840%09red/ath:AT5G17330%09red/ath:AT4G16130%09red/ath:AT5G27650%09red/ath:AT4G34740%09red/ath:AT4G39330%09red/ath:AT2G21790%09red/ath:AT3G12670%09red/ath:AT4G34900%09red/ath:AT3G23820%09red/ath:AT3G27740%09red/ath:AT2G36530%09red/ath:AT5G63840%09red/ath:AT1G23870%09red/ath:AT1G79750%09red/ath:AT2…
Protein processing in endoplasmic reticulum	KEGG PATHWAY	ath04141	8	212	0.0409144	0.419372	CDS_10265_Unigene_17454|CDS_26564_Unigene_43214|CDS_1661_Unigene_3394|CDS_10266_Unigene_17455|CDS_600_Unigene_1112|CDS_20894_Unigene_33432|CDS_26555_Unigene_43203|CDS_21980_Unigene_35100	http://www.genome.jp/kegg-bin/show_pathway?ath04141/ath:AT1G08450%09red/ath:AT5G15400%09red/ath:AT2G21160%09red/ath:AT3G63460%09red/ath:AT5G63840%09red/ath:AT3G18860%09red/ath:AT4G16660%09red
Endocytosis	KEGG PATHWAY	ath04144	6	142	0.046602	0.424596	CDS_27651_Unigene_45606|CDS_9056_Unigene_15615|CDS_1842_Unigene_3681|CDS_21410_Unigene_34231|CDS_6460_Unigene_11631|CDS_8619_Unigene_14925	http://www.genome.jp/kegg-bin/show_pathway?ath04144/ath:AT4G05520%09red/ath:AT1G13980%09red/ath:AT3G15730%09red/ath:AT4G35730%09red/ath:AT4G35790%09red/ath:AT1G77740%09red
RNA degradation	KEGG PATHWAY	ath03018	5	112	0.0553398	0.44523	CDS_22115_Unigene_35283|CDS_12259_Unigene_20395|CDS_9002_Unigene_15524|CDS_9316_Unigene_16003|CDS_5427_Unigene_9687	http://www.genome.jp/kegg-bin/show_pathway?ath03018/ath:AT1G80780%09red/ath:AT1G02080%09red/ath:AT4G00660%09red/ath:AT2G36530%09red/ath:AT1G75660%09red
Folate biosynthesis	KEGG PATHWAY	ath00790	2	22	0.065678	0.44523	CDS_19626_Unigene_31598|CDS_19624_Unigene_31596	http://www.genome.jp/kegg-bin/show_pathway?ath00790/ath:AT2G28880%09red
DNA replication	KEGG PATHWAY	ath03030	3	50	0.0659221	0.44523	CDS_5589_Unigene_9961|CDS_25762_Unigene_41595|CDS_15928_Unigene_26084	http://www.genome.jp/kegg-bin/show_pathway?ath03030/ath:AT2G24490%09red/ath:AT5G44635%09red/ath:AT5G46280%09red
Isoquinoline alkaloid biosynthesis	KEGG PATHWAY	ath00950	2	23	0.0705853	0.44523	CDS_22912_Unigene_36444|CDS_11275_Unigene_18931	http://www.genome.jp/kegg-bin/show_pathway?ath00950/ath:AT4G31990%09red/ath:AT2G20340%09red
Galactose metabolism	KEGG PATHWAY	ath00052	3	55	0.0815623	0.477722	CDS_2864_Unigene_5481|CDS_6197_Unigene_11088|CDS_3368_Unigene_6237	http://www.genome.jp/kegg-bin/show_pathway?ath00052/ath:AT5G20250%09red/ath:AT5G40390%09red/ath:AT4G01970%09red
Ether lipid metabolism	KEGG PATHWAY	ath00565	2	27	0.0913117	0.493252	CDS_9056_Unigene_15615|CDS_21410_Unigene_34231	http://www.genome.jp/kegg-bin/show_pathway?ath00565/ath:AT4G35790%09red/ath:AT3G15730%09red
Amino sugar and nucleotide sugar metabolism	KEGG PATHWAY	ath00520	5	135	0.100476	0.493252	CDS_1660_Unigene_3393|CDS_7367_Unigene_13078|CDS_9375_Unigene_16091|CDS_12816_Unigene_21253|CDS_5534_Unigene_9866	http://www.genome.jp/kegg-bin/show_pathway?ath00520/ath:AT3G61130%09red/ath:AT5G17770%09red/ath:AT3G23820%09red/ath:AT3G25140%09red/ath:AT4G16130%09red
Carotenoid biosynthesis	KEGG PATHWAY	ath00906	2	29	0.10226	0.493252	CDS_15402_Unigene_25220|CDS_3889_Unigene_7141	http://www.genome.jp/kegg-bin/show_pathway?ath00906/ath:AT4G19170%09red/ath:AT5G67030%09red
Biosynthesis of secondary metabolites	KEGG PATHWAY	ath01110	25	1076	0.114008	0.504996	CDS_3086_Unigene_5827|CDS_5242_Unigene_9386|CDS_16285_Unigene_26600|CDS_14676_Unigene_24128|CDS_2177_Unigene_4330|CDS_11275_Unigene_18931|CDS_14062_Unigene_23185|CDS_11708_Unigene_19589|CDS_9056_Unigene_15615|CDS_3960_Unigene_7284|CDS_6126_Unigene_10951|CDS_9002_Unigene_15524|CDS_15402_Unigene_25220|CDS_1953_Unigene_3845|CDS_8528_Unigene_14797|CDS_22585_Unigene_35966|CDS_526_Unigene_978|CDS_21410…	http://www.genome.jp/kegg-bin/show_pathway?ath01110/ath:AT5G17330%09red/ath:AT3G15730%09red/ath:AT4G34740%09red/ath:AT4G39330%09red/ath:AT4G34900%09red/ath:AT2G36530%09red/ath:AT2G20340%09red/ath:AT1G43710%09red/ath:AT5G62190%09red/ath:AT1G61720%09red/ath:AT5G43760%09red/ath:AT5G67030%09red/ath:AT1G15710%09red/ath:AT4G35790%09red/ath:AT3G29320%09red/ath:AT2G35040%09red/ath:AT1G20950%09red/ath:AT4…
Ubiquitin mediated proteolysis	KEGG PATHWAY	ath04120	5	142	0.117011	0.504996	CDS_5687_Unigene_10145|CDS_9897_Unigene_16905|CDS_600_Unigene_1112|CDS_16033_Unigene_26237|CDS_11031_Unigene_18577	http://www.genome.jp/kegg-bin/show_pathway?ath04120/ath:AT2G21470%09red/ath:AT5G15400%09red/ath:AT4G38600%09red/ath:AT5G22920%09red/ath:AT5G05560%09red
Arginine biosynthesis	KEGG PATHWAY	ath00220	2	35	0.136983	0.56163	CDS_16285_Unigene_26600|CDS_22912_Unigene_36444	http://www.genome.jp/kegg-bin/show_pathway?ath00220/ath:AT3G57560%09red/ath:AT4G31990%09red
Cysteine and methionine metabolism	KEGG PATHWAY	ath00270	4	112	0.146987	0.569883	CDS_1387_Unigene_2791|CDS_2177_Unigene_4330|CDS_12100_Unigene_20166|CDS_22912_Unigene_36444	http://www.genome.jp/kegg-bin/show_pathway?ath00270/ath:AT1G31230%09red/ath:AT4G31990%09red/ath:AT5G27650%09red/ath:AT1G49820%09red
2-Oxocarboxylic acid metabolism	KEGG PATHWAY	ath01210	3	74	0.152895	0.569883	CDS_8528_Unigene_14797|CDS_16285_Unigene_26600|CDS_22912_Unigene_36444	http://www.genome.jp/kegg-bin/show_pathway?ath01210/ath:AT1G24100%09red/ath:AT3G57560%09red/ath:AT4G31990%09red
Pyrimidine metabolism	KEGG PATHWAY	ath00240	4	116	0.160125	0.570879	CDS_13303_Unigene_22007|CDS_21219_Unigene_33914|CDS_3880_Unigene_7124|CDS_6229_Unigene_11165	http://www.genome.jp/kegg-bin/show_pathway?ath00240/ath:AT3G12670%09red/ath:AT3G27060%09red/ath:AT2G21790%09red/ath:AT3G27740%09red
Tyrosine metabolism	KEGG PATHWAY	ath00350	2	40	0.167571	0.572533	CDS_22912_Unigene_36444|CDS_11275_Unigene_18931	http://www.genome.jp/kegg-bin/show_pathway?ath00350/ath:AT4G31990%09red/ath:AT2G20340%09red
Pentose and glucuronate interconversions	KEGG PATHWAY	ath00040	3	81	0.182884	0.599858	CDS_7552_Unigene_13365|CDS_739_Unigene_1387|CDS_573_Unigene_1065	http://www.genome.jp/kegg-bin/show_pathway?ath00040/ath:AT5G19730%09red/ath:AT4G02320%09red/ath:AT3G27400%09red
Pyruvate metabolism	KEGG PATHWAY	ath00620	3	85	0.200669	0.600881	CDS_14062_Unigene_23185|CDS_19347_Unigene_31187|CDS_545_Unigene_1006	http://www.genome.jp/kegg-bin/show_pathway?ath00620/ath:AT5G52920%09red/ath:AT1G79750%09red/ath:AT1G67280%09red
Glycerophospholipid metabolism	KEGG PATHWAY	ath00564	3	86	0.205179	0.600881	CDS_5242_Unigene_9386|CDS_9056_Unigene_15615|CDS_21410_Unigene_34231	http://www.genome.jp/kegg-bin/show_pathway?ath00564/ath:AT4G35790%09red/ath:AT1G01610%09red/ath:AT3G15730%09red
Phagosome	KEGG PATHWAY	ath04145	3	86	0.205179	0.600881	CDS_11753_Unigene_19651|CDS_6233_Unigene_11172|CDS_21980_Unigene_35100	http://www.genome.jp/kegg-bin/show_pathway?ath04145/ath:AT1G12840%09red/ath:AT1G08450%09red/ath:AT5G23860%09red
Taurine and hypotaurine metabolism	KEGG PATHWAY	ath00430	1	14	0.233048	0.613734	CDS_15045_Unigene_24685	http://www.genome.jp/kegg-bin/show_pathway?ath00430/ath:AT5G17330%09red
Monobactam biosynthesis	KEGG PATHWAY	ath00261	1	14	0.233048	0.613734	CDS_2177_Unigene_4330	http://www.genome.jp/kegg-bin/show_pathway?ath00261/ath:AT1G31230%09red
Glycerolipid metabolism	KEGG PATHWAY	ath00561	2	53	0.250884	0.613734	CDS_5242_Unigene_9386|CDS_21616_Unigene_34542	http://www.genome.jp/kegg-bin/show_pathway?ath00561/ath:AT3G51520%09red/ath:AT1G01610%09red
Nicotinate and nicotinamide metabolism	KEGG PATHWAY	ath00760	1	16	0.259714	0.613734	CDS_559_Unigene_1040	http://www.genome.jp/kegg-bin/show_pathway?ath00760/ath:AT3G21070%09red
Lysine biosynthesis	KEGG PATHWAY	ath00300	1	16	0.259714	0.613734	CDS_2177_Unigene_4330	http://www.genome.jp/kegg-bin/show_pathway?ath00300/ath:AT1G31230%09red
Basal transcription factors	KEGG PATHWAY	ath03022	2	55	0.263906	0.613734	CDS_24137_Unigene_38344|CDS_1963_Unigene_3866	http://www.genome.jp/kegg-bin/show_pathway?ath03022/ath:AT5G25150%09red/ath:AT5G43130%09red
Spliceosome	KEGG PATHWAY	ath03040	5	192	0.26445	0.613734	CDS_12283_Unigene_20427|CDS_5651_Unigene_10085|CDS_9504_Unigene_16296|CDS_14956_Unigene_24547|CDS_7438_Unigene_13182	http://www.genome.jp/kegg-bin/show_pathway?ath03040/ath:AT2G13540%09red/ath:AT3G26560%09red/ath:AT3G26420%09red/ath:AT4G03430%09red/ath:AT1G26370%09red
Butanoate metabolism	KEGG PATHWAY	ath00650	1	17	0.272698	0.613734	CDS_15045_Unigene_24685	http://www.genome.jp/kegg-bin/show_pathway?ath00650/ath:AT5G17330%09red
Phenylalanine, tyrosine and tryptophan biosynthesis	KEGG PATHWAY	ath00400	2	57	0.276929	0.613734	CDS_22585_Unigene_35966|CDS_22912_Unigene_36444	http://www.genome.jp/kegg-bin/show_pathway?ath00400/ath:AT4G31990%09red/ath:AT1G15710%09red
Histidine metabolism	KEGG PATHWAY	ath00340	1	18	0.285455	0.615983	CDS_6697_Unigene_12097	http://www.genome.jp/kegg-bin/show_pathway?ath00340/ath:AT1G43710%09red
Glucosinolate biosynthesis	KEGG PATHWAY	ath00966	1	19	0.297989	0.620606	CDS_8528_Unigene_14797	http://www.genome.jp/kegg-bin/show_pathway?ath00966/ath:AT1G24100%09red
Biosynthesis of amino acids	KEGG PATHWAY	ath01230	6	255	0.308918	0.620606	CDS_16285_Unigene_26600|CDS_22912_Unigene_36444|CDS_2177_Unigene_4330|CDS_9002_Unigene_15524|CDS_14062_Unigene_23185|CDS_22585_Unigene_35966	http://www.genome.jp/kegg-bin/show_pathway?ath01230/ath:AT2G36530%09red/ath:AT4G31990%09red/ath:AT1G15710%09red/ath:AT3G57560%09red/ath:AT5G52920%09red/ath:AT1G31230%09red
One carbon pool by folate	KEGG PATHWAY	ath00670	1	20	0.310303	0.620606	CDS_11708_Unigene_19589	http://www.genome.jp/kegg-bin/show_pathway?ath00670/ath:AT2G35040%09red
Flavonoid biosynthesis	KEGG PATHWAY	ath00941	1	21	0.322402	0.629451	CDS_526_Unigene_978	http://www.genome.jp/kegg-bin/show_pathway?ath00941/ath:AT1G61720%09red
Inositol phosphate metabolism	KEGG PATHWAY	ath00562	2	68	0.347927	0.655242	CDS_4764_Unigene_8589|CDS_6460_Unigene_11631	http://www.genome.jp/kegg-bin/show_pathway?ath00562/ath:AT4G26260%09red/ath:AT1G77740%09red
Glycolysis / Gluconeogenesis	KEGG PATHWAY	ath00010	3	117	0.351593	0.655242	CDS_6126_Unigene_10951|CDS_9002_Unigene_15524|CDS_14062_Unigene_23185	http://www.genome.jp/kegg-bin/show_pathway?ath00010/ath:AT5G52920%09red/ath:AT2G36530%09red/ath:AT1G20950%09red
ABC transporters	KEGG PATHWAY	ath02010	1	26	0.379791	0.692064	CDS_21904_Unigene_34988	http://www.genome.jp/kegg-bin/show_pathway?ath02010/ath:AT2G47000%09red
Regulation of autophagy	KEGG PATHWAY	ath04140	1	28	0.401365	0.705303	CDS_4669_Unigene_8438	http://www.genome.jp/kegg-bin/show_pathway?ath04140/ath:AT2G37840%09red
Photosynthesis	KEGG PATHWAY	ath00195	2	77	0.404259	0.705303	CDS_6483_Unigene_11673|CDS_6681_Unigene_12070	http://www.genome.jp/kegg-bin/show_pathway?ath00195/ath:AT2G27510%09red/ath:AT1G30380%09red
Peroxisome	KEGG PATHWAY	ath04146	2	87	0.463982	0.738082	CDS_3960_Unigene_7284|CDS_153_Unigene_337	http://www.genome.jp/kegg-bin/show_pathway?ath04146/ath:AT2G04350%09red/ath:AT4G34900%09red
Fatty acid elongation	KEGG PATHWAY	ath00062	1	35	0.471142	0.738082	CDS_16449_Unigene_26836	http://www.genome.jp/kegg-bin/show_pathway?ath00062/ath:AT5G43760%09red
Tropane, piperidine and pyridine alkaloid biosynthesis	KEGG PATHWAY	ath00960	1	36	0.480424	0.738082	CDS_22912_Unigene_36444	http://www.genome.jp/kegg-bin/show_pathway?ath00960/ath:AT4G31990%09red
Glutathione metabolism	KEGG PATHWAY	ath00480	2	93	0.498085	0.738082	CDS_13303_Unigene_22007|CDS_21219_Unigene_33914	http://www.genome.jp/kegg-bin/show_pathway?ath00480/ath:AT3G27060%09red/ath:AT2G21790%09red
Mismatch repair	KEGG PATHWAY	ath03430	1	39	0.507307	0.738082	CDS_5589_Unigene_9961	http://www.genome.jp/kegg-bin/show_pathway?ath03430/ath:AT2G24490%09red
beta-Alanine metabolism	KEGG PATHWAY	ath00410	1	40	0.515955	0.738082	CDS_15045_Unigene_24685	http://www.genome.jp/kegg-bin/show_pathway?ath00410/ath:AT5G17330%09red
Sulfur metabolism	KEGG PATHWAY	ath00920	1	41	0.524452	0.738082	CDS_5527_Unigene_9856	http://www.genome.jp/kegg-bin/show_pathway?ath00920/ath:AT5G04590%09red
Fatty acid degradation	KEGG PATHWAY	ath00071	1	41	0.524452	0.738082	CDS_153_Unigene_337	http://www.genome.jp/kegg-bin/show_pathway?ath00071/ath:AT2G04350%09red
Fatty acid biosynthesis	KEGG PATHWAY	ath00061	1	41	0.524452	0.738082	CDS_153_Unigene_337	http://www.genome.jp/kegg-bin/show_pathway?ath00061/ath:AT2G04350%09red
Ascorbate and aldarate metabolism	KEGG PATHWAY	ath00053	1	41	0.524452	0.738082	CDS_4764_Unigene_8589	http://www.genome.jp/kegg-bin/show_pathway?ath00053/ath:AT4G26260%09red
Phenylalanine metabolism	KEGG PATHWAY	ath00360	1	42	0.532801	0.738082	CDS_22912_Unigene_36444	http://www.genome.jp/kegg-bin/show_pathway?ath00360/ath:AT4G31990%09red
Nitrogen metabolism	KEGG PATHWAY	ath00910	1	42	0.532801	0.738082	CDS_1172_Unigene_2271	http://www.genome.jp/kegg-bin/show_pathway?ath00910/ath:AT2G41220%09red
Base excision repair	KEGG PATHWAY	ath03410	1	43	0.541003	0.738082	CDS_2897_Unigene_5532	http://www.genome.jp/kegg-bin/show_pathway?ath03410/ath:AT2G31320%09red
N-Glycan biosynthesis	KEGG PATHWAY	ath00510	1	44	0.549061	0.738082	CDS_1661_Unigene_3394	http://www.genome.jp/kegg-bin/show_pathway?ath00510/ath:AT5G63840%09red
Tryptophan metabolism	KEGG PATHWAY	ath00380	1	46	0.564757	0.743006	CDS_8528_Unigene_14797	http://www.genome.jp/kegg-bin/show_pathway?ath00380/ath:AT1G24100%09red
Plant-pathogen interaction	KEGG PATHWAY	ath04626	3	167	0.574914	0.743006	CDS_3644_Unigene_6686|CDS_27197_Unigene_44625|CDS_5006_Unigene_8998	http://www.genome.jp/kegg-bin/show_pathway?ath04626/ath:AT3G07040%09red/ath:AT5G46330%09red/ath:AT4G23650%09red
Porphyrin and chlorophyll metabolism	KEGG PATHWAY	ath00860	1	48	0.579907	0.743006	CDS_26454_Unigene_43028	http://www.genome.jp/kegg-bin/show_pathway?ath00860/ath:AT5G43860%09red
mRNA surveillance pathway	KEGG PATHWAY	ath03015	2	114	0.605942	0.753323	CDS_19065_Unigene_30794|CDS_7438_Unigene_13182	http://www.genome.jp/kegg-bin/show_pathway?ath03015/ath:AT2G13540%09red/ath:AT1G17720%09red
Protein export	KEGG PATHWAY	ath03060	1	53	0.61552	0.753323	CDS_24278_Unigene_38593	http://www.genome.jp/kegg-bin/show_pathway?ath03060/ath:AT5G03940%09red
Arginine and proline metabolism	KEGG PATHWAY	ath00330	1	53	0.61552	0.753323	CDS_22912_Unigene_36444	http://www.genome.jp/kegg-bin/show_pathway?ath00330/ath:AT4G31990%09red
Homologous recombination	KEGG PATHWAY	ath03440	1	56	0.635425	0.759226	CDS_5589_Unigene_9961	http://www.genome.jp/kegg-bin/show_pathway?ath03440/ath:AT2G24490%09red
Proteasome	KEGG PATHWAY	ath03050	1	58	0.64812	0.759226	CDS_22520_Unigene_35873	http://www.genome.jp/kegg-bin/show_pathway?ath03050/ath:AT1G75990%09red
Pentose phosphate pathway	KEGG PATHWAY	ath00030	1	58	0.64812	0.759226	CDS_6126_Unigene_10951	http://www.genome.jp/kegg-bin/show_pathway?ath00030/ath:AT1G20950%09red
Fructose and mannose metabolism	KEGG PATHWAY	ath00051	1	64	0.683618	0.776763	CDS_6126_Unigene_10951	http://www.genome.jp/kegg-bin/show_pathway?ath00051/ath:AT1G20950%09red
Fatty acid metabolism	KEGG PATHWAY	ath01212	1	67	0.700004	0.776763	CDS_153_Unigene_337	http://www.genome.jp/kegg-bin/show_pathway?ath01212/ath:AT2G04350%09red
Phosphatidylinositol signaling system	KEGG PATHWAY	ath04070	1	68	0.705275	0.776763	CDS_6460_Unigene_11631	http://www.genome.jp/kegg-bin/show_pathway?ath04070/ath:AT1G77740%09red
Nucleotide excision repair	KEGG PATHWAY	ath03420	1	69	0.710454	0.776763	CDS_5589_Unigene_9961	http://www.genome.jp/kegg-bin/show_pathway?ath03420/ath:AT2G24490%09red
Carbon fixation in photosynthetic organisms	KEGG PATHWAY	ath00710	1	69	0.710454	0.776763	CDS_19347_Unigene_31187	http://www.genome.jp/kegg-bin/show_pathway?ath00710/ath:AT1G79750%09red
Glycine, serine and threonine metabolism	KEGG PATHWAY	ath00260	1	72	0.725452	0.782725	CDS_2177_Unigene_4330	http://www.genome.jp/kegg-bin/show_pathway?ath00260/ath:AT1G31230%09red
Glyoxylate and dicarboxylate metabolism	KEGG PATHWAY	ath00630	1	74	0.735018	0.782746	CDS_1172_Unigene_2271	http://www.genome.jp/kegg-bin/show_pathway?ath00630/ath:AT2G41220%09red
Phenylpropanoid biosynthesis	KEGG PATHWAY	ath00940	2	157	0.770289	0.809791	CDS_3192_Unigene_5974|CDS_22633_Unigene_36034	http://www.genome.jp/kegg-bin/show_pathway?ath00940/ath:AT4G39330%09red/ath:AT3G24503%09red
Carbon metabolism	KEGG PATHWAY	ath01200	3	262	0.845811	0.877931	CDS_14062_Unigene_23185|CDS_19347_Unigene_31187|CDS_9002_Unigene_15524	http://www.genome.jp/kegg-bin/show_pathway?ath01200/ath:AT5G52920%09red/ath:AT1G79750%09red/ath:AT2G36530%09red
Oxidative phosphorylation	KEGG PATHWAY	ath00190	1	162	0.944479	0.965511	CDS_6233_Unigene_11172	http://www.genome.jp/kegg-bin/show_pathway?ath00190/ath:AT1G12840%09red
Plant hormone signal transduction	KEGG PATHWAY	ath04075	2	271	0.953737	0.965511	CDS_13206_Unigene_21855|CDS_4869_Unigene_8768	http://www.genome.jp/kegg-bin/show_pathway?ath04075/ath:AT5G65670%09red/ath:AT1G19850%09red
Ribosome	KEGG PATHWAY	ath03010	2	363	0.988546	0.988546	CDS_475_Unigene_895|CDS_10680_Unigene_18054	http://www.genome.jp/kegg-bin/show_pathway?ath03010/ath:AT3G09200%09red/ath:AT5G45775%09red
#Term	Database	ID	Input number	Background number	P-Value	Corrected P-Value	Input	Hyperlink
#Term	Database	ID	Input number	Background number	P-Value	Corrected P-Value	Input	Hyperlink
--------------------
--------------------
--------------------
